# Supplementary material
Source: MDPI journal article supplement (https://www.mdpi.com/2304-6740/9/2/10)
Supplement: s1 [file s1]

Archive with 3 entries (3 files):
- inorganics-1065506-CIFCHECKED.PDF
- 2025900.cif
- 2025901.cif
