# Supplementary material
Source: MDPI journal article supplement (https://www.mdpi.com/2304-6740/9/2/10)
Supplement: s1 [file s1 › 2025900.cif]

####################################################################### 
# 
# This file contains crystal structure data downloaded from the 
# Cambridge Structural Database (CSD) hosted by the Cambridge 
# Crystallographic Data Centre (CCDC).
# 
# Full information about CCDC data access policies and citation 
# guidelines are available at http://www.ccdc.cam.ac.uk/access/V1 
# 
# Audit and citation data items may have been added by the CCDC. 
# Please retain this information to preserve the provenance of 
# this file and to allow appropriate attribution of the data. 
# 
#######################################################################

data_NiL2_200K
_audit_block_doi                 10.5517/ccdc.csd.cc2603mz
_database_code_depnum_ccdc_archive 'CCDC 2025900'
loop_
_audit_author_name
_audit_author_address
'Takayuki Ishida'
;The University of ElectroCommunications
Japan
;
_audit_update_record             
;
2020-08-28 deposited with the CCDC.	2020-11-11 downloaded from the CCDC.
;

#==============================================================================
# CHEMICAL DATA

_chemical_formula_sum            'C30 H34 N4 Ni O2'
_chemical_formula_moiety         'C30 H34 N4 Ni O2'
_chemical_formula_weight         541.32
_chemical_melting_point          ?

#==============================================================================
# CRYSTAL DATA
_space_group_crystal_system      monoclinic
_space_group_name_H-M_alt        'P 1 21/c 1'
_space_group_name_Hall           '-P 2ybc'
_space_group_IT_number           14
loop_
_space_group_symop_id
_space_group_symop_operation_xyz
1 +X,+Y,+Z
2 -X,1/2+Y,1/2-Z
3 -X,-Y,-Z
4 +X,-1/2-Y,-1/2+Z
#------------------------------------------------------------------------------
_cell_length_a                   13.276(3)
_cell_length_b                   8.2907(17)
_cell_length_c                   12.530(3)
_cell_angle_alpha                90.0000
_cell_angle_beta                 93.021(6)
_cell_angle_gamma                90.0000
_cell_volume                     1377.2(5)
_cell_formula_units_Z            2
_cell_measurement_reflns_used    6255
_cell_measurement_theta_min      2.46
_cell_measurement_theta_max      30.47
_cell_measurement_temperature    200
#------------------------------------------------------------------------------
_exptl_crystal_description       Block
_exptl_crystal_colour            Green
_exptl_crystal_size_max          0.31
_exptl_crystal_size_mid          0.28
_exptl_crystal_size_min          0.12
_exptl_crystal_density_diffrn    1.305
_exptl_crystal_density_meas      ?
_exptl_crystal_density_method    'not measured'
_exptl_crystal_F_000             572.00
_exptl_absorpt_coefficient_mu    0.738
_exptl_absorpt_correction_type   multi-scan
_exptl_absorpt_process_details   'REQAB (Rigaku, 1998)'
_exptl_absorpt_correction_T_min  0.380
_exptl_absorpt_correction_T_max  0.863

#==============================================================================
# EXPERIMENTAL DATA

_diffrn_ambient_temperature      200
_diffrn_radiation_type           'Mo K\a'
_diffrn_radiation_wavelength     0.71073
_diffrn_measurement_device_type  'Rigaku Saturn70'
_diffrn_measurement_method       \w
_diffrn_detector_area_resol_mean 14.629
_diffrn_reflns_number            24179
_diffrn_reflns_av_R_equivalents  0.0935
_diffrn_reflns_theta_max         30.807
_diffrn_reflns_theta_min         2.898
_diffrn_reflns_theta_full        25.242
_diffrn_measured_fraction_theta_max 0.883
_diffrn_measured_fraction_theta_full 0.996
_diffrn_reflns_Laue_measured_fraction_max 0.883
_diffrn_reflns_Laue_measured_fraction_full 0.996
_diffrn_reflns_point_group_measured_fraction_max 0.883
_diffrn_reflns_point_group_measured_fraction_full 0.996
_diffrn_reflns_limit_h_min       -18
_diffrn_reflns_limit_h_max       18
_diffrn_reflns_limit_k_min       -11
_diffrn_reflns_limit_k_max       10
_diffrn_reflns_limit_l_min       -17
_diffrn_reflns_limit_l_max       17
_diffrn_standards_number         0
_diffrn_standards_interval_count .
_diffrn_standards_decay_%        ?
_reflns_number_total             3805
_reflns_number_gt                2653
_reflns_threshold_expression     F^2^>2.0\s(F^2^)
_reflns_Friedel_coverage         0.000
_reflns_Friedel_fraction_max     .
_reflns_Friedel_fraction_full    .

#==============================================================================
# REFINEMENT DATA

_refine_special_details          
;
    Refinement was performed using all reflections. The weighted 
    R-factor (wR) and goodness of fit (S) are based on F^2^.
    R-factor (gt) are based on F. The threshold expression of
    F^2^ > 2.0 sigma(F^2^) is used only for calculating R-factor (gt).
;
_refine_ls_structure_factor_coef Fsqd
_refine_ls_R_factor_all          0.0867
_refine_ls_R_factor_gt           0.0535
_refine_ls_wR_factor_ref         0.1562
_refine_ls_wR_factor_gt          0.1328
_refine_ls_number_restraints     0
_refine_ls_hydrogen_treatment    constr
_refine_ls_number_reflns         3805
_refine_ls_number_parameters     169
_refine_ls_goodness_of_fit_ref   1.007
_refine_ls_weighting_scheme      calc
_refine_ls_weighting_details     
'w = 1/[\s^2^(Fo^2^)+(0.0812P)^2^] where P=(Fo^2^+2Fc^2^)/3'
_atom_sites_solution_hydrogens   geom
_atom_sites_solution_primary     direct
_atom_sites_solution_secondary   difmap
_refine_ls_shift/su_max          0.000
_refine_diff_density_max         0.54
_refine_diff_density_min         -0.69
_refine_ls_extinction_method     none
_refine_ls_extinction_coef       ?

loop_
_atom_type_symbol
_atom_type_description
_atom_type_scat_dispersion_real
_atom_type_scat_dispersion_imag
_atom_type_scat_source
C C 0.0033 0.0016
;
International Tables for Crystallography
(Vol. C, Tables 4.2.6.8 and 6.1.1.4)
;
H H 0.0000 0.0000
;
International Tables for Crystallography
(Vol. C, Table 6.1.1.4)
;
N N 0.0061 0.0033
;
International Tables for Crystallography
(Vol. C, Tables 4.2.6.8 and 6.1.1.4)
;
Ni Ni 0.3393 1.1124
;
International Tables for Crystallography
(Vol. C, Tables 4.2.6.8 and 6.1.1.4)
;
O O 0.0106 0.0060
;
International Tables for Crystallography
(Vol. C, Tables 4.2.6.8 and 6.1.1.4)
;

#==============================================================================
# ATOMIC COORDINATES AND THERMAL PARAMETERS

loop_
_atom_site_label
_atom_site_type_symbol
_atom_site_fract_x
_atom_site_fract_y
_atom_site_fract_z
_atom_site_U_iso_or_equiv
_atom_site_adp_type
_atom_site_occupancy
_atom_site_site_symmetry_order
_atom_site_calc_flag
_atom_site_refinement_flags_posn
_atom_site_refinement_flags_adp
_atom_site_refinement_flags_occupancy
_atom_site_disorder_assembly
_atom_site_disorder_group
Ni1 Ni 0.5000 0.0000 1.0000 0.02384(17) Uani 1 2 d S . P . .
C3 C 0.39686(16) 0.3893(3) 0.75709(17) 0.0343(5) Uani 1 1 d . . . . .
H3A H 0.3795 0.4682 0.7043 0.041 Uiso 1 1 calc R U . . .
C4 C 0.32050(15) 0.2868(2) 0.79338(15) 0.0283(4) Uani 1 1 d . . . . .
C5 C 0.35256(15) 0.1704(2) 0.86656(15) 0.0270(4) Uani 1 1 d . . . . .
H5A H 0.3041 0.0961 0.8905 0.032 Uiso 1 1 calc R U . . .
C6 C 0.21363(16) 0.3011(3) 0.75525(16) 0.0313(5) Uani 1 1 d . . . . .
C7 C 0.18661(18) 0.3586(3) 0.65315(17) 0.0385(5) Uani 1 1 d . . . . .
H7A H 0.2376 0.3908 0.6071 0.046 Uiso 1 1 calc R U . . .
C8 C 0.0855(2) 0.3691(3) 0.61807(19) 0.0512(7) Uani 1 1 d . . . . .
H8A H 0.0683 0.4080 0.5481 0.061 Uiso 1 1 calc R U . . .
C9 C 0.0106(2) 0.3243(4) 0.6830(2) 0.0561(7) Uani 1 1 d . . . . .
H9A H -0.0581 0.3316 0.6583 0.067 Uiso 1 1 calc R U . . .
C10 C 0.0360(2) 0.2683(4) 0.7850(2) 0.0591(8) Uani 1 1 d . . . . .
H10A H -0.0156 0.2371 0.8306 0.071 Uiso 1 1 calc R U . . .
C11 C 0.13610(18) 0.2577(3) 0.8208(2) 0.0470(6) Uani 1 1 d . . . . .
H11A H 0.1525 0.2202 0.8912 0.056 Uiso 1 1 calc R U . . .
C12 C 0.70312(16) 0.3426(3) 0.91848(16) 0.0307(5) Uani 1 1 d . . . . .
C13 C 0.78216(18) 0.2817(3) 1.00094(19) 0.0475(6) Uani 1 1 d . . . . .
H13A H 0.8419 0.3512 1.0009 0.057 Uiso 1 1 calc R U . . .
H13B H 0.7545 0.2835 1.0719 0.057 Uiso 1 1 calc R U . . .
H13C H 0.8011 0.1710 0.9832 0.057 Uiso 1 1 calc R U . . .
C14 C 0.74573(17) 0.3365(3) 0.80783(18) 0.0427(6) Uani 1 1 d . . . . .
H14A H 0.8050 0.4067 0.8064 0.051 Uiso 1 1 calc R U . . .
H14B H 0.7652 0.2255 0.7917 0.051 Uiso 1 1 calc R U . . .
H14C H 0.6943 0.3733 0.7543 0.051 Uiso 1 1 calc R U . . .
C15 C 0.6727(2) 0.5133(3) 0.9494(2) 0.0466(8) Uani 1 1 d . . . . .
H15A H 0.7316 0.5844 0.9486 0.056 Uiso 1 1 calc R U . . .
H15B H 0.6201 0.5529 0.8981 0.056 Uiso 1 1 calc R U . . .
H15C H 0.6468 0.5121 1.0212 0.056 Uiso 1 1 calc R U . . .
O1 O 0.62080(10) 0.10328(16) 0.98924(11) 0.0305(3) Uani 1 1 d . . . . .
N1 N 0.61273(13) 0.2350(2) 0.91982(14) 0.0310(4) Uani 1 1 d . . . . .
N2 N 0.44889(12) 0.15626(19) 0.90600(12) 0.0248(4) Uani 1 1 d . . . . .
C1 C 0.52079(15) 0.2611(2) 0.87414(15) 0.0276(4) Uani 1 1 d . . . . .
C2 C 0.49369(16) 0.3784(3) 0.79526(17) 0.0353(5) Uani 1 1 d . . . . .
H2A H 0.5434 0.4489 0.7695 0.042 Uiso 1 1 calc R U . . .

loop_
_atom_site_aniso_label
_atom_site_aniso_U_11
_atom_site_aniso_U_22
_atom_site_aniso_U_33
_atom_site_aniso_U_23
_atom_site_aniso_U_13
_atom_site_aniso_U_12
Ni1 0.0270(3) 0.0213(3) 0.0232(3) 0.00273(11) 0.00122(19) -0.00081(11)
C3 0.0338(12) 0.0343(12) 0.0350(11) 0.0137(9) 0.0034(10) 0.0041(9)
C4 0.0308(11) 0.0295(10) 0.0246(9) 0.0018(8) 0.0022(8) 0.0027(8)
C5 0.0311(11) 0.0256(10) 0.0247(9) -0.0016(8) 0.0040(9) -0.0020(8)
C6 0.0340(12) 0.0278(11) 0.0317(10) 0.0014(8) -0.0013(9) 0.0029(8)
C7 0.0396(13) 0.0433(13) 0.0325(11) 0.0028(10) 0.0020(10) 0.0104(10)
C8 0.0494(16) 0.0641(18) 0.0387(13) -0.0001(12) -0.0105(12) 0.0180(13)
C9 0.0361(14) 0.0683(19) 0.0626(17) 0.0006(15) -0.0110(13) 0.0041(12)
C10 0.0354(14) 0.078(2) 0.0638(18) 0.0182(15) 0.0032(14) -0.0022(13)
C11 0.0340(13) 0.0603(17) 0.0467(13) 0.0166(12) 0.0004(11) -0.0015(11)
C12 0.0308(11) 0.0295(11) 0.0319(10) 0.0047(8) 0.0021(9) -0.0071(8)
C13 0.0401(14) 0.0521(15) 0.0487(14) 0.0122(12) -0.0117(12) -0.0193(11)
C14 0.0347(13) 0.0522(15) 0.0417(12) 0.0087(11) 0.0083(10) 0.0012(10)
C15 0.057(2) 0.0342(15) 0.0492(17) -0.0068(10) 0.0070(15) -0.0106(10)
O1 0.0310(8) 0.0271(8) 0.0332(7) 0.0113(6) 0.0001(6) -0.0031(6)
N1 0.0297(9) 0.0277(9) 0.0353(9) 0.0112(7) -0.0013(8) -0.0061(7)
N2 0.0264(9) 0.0236(8) 0.0247(8) 0.0006(7) 0.0036(7) -0.0015(6)
C1 0.0294(11) 0.0260(10) 0.0277(10) 0.0028(8) 0.0046(9) -0.0002(8)
C2 0.0328(12) 0.0338(12) 0.0396(12) 0.0134(9) 0.0047(10) -0.0014(9)

#==============================================================================
_computing_data_collection       'CrystalClear (Rigaku/MSC Inc., 2006)'
_computing_cell_refinement       CrystalClear
_computing_data_reduction        CrystalClear
_computing_structure_solution    'SIR2011 (Burla, et al., 2012)'
_computing_structure_refinement  'SHELXL Version 2014/7 (Sheldrick, 2008)'
_computing_publication_material  'CrystalStructure 4.2.1 (Rigaku, 2016)'
_computing_molecular_graphics    'CrystalStructure 4.2.1'

#==============================================================================
# MOLECULAR GEOMETRY

_geom_special_details            
;
 All esds (except the esd in the dihedral angle between two l.s. planes)
 are estimated using the full covariance matrix.  The cell esds are taken
 into account individually in the estimation of esds in distances, angles
 and torsion angles; correlations between esds in cell parameters are only
 used when they are defined by crystal symmetry.  An approximate (isotropic)
 treatment of cell esds is used for estimating esds involving l.s. planes.
;

loop_
_geom_bond_atom_site_label_1
_geom_bond_atom_site_label_2
_geom_bond_distance
_geom_bond_site_symmetry_2
_geom_bond_publ_flag
Ni1 O1 1.8292(14) 3_657 ?
Ni1 O1 1.8292(14) . ?
Ni1 N2 1.8552(16) 3_657 ?
Ni1 N2 1.8552(16) . ?
C3 C2 1.351(3) . ?
C3 C4 1.416(3) . ?
C3 H3A 0.9500 . ?
C4 C5 1.383(3) . ?
C4 C6 1.478(3) . ?
C5 N2 1.352(2) . ?
C5 H5A 0.9500 . ?
C6 C7 1.394(3) . ?
C6 C11 1.397(3) . ?
C7 C8 1.392(3) . ?
C7 H7A 0.9500 . ?
C8 C9 1.369(4) . ?
C8 H8A 0.9500 . ?
C9 C10 1.385(4) . ?
C9 H9A 0.9500 . ?
C10 C11 1.383(3) . ?
C10 H10A 0.9500 . ?
C11 H11A 0.9500 . ?
C12 N1 1.496(3) . ?
C12 C13 1.520(3) . ?
C12 C14 1.526(3) . ?
C12 C15 1.527(3) . ?
C13 H13A 0.9800 . ?
C13 H13B 0.9800 . ?
C13 H13C 0.9800 . ?
C14 H14A 0.9800 . ?
C14 H14B 0.9800 . ?
C14 H14C 0.9800 . ?
C15 H15A 0.9800 . ?
C15 H15B 0.9800 . ?
C15 H15C 0.9800 . ?
O1 N1 1.397(2) . ?
N1 C1 1.338(3) . ?
N2 C1 1.366(2) . ?
C1 C2 1.420(3) . ?
C2 H2A 0.9500 . ?

loop_
_geom_angle_atom_site_label_1
_geom_angle_atom_site_label_2
_geom_angle_atom_site_label_3
_geom_angle
_geom_angle_site_symmetry_1
_geom_angle_site_symmetry_3
_geom_angle_publ_flag
O1 Ni1 O1 180.0 3_657 . ?
O1 Ni1 N2 85.36(6) 3_657 3_657 ?
O1 Ni1 N2 94.64(6) . 3_657 ?
O1 Ni1 N2 94.64(6) 3_657 . ?
O1 Ni1 N2 85.36(6) . . ?
N2 Ni1 N2 180.00(9) 3_657 . ?
C2 C3 C4 122.03(19) . . ?
C2 C3 H3A 119.0 . . ?
C4 C3 H3A 119.0 . . ?
C5 C4 C3 115.55(18) . . ?
C5 C4 C6 121.80(18) . . ?
C3 C4 C6 122.65(17) . . ?
N2 C5 C4 123.71(18) . . ?
N2 C5 H5A 118.1 . . ?
C4 C5 H5A 118.1 . . ?
C7 C6 C11 117.7(2) . . ?
C7 C6 C4 121.35(19) . . ?
C11 C6 C4 120.93(18) . . ?
C8 C7 C6 120.5(2) . . ?
C8 C7 H7A 119.7 . . ?
C6 C7 H7A 119.7 . . ?
C9 C8 C7 120.9(2) . . ?
C9 C8 H8A 119.6 . . ?
C7 C8 H8A 119.6 . . ?
C8 C9 C10 119.4(2) . . ?
C8 C9 H9A 120.3 . . ?
C10 C9 H9A 120.3 . . ?
C11 C10 C9 120.2(2) . . ?
C11 C10 H10A 119.9 . . ?
C9 C10 H10A 119.9 . . ?
C10 C11 C6 121.3(2) . . ?
C10 C11 H11A 119.4 . . ?
C6 C11 H11A 119.4 . . ?
N1 C12 C13 108.67(17) . . ?
N1 C12 C14 109.06(18) . . ?
C13 C12 C14 109.33(19) . . ?
N1 C12 C15 109.04(19) . . ?
C13 C12 C15 108.5(2) . . ?
C14 C12 C15 112.13(19) . . ?
C12 C13 H13A 109.5 . . ?
C12 C13 H13B 109.5 . . ?
H13A C13 H13B 109.5 . . ?
C12 C13 H13C 109.5 . . ?
H13A C13 H13C 109.5 . . ?
H13B C13 H13C 109.5 . . ?
C12 C14 H14A 109.5 . . ?
C12 C14 H14B 109.5 . . ?
H14A C14 H14B 109.5 . . ?
C12 C14 H14C 109.5 . . ?
H14A C14 H14C 109.5 . . ?
H14B C14 H14C 109.5 . . ?
C12 C15 H15A 109.5 . . ?
C12 C15 H15B 109.5 . . ?
H15A C15 H15B 109.5 . . ?
C12 C15 H15C 109.5 . . ?
H15A C15 H15C 109.5 . . ?
H15B C15 H15C 109.5 . . ?
N1 O1 Ni1 111.91(11) . . ?
C1 N1 O1 115.51(16) . . ?
C1 N1 C12 127.84(17) . . ?
O1 N1 C12 115.97(16) . . ?
C5 N2 C1 120.02(17) . . ?
C5 N2 Ni1 126.87(13) . . ?
C1 N2 Ni1 113.08(13) . . ?
N1 C1 N2 114.09(17) . . ?
N1 C1 C2 126.89(19) . . ?
N2 C1 C2 118.96(19) . . ?
C3 C2 C1 119.59(19) . . ?
C3 C2 H2A 120.2 . . ?
C1 C2 H2A 120.2 . . ?

loop_
_geom_torsion_atom_site_label_1
_geom_torsion_atom_site_label_2
_geom_torsion_atom_site_label_3
_geom_torsion_atom_site_label_4
_geom_torsion
_geom_torsion_site_symmetry_1
_geom_torsion_site_symmetry_2
_geom_torsion_site_symmetry_3
_geom_torsion_site_symmetry_4
_geom_torsion_publ_flag
C2 C3 C4 C5 -2.9(3) . . . . ?
C2 C3 C4 C6 177.7(2) . . . . ?
C3 C4 C5 N2 2.8(3) . . . . ?
C6 C4 C5 N2 -177.87(17) . . . . ?
C5 C4 C6 C7 -149.9(2) . . . . ?
C3 C4 C6 C7 29.4(3) . . . . ?
C5 C4 C6 C11 30.3(3) . . . . ?
C3 C4 C6 C11 -150.4(2) . . . . ?
C11 C6 C7 C8 -1.1(3) . . . . ?
C4 C6 C7 C8 179.1(2) . . . . ?
C6 C7 C8 C9 0.4(4) . . . . ?
C7 C8 C9 C10 0.2(4) . . . . ?
C8 C9 C10 C11 -0.1(5) . . . . ?
C9 C10 C11 C6 -0.7(5) . . . . ?
C7 C6 C11 C10 1.2(4) . . . . ?
C4 C6 C11 C10 -179.0(2) . . . . ?
N2 Ni1 O1 N1 179.22(12) 3_657 . . . ?
N2 Ni1 O1 N1 -0.78(12) . . . . ?
Ni1 O1 N1 C1 -0.4(2) . . . . ?
Ni1 O1 N1 C12 170.83(13) . . . . ?
C13 C12 N1 C1 167.2(2) . . . . ?
C14 C12 N1 C1 -73.7(3) . . . . ?
C15 C12 N1 C1 49.1(3) . . . . ?
C13 C12 N1 O1 -2.8(2) . . . . ?
C14 C12 N1 O1 116.33(19) . . . . ?
C15 C12 N1 O1 -120.9(2) . . . . ?
C4 C5 N2 C1 0.3(3) . . . . ?
C4 C5 N2 Ni1 -177.47(14) . . . . ?
O1 Ni1 N2 C5 -0.25(16) 3_657 . . . ?
O1 Ni1 N2 C5 179.75(16) . . . . ?
O1 Ni1 N2 C1 -178.17(13) 3_657 . . . ?
O1 Ni1 N2 C1 1.83(13) . . . . ?
O1 N1 C1 N2 1.9(3) . . . . ?
C12 N1 C1 N2 -168.11(17) . . . . ?
O1 N1 C1 C2 -175.08(19) . . . . ?
C12 N1 C1 C2 14.9(4) . . . . ?
C5 N2 C1 N1 179.39(17) . . . . ?
Ni1 N2 C1 N1 -2.5(2) . . . . ?
C5 N2 C1 C2 -3.3(3) . . . . ?
Ni1 N2 C1 C2 174.74(15) . . . . ?
C4 C3 C2 C1 0.0(3) . . . . ?
N1 C1 C2 C3 -180.0(2) . . . . ?
N2 C1 C2 C3 3.1(3) . . . . ?

#==============================================================================

_shelx_res_file                  
;

    shelxl.res created by SHELXL-2014/7


TITL NiL2_200K
CELL  0.71073 13.27580 8.29070 12.53030 90.000 93.021 90.000
ZERR  2 0.00300 0.00170 0.00270 0.000 0.005 0.000
LATT 1
SYMM    -X, 1/2+Y, 1/2-Z
SFAC C H N NI O
UNIT 60 68 8 2 4
L.S. 20
FMAP 2
PLAN -50
WPDB -2
LIST 4
TEMP -73.0
ACTA
SIZE 0.310 0.280 0.120
BOND $H
CONF
REM HTAB
HTAB
WGHT    0.081200
FVAR       1.99880
NI1   4    0.500000    0.000000    1.000000    10.50000    0.02700    0.02127 =
         0.02325    0.00273    0.00122   -0.00081
C3    1    0.396860    0.389311    0.757093    11.00000    0.03383    0.03428 =
         0.03498    0.01367    0.00344    0.00406
AFIX  43
H3A   2    0.379452    0.468152    0.704279    11.00000   -1.20000
AFIX   0
C4    1    0.320500    0.286821    0.793382    11.00000    0.03084    0.02954 =
         0.02465    0.00177    0.00219    0.00275
C5    1    0.352562    0.170370    0.866564    11.00000    0.03110    0.02559 =
         0.02466   -0.00157    0.00401   -0.00199
AFIX  43
H5A   2    0.304133    0.096097    0.890461    11.00000   -1.20000
AFIX   0
C6    1    0.213627    0.301111    0.755250    11.00000    0.03403    0.02785 =
         0.03166    0.00145   -0.00132    0.00293
C7    1    0.186606    0.358588    0.653155    11.00000    0.03957    0.04335 =
         0.03247    0.00278    0.00205    0.01037
AFIX  43
H7A   2    0.237566    0.390813    0.607149    11.00000   -1.20000
AFIX   0
C8    1    0.085547    0.369145    0.618068    11.00000    0.04943    0.06414 =
         0.03868   -0.00008   -0.01050    0.01796
AFIX  43
H8A   2    0.068344    0.407963    0.548135    11.00000   -1.20000
AFIX   0
C9    1    0.010625    0.324320    0.683024    11.00000    0.03609    0.06831 =
         0.06260    0.00061   -0.01100    0.00409
AFIX  43
H9A   2   -0.058116    0.331563    0.658315    11.00000   -1.20000
AFIX   0
C10   1    0.035962    0.268343    0.785042    11.00000    0.03540    0.07811 =
         0.06381    0.01823    0.00323   -0.00222
AFIX  43
H10A  2   -0.015579    0.237149    0.830624    11.00000   -1.20000
AFIX   0
C11   1    0.136096    0.257723    0.820755    11.00000    0.03396    0.06034 =
         0.04665    0.01657    0.00044   -0.00153
AFIX  43
H11A  2    0.152472    0.220205    0.891180    11.00000   -1.20000
AFIX   0
C12   1    0.703118    0.342565    0.918485    11.00000    0.03082    0.02950 =
         0.03189    0.00471    0.00209   -0.00706
C13   1    0.782161    0.281664    1.000944    11.00000    0.04013    0.05212 =
         0.04866    0.01219   -0.01169   -0.01934
AFIX  33
H13A  2    0.841856    0.351190    1.000863    11.00000   -1.20000
H13B  2    0.754497    0.283544    1.071916    11.00000   -1.20000
H13C  2    0.801102    0.170984    0.983229    11.00000   -1.20000
AFIX   0
C14   1    0.745734    0.336459    0.807825    11.00000    0.03471    0.05223 =
         0.04172    0.00866    0.00831    0.00122
AFIX  33
H14A  2    0.805020    0.406702    0.806411    11.00000   -1.20000
H14B  2    0.765222    0.225450    0.791680    11.00000   -1.20000
H14C  2    0.694334    0.373301    0.754308    11.00000   -1.20000
AFIX   0
C15   1    0.672675    0.513272    0.949362    11.00000    0.05702    0.03415 =
         0.04919   -0.00683    0.00702   -0.01057
AFIX  33
H15A  2    0.731592    0.584405    0.948646    11.00000   -1.20000
H15B  2    0.620114    0.552896    0.898084    11.00000   -1.20000
H15C  2    0.646784    0.512053    1.021168    11.00000   -1.20000
AFIX   0
O1    5    0.620799    0.103275    0.989236    11.00000    0.03100    0.02707 =
         0.03316    0.01134    0.00007   -0.00313
N1    3    0.612733    0.235050    0.919819    11.00000    0.02973    0.02773 =
         0.03528    0.01116   -0.00125   -0.00614
N2    3    0.448888    0.156259    0.906003    11.00000    0.02643    0.02356 =
         0.02473    0.00062    0.00358   -0.00146
C1    1    0.520789    0.261082    0.874144    11.00000    0.02942    0.02596 =
         0.02767    0.00275    0.00458   -0.00023
C2    1    0.493690    0.378430    0.795258    11.00000    0.03281    0.03381 =
         0.03956    0.01342    0.00473   -0.00140
AFIX  43
H2A   2    0.543350    0.448866    0.769473    11.00000   -1.20000
AFIX   0
HKLF 4

REM  NiL2_200K
REM R1 =  0.0535 for    2653 Fo > 4sig(Fo)  and  0.0867 for all    3805 data
REM    169 parameters refined using      0 restraints

END

WGHT      0.0812      0.0000

REM Instructions for potential hydrogen bonds
EQIV $1 -x+1, -y, -z+2
HTAB C5 O1_$1

REM Highest difference peak  0.541,  deepest hole -0.693,  1-sigma level  0.110
Q1    1   0.5974  0.1342  1.0142  11.00000  0.05    0.54
Q2    1   0.6419  0.1487  1.1202  11.00000  0.05    0.50
Q3    1   0.3947  0.2380  1.0722  11.00000  0.05    0.49
Q4    1   0.3978 -0.0013  0.9484  11.00000  0.05    0.45
Q5    1   0.6199  0.0130  0.9848  11.00000  0.05    0.45
Q6    1   0.5496  0.1552  1.0902  11.00000  0.05    0.43
Q7    1   0.3934  0.1071  1.0129  11.00000  0.05    0.42
Q8    1   0.5017  0.1671  1.0088  11.00000  0.05    0.41
Q9    1   0.2618  0.5023  0.6302  11.00000  0.05    0.41
Q10   1   0.6975  0.1649  0.8643  11.00000  0.05    0.39
Q11   1   0.4986  0.0403  1.0948  11.00000  0.05    0.39
Q12   1   0.3164 -0.0352  0.9165  11.00000  0.05    0.39
Q13   1   0.6812  0.6835  0.9195  11.00000  0.05    0.38
Q14   1   0.6584  0.3223  0.6989  11.00000  0.05    0.37
Q15   1   0.6013  0.2534  0.9385  11.00000  0.05    0.37
Q16   1   0.5171  0.0038  1.1620  11.00000  0.05    0.36
Q17   1   0.1787  0.1159  0.8781  11.00000  0.05    0.36
Q18   1   0.4200 -0.0054  1.1112  11.00000  0.05    0.35
Q19   1   0.3430  0.1479  0.8920  11.00000  0.05    0.35
Q20   1   0.8573  0.5011  1.0780  11.00000  0.05    0.35
Q21   1   0.6797  0.2063  0.7127  11.00000  0.05    0.35
Q22   1   0.7440  0.1031  0.9408  11.00000  0.05    0.35
Q23   1   0.5957  0.5023  0.9966  11.00000  0.05    0.34
Q24   1   0.3508  0.4810  0.6744  11.00000  0.05    0.34
Q25   1   0.3196  0.5143  0.5880  11.00000  0.05    0.34
Q26   1   0.3170  0.0015  0.7753  11.00000  0.05    0.34
Q27   1   0.4532  0.1000  0.9241  11.00000  0.05    0.34
Q28   1   0.5152  0.3075  0.9776  11.00000  0.05    0.34
Q29   1   0.6655  0.3027  0.9049  11.00000  0.05    0.33
Q30   1   0.5629  0.1072  0.9440  11.00000  0.05    0.33
Q31   1   0.3138  0.5856  0.7313  11.00000  0.05    0.33
Q32   1   0.7643  0.5061  0.7520  11.00000  0.05    0.33
Q33   1   0.2506  0.0577  0.8835  11.00000  0.05    0.33
Q34   1   0.3924  0.0031  0.8146  11.00000  0.05    0.33
Q35   1   0.5005  0.0645  0.9135  11.00000  0.05    0.32
Q36   1   0.3359  0.0521  0.8746  11.00000  0.05    0.32
Q37   1   0.4756  0.2713  1.1187  11.00000  0.05    0.32
Q38   1   0.9141 -0.0031  0.3053  11.00000  0.05    0.32
Q39   1   0.3428  0.2040  0.8129  11.00000  0.05    0.32
Q40   1   0.2197  0.4840  0.7396  11.00000  0.05    0.31
Q41   1   0.1205  0.4910  0.7021  11.00000  0.05    0.31
Q42   1   0.1772  0.1964  0.6273  11.00000  0.05    0.31
Q43   1   0.6772  0.2934  0.7656  11.00000  0.05    0.31
Q44   1   0.5642  0.2321  0.8799  11.00000  0.05    0.31
Q45   1   0.5805  0.0207  1.0948  11.00000  0.05    0.31
Q46   1   0.7234  0.1517  1.1442  11.00000  0.05    0.31
Q47   1   0.5652  0.3606  1.1298  11.00000  0.05    0.30
Q48   1   0.7860  0.7167  0.9963  11.00000  0.05    0.30
Q49   1   0.0572  0.5000  0.7419  11.00000  0.05    0.30
Q50   1   0.1816  0.5060  0.6567  11.00000  0.05    0.30
;

_shelx_res_checksum              94616

_shelx_hkl_file                  
;
   0   0  -2  297.92   43.05
   0   0   2  262.80   15.02
   0   0  -2  316.41   27.95
   0   0   2  366.40   52.14
   0   0   2  318.82   30.84
   0   0  -2  335.24   27.97
   0   0   3    3.81    7.01
   0   0  -3    2.79   11.98
   0   0   3    3.67   18.54
   0   0   3   15.37   11.66
   0   0  -3   15.97   18.06
   0   0  -3   -4.00    9.09
   0   0   410445.79  521.32
   0   0  -410821.33  539.74
   0   0  -411725.77  565.92
   0   0   410229.82  491.88
   0   0  -410690.73  540.13
   0   0   412143.98  608.95
   0   0   5   10.73   21.72
   0   0  -5   13.64   13.40
   0   0   5    8.67   10.76
   0   0   5    7.35   24.90
   0   0   5    6.99   24.98
   0   0   5   22.39   33.24
   0   0   6 3981.23  234.90
   0   0   6 3604.29  235.41
   0   0  -6 4726.77  269.44
   0   0   6 4438.09  269.09
   0   0   6 4292.01  276.83
   0   0   7    7.75   22.66
   0   0   7   16.39   20.52
   0   0   7   18.75   28.69
   0   0   7   11.31   36.63
   0   0  -7   40.34   30.35
   0   0   7    3.42   19.01
   0   0   8 6647.20  530.60
   0   0   8 7302.37  579.09
   0   0   8 7187.82  523.16
   0   0   8 6943.94  542.30
   0   0   8 6513.52  501.71
   0   0  -8 6821.25  499.37
   0   0   9    2.59   24.65
   0   0   9   17.22   25.70
   0   0   9   17.94   13.21
   0   0   9   22.11   21.25
   0   0  -9   -4.74   19.65
   0   0   9   30.81   36.74
   0   0  10 7540.20  605.11
   0   0  10 8454.80  675.44
   0   0  10 9868.36  346.72
   0   0  10 7401.19  548.15
   0   0  10 9023.60  740.32
   0   0 -10 7645.73  570.84
   0   0  11   10.03   15.91
   0   0  11   10.76   37.66
   0   0  11   42.11   35.91
   0   0  11    8.01   33.41
   0   0  11  -20.58   42.04
   0   0 -11    2.24   14.42
   0   0  12 2244.76  438.31
   0   0  12 1986.77  295.56
   0   0  12 2349.79  683.69
   0   0  12 2148.89  295.89
   0   0 -12 1898.96  234.67
   0   0  13   10.61   19.85
   0   0  13  -14.06   49.34
   0   0  13   30.25   48.01
   0   0  13    3.96   25.28
   0   0  13   19.07   28.46
   0   0  14 1514.48  203.85
   0   0  14 1079.20  650.04
   0   0  14 1586.36  362.87
   0   0  14 1653.29  164.53
   0   0  15   -5.80   40.47
   0   0  15   -8.34   55.81
   0   0  15    1.08   25.19
   0   0  16 1363.02  433.21
   0   0  16  725.97  429.25
   0   0  16 1285.64  320.58
   0   0  17    7.38   54.78
   0   1   0    7.25   16.80
   0   1   0   11.44   13.52
   0   1   0   12.39    6.09
   0  -1   0   -3.58   13.82
   0  -1   0    8.47    6.75
   0   1  -3 6580.26  345.67
   0   1   3 7647.91  379.38
   0   1   3 6499.78  337.90
   0   1   3 5991.91  298.83
   0   1  -3 6333.89  350.80
   0   1   3 6398.61  320.99
   0   1  -3 4798.25  237.06
   0   1   3 5114.44  253.10
   0  -1   3 6999.36  347.69
   0  -1   3 6471.35  343.86
   0  -1  -3 5832.93  310.66
   0  -1   3 6033.35  320.14
   0   1   4  690.98   44.14
   0   1  -4  664.45   59.71
   0   1   4  764.34   51.95
   0   1   4  671.38   60.98
   0   1  -4  703.72   51.99
   0   1   4  711.39   59.47
   0   1   4  675.68   48.98
   0   1  -4  718.29   63.55
   0  -1   4  774.70   75.74
   0  -1  -4  778.22   95.99
   0  -1   4  707.35   63.51
   0  -1   4  754.33  135.57
   0   1   5 1108.06   81.25
   0   1   5 1547.53  117.40
   0   1   5 1230.31  107.76
   0   1   5 1500.90  111.88
   0   1  -5 1280.85  105.36
   0   1  -5 1200.15  102.57
   0   1  -5 1293.60   85.81
   0   1   5 1318.95   99.98
   0  -1   5 1207.17   81.71
   0  -1   5 1227.70  114.43
   0  -1   5 1311.66  123.86
   0  -1  -5 1425.59  122.88
   0   1   6 2999.50  173.39
   0   1   6 3965.16  245.91
   0   1   6 3381.29  219.35
   0   1  -6 3471.23  216.08
   0   1   6 3340.91  217.37
   0   1   6 3211.98  178.16
   0   1   6 3099.92  193.21
   0  -1   6 3122.87  174.09
   0  -1   6 3051.60  217.13
   0  -1   6 3413.81  229.21
   0   1   720358.40 1426.93
   0   1   718673.09 1288.50
   0   1   719085.95 1340.93
   0   1   717882.71 1280.77
   0   1  -717958.19 1257.66
   0   1   716707.11 1145.45
   0  -1   720039.80 1417.05
   0  -1   717700.89 1243.18
   0  -1   719280.97 1321.23
   0  -1   715745.03 1105.18
   0   1  -8 5594.50  441.99
   0   1   8 4610.93  357.88
   0   1   8 5546.98  454.81
   0   1  -8 4623.51  343.82
   0   1   8 6517.43  513.04
   0   1   8 5729.29  443.85
   0   1   8 4924.35  372.56
   0   1   8 5100.43  436.77
   0  -1   8 5724.85  421.75
   0  -1   8 5983.93  485.12
   0  -1   8 5280.44  431.26
   0  -1   8 4686.31  446.34
   0   1   9 5182.34  377.97
   0   1   9 4007.30  262.65
   0   1  -9 4682.28  309.49
   0   1   9 5210.26  384.44
   0   1   9 4519.28  307.09
   0   1  -9 4934.09  365.91
   0   1   9 4970.32  354.13
   0   1   9 4688.37  340.79
   0  -1   9 4406.61  343.34
   0  -1   9 5442.17  356.76
   0  -1   9 4368.75  435.22
   0  -1   9 5541.60  419.73
   0   1  10   98.70   43.04
   0   1  10  110.46   56.23
   0   1  10   70.57   28.44
   0   1 -10   98.44   37.14
   0   1  10   57.80   24.85
   0   1  10   88.51   42.14
   0   1  10   52.92   62.42
   0  -1  10   48.93   43.05
   0  -1  10   83.23   71.69
   0  -1  10  102.68   42.91
   0  -1  10  102.25   87.46
   0  -1  10   42.77   49.28
   0   1 -11 3330.20  155.79
   0   1  11 2716.11  421.79
   0   1  11 2830.28  492.33
   0   1  11 2870.48  179.40
   0   1  11 2662.28  188.39
   0   1  11 2529.77  133.73
   0  -1  11 2945.05  512.65
   0  -1  11 2898.86  218.57
   0  -1  11 3368.70  228.64
   0  -1  11 3163.20  238.02
   0  -1  11 3175.18  150.90
   0   1  12   36.93   26.59
   0   1  12   51.31   38.57
   0   1  12   16.72   30.81
   0   1 -12   63.19   23.89
   0   1  12   73.60   54.60
   0   1  12   18.16   31.96
   0   1  12   49.72   22.20
   0  -1  12   91.37   38.83
   0  -1  12   28.19   22.53
   0  -1  12   47.72   45.75
   0  -1  12   40.63   28.55
   0   1  13 1364.88  375.96
   0   1  13  755.62  632.46
   0   1  13 1219.18  406.50
   0   1  13 1227.24  226.83
   0   1 -13 1321.24  151.08
   0   1  13 1133.67  155.80
   0  -1  13 1201.95  355.13
   0  -1  13 1525.28  295.71
   0  -1  13 1156.35  275.75
   0  -1  13 1212.55  532.95
   0   1  14    3.44   45.23
   0   1 -14   12.88   19.19
   0   1  14   21.60   26.80
   0   1  14   -0.80   31.88
   0   1  14   -4.13   58.18
   0  -1  14   16.36   24.38
   0  -1  14   16.26   41.86
   0   1 -15  230.09  145.96
   0   1  15  349.71  206.23
   0   1  15  298.50  263.03
   0   1  15  285.05  392.61
   0  -1  15  269.64  239.14
   0  -1  15  357.70  227.19
   0   1  16  206.77  174.26
   0   1  16  319.10  169.69
   0   1  16  171.11  192.86
   0  -1  16  179.92  194.72
   0  -1  16  196.47  178.02
   0  -1  16  255.47  131.15
   0   1  17  205.56  130.45
   0   2  -314388.00  747.89
   0   2  -315171.52  736.10
   0   2   314795.39  734.31
   0   2  -313871.67  694.52
   0   2   314257.71  696.55
   0  -2  -314827.22  740.69
   0  -2   313313.46  674.99
   0  -2  -315276.96  742.11
   0  -2   314182.86  689.97
   0  -2   315231.44  762.22
   0   2  -413412.21  652.55
   0   2   414463.05  700.26
   0   2   413665.11  656.46
   0   2  -414052.40  714.70
   0   2   413842.43  681.31
   0   2   413600.64  691.12
   0   2  -413062.35  669.98
   0  -2  -413958.11  682.40
   0  -2  -413771.18  697.83
   0  -2   413984.46  715.89
   0  -2   414407.17  706.63
   0  -2   414566.67  759.97
   0   2  -5   45.00   17.32
   0   2   5   10.56   19.86
   0   2   5   13.75   10.66
   0   2  -5    8.18   16.34
   0   2  -5   -3.43   32.76
   0   2   5   23.29   35.27
   0   2   5    7.25    8.83
   0  -2  -5   22.41   19.11
   0  -2   5    7.25   19.55
   0  -2   5   18.12   34.05
   0  -2   5   11.04   22.76
   0   2   6 6178.42  318.85
   0   2  -6 6332.93  417.87
   0   2   6 6022.21  325.89
   0   2  -6 5208.44  383.32
   0   2   6 5212.73  280.73
   0   2  -6 4667.30  242.12
   0   2   6 5487.05  288.76
   0   2   6 6006.60  349.25
   0  -2  -6 5700.23  336.08
   0  -2   6 6753.77  354.86
   0  -2   6 6842.94  410.76
   0  -2   6 6350.41  382.20
   0   2  -7  488.31  166.60
   0   2   7   52.81   34.15
   0   2   7   78.23   36.98
   0   2   7   91.03   31.95
   0   2   7   79.20   49.99
   0   2  -7   69.22   21.49
   0  -2   7   66.41   61.18
   0  -2   7   81.55   44.10
   0  -2   7   29.68   37.95
   0  -2  -7   88.42   33.60
   0  -2   7   82.28   33.76
   0   2   8 3099.72  219.18
   0   2   8 2906.08  288.61
   0   2  -8 2125.59  150.95
   0   2   8 2973.04  228.23
   0   2  -8 3008.53  323.70
   0   2   8 3096.99  481.19
   0   2   8 2623.07  195.62
   0   2   8 2756.00  212.88
   0  -2   8 2458.74  274.16
   0  -2   8 2723.97  234.62
   0  -2   8 2990.41  264.31
   0  -2   8 3546.23  283.31
   0   2   9  188.10   68.94
   0   2   9  185.56   60.14
   0   2   9  142.28  101.78
   0   2   9  179.37   80.88
   0   2  -9  206.69   65.72
   0   2   9  180.30   91.55
   0   2   9  187.76   67.54
   0   2  -9  188.76  121.13
   0  -2   9  239.09  155.96
   0  -2   9  104.30   37.93
   0  -2   9  127.65   80.14
   0  -2   9  221.75   67.26
   0   2  10  218.74  133.61
   0   2 -10  163.81   49.41
   0   2  10  182.71   74.26
   0   2 -10  200.16   96.78
   0   2  10  155.82  110.64
   0   2  10  204.28   65.53
   0   2  10  215.65  128.26
   0  -2  10  206.31   88.53
   0  -2  10  157.51   85.75
   0  -2  10  271.00   91.15
   0  -2  10  197.34   63.31
   0   2  11  132.46  107.37
   0   2  11  158.17   74.27
   0   2  11   96.32   38.06
   0   2 -11   74.28   96.59
   0   2  11   92.19   66.94
   0   2  11  166.62   80.96
   0   2  11  102.47   37.73
   0   2 -11  109.89   43.47
   0  -2  11  139.17   57.41
   0  -2  11  227.79   80.76
   0  -2  11  132.52   61.10
   0   2  12  731.59  214.01
   0   2  12  649.44  351.64
   0   2 -12  796.38  247.90
   0   2  12  527.69  209.35
   0   2  12  885.43  245.58
   0   2  12  925.33  184.90
   0   2  12  557.88  363.83
   0  -2  12  772.88  403.96
   0  -2  12  788.07  356.03
   0  -2  12  837.27  235.23
   0   2  13   -9.23   96.13
   0   2  13   14.39   32.46
   0   2 -13   64.63   37.37
   0   2  13   17.92   19.11
   0   2  13   24.71   37.40
   0   2  13   25.04   26.48
   0   2  13   21.62   18.01
   0  -2  13   37.72   31.32
   0  -2  13   14.82   28.78
   0   2  14  290.93  169.89
   0   2  14  251.64  169.69
   0   2  14  263.00  314.49
   0   2 -14  401.59  115.04
   0  -2  14  209.07  155.38
   0  -2  14  311.63  161.96
   0   2  15   49.77   48.41
   0   2  15  114.37   85.15
   0   2 -15  123.58   76.13
   0  -2  15   66.23   63.38
   0  -2  15   44.28   67.19
   0   2 -16  164.85   73.99
   0   2  16  121.10  108.42
   0  -2  16  133.15   98.84
   0   3   0    4.61    9.22
   0   3   0    6.02   14.51
   0   3   0   14.77   13.36
   0  -3   0    7.23   19.26
   0  -3   0   40.23   35.00
   0  -3   0    1.32   13.99
   0   3   1   63.25   30.79
   0   3  -1   76.37   47.80
   0   3  -1  132.25   47.39
   0   3  -1   60.86   26.45
   0   3   1   25.40   35.10
   0   3   1   66.58   22.79
   0  -3  -1   43.93   19.56
   0  -3   1   71.32   34.19
   0  -3  -1   64.83   20.36
   0  -3   1   63.54   28.35
   0  -3   1  103.08   53.56
   0  -3  -1  116.60   40.97
   0   3   210097.78  537.14
   0   3  -210235.81  525.22
   0   3   2 9643.66  504.64
   0   3  -2 9048.57  459.54
   0   3   2 9947.14  469.21
   0   3  -210570.17  558.80
   0  -3   210368.46  526.78
   0  -3  -210265.81  529.23
   0  -3   2 9166.29  491.83
   0  -3  -2 9843.06  547.71
   0  -3   210565.40  545.29
   0   3   3 7067.74  390.10
   0   3  -3 6829.09  374.50
   0   3   3 6877.69  364.58
   0   3  -3 6894.55  362.78
   0   3  -3 7708.67  438.65
   0  -3  -3 6805.85  381.30
   0  -3   3 6804.75  388.43
   0  -3   3 7412.86  410.48
   0  -3   3 7391.45  388.65
   0  -3  -3 7356.68  399.42
   0   3   4  181.03   72.06
   0   3   4  185.17   37.53
   0   3  -4  172.95   56.14
   0   3   4  185.01   69.38
   0   3  -4  226.37   79.27
   0   3   4  182.04   48.37
   0   3  -4  166.04   66.09
   0  -3   4  156.36   32.82
   0  -3  -4  237.06  103.76
   0  -3   4  230.98   85.53
   0  -3  -4  209.66   90.46
   0  -3   4  205.79   89.64
   0   3   518826.89  935.57
   0   3  -518993.22  951.19
   0   3   518210.15  853.12
   0   3   518925.39  881.93
   0   3   518487.57  903.08
   0   3  -518378.02  879.35
   0   3  -516808.77  840.07
   0  -3   520598.33 1026.91
   0  -3  -519201.07  964.92
   0  -3   518384.20  885.60
   0  -3  -518706.24  913.53
   0  -3   518168.68  946.54
   0   3   6  226.91  100.29
   0   3   6  184.62   93.01
   0   3  -6  203.53  105.67
   0   3  -6  259.10  111.00
   0   3   6  237.96   78.39
   0   3  -6  188.25   64.29
   0   3   6  187.03  100.29
   0  -3   6  178.48   70.06
   0  -3  -6  211.61   88.02
   0  -3   6  250.82   88.50
   0  -3  -6  222.18   76.46
   0  -3   6  248.77   74.61
   0   3   7   95.61   33.65
   0   3  -7  124.60   61.58
   0   3   7  139.55   49.47
   0   3   7   65.43   33.52
   0   3   7   70.28   40.61
   0   3  -7   62.82   26.87
   0   3   7   32.08   27.57
   0  -3   7   90.96   49.09
   0  -3   7   32.52   17.66
   0  -3  -7   70.39   33.21
   0  -3   7   88.89   36.60
   0  -3   7   42.30   39.60
   0   3  -8  264.17  114.84
   0   3   8  170.07   76.08
   0   3  -8  224.99   98.13
   0   3   8  191.19   79.27
   0   3   8  180.13   73.60
   0   3   8  230.92   93.19
   0   3   8  170.07   53.36
   0  -3   8  168.51   77.02
   0  -3   8  257.25  106.69
   0  -3  -8  196.60   85.74
   0  -3   8  116.84   70.75
   0  -3   8  165.14   75.92
   0   3  -9 5130.70  425.44
   0   3   9 3256.89  278.73
   0   3   9 3222.77  282.29
   0   3  -9 3459.69  332.62
   0   3   9 3468.48  299.05
   0   3   9 4213.68  343.67
   0   3   9 3296.93  300.56
   0  -3   9 2961.09  421.89
   0  -3   9 3255.59  313.84
   0  -3   9 3495.00  338.87
   0  -3   9 3224.28  331.92
   0  -3  -9 3508.81  329.97
   0   3  10   -2.48   26.40
   0   3  10   18.16   29.84
   0   3 -10   13.17   19.77
   0   3  10   12.57   30.03
   0   3  10   -4.87   40.06
   0   3  10   19.99   41.83
   0   3  10   12.79   21.78
   0   3 -10  -21.12   50.40
   0  -3  10   34.10   43.59
   0  -3  10   52.80   51.86
   0  -3  10    2.06   28.17
   0   3  11 1962.29  266.35
   0   3  11 2041.47  252.87
   0   3  11 2048.40  271.12
   0   3  11 2138.47  288.12
   0   3  11 2005.14  278.01
   0   3 -11 2332.54  324.56
   0   3 -11 1419.58  179.59
   0   3  11 1827.25  315.56
   0  -3  11 2310.26  387.48
   0  -3  11 1879.55  356.37
   0  -3  11 1917.01  311.93
   0   3  12   59.13   26.76
   0   3  12   70.29   67.84
   0   3  12   38.31   37.47
   0   3  12   68.08   63.63
   0   3  12   47.90   35.27
   0   3 -12   71.71   30.98
   0  -3  12   99.37   61.24
   0  -3  12   33.32   54.35
   0   3  13  864.09  125.65
   0   3 -13  842.27  293.98
   0   3  13  865.58  254.69
   0   3  13  452.02  402.55
   0   3  13 1000.57  282.63
   0   3  13  970.40  214.44
   0  -3  13  947.62  405.81
   0  -3  13  675.41  428.00
   0   3  14   96.84   67.63
   0   3  14   90.36   52.06
   0   3 -14  101.84   47.10
   0   3  14   63.54   71.85
   0  -3  14  197.61   78.91
   0  -3  14   87.15   57.99
   0   3  15  774.28  252.65
   0   3  15  546.63  474.51
   0   3 -15 1024.34  382.29
   0   3  15  847.72  275.26
   0  -3  15  661.06  451.98
   0  -3  15  803.91  296.31
   0   3  16   16.28   40.87
   0   3 -16    5.85   27.67
   0  -3  16   15.30   56.19
   0   4   0 1455.17  119.77
   0   4   0 1412.20  107.93
   0   4   0 1522.82  132.24
   0  -4   0 1211.03   81.59
   0  -4   0 1504.17  273.69
   0  -4   0 1476.13  113.63
   0   4   1 3055.99  210.83
   0   4  -1 3249.59  229.29
   0   4  -1 2902.47  176.95
   0   4   1 2869.11  164.29
   0   4  -1 2894.14  183.75
   0   4   1 3369.60  319.99
   0  -4   1 2807.62  226.38
   0  -4  -1 2606.86  147.35
   0  -4   1 3318.99  207.63
   0  -4  -1 2901.85  182.55
   0  -4   1 2783.45  184.30
   0  -4  -1 2811.50  201.77
   0   4  -2 5173.50  312.77
   0   4   2 5759.80  323.88
   0   4   2 6232.88  362.05
   0   4  -2 6052.45  418.95
   0   4  -2 5559.20  324.94
   0  -4   2 5818.69  325.79
   0  -4  -2 6205.63  341.14
   0  -4  -2 5516.47  344.36
   0  -4  -2 4997.44  238.56
   0  -4   2 5865.90  361.12
   0  -4   2 6052.27  369.16
   0   4   3 1391.42  115.53
   0   4   3 1567.81  203.54
   0   4  -3 1285.11  109.45
   0   4  -3 1567.76  332.55
   0   4  -3 1659.64  147.23
   0  -4   3 1504.28  121.78
   0  -4   3 1456.80  225.04
   0  -4   3 1514.60  114.93
   0  -4  -3 1338.60  182.70
   0  -4  -3 1544.93  148.56
   0   4  -4 5980.97  474.70
   0   4  -4 5055.02  460.67
   0   4  -4 5562.91  420.36
   0   4   4 4998.48  378.57
   0   4   4 5612.54  510.63
   0  -4  -4 5168.64  432.20
   0  -4   4 5023.51  457.07
   0  -4  -4 5743.11  427.08
   0  -4   4 5525.27  442.75
   0  -4   4 5464.08  416.02
   0   4   5  199.72   63.84
   0   4   5  198.32   82.78
   0   4  -5  187.34   67.80
   0   4  -5  189.34   89.24
   0   4  -5  235.77   64.60
   0  -4   5  141.96   49.29
   0  -4   5  184.58   90.42
   0  -4  -5  187.98   78.86
   0  -4   5  187.51   91.33
   0  -4  -5  235.89  110.69
   0   4   6 2085.47  152.16
   0   4   6 2137.89  228.45
   0   4   6 2454.58  186.35
   0   4  -6 2246.80  193.94
   0   4   6 2620.19  303.55
   0   4  -6 2421.90  247.42
   0  -4   6 2133.54  242.69
   0  -4  -6 2401.46  207.06
   0  -4   6 2205.55  253.38
   0  -4  -6 2356.16  345.37
   0  -4   6 2518.14  247.08
   0   4  -7  647.77  110.84
   0   4   7  826.83  240.59
   0   4   7  882.27  365.06
   0   4  -7  873.76  389.41
   0   4   7  618.91   41.20
   0   4   7  806.09  124.40
   0  -4  -7  967.09  292.32
   0  -4   7  808.47  258.32
   0  -4   7  759.92  122.56
   0  -4  -7  687.04  103.08
   0  -4   7  789.58  324.40
   0  -4   7  802.01  400.08
   0   4   8  459.46  131.19
   0   4   8  347.62  133.95
   0   4  -8  356.31  142.92
   0   4  -8  419.67  161.23
   0   4   8  399.91  200.00
   0   4   8  337.00   63.56
   0   4   8  397.49  167.61
   0  -4   8  471.83  243.19
   0  -4   8  412.52  131.10
   0  -4   8  405.11  187.38
   0  -4  -8  521.12  291.19
   0  -4   8  512.12  207.75
   0   4   9   63.36   69.21
   0   4   9   39.88   36.18
   0   4  -9   54.54   47.65
   0   4   9   17.10   23.50
   0   4   9   45.71   34.34
   0   4  -9   66.05   69.85
   0   4   9   48.80   31.98
   0  -4   9   34.68   44.35
   0  -4   9   37.23   24.62
   0  -4  -9   41.47   32.23
   0  -4   9   27.81   36.52
   0   4  10  790.72  173.23
   0   4  10  834.32  101.99
   0   4 -10 3350.59  901.44
   0   4  10  736.66  108.27
   0   4  10 1237.04  161.56
   0   4  10  926.44  119.15
   0  -4 -10 1177.55  538.56
   0  -4  10  869.80  325.91
   0  -4  10  844.56  265.12
   0  -4  10  737.69  238.92
   0   4  11    7.79   18.10
   0   4  11   -0.69   38.41
   0   4  11   13.39   26.60
   0   4  11   -0.78   44.40
   0   4  11   -4.11   25.15
   0   4 -11   31.63   32.61
   0  -4  11   12.29   27.48
   0  -4  11   15.05   49.98
   0   4  12  249.00  329.80
   0   4  12  300.51  218.71
   0   4  12  250.14  171.15
   0   4  12  185.40  174.93
   0   4 -12  295.16  155.35
   0  -4  12  354.10  231.42
   0  -4  12  255.96  145.52
   0   4  13    4.61   34.14
   0   4 -13    2.91   14.06
   0   4  13   10.46   26.38
   0   4  13   -3.64   36.35
   0  -4  13   24.60   41.78
   0  -4  13   17.80   42.97
   0   4 -14  466.42  235.90
   0   4  14  753.38  213.08
   0   4  14  397.65  331.36
   0  -4  14  632.20  353.82
   0  -4  14  380.26  430.91
   0   4  15    7.83   32.92
   0   4 -15    3.96   45.90
   0  -4  15   23.41   56.38
   0   4 -16  517.99  308.09
   0  -4  16  172.32  338.11
   0   5   0   11.37   10.90
   0   5   0   17.30   23.80
   0   5   0   -7.17   39.82
   0  -5   0   16.11   27.35
   0  -5   0   -2.93   32.80
   0  -5   0    2.87   18.07
   0   5   1  246.99   92.50
   0   5  -1  170.14   70.88
   0   5  -1  186.73   77.37
   0   5   1  117.45   59.52
   0   5  -1  188.16   44.52
   0  -5   1  200.91   81.47
   0  -5  -1  163.51   52.80
   0  -5   1  138.44   48.78
   0  -5  -1  174.42   78.42
   0  -5  -1  211.40   79.56
   0  -5   1  159.67   72.28
   0  -5  -1  229.40  107.77
   0   5  -2  209.10   70.62
   0   5   2  287.53   94.34
   0   5  -2  192.90   77.84
   0   5   2  232.71   71.01
   0   5  -2  228.98  125.22
   0  -5   2  230.96   76.69
   0  -5  -2  263.66  128.86
   0  -5   2  216.96   81.91
   0  -5  -2  272.44   81.93
   0  -5  -2  309.18   78.50
   0  -5  -2  236.77  100.57
   0  -5   2  219.24  101.70
   0   5  -3  633.59  253.30
   0   5   3  528.43  212.63
   0   5   3  517.98  248.26
   0   5  -3  542.18  231.20
   0   5  -3  568.13  160.92
   0  -5  -3  470.07   81.11
   0  -5  -3  574.00   95.59
   0  -5   3  533.82  198.84
   0  -5   3  600.28   83.13
   0  -5   3  580.07  287.39
   0   5  -4 1311.84  167.34
   0   5   4  981.28  352.61
   0   5  -4  896.27  107.16
   0   5  -4  913.04  348.32
   0   5   4  675.12  254.78
   0  -5   4 1004.96  193.78
   0  -5  -4  913.67  203.25
   0  -5   4 1011.11  369.08
   0  -5  -4 1213.23  293.57
   0  -5   4  967.79  153.01
   0   5   5  422.90  160.09
   0   5   5  454.69  185.00
   0   5  -5  392.30  145.74
   0   5  -5  477.12  208.39
   0  -5   5  424.02  180.11
   0  -5   5  412.20  106.88
   0  -5   5  389.27  180.00
   0  -5   5  360.09  160.81
   0  -5  -5  467.87  188.56
   0  -5  -5  481.87  192.39
   0   5   6   62.71   34.68
   0   5  -6   67.03   33.88
   0   5  -6   15.05   49.63
   0   5   6   66.86   35.10
   0  -5   6   29.07   33.26
   0  -5   6   47.23   62.06
   0  -5   6   27.94   36.56
   0  -5   6   10.85   54.00
   0  -5  -6   36.30   36.18
   0  -5  -6   19.76   19.46
   0   5  -7  855.26  405.94
   0   5   7 1101.39  367.98
   0   5  -7 1117.62  120.23
   0   5   7 1025.30  124.74
   0  -5   7  993.06  462.52
   0  -5   7  957.02  365.56
   0  -5   7  824.30  120.65
   0  -5   7 1075.03  390.16
   0  -5  -7 1090.58  329.00
   0  -5  -7 1223.76  483.39
   0   5  -8  132.25   98.33
   0   5   8  201.04  154.20
   0   5   8  186.61  115.59
   0   5  -8  211.93  115.74
   0  -5   8  171.70  112.07
   0  -5  -8  273.90  114.25
   0  -5   8  201.87   80.33
   0  -5   8  230.83  143.48
   0  -5  -8  263.19  102.86
   0   5  -9  592.62  201.65
   0   5   9  448.21  198.20
   0   5   9  716.85  205.29
   0   5   9  529.31  309.78
   0   5   9  669.63   65.23
   0  -5   9  576.00  270.67
   0  -5   9  501.54  386.21
   0  -5  -9  707.43  292.89
   0   5  10   39.04   22.10
   0   5 -10   31.18   19.23
   0   5  10   58.36   47.61
   0   5  10   12.43   30.11
   0   5  10   11.37   19.83
   0  -5  10   59.69   80.78
   0  -5 -10   48.99   32.54
   0  -5  10   12.17   25.10
   0   5  11  820.51  225.35
   0   5  11  859.82  225.41
   0   5  11  747.44  214.31
   0   5 -11 2034.34  752.34
   0  -5 -11  805.98  393.92
   0  -5  11  857.02  424.04
   0  -5  11  545.63  375.79
   0   5  12   25.06   33.01
   0   5 -12   38.40   24.70
   0  -5 -12   -4.22   74.09
   0  -5  12   29.81   53.06
   0  -5  12   16.97   35.27
   0   5  13  532.83  242.66
   0   5 -13  388.43  144.20
   0   5  13  374.79  322.66
   0  -5  13  414.65  344.78
   0  -5  13  515.00  259.31
   0   5  14   12.05   39.53
   0   5 -14   10.28   20.48
   0  -5  14   -0.93   42.47
   0  -5  14   27.81   45.13
   0   5  15   76.91  113.60
   0   5 -15  185.96  118.26
   0   5 -16   21.07   25.26
   0   6   0 4213.70  354.70
   0   6   0 3859.65  293.34
   0  -6   0 3436.17  233.74
   0  -6   0 4194.27  338.26
   0  -6   0 4084.59  332.84
   0  -6   0 4002.46  283.28
   0   6  -1   26.63   52.66
   0   6   1   52.26   41.63
   0   6  -1   25.76   34.52
   0   6   1   46.02   46.74
   0  -6  -1   14.11   20.86
   0  -6  -1    9.51   28.54
   0  -6   1   25.91   44.61
   0  -6   1   22.18   13.41
   0  -6  -1   21.35   21.80
   0  -6   1   53.59   30.56
   0  -6   1   68.50   32.41
   0  -6  -1   21.77   24.82
   0   6   2 2141.15  262.04
   0   6   2 2519.06  303.96
   0   6  -2 2402.50  256.67
   0   6  -2 2882.25  311.69
   0  -6   2 1994.05  187.51
   0  -6  -2 2344.92  286.76
   0  -6   2 2615.83  253.48
   0  -6  -2 2960.83  253.48
   0  -6  -2 2612.45  247.80
   0  -6  -2 2394.80  194.53
   0  -6   2 2673.60  586.40
   0  -6   2 2254.33  216.85
   0   6  -3  476.39  223.47
   0   6   3  492.27  184.82
   0   6  -3  468.99  159.22
   0   6   3  495.65  224.28
   0  -6   3  459.20  112.92
   0  -6   3  424.13  225.24
   0  -6  -3  499.18  258.55
   0  -6  -3  505.03  221.04
   0  -6   3  456.64  241.07
   0  -6   3  400.79  148.14
   0   6   4  432.86  221.09
   0   6   4  491.50  212.03
   0   6  -4  428.03  138.41
   0   6  -4  435.39  239.85
   0  -6   4  466.16  163.90
   0  -6  -4  433.67  262.53
   0  -6   4  355.59  158.58
   0  -6   4  488.31  241.03
   0  -6   4  442.78  156.77
   0  -6  -4  489.62  209.98
   0   6   5   27.33   37.71
   0   6  -5   -7.31   61.41
   0   6  -5   12.23   42.00
   0   6   5   52.00   45.95
   0  -6   5   54.11   65.91
   0  -6   5   21.65   28.60
   0  -6  -5   24.93   30.79
   0  -6   5   12.34   29.55
   0  -6   5    3.24   37.28
   0  -6  -5   -1.86   44.91
   0   6  -6 1154.17  342.37
   0   6   6 1021.82  348.44
   0   6   6  979.80  156.76
   0  -6  -6 1084.46  266.68
   0  -6   6 1033.30  531.66
   0  -6   6  862.03  296.00
   0  -6   6  776.88  337.19
   0  -6  -6 1030.43  136.98
   0  -6   6 1100.46  434.05
   0   6   7   17.44   19.88
   0   6  -7   27.21   19.59
   0   6   7   37.14   38.29
   0  -6  -7   51.60   46.18
   0  -6   7   65.57   60.36
   0  -6  -7   61.32   50.43
   0  -6   7   39.83   27.05
   0   6   8  638.43  394.13
   0   6   8  656.40  140.82
   0   6  -8  687.86  222.19
   0  -6   8  631.43  267.93
   0  -6   8  585.14  371.25
   0  -6  -8  708.51  317.84
   0   6   9   25.20   31.24
   0   6   9   14.16   25.55
   0   6  -9    3.13   14.05
   0  -6   9   26.39   70.51
   0  -6   9   11.06   35.08
   0  -6  -9   -2.36   57.96
   0   6  10  725.59  234.12
   0   6 -10  515.83  250.54
   0   6  10  420.05  340.35
   0  -6  10  576.43  429.37
   0  -6 -10  622.23  291.21
   0  -6  10  843.65  416.97
   0   6  11   95.72   62.54
   0   6 -11  181.70   72.47
   0  -6  11  186.60  129.89
   0  -6 -11   75.66   56.53
   0  -6  11  153.97   64.21
   0   6  12  442.33  342.42
   0   6 -12 1711.94  917.98
   0  -6  12  457.10  359.01
   0  -6  12  634.15  336.30
   0  -6 -12  631.77  440.01
   0   6  13   29.75   54.71
   0   6 -13   33.31   27.51
   0  -6  13   29.60   34.60
   0  -6  13   26.08   58.43
   0   6 -14  174.45  111.44
   0   6  14  133.90  153.59
   0  -6  14  112.70  159.43
   0   6  15  -36.63   77.56
   0   6 -15    4.88   31.96
   0   7   0   -1.03   41.93
   0   7   0   11.95   26.33
   0  -7   0    0.33   42.53
   0  -7   0   -1.18   35.15
   0  -7   0   12.53   26.74
   0  -7   0   -2.85   41.99
   0   7   1 3401.05  325.90
   0   7  -1 3542.47  339.92
   0   7   1 2785.17  281.98
   0   7  -1 2839.94  253.40
   0  -7   1 3258.47  256.72
   0  -7  -1 3556.96  279.26
   0  -7   1 2912.41  329.56
   0  -7   1 3939.93  327.95
   0  -7  -1 3057.58  227.75
   0  -7  -1 3250.60  395.40
   0  -7  -1 3019.07  303.69
   0   7   2  118.58   49.26
   0   7  -2   84.82   38.34
   0   7   2   63.62   56.72
   0  -7  -2  118.72   36.08
   0  -7  -2   82.83   27.90
   0  -7  -2   42.90   85.44
   0  -7   2   91.94   36.48
   0  -7   2  128.23   79.29
   0  -7   2   96.17   53.41
   0   7   3  210.89  200.37
   0   7   3  345.21  262.83
   0   7  -3  342.10  158.46
   0  -7  -3  356.40  219.29
   0  -7   3  317.89  178.68
   0  -7   3  321.53  143.25
   0  -7   3  280.40  197.52
   0   7   4    4.97   35.87
   0   7  -4   21.57   28.97
   0   7   4   44.68   52.06
   0  -7  -4   54.69   38.13
   0  -7   4   12.17   51.69
   0  -7   4   19.80   21.37
   0  -7   4   55.88   68.96
   0   7   5 2418.14  513.31
   0   7   5 2186.94  482.39
   0   7  -5 2362.71  484.55
   0  -7   5 1793.77  229.23
   0  -7  -5 1864.81  333.42
   0  -7   5 2203.60  572.43
   0  -7   5 1928.11  243.12
   0   7   6  609.17  399.57
   0   7  -6  904.51  167.79
   0   7   6  656.02  286.22
   0  -7  -6  615.39  304.02
   0  -7   6  547.89  243.31
   0  -7   6  712.64  200.10
   0   7   7 3154.44  523.98
   0   7   7 2899.13  416.47
   0   7  -7 3291.60  421.39
   0  -7   7 3208.16  796.05
   0  -7   7 2571.19  351.51
   0  -7  -7 2806.60  576.08
   0   7   8   71.00   64.79
   0   7  -8   54.34   41.26
   0  -7  -8   87.71   54.60
   0  -7   8   79.48   75.27
   0  -7   8  170.96  108.26
   0   7   9 2361.95  220.44
   0   7  -9 2187.05  253.78
   0  -7   9 2825.84  347.76
   0  -7   9 2697.84  480.43
   0  -7  -9 2606.88  381.90
   0   7  10   12.79   34.90
   0   7 -10   29.70   22.68
   0  -7  10   74.48   60.10
   0  -7  10   -7.45   82.85
   0  -7 -10   26.73   63.95
   0   7 -11  367.33  144.11
   0   7  11  232.54  247.35
   0  -7  11  422.16  297.13
   0  -7  11  492.94  185.70
   0  -7 -11  288.62  252.35
   0   7  12   22.59   46.08
   0   7 -12   -6.64   54.79
   0  -7  12  -27.22   72.22
   0  -7  12   -2.28   93.75
   0  -7 -12  102.75   75.15
   0   7  13  159.71  257.87
   0   7 -13  703.98  467.08
   0   7  14    5.46   55.24
   0   8   0 5005.36  621.13
   0  -8   0 5401.19  659.39
   0  -8   0 5053.35  602.93
   0  -8   0 4852.79  621.20
   0   8   1  260.00  110.86
   0   8  -1  261.68   99.33
   0  -8   1  287.57  137.72
   0  -8  -1  328.31  186.96
   0  -8  -1  274.14  110.67
   0  -8  -1  143.07   41.06
   0  -8   1  259.05  123.35
   0  -8   1  394.90  124.96
   0   8  -2 2046.76  403.46
   0   8   2 2114.00  307.70
   0  -8   2 2331.78  395.22
   0  -8   2 2231.82  333.29
   0  -8  -2 2134.67  327.79
   0  -8   2 2891.14  378.90
   0  -8  -2 2258.68  271.44
   0   8  -3  148.07   65.77
   0   8   3  124.15   71.93
   0  -8   3  198.41   88.45
   0  -8  -3  159.14  100.50
   0  -8   3  163.69   83.78
   0  -8   3  262.89  104.49
   0   8  -4 1264.69  377.78
   0   8   4 1376.67  195.03
   0  -8   4 1416.49  355.75
   0  -8   4 1637.55  554.94
   0  -8  -4 1069.55  561.53
   0  -8   4  781.71  346.68
   0   8   5   15.54   29.72
   0   8  -5   39.53   29.46
   0  -8   5   24.46   53.80
   0  -8   5  -31.14   52.35
   0  -8  -5  -27.06   57.28
   0   8  -6 1091.71  554.71
   0   8   6  957.91  417.16
   0  -8   6  962.23  571.85
   0  -8   6 1250.69  374.20
   0  -8  -6 1056.80  318.69
   0   8   7  169.61  121.26
   0   8  -7  217.14   89.28
   0  -8  -7  270.86  105.99
   0  -8   7  269.43  121.87
   0  -8   7  419.96  212.83
   0   8  -8  677.05  299.39
   0   8   8  680.00  424.77
   0  -8   8  841.91  464.91
   0  -8  -8  578.34  292.91
   0  -8   8  764.81  427.25
   0   8   9   57.17   79.03
   0   8  -9   10.20   18.54
   0  -8  -9   32.26   43.37
   0  -8   9   54.54   58.16
   0  -8   9   49.17   35.29
   0   8  10  421.50  386.93
   0   8 -10  438.14  243.24
   0  -8 -10  544.48  418.68
   0  -8  10  369.83  224.56
   0  -8  10  361.48  267.35
   0   8 -11   -8.90   40.35
   0   8  11   49.02   59.77
   0  -8  11  -11.17   92.01
   0  -8  11   12.86   56.95
   0  -8 -11   29.56   38.61
   0   8  12  293.89  211.03
   0   9   0   18.74   28.75
   0  -9   0   -0.79   22.34
   0  -9   0   -4.52   42.64
   0  -9   0   53.46   61.23
   0   9   1  580.92  348.13
   0   9  -1  500.98  324.63
   0  -9  -1  687.93  418.33
   0  -9   1  535.94  172.97
   0  -9   1   -0.67   48.65
   0  -9   1  757.51  326.17
   0  -9  -1  633.13  229.60
   0   9   2   38.74   61.58
   0   9  -2   88.18   64.01
   0  -9  -2   -2.02    8.74
   0  -9   2   59.74   54.57
   0  -9   2   10.30   29.80
   0  -9   2   67.70   53.46
   0  -9  -2   25.94   45.23
   0   9   3 2393.30  499.42
   0  -9   3 2926.28  883.06
   0   9  -4   78.70   59.85
   0   9   4   24.07   24.91
   0  -9  -4   16.62   54.43
   0  -9   4    8.69   25.12
   0  -9   4  -17.33   81.25
   0   9  -5  501.79  209.04
   0   9   5  605.92  180.55
   0  -9  -5  401.46  312.79
   0  -9   5  446.95  276.70
   0  -9   5  472.26  241.68
   0   9   6   53.20   85.09
   0   9  -6   44.61   54.42
   0  -9   6   65.90   59.95
   0  -9  -6   68.63   51.11
   0  -9   6   55.48   48.07
   0   9   7  472.71  391.21
   0   9  -7  646.47  347.86
   0  -9   7  493.88  315.09
   0  -9  -7  454.83  355.04
   0  -9   7  409.48  364.90
   0   9   8   38.09   71.77
   0   9  -8  131.78  102.37
   0  -9  -8  143.05  134.87
   0  -9   8   77.09   61.40
   0  -9   8   97.95   57.42
   0   9  -9  264.36  135.69
   0   9   9  158.48   93.58
   0  -9  -9  242.32  240.57
   0  -9   9  220.00  134.42
   0   9  10   72.74   97.97
   0  -9 -10   86.72  114.58
   0  10   0  315.50  203.07
   0 -10   0  473.73  277.73
   0  10  -1  110.85   76.97
   0  10   1  170.12   91.12
   0 -10   1  204.11  131.14
   0 -10  -1  310.29  174.64
   0  10   2  443.76  280.21
   0  10  -2  401.23  203.72
   0 -10  -2  363.04  257.47
   0 -10   2  253.05  212.51
   0 -10   2  374.47  208.83
   0  10   3   16.60   41.89
   0  10  -3   25.43   41.50
   0 -10   3   24.30   56.35
   0 -10  -3  -12.36   61.86
   0 -10   3   27.93   29.58
   0  10   4 3077.13  841.07
   0  10  -4 4397.20  282.16
   0 -10   4 3457.07  638.07
   0 -10  -4 3772.41  326.17
   0 -10   4 3696.27  358.08
   0  10  -5   33.23   50.66
   0  10   5   76.50   74.46
   0 -10  -5   58.67   56.91
   0 -10   5   21.38   41.79
   0 -10   5  -17.27   96.42
   0  10   6  877.71  263.94
   0 -10  -6  673.66  423.29
   0 -10   6  562.14  447.35
   0 -10  -7   20.24   74.72
   0 -10   7   42.11   45.95
   0 -10   8  405.86  344.44
   0 -10  -8  546.59  498.88
   0 -10  -9  133.32  112.12
  -1   0  17   51.82   66.42
  -1   0  16   86.44   96.17
  -1   0  16  217.75  148.30
  -1   0  16  144.38  100.23
  -1   0  15  -14.28   65.37
  -1   0  15   -2.95   61.65
  -1   0  15   -0.61   19.41
  -1   0  14 1178.11  538.77
  -1   0  14 1259.19  390.52
  -1   0  14 1183.23  373.40
  -1   0  14 1464.67  228.49
  -1   0  13   37.51   44.05
  -1   0  13   -7.07   74.32
  -1   0  13   -0.38   30.43
  -1   0  13   13.47   33.22
  -1   0  13  -18.43   32.25
  -1   0  12 1447.13  388.51
  -1   0  12  927.05  339.72
  -1   0  12 1158.91  202.40
  -1   0  12  787.40  508.08
  -1   0  12  981.62  121.61
  -1   0  12 1177.49  255.36
  -1   0  11    2.29   22.15
   1   0 -11    3.03   12.35
  -1   0  11  -11.41   45.92
  -1   0  11   -0.32   20.04
  -1   0  11   29.73   56.08
  -1   0  11   42.35   41.35
  -1   0  10 7691.09  628.99
  -1   0  10 7877.60  647.36
  -1   0  10 6802.84  537.04
  -1   0  10 6476.05  481.24
  -1   0  10 7992.86  653.27
   1   0 -10 6377.23  482.86
  -1   0   9   -3.87   45.71
  -1   0   9   14.42   42.51
  -1   0   9   25.90   32.32
  -1   0   9   57.15   50.03
  -1   0   9   -1.76   12.86
   1   0  -9    8.41   15.91
  -1   0   8 3697.75  329.04
  -1   0   8 4833.16  397.95
  -1   0   8 4137.86  364.39
   1   0  -8 4088.51  333.19
   1   0  -8 4438.75  332.09
  -1   0   8 3666.23  272.46
  -1   0   7    8.44   20.90
   1   0  -7   -2.91   30.93
  -1   0   7   22.70   26.42
   1   0  -7   -0.42   14.79
  -1   0   7    1.35    6.90
  -1   0   7    1.48   21.43
  -1   0   6  222.76  119.53
  -1   0   6  249.93   95.46
  -1   0   6  213.71   87.04
  -1   0   6  233.84   61.96
   1   0  -6  207.93   72.18
   1   0  -6  243.04  101.26
  -1   0   5   25.47   15.28
   1   0  -5    7.18   25.56
  -1   0   5   26.55   23.83
  -1   0   5   25.75   24.49
  -1   0   5   15.63   18.78
   1   0  -5    3.46    8.66
  -1   0   4  251.08  148.15
  -1   0   4  233.37   74.69
   1   0  -4  250.50   94.94
   1   0  -4  219.58   20.82
  -1   0   4  240.17   39.46
   1   0  -3    4.33    4.80
  -1   0   3   11.14   26.35
  -1   0   3   17.39   17.54
   1   0  -3    5.80   20.96
  -1   0   3   10.63   18.32
  -1   0   3   11.21   14.29
   1   0  -2 9579.28  468.44
  -1   0   210748.81  528.21
  -1   0   211597.66  580.42
  -1   0   2 9014.58  440.56
   1   0  -1    9.36   12.31
  -1   0   1   12.03   15.89
   1   0   1    1.47    5.65
   1   0   1    2.33    3.77
   1   0   1   10.50    7.52
   1   0   3    7.03    7.38
  -1   0  -3    6.68    6.85
   1   0   3   21.73   16.80
  -1   0  -3    5.46   17.62
   1   0   3    1.48    5.02
  -1   0  -3    7.93   10.03
   1   0   427930.47 1335.89
  -1   0  -5    8.45   20.13
  -1   0  -5    9.95   14.58
   1   0   5    1.19   15.89
   1   0   5    1.39   10.30
   1   0   5   17.96   20.90
   1   0   5   16.13   16.05
   1   0   6  244.89   92.12
  -1   0  -6  237.44   97.59
   1   0   6  206.35   69.80
   1   0   6  308.02   91.64
   1   0   6  238.11   88.40
   1   0   6  235.43   92.07
  -1   0  -7   25.24   18.80
   1   0   7   11.34   35.18
   1   0   7   17.79   41.10
   1   0   7   11.99   17.02
   1   0   7    3.07   21.57
   1   0   7   14.47   34.24
   1   0   811265.40  841.86
  -1   0  -812099.22  886.91
   1   0   811042.39  824.40
   1   0   9  -10.64   35.71
   1   0   9   32.78   21.55
  -1   0  -9   12.61   24.62
   1   0   9    2.24   14.11
   1   0   9   44.64   29.60
   1   0   9    2.13   26.06
   1   0  10 1621.48  186.93
   1   0  10 1855.37  304.68
   1   0  10 1857.75  194.66
   1   0  10 2037.00  222.28
  -1   0 -10 1682.95  187.26
   1   0  10 1622.97  269.78
  -1   0 -11   -2.08   13.49
   1   0  11   -8.56   53.23
   1   0  11   -1.84   22.36
   1   0  11  -23.04   32.61
   1   0  11    2.67   36.95
   1   0  11   27.91   33.53
   1   0  12 1648.85  386.01
   1   0  12 1859.22  281.97
   1   0  12 1475.59  597.70
  -1   0 -12 1522.28  200.28
   1   0  12 1534.66  195.54
   1   0  13   33.12   25.13
   1   0  13  -13.02   37.17
   1   0  13   -5.07   40.92
   1   0  13   27.33   52.17
   1   0  14 2118.44  313.70
   1   0  14 2336.30  196.23
   1   0  14 2203.70  212.49
   1   0  15    4.81   35.23
   1   0  15  -16.50   69.90
   1   0  15   -2.75   52.51
   1   0  16  662.02  468.99
   1   0  16  457.48  346.87
   1   0  17   -6.70   50.85
   1   0  17    8.67   45.51
  -1   1  17  187.22  117.85
  -1  -1  17   74.60  221.58
  -1  -1  17  172.97  125.71
  -1   1  16   95.96  144.46
  -1   1  16  100.36   95.95
  -1   1  16   71.66   62.58
  -1  -1  16  100.46   80.85
  -1  -1  16   68.59  187.74
  -1  -1  16  135.99  122.14
  -1   1  15  316.57  212.68
  -1   1  15  244.84  178.72
  -1   1  15  192.80  239.45
  -1  -1  15  222.40  245.45
  -1  -1  15  169.00  197.56
  -1   1  14   38.36   43.04
   1   1 -14   98.15   44.73
  -1   1  14   84.27   70.03
  -1  -1  14   36.48   28.15
  -1  -1  14   52.56   53.41
  -1   1  13  678.98  178.57
  -1   1  13  828.72  237.13
   1   1 -13  921.23  249.67
  -1   1  13  830.44  302.26
  -1   1  13  705.39  150.98
  -1   1  13  582.99  488.32
  -1  -1  13  816.11  321.60
  -1  -1  13  625.37  308.94
  -1  -1  13 1079.93  562.72
  -1   1  12  305.38  223.29
  -1   1  12  367.99  270.49
  -1   1  12  392.46  143.55
  -1   1  12  452.06  171.76
   1   1 -12  635.63  203.90
  -1   1  12  453.92  129.59
  -1   1  12  371.96  217.29
  -1  -1  12  348.27  243.41
  -1  -1  12  438.74  306.88
  -1  -1  12  490.41  219.78
  -1  -1  12  405.90  227.48
  -1   1  11 3050.73  221.28
  -1   1  11 2960.96  430.61
  -1   1  11 3482.02  306.92
  -1   1  11 3744.97  226.48
  -1   1  11 2840.88  158.83
  -1   1  11 4123.24  177.61
   1   1 -11 3757.43  166.24
  -1  -1  11 3597.41  181.36
  -1  -1  11 3412.58  263.98
  -1  -1  11 2859.99  211.13
  -1  -1  11 3118.07  219.54
  -1  -1  11 2804.33  286.37
  -1   1  10 1855.00  249.50
  -1   1  10 1772.25  334.04
  -1   1  10 1860.37  258.67
   1   1 -10 2021.21  177.42
  -1   1  10 2272.78  223.40
  -1   1  10 2014.79  297.54
  -1  -1  10 1467.33  175.33
  -1  -1  10 1750.69  277.78
  -1  -1  10 1712.61  291.96
  -1  -1  10 2272.02  265.01
  -1  -1  10 1811.39  205.28
  -1   1   9 1399.55  289.93
  -1   1   9 1533.59  307.71
  -1   1   9 1360.72  115.28
  -1   1   9 1630.24  251.46
  -1   1   9 1447.00  111.63
   1   1  -9 1451.18  114.77
  -1   1   9 1618.33  158.46
  -1  -1   9 1410.56  158.03
  -1  -1   9 1737.68  204.67
  -1  -1   9 1614.14  386.71
  -1  -1   9 1776.09  142.20
   1   1  -8 2104.78  215.54
  -1   1   8 1512.17   90.47
  -1   1   8 1761.93  173.82
  -1   1   8 2095.46  210.04
  -1   1   8 1825.97  179.67
  -1   1   8 1591.25  155.31
   1   1  -8 1940.22  196.38
  -1   1   8 1737.60  171.45
   1   1  -8 1596.60   82.78
  -1  -1   8 2419.02  205.75
  -1  -1   8 1577.75  171.93
  -1  -1   8 1993.84  206.17
   1   1  -7 9626.24  701.89
  -1   1   7 9514.17  694.64
  -1   1   7 8311.93  577.89
  -1   1   7 8571.08  603.96
  -1   1   710356.76  767.84
  -1   1   7 8128.42  578.48
  -1   1   7 9319.16  700.47
   1   1  -7 9258.17  736.97
   1   1  -7 6743.88  470.92
  -1  -1   7 9066.20  683.05
  -1  -1   710990.74  766.22
  -1  -1   7 9833.52  755.80
  -1   1   6  463.39   70.84
   1   1  -6  454.48   61.72
  -1   1   6  402.16   91.14
  -1   1   6  421.76   70.51
  -1   1   6  402.67   47.23
   1   1  -6  285.78   26.93
  -1   1   6  571.26  225.77
   1   1  -6  479.08  165.17
  -1  -1   6  431.34   45.83
  -1  -1   6  506.38  162.23
  -1  -1   6  488.58  202.84
   1  -1  -6  388.81   98.92
   1   1  -5 5548.90  320.35
  -1   1   5 5233.63  272.33
  -1   1   5 6429.39  327.43
   1   1  -5 5321.84  306.23
  -1   1   5 5621.33  331.11
  -1   1   5 5309.79  298.44
   1  -1  -5 5265.41  285.07
  -1  -1   5 5061.30  296.75
  -1  -1   5 6226.00  318.38
  -1  -1   5 5736.71  333.06
   1  -1  -5 5905.74  347.91
   1   1  -4 5885.94  324.78
   1   1  -4 5833.69  326.36
  -1   1   4 5369.24  270.71
  -1   1   4 6043.28  341.98
  -1   1   4 5101.79  276.31
  -1   1   4 5719.47  286.43
  -1  -1   4 6670.80  334.59
   1  -1  -4 5761.36  300.12
  -1  -1   4 5347.98  300.52
  -1  -1   4 5927.85  330.56
   1  -1  -4 5626.42  317.76
   1   1  -1 6739.16  328.18
   1   1  -1 5557.70  289.48
  -1   1   1 6859.43  332.41
   1   1  -1 6630.67  335.72
  -1   1   1 6882.75  354.93
   1  -1  -1 6718.73  342.79
  -1  -1   1 6819.51  332.51
   1  -1  -1 6916.06  334.37
  -1  -1   1 6729.33  342.23
   1   1   0 1725.38  102.67
  -1   1   0 1781.83  107.81
   1   1   0 1786.69   97.68
  -1   1   0 1718.47   92.34
  -1   1   0 1591.81   86.89
   1   1   0 1762.12  101.95
  -1  -1   0 1695.49  102.87
   1  -1   0 1758.24  107.54
   1  -1   0 1615.08   89.18
  -1  -1   0 1574.94   91.78
  -1  -1   0 1668.55   93.07
   1  -1   0 1625.88   95.10
   1   1   110043.59  489.72
   1   1   111021.46  530.33
  -1   1  -111592.16  555.39
  -1   1  -114161.74  683.90
  -1   1  -111174.18  548.06
   1  -1   1 9923.15  480.21
   1  -1   110947.90  535.36
  -1  -1  -111219.90  542.15
   1  -1   111738.36  562.59
   1   1   2   75.05   27.15
  -1   1  -2   12.90   17.16
  -1   1  -2   28.46   10.90
   1   1   2   36.11   14.62
  -1   1  -2   30.86   14.04
   1   1   2   44.54   17.14
  -1  -1  -2   45.58   20.23
   1  -1   2   33.96   13.25
   1  -1   2   28.28   16.08
  -1  -1  -2   34.80   19.60
   1  -1   2   55.55   28.97
  -1  -1  -2   57.88   19.60
   1   1   3 8682.57  426.22
   1   1   3 9231.02  452.84
   1   1   3 8960.65  446.76
  -1   1  -3 7486.94  365.39
  -1   1  -3 9252.15  466.56
   1   1   3 8425.25  420.34
   1  -1   311458.50  579.45
   1  -1   3 8648.52  439.20
  -1  -1  -3 8872.40  435.43
  -1  -1  -3 9186.31  455.38
   1  -1   3 8510.94  416.11
   1  -1   3 8474.32  429.15
   1   1   4  104.51   27.69
   1   1   4  116.94   45.04
   1   1   4   73.46   29.94
  -1   1  -4  112.65   61.16
   1   1   4  129.13   36.80
  -1   1  -4  184.00   74.45
  -1  -1  -4   81.81   47.49
   1  -1   4   46.94   22.10
  -1  -1  -4   66.11   28.00
   1  -1   4   81.64   34.82
   1  -1   4   78.81   31.30
   1  -1   4   93.49   46.45
   1   1   5 3025.89  180.39
  -1   1  -5 3508.75  211.40
   1   1   5 3240.05  188.29
   1   1   5 3799.94  211.14
   1   1   5 3190.18  193.49
   1   1   5 3265.81  196.75
   1   1   5 3249.66  189.21
   1  -1   5 3602.38  227.83
   1  -1   5 3616.31  220.69
   1  -1   5 2801.47  158.63
   1  -1   5 3252.97  211.61
   1   1   6 2739.61  165.78
   1   1   6 2567.68  164.68
   1   1   6 2625.74  178.14
   1   1   6 2777.12  177.85
   1   1   6 2852.97  184.44
   1   1   6 2753.76  169.16
  -1   1  -6 2799.51  180.40
   1  -1   6 2620.84  188.44
   1  -1   6 2550.01  174.03
   1  -1   6 3328.74  227.62
   1  -1   6 2439.75  141.10
  -1   1  -7 5215.21  373.70
   1   1   7 6246.63  459.20
  -1   1  -7 6420.97  476.90
   1   1   7 7090.28  525.49
   1   1   7 6581.36  486.46
   1   1   7 6628.92  488.56
   1   1   7 5960.24  425.03
   1   1   7 6824.87  512.86
   1  -1   7 5861.63  421.10
   1  -1   7 8748.20  659.63
   1  -1   7 6579.87  491.65
   1  -1   7 6988.65  532.99
  -1   1  -8    4.78   17.69
   1   1   8    7.55   10.67
  -1   1  -8   29.77   36.19
   1   1   8   -1.42   40.77
   1   1   8    9.25   33.44
   1   1   8   -1.35   17.19
   1   1   8   -5.38   25.37
   1   1   8    2.80   17.71
   1  -1   8   15.07   15.71
   1  -1   8   30.30   43.16
   1  -1   8  -10.35   32.37
   1  -1   8   21.34   33.02
  -1   1  -9 7621.43  601.48
   1   1   9 7426.01  603.35
   1   1   9 7639.52  625.80
   1   1   9 8237.64  696.58
   1   1   9 8888.37  727.34
  -1   1  -9 7320.93  604.52
   1   1   9 6477.93  509.02
   1   1   9 7497.12  601.70
   1  -1   9 7696.32  612.00
   1  -1   9 7469.40  650.01
   1  -1   9 8816.11  736.45
   1  -1   9 7380.05  607.32
  -1   1 -10  576.81  224.70
   1   1  10  526.87  256.95
   1   1  10  531.50  273.56
   1   1  10  546.19  186.72
   1   1  10  537.39  204.63
   1   1  10  493.21  170.65
   1   1  10  495.03  178.22
   1  -1  10  494.53  171.74
   1  -1  10  473.66  301.76
   1  -1  10  404.00  214.31
   1  -1  10  447.02  283.00
   1   1  11 3271.27  195.77
   1   1  11 3001.45  175.57
   1   1  11 3119.11  284.01
   1   1  11 3361.91  207.25
  -1   1 -11 3868.20  184.38
   1   1  11 3717.67  229.28
   1  -1  11 3355.02  203.39
   1  -1  11 3402.78  161.26
   1  -1  11 3511.83  240.98
   1  -1  11 2796.09  263.69
   1  -1  11 3202.42  477.94
   1   1  12   90.28   59.06
   1   1  12   72.95   46.09
   1   1  12   83.28   44.98
   1   1  12   99.96   57.44
  -1   1 -12  170.03   78.44
   1   1  12   88.00   71.23
   1   1  12  167.44   62.06
   1  -1  12   91.04   82.99
   1  -1  12  106.71   63.28
   1  -1  12   53.20   43.59
   1  -1  12  101.03   52.60
   1   1  13 2497.51  269.60
   1   1  13 2497.59  388.53
  -1   1 -13 2733.66  276.35
   1   1  13 2604.57  437.14
   1   1  13 2559.30  546.53
   1  -1  13 2889.50  320.39
   1  -1  13 2313.36  342.77
   1  -1  13 2527.18  316.17
   1   1  14  132.61   89.48
  -1   1 -14  142.92   60.69
   1   1  14  128.33  150.03
   1   1  14  163.49   85.78
   1  -1  14  102.69   61.26
   1  -1  14   87.11   82.94
   1   1  15  391.07  432.50
   1   1  15  619.82  148.89
  -1   1 -15  514.01  189.36
   1   1  15  479.70  392.60
   1  -1  15  402.52  246.33
   1  -1  15  648.66  243.21
   1   1  16   57.07   80.80
   1   1  16   65.46   56.26
   1  -1  16  -19.69   67.59
   1  -1  16   34.60   50.31
   1  -1  16   91.33   92.39
   1   1  17  206.31  211.22
   1   1  17  138.98  117.51
   1  -1  17  163.26  124.08
  -1  -2  17   13.61   52.98
  -1   2  16  259.81  463.32
   1   2 -16  491.09  318.66
  -1   2  16  376.99  366.32
  -1  -2  16  744.70  219.13
  -1  -2  16  581.05  440.07
  -1   2  15   23.36   35.24
  -1   2  15   33.63   50.62
   1   2 -15    4.95   22.23
  -1   2  15   10.63   22.35
  -1  -2  15   32.27   32.57
  -1  -2  15   54.26   65.83
  -1   2  14  742.48  199.18
  -1   2  14  459.86  300.41
   1   2 -14  664.40  299.33
  -1   2  14  508.13  420.02
  -1  -2  14  792.16  486.36
  -1  -2  14  597.16  355.60
  -1   2  13  108.37   77.51
  -1   2  13  115.04  128.37
  -1   2  13  141.48  101.80
  -1   2  13  123.86   63.89
  -1   2  13  235.03  131.07
   1   2 -13  201.93  102.20
  -1  -2  13  157.88   88.99
  -1  -2  13   93.89   84.34
  -1  -2  13  151.80  111.68
  -1   2  12 1863.40  268.30
  -1   2  12 1646.06  318.75
  -1   2  12 1342.46  721.47
  -1   2  12 1567.20  225.47
  -1   2  12 2075.74  262.72
  -1   2  12 1684.51  397.40
   1   2 -12 1980.11  463.06
  -1  -2  12 1695.89  280.92
  -1  -2  12 2246.29  296.07
  -1  -2  12 1762.24  313.40
   1   2 -11   -7.29   50.52
  -1   2  11    5.18   22.73
  -1   2  11   29.57   25.47
  -1   2  11   16.51   28.68
   1   2 -11   11.84   13.23
  -1   2  11    1.16   12.51
  -1   2  11   21.08   18.55
  -1   2  11    6.65   21.76
  -1  -2  11   -6.23   40.46
  -1  -2  11   21.69   17.61
  -1  -2  11   25.66   36.63
  -1   2  10  501.08  248.92
  -1   2  10  530.25  124.67
   1   2 -10  564.08  236.47
  -1   2  10  655.61  124.80
  -1   2  10  639.16  254.01
  -1   2  10  690.94  173.66
   1   2 -10  601.53  188.38
  -1   2  10  493.62  368.73
  -1  -2  10  538.78  176.84
  -1  -2  10  520.72  248.57
  -1  -2  10  744.35  167.79
  -1  -2  10  609.72  268.99
   1   2  -9  193.59  105.50
  -1   2   9  262.69   86.27
  -1   2   9  187.04   85.71
  -1   2   9  248.53  100.63
  -1   2   9  147.58   85.91
   1   2  -9  259.70   90.83
  -1   2   9  157.81   87.83
   1   2  -9  192.08   71.07
  -1   2   9  189.51   57.94
  -1  -2   9  201.83   53.52
  -1  -2   9  182.07   77.68
  -1  -2   9  280.27  115.11
   1   2  -8 1039.94  278.57
   1   2  -8 1208.37  439.75
  -1   2   8 1213.17  139.46
  -1   2   8 1078.98  167.94
  -1   2   8 1268.97  194.87
  -1   2   8 1150.72  123.44
   1   2  -8 1134.73   95.06
  -1   2   8 1329.83  131.11
  -1  -2   8 1164.98  216.08
   1  -2  -8 1309.10  156.75
  -1  -2   8 1170.37  442.07
  -1  -2   8 1434.34  133.98
   1   2  -7   81.37   42.90
   1   2  -7   94.99   50.15
   1   2  -7  150.99   52.80
  -1   2   7  139.59   38.14
  -1   2   7   99.48   43.48
  -1   2   7  131.43   41.86
  -1   2   7   93.75   48.92
  -1  -2   7   83.13   51.99
  -1  -2   7   83.72   46.14
  -1  -2   7  103.22   64.45
   1  -2  -7   57.20   22.91
  -1   2   6 6952.79  399.13
   1   2  -6 4994.61  252.94
  -1   2   6 6430.19  325.33
  -1   2   6 5729.82  302.31
  -1   2   6 5774.22  300.29
   1   2  -6 6321.43  368.01
   1   2  -6 7283.63  415.68
  -1   2   6 6308.02  327.63
  -1  -2   6 6213.94  364.69
  -1  -2   6 7179.28  370.26
   1  -2  -6 6482.50  379.23
  -1  -2   6 6649.18  390.29
   1   2  -5   61.66   31.86
  -1   2   5   58.05   26.84
  -1   2   5   67.02   36.47
   1   2  -5   67.56   56.40
  -1   2   5  106.88   37.61
  -1   2   5   96.47   34.10
   1   2  -5   80.01   36.82
  -1  -2   5   77.28   39.37
   1  -2  -5  108.62   42.72
   1  -2  -5  100.64   33.93
  -1  -2   5   84.18   20.95
  -1  -2   5   76.58   41.77
   1   2  -434923.01 1364.81
   1   2  -436691.66 1436.76
  -1   2   433782.93 1636.20
   1   2  -436963.96 1397.63
   1  -2  -434549.36 1674.84
  -1  -2   433695.09 1632.06
  -1  -2   435199.67 1379.59
  -1   2   336522.62 1411.78
  -1  -2   343984.94 1707.09
  -1  -2   335452.86 1367.43
  -1   2   2  122.60   45.38
   1   2  -2  154.86   50.28
  -1   2   2  135.07   66.37
   1   2  -2   86.81   19.68
   1   2  -2  157.82   58.38
   1  -2  -2  142.35   75.04
  -1  -2   2  120.81   46.69
   1  -2  -2  117.26   41.62
  -1  -2   2  141.46   63.05
  -1  -2   2  184.79   73.32
  -1   2   1  654.86   24.72
  -1   2   1  894.59  103.10
   1   2  -1  709.26   50.61
  -1   2   1  808.61   59.81
   1   2  -1  817.36   64.87
   1   2  -1  790.16   53.22
   1  -2  -1  848.08   49.63
  -1  -2   1  793.95   57.28
  -1  -2   1  773.05   63.41
   1  -2  -1  749.50   30.26
   1  -2  -1  771.00   64.42
  -1  -2   1  716.66  117.35
   1   2   017667.56  861.22
   1   2   014017.53  675.25
  -1   2   016793.27  806.26
   1   2   016961.62  817.44
  -1   2   018436.67  907.07
   1  -2   017432.46  838.56
  -1  -2   015423.72  744.25
   1  -2   017830.38  903.54
  -1  -2   016922.64  813.44
  -1  -2   017262.83  840.61
   1   2   1 9536.07  481.99
   1   2   1 8502.63  420.61
  -1   2  -1 8430.04  418.24
  -1   2  -1 9193.90  474.74
   1   2   1 8513.23  429.77
  -1  -2  -1 9053.33  466.83
   1  -2   1 8844.66  438.88
  -1  -2  -1 9481.07  471.51
  -1  -2  -1 9267.94  465.39
   1  -2   1 8957.29  462.09
   1  -2   1 8508.07  422.91
  -1   2  -2 4804.82  254.33
  -1   2  -2 4505.81  257.36
   1   2   2 4582.43  250.40
   1   2   2 4541.32  247.62
   1   2   2 4574.39  240.02
   1  -2   2 4521.62  249.49
   1  -2   2 4271.03  247.42
  -1  -2  -2 4961.38  270.04
  -1  -2  -2 4550.45  246.66
  -1  -2  -2 4832.24  247.72
   1  -2   2 4372.91  236.67
   1  -2   2 4735.91  250.58
  -1   2  -3  563.02  138.57
   1   2   3  419.36   57.10
   1   2   3  429.82   43.22
  -1   2  -3  430.39   58.36
   1   2   3  453.48   39.40
  -1  -2  -3  413.17   44.92
   1  -2   3  491.77  163.72
   1  -2   3  549.59  175.67
  -1  -2  -3  471.35   50.99
   1  -2   3  385.85  148.97
   1  -2   3  465.94   45.75
  -1  -2  -3  462.90   39.89
   1   2   417095.24  836.20
   1   2   416523.77  808.39
  -1   2  -413835.13  668.96
   1   2   416949.12  819.73
  -1   2  -417044.05  853.27
  -1  -2  -417406.20  864.21
   1  -2   418099.46  902.39
   1  -2   416611.38  834.50
  -1  -2  -417526.10  861.63
  -1  -2  -420048.95  961.19
   1  -2   418795.95  914.37
   1  -2   414739.74  734.17
  -1   2  -5 9491.48  517.52
   1   2   5 8728.20  444.87
   1   2   5 8590.39  436.07
   1   2   5 7798.59  390.65
   1   2   5 8772.56  432.42
   1   2   5 9179.31  455.90
   1  -2   5 9256.63  495.03
   1  -2   510443.74  534.93
   1  -2   5 8528.22  454.80
   1  -2   5 7955.60  419.62
  -1  -2  -5 8925.66  458.94
   1   2   619625.42 1354.73
   1   2   623253.77  322.79
  -1   2  -622040.58  450.08
   1   2   620234.16 1392.48
   1   2   618757.11 1295.68
   1   2   620026.32 1385.81
  -1  -2  -620777.13 1444.08
   1  -2   620836.08 1463.89
   1  -2   619428.57 1365.25
   1  -2   618050.28 1263.77
   1  -2   624288.67  365.93
   1   2   7   20.45   21.20
  -1   2  -7   24.40   22.81
   1   2   7   13.83   18.79
   1   2   7   -2.99   26.70
  -1   2  -7   32.59   37.88
   1   2   7   56.23   27.02
   1   2   7   13.53   15.52
   1  -2   7   24.97   28.03
   1  -2   7   21.35   21.37
   1  -2   7   46.11   58.99
  -1  -2  -7   10.14   26.32
   1  -2   7   39.03   45.61
   1   2   8 2678.86  250.06
  -1   2  -8 1785.39  131.73
   1   2   8 2143.74  186.37
   1   2   8 2496.69  198.57
  -1   2  -8 2390.74  207.32
   1   2   8 2646.57  208.94
   1   2   8 2430.26  191.65
   1   2   8 2617.58  215.23
   1  -2   8 2539.13  234.65
   1  -2   8 2393.82  269.56
   1  -2   8 2999.84  224.54
   1  -2   8 3202.95  326.81
   1   2   9   17.70   25.68
  -1   2  -9   26.28   18.91
   1   2   9   -3.02   35.15
   1   2   9   39.99   51.30
   1   2   9    8.59   19.61
   1   2   9    9.98   24.12
  -1   2  -9   33.41   40.40
   1   2   9   63.87   36.77
   1  -2   9   52.60   36.46
   1  -2   9   26.82   28.97
   1  -2   9   80.00   39.74
   1  -2   9   40.83   72.37
   1   2  10 3451.08  286.21
  -1   2 -10 3634.67  309.92
   1   2  10 2838.45  214.58
  -1   2 -10 2677.28  210.93
   1   2  10 3065.46  261.57
   1   2  10 3843.20  317.41
   1   2  10 3128.14  249.29
   1   2  10 3421.32  298.40
   1  -2  10 3673.07  337.71
   1  -2  10 3031.24  316.16
   1  -2  10 3105.57  321.39
   1  -2  10 4046.84  315.15
   1   2  11  114.60  104.13
   1   2  11   80.84   57.95
   1   2  11  114.17   45.53
  -1   2 -11  140.19   63.53
   1   2  11  100.20   74.93
  -1   2 -11  135.40   62.50
   1   2  11   90.56   42.60
   1   2  11   85.14   38.92
   1  -2  11   60.55   37.18
   1  -2  11  104.60   41.81
   1  -2  11  131.24   77.45
   1   2  12 1375.80  194.06
  -1   2 -12 1920.36  281.33
   1   2  12 1495.70  288.59
   1   2  12 1828.69  381.37
   1   2  12 1513.12  288.32
  -1   2 -12 1680.79  223.40
   1   2  12 1684.73  353.79
   1   2  12 1638.76  242.32
   1  -2  12 1647.05  285.76
   1  -2  12 1670.55  518.16
   1   2  13   81.74   64.68
   1   2  13   19.15   39.00
   1   2  13   71.78   57.33
  -1   2 -13  117.86   51.22
   1   2  13   22.40   30.23
   1   2  13   56.79   63.37
   1  -2  13   46.39   40.14
   1  -2  13   33.10   42.56
   1  -2  13   53.24   56.69
  -1   2 -14  168.33   64.66
   1   2  14  133.55   71.09
   1   2  14   30.49   86.90
   1   2  14  149.66  113.68
   1  -2  14  211.00  134.76
   1  -2  14   66.78   48.30
  -1   2 -15   47.95   33.90
   1   2  15   53.13   57.89
   1   2  15   33.49   50.99
   1   2  15   45.28   35.47
   1  -2  15   67.17   69.22
   1  -2  15   54.37   56.75
   1   2  16  208.24  229.77
   1   2  16  195.18  246.44
  -1   2 -16  227.06  148.41
   1  -2  16  195.51  116.95
   1  -2  16  107.47  176.54
  -1   2 -17   47.39   45.52
   1   3 -16    8.47   27.21
  -1  -3  16   39.64   37.75
  -1   3  15  395.57  428.58
  -1   3  15  224.10  417.35
  -1   3  15  492.34  155.92
   1   3 -15  577.47  344.15
  -1  -3  15  273.21  470.76
  -1  -3  15  502.81  313.44
  -1   3  14   43.80   52.16
  -1   3  14   34.41   60.10
   1   3 -14   38.57   43.42
  -1   3  14   18.25   43.94
  -1  -3  14   56.26   45.28
  -1  -3  14   29.63   57.91
  -1   3  13  666.19  209.40
   1   3 -13  628.60  250.28
  -1   3  13  379.99  442.91
  -1   3  13  406.32  276.38
  -1   3  13  631.64  193.27
  -1   3  13  373.56  186.34
  -1   3  13  448.75  307.98
  -1  -3  13  520.63  383.00
  -1  -3  13  752.68  466.11
  -1   3  12   14.83   34.96
  -1   3  12   -0.02   34.91
  -1   3  12   41.16   28.77
  -1   3  12  -11.77   57.23
   1   3 -12   10.76   14.77
  -1   3  12  -30.83   66.44
  -1   3  12   17.05   14.88
  -1  -3  12   28.02   27.73
  -1  -3  12   -4.00   43.27
  -1  -3  12   27.89   53.23
  -1   3  11  391.32  261.26
  -1   3  11  470.27  238.17
   1   3 -11  399.65  133.16
  -1   3  11  391.06  141.81
  -1   3  11  441.47  219.21
  -1   3  11  450.21  218.46
  -1   3  11  381.38  257.23
  -1  -3  11  574.13  195.00
  -1  -3  11  441.33  193.37
  -1  -3  11  412.95  232.82
  -1   3  10  282.74  108.88
   1   3 -10  225.27   92.85
  -1   3  10  308.32  128.95
  -1   3  10  252.11  152.00
   1   3 -10  287.34  158.65
  -1   3  10  304.45  139.20
  -1   3  10  210.11  105.94
  -1  -3  10  291.95  155.53
  -1  -3  10  260.98  144.75
  -1  -3  10  204.69   63.74
  -1   3   9 5044.25  396.77
  -1   3   9 4778.35  502.22
  -1   3   9 6337.07  492.83
   1   3  -9 5109.47  457.86
  -1   3   9 4061.70  334.83
   1   3  -9 4669.75  406.43
  -1   3   9 4926.69  413.78
  -1  -3   9 4717.75  380.05
   1  -3  -9 5040.42  447.21
  -1  -3   9 4707.32  423.34
  -1  -3   9 4505.39  421.88
  -1   3   8   50.54   27.84
  -1   3   8   64.30   26.16
  -1   3   8   55.41   28.71
   1   3  -8   87.01   44.57
  -1   3   8  109.42   45.74
   1   3  -8   48.79   36.90
  -1   3   8   49.95   33.31
   1   3  -8   43.72   31.54
  -1  -3   8  103.79   46.91
  -1  -3   8   48.15   44.38
   1  -3  -8  124.66   45.18
  -1  -3   8   56.83   52.40
  -1   3   7 3388.40  297.81
   1   3  -7 2540.78  204.35
   1   3  -7 3340.50  349.02
  -1   3   7 2849.12  223.64
  -1   3   7 3364.15  261.76
  -1   3   7 2775.88  220.88
   1   3  -7 3340.66  303.77
  -1   3   7 3239.59  260.41
  -1  -3   7 3426.94  282.54
  -1  -3   7 3032.40  308.33
   1  -3  -7 3274.10  296.31
  -1  -3   7 3383.38  369.09
   1   3  -6 3162.75  283.77
  -1   3   6 3071.51  252.32
  -1   3   6 5128.86  383.22
  -1   3   6 3665.63  327.11
  -1   3   6 3471.28  252.84
   1   3  -6 4161.76  375.03
   1   3  -6 3118.44  239.62
   1  -3  -6 3142.06  296.50
  -1  -3   6 3187.81  413.74
  -1  -3   6 3362.93  268.12
  -1  -3   6 3401.53  297.42
   1  -3  -6 3122.48  249.58
  -1   3   517045.09  856.69
  -1   3   514640.27  688.64
  -1   3   515483.14  758.74
   1   3  -517901.32  949.78
  -1   3   516843.64  781.83
   1   3  -518188.76  872.34
   1   3  -516386.18  831.28
  -1  -3   516515.69  800.40
  -1  -3   517103.52  892.20
   1  -3  -517400.74  832.78
   1  -3  -516439.90  928.55
  -1  -3   516334.32  831.25
  -1   3   4    7.22   25.22
   1   3  -4   26.21   48.24
   1   3  -4   14.57   22.58
  -1   3   4   29.77   32.11
   1   3  -4   13.39   18.16
   1  -3  -4   24.03   44.01
   1  -3  -4   13.75   21.07
  -1  -3   4   35.18   29.62
  -1  -3   4  120.49   51.01
  -1  -3   4   13.32   12.52
   1   3  -3   52.31   28.23
  -1   3   3   92.09   39.40
  -1   3   3   82.98   48.90
   1   3  -3  111.59   43.97
   1   3  -3   60.64   27.69
  -1  -3   3   80.67   35.53
   1  -3  -3   47.77   32.04
  -1  -3   3  137.78   51.98
   1  -3  -3  116.83   45.44
  -1  -3   3   59.84   22.22
   1   3  -2 1676.68  142.21
   1   3  -2 1291.25  113.33
  -1   3   2 1534.31  127.91
  -1   3   2 1474.42  139.66
   1   3  -2 1460.31  148.99
  -1  -3   2 1224.67   98.22
   1  -3  -2 1309.59  117.05
  -1  -3   2 1462.13  135.10
  -1  -3   2 1454.65  127.05
   1  -3  -2 1413.78  161.73
   1   3  -1 6218.88  334.58
   1   3  -1 6079.80  380.94
  -1   3   1 5852.08  314.03
   1   3  -1 6004.92  332.12
  -1   3   1 6195.26  351.58
   1  -3  -1 6123.97  367.14
  -1  -3   1 6157.93  332.83
   1  -3  -1 6196.06  306.40
  -1  -3   1 5643.76  324.54
   1  -3  -1 6518.38  323.30
  -1  -3   1 5508.72  299.35
   1  -3  -1 6275.48  338.76
  -1   3   0  128.91   62.19
   1   3   0  105.94   39.25
   1   3   0  143.04   50.73
  -1   3   0   95.51   45.85
   1   3   0   78.25   33.40
   1  -3   0  107.16   40.11
  -1  -3   0  103.87   54.74
   1  -3   0  145.29   55.99
  -1  -3   0   37.04   15.65
   1  -3   0  101.58   39.51
  -1  -3   0  109.90   39.28
   1  -3   0  113.27   46.63
  -1   3  -1  940.33  222.85
   1   3   1  921.85   79.00
   1   3   1  775.09   44.26
  -1   3  -1  820.83   69.56
   1   3   1  852.25   65.24
  -1  -3  -1  934.14  139.30
  -1  -3  -1  918.35   64.96
  -1  -3  -1  892.96   62.01
   1  -3   1  889.25   83.93
   1  -3   1  959.34   71.88
   1  -3   1  929.77   65.86
   1  -3   1  935.30   85.92
   1   3   2 2338.86  132.29
   1   3   2 2790.51  192.36
  -1   3  -2 2574.73  162.68
   1   3   2 2705.85  169.65
  -1   3  -2 2756.21  193.95
   1  -3   2 2391.70  148.34
   1  -3   2 2431.11  186.85
  -1  -3  -2 2756.93  182.06
  -1  -3  -2 2805.01  160.47
   1  -3   2 2763.59  184.67
  -1  -3  -2 2726.61  171.09
   1  -3   2 2647.92  165.34
  -1   3  -3 3074.01  186.36
   1   3   3 3069.85  195.46
  -1   3  -3 3030.39  230.80
   1   3   3 2809.02  175.75
   1   3   3 3189.73  177.97
   1  -3   3 2635.57  167.79
   1  -3   3 3315.51  213.79
  -1  -3  -3 3164.24  191.60
  -1  -3  -3 2843.40  185.45
  -1  -3  -3 3030.37  159.95
   1  -3   3 2784.66  181.07
   1  -3   3 2825.74  202.74
   1   3   4 6642.76  358.76
   1   3   4 6254.61  322.85
  -1   3  -4 6561.06  342.83
  -1   3  -4 7630.72  487.20
   1   3   4 6001.92  329.38
   1  -3   4 6907.76  389.53
  -1  -3  -4 6595.82  350.76
  -1  -3  -4 6676.12  324.11
   1  -3   4 5380.96  319.47
   1  -3   4 6042.52  349.36
   1  -3   4 6115.45  329.45
  -1  -3  -4 6390.58  363.19
   1   3   5 5007.17  354.69
   1   3   5 5384.76  394.78
  -1   3  -5 5386.58  454.02
   1   3   5 5416.71  407.74
   1   3   5 5084.87  382.33
  -1   3  -5 4626.05  338.93
   1  -3   5 5497.66  411.20
   1  -3   5 4403.19  341.34
   1  -3   5 5191.98  448.56
  -1  -3  -5 5505.03  406.20
   1  -3   5 5425.25  429.64
  -1  -3  -5 5173.47  400.49
   1   3   6  154.73   65.60
   1   3   6  115.61   38.46
  -1   3  -6   78.14   40.70
  -1   3  -6   96.14   41.24
   1   3   6  117.72   44.23
   1   3   6  161.71   61.20
   1  -3   6  148.03   51.49
   1  -3   6  152.56   63.88
  -1  -3  -6  108.83   50.38
   1  -3   6  150.62   52.45
   1  -3   6  113.38   36.32
  -1  -3  -6  131.93   55.91
   1   3   7 2278.35  211.82
  -1   3  -7 1682.67  143.53
   1   3   7 2136.68  232.81
   1   3   7 2275.40  202.49
   1   3   7 2427.95  201.02
   1   3   7 2205.83  188.47
  -1   3  -7 2660.48  254.50
  -1  -3  -7 2148.55  214.90
   1  -3   7 2299.97  209.00
   1  -3   7 2130.02  224.43
   1  -3   7 2385.58  577.25
   1  -3   7 1980.71  203.04
   1   3   8   29.75   15.91
   1   3   8   21.24   26.77
  -1   3  -8   57.04   81.70
   1   3   8   33.02   22.43
   1   3   8   22.66   19.96
   1   3   8   21.21   14.71
  -1   3  -8   31.37   54.14
  -1  -3  -8   19.13   26.20
   1  -3   8   35.70   51.40
   1  -3   8   25.59   24.76
   1  -3   8   50.73   53.74
  -1   3  -9  167.44  138.45
   1   3   9  217.48   84.52
   1   3   9  203.12  105.66
   1   3   9  181.95  118.86
  -1   3  -9  287.39  122.99
   1   3   9  256.45  122.82
   1   3   9  282.50  118.70
   1  -3   9  210.88   99.72
   1  -3   9  188.38  120.91
  -1  -3  -9  238.15  114.03
   1  -3   9  343.35  138.91
   1  -3   9  216.87   97.78
   1   3  10    7.96   17.71
  -1   3 -10   -1.83   46.63
  -1   3 -10    5.23   16.18
   1   3  10   15.19   15.17
   1   3  10   -3.58   38.40
   1   3  10   10.69   18.54
   1   3  10   -6.90   31.92
   1   3  10   17.01   21.42
   1  -3  10   -8.50   37.37
   1  -3  10  -12.79   50.62
   1  -3  10   -9.43   50.46
   1   3  11 1713.44  219.34
  -1   3 -11 1246.28  162.94
  -1   3 -11 1897.10  291.45
   1   3  11 1352.47  342.27
   1   3  11 1821.97  253.89
   1   3  11 1406.81  210.33
   1   3  11 1747.10  317.40
   1   3  11 1663.91  381.90
   1  -3  11 1675.95  532.73
   1  -3  11 1497.77  241.02
   1  -3  11 1847.67  251.55
   1   3  12  139.72  107.75
   1   3  12  111.26   71.52
  -1   3 -12  114.41   54.46
   1   3  12  114.29  114.69
   1   3  12   91.57   75.43
   1   3  12  130.40   81.01
   1  -3  12  137.72   90.15
   1  -3  12  114.18  119.14
  -1   3 -13  324.01  104.97
   1   3  13  251.83  144.89
   1   3  13  294.37  211.06
   1   3  13  182.95  201.99
   1   3  13  185.69  174.14
   1  -3  13  145.36  149.70
   1  -3  13  272.86  100.35
   1   3  14   48.46   39.94
   1   3  14   73.74   71.90
   1   3  14   37.14   46.77
  -1   3 -14  177.37   96.68
   1  -3  14   68.32   67.13
   1  -3  14   55.01   44.16
  -1   3 -15 1043.71  375.55
   1   3  15  890.07  274.58
   1   3  15 1010.33  253.46
   1  -3  15  717.25  411.08
   1  -3  15  457.75  593.76
  -1   3 -16   18.39   32.49
   1   3  16   41.42   44.55
   1  -3  16   50.17   34.83
  -1   3 -17  419.74  313.09
  -1  -4  16  456.49  443.68
   1   4 -15   45.32   36.42
  -1   4  15   25.13   51.42
  -1   4  15   24.81   46.50
  -1  -4  15   89.33   46.05
  -1  -4  15   70.18   67.93
   1   4 -14  640.10  268.34
  -1   4  14  697.53  227.32
  -1   4  14  369.62  475.37
  -1  -4  14  964.25  505.88
  -1  -4  14  557.00  455.45
  -1   4  13    4.76   26.98
  -1   4  13   50.87   49.84
  -1   4  13   12.94   20.85
   1   4 -13   18.85   16.04
  -1  -4  13   33.41   28.06
  -1  -4  13   23.63   33.19
  -1   4  12  387.18  233.67
  -1   4  12  512.07  232.37
  -1   4  12  645.20  138.45
  -1   4  12  499.27  252.40
   1   4 -12  548.53  167.85
  -1   4  12  765.45  221.36
  -1   4  12  532.66  317.30
  -1  -4  12  644.14  424.19
  -1  -4  12  725.45  347.74
  -1   4  11  100.03   58.00
  -1   4  11   90.47   46.83
  -1   4  11   50.87   99.06
  -1   4  11   68.50   63.87
   1   4 -11  128.24   58.20
  -1   4  11   93.11   85.26
  -1  -4  11   85.65   65.40
   1  -4 -11  124.08   93.04
  -1  -4  11   96.01   85.91
  -1  -4  11   75.07   42.08
   1   4 -10  454.80  189.02
  -1   4  10  269.08  267.66
  -1   4  10  393.06  116.04
  -1   4  10  411.71  204.65
  -1   4  10  386.97  119.21
  -1   4  10  259.26  161.13
  -1  -4  10  452.80   83.37
  -1  -4  10  359.26  129.64
   1  -4 -10  374.08  160.88
  -1  -4  10  376.20  133.68
   1   4  -9   25.83   54.79
  -1   4   9   70.87   30.91
   1   4  -9   68.14   22.33
  -1   4   9   60.95   34.68
  -1   4   9   98.53   60.63
  -1   4   9   63.98   38.15
  -1   4   9   73.30   35.34
  -1  -4   9  117.24   40.87
   1  -4  -9   71.98   49.65
  -1  -4   9   46.05   51.04
  -1   4   8 2208.11  184.90
  -1   4   8 2596.26  259.77
  -1   4   8 2503.00  200.37
   1   4  -8 2917.72  296.67
   1   4  -8 2593.69  641.10
  -1   4   8 2273.52  226.55
   1   4  -8 1990.57  172.10
  -1  -4   8 2880.00  309.96
   1  -4  -8 2330.95  272.11
  -1  -4   8 2639.72  264.14
  -1  -4   8 2631.64  273.45
   1   4  -7  934.98  291.58
  -1   4   7  795.58   76.47
   1   4  -7 1238.81  183.37
  -1   4   7  973.73  116.48
  -1   4   7  848.17   95.79
  -1   4   7 1160.68  176.64
   1   4  -7  896.19   99.51
   1  -4  -7  978.59  395.11
  -1  -4   7  973.49  453.82
   1  -4  -7 1113.96  243.25
  -1  -4   7  981.87  404.21
  -1  -4   7  950.98  128.13
   1   4  -6 3679.03  301.65
   1   4  -6 4042.86  287.40
   1   4  -6 3465.97  298.85
  -1   4   6 3449.54  258.95
  -1   4   6 3712.64  294.27
  -1  -4   6 3950.85  295.52
  -1  -4   6 3587.08  304.01
  -1  -4   6 3692.97  298.58
   1  -4  -6 3864.61  314.20
   1  -4  -6 4098.54  284.40
   1   4  -5   52.59   34.22
   1   4  -5   68.83   38.01
   1   4  -5   89.06   33.60
  -1   4   5   18.10   41.68
  -1   4   5   55.79   31.33
  -1  -4   5   61.04   43.14
  -1  -4   5   89.92   49.72
   1  -4  -5   63.68   67.84
  -1  -4   5   68.80   38.50
   1  -4  -5  111.10   40.29
   1   4  -4 1458.37  158.13
   1   4  -4 1463.93  140.63
   1   4  -4 1517.85  158.22
  -1   4   4 1607.44  199.05
  -1   4   4 1500.30  160.91
  -1  -4   4 1489.44  164.21
   1  -4  -4 1545.64  242.82
  -1  -4   4 1501.31  163.63
  -1  -4   4 1686.79  174.08
   1  -4  -4 1524.05  172.38
   1   4  -3  136.42   64.96
  -1   4   3  125.93   56.00
   1   4  -3   94.50   38.38
   1   4  -3  162.03   86.37
  -1   4   3   99.79   61.75
  -1  -4   3  141.87   56.25
   1  -4  -3  186.09  107.49
  -1  -4   3  120.45   40.94
  -1  -4   3  117.52   40.96
   1  -4  -3  167.08   72.11
   1   4  -217399.55  884.09
   1   4  -216267.50  804.27
  -1   4   217377.44  875.78
  -1   4   216670.76  825.70
   1   4  -215780.20  772.84
  -1  -4   214454.94  716.70
  -1  -4   216788.37  822.78
  -1  -4   215139.63  791.77
   1  -4  -215699.35  905.41
   1  -4  -216227.08  800.62
   1   4  -1  183.90   93.24
   1   4  -1  136.73   60.58
   1   4  -1  211.87   82.47
  -1   4   1  112.77   34.20
  -1   4   1  180.44   73.68
   1  -4  -1  186.83   73.15
  -1  -4   1  221.42   83.66
   1  -4  -1  139.05   56.89
  -1  -4   1  173.15   67.02
   1  -4  -1  137.32   65.80
   1  -4  -1  136.41   46.13
  -1  -4   1  172.18   63.58
   1   4   0 1747.76  142.86
  -1   4   0 1704.08  151.23
   1   4   0 1842.15  116.27
   1   4   0 1708.05  138.18
  -1   4   0 1591.21  121.18
  -1  -4   0 1529.99  162.14
   1  -4   0 1566.32  138.26
  -1  -4   0 1493.67  101.19
   1  -4   0 1760.04  109.12
   1  -4   0 1841.78  109.01
   1  -4   0 1683.86  169.53
  -1  -4   0 1645.29  115.07
   1   4   111506.66  564.20
  -1   4  -112356.41  659.07
   1   4   111982.74  622.46
   1   4   111913.53  605.97
  -1   4  -110674.91  536.70
   1  -4   112711.25  631.88
   1  -4   112245.30  623.58
   1  -4   111890.03  584.20
   1  -4   111368.64  604.39
  -1  -4  -110881.37  572.13
  -1  -4  -111849.62  599.96
  -1  -4  -112326.15  611.68
   1   4   2 5473.08  278.66
   1   4   2 6099.14  338.64
   1   4   2 6625.61  387.23
  -1   4  -2 6418.39  381.72
  -1   4  -2 5621.35  325.45
   1  -4   2 5568.72  299.81
  -1  -4  -2 5681.07  332.10
  -1  -4  -2 6802.27  377.01
   1  -4   2 6438.27  353.52
   1  -4   2 5640.20  391.52
   1  -4   2 6696.93  378.68
  -1  -4  -2 6506.68  333.85
  -1   4  -3  218.75   89.21
   1   4   3  161.58   39.63
   1   4   3  195.03   72.93
  -1   4  -3  192.41   92.04
   1   4   3  202.27   82.94
  -1  -4  -3  243.41  129.90
   1  -4   3  210.41  105.19
   1  -4   3  208.04   87.71
  -1  -4  -3  186.32   76.55
   1  -4   3  195.50   81.75
   1  -4   3  176.84   70.71
   1   4   4 2255.08  197.93
  -1   4  -4 2667.82  227.01
   1   4   4 2102.42  153.04
  -1   4  -4 2351.92  228.46
   1   4   4 2658.11  274.20
   1  -4   4 2451.79  233.78
  -1  -4  -4 2250.00  204.47
   1  -4   4 2613.42  347.51
  -1  -4  -4 2567.21  230.85
   1  -4   4 2635.50  270.67
   1  -4   4 2280.98  219.59
   1   4   5  506.20  233.27
   1   4   5  352.35   42.06
   1   4   5  387.74   74.85
   1   4   5  344.43  186.22
  -1   4  -5  430.00  186.04
  -1   4  -5  442.09  190.42
   1  -4   5  395.08  165.96
   1  -4   5  381.87  162.85
  -1  -4  -5  390.09  140.60
  -1  -4  -5  416.27  185.20
   1  -4   5  351.37  152.00
   1  -4   5  373.16  169.05
   1   4   6 2159.33  147.29
   1   4   6 1955.71  317.26
  -1   4  -6 2172.75  207.19
  -1   4  -6 1803.20  147.92
   1   4   6 2250.94  212.43
   1   4   6 2095.18  161.83
  -1  -4  -6 2089.35  191.27
   1  -4   6 1841.43  184.44
   1  -4   6 2108.57  322.91
   1  -4   6 2229.69  226.43
  -1  -4  -6 2154.01  175.98
   1  -4   6 2111.58  209.30
  -1   4  -7   99.38   57.31
   1   4   7  126.00   73.13
   1   4   7  129.84   56.78
   1   4   7  159.87   63.81
  -1   4  -7  153.20   49.98
   1   4   7  119.49   58.95
   1  -4   7  132.86   79.55
   1  -4   7  140.42   75.74
  -1  -4  -7   92.62   40.23
   1  -4   7  132.35   57.78
   1  -4   7  145.83   53.26
  -1  -4  -7  152.92   64.21
   1   4   8 1548.59  145.35
   1   4   8 1586.79  271.26
   1   4   8 1851.18  322.71
  -1   4  -8 1136.17   81.02
  -1   4  -8 1760.88  207.92
   1   4   8 1478.80  253.06
   1   4   8 1577.06  260.74
  -1  -4  -8 1564.76  175.79
   1  -4   8 1766.10  204.93
   1  -4   8 1441.21  550.05
   1  -4   8 1611.43  192.21
   1  -4   8 1569.71  258.10
   1   4   9   41.95   35.24
  -1   4  -9   33.47   24.65
   1   4   9   67.66   51.48
   1   4   9   19.17   19.84
   1   4   9   30.39   33.71
   1   4   9   10.15   15.75
  -1   4  -9   -4.28   63.71
   1  -4   9   30.79   36.82
   1  -4   9   27.73   28.17
  -1  -4  -9   12.93   27.07
   1  -4   9    3.04   30.65
  -1   4 -10 1365.49  292.06
   1   4  10  771.83  338.97
  -1   4 -10  603.89  268.03
   1   4  10  355.89  216.51
   1   4  10  677.13  276.95
   1   4  10  370.41  263.21
   1   4  10  396.46  247.24
   1  -4  10  680.20  344.29
   1  -4  10  569.73  277.31
  -1  -4 -10  684.56  311.95
   1   4  11    4.10   20.99
   1   4  11    2.16   30.23
   1   4  11    9.99   22.95
   1   4  11   -7.12   44.44
   1   4  11   13.17   36.85
  -1   4 -11   12.66    9.10
   1  -4  11    9.75   48.22
   1  -4  11  -10.65   58.81
   1   4  12   50.59   36.15
  -1   4 -12   52.17   35.74
   1   4  12   47.28   35.44
   1   4  12   22.66   44.40
   1   4  12   79.05   46.84
   1   4  12   64.42   49.80
   1  -4  12   50.06   43.66
   1  -4  12   61.55   50.12
   1   4  13  127.41   99.13
   1   4  13  119.13   93.48
  -1   4 -13  105.59   57.60
   1   4  13   52.74   58.01
   1  -4  13   94.67  108.94
   1  -4  13  153.43   85.45
   1   4  14  229.40  256.50
  -1   4 -14  353.79  226.25
   1  -4  14  416.92  355.00
   1  -4  14  211.55  203.82
   1   4  15   20.29   37.22
  -1   4 -15   33.84   42.89
   1  -4  15   65.18   57.00
   1   4  16  209.20  207.47
  -1   4 -16  401.93  186.97
   1   5 -15  203.07  103.86
  -1   5  15  251.45  126.08
  -1  -5  15  170.31  161.40
  -1   5  14   17.62   37.90
   1   5 -14   35.82   26.03
  -1   5  14    4.54   43.95
  -1  -5  14  -61.07   83.00
  -1  -5  14   35.19   39.68
  -1   5  13  365.66  387.99
   1   5 -13  457.31  152.02
  -1   5  13  366.88  397.40
  -1  -5  13  435.41  394.92
  -1  -5  13  718.00  490.41
  -1   5  12   28.57   49.16
   1   5 -12   42.61   32.90
  -1  -5  12   35.72   64.12
   1  -5 -12   33.97   66.77
  -1  -5  12   65.21   89.43
   1   5 -11 1272.97  483.30
  -1   5  11  944.68  382.24
  -1   5  11  895.13  193.64
  -1   5  11 1082.37  190.60
  -1  -5  11  729.76  467.48
   1  -5 -11 1065.51  552.10
  -1  -5  11  913.19  416.38
  -1   5  10   97.81   63.31
   1   5 -10   92.88   37.06
  -1   5  10   62.77   37.33
  -1   5  10   48.48   72.79
  -1   5  10   94.15   40.87
  -1  -5  10   99.22   60.93
  -1  -5  10   90.02   56.97
   1  -5 -10  189.52   57.31
   1   5  -9 2541.61  307.48
  -1   5   9 3404.06  442.48
  -1   5   9 3051.95  379.10
  -1  -5   9 3421.14  756.99
  -1  -5   9 3469.29  433.20
   1  -5  -9 2877.55  400.09
  -1  -5   9 2496.49  329.38
  -1   5   8 1382.61  405.47
  -1   5   8 1725.46  333.51
   1   5  -8 1321.48  388.64
   1   5  -8 1395.71  151.18
  -1  -5   8 1533.14  171.97
   1  -5  -8 1632.93  318.15
   1  -5  -8 1416.64  391.65
  -1  -5   8 1726.47  139.51
   1   5  -7 1572.21  165.75
   1   5  -7 1797.91  206.41
   1   5  -7 1882.88  470.44
  -1   5   7 1605.89  194.61
  -1   5   7 1575.46  193.37
   1  -5  -7 1726.95  476.93
  -1  -5   7 1520.36  560.93
  -1  -5   7 1892.18  184.27
   1  -5  -7 1637.84  420.26
  -1  -5   7 1511.19  188.22
  -1   5   6  201.93   95.63
   1   5  -6  119.58   57.13
   1   5  -6   72.12   46.11
   1   5  -6   43.70   54.10
  -1   5   6  106.58   66.16
  -1  -5   6   75.38   41.02
   1  -5  -6  128.39   57.83
   1  -5  -6  103.38   42.66
  -1  -5   6  115.67   51.80
  -1  -5   6  115.69   65.94
   1   5  -5 1081.58  436.54
  -1   5   5 1107.30  168.64
   1   5  -5 1058.57  328.70
  -1   5   5  813.69  301.12
   1   5  -5 1081.97  308.38
   1  -5  -5  972.72  417.07
  -1  -5   5 1058.39  357.44
   1  -5  -5 1133.90  132.29
  -1  -5   5  848.70  334.36
  -1  -5   5 1087.70  160.66
   1   5  -4   31.77   26.87
  -1   5   4    0.52   29.23
  -1   5   4   -0.15   44.96
   1   5  -4   -9.93   38.30
   1   5  -4   24.96   40.80
  -1  -5   4   -0.97   43.52
  -1  -5   4   11.73   25.20
  -1  -5   4   20.08   37.92
   1  -5  -4   30.32   47.75
   1  -5  -4    8.56   18.36
   1   5  -3 3811.08  320.77
  -1   5   3 3749.00  331.06
   1   5  -3 4772.41  453.48
   1   5  -3 3360.89  275.93
  -1   5   3 4040.82  350.06
  -1  -5   3 3290.34  309.03
  -1  -5   3 3762.20  338.56
   1  -5  -3 4093.25  329.24
   1  -5  -3 3850.45  342.40
  -1  -5   3 3963.14  329.77
  -1   5   2  816.29  114.31
  -1   5   2  983.55  337.54
   1   5  -2  818.32  109.82
   1   5  -2  897.18  375.18
   1   5  -2  671.87  107.86
   1  -5  -2  833.86  178.79
  -1  -5   2 1086.80  411.91
   1  -5  -2  825.77  254.86
  -1  -5   2  860.06  298.66
  -1  -5   2  671.99  206.46
   1  -5  -2  773.10   45.95
   1   5  -1 2429.60  258.10
   1   5  -1 2360.99  202.81
   1   5  -1 2249.51  230.19
  -1   5   1 2682.18  259.12
  -1   5   1 2373.51  395.00
   1  -5  -1 2257.57  222.80
  -1  -5   1 2706.21  339.73
  -1  -5   1 2224.94  232.56
  -1  -5   1 2213.91  197.96
   1  -5  -1 2540.58  248.64
   1  -5  -1 2278.65  175.54
   1  -5  -1 2115.97  166.10
   1   5   0   11.26   29.63
  -1   5   0   16.89   29.14
  -1   5   0   -2.28   23.40
   1   5   0   29.23   22.77
   1   5   0   -2.05   31.89
  -1  -5   0    9.73   24.91
   1  -5   0   17.89   31.74
  -1  -5   0   18.51   27.09
  -1  -5   0   16.72   26.80
   1  -5   0   36.61   28.18
   1  -5   0   -0.01   19.75
   1  -5   0    8.94   18.78
   1   5   1 3682.97  302.81
  -1   5  -1 3738.94  348.63
   1   5   1 3673.49  281.43
   1   5   1 3871.43  330.82
  -1   5  -1 3146.99  256.84
  -1  -5  -1 3544.26  307.33
   1  -5   1 3819.57  308.26
  -1  -5  -1 4051.33  313.38
  -1  -5  -1 3521.18  284.05
   1  -5   1 3367.34  301.64
   1  -5   1 5552.97  435.41
   1  -5   1 3691.79  292.12
   1   5   2 2638.27  205.48
  -1   5  -2 2256.15  198.92
  -1   5  -2 2484.25  247.06
   1   5   2 2547.27  245.08
   1   5   2 2598.73  278.53
   1  -5   2 2732.94  242.50
  -1  -5  -2 2932.56  240.83
   1  -5   2 2360.33  248.77
   1  -5   2 2560.31  247.00
  -1  -5  -2 2694.88  233.17
  -1  -5  -2 2539.19  242.18
   1  -5   2 2682.38  269.34
   1   5   3   25.60   27.92
  -1   5  -3   13.27   32.09
  -1   5  -3   28.76   20.52
   1   5   3   25.67   26.31
   1   5   3   19.00   14.31
   1  -5   3   16.62   17.17
  -1  -5  -3   11.73   21.70
   1  -5   3   28.93   27.88
  -1  -5  -3    5.67   30.75
   1  -5   3    4.00   24.45
   1  -5   3    8.27   39.33
   1   5   4 1599.99  157.32
  -1   5  -4 2234.23  218.49
   1   5   4 1953.46  190.28
  -1   5  -4 2049.64  175.05
  -1  -5  -4 1763.22  280.94
  -1  -5  -4 2062.42  177.70
   1  -5   4 2060.04  182.57
   1  -5   4 1746.57  166.29
   1  -5   4 2591.17  608.71
   1  -5   4 2042.38  203.86
  -1   5  -5 2221.14  306.72
   1   5   5 1879.15  284.84
   1   5   5 2054.47  190.73
  -1   5  -5 1952.24  194.15
   1  -5   5 1788.04  618.29
   1  -5   5 2107.70  212.35
   1  -5   5 1899.32  174.70
  -1  -5  -5 1778.05  172.93
   1  -5   5 2075.13  230.63
  -1  -5  -5 2263.24  188.68
  -1   5  -6   27.74   14.86
  -1   5  -6   25.29   35.47
   1   5   6   21.14   18.88
   1   5   6   27.27   25.43
   1  -5   6   13.82   36.27
   1  -5   6   63.40   61.90
  -1  -5  -6   56.95   27.07
   1  -5   6   33.97   44.56
   1  -5   6   16.98   30.57
  -1  -5  -6   65.16   42.45
  -1   5  -7  497.82  128.93
  -1   5  -7  412.40  280.15
   1   5   7  390.82  197.53
   1   5   7  509.60  228.11
   1  -5   7  336.95  216.09
   1  -5   7  449.22  272.75
  -1  -5  -7  536.00  173.58
   1  -5   7  576.22  271.70
   1  -5   7  618.58  312.66
  -1  -5  -7  632.84  213.56
   1   5   8  415.54  175.28
  -1   5  -8  383.86  227.66
  -1   5  -8  381.26  126.55
   1   5   8  356.06  241.46
   1   5   8  440.51  119.58
   1  -5   8  656.98  301.25
  -1  -5  -8  531.24  208.05
   1  -5   8  537.37  250.16
   1  -5   8  383.52  196.58
  -1  -5  -8  564.38  314.60
   1   5   9  783.68  362.33
   1   5   9  986.76  113.19
  -1   5  -9  808.97  223.56
   1   5   9  869.94   54.38
   1   5   9 1116.34  177.28
  -1  -5  -9  960.88  311.76
   1  -5   9 1156.07  452.63
   1  -5   9  968.36  205.30
   1   5  10  155.66   87.19
   1   5  10   97.15  142.63
   1   5  10  138.10   76.20
   1   5  10  128.85   87.73
  -1   5 -10  265.83   79.47
   1  -5  10  191.52   88.90
  -1  -5 -10  156.38   74.57
   1  -5  10  243.15  117.46
   1   5  11  502.97  252.50
  -1   5 -11 1628.42  693.76
   1   5  11  387.67  280.21
   1   5  11  513.04  366.62
   1  -5  11  533.23  335.27
  -1  -5 -11  611.33  270.65
   1  -5  11  515.85  283.87
  -1   5 -12  104.14   45.06
   1   5  12   43.01   38.83
   1   5  12  111.31   75.25
   1  -5  12   88.54   66.95
   1  -5  12   65.72   82.96
   1   5  13  515.74  469.55
  -1   5 -13  632.24  227.21
   1   5  13  688.00  299.19
   1  -5  13  476.25  536.90
   1  -5  13  845.44  569.45
  -1   5 -14   40.72   45.42
   1   5  14   44.15   66.25
   1  -5  14   76.70   54.99
   1  -5  14   39.73   57.63
   1   5  15  231.30  272.07
  -1   5 -15  173.16  111.13
  -1   5 -16   16.55   34.62
   1  -5  16   34.17   88.72
   1   6 -15   29.00   31.12
  -1   6  14  209.06  212.18
   1   6 -14  271.74  115.40
  -1  -6  14  220.78  299.39
  -1   6  13   35.04   55.95
   1   6 -13   26.84   41.02
   1  -6 -13   62.90   80.33
  -1  -6  13   -1.65   83.53
  -1  -6  13   45.17   41.37
  -1   6  12  602.97  145.95
   1   6 -12 1074.94  486.52
   1  -6 -12  580.62  422.57
  -1  -6  12  341.60  348.26
  -1  -6  12  728.25  373.57
  -1   6  11  202.65  109.08
   1   6 -11  252.04   95.36
   1  -6 -11  325.08  216.78
  -1  -6  11  197.16  124.04
  -1  -6  11  280.75  238.21
   1   6 -10 1945.97  331.43
  -1   6  10 2437.37  426.76
  -1  -6  10 2105.67  412.62
  -1  -6  10 1999.06  370.84
   1  -6 -10 2545.02  467.15
  -1   6   9  318.16  214.11
   1   6  -9  293.87  117.05
  -1   6   9  230.85  186.79
   1  -6  -9  313.80  136.20
  -1  -6   9  302.20  147.29
  -1  -6   9  332.54  209.99
   1   6  -8 1228.58  236.81
  -1   6   8 1291.70  220.79
  -1   6   8 1108.74  274.79
  -1  -6   8 1374.11  393.38
   1  -6  -8 1124.69  496.18
  -1  -6   8 1020.59  140.73
   1  -6  -8 1187.58  365.60
   1   6  -7  538.75  249.33
   1   6  -7  389.24  185.98
  -1   6   7  484.03  106.60
  -1   6   7  396.17  192.46
   1  -6  -7  483.27  164.66
  -1  -6   7  282.09  112.58
   1  -6  -7  398.47  162.64
  -1   6   6  199.52  104.27
   1   6  -6  213.02   70.74
   1   6  -6  173.09   61.10
  -1   6   6  212.65   75.25
  -1  -6   6  215.71  131.41
   1  -6  -6  224.65   92.48
   1  -6  -6  238.95  134.53
  -1  -6   6  123.65   48.86
  -1  -6   6  248.41   95.32
  -1   6   5   19.65   32.39
   1   6  -5   14.17   29.27
   1   6  -5   17.95   26.83
   1   6  -5   -5.97   59.95
  -1   6   5   25.96   27.54
   1  -6  -5   15.93   25.69
  -1  -6   5   17.98   27.56
  -1  -6   5   21.16   29.63
  -1  -6   5   17.16   33.32
   1  -6  -5   18.38   35.59
  -1   6   4 3266.79  292.78
  -1   6   4 3767.32  354.53
   1   6  -4 3844.85  382.54
   1   6  -4 3224.15  284.33
   1   6  -4 3309.15  480.90
  -1  -6   4 3734.68  328.72
  -1  -6   4 3100.43  499.20
  -1  -6   4 3520.54  353.68
   1  -6  -4 3400.44  402.24
   1  -6  -4 3825.81  386.14
   1   6  -3 3189.20  289.61
  -1   6   3 3641.09  358.01
   1   6  -3 3237.71  340.64
   1   6  -3 4556.68  490.93
  -1   6   3 3422.08  393.54
  -1  -6   3 2857.63  274.87
   1  -6  -3 3699.84  330.02
  -1  -6   3 3128.00  323.57
  -1  -6   3 3352.95  309.45
   1  -6  -3 3471.06  343.14
   1   6  -2 1778.18  200.14
   1   6  -2 2202.24  341.81
  -1   6   2 1973.28  296.03
  -1   6   2 2520.04  295.06
   1   6  -2 1845.25  272.19
  -1  -6   2 1722.41  180.33
   1  -6  -2 2195.09  347.87
  -1  -6   2 2101.79  240.30
   1  -6  -2 2121.91  297.54
   1  -6  -2 2343.37  202.68
   1  -6  -2 2114.56  175.02
  -1  -6   2 5177.54  812.30
   1   6  -1  625.01  253.15
  -1   6   1  460.81  137.99
   1   6  -1  590.54  136.91
  -1   6   1  467.17  239.50
   1   6  -1  516.50  183.71
   1  -6  -1  605.61  232.75
   1  -6  -1  457.60  205.89
   1  -6  -1  620.73  213.52
  -1  -6   1  594.07  238.32
  -1  -6   1  613.54  287.13
   1  -6  -1  517.79   50.98
  -1  -6   1  518.89  192.02
  -1   6   0 1691.36  288.35
  -1   6   0 1879.32  251.78
   1   6   0 2286.50  228.37
   1   6   0 1955.26  164.46
   1   6   0 1943.02  273.61
   1  -6   0 2009.91  222.80
  -1  -6   0 2014.51  269.60
  -1  -6   0 2118.48  284.58
  -1  -6   0 1878.12  197.91
   1  -6   0 1635.52  155.49
   1  -6   0 1829.40  142.47
   1  -6   0 2146.50  195.17
   1   6   1   22.06   19.84
  -1   6  -1   48.70   50.80
  -1   6  -1    1.25   17.61
   1   6   1   20.42   24.12
   1   6   1   12.09   42.34
  -1  -6  -1   13.77   21.30
   1  -6   1   11.61   27.44
  -1  -6  -1   17.95   32.01
   1  -6   1   24.39   46.10
  -1  -6  -1   46.80   34.55
   1  -6   1   13.81   22.68
   1  -6   1   34.51   38.31
   1   6   2 3253.59  272.95
   1   6   2 3685.70  387.01
  -1   6  -2 3623.82  358.48
  -1   6  -2 3122.28  284.86
   1   6   2 3574.92  333.65
  -1  -6  -2 3666.47  336.14
   1  -6   2 3961.59  356.26
   1  -6   2 3430.77  350.23
  -1  -6  -2 3234.78  379.72
  -1  -6  -2 4113.75  355.86
   1  -6   2 4531.62  397.31
   1  -6   2 3734.53  331.18
  -1   6  -3  108.91   52.55
   1   6   3  164.57   74.69
  -1   6  -3   67.03   53.05
   1   6   3   79.13   44.29
  -1  -6  -3  126.91   59.91
  -1  -6  -3  107.10   32.41
   1  -6   3   73.33   80.52
   1  -6   3   61.91   59.09
   1  -6   3  181.94   62.35
   1  -6   3   92.38   56.42
  -1  -6  -3  161.03   74.26
   1   6   4  627.25  346.40
  -1   6  -4  721.78  115.73
  -1   6  -4  595.07  261.56
   1   6   4  744.31  154.17
   1  -6   4  595.22  185.44
   1  -6   4  771.31  291.27
   1  -6   4  717.81  320.75
  -1  -6  -4  605.84  255.18
  -1  -6  -4  651.25  366.34
   1  -6   4  632.12  307.55
   1   6   5  764.19  150.33
  -1   6  -5  851.03  286.80
  -1   6  -5  956.04  433.11
   1   6   5  979.56  415.72
   1  -6   5  738.22  361.58
  -1  -6  -5  701.67  375.57
   1  -6   5  932.11  192.25
   1  -6   5  765.80  301.09
  -1  -6  -5  894.38  345.21
   1  -6   5  739.21  287.53
   1   6   6 2803.47  178.78
  -1   6  -6 3018.87  228.82
   1   6   6 2890.15  293.10
   1  -6   6 2358.50  234.36
   1  -6   6 2461.00  194.61
  -1  -6  -6 2708.30  251.79
  -1  -6  -6 2786.49  163.41
   1  -6   6 3216.13  282.86
   1   6   7  448.39  251.33
   1   6   7  453.97  165.48
  -1   6  -7  588.24  224.12
   1  -6   7  549.68  186.50
  -1  -6  -7  533.93  274.87
   1  -6   7 1149.59  512.95
   1   6   8  591.32  198.27
  -1   6  -8  670.30  279.68
   1   6   8  726.56  128.24
  -1  -6  -8  592.03  258.36
   1  -6   8  861.30  282.02
   1  -6   8  775.98  309.18
   1   6   9   16.17   25.85
  -1   6  -9    1.96   12.38
   1   6   9    1.60   20.95
  -1  -6  -9   14.62   26.88
   1  -6   9   30.25   58.45
   1  -6   9   30.52   51.70
   1   6  10  413.04  224.73
   1   6  10  265.31  304.22
  -1   6 -10  282.32  139.34
   1  -6  10  273.70  200.33
   1  -6  10  345.48  221.57
  -1  -6 -10  279.39  163.38
  -1   6 -11   81.04   53.62
   1   6  11   51.89   52.26
  -1  -6 -11  115.39   80.84
   1  -6  11   71.92   58.60
   1  -6  11   71.33   44.61
   1   6  12  469.22  282.85
  -1   6 -12 1106.22  661.26
  -1  -6 -12  608.54  465.37
   1  -6  12  356.85  417.49
   1  -6  12  525.58  292.47
  -1   6 -13   11.41   22.82
   1   6  13   25.96   48.28
   1  -6  13   35.89   45.36
   1  -6  13    7.66   55.80
  -1   6 -14  117.66   78.03
   1  -6  14  120.77  125.00
   1   6  15  -15.15   76.21
   1   7 -14   19.26   31.37
   1   7 -13 1871.02 1000.98
  -1   7  13  207.66  188.78
   1  -7 -13  338.13  184.53
   1   7 -12  -16.13   40.73
  -1   7  12   24.61   42.06
  -1  -7  12  -25.79   86.41
   1  -7 -12   14.13   52.01
  -1  -7  12  -62.27  104.37
   1   7 -11  512.12  239.40
  -1   7  11  646.82  412.64
   1  -7 -11  657.17  405.23
  -1  -7  11  817.17  563.56
  -1  -7  11  549.67  570.65
   1   7 -10   59.60   35.85
  -1   7  10   19.72   34.79
  -1  -7  10   53.83   49.19
  -1  -7  10   42.68   76.78
   1  -7 -10  128.56   65.49
  -1   7   9  421.81  353.10
   1   7  -9  583.42  149.27
  -1  -7   9  610.37  160.23
  -1  -7   9  571.69  231.07
   1  -7  -9  678.42  328.80
  -1   7   8  203.86  116.17
   1   7  -8  237.19  115.67
  -1  -7   8  495.62  277.19
   1  -7  -8  284.76  270.21
  -1  -7   8  200.38   97.43
  -1   7   7 1602.83  302.05
   1   7  -7 1715.33  362.78
  -1  -7   7 1307.89  375.85
  -1  -7   7 1539.85  763.98
   1  -7  -7 1501.69  482.62
  -1   7   6  125.51   59.06
   1   7  -6  108.17   66.06
   1  -7  -6  116.79   72.96
  -1  -7   6   57.37   40.90
  -1  -7   6  107.30   46.74
  -1   7   5 3456.57  404.43
   1   7  -5 3062.08  335.93
  -1   7   5 2774.28  458.47
  -1  -7   5 2819.38  538.30
  -1  -7   5 2767.43  351.02
   1  -7  -5 2867.30  593.52
   1   7  -4  155.23   96.75
  -1   7   4  236.10   89.63
   1   7  -4  258.86  114.48
  -1   7   4  155.86   74.00
  -1  -7   4  359.65  151.14
  -1  -7   4  332.85  141.95
   1  -7  -4  204.29   97.56
   1   7  -3 1971.31  407.35
  -1   7   3 1938.88  202.99
  -1   7   3 2115.92  332.46
   1   7  -3 1908.96  259.84
  -1  -7   3 2022.58  198.09
   1  -7  -3 2128.15  494.81
  -1  -7   3 3789.49  651.74
   1  -7  -3 2405.42  298.22
   1   7  -2  603.72  105.22
  -1   7   2  613.35  167.44
  -1   7   2  525.98  367.46
   1   7  -2  625.68  264.40
   1  -7  -2  668.73  299.41
  -1  -7   2  650.93  222.21
   1  -7  -2  665.15  102.68
   1  -7  -2  792.91  313.92
  -1  -7   2  659.17  253.25
   1  -7  -2  991.12  242.71
  -1   7   1 4164.91  375.16
   1   7  -1 4607.74  411.44
   1   7  -1 4270.97  325.37
  -1   7   1 3871.69  343.99
   1   7  -1 4130.31  338.40
   1  -7  -1 4356.67  376.91
   1  -7  -1 4194.60  323.23
   1  -7  -1 4388.40  394.22
   1  -7  -1 4445.21  331.46
  -1  -7   1 4226.91  384.22
  -1  -7   1 4044.27  324.14
   1   7   0  262.32  107.51
   1   7   0  153.73   72.44
   1   7   0  175.31   73.23
  -1   7   0  184.90   59.85
  -1   7   0  169.35   80.47
   1  -7   0  266.10  120.11
  -1  -7   0  294.85  115.90
   1  -7   0  258.69  113.75
   1  -7   0  170.18   88.02
  -1  -7   0  276.42   90.35
   1  -7   0  835.54  392.05
  -1   7  -1  141.52   63.82
   1   7   1  156.47  107.58
   1   7   1  212.21  109.02
   1  -7   1  179.98   82.03
  -1  -7  -1  143.95  100.66
  -1  -7  -1  230.09   95.35
   1  -7   1  149.25   67.67
  -1  -7  -1  149.90   73.26
   1  -7   1  212.43  110.53
   1   7   2  396.94  128.65
  -1   7  -2  267.36  109.88
   1   7   2  267.52  122.35
   1  -7   2  203.58  102.29
   1  -7   2  303.91  136.91
  -1  -7  -2  292.20  118.92
  -1  -7  -2  196.25   78.54
   1  -7   2  243.02   99.19
  -1  -7  -2  341.81  125.82
  -1   7  -3 1558.25  135.71
   1   7   3 1535.37  159.12
   1   7   3 1711.06  174.22
  -1  -7  -3 1452.54  373.70
   1  -7   3 1598.86  127.78
  -1  -7  -3 1444.05   59.48
   1  -7   3 1263.60  379.63
   1  -7   3 1595.93  634.97
   1   7   4   68.75   74.66
   1   7   4   66.76   47.89
  -1   7  -4   20.25   24.88
   1  -7   4   48.73   37.29
  -1  -7  -4   70.83   65.05
   1  -7   4   78.09   31.37
   1  -7   4   58.54   81.31
   1   7   5   52.60   68.84
  -1   7  -5   49.77   44.67
   1   7   5   57.67   55.72
   1  -7   5   90.81   50.45
   1  -7   5   61.98   66.41
  -1  -7  -5  110.98   61.30
   1  -7   5   58.07   37.42
  -1   7  -6   14.08   30.54
   1   7   6   14.67   35.69
   1   7   6   26.98   33.94
   1  -7   6   41.76   41.10
  -1  -7  -6   44.16   35.96
   1  -7   6   20.85   37.48
   1   7   7 1640.05  260.44
   1   7   7 1420.02  247.15
  -1   7  -7 1540.05  305.28
   1  -7   7 1629.30  479.86
  -1  -7  -7 1426.62  337.82
   1  -7   7 1479.46  349.52
   1   7   8  141.95   97.18
   1   7   8  176.57  129.83
  -1   7  -8  218.33   90.17
   1  -7   8  156.58  109.67
  -1  -7  -8  183.70   98.76
   1  -7   8  159.39   99.75
   1   7   9 1881.54  385.39
  -1   7  -9 1985.25  331.94
   1   7   9 2313.01  430.25
  -1  -7  -9 2048.19  645.18
   1  -7   9 2188.24  633.09
   1  -7   9 2379.96 1078.19
  -1   7 -10  184.72   82.24
   1   7  10  236.83  117.38
  -1  -7 -10  304.42  101.30
   1  -7  10  191.06   75.75
   1   7  11  317.41  281.01
  -1   7 -11  333.11  157.65
   1  -7  11  391.89  288.24
   1  -7  11  440.70  280.29
  -1  -7 -11  611.45  246.78
   1   7  12   14.89   31.33
  -1   7 -12   33.94   77.12
   1  -7  12   34.02   71.92
   1  -7  12   46.27   62.15
   1   7  13  122.08  138.29
  -1   7 -13  137.90   74.76
  -1   8  13   60.85   52.15
   1   8 -12  512.99  275.01
  -1   8  12  331.43  513.64
   1  -8 -12  607.87  282.41
   1   8 -11   21.09   24.96
  -1   8  11   14.58   85.94
   1  -8 -11    4.28   52.30
  -1  -8  11   40.36   58.10
   1   8 -10  303.82  113.16
  -1   8  10  302.95  182.68
   1  -8 -10  321.01  285.75
  -1  -8  10  391.69  265.92
  -1  -8  10  374.91  204.29
  -1   8   9   35.49   35.98
   1   8  -9   43.72   35.47
   1  -8  -9   50.22   70.51
  -1  -8   9   32.89   81.86
  -1  -8   9   98.04   49.41
  -1   8   8  576.38  350.93
   1   8  -8  597.55  193.47
  -1  -8   8  606.92  317.11
   1  -8  -8  736.00  330.19
  -1  -8   8  564.57  316.86
  -1   8   7   12.52   39.09
   1   8  -7   -8.14   51.94
  -1  -8   7   58.87   74.24
  -1  -8   7  -12.45   47.45
   1  -8  -7    8.05   41.70
  -1   8   6  658.49  332.08
   1   8  -6  936.38  314.51
  -1  -8   6  793.10  409.46
  -1  -8   6  711.43  293.91
   1  -8  -6  781.94  393.01
  -1   8   5  113.04   79.07
   1   8  -5  131.32   65.55
  -1  -8   5   92.46   84.88
  -1  -8   5   58.35   50.83
   1  -8  -5  119.22  105.95
  -1   8   4 1392.87  245.87
   1   8  -4 1213.23  229.59
  -1  -8   4 1266.72  412.57
  -1  -8   4 1425.48  265.83
   1  -8  -4 1324.35  604.75
  -1  -8   4 1046.20  312.94
  -1   8   3  398.99  233.70
   1   8  -3  469.07  160.83
  -1  -8   3  456.63  238.02
  -1  -8   3  474.88  191.66
   1  -8  -3  486.50  410.96
  -1  -8   3  493.86  220.52
   1   8  -2  428.60  271.63
  -1   8   2  588.48  214.62
   1  -8  -2  493.00  267.45
  -1  -8   2  429.95  222.51
   1  -8  -2  541.88   99.64
  -1  -8   2  458.46  234.95
  -1  -8   2  634.48  252.11
  -1   8   1   36.59   33.08
   1   8  -1   37.10   50.60
   1  -8  -1    7.49   26.18
  -1  -8   1   43.05   67.29
   1  -8  -1   25.59   28.92
  -1  -8   1   13.11   29.28
   1  -8  -1   42.58   35.96
  -1  -8   1   22.28   21.92
  -1   8   0 3198.86  771.89
   1   8   0 3752.23  747.30
   1  -8   0 3658.76  495.24
  -1  -8   0 3493.88  415.72
   1  -8   0 3152.37  397.30
  -1  -8   0 3887.96  588.29
  -1  -8   0 3566.37  474.48
   1  -8   0 3835.43  454.98
   1   8   1 1323.61  452.63
  -1   8  -1 1335.63  215.99
   1  -8   1 1407.36  191.89
   1  -8   1 2290.68  780.54
   1  -8   1 1482.55  447.24
  -1  -8  -1 1264.27  572.35
  -1  -8  -1 1645.96  242.62
  -1  -8  -1  734.49  220.90
   1   8   2 3068.59  620.02
  -1   8  -2 2969.92  448.42
   1  -8   2 2696.15  477.58
  -1  -8  -2 2752.52  539.65
   1  -8   2 2771.37  351.68
   1  -8   2 2880.84  375.03
  -1  -8  -2 2871.79  341.32
   1   8   3  273.40  106.13
  -1   8  -3  207.60   82.05
   1  -8   3  233.36  127.30
   1  -8   3  245.00  118.13
  -1  -8  -3  340.94  221.60
  -1  -8  -3   47.20   15.36
   1  -8   3  196.28  100.69
   1   8   4 2986.94  550.50
  -1   8  -4 2932.53  680.18
   1  -8   4 2840.40  409.70
   1  -8   4 3273.64  702.76
   1  -8   4 2731.04  289.02
  -1  -8  -4 2689.90  317.90
  -1   8  -5   53.90   64.89
   1   8   5   47.11   51.22
   1  -8   5   56.81   44.99
  -1  -8  -5   55.99   50.97
   1  -8   5   66.47   78.51
  -1   8  -6  492.75  378.07
   1   8   6  693.89  330.25
  -1  -8  -6  572.32  394.05
   1  -8   6  653.87  270.58
   1  -8   6  640.69  236.52
  -1   8  -7  323.56  110.61
   1   8   7  220.24  121.23
   1  -8   7  311.73  128.45
   1  -8   7  321.29  224.03
  -1  -8  -7  547.79  278.60
   1   8   8  689.58  508.40
  -1   8  -8 1105.87  334.92
  -1  -8  -8  922.73  599.69
   1  -8   8  956.46  519.08
   1  -8   8  902.67  563.04
  -1   8  -9   44.29   36.29
   1   8   9   44.34   35.43
  -1  -8  -9   39.10   56.02
   1  -8   9   53.27   86.47
   1  -8   9   59.32   41.81
   1   8  10  641.07  413.54
  -1   8 -10  513.21  330.57
   1  -8  10  561.54  355.49
   1  -8  10  524.69  642.24
  -1  -8 -10  759.95  418.90
  -1   8 -11   38.35   25.06
   1   8  11   36.12   72.44
   1  -8  11   97.04   79.15
   1  -8  11   26.45   50.94
   1   8  12  126.11  116.34
   1  -9 -11  308.68  318.41
  -1   9  10   19.55   44.23
   1  -9 -10  -19.66  119.43
  -1   9   9  299.71  292.68
   1   9  -9  361.70  272.55
   1  -9  -9  448.51  254.66
  -1  -9   9  383.19  373.22
   1   9  -8   93.82   72.32
  -1   9   8   79.61   76.11
  -1  -9   8  234.38  106.68
   1  -9  -8   97.96   79.87
  -1  -9   8  213.18  133.31
   1   9  -7 1560.83  462.08
  -1   9   7 1020.24  687.68
  -1  -9   7 1642.75  567.74
   1  -9  -7 1307.25  732.50
  -1  -9   7 1375.46  589.38
  -1   9   6  492.73  381.45
   1   9  -6  676.31  340.58
   1  -9  -6  683.77  578.36
  -1  -9   6  807.72  443.20
  -1  -9   6  593.25  346.61
  -1   9   5  985.52  570.12
   1   9  -5 1352.99  317.34
  -1  -9   5 1078.84  744.18
   1  -9  -5  934.75  295.30
  -1  -9   5 1252.67  434.17
   1   9  -4  126.13   72.30
  -1   9   4   45.48   43.00
  -1  -9   4  104.03   98.38
   1  -9  -4   45.56   41.36
  -1  -9   4   57.45   52.75
   1   9  -3 2010.11  363.30
  -1  -9   3 1973.29  545.11
   1  -9  -3 1755.11  343.35
  -1  -9   3   -3.74   49.10
  -1  -9   3 1977.02  338.17
   1   9  -2    2.35   70.43
  -1   9   2   21.17   36.45
  -1  -9   2   34.87   58.71
  -1  -9   2   20.24   30.13
  -1  -9   2   -1.33   50.91
   1  -9  -2   77.38   60.62
  -1   9   1   29.80   30.88
   1   9  -1   44.14   41.74
  -1  -9   1   37.32   33.98
   1  -9  -1   31.41   29.01
   1  -9  -1   31.08   25.86
  -1  -9   1   -3.27   58.44
  -1  -9   1   52.05   54.87
   1   9   0   44.51   67.69
  -1   9   0   -1.83   46.49
   1  -9   0   -5.23   15.36
  -1  -9   0   19.22   24.16
   1  -9   0  -10.07   81.63
  -1  -9   0   45.44   47.45
   1   9   1 3032.83  582.50
  -1   9  -2  457.94  189.70
   1   9   2  362.64  175.74
   1  -9   2  336.38  235.72
  -1  -9  -2  470.55  389.13
   1  -9   2  -26.27   54.93
  -1  -9  -2    2.69   12.82
   1  -9   2  308.35  212.65
   1   9   3 2133.34  804.13
   1  -9   3 2262.25  201.65
   1  -9   3 2463.77  323.58
  -1  -9  -3 1906.55  790.43
   1   9   4   17.61   33.59
  -1   9  -4   16.71   26.06
   1  -9   4   26.41   75.28
  -1  -9  -4  -28.56   72.08
   1  -9   4   -2.75   43.86
  -1   9  -5 2010.67  431.64
   1   9   5 1523.14  309.05
  -1  -9  -5 1328.04  446.04
   1  -9   5 1412.64  833.15
   1  -9   5 1394.42  358.16
   1   9   6   40.40   47.26
  -1   9  -6   14.04   44.93
   1  -9   6   45.53   40.24
   1  -9   6    3.20   80.76
  -1  -9  -6   35.02   63.42
   1   9   7  371.76  340.60
  -1   9  -7  351.30  202.32
   1  -9   7  411.57  282.65
   1  -9   7  465.79  283.15
  -1  -9  -7  455.49  377.81
  -1   9  -8  111.57   62.14
   1   9   8   89.91   89.40
   1  -9   8   54.37   51.00
  -1  -9  -8   60.31  133.51
   1  -9   8  121.60   89.46
   1   9   9   68.44   80.50
  -1   9  -9   91.82   50.42
   1  -9   9   85.77   70.18
  -1  -9  -9   76.92   67.36
   1 -10  -9   89.19  103.89
  -1 -10   8   96.91   73.54
   1 -10  -8   44.29   79.44
  -1  10   7   23.89   33.73
   1 -10  -7   22.63   52.29
  -1 -10   7   53.51   48.32
  -1  10   6 1593.69  230.15
   1 -10  -6 1348.52  322.65
  -1 -10   6 1353.98  501.85
   1  10  -5   16.30   63.74
  -1  10   5  -28.49   60.23
  -1 -10   5  -18.80  106.34
  -1 -10   5    6.26   61.56
   1 -10  -5   55.21   69.35
   1  10  -4 1449.16  311.23
  -1  10   4 1460.58  330.12
  -1 -10   4 1504.61  339.25
   1 -10  -4  992.52  813.46
  -1 -10   4 1560.40  398.48
   1  10  -3   39.48   52.61
  -1  10   3   29.31   40.25
  -1 -10   3   22.11   45.50
   1 -10  -3   15.11   51.86
  -1 -10   3   15.73   23.38
  -1  10   2  487.06  418.48
   1  10  -2  667.04  488.93
   1 -10  -2  463.46  415.45
  -1 -10   2  511.32  458.20
  -1 -10   2  542.93  363.63
  -1  10   1   -1.31   57.60
   1  10  -1   22.38   72.74
   1 -10  -1   32.43   74.22
  -1 -10   1   -8.03   91.98
  -1 -10   1   19.46   26.81
   1  10   0  477.47  277.96
  -1  10   0  419.48  235.14
   1 -10   0  399.60  261.11
  -1 -10   0  284.70  357.97
   1  10   1  280.36  199.62
  -1  10  -1  363.59  238.35
   1 -10   1  270.57  294.27
  -1 -10  -1  347.32  255.39
  -1  10  -2  106.75   78.27
   1  10   2  193.72  142.37
  -1 -10  -2  275.51  239.59
   1 -10   2  258.10  166.29
   1 -10   2  216.43  129.15
   1  10   3   58.91   69.83
  -1  10  -3   79.27   52.25
   1 -10   3  138.99  108.56
  -1 -10  -3  102.91  116.32
   1 -10   3  135.45   79.03
   1  10   4 2155.04  493.26
  -1  10  -4 2272.24  545.78
  -1 -10  -4 2127.75  461.27
   1 -10   4 2358.64  486.53
   1 -10   4 2134.26  642.20
   1  10   5    1.50   51.76
  -1  10  -5   28.79   49.68
   1 -10   5   15.52   46.32
   1 -10   5   57.97  108.31
  -1 -10  -5  113.77  383.41
   1 -10   6  692.31  359.03
  -1 -10  -6  977.44  533.76
   1 -10   7   89.94   40.30
  -1 -10  -7   21.01   46.37
   1 -10   8  434.14  518.94
  -1 -10  -8  427.32  332.40
  -1 -11  -1  105.88  102.31
  -1 -11  -2  359.06  263.39
  -1 -11  -3  146.23  125.45
  -1 -11  -4   50.70   72.89
  -1 -11  -5  372.10  341.63
  -2   0  17   -8.67   60.71
  -2   0  17   -0.48   93.45
  -2   0  16  179.65   78.59
  -2   0  15   24.92   61.51
  -2   0  15    2.85   31.02
  -2   0  15   27.92   38.39
  -2   0  14   83.11   70.97
  -2   0  14   84.04   68.18
  -2   0  14  110.29   97.81
  -2   0  13   -0.17   41.22
  -2   0  13    0.11   19.06
  -2   0  13   -0.17   23.82
  -2   0  13   -2.01   49.62
  -2   0  12   80.02   54.07
  -2   0  12  113.98   91.40
  -2   0  12  118.60   61.13
  -2   0  12   93.82   53.76
  -2   0  12   80.67   70.25
  -2   0  12   87.10   37.88
  -2   0  11   12.34   28.30
  -2   0  11    6.69   23.16
  -2   0  11   32.22   35.57
  -2   0  11    2.64   16.67
  -2   0  11    6.09   17.27
  -2   0  11   16.61   37.98
   2   0 -10 7379.60  560.72
  -2   0  10 9200.51  459.84
   2   0 -10 9077.02  717.02
  -2   0  10 9705.74  373.25
  -2   0  10 9084.64  665.46
  -2   0  10 9031.17  714.89
  -2   0   9   -0.97   46.62
  -2   0   9    0.18    9.44
  -2   0   9   10.20   34.07
  -2   0   9   27.19   21.98
   2   0  -9    5.74   24.53
   2   0  -9    8.32   19.26
   2   0  -8 3591.89  369.25
  -2   0   8 3365.52  305.45
  -2   0   8 2856.35  225.92
   2   0  -8 3108.08  234.31
  -2   0   8 3143.00  279.30
  -2   0   8 3397.75  292.23
  -2   0   7   13.58   22.56
  -2   0   7   -0.51    8.87
   2   0  -7   -6.73   34.10
  -2   0   7   13.54   26.69
   2   0  -7    2.58    7.97
  -2   0   7   -9.42   30.37
  -2   0   6  116.27   52.27
  -2   0   6   91.07   40.71
  -2   0   6   79.77   25.00
   2   0  -6  108.33   54.17
  -2   0   6   91.84   46.61
   2   0  -6  122.76   45.69
  -2   0   5   16.83   22.31
  -2   0   5    3.53   24.31
   2   0  -5    7.89   10.24
  -2   0   5    2.95    4.30
   2   0  -5    2.83   13.38
  -2   0   5   22.52   25.71
  -2   0   4 1857.66  194.88
  -2   0   4 2249.74  214.78
  -2   0   4 1693.62  122.30
   2   0  -4 1838.46  129.43
  -2   0   4 1649.73   87.79
   2   0  -4 2415.73  125.64
  -2   0   3   14.31   17.83
  -2   0   3    5.99   19.43
  -2   0   3    7.99    6.86
   2   0  -3    7.41    5.12
  -2   0   3   33.26   32.19
   2   0  -3   25.94   24.21
  -2   0   2 2165.47  144.24
   2   0  -2 2560.02  171.19
  -2   0   2 2081.16  131.73
   2   0  -2 1937.17  120.83
  -2   0   1   15.15   23.25
  -2   0   1   15.98   32.17
   2   0  -1   20.77   18.84
   2   0  -1    8.44   20.03
   2   0   0 4072.14  211.91
   2   0   0 3763.84  210.54
  -2   0   0 4264.40  228.66
   2   0   0 3858.50  187.36
  -2   0   0 4019.33  220.81
  -2   0   0 5180.71  252.01
  -2   0  -1    8.99   22.06
   2   0   1   19.87   26.63
   2   0   1    5.77    5.18
  -2   0  -1   10.85   10.28
   2   0   1    5.67    5.99
   2   0   2  960.88   47.93
  -2   0  -2  858.18   55.06
   2   0   2  947.24   72.48
   2   0   2  712.86   33.87
  -2   0  -2  987.31   61.53
  -2   0  -3    1.41    8.13
  -2   0  -3   13.81   21.31
   2   0   3    8.75   12.04
  -2   0  -3   24.92   22.15
   2   0   3   11.44   15.61
   2   0   3   -1.03   10.86
  -2   0  -4 6030.15  303.56
   2   0   4 6433.65  344.79
   2   0   4 5430.11  274.11
   2   0   4 6806.44  343.93
  -2   0  -4 8331.95  440.01
  -2   0  -4 7661.40  388.68
  -2   0  -5    7.63   22.72
   2   0   5   10.95   14.96
   2   0   5    7.36   15.52
  -2   0  -5   11.63   17.69
   2   0   5   -3.58   25.88
  -2   0  -5    0.35   14.32
   2   0   614448.92  694.34
  -2   0  -617004.71  837.68
   2   0   613686.54  700.23
   2   0   613978.37  683.43
   2   0   613635.73  679.89
  -2   0  -614013.00  675.92
   2   0   7   -1.37   13.04
  -2   0  -7    5.14   22.47
   2   0   7   40.25   28.90
   2   0   7   14.31   15.98
   2   0   7    9.03   22.64
   2   0   7   -4.65   32.61
   2   0   8 3998.16  333.95
   2   0   8 4365.02  354.67
   2   0   8 4225.63  340.80
  -2   0  -8 4689.55  363.94
   2   0   8 4345.70  366.57
   2   0   9   20.32   28.41
   2   0   9   39.81   35.26
   2   0   9   23.67   34.41
   2   0   9   -4.02   33.50
  -2   0  -9    5.66   21.23
   2   0  10 1332.82  487.99
   2   0  10 1230.53  139.40
   2   0  10 1188.56  149.05
  -2   0 -10 1206.97  123.23
   2   0  10 1042.84  446.44
   2   0  10 1230.68  160.27
   2   0  11   19.81   25.30
   2   0  11    2.92   37.88
  -2   0 -11    7.83   23.74
   2   0  11   43.28   44.09
   2   0  11    6.90   39.12
   2   0  11   15.63   33.78
   2   0  12  476.04  251.31
  -2   0 -12  595.75  214.84
   2   0  12  606.16  386.40
   2   0  12  613.27  175.71
  -2   0 -13    3.62   16.59
   2   0  13   13.55   21.29
   2   0  13   16.63   37.72
   2   0  13  -10.97   59.98
   2   0  14  820.40  309.74
   2   0  14  999.29  271.25
   2   0  14  830.12  238.67
   2   0  15   29.04   40.65
   2   0  15   15.31   37.76
   2   0  15    5.04   30.50
   2   0  16  274.12  239.55
   2   0  16  209.36  191.24
   2   0  17   17.37   42.39
   2   0  17   16.24   46.60
  -2   1  17  123.42  126.00
  -2   1  17   78.88   77.24
  -2  -1  17   92.78  110.50
  -2   1  16    2.06   71.95
  -2   1  16   11.30   45.82
  -2  -1  16   -1.53   40.14
  -2  -1  16   -8.60   85.19
  -2   1  15  311.47  258.33
  -2   1  15  247.41  191.08
  -2   1  15  206.42  233.83
  -2  -1  15  289.38  218.22
  -2  -1  15  179.20  270.62
  -2  -1  15  201.60  171.35
  -2   1  14   24.63   33.73
  -2   1  14   20.10   29.43
   2   1 -14   -1.90   15.07
  -2   1  14   14.29   21.55
  -2  -1  14    1.51   40.60
  -2  -1  14   13.49   43.54
   2   1 -13  360.90  157.69
  -2   1  13  335.82  196.90
  -2   1  13  230.21  166.60
  -2   1  13  227.64  141.02
  -2   1  13  257.97  174.88
  -2  -1  13  351.06  232.65
  -2  -1  13  311.33  169.93
  -2  -1  13  277.61  171.30
  -2   1  12  185.18  102.10
  -2   1  12  151.07   95.93
  -2   1  12  118.79   72.97
   2   1 -12  175.67   70.50
  -2   1  12  149.72   73.80
  -2   1  12  120.91   73.52
  -2   1  12  104.83   58.24
  -2  -1  12  108.51   61.16
  -2  -1  12   69.48   72.46
  -2  -1  12  195.13   78.29
  -2  -1  12  102.31   33.77
  -2   1  11 2573.81  634.25
  -2   1  11 2375.78  277.99
  -2   1  11 2563.20  380.88
  -2   1  11 2006.53  284.82
   2   1 -11 2693.64  149.17
  -2   1  11 2073.27  100.48
  -2   1  11 2153.22  159.70
  -2  -1  11 2268.89  449.54
  -2  -1  11 2208.11  685.63
  -2  -1  11 2076.67  189.34
  -2  -1  11 2282.69  186.08
  -2  -1  11 2743.92  152.82
  -2   1  10  306.76   59.28
  -2   1  10  447.83  162.67
  -2   1  10  258.80   89.33
   2   1 -10  309.90  142.16
  -2   1  10  330.15  154.57
  -2   1  10  356.28  148.56
   2   1 -10  387.48  138.71
  -2   1  10  324.66  175.09
  -2  -1  10  311.75  169.24
  -2  -1  10  381.15  169.17
  -2  -1  10  291.98  107.27
  -2  -1  10  323.20  143.40
  -2   1   9 2097.00  279.82
  -2   1   9 1705.00  190.64
  -2   1   9 1593.29  171.51
  -2   1   9 3152.28  352.80
   2   1  -9 1746.97  154.83
   2   1  -9 1696.18  188.17
  -2   1   9 1839.09  224.06
  -2  -1   9 1632.48  215.88
   2  -1  -9 1781.26  178.93
  -2  -1   9 1767.80  200.22
  -2  -1   9 2222.63  255.43
  -2  -1   9 2075.67  204.68
  -2   1   8  377.38  141.76
  -2   1   8  475.70  201.31
  -2   1   8  337.60   66.75
  -2   1   8  387.14  177.63
  -2   1   8  383.25  118.84
   2   1  -8  327.46  157.39
   2   1  -8  338.84   43.89
  -2  -1   8  402.44  150.35
  -2  -1   8  499.16  121.07
   2  -1  -8  441.32  178.11
  -2  -1   8  383.12  161.00
  -2   1   7 1088.39   87.41
   2   1  -7 1324.91  111.56
   2   1  -7  887.86   72.41
  -2   1   7 1236.14  157.95
   2   1  -7 1264.00  114.65
  -2   1   7 1487.54  262.03
  -2   1   7 1005.27   45.14
  -2   1   7 1358.75  448.85
  -2  -1   7 1499.66  133.99
  -2  -1   7 1293.92  119.92
  -2  -1   7 1046.22  162.23
   2  -1  -7 1320.35  163.46
  -2   1   6  857.55   65.15
  -2   1   6 1037.31  318.34
  -2   1   6  833.47   77.19
   2   1  -6 1055.79  215.28
   2   1  -6  752.30   46.92
   2   1  -6  846.80   89.57
  -2   1   6 1047.14  115.68
  -2  -1   6 1122.56   74.45
   2  -1  -6  892.36   81.39
   2  -1  -6 1138.88  152.83
  -2  -1   6 1019.38  177.20
  -2  -1   6  865.53  190.84
  -2   1   5 1832.30  106.08
   2   1  -5 1583.10  133.43
  -2   1   5 1487.98   90.27
   2   1  -5 1408.98  121.05
  -2   1   5 1860.69  141.59
   2   1  -5 1426.26   84.75
  -2   1   5 1654.01  147.11
   2  -1  -5 1514.59  112.75
   2  -1  -5 1647.23  206.29
  -2  -1   5 1683.62  108.66
  -2  -1   5 1535.24  131.00
  -2  -1   5 1288.64  113.73
   2   1  -4  242.26   88.08
  -2   1   4  183.92   66.77
  -2   1   4  165.30   16.57
   2   1  -4  154.59   36.78
  -2   1   4  228.86   99.60
  -2   1   4  193.16   32.52
   2   1  -4  229.48   88.57
  -2  -1   4  184.09   65.64
  -2  -1   4  217.94   96.90
   2  -1  -4  219.93  101.49
   2  -1  -4  230.93   96.65
  -2  -1   4  164.47  115.61
  -2   1   343303.28 1666.07
  -2  -1   349492.66 1895.48
   2  -1  -337280.28 1441.25
  -2   1   2 1350.23   76.05
  -2   1   2 1368.83  116.79
   2   1  -2 1292.61   80.14
   2   1  -2 1020.28   82.30
  -2   1   2 1219.61   99.95
   2   1  -2 1311.15   97.99
  -2  -1   2 1065.36   87.04
   2  -1  -2 1244.74   70.05
   2  -1  -2 1289.05  102.10
   2  -1  -2 1211.66   84.12
  -2  -1   2 1267.88  100.61
  -2  -1   2 1334.05   78.48
  -2   1   0 8336.00  416.34
   2   1   0 9512.33  469.66
   2   1   0 8526.54  440.82
   2   1   0 8504.96  415.28
  -2   1   0 8719.74  440.69
  -2   1   0 8653.84  416.74
   2  -1   0 7965.00  403.50
  -2  -1   0 8388.99  407.61
  -2  -1   0 8442.48  433.53
  -2  -1   0 7881.96  390.62
   2  -1   0 8100.40  408.20
   2  -1   0 9001.23  434.27
  -2   1  -115516.91  749.80
   2   1   115371.87  755.15
   2  -1   115355.96  744.02
  -2   1  -2  227.51   82.96
   2   1   2  201.21   61.50
   2   1   2  232.04   86.35
   2   1   2  179.56   23.13
   2   1   2  182.99   45.88
  -2   1  -2  235.92  102.93
  -2   1  -2  173.42   21.00
   2  -1   2  261.81   93.25
  -2  -1  -2  217.75   25.96
  -2  -1  -2  230.84   69.77
   2  -1   2  219.25   75.85
   2  -1   2  207.84   73.13
   2   1   3  458.17   38.27
  -2   1  -3  687.77  109.65
   2   1   3  430.40   46.86
   2   1   3  471.97   42.51
   2   1   3  505.33   52.60
  -2   1  -3  551.32   93.81
   2  -1   3  460.54   47.39
  -2  -1  -3  496.93   41.40
  -2  -1  -3  548.04   91.98
   2  -1   3  418.02   31.75
   2  -1   3  418.91   43.48
   2   1   4 3193.87  169.60
  -2   1  -4 2601.48  144.08
   2   1   4 4278.98  240.79
  -2   1  -4 2903.07  176.56
   2   1   4 3350.56  196.34
  -2   1  -4 3252.38  199.72
   2   1   4 2919.90  178.22
   2   1   4 3095.21  163.48
   2  -1   4 3075.39  219.70
  -2  -1  -4 3192.81  184.84
   2  -1   4 2871.78  172.11
   2  -1   4 2535.64  146.57
  -2   1  -5 8994.18  458.40
   2   1   5 8291.99  409.21
   2   1   5 9310.90  461.83
   2   1   5 7660.97  378.56
   2   1   5 8174.68  425.11
   2   1   5 8441.34  429.56
   2  -1   5 8064.94  417.99
   2  -1   5 7404.49  394.87
  -2  -1  -5 9888.07  501.26
   2  -1   5 7825.15  413.45
   2  -1   5 6857.67  343.05
  -2   1  -6 1155.83   91.62
   2   1   6 1018.38   72.73
   2   1   6 1060.26   76.53
   2   1   6 1107.59  107.89
   2   1   6 1146.91  126.91
  -2   1  -6  832.40   59.85
   2  -1   6  979.85   94.91
   2  -1   6 1003.46   69.54
   2  -1   6 1185.29  204.89
  -2  -1  -6 1107.49   83.31
   2  -1   6 1017.80  241.65
   2   1   7 3056.29  233.50
   2   1   7 3358.13  276.31
   2   1   7 3114.12  239.04
   2   1   7 3608.42  282.06
  -2   1  -7 3389.17  270.73
   2   1   7 3450.88  282.80
  -2   1  -7 2768.78  212.50
   2  -1   7 3448.64  277.71
   2  -1   7 3132.84  266.10
   2  -1   7 3598.71  300.15
   2  -1   7 3056.67  235.79
  -2   1  -8   85.24   35.85
   2   1   8   64.97   34.84
  -2   1  -8  103.01   37.89
   2   1   8   79.53   35.90
   2   1   8  111.16   54.06
   2   1   8  103.97   49.80
   2   1   8   84.68   43.89
   2   1   8  125.40   63.25
   2  -1   8  114.75   52.38
   2  -1   8   66.47   30.96
   2  -1   8   49.69   43.77
   2  -1   8   80.80   38.53
   2   1   9 2186.41  224.93
   2   1   9 2600.60  238.45
   2   1   9 2813.28  398.16
  -2   1  -9 3008.81  261.30
   2   1   9 2738.98  248.44
   2   1   9 2925.60  336.08
  -2   1  -9 2968.76  269.86
   2   1   9 2991.05  285.72
   2  -1   9 2988.69  323.16
   2  -1   9 2762.57  328.37
   2  -1   9 2476.45  216.48
   2  -1   9 2746.72  346.34
   2   1  10  136.64   44.27
  -2   1 -10  135.04   83.09
   2   1  10  124.04   48.55
   2   1  10  161.95   64.31
   2   1  10  136.07  103.53
  -2   1 -10  146.84   58.65
   2   1  10  154.39   53.32
   2   1  10  147.01   53.02
   2  -1  10  163.64   89.10
   2  -1  10   86.00   32.73
   2  -1  10  206.21   94.94
   2  -1  10  163.62   47.33
   2   1  11 3962.68  432.65
   2   1  11 3095.75  326.21
   2   1  11 6710.91  671.93
   2   1  11 3443.79  360.62
  -2   1 -11 4429.88  450.85
   2   1  11 3932.52  431.99
   2   1  11 3923.39  412.14
   2  -1  11 4112.64  446.78
   2  -1  11 4034.40  710.71
   2  -1  11 3616.69  365.42
   2  -1  11 3459.12  384.48
   2   1  12  735.13  157.96
   2   1  12  604.78  239.69
   2   1  12  648.02  434.28
   2   1  12  427.54  365.13
  -2   1 -12  863.71  349.67
   2   1  12  721.19  347.61
   2  -1  12  656.61  338.34
   2  -1  12  733.08  308.54
   2  -1  12  645.52  293.76
   2   1  13 1531.74  313.83
   2   1  13 1670.85  331.07
   2   1  13 1656.40  298.57
   2   1  13 1436.61  265.03
  -2   1 -13 1740.88  491.30
   2  -1  13 1554.78  307.56
   2  -1  13 1416.64  285.22
   2  -1  13 1511.32  303.90
   2   1  14    9.35   35.06
   2   1  14   34.88   30.43
   2   1  14   16.92   46.21
  -2   1 -14   44.47   15.28
   2  -1  14   20.06   23.12
   2  -1  14    8.76   43.24
   2   1  15  457.10  350.47
   2   1  15  395.78  292.20
  -2   1 -15  423.08  229.15
   2  -1  15  290.14  311.46
   2  -1  15  543.01  333.78
   2   1  16  -10.12   84.40
   2   1  16   12.21   37.52
   2  -1  16   -8.17   70.97
   2  -1  16   30.63   39.81
   2   1  17  258.41  329.00
   2   1  17  359.48  350.64
   2  -1  17  268.76  360.62
  -2  -2  17  -36.63   86.33
  -2   2  16  201.33  206.33
  -2   2  16  201.70  274.76
  -2  -2  16  290.85  195.43
  -2  -2  16  223.68  248.66
  -2   2  15   13.94   31.14
   2   2 -15   75.92   52.01
  -2   2  15   64.20   62.41
  -2   2  15   44.01   50.55
  -2  -2  15  125.15   85.63
  -2  -2  15   19.56   56.30
  -2   2  14 1689.94  345.77
  -2   2  14 1507.48  472.87
  -2   2  14 1589.75  326.73
   2   2 -14 1826.41  312.75
  -2  -2  14 1725.85  539.70
  -2  -2  14 1665.59  328.95
   2   2 -13  432.05  191.19
  -2   2  13  227.77  130.76
  -2   2  13  241.44  217.13
  -2   2  13  282.77  165.37
  -2   2  13  798.80  844.95
  -2   2  13  283.17  158.19
  -2  -2  13  292.82  210.59
  -2  -2  13  230.28  172.80
  -2  -2  13  168.89  127.09
   2   2 -12 2520.84  314.35
  -2   2  12 2695.17  339.50
  -2   2  12 2615.83  341.48
  -2   2  12 4217.50  565.48
  -2   2  12 2512.81  517.18
  -2   2  12 3000.99  566.20
  -2  -2  12 2217.30  340.88
  -2  -2  12 3139.22  389.76
  -2  -2  12 2098.28  302.24
  -2   2  11  183.42   72.13
  -2   2  11  298.42  116.23
  -2   2  11  215.71  127.45
  -2   2  11  232.35  153.28
   2   2 -11  267.81  125.12
  -2   2  11  258.80  132.99
  -2   2  11  252.97  137.76
   2   2 -11  234.00   74.95
  -2  -2  11  256.92  151.03
  -2  -2  11  227.23   97.92
  -2   2  10  718.79  324.39
  -2   2  10  792.77  322.55
   2   2 -10  662.22  352.71
  -2   2  10  725.19  108.58
  -2   2  10  704.05  367.07
   2   2 -10  605.29  254.55
  -2   2  10  724.61  225.42
  -2   2  10  618.80  139.80
   2   2 -10  600.41   65.61
  -2  -2  10 1023.03  257.32
  -2  -2  10  601.26  263.39
  -2  -2  10  782.11  126.61
  -2   2   9   35.14   39.58
  -2   2   9   13.03   41.09
  -2   2   9   11.58   17.19
  -2   2   9   12.95   20.97
   2   2  -9   26.74   33.64
   2   2  -9   22.11   28.55
  -2   2   9    2.59    8.42
  -2   2   9    5.37   27.00
   2   2  -9    2.43   11.40
  -2  -2   9   -0.32   22.80
  -2  -2   9   26.19   20.79
  -2  -2   9    3.01   12.82
  -2   2   8 1935.32  260.79
   2   2  -8 2337.41  212.26
   2   2  -8 1825.94  183.73
  -2   2   8 1914.00  180.16
  -2   2   8 2045.71  177.35
  -2   2   8 2064.62  150.10
   2   2  -8 1963.29  192.94
  -2  -2   8 1633.51  167.89
  -2  -2   8 1553.41  161.53
  -2  -2   8 2051.78  206.76
   2  -2  -8 2090.51  220.06
   2   2  -7   62.28   19.39
   2   2  -7   52.52   33.82
  -2   2   7   72.18   30.80
  -2   2   7  429.05  198.21
  -2   2   7   84.06   34.79
   2   2  -7   45.38   37.70
  -2   2   7   24.99   61.47
  -2  -2   7   64.31   51.07
  -2  -2   7  114.72   46.85
   2  -2  -7   60.52   29.66
  -2  -2   7   44.98   32.05
   2  -2  -7   64.29   55.38
  -2   2   6 4817.35  358.50
   2   2  -6 5509.27  435.85
  -2   2   6 4984.93  360.98
  -2   2   6 4811.50  342.31
  -2   2   6 5720.17  453.75
   2   2  -6 3941.37  281.99
   2   2  -6 5074.49  409.57
   2  -2  -6 5299.02  386.47
  -2  -2   6 4586.48  367.66
  -2  -2   6 5108.85  370.43
  -2  -2   6 4919.35  390.79
   2  -2  -6 4876.97  402.62
   2   2  -5 4888.25  254.42
  -2   2   5 3893.39  225.91
   2   2  -5 4977.33  304.40
  -2   2   5 4804.68  301.28
  -2   2   5 4671.79  267.23
   2   2  -5 4945.84  304.29
   2  -2  -5 4494.18  285.91
   2  -2  -5 4757.59  253.78
   2  -2  -5 4702.32  241.74
  -2  -2   5 4402.94  275.58
  -2  -2   5 4040.23  256.60
  -2  -2   5 4557.28  248.84
   2   2  -420211.72  971.65
  -2   2   419675.81  958.27
   2   2  -419911.35  999.69
  -2   2   419111.02  964.68
   2   2  -419158.72  961.75
  -2   2   418614.72  899.81
   2  -2  -419660.80  995.82
  -2  -2   417973.95  925.35
  -2  -2   417352.77  870.55
  -2  -2   418942.07  917.27
   2  -2  -419943.39  958.03
  -2   2   3 3655.26  231.16
   2   2  -3 3463.26  218.45
  -2   2   3 3710.14  200.36
   2   2  -3 4456.86  279.82
   2   2  -3 3362.12  196.75
  -2   2   3 4088.15  224.74
   2  -2  -3 3623.31  236.31
  -2  -2   3 3340.50  211.51
  -2  -2   3 3385.48  214.17
  -2  -2   3 3757.06  210.43
   2  -2  -3 3757.29  198.19
   2  -2  -3 3905.63  226.53
   2   2  -2 8508.64  451.83
  -2   2   2 8657.15  428.46
   2   2  -2 8293.11  416.70
  -2   2   2 8432.72  420.61
   2   2  -2 6677.93  359.83
  -2   2   2 8651.67  488.56
   2  -2  -2 8003.77  397.64
  -2  -2   2 7817.83  416.33
   2  -2  -2 8193.15  450.54
  -2  -2   2 8332.91  422.26
  -2  -2   2 8474.67  450.39
   2  -2  -2 8379.36  419.06
   2   2  -1 4201.88  239.13
  -2   2   1 4435.04  259.72
   2   2  -1 4328.61  275.57
  -2   2   1 4128.13  214.12
   2   2  -1 3951.41  213.89
  -2   2   1 3815.24  202.35
   2  -2  -1 3991.04  239.26
  -2  -2   1 3807.89  222.00
   2  -2  -1 4345.38  229.90
  -2  -2   1 3947.75  211.10
   2  -2  -1 4141.06  237.57
  -2  -2   1 4108.98  239.19
  -2   2   0 8962.24  466.63
  -2   2   0 8204.16  406.12
  -2   2   0 8248.73  409.06
   2   2   0 8889.99  456.83
   2   2   0 8233.43  417.55
   2   2   0 7576.03  390.60
  -2  -2   0 8350.08  427.56
   2  -2   0 8191.12  407.62
  -2  -2   0 9329.95  485.17
  -2  -2   0 8715.78  434.57
   2  -2   0 8594.14  428.16
   2  -2   0 8339.73  439.11
  -2   2  -1 1958.49  161.58
  -2   2  -1 1843.67  117.27
   2   2   1 1673.69  107.59
   2   2   1 1774.85  114.69
   2   2   1 1805.32  126.76
  -2   2  -1 1866.18  117.08
  -2  -2  -1 1807.63  176.35
   2  -2   1 1756.72  111.50
   2  -2   1 1903.50  137.44
  -2  -2  -1 1806.14  118.57
   2  -2   1 1689.45  110.76
  -2  -2  -1 1773.52  130.77
   2   2   2 3629.49  198.43
   2   2   2 3290.09  197.37
  -2   2  -2 3296.94  188.07
   2   2   2 3490.36  200.71
  -2   2  -2 3520.78  200.89
  -2   2  -2 3729.59  222.61
  -2  -2  -2 3638.61  206.02
  -2  -2  -2 3548.60  197.91
   2  -2   2 3795.99  217.66
   2  -2   2 3373.31  197.42
  -2  -2  -2 3400.13  192.57
   2  -2   2 3471.86  244.98
  -2   2  -3    8.58   23.34
   2   2   3   15.77   20.08
   2   2   3   29.00   23.81
  -2   2  -3   26.17   13.93
   2   2   3   15.35   17.86
  -2   2  -3   11.71   15.31
   2  -2   3   23.30   31.78
  -2  -2  -3   15.59   26.00
   2  -2   3    9.59   18.22
  -2  -2  -3   11.26   15.07
   2  -2   3    6.70   14.81
  -2  -2  -3   13.90   19.37
   2   2   418194.24  893.94
   2   2   420226.90  975.40
   2   2   419006.31  933.18
  -2   2  -421688.15 1092.15
   2  -2   418233.98  902.91
   2  -2   418518.26  919.22
   2  -2   417963.71  890.75
  -2  -2  -420131.03  975.06
  -2  -2  -420546.50  990.81
   2  -2   423212.15 1123.09
  -2   2  -5 2213.02  123.57
   2   2   5 2164.50  136.46
   2   2   5 2069.70  161.12
   2   2   5 2281.39  134.38
   2   2   5 2240.49  125.33
  -2   2  -5 2372.35  240.02
  -2  -2  -5 2318.88   98.66
   2  -2   5 2796.62  180.10
   2  -2   5 2006.39  139.87
   2  -2   5 2068.66  184.77
   2  -2   5 2253.01  150.57
  -2  -2  -5 2242.19  140.10
   2   2   6 7785.49  562.68
   2   2   6 6409.86  463.04
   2   2   6 6400.48  472.34
  -2   2  -6 6266.17  472.48
   2   2   6 5960.24  439.83
  -2  -2  -6 6207.34  447.89
   2  -2   6 5861.80  445.57
  -2  -2  -6 7240.47  526.07
   2  -2   6 6015.64  522.27
   2  -2   6 6263.21  478.81
   2  -2   6 7333.43  533.40
   2   2   7 1953.35  200.44
   2   2   7 1929.05  166.45
   2   2   7 2171.11  197.67
  -2   2  -7 1553.95   79.52
   2   2   7 2498.23  210.14
   2   2   7 1775.83  161.51
  -2   2  -7 2395.18  226.88
   2   2   7 1906.92  188.06
   2  -2   7 1917.42  201.96
   2  -2   7 2026.21  287.69
   2  -2   7 2533.28  233.54
   2  -2   7 2106.14  283.65
   2   2   8 6249.12  462.09
   2   2   8 6743.89  439.90
   2   2   8 6326.25  418.42
   2   2   8 6388.68  430.65
   2   2   8 5873.93  396.15
  -2   2  -8 6377.66  441.31
   2   2   8 6175.99  409.37
  -2   2  -8 4588.43  300.70
   2  -2   8 6643.98  778.05
   2  -2   8 5482.55  413.89
   2  -2   8 7132.76  484.68
   2  -2   8 6049.41  515.77
   2   2   9  865.03  130.55
   2   2   9  728.03  146.49
   2   2   9  732.57  167.65
   2   2   9  781.96  230.07
  -2   2  -9  955.81  392.80
  -2   2  -9  626.90   62.89
   2   2   9  750.07  225.37
   2   2   9  859.69  160.09
   2  -2   9  775.78  357.68
   2  -2   9  735.26  237.28
   2  -2   9  847.25  114.63
   2  -2   9 1051.15  123.51
   2   2  10 5791.10  450.96
   2   2  10 5503.44  432.38
   2   2  10 5575.84  456.90
  -2   2 -10 4731.74  341.72
  -2   2 -10 5529.68  426.57
   2   2  10 4841.23  363.84
   2   2  10 5046.68  371.57
   2   2  10 4343.99  313.75
   2  -2  10 5315.23  745.13
   2  -2  10 4578.55  382.61
   2  -2  10 6239.72  457.10
   2   2  11  274.45  197.06
   2   2  11  336.14  185.09
   2   2  11  281.48  158.98
   2   2  11  220.60  120.56
   2   2  11  303.40  170.93
  -2   2 -11  320.98  141.60
  -2   2 -11  312.07  126.45
   2   2  11  210.82   91.59
   2  -2  11  327.41  113.40
   2  -2  11  339.63  152.33
   2  -2  11  405.39  185.56
   2   2  12 2283.09  341.18
   2   2  12 3035.02  403.32
  -2   2 -12 2743.67  348.01
   2   2  12 2518.69  409.31
   2   2  12 2542.33  407.75
  -2   2 -12 2782.36  372.21
   2   2  12 2523.34  326.14
   2  -2  12 2416.94  367.56
   2  -2  12 2499.01  562.19
   2   2  13   30.62   65.48
   2   2  13   62.85   34.45
   2   2  13   60.52   46.33
  -2   2 -13  158.64   70.32
   2   2  13   35.53   45.59
   2  -2  13   19.06  105.80
   2  -2  13   91.19   53.38
   2  -2  13   75.81   75.13
   2   2  14  224.39  220.15
   2   2  14  312.48  245.99
   2   2  14  361.44  204.01
  -2   2 -14  546.76  161.95
   2  -2  14  288.32  327.89
   2  -2  14  447.74  187.68
   2   2  15   78.23   60.99
   2   2  15   28.25   41.79
   2  -2  15   24.79   56.52
   2  -2  15   59.12   46.51
   2   2  16  507.58  371.63
   2   2  16  462.52  367.26
  -2   2 -16  542.19  303.87
   2  -2  16  632.64  371.69
   2   2  17   -1.98   52.18
  -2   2 -17   40.18   31.18
  -2   3  16   47.76   59.36
  -2  -3  16   11.63   56.28
  -2   3  15  228.33  395.53
  -2   3  15  397.39  279.25
  -2   3  15  320.39  244.22
   2   3 -15  558.29  243.59
  -2  -3  15  602.98  460.35
  -2  -3  15  328.39  210.95
   2   3 -14  225.39   67.35
  -2   3  14  191.64  109.28
  -2   3  14  166.14  110.63
  -2   3  14  113.91  132.07
  -2  -3  14  251.56  106.56
  -2  -3  14  182.24  106.58
  -2   3  13  534.77  437.51
  -2   3  13  543.09  136.29
  -2   3  13  641.83  180.85
  -2   3  13  473.39  334.28
   2   3 -13  731.08  266.67
  -2  -3  13  684.01  302.66
  -2  -3  13  668.50  332.82
  -2  -3  13  636.93  282.35
  -2   3  12   67.19   51.02
  -2   3  12   60.76   30.20
   2   3 -12  133.10   65.65
  -2   3  12   84.15   97.74
  -2   3  12  115.55   66.31
  -2   3  12   53.40   48.29
  -2  -3  12  101.53   78.93
  -2  -3  12   84.07   48.25
  -2  -3  12   81.96   48.72
  -2   3  11   56.37   32.32
  -2   3  11   25.55   26.13
  -2   3  11   60.03   40.33
  -2   3  11   96.50   90.31
   2   3 -11   49.87   31.32
  -2   3  11   74.24   47.34
  -2   3  11   75.62   79.73
   2   3 -11   44.58   14.81
  -2  -3  11   55.16   48.40
  -2  -3  11   15.76   29.55
  -2   3  10   39.64   25.39
  -2   3  10   67.34   24.19
   2   3 -10   44.12   44.16
  -2   3  10   57.71   42.34
  -2   3  10   85.32   42.59
   2   3 -10  117.05   59.33
  -2   3  10  102.37   60.43
   2   3 -10   82.32   25.67
   2  -3 -10  107.19   42.45
  -2  -3  10   55.30   46.51
  -2  -3  10   49.62   34.22
  -2   3   9  892.25   79.00
   2   3  -9 1079.35   89.15
   2   3  -9  875.72  323.60
   2   3  -9  708.39  392.62
  -2   3   9  699.16   81.05
  -2   3   9  738.98  341.71
  -2   3   9  907.71  192.46
  -2   3   9  660.94   77.13
   2  -3  -9  960.95  345.52
  -2  -3   9  845.04  340.10
  -2  -3   9  589.34  372.99
  -2  -3   9  849.37  119.90
  -2   3   8  403.98  131.16
   2   3  -8  387.97  128.69
   2   3  -8  468.75  198.48
  -2   3   8  363.60   49.72
  -2   3   8  746.59  190.55
  -2   3   8  319.07  149.18
   2   3  -8  356.82  106.98
  -2   3   8  390.18  154.69
  -2  -3   8  386.15  187.12
  -2  -3   8  344.07  165.09
  -2  -3   8  257.37  128.35
   2  -3  -8  455.15  208.89
  -2   3   7 9703.11  709.55
  -2   3   711653.27  893.52
   2   3  -711229.30  882.99
   2   3  -710870.48  823.12
   2   3  -7 9381.99  673.16
  -2   3   710552.26  749.22
  -2   3   710566.03  768.73
   2  -3  -710643.86  815.78
  -2  -3   710143.93  780.19
   2  -3  -711272.52  810.92
  -2  -3   711537.26  837.37
  -2  -3   7 9834.31  759.84
   2   3  -6 7276.33  580.87
  -2   3   6 6651.75  466.63
  -2   3   6 7439.68  570.00
   2   3  -6 7935.96  564.76
  -2   3   6 7379.93  528.19
   2   3  -6 7495.42  578.02
  -2   3   6 7092.58  516.19
   2  -3  -6 7398.67  528.48
  -2  -3   6 7340.30  532.80
  -2  -3   6 7660.15  599.93
  -2  -3   6 6869.45  558.40
   2  -3  -6 7229.64  599.20
  -2   3   513454.20  927.76
  -2   3   512276.34  880.61
   2   3  -513389.70  967.52
  -2   3   513176.63  953.19
   2   3  -517629.90 1268.32
   2   3  -514320.50  996.70
  -2  -3   513549.33  947.49
   2  -3  -513912.46  967.07
   2  -3  -512566.58  946.36
   2  -3  -512772.98  871.50
  -2  -3   514861.15 1083.84
  -2  -3   511582.26  838.42
   2   3  -4   -5.17   44.98
  -2   3   4   14.86   14.69
   2   3  -4    6.46   20.39
   2   3  -4   11.85   22.36
  -2   3   4   17.84   14.64
  -2   3   4    6.10    6.37
   2  -3  -4   12.31   23.71
  -2  -3   4   12.98   21.48
  -2  -3   4   -0.54   42.64
  -2  -3   4  -12.20   22.35
   2  -3  -4    9.38   14.04
   2  -3  -4    4.66    5.49
   2   3  -3 2762.10  192.86
  -2   3   3 2512.38  125.68
   2   3  -3 2365.00  108.16
   2   3  -3 2548.14  179.99
  -2   3   3 2755.68  190.98
  -2   3   3 2701.34  194.08
  -2  -3   3 2740.47  204.24
   2  -3  -3 2472.58  188.12
  -2  -3   3 2550.24  180.44
   2  -3  -3 2627.11  155.98
   2  -3  -3 2681.22  133.66
  -2  -3   3 2811.98  181.25
  -2   3   2 2206.42  119.67
  -2   3   2 2412.45  180.44
   2   3  -2 2250.80  165.15
   2   3  -2 2235.64  144.66
  -2   3   2 2330.61  160.22
   2   3  -2 2111.51  189.60
   2  -3  -2 2133.39  163.74
  -2  -3   2 2582.24  188.82
  -2  -3   2 2139.22  165.80
   2  -3  -2 2331.33  161.40
   2  -3  -2 2366.54  133.43
  -2  -3   2 2309.68  183.56
   2   3  -1   81.41   44.44
   2   3  -1  117.50   52.25
   2   3  -1  133.20   65.97
  -2   3   1  157.04   69.69
  -2   3   1  153.20   44.35
  -2   3   1  127.02   60.22
   2  -3  -1  168.20   86.42
  -2  -3   1  133.42   59.68
   2  -3  -1  140.78   58.95
  -2  -3   1  134.59   54.14
  -2  -3   1  164.07   80.78
   2  -3  -1  181.85   78.14
  -2   3   0  816.53   48.46
  -2   3   0  985.15  149.54
   2   3   0  762.28   72.67
   2   3   0  938.16   77.89
   2   3   0  853.76   72.94
  -2   3   0  994.53   95.86
   2  -3   0 1022.34   86.95
  -2  -3   0  852.66   74.22
  -2  -3   0  879.19   98.74
   2  -3   0 1143.24  205.71
   2  -3   0  990.67   94.31
  -2  -3   0  945.60   72.95
   2   3   1 6129.80  336.47
   2   3   1 6044.00  335.09
  -2   3  -1 6419.91  339.32
  -2   3  -1 6977.97  398.29
   2   3   1 5522.34  294.98
   2  -3   1 6122.22  324.45
   2  -3   1 6072.93  354.32
   2  -3   1 6493.61  344.90
  -2  -3  -1 6628.28  356.97
   2  -3   1 6097.19  320.79
  -2  -3  -1 6519.99  360.75
  -2  -3  -1 6782.46  370.43
  -2   3  -2 4306.09  278.08
   2   3   2 4259.29  247.79
  -2   3  -2 4380.30  263.85
   2   3   2 4518.39  255.09
   2   3   2 4269.59  248.00
   2  -3   2 4016.64  236.79
   2  -3   2 3983.91  241.39
  -2  -3  -2 4521.20  258.34
  -2  -3  -2 4126.55  240.96
  -2  -3  -2 4019.98  230.40
   2  -3   2 4149.50  262.02
   2  -3   2 3988.54  230.36
   2   3   317690.01  872.84
  -2   3  -318402.11  911.26
   2   3   319762.86  966.37
   2   3   317844.58  862.41
  -2   3  -318562.93  890.72
   2  -3   318448.14  886.12
  -2  -3  -319091.05  915.76
  -2  -3  -318269.52  864.94
  -2  -3  -317663.42  865.68
   2  -3   317220.47  849.88
   2  -3   317478.62  870.25
   2  -3   317059.58  829.93
  -2   3  -4 2512.45  208.21
   2   3   4 2212.48  180.90
   2   3   4 2363.32  166.05
   2   3   4 2342.24  145.67
  -2   3  -4 2162.61  131.77
  -2  -3  -4 2411.86  175.32
  -2  -3  -4 2510.01  145.72
   2  -3   4 2365.49  297.55
   2  -3   4 2282.34  150.48
   2  -3   4 2533.43  173.50
   2  -3   4 2515.21  201.73
  -2  -3  -4 2356.79  113.65
  -2   3  -5  615.63  202.64
   2   3   5  513.00   90.93
   2   3   5  537.74   90.75
   2   3   5  591.13  197.79
  -2   3  -5  453.72   69.50
  -2  -3  -5  483.55   71.76
   2  -3   5  602.95  106.57
   2  -3   5  523.08   75.55
   2  -3   5  552.31  183.52
  -2  -3  -5  562.56   99.64
  -2  -3  -5  606.72  178.99
   2  -3   5  648.91  164.33
   2   3   6  700.02   75.42
   2   3   6  602.46   71.19
   2   3   6  699.85  127.05
   2   3   6  674.92  155.17
  -2   3  -6  456.05   45.01
  -2   3  -6  863.44  196.12
   2  -3   6  653.05  275.35
   2  -3   6  599.24  194.93
   2  -3   6  739.48  253.89
  -2  -3  -6  652.94   52.35
   2  -3   6  607.66  255.84
  -2  -3  -6  575.79   84.30
   2   3   7 3374.64  270.65
   2   3   7 2881.32  231.02
   2   3   7 3275.65  245.45
  -2   3  -7 3352.88  240.12
  -2   3  -7 3691.82  289.88
   2   3   7 3429.26  268.24
   2   3   7 3111.74  251.34
   2  -3   7 3010.52  288.23
   2  -3   7 3434.46  285.44
   2  -3   7 2927.26  270.12
  -2  -3  -7 3315.14  255.53
   2  -3   7 3547.53  277.93
   2   3   8  862.00  242.58
   2   3   8  730.33   73.51
  -2   3  -8  828.31  339.94
   2   3   8  721.74  260.92
  -2   3  -8 1627.16  208.94
   2   3   8  767.86  211.98
   2   3   8  947.06  308.39
  -2  -3  -8  734.34  292.22
   2  -3   8  725.95  415.93
   2  -3   8  825.04  300.56
   2  -3   8  842.03  464.31
   2  -3   8  883.69  324.91
   2   3   9 2076.44  245.10
   2   3   9 1711.74  165.11
   2   3   9 1555.16  154.84
   2   3   9 1664.17  209.30
   2   3   9 1738.58  315.33
  -2   3  -9 1397.59  201.39
   2   3   9 1652.79  316.72
  -2   3  -9 1774.74  218.96
   2  -3   9 1543.09  443.34
   2  -3   9 1573.95  180.15
   2  -3   9 1865.27  370.45
   2  -3   9 1842.30  666.63
   2   3  10  487.18  231.31
   2   3  10  499.77  234.81
   2   3  10  510.97  274.81
  -2   3 -10  531.02  222.48
   2   3  10  453.58  276.97
   2   3  10  598.15  193.85
   2   3  10  400.85  231.81
  -2   3 -10  441.88  149.14
   2  -3  10  582.11  175.29
   2  -3  10  480.87  245.77
   2  -3  10  577.00  251.52
  -2   3 -11   15.49   24.95
   2   3  11    5.83   46.11
   2   3  11    6.74   31.83
   2   3  11  -20.22   37.26
   2   3  11    8.65   20.37
   2   3  11   28.16   28.34
  -2   3 -11    9.97   14.74
   2  -3  11   42.20   34.85
   2  -3  11   35.97   56.52
   2   3  12  110.34   96.24
   2   3  12   65.49   66.68
  -2   3 -12   74.95   36.58
   2   3  12   50.53   44.66
   2   3  12   96.40   68.89
   2   3  12   94.11   48.23
  -2   3 -12  125.66   66.06
   2  -3  12  183.70  113.90
   2  -3  12   77.28   54.36
   2   3  13  753.88  448.65
   2   3  13 1163.12  139.02
  -2   3 -13 1001.87  227.03
   2   3  13 1075.63  193.61
   2  -3  13  937.02  468.71
   2  -3  13  535.96  526.17
   2   3  14   47.81   30.12
  -2   3 -14   42.48   32.17
   2   3  14   47.97   64.89
   2  -3  14   46.84   69.72
   2  -3  14   -9.08   64.63
  -2   3 -15  943.12  496.78
   2   3  15  483.18  472.75
   2   3  15  796.67  205.64
   2  -3  15  742.96  254.28
   2  -3  15  798.92  562.14
   2   3  16  -28.76   51.72
  -2   3 -16   12.78   20.44
  -2   3 -17  250.51  117.07
   2   3  17  178.72  199.71
  -2  -4  16  314.73  381.83
   2   4 -15   42.43   35.77
  -2   4  15   54.74   81.13
  -2  -4  15   57.70   65.37
  -2  -4  15   80.29   62.84
   2   4 -14  706.25  313.61
  -2   4  14  936.01  199.62
  -2   4  14  788.96  360.60
  -2  -4  14  860.36  627.69
  -2  -4  14  573.50  550.19
  -2   4  13   34.48   34.11
  -2   4  13   20.48   33.67
  -2   4  13   23.04   22.64
   2   4 -13   30.26   25.77
  -2  -4  13   21.48   56.16
  -2  -4  13   13.32   32.65
  -2   4  12 1421.63  394.95
  -2   4  12 1464.60  299.58
  -2   4  12 1509.55  418.26
  -2   4  12 1540.24  270.71
   2   4 -12 1129.95  304.77
  -2  -4  12 1436.23  358.68
  -2  -4  12 1243.79  600.54
  -2   4  11   20.16   51.58
  -2   4  11    7.52   20.88
   2   4 -11   21.05   50.62
  -2   4  11   -9.82   40.66
  -2   4  11    8.65   17.02
  -2   4  11    0.99   18.04
   2  -4 -11   13.82   42.27
  -2  -4  11   22.71   39.13
  -2  -4  11   47.61   59.61
  -2   4  10  844.07  443.62
  -2   4  10 1129.89  370.17
  -2   4  10  837.35  166.84
  -2   4  10  963.70   77.88
   2   4 -10 1143.00  549.67
  -2   4  10  871.44  157.03
   2   4 -10 1040.16  324.12
  -2  -4  10 1114.70  465.45
  -2  -4  10 1028.79  393.41
   2  -4 -10  837.03  359.99
  -2   4   9  296.92  140.48
  -2   4   9  196.13  105.18
  -2   4   9  203.34  127.47
  -2   4   9  183.01   80.74
   2   4  -9  180.32   61.56
  -2   4   9  209.31  106.29
   2   4  -9  244.56  152.82
   2   4  -9  182.57   54.99
   2  -4  -9  312.78  156.60
  -2  -4   9  230.32   76.43
  -2  -4   9  255.07  104.14
   2   4  -8 3206.20  259.63
   2   4  -8 3957.40  371.14
  -2   4   8 4338.00  393.38
  -2   4   8 4147.81  334.14
  -2   4   8 4006.71  306.02
  -2   4   8 3525.40  293.33
   2   4  -8 3770.84  739.93
   2  -4  -8 4292.01  345.28
   2  -4  -8 3716.77  355.71
  -2  -4   8 3554.85  407.61
  -2  -4   8 3893.92  362.23
  -2  -4   8 4280.68  362.50
  -2   4   7  536.24  157.36
   2   4  -7  588.92  102.13
  -2   4   7  560.92   41.54
  -2   4   7  649.97  295.79
  -2   4   7  593.25  128.29
   2   4  -7  624.45  176.11
   2   4  -7  598.00  260.81
  -2  -4   7  394.56  177.20
   2  -4  -7  646.56  189.47
   2  -4  -7  673.96  307.55
  -2  -4   7  596.73  208.98
  -2  -4   7  577.55  236.72
  -2   4   6 5759.70  424.83
   2   4  -6 6492.85  429.29
   2   4  -6 5955.84  435.56
   2   4  -6 6950.44  509.74
  -2   4   6 5584.21  374.73
  -2  -4   6 5731.31  436.70
   2  -4  -6 6123.21  458.69
  -2  -4   6 5186.56  384.24
  -2  -4   6 5967.69  406.25
   2  -4  -6 6031.23  425.16
  -2   4   5 1455.40   96.31
   2   4  -5 1866.75  197.46
   2   4  -5 1865.25  175.36
  -2   4   5 1600.52  342.21
   2   4  -5 1792.55  471.90
  -2  -4   5 1335.01  117.90
  -2  -4   5 1655.36  151.83
   2  -4  -5 1813.25  161.54
   2  -4  -5 1688.75  203.12
  -2  -4   5 1886.92  175.02
   2   4  -4  436.87  120.30
  -2   4   4  520.27  206.87
  -2   4   4  505.27  176.82
   2   4  -4  488.17  151.24
   2   4  -4  432.86  189.12
  -2  -4   4  450.11  225.38
  -2  -4   4  359.47  158.11
   2  -4  -4  482.75   61.39
   2  -4  -4  397.31  152.82
  -2  -4   4  496.37  182.59
   2   4  -3   65.54   29.54
  -2   4   3   89.43   30.93
   2   4  -3   76.58   29.85
   2   4  -3   80.25   38.40
  -2   4   3   32.99   51.92
   2  -4  -3   71.67   33.56
  -2  -4   3   91.93   40.47
  -2  -4   3   95.77   37.20
   2  -4  -3   79.96   28.62
  -2  -4   3   88.31   40.58
  -2   4   2  407.76  134.57
   2   4  -2  375.49  112.34
   2   4  -2  347.61  135.13
   2   4  -2  333.56  138.99
  -2   4   2  362.39  134.39
   2  -4  -2  336.42  107.94
  -2  -4   2  361.45  228.62
   2  -4  -2  394.48  163.46
   2  -4  -2  376.04   36.26
  -2  -4   2  309.53  139.13
  -2  -4   2  293.17  114.56
   2  -4  -2  378.00   96.63
   2   4  -1   21.29   23.36
   2   4  -1    5.37   15.14
  -2   4   1   13.04   17.48
  -2   4   1   18.15   22.94
   2   4  -1   28.76   29.43
   2  -4  -1    5.31   10.20
   2  -4  -1    1.48   31.86
   2  -4  -1   29.71   40.80
  -2  -4   1   41.09   37.76
   2  -4  -1   -5.10   12.89
  -2  -4   1    9.14   21.45
  -2  -4   1   17.71   17.39
   2   4   0 3006.53  183.66
   2   4   0 3232.14  238.41
   2   4   0 3586.98  236.96
  -2   4   0 2968.25  224.14
  -2   4   0 3537.57  244.24
   2  -4   0 3418.01  203.02
   2  -4   0 3340.77  235.33
  -2  -4   0 3523.17  222.64
   2  -4   0 3351.28  190.52
  -2  -4   0 3591.42  242.69
   2  -4   0 3535.95  218.20
  -2  -4   0 3201.00  198.04
  -2   4  -1 5013.39  292.88
   2   4   1 5628.17  328.30
   2   4   1 4312.04  238.21
   2   4   1 5302.58  319.77
  -2   4  -1 5688.32  347.63
  -2  -4  -1 5767.08  333.61
   2  -4   1 5973.81  324.34
   2  -4   1 5079.57  276.75
   2  -4   1 5602.97  331.06
  -2  -4  -1 5775.85  341.88
  -2  -4  -1 4956.54  299.17
   2  -4   1 5131.75  335.90
  -2   4  -222599.62  466.93
   2   4   220351.76  987.60
  -2   4  -222437.28 1077.08
   2   4   222629.97  402.15
   2  -4   221702.02 1045.98
   2  -4   223178.25  394.10
  -2  -4  -220025.86  987.77
   2  -4   219738.71  950.59
   2  -4   221047.71 1066.64
  -2  -4  -222768.30  346.36
  -2  -4  -223515.77  372.14
  -2   4  -3   26.52   41.95
   2   4   3   26.36   27.95
   2   4   3   18.62   15.70
  -2   4  -3   47.60   48.79
   2   4   3    8.48   22.64
  -2  -4  -3   24.07   15.55
   2  -4   3   15.96   23.82
  -2  -4  -3   24.60   25.60
  -2  -4  -3   47.13   22.53
   2  -4   3   37.50   25.57
   2  -4   3    2.92   32.16
   2  -4   3   54.57   26.00
  -2   4  -4  837.90   88.35
  -2   4  -4 1050.85  107.86
   2   4   4  972.65  112.07
   2   4   4  890.64  102.28
   2   4   4 1087.19  152.74
  -2  -4  -4  870.17  132.16
   2  -4   4  798.16  261.52
   2  -4   4  884.10  259.88
  -2  -4  -4  883.49   61.17
   2  -4   4  978.02  225.96
   2  -4   4  797.20   85.03
  -2  -4  -4  997.21  202.21
   2   4   5  569.31  206.82
   2   4   5  519.04  192.15
  -2   4  -5  608.41  284.04
  -2   4  -5  550.47  168.82
   2   4   5  537.32   73.27
   2  -4   5  567.68  211.61
   2  -4   5  499.88   71.10
   2  -4   5  563.00  236.77
  -2  -4  -5  488.30  106.85
  -2  -4  -5  527.74  170.46
   2  -4   5  548.55  187.47
  -2  -4  -5  630.37  259.93
  -2   4  -6 1727.70  137.63
  -2   4  -6 2112.37  243.91
   2   4   6 2284.43  188.84
   2   4   6 2299.61  214.94
   2   4   6 1991.25  245.34
  -2  -4  -6 2239.04  194.60
  -2  -4  -6 2477.70  200.87
  -2  -4  -6 2071.68  144.16
   2  -4   6 1960.55  238.16
   2  -4   6 2293.85  190.81
   2  -4   6 2003.90  193.86
   2  -4   6 2214.54  206.76
  -2   4  -7   21.49   16.45
  -2   4  -7   -7.33   46.95
   2   4   7   -7.58   31.87
   2   4   7   12.89   19.38
   2   4   7   18.47   21.71
   2   4   7   19.43   24.38
   2   4   7   25.91   26.56
  -2  -4  -7   40.13   27.74
   2  -4   7   18.20   24.18
   2  -4   7    9.76   19.24
   2  -4   7   -2.99   37.68
   2  -4   7   22.11   36.47
   2   4   8 1677.20  284.14
   2   4   8 1569.43  185.32
  -2   4  -8 1384.83  124.98
   2   4   8 1896.96  182.00
  -2   4  -8 1916.15  207.41
   2   4   8 1714.47  176.34
   2   4   8 1560.24  286.57
  -2  -4  -8 1646.40  180.76
   2  -4   8 1954.44  186.40
   2  -4   8 1548.76  174.70
   2  -4   8 1594.22  206.50
   2  -4   8 1540.11  593.09
  -2   4  -9   62.94   41.72
   2   4   9    8.03   16.40
   2   4   9   21.30   33.62
   2   4   9   57.01   33.90
   2   4   9   36.57   26.95
   2   4   9   48.56   25.66
  -2   4  -9   46.83   54.01
  -2  -4  -9   21.89   22.49
   2  -4   9   31.45   49.90
   2  -4   9   46.11   31.55
   2  -4   9   19.01   28.20
   2   4  10  338.30  130.43
  -2   4 -10  337.23  145.24
  -2   4 -10  377.28  139.40
   2   4  10  272.56  194.17
   2   4  10  305.35  199.18
   2   4  10  377.05  180.29
  -2  -4 -10  436.80  232.36
   2  -4  10  235.05  149.86
   2  -4  10  363.37  108.39
   2   4  11   39.59   26.98
  -2   4 -11   99.75   50.01
   2   4  11   91.05   64.66
   2   4  11   90.61   62.32
   2   4  11  139.98   67.39
   2   4  11   80.37   69.77
   2  -4  11   38.47   84.28
   2  -4  11  127.68   64.55
   2   4  12  458.44  174.69
   2   4  12  429.89  121.46
   2   4  12  388.89  211.91
  -2   4 -12  280.13  117.82
   2  -4  12  419.92  199.66
   2  -4  12  310.72  179.47
   2   4  13  188.97   86.63
  -2   4 -13  120.18   47.39
   2   4  13   72.45   61.30
   2   4  13  103.46   72.81
   2  -4  13  140.01  136.84
   2  -4  13  102.08   85.09
   2   4  14  559.67  416.34
  -2   4 -14  609.09  202.60
   2  -4  14  705.15  372.28
   2  -4  14  392.03  360.35
  -2   4 -15   14.45   15.03
   2   4  15    4.49   29.58
   2  -4  15   -4.29   69.88
   2   4  16   70.48   81.07
  -2   4 -16  176.23   79.34
   2   5 -15  205.57  110.36
  -2  -5  15  145.96  237.31
   2   5 -14  214.75  111.64
  -2   5  14  238.09  230.58
  -2   5  14  201.20  168.70
  -2  -5  14  316.42  175.24
  -2  -5  14  293.36  235.33
   2   5 -13 1082.30  324.82
  -2   5  13 1154.41  579.18
  -2   5  13 1341.01  433.97
  -2  -5  13 1341.77  429.01
  -2  -5  13 1244.33  534.05
   2   5 -12   60.26   43.29
  -2   5  12    6.75   32.50
  -2  -5  12  -21.58   73.24
   2  -5 -12   10.41   46.97
  -2  -5  12    7.95   69.88
  -2   5  11  885.51  175.38
  -2   5  11 1022.01  380.00
  -2   5  11 1066.11  198.42
   2   5 -11 1003.63  331.87
  -2  -5  11  667.47  395.48
  -2  -5  11  926.14  379.63
   2  -5 -11 1114.84  661.65
  -2   5  10   11.88   16.74
  -2   5  10   11.38   22.09
   2   5 -10   15.91   16.20
   2   5 -10    9.73   40.00
  -2   5  10  -21.34   64.74
   2  -5 -10   95.81   54.64
  -2  -5  10   27.03   29.34
  -2  -5  10  -11.06   47.34
   2   5  -9 4178.45  489.88
  -2   5   9 4635.70  592.50
   2   5  -9 4370.20  580.46
  -2   5   9 5354.15  716.80
   2  -5  -9 4361.19  561.53
  -2  -5   9 4813.85  721.47
   2  -5  -9 5753.43  677.82
  -2  -5   9 5653.80  678.35
   2   5  -8   12.27   19.46
  -2   5   8    3.85   48.95
   2   5  -8    1.18   28.61
  -2   5   8  -10.05   37.56
   2  -5  -8   20.52   22.84
  -2  -5   8   64.96   54.02
  -2  -5   8   28.17   46.60
   2  -5  -8   27.59   27.67
  -2   5   7  874.74  410.81
   2   5  -7  967.90  487.33
   2   5  -7  929.50  175.95
   2   5  -7 1113.18  315.31
  -2   5   7  980.89  223.22
  -2  -5   7  959.02  391.81
   2  -5  -7  875.59  155.45
   2  -5  -7 1187.12  268.52
  -2  -5   7  817.73  408.25
  -2  -5   7  798.71  353.17
  -2   5   6  478.58  208.50
   2   5  -6  477.54  129.97
   2   5  -6  477.93  188.57
   2   5  -6  379.41  174.48
  -2   5   6  376.12  197.71
  -2  -5   6  477.37  250.11
  -2  -5   6  319.10  147.17
   2  -5  -6  603.68  296.61
   2  -5  -6  537.94  101.61
  -2  -5   6  488.39  203.84
  -2   5   511592.21  385.24
   2   5  -510540.97  868.96
  -2   5   511195.80  300.10
   2   5  -510839.04  882.63
   2   5  -510502.49  863.35
   2  -5  -512119.01  292.77
  -2  -5   510120.04  913.12
   2  -5  -510330.89  860.44
  -2  -5   511545.98  335.29
  -2  -5   5 9624.19  790.87
  -2   5   4  157.92   69.95
   2   5  -4  250.98  109.55
   2   5  -4  240.95   97.99
   2   5  -4  266.60  131.80
  -2   5   4  225.65   94.57
   2  -5  -4  266.54  133.09
  -2  -5   4  247.05  135.21
  -2  -5   4  232.90  117.92
   2  -5  -4  240.14   73.34
  -2  -5   4  256.34  116.01
   2   5  -3 1759.30  235.93
   2   5  -3 1471.33  103.65
  -2   5   3 1855.29  211.97
  -2   5   3 1604.74  121.82
   2   5  -3 1754.11  190.15
   2  -5  -3 1757.85  178.99
  -2  -5   3 4109.72  886.47
   2  -5  -3 1728.83  199.07
  -2  -5   3 1651.53  189.76
  -2  -5   3 1772.88  171.95
  -2   5   2  198.76  112.74
   2   5  -2  222.25   75.53
  -2   5   2  208.71  120.69
   2   5  -2  198.92   85.45
   2   5  -2  215.69   98.54
   2  -5  -2  192.82   56.79
  -2  -5   2  199.92   97.44
  -2  -5   2  212.80   88.31
   2  -5  -2  240.18  107.65
   2  -5  -2  239.94   73.93
  -2  -5   2  223.24  132.48
   2  -5  -2  182.70   74.21
  -2   5   112896.47  386.56
   2   5  -112279.50  302.06
   2   5  -111768.81  886.96
   2   5  -113472.31  387.69
  -2   5   110962.21  813.67
  -2  -5   112675.34  433.88
  -2  -5   112024.80  878.71
   2  -5  -113153.04  234.84
  -2  -5   110901.26  810.70
   2  -5  -112645.68  217.10
   2  -5  -111966.94  893.69
   2  -5  -111646.09  892.69
   2   5   0  377.88  160.28
   2   5   0  671.08  245.89
   2   5   0  541.58  163.98
  -2   5   0  618.55  206.92
  -2   5   0  701.01  294.19
   2  -5   0  540.51  234.74
  -2  -5   0  519.09   74.30
  -2  -5   0  594.31  208.15
   2  -5   0  472.01   75.36
   2  -5   0  562.29  169.48
   2  -5   0  573.16  240.47
  -2  -5   0  464.95  210.43
  -2   5  -1 4622.97  390.12
   2   5   1 5516.61  452.58
  -2   5  -1 5569.73  479.80
   2   5   1 5217.38  413.74
   2   5   1 5158.13  390.50
  -2  -5  -1 5847.14  463.72
   2  -5   1 5821.97  449.41
   2  -5   1 5547.18  435.92
  -2  -5  -1 5096.92  400.22
   2  -5   1 4970.75  450.46
   2  -5   1 4720.83  371.01
  -2  -5  -1 4845.23  403.03
   2   5   2  919.24  233.18
  -2   5  -2  922.12  140.24
  -2   5  -2  908.70  159.03
   2   5   2  785.84   65.80
   2   5   2  906.95   96.18
   2  -5   2  904.80  256.28
  -2  -5  -2  995.16  141.70
  -2  -5  -2  856.87   96.31
   2  -5   2  833.59   91.28
   2  -5   2  859.80  303.33
   2  -5   2 1043.25  274.29
  -2  -5  -2 1012.71  120.13
   2   5   3 2488.93  200.97
  -2   5  -3 3098.01  292.18
   2   5   3 3198.13  280.60
  -2   5  -3 3049.98  259.30
   2   5   3 3217.37  567.44
   2  -5   3 3503.11  310.83
   2  -5   3 3096.33  345.41
  -2  -5  -3 3112.93  265.82
  -2  -5  -3 3021.32  333.30
   2  -5   3 3150.00  274.57
   2  -5   3 2788.23  239.22
  -2  -5  -3 3055.79  248.25
   2   5   4   76.20   36.24
   2   5   4  104.85   38.40
  -2   5  -4  118.31   55.56
   2   5   4   93.92   25.20
  -2   5  -4  175.55   71.02
   2  -5   4   85.31   38.78
  -2  -5  -4  113.50   50.66
   2  -5   4  108.61   48.02
   2  -5   4  102.41   43.40
   2  -5   4  129.68   46.64
  -2  -5  -4   91.24   37.11
  -2  -5  -4  107.26   39.54
  -2   5  -5 3896.23  569.62
   2   5   5 3275.11  303.33
  -2   5  -5 4070.50  390.03
   2   5   5 3068.93  247.05
   2   5   5 4237.55  386.16
   2  -5   5 4261.69  392.90
  -2  -5  -5 3340.10  328.42
   2  -5   5 3633.75  337.90
   2  -5   5 3686.04  331.29
   2  -5   5 3468.18  480.61
  -2  -5  -5 4063.83  352.59
  -2   5  -6  189.76   73.86
  -2   5  -6  153.98   88.47
   2   5   6  198.73  124.95
   2   5   6  136.44   76.53
   2   5   6  141.53   65.77
   2   5   6  149.03   55.76
   2  -5   6  229.06  119.94
   2  -5   6  226.43   73.34
   2  -5   6  179.02   68.07
  -2  -5  -6  126.44   66.84
  -2  -5  -6  178.99   70.66
   2  -5   6  190.32  107.37
   2   5   7  523.11  121.22
  -2   5  -7  458.68  213.29
   2   5   7  586.25  114.92
   2   5   7  535.92   90.33
   2   5   7  498.99  201.87
  -2   5  -7  518.14  312.79
   2  -5   7  442.25  177.10
   2  -5   7  712.35  272.80
   2  -5   7  609.00  243.93
  -2  -5  -7  680.62  263.53
   2  -5   7  419.47  160.68
  -2  -5  -7  600.10  155.75
   2   5   8   12.65   17.01
  -2   5  -8  -16.42   59.28
   2   5   8    8.66   13.34
   2   5   8   16.59   23.59
  -2   5  -8   12.93   14.46
   2   5   8   21.67   20.53
   2   5   8   15.65   30.00
   2  -5   8   18.61   28.95
   2  -5   8   23.25   27.85
  -2  -5  -8   -7.03   39.23
   2   5   9  146.72   72.84
   2   5   9  220.08  123.45
   2   5   9  152.27   71.45
   2   5   9  214.84  122.90
  -2   5  -9  281.28  110.89
  -2  -5  -9  196.80   97.65
   2  -5   9  114.39   64.40
   2  -5   9  146.86   87.06
   2   5  10   16.47   23.40
  -2   5 -10   52.63   40.28
   2   5  10    5.32   25.76
   2   5  10    5.20   25.76
   2   5  10    5.54   10.27
   2  -5  10    6.42   32.16
   2  -5  10   -0.60   35.62
  -2  -5 -10   10.94   27.31
  -2   5 -11 2470.57  722.75
   2   5  11 2311.37  472.69
   2   5  11 2119.01  465.28
   2   5  11 2577.29  490.76
   2  -5  11 2030.82  560.82
   2  -5  11 2244.61  458.10
  -2  -5 -11 2633.12  472.70
  -2   5 -12   26.00   19.39
   2   5  12   14.78   42.78
   2   5  12   21.44   45.45
   2  -5  12   24.67   85.30
   2  -5  12   53.11   69.51
   2   5  13  118.45  155.07
  -2   5 -13  221.26  107.44
   2  -5  13  263.39  252.52
   2  -5  13  267.49  237.71
  -2   5 -14   46.27   35.76
   2   5  14   10.37   39.69
   2  -5  14   25.81   66.37
   2   5  15  343.06  460.88
  -2   5 -15  347.13  232.65
   2  -5  15  240.14  290.14
   2   6 -15   22.27   23.30
   2   6 -14  216.37  121.55
  -2   6  14   92.24  160.50
   2   6 -13  112.76   48.72
  -2   6  13   39.25   60.97
   2  -6 -13   14.24   89.12
  -2  -6  13   50.24   35.39
  -2  -6  13   53.82   38.70
  -2   6  12 1385.76  419.69
   2   6 -12 1872.57  664.71
  -2  -6  12  997.84  795.62
   2  -6 -12 1529.05  807.78
  -2  -6  12 1350.59  231.57
  -2   6  11   53.93   53.98
   2   6 -11   16.13   13.88
  -2  -6  11   10.22   49.84
  -2  -6  11   14.58   38.68
   2  -6 -11   23.85   38.47
  -2   6  10 1614.34  514.05
   2   6 -10 1439.37  302.19
  -2  -6  10 2057.13  410.64
  -2  -6  10 1676.60  322.84
   2  -6 -10 1710.78  610.55
   2   6  -9   34.03   30.89
   2   6  -9   63.93   37.28
  -2   6   9   39.26   44.84
  -2  -6   9  115.57   86.65
   2  -6  -9   32.65   30.73
   2  -6  -9   21.43   38.49
   2   6  -8 1582.07  565.48
   2   6  -8 1912.55  345.02
  -2   6   8 1790.81  506.83
  -2   6   8 1586.88  264.70
  -2  -6   8 1900.71  293.50
   2  -6  -8 1805.83  239.87
   2  -6  -8 1849.07  691.07
   2   6  -7 1566.87  337.02
   2   6  -7 1219.38  394.57
  -2   6   7 1356.68  300.82
  -2   6   7 1487.78  198.97
  -2  -6   7 1325.49  338.99
  -2  -6   7 1762.38  250.77
   2  -6  -7 1308.44  318.07
   2  -6  -7 1638.70  303.72
   2   6  -6 1009.08  369.14
   2   6  -6 1136.94  318.49
  -2   6   6 1037.73  407.90
  -2   6   6  863.41  406.41
  -2  -6   6  748.92  405.26
   2  -6  -6 1072.45  320.12
   2  -6  -6 1073.73  329.09
  -2  -6   6 1175.90  167.01
  -2  -6   6 1168.30  133.59
   2   6  -5   15.08   46.06
  -2   6   5   18.77   26.90
   2   6  -5   22.47   30.91
  -2   6   5   11.43   38.59
   2   6  -5   23.67   27.02
  -2  -6   5  -25.19   41.80
   2  -6  -5   19.75   33.26
  -2  -6   5   10.20   45.35
   2  -6  -5    9.95   23.34
  -2  -6   5   -0.79   37.07
  -2   6   4 2721.73  260.04
   2   6  -4 2569.55  340.61
   2   6  -4 2389.64  225.98
   2   6  -4 2800.35  558.71
  -2   6   4 2668.15  359.44
  -2  -6   4 2886.41  341.83
  -2  -6   4 2725.03  511.92
  -2  -6   4 6325.97  844.43
   2  -6  -4 2672.59  297.86
   2  -6  -4 3115.34  433.04
   2   6  -3  975.91  343.53
   2   6  -3  845.88  330.46
  -2   6   3 1071.54  170.19
   2   6  -3  827.58  349.24
  -2   6   3  892.55  168.69
  -2  -6   3  974.22  434.01
  -2  -6   3  890.00  141.19
   2  -6  -3  775.50  343.02
   2  -6  -3 1064.93  144.60
  -2  -6   3  812.06  372.02
  -2   6   2 9190.91  742.12
   2   6  -210179.59  819.25
   2   6  -211926.53  433.08
   2   6  -2 9730.06  784.17
  -2   6   210551.71  958.17
   2  -6  -2 9294.24  787.64
  -2  -6   2 8492.37  696.62
   2  -6  -210239.08  822.20
  -2  -6   210193.08  896.51
  -2  -6   210154.04  818.89
   2  -6  -2 9588.23  736.22
  -2   6   1   35.31   26.84
   2   6  -1   50.54   53.74
  -2   6   1   64.45   51.35
   2   6  -1   52.71   16.65
   2   6  -1   35.41   30.04
  -2  -6   1   58.67   44.74
   2  -6  -1   12.23   31.89
  -2  -6   1   51.95   34.22
   2  -6  -1   36.41   22.73
   2  -6  -1   38.00   23.00
  -2  -6   1   38.97   37.54
   2  -6  -1   42.83   52.42
   2   6   0  476.88  208.36
   2   6   0  567.39  197.12
  -2   6   0  490.84  267.45
   2   6   0  663.26  239.96
  -2   6   0  456.66  143.88
   2  -6   0  512.84  175.24
   2  -6   0  483.25  226.72
   2  -6   0  478.81  205.69
  -2  -6   0  506.65  233.25
   2  -6   0  450.95  118.86
  -2  -6   0  485.44  271.24
  -2  -6   0  581.04  180.41
   2   6   1  199.63  125.36
  -2   6  -1  251.08   99.96
  -2   6  -1  260.76  101.24
   2   6   1  278.36  106.65
   2   6   1  191.43   83.21
   2  -6   1  231.04  111.50
  -2  -6  -1  187.47   94.89
  -2  -6  -1  301.86   86.42
   2  -6   1  234.93  100.13
   2  -6   1  229.21   80.99
   2  -6   1  216.31  100.55
  -2  -6  -1  267.22  110.88
   2   6   2  551.58   71.30
   2   6   2  680.84  143.97
   2   6   2  605.85  289.49
  -2   6  -2  590.54  237.65
  -2   6  -2  565.63  193.66
   2  -6   2  518.31  213.99
  -2  -6  -2  645.18  293.61
   2  -6   2  557.93   69.50
  -2  -6  -2  715.03  301.78
   2  -6   2  516.22  238.79
  -2  -6  -2  661.80  202.53
   2  -6   2  589.23  276.20
  -2   6  -3 1365.41  441.95
   2   6   3 1128.75  378.15
  -2   6  -3 1346.92  567.15
   2   6   3 1119.40  211.83
   2   6   3 1227.11  118.94
   2  -6   3 1379.51  276.41
  -2  -6  -3 1401.90  142.62
   2  -6   3 1357.98  336.14
  -2  -6  -3 1392.28  177.87
   2  -6   3 1234.45  135.33
  -2  -6  -3 1120.62  211.77
   2  -6   3 1105.47  177.91
  -2   6  -4 2680.15  251.75
   2   6   4 2365.34  373.88
  -2   6  -4 2750.25  372.65
   2   6   4 2696.20  208.73
   2   6   4 2500.69  249.72
   2  -6   4 2301.38  235.92
   2  -6   4 3002.69  323.64
   2  -6   4 2106.15  259.26
  -2  -6  -4 2156.59  223.85
  -2  -6  -4 2691.64  249.51
   2  -6   4 2556.30  301.54
  -2   6  -5  814.07  208.26
   2   6   5  467.26  307.36
   2   6   5  608.59   23.25
   2   6   5  730.73  223.31
  -2   6  -5  740.74  358.93
   2  -6   5  745.51  287.76
   2  -6   5  678.78  281.12
   2  -6   5  679.15  285.88
  -2  -6  -5  884.01  306.70
   2  -6   5  631.20  274.61
  -2  -6  -5  829.82  371.26
   2   6   6 3568.66  200.78
   2   6   6 3897.68  362.23
  -2   6  -6 3874.76  190.44
   2  -6   6 4458.18  271.19
   2  -6   6 3600.88  207.86
   2  -6   6 3843.55  703.98
  -2  -6  -6 3879.42  285.16
   2   6   7  214.86   86.57
  -2   6  -7  294.96   76.30
   2   6   7  321.95  196.36
   2  -6   7  354.91  155.10
   2  -6   7  347.83   99.21
  -2  -6  -7  336.81  174.22
   2   6   8  705.98  358.41
  -2   6  -8  738.52  134.93
   2   6   8 1116.18  201.78
   2  -6   8  833.32  303.73
  -2  -6  -8  884.14  417.14
   2  -6   8  879.33  533.81
  -2   6  -9   22.41   24.66
   2   6   9   -0.82   47.90
   2   6   9   22.72   30.70
   2  -6   9   28.93   34.29
  -2  -6  -9   15.27   37.66
   2  -6   9   33.97   46.08
  -2   6 -10 1324.67  238.62
   2   6  10 1776.69  351.62
   2   6  10 1399.50  321.05
  -2  -6 -10 1457.23  450.68
   2  -6  10 1585.36  249.87
   2  -6  10 1490.37  196.91
  -2   6 -11   55.52   82.74
   2   6  11   -3.63   58.51
  -2  -6 -11   13.91   24.51
   2  -6  11   28.18   27.58
   2  -6  11    8.40   67.61
  -2   6 -12  737.15  393.21
   2   6  12  329.70  325.47
   2  -6  12  503.67  418.67
   2  -6  12  592.90  308.91
   2   6  13  -11.31   60.61
  -2   6 -13   20.75   30.40
   2  -6  13   -9.88   44.42
   2  -6  13   47.42   38.42
  -2   6 -14   79.51   48.52
   2   6  14   96.62   45.22
   2  -6  14  113.78  138.19
   2   7 -14    7.09   29.85
   2   7 -13  142.08   85.75
  -2   7  13   60.39   51.01
   2  -7 -13  123.47   78.84
   2   7 -12   52.82   43.81
  -2   7  12   35.52   46.77
  -2  -7  12  -13.60   92.52
   2  -7 -12    4.43   41.67
  -2  -7  12  -22.06   65.39
   2   7 -11 1058.66  378.79
  -2   7  11 1832.08  336.90
  -2  -7  11 1851.65  363.57
   2  -7 -11 1810.46  514.97
  -2  -7  11 1249.81  256.66
  -2   7  10  233.69  132.30
   2   7 -10  209.98  123.60
  -2  -7  10  266.66  144.57
  -2  -7  10  167.78  112.21
   2  -7 -10  260.51  126.38
   2   7  -9  353.05  150.02
  -2   7   9  217.09  124.05
  -2  -7   9  359.04  208.19
   2  -7  -9  341.29  168.32
  -2  -7   9  223.47  134.58
  -2   7   8  -15.12   48.66
   2   7  -8   11.84   30.86
   2   7  -8   31.81   40.74
  -2  -7   8  -10.80   84.17
   2  -7  -8   62.60   49.29
   2   7  -7  673.38  286.02
   2   7  -7  856.20  179.25
  -2   7   7  478.76  248.75
  -2  -7   7  688.54  403.61
   2  -7  -7  504.48  253.80
   2   7  -6  371.53  180.55
  -2   7   6  359.39  232.71
   2   7  -6  448.59  154.66
  -2  -7   6  585.49  318.36
   2  -7  -6  265.31  120.45
  -2   7   5  289.12  124.75
   2   7  -5  268.31  140.09
   2   7  -5  363.23   93.47
  -2  -7   5  340.12  233.76
  -2  -7   5  355.90  213.37
   2  -7  -5  323.36  232.77
  -2   7   4 1042.62  163.30
   2   7  -4 1071.15  230.69
   2   7  -4 1061.80  216.55
   2  -7  -4 1104.47  436.64
  -2  -7   4 1289.71  555.96
   2  -7  -4 1132.95  574.08
  -2  -7   4  772.77  380.64
  -2   7   3 4942.65  480.84
   2   7  -3 4476.20  310.54
   2   7  -3 4841.99  265.63
  -2  -7   3 5420.86  318.25
   2  -7  -3 4509.70  454.94
  -2  -7   3 4354.81  438.95
   2  -7  -3 5237.11  235.13
   2   7  -2 2863.85  192.23
  -2   7   2 2586.47  167.69
   2   7  -2 2488.63  189.11
   2  -7  -2 2883.39  261.45
   2  -7  -2 3012.90  103.90
   2  -7  -2 2839.13  122.08
  -2  -7   2 2701.50  223.93
  -2  -7   2 2608.27  226.81
   2  -7  -2 2981.67  232.57
   2   7  -1 5784.50  229.50
  -2   7   1 5101.61  224.67
   2   7  -1 6356.67  330.08
   2   7  -1 5616.96  252.61
  -2  -7   1 5162.22  408.97
   2  -7  -1 6300.58  255.39
  -2  -7   1 6812.75  287.63
   2  -7  -1 5422.00  377.79
   2  -7  -1 5797.35  247.16
   2  -7  -1 5899.40  203.82
  -2   7   0 1538.28  210.95
   2   7   0 1713.24  167.41
   2   7   0 1781.54  364.02
   2   7   0 1802.56  206.36
  -2  -7   0 1635.24  339.01
  -2  -7   0 2121.79  428.21
   2  -7   0 1624.13  106.10
   2  -7   0 1732.65  219.25
   2  -7   0 1680.96  149.57
   2   7   1 1279.68  500.02
  -2   7  -1 1091.49  173.73
   2   7   1 1234.05  152.20
   2   7   1 1193.97   91.68
   2  -7   1 1177.08  148.67
  -2  -7  -1 1538.65  422.67
  -2  -7  -1 1054.73  430.57
   2  -7   1 1206.75  421.72
   2  -7   1 1126.84  212.43
   2   7   2   28.45   53.94
   2   7   2   38.46   55.73
   2   7   2   44.38   24.76
  -2   7  -2   33.12   34.69
  -2  -7  -2   22.58   21.44
   2  -7   2   48.80   41.01
   2  -7   2   31.90   27.35
  -2  -7  -2   78.73   56.32
   2  -7   2   38.73   54.96
   2   7   3   94.19   48.66
   2   7   3   71.67   74.48
   2   7   3  117.03   74.65
  -2   7  -3  158.83   56.75
  -2  -7  -3  121.64   70.97
   2  -7   3  171.30   72.34
   2  -7   3  160.95   59.96
  -2  -7  -3  119.13   58.57
   2  -7   3  155.38   87.84
   2   7   4   13.50   40.26
  -2   7  -4   40.59   31.83
   2   7   4   17.47   39.03
   2  -7   4   12.98   23.56
   2  -7   4   12.87   41.17
   2  -7   4   71.31   53.44
  -2  -7  -4    8.55    6.36
  -2  -7  -4   43.60   32.35
  -2   7  -5  201.36  104.20
   2   7   5   72.37  100.72
   2   7   5  211.24   99.71
  -2  -7  -5  144.74   86.92
   2  -7   5  178.82   58.63
   2  -7   5  157.18   71.22
   2  -7   5  147.76   66.21
   2   7   6   48.98   32.24
   2   7   6   47.69   42.09
  -2   7  -6   48.43   26.38
   2  -7   6   71.54   61.79
   2  -7   6   50.68   44.42
  -2  -7  -6   51.26   35.71
  -2   7  -7  674.30  217.11
   2   7   7  498.20  465.63
   2   7   7  576.45  211.39
   2  -7   7  628.52  282.53
  -2  -7  -7  705.39  321.38
   2  -7   7  530.98  284.30
  -2   7  -8   50.21   35.20
   2   7   8  -18.16   57.58
   2   7   8    7.03   40.89
   2  -7   8   14.24   37.71
  -2  -7  -8   84.13   59.86
   2  -7   8   25.55   46.37
   2   7   9  994.35  573.94
  -2   7  -9  951.95  289.37
  -2  -7  -9 1307.81  552.68
   2  -7   9 1046.79  615.16
   2  -7   9 1316.01  203.20
   2   7  10   30.95   54.61
  -2   7 -10   26.15   29.93
  -2  -7 -10   49.47   64.88
   2  -7  10   42.47   38.69
   2  -7  10   40.03   69.99
  -2   7 -11  512.18  249.28
   2   7  11  444.35  399.22
   2  -7  11  509.57  432.03
  -2  -7 -11  612.00  307.84
   2  -7  11  416.24  279.81
   2   7  12   -5.60   56.74
  -2   7 -12  153.79  269.10
   2  -7  12    0.09   80.64
   2  -7  12    8.14   46.07
   2   7  13  182.54   82.17
   2  -7  13  208.57   97.07
  -2   8  12  212.40   97.64
   2   8 -12   61.78   44.35
   2  -8 -12  119.93  121.01
  -2   8  11   69.11   69.45
   2   8 -11   54.68   43.04
  -2  -8  11   39.23   54.88
   2  -8 -11   80.88   98.42
  -2   8  10  990.27  300.44
   2   8 -10  990.72  222.09
  -2  -8  10  797.35  773.84
   2  -8 -10  946.56  547.50
  -2  -8  10  759.34  467.29
   2   8  -9 1196.00  296.40
  -2   8   9 1128.76  415.09
  -2  -8   9 1030.31  359.23
  -2  -8   9  779.54  570.88
   2  -8  -9  871.52  640.39
   2   8  -8 1712.42  561.06
  -2   8   8 1651.93  390.83
  -2  -8   8 1440.66  457.64
  -2  -8   8 1292.82  925.74
   2  -8  -8 1623.55  457.45
  -2   8   7   47.06   46.46
   2   8  -7   26.25   24.11
  -2  -8   7   36.58   73.81
   2  -8  -7   35.85   36.27
  -2  -8   7    0.06   44.26
  -2   8   6  269.79  196.25
   2   8  -6  283.68  134.52
   2  -8  -6  155.53   89.43
  -2  -8   6  243.86  167.01
   2   8  -5   55.91   60.26
  -2   8   5   48.46   49.48
   2   8  -5   61.67   60.11
  -2  -8   5   26.64   53.59
   2  -8  -5   49.23   47.63
   2   8  -4 1093.43  244.37
  -2   8   4 1137.07  265.79
   2   8  -4  957.41  323.95
   2  -8  -4 1123.29  523.21
  -2  -8   4 1200.15  189.53
  -2  -8   4 1038.42  604.79
  -2   8   3   13.48   23.39
   2   8  -3  128.11   73.44
   2   8  -3  143.88   49.44
  -2  -8   3  182.93  107.63
   2  -8  -3  117.41  112.00
  -2  -8   3  144.72   89.32
  -2   8   2   71.87   45.45
   2   8  -2   73.18   29.46
   2   8  -2  139.10   60.51
  -2  -8   2   39.46   75.60
   2  -8  -2   83.72   35.13
  -2  -8   2   94.49   92.22
   2  -8  -2  131.25   97.34
   2   8  -1  261.10  114.19
  -2   8   1  265.78  108.28
   2   8  -1  265.24  128.58
  -2  -8   1  273.21  153.58
   2  -8  -1  -12.46   24.65
  -2  -8   1  302.12  147.41
   2  -8  -1  373.40  211.43
   2  -8  -1  318.38  147.25
   2   8   0 4407.30  556.49
  -2   8   0 3558.32  472.61
   2   8   0 3658.43  448.13
   2  -8   0 4053.21  491.00
  -2  -8   0 3673.42  497.92
   2  -8   0 3783.13  513.93
  -2  -8   0 4408.25  709.93
   2  -8   0 2958.23  420.50
   2   8   1 1130.71  413.47
  -2   8  -1 1165.56  208.14
   2   8   1 1098.83  152.19
  -2  -8  -1 1176.36  558.37
   2  -8   1  853.38  394.95
   2  -8   1 1093.21  550.17
   2  -8   1 1059.98  171.82
  -2  -8  -1  654.62  190.86
  -2   8  -2 1178.41  264.22
   2   8   2 1284.57  475.45
   2  -8   2 1014.99  370.86
   2  -8   2 1205.09  488.35
  -2  -8  -2 1226.01  497.14
   2  -8   2 1249.03  391.11
  -2  -8  -2    7.97   28.15
   2   8   3  351.19  114.48
  -2   8  -3  418.31  159.63
   2  -8   3  233.95  159.01
   2  -8   3  340.83  140.17
  -2  -8  -3  228.92  127.69
  -2  -8  -3    3.83    9.79
  -2  -8  -3  423.95  143.87
   2  -8   3  393.72  194.09
   2   8   4 1630.67  716.61
  -2   8  -4 1668.74  473.05
   2  -8   4 1839.12  256.23
   2  -8   4 1631.39  250.96
  -2  -8  -4 1831.70  349.71
   2  -8   4 1638.95  469.84
  -2   8  -5   24.45   36.55
   2   8   5   38.57   40.17
   2  -8   5   35.14   31.80
   2  -8   5  109.66   81.53
  -2  -8  -5   41.09   39.94
  -2   8  -6  765.22  307.98
   2   8   6  600.13  294.25
   2  -8   6  596.77  241.09
  -2  -8  -6  660.27  323.85
   2  -8   6  666.17  317.51
   2   8   7  118.29   74.00
  -2   8  -7  156.39   76.04
   2  -8   7   66.92  110.22
  -2  -8  -7  105.88   77.42
   2  -8   7   88.23   54.98
   2   8   8 1419.58  385.32
  -2   8  -8 1383.63  346.94
   2  -8   8 1275.57  305.19
   2  -8   8 1450.15  461.35
  -2  -8  -8 1425.39  543.85
  -2   8  -9    0.29   29.76
   2   8   9   24.47   32.07
  -2  -8  -9   18.07   47.49
   2  -8   9   27.80   61.89
   2  -8   9   58.70   51.22
   2   8  10  297.30  290.76
  -2   8 -10  467.15  253.13
   2  -8  10  388.92  315.29
  -2  -8 -10  621.68  312.26
   2  -8  10  460.52  257.04
   2   8  11   50.24   58.82
   2  -8  11   94.23  134.63
  -2   9  11   17.46   36.92
   2  -9 -11   75.84   88.79
  -2   9  10   50.17   63.64
   2   9 -10   82.87   56.00
   2  -9 -10    3.46   71.75
   2   9  -9  357.91  307.25
  -2   9   9  260.43  334.48
   2  -9  -9  387.45  357.22
  -2  -9   9  326.27  270.93
  -2   9   8  114.17   56.48
   2   9  -8  141.66   84.87
  -2  -9   8  154.60   55.93
   2  -9  -8  122.86  134.01
  -2  -9   8   73.45   76.55
   2   9  -7 2513.82  764.36
  -2   9   7 2640.43  449.88
   2  -9  -7 2249.57  718.25
  -2  -9   7 2257.49  389.51
  -2  -9   7 2783.16  573.58
   2   9  -6    6.62   30.54
  -2   9   6   19.68   49.13
  -2  -9   6  -10.91  101.71
   2  -9  -6   49.57   51.99
  -2  -9   6  -12.62   48.13
  -2   9   5  554.59  328.56
   2   9  -5  803.63  287.92
   2  -9  -5  532.39  327.76
  -2  -9   5  740.45  403.00
  -2  -9   5  699.18  532.69
   2   9  -4  260.39  163.40
  -2   9   4  437.47  149.03
   2  -9  -4  177.59  126.88
  -2  -9   4  340.48  158.32
  -2  -9   4  265.94  257.14
   2   9  -3 1292.54  526.45
  -2   9   3 1447.97  283.23
   2  -9  -3 1499.12  744.67
  -2  -9   3 1534.60  439.75
  -2  -9   3    3.51   37.34
   2   9  -2   42.59   33.80
  -2   9   2   31.45   54.15
   2  -9  -2  -13.09   78.57
  -2  -9   2   33.31   54.50
  -2  -9   2   -6.92   69.88
  -2  -9   2   54.92   60.78
   2   9  -1   64.84   68.25
  -2   9   1   25.19   38.87
  -2  -9   1   33.21   39.66
  -2  -9   1    3.84   49.40
   2  -9  -1   27.84   56.35
   2  -9  -1   16.97   19.74
  -2  -9   1   20.89   37.91
   2   9   0   22.57   34.83
  -2   9   0   48.17   54.52
   2  -9   0   36.95   36.18
   2  -9   0   -0.31   51.32
  -2  -9   0   39.83   48.36
  -2  -9   0   68.64   39.21
  -2   9  -1 1897.20  278.40
   2   9   1 1981.02  398.35
   2  -9   1 1666.01  493.92
  -2  -9  -1 1779.60  255.53
   2   9   2  368.93  125.86
  -2   9  -2  412.00  174.90
  -2  -9  -2  332.48  152.48
   2  -9   2  424.69  252.79
  -2  -9  -2  264.98   92.31
   2  -9   2   14.25   45.74
   2  -9   2  271.15  203.00
   2   9   3 2465.89  508.27
   2   9   4   89.26   86.97
  -2   9  -4   71.90   62.37
  -2  -9  -4   54.99   33.13
   2  -9   4   50.91   65.69
   2  -9   4   94.13   51.05
   2   9   5 1136.23  528.19
  -2   9  -5 1317.03  364.17
  -2  -9  -5 1289.49  413.05
   2  -9   5 1646.08  301.99
   2  -9   5 1489.74  554.24
   2   9   6    0.06   72.73
  -2   9  -6   54.65   41.91
   2  -9   6    5.48   54.61
  -2  -9  -6   66.79   46.55
   2  -9   6   38.37   32.35
  -2   9  -7  387.72  334.34
   2   9   7  555.78  337.46
   2  -9   7  429.72  327.44
   2  -9   7  491.11  287.88
  -2  -9  -7  351.83  577.72
   2   9   8   14.27   65.47
  -2   9  -8   16.13   25.96
   2  -9   8   -5.98   71.24
   2  -9   8   36.23   65.88
  -2  -9  -8   -8.34   79.54
   2   9   9  281.94  222.75
   2  -9   9  190.68  126.55
  -2  -9  -9  308.75  146.87
   2 -10  -8   99.34  173.47
  -2 -10   8   42.11   90.40
  -2  10   7   20.62   52.20
  -2 -10   7   29.27   43.92
   2 -10  -7  -64.07  104.20
  -2  10   6  687.19  577.32
   2  10  -6  845.45  536.76
   2 -10  -6  925.25  830.33
  -2 -10   6 1455.44  195.43
   2  10  -5  142.91  120.76
  -2  10   5   66.41   53.11
  -2 -10   5  106.04   78.23
  -2 -10   5  111.13  105.39
   2 -10  -5   -3.21  101.63
  -2  10   4  311.66  110.15
   2  10  -4  240.24  217.35
  -2 -10   4  238.34  227.60
   2 -10  -4  260.75  129.86
  -2 -10   4  233.52  203.48
  -2  10   3   49.38   61.56
   2  10  -3   58.35   61.47
   2 -10  -3   99.64   92.98
  -2 -10   3   23.89   33.45
  -2 -10   3   49.22   70.06
   2  10  -2  492.78  307.03
  -2  10   2  479.84  376.06
  -2 -10   2  683.34  264.35
  -2 -10   2  406.94  305.20
   2 -10  -2  541.12  394.78
   2  10  -1   37.34   49.56
  -2  10   1  103.50   98.54
   2 -10  -1   92.71   66.46
  -2 -10   1  118.16   73.53
  -2 -10   1  108.61   88.32
   2  10   0  181.90   87.63
  -2  10   0  219.60  137.93
  -2 -10   0  259.69  158.02
   2 -10   0   75.65  117.10
   2  10   1  437.34  391.13
  -2  10  -1  645.50  192.13
  -2 -10  -1  460.87  358.83
   2 -10   1  431.71  489.21
   2  10   2  525.78  331.51
  -2  10  -2  502.30  352.80
   2 -10   2  441.12  329.66
   2 -10   2  798.48  248.33
  -2 -10  -2  474.01  440.59
  -2  10  -3   15.31   38.47
   2  10   3   -4.58   47.33
   2 -10   3   36.90   47.25
   2 -10   3    7.73   32.42
  -2 -10  -3   23.04   47.75
  -2  10  -4  625.57  417.59
   2  10   4  579.11  422.43
   2 -10   4  529.42  423.90
   2 -10   4  491.52  346.10
  -2 -10  -4  527.31  305.63
   2  10   5   45.87   64.19
  -2 -10  -5   17.65   68.17
   2 -10   5   16.83   35.80
   2 -10   5   70.34   43.90
  -2 -10  -6  514.78  466.16
   2 -10   6  565.10  388.67
  -2 -10  -7   40.09   93.14
   2 -10   7   -6.55   40.41
  -2 -10  -8  273.66  227.45
   2 -10   8  186.96  123.90
  -2 -11  -1  249.49  153.56
  -2 -11  -2   79.16   72.32
  -2 -11  -3  160.47   72.02
  -2 -11  -4   75.72   94.97
  -2 -11  -5  219.15  110.17
  -2 -11  -6   -0.66   86.30
  -3   0  17   10.27   32.26
  -3   0  17  -12.14   86.84
  -3   0  16  125.55  120.10
  -3   0  16  206.69  200.37
  -3   0  15   -6.55   28.49
  -3   0  15   45.84   61.84
  -3   0  15   21.49   55.94
  -3   0  14  188.25  124.47
  -3   0  14  183.44  139.90
  -3   0  14  208.83  161.04
  -3   0  13   62.96   38.20
  -3   0  13    7.29   18.50
  -3   0  13    9.53   11.59
  -3   0  13  -18.03   61.00
  -3   0  12 1904.62  287.43
  -3   0  12 2291.64  279.06
  -3   0  12 1790.84  433.13
  -3   0  11   13.35   44.91
  -3   0  11    4.25   14.56
  -3   0  11   -1.45   18.21
  -3   0  11   -7.91   70.38
   3   0 -11   -4.70   44.05
  -3   0  11   19.84   34.99
  -3   0  10  547.97   84.61
  -3   0  10  602.54  237.83
  -3   0  10  586.03  330.89
   3   0 -10  561.80  288.77
  -3   0  10  623.10  144.64
  -3   0  10  509.38  271.05
  -3   0   9    9.87   46.76
  -3   0   9    7.64    6.65
  -3   0   9   30.10   23.81
  -3   0   9  -17.56   46.94
   3   0  -9   13.91   33.65
  -3   0   8 5001.32  674.01
  -3   0   8 5141.57  429.90
  -3   0   8 4718.92  396.78
  -3   0   8 5111.13  370.70
   3   0  -8 4003.67  290.62
   3   0  -8 4753.64  392.83
   3   0  -7   -5.22    8.93
  -3   0   7   13.93   33.66
  -3   0   7    5.24   12.45
  -3   0   7   43.72   51.90
   3   0  -7   16.23   28.95
  -3   0   7   92.63   94.16
  -3   0   613126.00  696.25
  -3   0   615075.76  700.54
   3   0  -613438.28  686.52
  -3   0   618359.03  942.09
   3   0  -612347.87  575.89
  -3   0   613494.60  703.29
  -3   0   5   30.68   25.58
  -3   0   5   18.99   24.29
   3   0  -5   24.80   21.00
  -3   0   5   -1.18   30.82
   3   0  -5    6.43    4.42
  -3   0   5    2.98    6.60
   3   0  -4  333.85   52.52
  -3   0   4  437.88  200.96
  -3   0   4  362.55   20.76
  -3   0   4  337.74   73.10
   3   0  -4  307.93   13.85
  -3   0   4  304.79   57.77
  -3   0   3   13.92   23.43
  -3   0   3   13.81   18.59
   3   0  -3   -7.63   24.00
  -3   0   3    5.51   23.93
  -3   0   2 8414.16  449.15
  -3   0   2 8361.73  450.75
   3   0  -2 7489.11  400.32
   3   0  -2 8659.11  464.12
   3   0  -1    3.75    3.02
  -3   0   1   -4.49   18.33
   3   0  -1   26.54   36.26
  -3   0   1   45.66   43.44
   3   0  -1   13.26   27.76
  -3   0   1    5.13    3.70
   3   0   0  473.10   23.59
  -3   0   0  629.88   50.20
   3   0   0  512.86   46.04
  -3   0   0  687.12   37.35
   3   0   0  483.59   54.66
  -3   0   0  545.18   58.57
  -3   0  -1    8.68   12.38
  -3   0  -1    6.35    9.38
   3   0   1   12.06    8.17
   3   0   1    3.27    5.34
  -3   0  -1    3.17   17.85
   3   0   1   16.71   36.25
   3   0   2  505.83   31.60
   3   0   2  436.44   51.62
  -3   0  -2  558.37   58.31
   3   0   2  499.80   31.64
  -3   0  -2  603.95   44.79
  -3   0  -3   15.62   17.52
   3   0   3    7.80   12.50
   3   0   3    7.62   17.12
   3   0   3    6.70    6.44
  -3   0  -3   14.75   17.23
   3   0   4 9982.82  521.83
  -3   0  -410214.04  499.02
   3   0   4 8701.63  436.93
   3   0   411476.22  554.20
  -3   0  -410322.98  530.29
  -3   0  -412359.79  621.91
  -3   0  -5   10.49   10.05
  -3   0  -5    3.54   27.27
   3   0   5    6.75   18.86
  -3   0  -5    7.34   26.08
   3   0   5  -11.62   25.50
   3   0   5   10.37   14.40
  -3   0  -6 4502.68  240.66
   3   0   6 4477.44  241.67
   3   0   6 4437.24  243.51
  -3   0  -6 5654.73  314.53
  -3   0  -6 4776.80  278.76
   3   0   6 4502.89  277.22
   3   0   7    6.91   18.04
   3   0   7   14.01   21.10
   3   0   7   12.91   21.43
  -3   0  -7   -3.60   19.84
  -3   0  -7   29.98   25.89
   3   0   7    0.65   19.27
  -3   0  -810278.15  651.62
   3   0   8 8770.25  583.11
   3   0   8 8864.39  730.64
   3   0   8 9272.69  592.89
   3   0   8 9708.96  620.10
   3   0   9   17.20   16.50
  -3   0  -9   20.28   17.69
   3   0   9   14.76   21.07
   3   0   9   25.89   24.40
   3   0   9    2.98   32.54
   3   0   9    4.92   21.25
   3   0  10 3855.77  442.81
   3   0  10 4290.77  325.34
   3   0  10 4001.44  344.18
  -3   0 -10 3664.65  286.15
   3   0  10 3658.82  318.98
   3   0  10 3858.21  298.41
   3   0  11   14.78   22.71
   3   0  11  -15.53   60.83
   3   0  11    3.54   20.78
   3   0  11   -7.54   43.83
   3   0  11   33.24   38.63
  -3   0 -11   10.43   16.44
  -3   0 -12 1528.25  227.68
   3   0  12 1694.79  255.64
   3   0  12 1733.85  496.64
   3   0  12 1833.86  553.90
  -3   0 -13   34.53   27.64
   3   0  13   17.88   30.67
   3   0  13    8.79   34.66
   3   0  13   39.73   29.37
   3   0  14  110.15   62.80
   3   0  14   73.60   91.32
   3   0  14   88.10   51.79
   3   0  15   12.71   55.44
   3   0  15   26.12   37.88
   3   0  16  263.11  146.92
   3   0  16  239.70  345.72
   3   0  17  100.25   63.43
  -3   1  17   73.80   99.24
  -3   1  17   53.78  100.96
  -3  -1  17   16.01   54.10
  -3   1  16  217.98  137.30
  -3   1  16  132.63  248.65
  -3  -1  16  187.72  177.01
  -3  -1  16  279.04  175.67
  -3   1  15  395.43  372.84
  -3   1  15  245.66  200.38
  -3  -1  15  212.07  194.48
  -3  -1  15  301.03  217.51
  -3  -1  15  229.86  249.80
  -3   1  14   62.77   72.61
  -3   1  14  -12.32   70.08
  -3   1  14   10.48   19.11
  -3  -1  14  -11.85   52.49
  -3  -1  14    1.14   22.88
  -3  -1  14   17.28   39.87
  -3   1  13  944.99  440.52
  -3   1  13 1017.19  204.91
  -3   1  13 1083.74  232.57
   3   1 -13  930.30  165.20
  -3   1  13  940.93  559.37
  -3  -1  13  780.84  341.28
  -3  -1  13 1059.53  323.73
  -3  -1  13 1224.19  237.00
  -3   1  12  347.80  193.82
   3   1 -12  405.20  157.33
  -3   1  12  288.70  186.97
  -3   1  12  294.12  164.70
  -3   1  12  405.46  155.84
  -3   1  12  373.97   65.38
   3   1 -12  509.26  233.88
  -3   1  12  635.70  302.35
  -3  -1  12  392.87  173.90
  -3  -1  12  378.14  141.11
  -3   1  11 1341.90 1001.67
  -3   1  11  898.42   97.50
  -3   1  11  547.51  331.18
   3   1 -11  655.97  214.58
  -3   1  11  804.47  333.03
   3   1 -11  901.11  220.79
  -3   1  11  529.54  113.19
  -3  -1  11  788.62  184.21
  -3  -1  11  664.82  186.73
  -3  -1  11  548.71  279.91
  -3  -1  11  711.32  309.84
   3  -1 -11  821.16  298.14
   3   1 -10 1037.31   98.74
  -3   1  10  897.59  337.02
  -3   1  10  833.18   92.33
   3   1 -10  860.51  269.68
  -3   1  10 1961.35  287.33
  -3   1  10  678.76  239.81
  -3   1  10  661.40   61.07
  -3  -1  10 1004.57  185.43
  -3  -1  10  653.90  388.34
   3  -1 -10  791.27  165.97
  -3  -1  10  907.25  334.28
  -3  -1  10  655.09  294.41
  -3   1   9  902.86  523.33
  -3   1   9  631.47  311.63
   3   1  -9  905.56  332.40
  -3   1   9  737.24   88.72
  -3   1   9  882.19  150.28
   3   1  -9  736.87   53.11
  -3   1   9  742.51  280.72
  -3  -1   9  981.33  343.88
  -3  -1   9  870.68  382.74
  -3  -1   9  608.92  292.75
   3  -1  -9  817.03  285.07
  -3  -1   9  765.80  139.30
  -3   1   8  197.07   71.95
  -3   1   8  345.83  112.68
  -3   1   8  181.45  135.09
  -3   1   8  124.22   65.95
  -3   1   8  227.20   68.75
   3   1  -8  206.20   79.88
   3   1  -8  159.47   62.33
  -3  -1   8  191.19   65.34
   3  -1  -8  205.32   72.90
  -3  -1   8  177.14   70.77
  -3  -1   8  115.47   80.54
  -3  -1   8  238.23  130.63
  -3   1   7  651.94  271.48
  -3   1   7  657.02   31.83
   3   1  -7  841.17  361.47
  -3   1   7  895.48   54.33
  -3   1   7  787.02  136.69
   3   1  -7  580.03   34.97
  -3   1   7  963.36  365.19
  -3  -1   7  758.48  101.93
   3  -1  -7  837.63  203.97
  -3  -1   7  830.98  359.88
  -3  -1   7  909.34  345.83
  -3  -1   7  881.51   64.11
  -3   1   6  106.79   41.40
  -3   1   6  103.98   44.23
  -3   1   6  110.28   49.91
  -3   1   6  130.79   39.42
   3   1  -6  125.62   54.08
   3   1  -6  123.85   51.41
   3   1  -6  135.79   38.41
   3  -1  -6  171.01   74.46
  -3  -1   6  116.59   59.38
  -3  -1   6  150.65   65.64
   3  -1  -6  154.81   72.46
  -3  -1   6  132.77   38.00
   3   1  -5   29.60   38.77
   3   1  -5   32.33   28.89
  -3   1   5   35.74   16.45
   3   1  -5   27.23    9.44
  -3   1   5   27.16   49.23
  -3   1   5   30.74   23.24
  -3   1   5   36.18   14.83
  -3  -1   5   20.52   28.20
  -3  -1   5   34.70   11.37
  -3  -1   5  -13.10   69.45
   3  -1  -5   13.33   19.99
   3  -1  -5   37.38   27.37
   3   1  -4  193.19   30.85
   3   1  -4  216.13   93.95
  -3   1   4  296.56  116.98
   3   1  -4  226.71   96.62
  -3   1   4  193.76   46.78
  -3   1   4  150.49   12.61
  -3   1   4  189.31   64.84
  -3  -1   4  254.54   99.39
  -3  -1   4  147.06   68.80
  -3  -1   4  258.20   82.46
   3  -1  -4  212.09   75.15
   3  -1  -4  150.35   66.74
   3   1  -310040.32  522.12
  -3   1   312444.33  655.17
  -3   1   311719.49  554.99
   3   1  -311981.80  611.45
  -3   1   312987.01  663.65
   3   1  -310890.09  520.24
   3  -1  -3 9986.74  534.86
  -3  -1   311790.51  564.05
  -3  -1   310940.09  564.58
   3  -1  -311511.95  604.12
  -3  -1   310963.26  569.17
  -3   1   2  843.82   69.51
   3   1  -2  732.02   42.08
  -3   1   2  766.82   30.80
   3   1  -2  651.96  132.49
  -3   1   2  765.81  127.99
   3   1  -2  673.12   64.31
   3  -1  -2  779.05   32.72
   3  -1  -2  790.77  136.73
  -3  -1   2  869.66  147.51
   3  -1  -2  775.75   98.82
  -3  -1   2  613.13   68.87
  -3  -1   2  711.94   34.69
   3   1  -1 4304.84  219.23
  -3   1   1 4126.36  236.98
   3   1  -1 4174.90  250.70
   3   1  -1 4135.59  230.22
  -3   1   1 4400.05  253.41
  -3   1   1 4095.94  202.08
   3  -1  -1 4302.04  214.79
   3  -1  -1 3834.10  224.24
  -3  -1   1 3891.78  217.66
  -3  -1   1 4698.29  280.26
   3  -1  -1 4215.40  245.78
  -3  -1   1 4584.79  230.59
   3   1   0 9557.27  471.50
  -3   1   010785.20  546.28
   3   1   0 9957.84  484.84
  -3   1   010599.62  537.08
   3   1   0 9678.45  511.11
   3  -1   010264.02  531.05
   3  -1   011109.39  534.44
   3  -1   0 9728.88  495.23
  -3  -1   0 9768.38  482.48
  -3  -1   010316.00  536.30
  -3  -1   0 9921.50  481.87
   3   1   120943.73 1032.34
   3  -1   122480.51 1090.48
  -3  -1  -122817.17 1113.67
  -3   1  -2 1631.38  164.75
   3   1   2 1452.27   81.49
   3   1   2 1540.60  122.42
  -3   1  -2 1654.80  110.56
   3   1   2 1474.90   98.76
   3   1   2 1585.82  120.03
   3  -1   2 1400.12   99.62
  -3  -1  -2 1460.21  117.31
  -3  -1  -2 1456.18   82.22
   3  -1   2 1525.17  114.19
   3  -1   2 1300.19   79.06
  -3   1  -3 7769.52  414.04
  -3   1  -3 6045.56  304.11
  -3   1  -3 7838.54  399.15
   3   1   3 7649.52  418.06
   3   1   3 9988.17  501.42
   3   1   3 7867.07  407.73
  -3  -1  -3 7932.87  416.67
   3  -1   3 7512.53  401.86
   3  -1   3 7611.60  393.79
   3  -1   3 6304.42  316.52
  -3   1  -4 1414.77  111.58
  -3   1  -4  832.26   49.00
  -3   1  -4 1163.89  135.17
   3   1   4 1064.70   98.09
   3   1   4 1224.54   93.49
   3  -1   4 1055.38  102.62
   3  -1   4  896.73   60.27
   3  -1   4 1080.92   89.36
  -3  -1  -4 1196.09  117.06
   3   1   5 2279.89  107.44
  -3   1  -5 1681.76   93.99
  -3   1  -5 2425.75  167.44
   3   1   5 2403.06  166.92
   3   1   5 2358.19  102.05
   3   1   5 2346.64   64.66
  -3   1  -5 2412.69  150.27
  -3  -1  -5 2413.25  157.67
   3  -1   5 1971.41  109.87
   3  -1   5 1992.55  123.85
   3  -1   5 2177.27  150.01
  -3  -1  -5 2022.94  116.40
   3   1   6    6.04   19.77
   3   1   6    0.00   11.79
  -3   1  -6   -1.17   23.04
   3   1   6    5.93    7.82
  -3   1  -6   32.44   24.52
   3   1   6   22.63   19.14
  -3   1  -6    7.47   12.09
  -3  -1  -6   12.49   19.97
   3  -1   6    6.02   16.66
  -3  -1  -6   17.78   40.67
   3  -1   6    3.56   16.10
   3  -1   6   20.36   28.36
   3   1   7 2507.65  200.02
  -3   1  -7 2347.94  196.87
  -3   1  -7 2609.51  218.33
   3   1   7 2649.77  237.77
   3   1   7 2544.08  202.72
   3   1   7 2167.94  188.25
   3  -1   7 2443.68  288.89
   3  -1   7 2053.96  173.58
   3  -1   7 2514.82  223.69
   3  -1   7 2326.04  213.38
  -3  -1  -7 2369.85  213.74
  -3  -1  -7 2086.04  176.06
   3   1   8   12.80   22.50
   3   1   8   19.81   32.83
   3   1   8   13.44   20.64
   3   1   8   19.93   15.94
   3   1   8   15.17   16.13
  -3   1  -8    9.86   16.46
  -3   1  -8    6.30   26.18
   3  -1   8   12.02   19.96
   3  -1   8   -2.59   34.18
   3  -1   8   10.76   12.60
   3  -1   8    4.34   22.66
   3   1   9 1116.75  138.44
  -3   1  -9 1183.34  142.79
   3   1   9  987.77  135.65
   3   1   9 1158.57  141.73
   3   1   9 1340.29  231.83
   3   1   9 1229.47  139.32
   3   1   9 1225.01  151.94
  -3   1  -9 1275.65  134.63
   3  -1   9 1051.73  309.27
   3  -1   9 1210.29  187.04
   3  -1   9 1223.94  468.58
   3  -1   9 1079.21  144.91
   3   1  10  281.51   93.15
   3   1  10  258.32  104.01
   3   1  10  225.91  101.93
  -3   1 -10  396.53  135.48
  -3   1 -10  272.02  118.57
   3   1  10  196.72  111.50
   3   1  10  196.47  119.38
   3   1  10  239.23  123.86
   3  -1  10  166.37  142.52
   3  -1  10  208.44   93.03
   3  -1  10  208.35   77.87
   3  -1  10  243.03   85.77
   3   1  11 1571.73  180.38
   3   1  11 1789.81  237.73
  -3   1 -11 2092.11  305.17
   3   1  11 1538.52  202.08
   3   1  11 1600.30  278.22
   3   1  11 1728.80  364.31
   3   1  11 2252.38  394.86
   3  -1  11 1824.40  258.10
   3  -1  11 1761.78  320.09
   3  -1  11 1780.92  330.26
   3   1  12  155.89  121.83
   3   1  12   90.34   79.46
   3   1  12  210.79  152.08
   3   1  12   95.53   55.00
  -3   1 -12  187.18   72.86
   3  -1  12  152.17   58.54
   3  -1  12  145.63   84.41
   3  -1  12   87.66   79.95
   3   1  13 1586.64  284.72
   3   1  13 1562.77  361.55
   3   1  13 1406.50  296.25
  -3   1 -13 1360.00  519.82
   3  -1  13  730.24  589.96
   3  -1  13 1363.13  390.06
   3  -1  13 1537.56  303.94
  -3   1 -14  181.66   63.81
   3   1  14  126.84   86.80
   3   1  14  117.44   53.84
   3   1  14  130.08  108.58
   3  -1  14   94.16  106.32
   3  -1  14  132.30   95.63
  -3   1 -15   82.98   42.26
   3   1  15   61.30  110.54
   3   1  15   66.50   60.75
   3  -1  15  144.31   72.52
   3   1  16  146.95  151.58
   3   1  16  158.09  230.64
   3  -1  16  166.26  132.19
   3   1  17  158.56  172.58
   3   1  17  201.04  258.63
   3  -1  17  242.51  234.66
  -3   2  17   33.30   95.29
  -3  -2  17   40.73   53.99
  -3   2  16   18.98   57.23
  -3   2  16  112.00   67.02
  -3  -2  16   19.61   73.94
  -3  -2  16   97.43   84.59
   3   2 -15   34.63   22.35
  -3   2  15   -1.67   67.10
  -3   2  15  -24.60   49.75
  -3  -2  15   39.31   62.52
  -3  -2  15   45.67   61.77
  -3   2  14 2069.95  345.94
  -3   2  14 1703.50  302.88
  -3   2  14 1335.98  553.50
   3   2 -14 2032.35  333.84
  -3  -2  14 1453.80  309.00
  -3  -2  14 1553.86  328.30
  -3   2  13  502.55  200.98
  -3   2  13  352.87  190.44
  -3   2  13  224.77  208.77
   3   2 -13  633.51  207.38
  -3   2  13  446.57  341.60
  -3   2  13  353.64  138.90
  -3  -2  13  388.55  359.18
  -3  -2  13  433.99  273.46
  -3  -2  13  390.29  211.79
   3   2 -12  286.46   81.75
   3   2 -12  241.79   83.01
  -3   2  12  341.98  200.99
  -3   2  12  155.59  112.76
  -3   2  12  219.00  130.36
  -3   2  12  147.48  100.59
  -3   2  12  220.33  154.71
  -3  -2  12  212.55  110.14
  -3  -2  12  223.46  110.15
  -3   2  11   17.81   42.84
  -3   2  11   66.58   31.45
  -3   2  11   68.24   69.55
   3   2 -11   46.75   18.18
   3   2 -11   82.77   37.74
  -3   2  11   81.86   33.19
  -3   2  11   68.06   37.70
  -3   2  11   25.02   46.65
  -3  -2  11   72.98   32.67
  -3  -2  11   80.76   50.16
   3   2 -10 3640.82  326.65
  -3   2  10 3100.30  217.54
   3   2 -10 2902.81  219.35
  -3   2  10 4128.32  314.25
   3   2 -10 3881.45  348.54
  -3   2  10 3796.71  335.20
  -3   2  10 4498.73  403.34
  -3   2  10 3181.74  271.28
   3  -2 -10 3861.19  301.86
  -3  -2  10 4179.99  321.16
  -3  -2  10 3367.97  315.85
  -3  -2  10 3450.78  454.11
  -3   2   9 1224.22  305.83
  -3   2   9 1684.34  277.55
   3   2  -9 1083.26   81.54
   3   2  -9 1789.92  602.57
   3   2  -9 1595.83  377.07
  -3   2   9 1355.73  116.39
  -3   2   9 1846.62  506.41
  -3   2   9 1516.17  139.05
  -3  -2   9 1546.62  467.17
   3  -2  -9 1407.63  246.07
  -3  -2   9 1644.05  163.54
  -3  -2   9 1339.68  472.62
  -3   2   8  392.68  178.35
  -3   2   8  565.35   48.31
   3   2  -8  552.44  179.84
   3   2  -8 1475.89  170.89
  -3   2   8  676.35  301.94
   3   2  -8  522.57  219.75
  -3   2   8  549.11  115.56
  -3  -2   8  524.16   91.35
   3  -2  -8  523.00  124.40
  -3  -2   8  422.71  134.88
   3  -2  -8  839.50  301.66
  -3  -2   8  336.88  189.77
  -3   2   7  109.99   55.11
  -3   2   7   47.34   50.55
  -3   2   7  129.92   53.18
  -3   2   7   69.63   31.85
   3   2  -7  102.88   37.64
   3   2  -7  114.36   77.62
   3   2  -7  101.08   55.65
   3  -2  -7  150.70   76.76
  -3  -2   7   73.18   64.48
  -3  -2   7  123.98   47.58
   3  -2  -7  122.21   45.18
  -3  -2   7  182.45   74.65
  -3   2   6 1226.63   59.29
  -3   2   6 1428.91  124.72
   3   2  -6 1326.47  138.49
  -3   2   6 1653.40  379.54
   3   2  -6 1283.87   73.56
   3   2  -6 1319.66  464.17
  -3   2   6 1381.35   96.88
  -3  -2   6 1442.58  175.81
   3  -2  -6 1544.62  139.37
  -3  -2   6 1575.62  133.74
  -3  -2   6 1379.74  119.81
   3  -2  -6 1339.75  219.10
  -3   2   5 8898.91  440.27
   3   2  -5 9328.47  509.57
   3   2  -5 9554.43  520.57
  -3   2   5 9542.70  496.76
  -3   2   510087.96  604.55
   3   2  -5 9984.91  484.65
  -3  -2   5 9752.79  478.11
  -3  -2   5 8438.89  468.16
   3  -2  -5 8751.60  497.40
   3  -2  -5 9290.48  451.51
   3  -2  -5 8821.52  442.81
  -3   2   411989.19  599.55
   3   2  -411493.85  600.73
   3   2  -411130.19  534.28
  -3   2   411752.66  619.62
  -3   2   411273.74  538.79
   3   2  -410067.63  589.52
  -3  -2   4 9989.12  527.77
   3  -2  -4 9747.09  484.65
  -3  -2   411034.84  581.24
   3  -2  -412216.09  579.63
   3  -2  -411054.57  593.71
  -3  -2   411479.54  557.43
  -3   2   3  456.56   50.98
   3   2  -3  486.34  175.48
  -3   2   3  405.19   38.82
   3   2  -3  642.01  260.70
   3   2  -3  409.12   38.58
  -3   2   3  446.48  234.63
   3  -2  -3  338.38   40.57
   3  -2  -3  531.04  179.02
  -3  -2   3  460.94  199.06
   3  -2  -3  447.07   34.35
  -3  -2   3  476.06   64.50
  -3  -2   3  501.00  209.24
   3   2  -2  295.42  182.90
   3   2  -2  174.66   70.82
   3   2  -2  217.75   81.05
  -3   2   2  168.56   55.47
  -3   2   2  212.80   89.17
  -3   2   2  222.51   93.14
   3  -2  -2  129.43   47.67
  -3  -2   2  201.47   77.45
  -3  -2   2  142.42   61.10
   3  -2  -2  187.04  101.58
  -3  -2   2  141.33   54.60
   3  -2  -2  215.24   85.97
  -3   2   1  103.77   44.16
   3   2  -1   63.53   25.03
   3   2  -1   55.55   27.39
  -3   2   1   73.50   21.67
  -3   2   1   53.07   25.25
   3   2  -1   71.82   27.17
   3  -2  -1   72.39   47.20
  -3  -2   1   39.55   26.76
   3  -2  -1   80.02   30.92
   3  -2  -1   78.91   42.84
  -3  -2   1   78.15   31.14
  -3  -2   1   74.19   33.65
  -3   2   0 3011.84  171.90
  -3   2   0 2880.10  195.36
   3   2   0 2661.54  183.64
  -3   2   0 2811.18  165.78
   3   2   0 2732.25  183.87
   3   2   0 2693.59  159.16
  -3  -2   0 2816.82  173.97
   3  -2   0 2709.15  167.30
  -3  -2   0 2969.85  272.48
   3  -2   0 2649.57  157.06
   3  -2   0 2746.16  183.94
  -3  -2   0 2760.37  174.25
  -3   2  -1 2031.17  121.97
   3   2   1 2181.49  159.60
  -3   2  -1 2195.35  155.45
   3   2   1 2134.01  131.06
  -3   2  -1 2081.65  135.33
   3   2   1 2180.33  137.29
   3  -2   1 2001.68  136.12
  -3  -2  -1 2045.38  151.27
  -3  -2  -1 2105.42  129.39
   3  -2   1 2013.19  175.94
   3  -2   1 2308.62  139.34
  -3  -2  -1 2073.42  149.79
  -3   2  -2  613.34   42.17
   3   2   2  831.86   57.47
   3   2   2  757.48   58.49
  -3   2  -2  756.77   69.24
  -3   2  -2  713.11   58.88
   3   2   2  688.56   71.69
   3  -2   2  797.63   58.62
  -3  -2  -2  714.57   66.50
   3  -2   2  742.96  157.94
  -3  -2  -2  804.01   60.12
   3  -2   2  747.02   69.91
  -3  -2  -2  827.88  123.94
  -3   2  -3  556.88   60.12
  -3   2  -3  415.88   34.04
  -3   2  -3  847.24   82.51
   3   2   3  591.26   80.04
   3   2   3  565.92   71.66
   3   2   3  605.46  132.11
   3  -2   3  560.70   63.38
   3  -2   3  529.51   60.59
  -3  -2  -3  600.39   63.14
  -3  -2  -3  535.66   59.88
  -3  -2  -3  580.34   82.69
   3  -2   3  668.07   59.32
   3   2   4  797.34   95.96
   3   2   4  706.12   66.67
  -3   2  -4  809.79   90.47
   3   2   4  810.31   73.37
   3   2   4  716.67   64.25
  -3   2  -4  665.44   63.31
  -3   2  -4  698.83   81.80
  -3  -2  -4  946.14  171.13
   3  -2   4  749.44   82.90
   3  -2   4  977.05  156.99
  -3  -2  -4  856.43   60.97
   3  -2   4  665.22   70.73
  -3   2  -5 1104.05   93.38
   3   2   5 1256.16   87.95
  -3   2  -5 1325.58  108.84
   3   2   5 1235.09  166.59
   3   2   5 1470.88  106.47
   3   2   5 1378.85  124.10
  -3  -2  -5 1308.42   81.41
   3  -2   5 1353.47  116.45
   3  -2   5 1390.78  143.17
  -3  -2  -5 1323.79  100.77
   3  -2   5 1415.87  134.74
   3   2   6 3717.58  300.37
   3   2   6 3652.58  266.72
   3   2   6 3973.61  288.14
   3   2   6 5073.73  386.92
  -3   2  -6 4080.59  322.60
   3   2   6 3531.27  278.82
  -3   2  -6 3340.18  253.49
  -3  -2  -6 4085.40  314.23
   3  -2   6 4224.05  321.83
   3  -2   6 3596.45  311.86
   3  -2   6 3715.59  305.09
   3  -2   6 3774.61  411.99
  -3   2  -7  277.08  117.92
   3   2   7  223.70   76.99
  -3   2  -7  123.28   45.63
   3   2   7  156.13   66.38
   3   2   7  240.32   61.85
   3   2   7  140.86   73.66
   3   2   7  234.66   97.63
   3  -2   7  194.82   39.18
  -3  -2  -7  199.74   76.37
   3  -2   7  271.28  124.41
   3  -2   7  189.03   80.13
   3  -2   7  212.57   70.93
   3   2   8  901.13   74.74
   3   2   8  890.19  169.59
   3   2   8  949.94  321.21
  -3   2  -8  726.10   87.61
  -3   2  -8  968.76  115.81
   3   2   8  909.26  252.92
   3   2   8  981.71  167.94
   3  -2   8  824.48  391.92
   3  -2   8 1187.40  148.50
   3  -2   8  974.46  132.37
   3  -2   8  907.01  110.43
   3   2   9  839.85  251.37
  -3   2  -9 1074.48  391.94
   3   2   9  988.04   87.31
   3   2   9  929.78  301.06
   3   2   9 1045.53  214.54
   3   2   9 1093.80  104.94
  -3   2  -9  828.03   89.26
   3   2   9  921.49  338.25
   3  -2   9 1193.72  375.25
   3  -2   9  963.83  127.59
   3  -2   9  806.71  363.95
   3  -2   9  811.39  112.05
   3   2  10 3424.43  211.08
   3   2  10 3112.93  165.86
   3   2  10 3813.07  161.98
   3   2  10 3513.14  203.78
   3   2  10 2768.04  234.11
  -3   2 -10 2974.23  148.26
  -3   2 -10 3651.80  194.30
   3   2  10 3517.49  144.93
   3  -2  10 3927.95  184.03
   3  -2  10 3300.61  247.11
   3  -2  10 3329.71  309.68
  -3   2 -11  276.62  207.58
   3   2  11  177.93  111.03
   3   2  11  177.17  122.18
   3   2  11  193.15  106.51
  -3   2 -11  261.61   70.66
   3   2  11  246.99  124.33
   3   2  11  185.85   73.71
   3  -2  11  245.64  115.63
   3  -2  11  261.21  136.69
  -3   2 -12 1668.49  204.29
   3   2  12 1358.51  196.12
   3   2  12 1245.24  146.27
   3   2  12 1370.64  652.98
   3   2  12 1429.01  342.57
   3   2  12 1384.88  207.24
  -3   2 -12 1574.50  271.72
   3  -2  12 1534.98  225.37
   3  -2  12 1443.43  366.44
   3   2  13   28.79   39.68
   3   2  13   13.69   32.00
   3   2  13    8.23   21.81
  -3   2 -13   42.79   33.55
   3  -2  13   16.99   31.46
   3  -2  13   25.26   40.55
   3  -2  13   46.04   53.42
  -3   2 -14 1749.36  227.63
   3   2  14 1261.29  272.22
   3   2  14 1600.10  273.67
   3  -2  14 1658.73  228.31
   3  -2  14 1343.50  560.89
   3   2  15   52.06   52.96
   3   2  15   65.61   84.66
  -3   2 -15   68.08   35.92
   3  -2  15   70.85   76.08
   3  -2  15   51.02   83.07
   3   2  16   61.68   91.45
  -3   2 -16  151.55   76.90
   3   2  16  105.13   86.56
   3   2  17   21.80   49.82
  -3   2 -17   24.45   47.04
  -3   3  16  -11.65   51.48
  -3  -3  16   21.58   64.89
  -3   3  15  281.65  405.47
  -3  -3  15  512.59  413.71
  -3  -3  15  605.35  516.33
  -3   3  14    3.76   24.33
  -3   3  14   -1.38   39.73
  -3   3  14   29.38   48.23
   3   3 -14   -2.67   22.93
  -3  -3  14   16.54   23.61
  -3  -3  14   28.50   53.06
  -3   3  13  254.35  191.95
   3   3 -13  382.97  153.05
  -3   3  13  215.51  184.37
  -3   3  13  312.95  226.43
  -3  -3  13  233.52  127.01
  -3  -3  13  320.01  225.61
  -3  -3  13  372.87  131.02
   3   3 -12   40.19   29.00
  -3   3  12   27.54   22.15
  -3   3  12   38.49   27.83
   3   3 -12   29.09   19.68
  -3   3  12   36.28   51.64
  -3   3  12   32.02   28.87
  -3   3  12   16.88   25.82
  -3  -3  12    6.15   33.52
  -3  -3  12   26.09   53.91
  -3   3  11  775.91  434.83
   3   3 -11  702.19  179.10
   3   3 -11  690.34  200.50
  -3   3  11  811.99  186.41
  -3   3  11  599.57  160.41
  -3   3  11  786.01  113.77
  -3   3  11  735.08  470.13
  -3   3  11 1207.99  300.51
  -3  -3  11  725.67  298.89
  -3  -3  11  907.85  354.00
   3   3 -10   17.73   18.80
  -3   3  10   21.70   22.26
  -3   3  10   22.76   38.21
  -3   3  10   15.69   25.82
  -3   3  10   10.71   18.00
   3   3 -10   19.65   35.91
  -3   3  10   25.50   47.55
   3  -3 -10   28.92   74.09
  -3  -3  10    9.53   29.26
  -3  -3  10   33.33   37.74
  -3   3   9  838.25  400.33
  -3   3   9  844.34   96.39
  -3   3   9  849.79  227.54
  -3   3   9 1252.17  199.26
   3   3  -9  816.12  491.79
  -3   3   9  830.86  103.20
   3   3  -9 1075.71  340.85
   3   3  -9  941.78   67.29
  -3  -3   9 1015.04  259.61
   3  -3  -9 1078.17  456.50
  -3  -3   9  892.28  198.97
  -3  -3   9  764.56  414.63
  -3   3   8 1288.42  122.00
   3   3  -8  966.04   96.91
  -3   3   8 1231.83  219.47
  -3   3   8 1471.20  322.26
   3   3  -8 1366.10  501.76
   3   3  -8  989.36  521.89
  -3   3   8 1149.08  212.73
  -3  -3   8 1064.03  452.16
   3  -3  -8 1364.89  499.63
  -3  -3   8 1294.33  215.93
  -3  -3   8 1183.38  386.00
   3  -3  -8 1254.89  124.42
   3   3  -7 8308.73  581.80
   3   3  -7 7739.65  485.78
   3   3  -7 9213.11  634.09
  -3   3   7 8654.80  603.32
  -3   3   7 8095.86  513.80
  -3   3   7 8479.92  567.22
   3  -3  -7 8128.07  659.52
  -3  -3   7 7106.37  544.08
   3  -3  -7 8285.47  518.54
   3  -3  -7 8983.77  602.37
  -3  -3   7 7473.60  539.17
  -3  -3   7 8764.24  558.54
  -3   3   610986.66  793.95
   3   3  -610429.40  791.83
   3   3  -611367.17  857.60
  -3   3   610652.55  768.25
  -3   3   612115.75  910.15
   3   3  -611447.62  818.43
  -3  -3   610778.54  820.31
   3  -3  -610809.44  770.61
   3  -3  -611109.86  789.39
  -3  -3   611157.20  818.46
  -3  -3   6 9556.73  735.05
   3  -3  -6 9882.18  764.57
  -3   3   5 8948.23  703.54
  -3   3   5 8771.83  623.64
  -3   3   5 8429.02  616.06
   3   3  -5 8750.73  624.57
   3   3  -5 8539.57  645.47
   3   3  -5 8719.63  657.58
  -3  -3   5 8022.59  610.13
   3  -3  -5 8755.12  670.59
   3  -3  -5 8627.89  602.49
   3  -3  -5 9120.66  643.48
  -3  -3   5 9008.03  656.02
  -3   3   4  983.40  332.62
   3   3  -4  794.37   74.67
  -3   3   4  919.76   99.98
   3   3  -4 1099.47  118.74
  -3   3   4  886.57   72.97
   3   3  -4 1022.24  174.97
  -3  -3   4  926.48  139.26
  -3  -3   4  955.92  104.84
  -3  -3   4  849.02  101.61
   3  -3  -4  912.19  108.52
   3  -3  -4  734.76   51.53
   3  -3  -4  876.59   69.27
  -3   3   3 5907.18  356.95
   3   3  -3 5403.62  290.33
   3   3  -3 4965.43  300.48
   3   3  -3 5567.31  366.96
  -3   3   3 5861.18  298.43
  -3   3   3 5489.83  290.71
  -3  -3   3 6294.25  385.25
  -3  -3   3 5001.39  331.64
   3  -3  -3 5709.60  295.25
  -3  -3   3 5105.23  282.64
   3  -3  -3 5639.09  296.18
   3  -3  -3 5505.82  343.63
  -3   3   2  942.26   63.56
   3   3  -2  909.83  110.84
  -3   3   2 1116.15  111.72
   3   3  -2  702.38   72.99
  -3   3   2  882.20   83.12
   3   3  -2  867.72   89.97
  -3  -3   2  835.69  138.03
   3  -3  -2  888.09  108.25
  -3  -3   2  834.81   94.23
  -3  -3   2  938.88  111.85
   3  -3  -2  946.04   73.26
   3  -3  -2  948.70   73.72
   3   3  -113785.56  707.40
   3   3  -115823.62  814.17
  -3   3   113290.44  667.51
  -3   3   113641.33  670.60
  -3   3   114828.00  778.09
   3   3  -113522.72  675.16
   3  -3  -113672.20  719.74
   3  -3  -114013.22  698.11
  -3  -3   114569.56  760.20
  -3  -3   114389.61  710.93
  -3  -3   114084.44  724.47
   3  -3  -115072.03  743.59
  -3   3   0  278.52  104.05
   3   3   0  313.91   60.65
  -3   3   0  260.79   57.70
   3   3   0  433.82   87.18
   3   3   0  271.58  111.43
  -3   3   0  445.26  189.09
  -3  -3   0  326.53   83.86
   3  -3   0  263.31  130.24
  -3  -3   0  338.42  173.12
  -3  -3   0  346.85  130.18
   3  -3   0  302.42   45.71
   3  -3   0  334.73  117.12
   3   3   1 9797.40  523.41
  -3   3  -110402.93  535.49
   3   3   1 8494.91  443.24
  -3   3  -1 9187.88  507.84
  -3   3  -1 8852.27  454.91
   3   3   1 8157.26  442.89
   3  -3   1 8344.19  430.50
  -3  -3  -1 8778.19  476.64
  -3  -3  -1 8336.07  442.58
   3  -3   1 8723.66  481.66
   3  -3   1 8240.71  433.49
  -3  -3  -1 9031.34  481.18
  -3   3  -2 2397.05  179.69
  -3   3  -2 2205.09  144.05
   3   3   2 2196.76  186.41
  -3   3  -2 2061.40  127.62
   3   3   2 2129.99  152.97
   3   3   2 2273.88  166.25
  -3  -3  -2 2113.54  128.54
   3  -3   2 2081.17  126.43
  -3  -3  -2 2258.86  197.43
   3  -3   2 2109.66  154.35
   3  -3   2 1902.81  127.26
  -3  -3  -2 2062.94  137.46
  -3   3  -3 8336.29  420.68
  -3   3  -3 9057.56  487.97
  -3   3  -3 7802.76  405.86
   3   3   3 8756.91  461.33
   3   3   3 9212.06  464.90
   3   3   3 8937.27  478.09
  -3  -3  -3 9158.33  466.16
   3  -3   3 9810.95  501.80
   3  -3   3 9134.55  525.87
   3  -3   3 8695.87  459.74
  -3  -3  -3 8936.74  463.50
  -3  -3  -3 8722.06  440.87
   3   3   4 1815.11  174.00
  -3   3  -4 1426.55   92.40
   3   3   4 1966.83  119.94
   3   3   4 1881.70  150.29
  -3   3  -4 1729.86  195.73
  -3  -3  -4 1742.36  113.56
   3  -3   4 1956.35  137.40
  -3  -3  -4 1838.55  130.30
   3  -3   4 1848.83  131.47
   3  -3   4 1929.77  142.79
  -3  -3  -4 2010.15  132.35
   3  -3   4 1705.68  183.43
   3   3   510218.33  719.58
   3   3   5 8853.22  655.50
  -3   3  -5 6420.05  458.67
   3   3   5 9018.66  659.69
  -3   3  -5 9530.78  702.48
   3  -3   510757.30  770.42
   3  -3   5 8929.30  663.28
   3  -3   5 8553.38  633.65
   3  -3   5 8333.56  630.84
  -3  -3  -510230.02  734.11
  -3  -3  -5 9112.50  650.44
  -3  -3  -5 9614.60  680.32
  -3   3  -6  976.97  109.39
   3   3   6  812.45   83.17
   3   3   6  839.67   82.67
   3   3   6  866.57  250.78
  -3   3  -6  753.35   64.78
   3   3   6  983.69  242.51
   3  -3   6 1090.89  341.05
  -3  -3  -6  787.43  122.76
   3  -3   6  883.65  355.21
   3  -3   6 1094.65  129.24
  -3  -3  -6  787.92   79.63
   3  -3   6  873.81   96.94
  -3   3  -7 4708.37  358.07
   3   3   7 4946.94  344.15
   3   3   7 4204.11  356.37
   3   3   7 3965.60  292.16
   3   3   7 4554.54  371.33
  -3  -3  -7 4418.45  322.62
  -3  -3  -7 4512.64  308.36
   3  -3   7 3922.99  306.62
   3  -3   7 4194.36  345.72
   3  -3   7 4985.36  428.59
   3  -3   7 4066.60  442.46
   3   3   8 1201.08  216.75
   3   3   8 1588.96  201.17
   3   3   8 1124.82  171.38
   3   3   8 1016.82  232.32
  -3   3  -8 1158.53  429.82
  -3   3  -8 1128.93   90.50
   3  -3   8 1049.28  130.39
  -3  -3  -8 1110.86   80.94
   3  -3   8 1063.88  356.18
   3  -3   8 1166.85  177.39
   3  -3   8 1409.10  176.96
   3   3   9 3999.17  322.89
   3   3   9 2922.02  246.85
  -3   3  -9 3863.18  333.27
  -3   3  -9 2459.37  192.22
   3   3   9 3469.66  279.98
   3   3   9 3591.65  286.72
   3   3   9 3169.44  560.32
   3   3   9 3637.92  468.88
   3  -3   9 4208.10  346.56
   3  -3   9 3140.08  396.52
   3  -3   9 3190.82  312.80
  -3   3 -10  440.82  128.88
   3   3  10  396.51  285.38
   3   3  10  605.25  124.93
  -3   3 -10  562.65  311.66
   3   3  10  601.68  296.68
   3   3  10  472.66  261.53
   3   3  10  516.66  132.84
   3  -3  10  467.40  227.95
   3  -3  10  521.81  182.52
   3   3  11  376.56  146.60
   3   3  11  118.89  145.19
   3   3  11  304.18  179.34
  -3   3 -11  324.52   95.73
  -3   3 -11  342.53  197.14
   3   3  11  234.45  154.80
   3   3  11  240.44  190.98
   3  -3  11  264.23  145.05
   3  -3  11  282.51  186.98
   3   3  12   23.53   36.22
  -3   3 -12   28.95   24.85
   3   3  12   51.16   54.21
   3   3  12   16.33   43.18
  -3   3 -12   21.50   35.42
   3   3  12   15.98   29.94
   3   3  12   45.54   43.24
   3  -3  12   40.94   46.55
   3  -3  12   36.44   39.50
   3   3  13  306.57  150.51
  -3   3 -13  473.47  195.16
   3   3  13  380.57  192.07
   3   3  13  386.84  135.13
   3  -3  13  295.37  215.11
   3  -3  13  435.85  125.29
  -3   3 -14  222.00   95.29
   3   3  14  225.45  114.51
   3   3  14  152.92  105.18
   3  -3  14  106.04  119.34
  -3   3 -15 1069.64  593.75
   3   3  15  701.01  471.74
   3   3  15 1030.92  359.13
   3  -3  15  829.99  572.46
   3  -3  15 1298.35  247.64
  -3   3 -16   66.60   55.42
   3   3  16   76.96   71.43
  -3   4  16  372.73  766.96
  -3   4  15   96.72  129.93
  -3  -4  15   89.66  125.97
   3   4 -14  131.17   58.70
  -3   4  14   94.45   57.45
  -3   4  14   68.10   50.63
  -3  -4  14  123.72   73.68
  -3  -4  14  110.41   87.94
  -3   4  13   21.05   35.40
   3   4 -13   38.87   16.24
  -3   4  13   10.45   22.55
  -3   4  13   63.77   47.07
  -3  -4  13   12.55   26.83
  -3  -4  13    6.43   43.03
  -3   4  12 2532.33  601.11
  -3   4  12 2809.47  477.78
  -3   4  12 2442.79  413.08
   3   4 -12 2296.25  846.75
  -3   4  12 2698.58  456.40
   3   4 -12 2038.27  339.63
  -3  -4  12 2919.16  599.89
  -3  -4  12 2539.68 1046.50
  -3   4  11  799.86  137.54
  -3   4  11  741.25  143.74
  -3   4  11  669.61  185.12
  -3   4  11  855.47  227.99
   3   4 -11 2222.39  738.97
   3   4 -11  750.36  295.92
  -3  -4  11  541.31  349.26
  -3  -4  11  784.63  363.76
   3  -4 -11  828.84  384.05
  -3   4  10 2626.23  323.32
  -3   4  10 2786.04  543.92
  -3   4  10 3485.52  416.79
  -3   4  10 3166.33  390.69
   3   4 -10 2398.79  287.46
  -3   4  10 2695.70  341.10
   3   4 -10 2782.66  393.51
   3  -4 -10 2664.53  380.99
  -3  -4  10 2953.08  742.89
  -3  -4  10 3060.81  414.32
  -3   4   9 2073.46  260.34
   3   4  -9 2167.03  197.34
   3   4  -9 1563.79   82.84
  -3   4   9 2189.68  130.36
  -3   4   9 1845.82  157.87
  -3   4   9 1985.02  107.79
  -3   4   9 1910.27  101.68
  -3  -4   9 2086.06  359.62
  -3  -4   9 2018.98  236.17
   3  -4  -9 1817.99  292.09
   3   4  -811500.78  837.89
  -3   4   811754.07  805.01
   3   4  -810629.41  716.46
  -3   4   812576.77  905.60
  -3   4   812174.46  795.19
  -3   4   811665.46  800.02
   3   4  -812027.74  956.09
  -3  -4   813465.28  910.86
  -3  -4   811093.26  809.17
  -3  -4   811751.70  862.78
   3  -4  -811468.57  856.73
   3  -4  -813069.85  875.50
   3   4  -7  223.07   50.71
  -3   4   7  288.54   75.29
   3   4  -7  348.58  139.12
  -3   4   7  200.37  105.91
  -3   4   7  213.34  103.77
  -3   4   7  133.31   79.01
   3   4  -7  248.27   90.65
   3  -4  -7  294.62   96.24
  -3  -4   7  174.85   97.10
  -3  -4   7  205.26  113.48
   3  -4  -7  241.66   84.09
  -3  -4   7  178.83   75.36
   3   4  -6 6143.95  459.20
  -3   4   6 5984.71  403.74
  -3   4   6 5675.75  342.38
  -3   4   6 5952.55  508.33
  -3   4   6 5852.07  362.06
   3   4  -6 5914.42  569.05
   3   4  -6 6435.87  448.42
  -3  -4   6 6654.53  462.51
   3  -4  -6 5841.33  464.08
   3  -4  -6 6082.02  397.02
  -3  -4   6 6372.90  477.50
  -3  -4   6 7227.26  592.32
   3   4  -5 1479.13  172.49
   3   4  -5 1070.56   85.23
  -3   4   5 1127.24  268.29
  -3   4   5 1182.20  441.79
   3   4  -5 1198.78  325.72
  -3  -4   5 1035.20  200.12
  -3  -4   5 1096.80   90.48
   3  -4  -5 1187.87  166.27
   3  -4  -5 1092.15   37.40
   3  -4  -5 1056.98  125.50
  -3  -4   5 2308.18  995.49
  -3   4   4 1959.35  140.53
  -3   4   4 2101.31  285.52
   3   4  -4 1808.28  160.13
  -3   4   4 2014.13  175.64
   3   4  -4 2093.01  214.57
   3   4  -4 2046.28  207.59
   3  -4  -4 2010.01  211.70
  -3  -4   4 1907.76  195.74
  -3  -4   4 2090.65  182.53
   3  -4  -4 1719.30  124.20
  -3  -4   4 2054.90  213.10
   3  -4  -4 2008.49  175.56
   3   4  -3   83.81   44.88
  -3   4   3   39.05   32.52
   3   4  -3   53.50   30.54
  -3   4   3   63.45   44.19
  -3   4   3   51.77   17.74
   3   4  -3   63.59   21.39
   3  -4  -3   40.53   44.79
   3  -4  -3   64.00   27.38
  -3  -4   3   85.43   35.09
   3  -4  -3   61.61   27.12
  -3  -4   3   52.49   39.23
  -3  -4   3   54.13   33.88
   3   4  -2 2291.50  204.55
  -3   4   2 2426.08  198.51
  -3   4   2 2656.48  196.77
   3   4  -2 2463.97  225.02
  -3   4   2 2998.10  355.49
   3   4  -2 2568.85  250.33
   3  -4  -2 2629.14  245.89
   3  -4  -2 2466.97  195.90
   3  -4  -2 2554.41  248.79
  -3  -4   2 2116.57  198.69
  -3  -4   2 2301.90  228.26
  -3  -4   2 2626.59  230.07
   3   4  -1  247.69   92.12
  -3   4   1  256.49  105.37
   3   4  -1  278.69   96.72
  -3   4   1  338.84  116.05
   3   4  -1  246.98  121.99
  -3   4   1  207.32   53.87
  -3  -4   1  197.34   83.90
   3  -4  -1  251.04  104.17
  -3  -4   1  311.43   84.95
   3  -4  -1  293.90   90.42
   3  -4  -1  270.94  131.18
  -3  -4   1  286.94  134.03
  -3   4   0 3471.41  225.85
   3   4   0 3776.12  269.07
   3   4   0 3060.55  230.92
  -3   4   0 3206.62  194.70
   3   4   0 4518.37  288.59
  -3   4   0 3963.43  339.15
  -3  -4   0 3521.23  235.39
   3  -4   0 3793.50  268.30
   3  -4   0 3990.89  264.26
  -3  -4   0 4139.09  271.19
   3  -4   0 3777.69  221.09
  -3  -4   0 3886.02  232.71
   3   4   1  308.97  107.52
  -3   4  -1  415.64  141.14
   3   4   1  308.45  144.14
  -3   4  -1  309.37  126.21
   3   4   1  279.76  105.18
  -3  -4  -1  317.64  120.56
   3  -4   1  334.40  192.18
   3  -4   1  299.58  114.09
  -3  -4  -1  313.83  109.32
   3  -4   1  299.76   97.08
   3  -4   1  331.75  139.66
  -3  -4  -1  355.33  110.29
   3   4   214801.57 1044.42
  -3   4  -215303.94 1122.59
   3   4   214006.68 1008.19
   3   4   212572.20  884.73
  -3   4  -215624.14 1092.55
  -3  -4  -214158.08 1003.47
  -3  -4  -215945.96 1125.67
   3  -4   214292.28 1035.98
  -3  -4  -216422.99 1164.81
   3  -4   214053.32  992.79
   3  -4   214887.10 1044.10
   3  -4   213768.88  967.36
   3   4   3   75.52   30.77
   3   4   3   17.11   18.62
  -3   4  -3   72.08   28.71
  -3   4  -3    7.25   26.35
   3   4   3   50.17   22.68
   3  -4   3   61.22   35.99
  -3  -4  -3   57.41   26.60
  -3  -4  -3   62.55   23.05
   3  -4   3   32.91   32.07
   3  -4   3   44.30   23.85
  -3  -4  -3   38.68   24.48
   3  -4   3   44.78   20.10
   3   4   4 5660.54  433.52
   3   4   4 5335.49  423.67
   3   4   4 5860.84  470.47
  -3   4  -4 5431.79  411.23
  -3   4  -4 5608.29  459.46
  -3  -4  -4 6239.73  473.39
   3  -4   4 5502.10  434.10
   3  -4   4 5965.51  514.15
  -3  -4  -4 6050.02  457.48
   3  -4   4 5783.28  448.54
   3  -4   4 5293.10  435.40
  -3  -4  -4 5644.48  451.09
   3   4   5   95.26   55.94
  -3   4  -5   94.32   33.65
   3   4   5   83.41   43.98
  -3   4  -5  109.23   49.03
   3   4   5  125.99   42.39
   3  -4   5   76.58   46.50
   3  -4   5   98.62   35.75
  -3  -4  -5   88.78   41.25
  -3  -4  -5  185.04   62.78
   3  -4   5  102.30   51.33
  -3  -4  -5  122.75   50.43
   3  -4   5    1.73   37.28
   3   4   6 4465.22  331.73
   3   4   6 4334.93  316.45
  -3   4  -6 3532.69  245.76
  -3   4  -6 5091.54  390.84
   3   4   6 5626.42  385.71
  -3  -4  -6 4958.02  326.30
   3  -4   6 4476.85  359.77
  -3  -4  -6 5258.32  370.55
   3  -4   6 4347.53  341.95
   3  -4   6 4688.53  353.81
  -3  -4  -6 4825.50  339.21
   3  -4   6 4935.97  352.02
  -3   4  -7  682.44  105.19
   3   4   7  797.30  266.98
   3   4   7 1022.32  112.43
  -3   4  -7  947.29  390.55
   3   4   7  902.36  166.81
   3   4   7  939.88  300.40
  -3  -4  -7 1124.84   96.01
  -3  -4  -7 1013.17  147.47
   3  -4   7  852.66  341.86
   3  -4   7  829.62  358.03
   3  -4   7 1030.03  120.54
   3  -4   7  929.69  382.90
   3   4   8 4101.49  303.02
   3   4   8 4050.80  314.80
   3   4   8 3685.74  302.79
   3   4   8 3495.39  294.40
  -3   4  -8 4006.90  341.92
   3   4   8 3846.22  314.09
  -3   4  -8 4645.92  361.69
   3  -4   8 4008.99  380.52
  -3  -4  -8 3645.56  313.53
   3  -4   8 3898.66  578.80
   3  -4   8 3575.98  316.40
   3   4   9  334.75  157.13
   3   4   9  325.97  142.23
  -3   4  -9  316.91  155.85
  -3   4  -9  528.57  200.45
   3   4   9  258.44  163.85
   3   4   9  294.55   98.10
   3  -4   9  367.21  195.43
  -3  -4  -9  351.75  162.29
   3  -4   9  322.18  116.21
  -3   4 -10  355.48  133.66
   3   4  10  409.51  188.18
  -3   4 -10  448.95  283.01
   3   4  10  370.12  233.01
   3   4  10  446.00  226.07
   3   4  10  383.87  110.44
   3   4  10  394.11  232.09
   3  -4  10  423.44  146.45
   3  -4  10  330.31  121.36
   3   4  11   15.88   23.12
   3   4  11   31.65   40.18
  -3   4 -11   36.22   22.83
   3   4  11   52.09   66.77
   3   4  11   27.08   41.99
   3   4  11   49.53   38.09
  -3   4 -11   52.10   39.28
   3  -4  11   21.95   36.48
   3  -4  11   -5.47   31.69
  -3   4 -12  802.94  267.38
   3   4  12  994.02  160.00
   3   4  12 1235.07  365.12
   3   4  12 1228.86  129.31
   3  -4  12 1097.81  622.68
   3  -4  12  879.09  233.96
   3   4  13  -12.62   53.44
  -3   4 -13   29.26   27.36
   3   4  13   20.32   24.83
   3  -4  13   19.73   35.48
   3  -4  13   -7.37   78.05
  -3   4 -14  473.27  158.19
   3   4  14  257.36  176.92
   3  -4  14  279.58  216.06
   3  -4  14  327.19  183.28
  -3   4 -15    9.33   29.47
   3   4  15  -11.16   69.42
   3  -4  15   22.23   38.61
  -3   5  15  167.05  349.56
   3   5 -14   81.23   34.86
  -3   5  14  114.24   71.95
  -3  -5  14  103.52   78.55
  -3  -5  14   75.54   55.39
  -3   5  13  411.04  298.31
  -3   5  13  434.87  395.62
   3   5 -13  504.61  180.58
  -3  -5  13  539.92  382.54
  -3  -5  13  558.14  291.14
  -3   5  12   51.12   62.56
   3  -5 -12   30.12   49.98
  -3  -5  12   66.18   63.09
  -3   5  11 1694.39  301.50
   3   5 -11 1368.41  380.78
  -3   5  11 1288.16  325.28
  -3   5  11 1389.19  236.18
   3   5 -11 1126.04  329.58
   3  -5 -11 1153.32  585.36
  -3  -5  11 1000.62  537.17
  -3   5  10  102.75   80.88
   3   5 -10   68.14   60.12
   3   5 -10  145.59   63.00
  -3   5  10  117.51   53.12
  -3   5  10   37.50   33.15
   3  -5 -10  158.30  109.80
  -3  -5  10   78.69   54.11
  -3  -5  10   88.88   65.22
  -3   5   9 5362.92  704.35
   3   5  -9 4614.16  541.27
  -3   5   9 5240.59  618.65
   3   5  -9 5393.55  670.84
  -3  -5   9 4603.41  591.48
   3  -5  -9 4819.09  615.83
  -3  -5   9 5883.71  731.45
   3  -5  -9 5631.13  658.59
   3   5  -8  415.81  187.61
  -3   5   8  409.43  157.28
   3   5  -8  458.67  165.58
  -3   5   8  424.41  202.87
   3  -5  -8  514.29  190.69
  -3  -5   8  303.56  178.97
  -3  -5   8  402.85  215.59
   3  -5  -8  485.76  139.29
  -3   5   7   39.85   47.63
  -3   5   7   47.72   76.40
   3   5  -7   78.01   33.42
   3   5  -7   52.80   42.43
  -3  -5   7   24.29   21.52
   3  -5  -7   51.53   31.45
  -3  -5   7   60.17   74.36
  -3  -5   7   43.94   36.14
   3  -5  -7   58.93   35.23
   3   5  -6 5068.93  410.73
  -3   5   6 5116.72  518.32
  -3   5   6 4510.00  409.76
   3   5  -6 5573.86  497.51
   3   5  -6 5012.49  716.05
  -3  -5   6 5276.84  434.31
   3  -5  -6 4390.37  421.04
   3  -5  -6 5205.71  414.63
  -3  -5   6 4353.71  406.12
  -3   5   511554.78  400.27
   3   5  -510931.52  284.71
  -3   5   510508.84  857.95
   3   5  -510606.19  878.80
   3   5  -510873.33  382.85
  -3  -5   510463.62  886.23
  -3  -5   512454.68  491.37
  -3  -5   511019.67  321.19
   3  -5  -5 9975.10  837.31
   3  -5  -511620.55  289.69
  -3   5   4 1202.71  179.46
  -3   5   4 1101.30  132.52
   3   5  -4 1045.28  479.38
   3   5  -4 1188.71  342.06
   3   5  -4 1192.63  332.44
   3  -5  -4 1137.39  182.47
  -3  -5   4 1180.71  177.16
  -3  -5   4  985.75  111.88
   3  -5  -4 1228.23  186.19
  -3  -5   4 1200.15  293.32
   3   5  -3 4205.06  337.16
  -3   5   3 3740.73  272.94
   3   5  -3 4644.95  714.36
   3   5  -3 3518.83  262.71
  -3   5   3 3939.23  324.89
  -3  -5   3 3506.49  283.59
  -3  -5   3 3879.68  310.58
   3  -5  -3 4159.20  262.75
   3  -5  -3 4113.36  365.00
   3  -5  -3 3772.23  320.48
  -3  -5   3 3679.00  400.13
  -3   5   2  802.67  225.89
   3   5  -2  897.71  114.59
  -3   5   2 1170.57  457.19
   3   5  -2  892.65  380.70
   3   5  -2  842.85  228.92
  -3  -5   2  839.73  330.27
   3  -5  -2  925.64   59.02
   3  -5  -2 1011.02  113.93
   3  -5  -2  750.56   77.91
  -3  -5   2  890.09   95.95
  -3  -5   2 1001.19  263.73
   3  -5  -2  802.58  116.98
  -3   5   111764.94  893.66
   3   5  -1 9597.59  713.01
   3   5  -110851.53  818.98
   3   5  -110241.50  758.73
  -3   5   1 9463.83  694.18
  -3  -5   110215.00  778.38
   3  -5  -111071.70  812.03
   3  -5  -111698.83  843.04
  -3  -5   110834.27  795.23
   3  -5  -1 9879.93  768.10
   3  -5  -1 9920.23  720.52
  -3  -5   110474.60  792.62
   3   5   0 3106.27  288.90
  -3   5   0 2628.48  232.75
  -3   5   0 3152.26  300.92
   3   5   0 2723.26  240.53
   3   5   0 3053.60  266.74
  -3  -5   0 2998.11  255.33
   3  -5   0 3181.89  259.54
  -3  -5   0 3221.18  289.28
   3  -5   0 2750.48  231.11
  -3  -5   0 2877.06  303.97
   3  -5   0 3036.06  376.37
   3  -5   0 3123.12  648.57
   3   5   1 2865.76  262.08
  -3   5  -1 2547.32  260.81
   3   5   1 2566.45  245.18
   3   5   1 1999.52  174.18
  -3   5  -1 2597.42  229.05
   3  -5   1 2708.59  262.16
   3  -5   1 2914.57  245.67
   3  -5   1 2747.37  231.30
  -3  -5  -1 2565.28  238.15
   3  -5   1 2653.28  247.74
  -3  -5  -1 2879.62  259.09
  -3  -5  -1 2838.80  245.31
  -3   5  -2  344.44  158.73
   3   5   2  246.79  101.97
  -3   5  -2  388.66  179.34
   3   5   2  244.46  124.17
   3   5   2  412.42  158.50
  -3  -5  -2  284.71   96.57
   3  -5   2  301.83   99.53
   3  -5   2  325.65  129.63
  -3  -5  -2  351.51  127.50
  -3  -5  -2  319.76  120.91
   3  -5   2  311.51   87.76
   3  -5   2  255.82  103.82
   3   5   3 8123.52  541.63
  -3   5  -3 9537.35  616.90
   3   5   3 7962.60  507.93
   3   5   3 9161.21  614.27
  -3   5  -3 9321.26  650.22
   3  -5   3 8413.02  599.41
   3  -5   3 8957.06  589.09
  -3  -5  -3 8893.63  594.25
   3  -5   3 8738.53  594.57
   3  -5   3 9099.53  602.37
  -3  -5  -3 8062.35  540.29
  -3  -5  -3 9137.67  596.21
  -3   5  -4 1299.99  159.08
   3   5   4 1079.49  100.12
   3   5   4 1283.04  279.70
  -3   5  -4 1224.78  198.19
   3   5   4 1128.24  125.94
   3  -5   4 1324.06  365.65
  -3  -5  -4 1230.12  126.53
   3  -5   4 1361.96  139.14
   3  -5   4 1095.98  478.48
  -3  -5  -4 1232.78  131.88
   3  -5   4 1161.51  199.06
  -3  -5  -4 1175.98  130.33
  -3   5  -5 3830.17  369.45
   3   5   5 3554.69  313.65
  -3   5  -5 3294.26  288.80
   3   5   5 3323.28  315.32
   3   5   5 3410.47  323.91
  -3  -5  -5 3812.68  334.76
   3  -5   5 4266.92  416.40
  -3  -5  -5 3569.74  354.44
   3  -5   5 3269.33  323.90
  -3  -5  -5 3711.42  315.07
   3  -5   5 3548.53  355.92
   3  -5   5 3602.84  337.25
   3   5   6   46.11   21.58
  -3   5  -6   15.17   33.84
   3   5   6   29.38   31.24
   3   5   6   22.50   36.04
  -3   5  -6    8.37   13.49
  -3  -5  -6   28.01   36.01
   3  -5   6   15.95   30.98
   3  -5   6   25.00   27.08
  -3  -5  -6   30.82   34.14
  -3  -5  -6   26.45   19.88
   3  -5   6   38.32   29.38
   3  -5   6    2.94   35.53
   3   5   7 1365.39  219.25
  -3   5  -7 1194.09  170.55
   3   5   7 1570.55  131.73
  -3   5  -7 1372.65  548.33
   3   5   7 1556.63  169.06
  -3  -5  -7 1762.91  437.89
   3  -5   7 1358.51  343.00
  -3  -5  -7 1399.28  127.61
   3  -5   7 1417.37  581.25
  -3  -5  -7 1370.63   77.17
   3  -5   7 1384.56  449.24
   3   5   8  900.27  178.43
   3   5   8  598.93  174.96
   3   5   8  892.69  216.16
  -3   5  -8  470.96  112.28
   3   5   8  507.22  199.73
  -3   5  -8  643.23  324.25
  -3  -5  -8  762.75  319.17
   3  -5   8  797.61  352.18
   3  -5   8  653.14  279.33
  -3   5  -9  304.68  146.04
   3   5   9  297.22  162.93
   3   5   9  220.87  176.39
   3   5   9  357.09  135.24
   3   5   9  298.33  228.71
  -3  -5  -9  372.45  157.71
   3  -5   9  324.14  118.88
   3  -5   9  380.62  177.07
   3   5  10   78.66   56.63
   3   5  10   74.37   76.93
  -3   5 -10  153.64   85.91
   3   5  10   38.71   28.41
   3   5  10   24.99   33.69
  -3  -5 -10   60.59   34.19
   3  -5  10   47.07   64.54
   3  -5  10   70.94   62.00
  -3   5 -11  852.38  177.19
   3   5  11  844.04  197.01
   3   5  11  899.23  238.38
   3   5  11  920.05  235.97
   3  -5  11  857.53  513.97
   3  -5  11 1061.03  342.46
  -3   5 -12  110.99   28.02
   3   5  12   91.36   84.95
   3   5  12  160.07   97.55
   3  -5  12  145.38   75.11
   3  -5  12   76.14   79.79
   3   5  13   37.97   88.51
  -3   5 -13   64.05   37.63
   3  -5  13   57.96   60.37
   3  -5  13   80.18   43.34
   3   5  14   30.50   38.64
  -3   5 -14   -8.35   35.25
   3  -5  14  -17.24   80.30
   3   5  15  436.01  549.30
   3  -5  15  367.38  626.39
   3   6 -14  310.12  196.39
  -3   6  14  177.11  312.98
  -3   6  13  100.62  167.92
   3   6 -13  573.21  302.44
  -3  -6  13  218.03  173.89
   3  -6 -13  208.23  283.63
  -3  -6  13  191.06  154.51
   3   6 -12 2135.78  311.62
  -3   6  12 2607.67  307.95
  -3  -6  12 1701.27  417.19
  -3  -6  12 2011.97  527.61
   3  -6 -12 1895.80 1068.71
  -3   6  11  356.16  230.40
   3   6 -11  520.09  225.82
   3   6 -11  402.53  158.91
   3  -6 -11  448.06  135.33
  -3  -6  11  465.76  307.25
   3   6 -10  646.75  203.51
   3   6 -10  833.26  448.06
  -3   6  10  785.93  245.72
   3  -6 -10  651.36  227.45
  -3  -6  10  688.54  538.30
   3  -6 -10  709.93  344.01
   3   6  -9  116.36   54.71
  -3   6   9   65.49   74.30
   3   6  -9  182.04   82.41
   3  -6  -9  168.32  105.34
   3  -6  -9   73.59   68.09
  -3  -6   9  107.04   93.36
   3   6  -8 1087.70  433.39
  -3   6   8 1234.23  211.15
   3   6  -8 1355.61  385.56
   3  -6  -8 1379.53  242.27
   3  -6  -8 1177.54  352.16
  -3  -6   8 1244.52  250.45
   3   6  -7  414.39  189.72
   3   6  -7  320.94  114.06
  -3   6   7  317.19  170.43
  -3  -6   7  320.02  124.73
   3  -6  -7  360.72  168.49
   3  -6  -7  482.15  151.64
  -3  -6   7  242.26  153.59
   3   6  -6  668.40  235.34
   3   6  -6  707.28  244.83
  -3   6   6  487.56  260.19
  -3   6   6  534.11  225.67
   3  -6  -6  701.64  243.95
  -3  -6   6  698.06  292.26
   3  -6  -6  533.25  200.20
  -3  -6   6  638.35  368.55
  -3  -6   6  419.29  197.55
  -3   6   5  930.15  561.30
   3   6  -5 1455.68  387.05
  -3   6   5 1318.95  257.08
   3   6  -5 1205.23  317.02
   3  -6  -5 1380.32  154.24
  -3  -6   5 1015.02  422.07
  -3  -6   5 1266.70  293.01
  -3  -6   5 1460.34  158.51
   3  -6  -5 1243.09  543.80
   3   6  -410022.49  745.14
  -3   6   410358.51  770.02
  -3   6   4 9375.67  736.63
   3   6  -4 9161.87  670.55
   3   6  -4 9752.30  708.04
  -3  -6   410251.13  718.92
  -3  -6   4 8725.39  645.59
  -3  -6   410000.62  752.70
   3  -6  -410352.40  723.66
   3  -6  -4 9411.37  715.57
  -3   6   3  471.79  224.91
   3   6  -3  511.64  222.29
  -3   6   3  494.24  232.34
   3   6  -3  677.13  203.32
   3   6  -3  421.22  175.99
  -3  -6   3  410.99  234.19
   3  -6  -3  562.00  235.04
   3  -6  -3  624.65  244.13
  -3  -6   3  515.16  235.87
  -3  -6   3  624.56  351.67
   3  -6  -3  613.53   40.90
   3   6  -2 8583.37  706.62
  -3   6   2 7877.73  642.09
   3   6  -2 8225.18  674.28
   3   6  -2 8795.64  772.49
  -3   6   2 8663.15  741.45
   3  -6  -2 8337.80  723.40
  -3  -6   2 8191.02  780.93
   3  -6  -2 8569.54  697.58
  -3  -6   2 8517.76  718.62
  -3  -6   2 8310.11  715.63
   3  -6  -2 8609.48  670.99
   3  -6  -2 8474.38  654.90
  -3   6   1  269.47  104.64
   3   6  -1  256.91  103.94
  -3   6   1  191.97   61.26
   3   6  -1  184.19  119.86
   3   6  -1  210.97  100.42
  -3  -6   1  234.38   79.60
   3  -6  -1  138.03   69.49
   3  -6  -1  291.27  131.26
  -3  -6   1  228.56  106.75
   3  -6  -1  192.24  104.48
   3  -6  -1  253.34   90.57
  -3  -6   1  286.10  100.32
   3   6   0 1340.57  196.10
  -3   6   0 1337.11  375.72
   3   6   0 1229.71  280.32
   3   6   0 1294.14  158.72
  -3   6   0 1174.55  335.53
   3  -6   0 1022.81  116.40
   3  -6   0 1294.27  138.21
  -3  -6   0 1141.01  418.10
  -3  -6   0 1147.31  284.96
   3  -6   0  967.05  396.53
  -3  -6   0 1152.33  359.21
   3  -6   0 1171.93  177.76
  -3   6  -1   30.05   60.70
   3   6   1   -5.36   43.34
   3   6   1   27.02   44.75
  -3   6  -1   26.02   21.60
   3   6   1    4.90   14.31
  -3  -6  -1   38.95   37.09
  -3  -6  -1   20.08   26.33
   3  -6   1    4.04   20.82
   3  -6   1   43.39   46.63
  -3  -6  -1   21.46   32.26
   3  -6   1   21.95   17.49
   3  -6   1   11.03   26.32
   3   6   2  289.56  185.74
   3   6   2  258.59  149.82
  -3   6  -2  378.21  143.44
   3   6   2  346.25  142.03
  -3   6  -2  357.15  215.58
   3  -6   2  343.00  116.86
   3  -6   2  371.83  172.40
  -3  -6  -2  335.75   99.39
   3  -6   2  210.37  107.52
  -3  -6  -2  392.05  161.22
   3  -6   2  337.23  110.56
  -3  -6  -2  412.39  127.27
   3   6   3  609.59  226.45
  -3   6  -3  619.93  282.79
  -3   6  -3  575.55  213.29
   3   6   3  355.52  142.57
   3   6   3  427.22  196.84
   3  -6   3  313.30  142.18
   3  -6   3  512.77  176.03
  -3  -6  -3  506.34  210.03
   3  -6   3  571.96  232.21
  -3  -6  -3  501.10  211.12
  -3  -6  -3  530.02  218.61
   3  -6   3  421.86  154.54
   3   6   4 2195.00  217.29
   3   6   4 1765.55  141.51
   3   6   4 1882.28  278.60
  -3   6  -4 2258.87  387.88
  -3   6  -4 2296.42  248.13
   3  -6   4 2414.04  415.03
   3  -6   4 1787.15  219.75
   3  -6   4 2187.57  226.68
  -3  -6  -4 2137.98  168.54
  -3  -6  -4 2069.91  280.43
   3  -6   4 1916.33  264.01
  -3  -6  -4 2365.60  214.98
  -3   6  -5   41.66   21.56
   3   6   5   46.88   50.64
   3   6   5   10.46   14.34
   3   6   5   -9.08   38.88
  -3   6  -5   26.19   51.13
   3  -6   5    8.32   46.92
   3  -6   5   -2.65   41.30
   3  -6   5   23.33   49.84
  -3  -6  -5   19.44   15.11
  -3  -6  -5   36.31   27.93
   3   6   6 1257.06  221.37
   3   6   6 3014.61  325.87
   3   6   6 1291.59  290.63
  -3   6  -6 1102.42  167.09
  -3  -6  -6 1330.86  264.84
   3  -6   6 1443.31  502.53
   3  -6   6 1298.44  335.28
  -3  -6  -6 1492.14  171.09
   3  -6   6 1004.94  224.38
   3   6   7  406.74   73.04
  -3   6  -7  401.10  104.98
   3   6   7  281.62  227.82
   3   6   7  438.62   90.01
   3   6   7  432.05  164.29
   3  -6   7  681.20  314.78
   3  -6   7  553.42  218.70
  -3  -6  -7  484.19  229.90
   3   6   8 2334.59  282.30
  -3   6  -8 1913.91  430.86
   3   6   8 2914.20  380.35
   3   6   8 2684.25  325.71
   3   6   8 2327.02  316.97
   3  -6   8 2268.92  542.10
  -3  -6  -8 2597.05  412.41
   3  -6   8 2310.29  397.31
   3   6   9  168.04  179.57
   3   6   9  151.18  123.04
   3   6   9  134.04   93.72
  -3   6  -9  135.56   63.43
   3  -6   9  144.58   88.14
   3  -6   9  318.42  121.18
  -3  -6  -9  184.23  122.57
   3   6  10 1680.88  178.67
  -3   6 -10 1905.54  591.32
   3  -6  10 1829.02  222.07
  -3  -6 -10 1459.06  163.44
   3  -6  10 1700.13  406.26
   3   6  11   72.17   50.37
  -3   6 -11  446.93  192.43
  -3  -6 -11   73.26   57.33
   3  -6  11  104.76   58.98
   3  -6  11   90.76   70.23
  -3   6 -12  595.98  245.08
   3   6  12  462.02  477.56
   3  -6  12  550.92  352.63
   3  -6  12  815.86  563.96
  -3   6 -13   31.74   42.05
   3   6  13   32.63   61.36
   3  -6  13   26.06   39.21
   3  -6  14  185.14  249.29
   3  -7 -14  -29.44  136.97
   3   7 -13  832.14  444.04
   3  -7 -13  719.49  569.06
  -3   7  12   42.63   40.26
   3   7 -12   12.35   17.57
  -3  -7  12   21.42   52.05
   3  -7 -12    8.76   67.89
   3   7 -11  915.28  396.29
  -3   7  11 1501.68  274.34
  -3  -7  11  762.49  653.79
   3  -7 -11  826.40  589.17
  -3  -7  11  942.00  567.50
  -3   7  10  475.78  339.31
   3   7 -10  366.26  307.23
   3   7 -10  489.40  243.64
   3  -7 -10  646.33  456.35
  -3  -7  10  471.14  441.46
   3   7  -9  230.80   74.89
  -3   7   9  132.86  138.14
   3   7  -9  226.03   77.17
  -3  -7   9  148.31  182.95
   3  -7  -9  139.41   64.93
   3   7  -8    2.27   38.86
  -3   7   8   15.19   27.16
   3   7  -8   51.03   59.08
   3  -7  -8   -6.83   70.24
  -3  -7   8   33.03   52.39
   3   7  -7 2163.28  452.39
  -3   7   7 2236.33  258.90
   3   7  -7 2559.08  290.20
  -3  -7   7 2246.03  392.78
   3  -7  -7 2151.79  960.13
   3   7  -6   94.52   68.36
   3   7  -6   42.25   47.46
  -3   7   6   18.13   32.14
  -3  -7   6   -0.93   64.90
   3  -7  -6   27.19   28.51
   3   7  -5   96.65   62.71
  -3   7   5   90.28   61.67
   3   7  -5  134.43   71.43
   3  -7  -5   91.09   62.19
  -3  -7   5   62.03   75.61
   3  -7  -5  217.36   84.61
  -3  -7   5  184.36  104.77
   3   7  -4  912.82  345.49
  -3   7   4  919.34  342.00
   3   7  -4  905.97  349.45
  -3  -7   4  843.62  235.05
   3  -7  -4  928.79  336.78
   3  -7  -4  954.63  440.15
  -3  -7   4  728.16  391.86
  -3   7   3 4993.19  513.87
   3   7  -3 5460.46  565.04
   3   7  -3 4733.80  491.05
  -3  -7   3 5656.90  617.44
   3  -7  -3 5175.81  535.72
   3  -7  -3 4915.18  555.21
  -3  -7   3 5038.81  537.38
  -3   7   2 1762.63  221.73
   3   7  -2 1879.31  169.97
   3   7  -2 1837.63  282.33
   3  -7  -2 2011.29  105.88
  -3  -7   2 2023.28  196.75
   3  -7  -2 2128.63  220.78
   3  -7  -2 1815.82  154.36
   3  -7  -2 1802.79   90.45
  -3  -7   2 1774.76  720.47
  -3   7   1 3778.00  273.22
   3   7  -1 4236.67  211.77
   3   7  -1 3811.96  318.05
   3   7  -1 4570.32  288.56
  -3  -7   1 4183.24  401.74
   3  -7  -1 4117.42  287.64
   3  -7  -1 4245.38  162.22
  -3  -7   1 4870.12  272.70
   3  -7  -1 4044.00  152.61
   3  -7  -1 4377.15  219.23
   3   7   0  380.42  210.85
   3   7   0  444.66  249.11
   3   7   0  562.80  274.36
  -3   7   0  472.78  203.35
  -3  -7   0  627.50  309.75
  -3  -7   0  685.73  295.55
   3  -7   0  457.52  208.68
   3  -7   0  493.31  219.04
   3  -7   0  468.42  194.06
   3   7   1 7198.65  344.25
  -3   7  -1 6399.58  256.64
   3   7   1 6799.61  234.97
   3   7   1 6301.71  442.47
  -3  -7  -1 6133.99  477.55
   3  -7   1 6000.35  330.67
  -3  -7  -1 7285.15  328.17
   3  -7   1 7085.56  258.21
   3  -7   1 6299.55  235.11
  -3   7  -2  537.26  203.48
   3   7   2  391.44  203.25
   3   7   2  477.54  234.70
   3   7   2  393.94  231.90
   3  -7   2  389.68  161.94
  -3  -7  -2  429.94  230.21
   3  -7   2  461.70  152.03
  -3  -7  -2  537.40  266.45
   3  -7   2  357.52  203.15
   3   7   3 1091.06  356.86
  -3   7  -3 1337.08  258.94
   3   7   3 1535.61  170.92
   3   7   3 1677.24  220.65
   3  -7   3 1355.83  649.75
  -3  -7  -3 1571.72  180.20
  -3  -7  -3 1197.56  195.18
   3  -7   3 1370.63  175.47
   3  -7   3 1346.32  537.02
   3   7   4   28.89   38.08
  -3   7  -4   41.28   37.33
   3   7   4   22.29   13.73
   3   7   4   17.15   26.75
  -3  -7  -4   25.44   64.29
   3  -7   4   27.98   43.21
   3  -7   4   13.90   35.13
   3  -7   4   33.15   64.95
  -3  -7  -4   -2.78   14.24
   3   7   5  402.16  304.23
   3   7   5  481.32  236.03
   3   7   5  533.84   42.36
  -3   7  -5  480.28  258.55
   3  -7   5  352.88  275.62
  -3  -7  -5  398.84  189.38
   3  -7   5  444.32  244.07
   3  -7   5  430.49  231.15
   3   7   6  336.81  178.66
   3   7   6  321.68  247.60
  -3   7  -6  464.39  215.07
  -3  -7  -6  474.42  158.52
   3  -7   6  496.42  199.32
   3  -7   6  450.98  199.25
   3   7   7 1963.19  297.48
   3   7   7 1490.64  331.87
  -3   7  -7 1612.14  285.84
   3  -7   7 3255.17  459.01
  -3  -7  -7 1782.43  224.36
   3  -7   7 1453.46  232.07
   3   7   8   58.72   34.68
   3   7   8   79.32   57.35
  -3   7  -8   85.77   58.92
  -3  -7  -8   74.82   51.51
   3  -7   8   61.94   63.97
   3  -7   8   58.39   78.81
   3   7   9  404.33  289.81
  -3   7  -9  405.39  171.34
   3  -7   9  408.05  230.49
  -3  -7  -9  523.61  378.20
   3  -7   9  530.67  271.60
   3   7  10    6.40   47.35
  -3   7 -10   49.97   49.11
   3  -7  10   47.99   53.94
   3  -7  10   38.22   58.92
  -3  -7 -10   27.92   30.73
  -3   7 -11 1253.93  644.82
   3   7  11  628.77  571.04
   3  -7  11  503.91  431.15
   3  -7  11  754.54  591.71
   3   7  12   13.59   42.18
  -3   7 -12   48.56   50.86
   3  -7  12    0.96   38.81
   3  -7  13  251.72  391.62
   3   8 -13   48.79   41.04
   3  -8 -13   25.82   49.30
   3   8 -12   20.33   24.58
  -3   8  12   46.24   58.98
   3  -8 -12   -2.30   61.92
   3   8 -11   85.37   45.12
  -3   8  11   81.48   84.50
   3  -8 -11   62.06  115.75
   3   8 -10 1021.97  277.73
  -3   8  10  734.64  491.42
  -3  -8  10  593.06  602.18
   3  -8 -10  969.57  480.84
  -3  -8  10  839.51  401.93
  -3   8   9  359.27  287.75
   3   8  -9  491.20  248.83
  -3  -8   9  288.55  279.01
   3  -8  -9  498.69  249.80
  -3  -8   9  352.27  211.95
  -3   8   8  909.86  269.39
   3   8  -8  510.96  376.25
   3   8  -8  908.65  466.13
  -3  -8   8  812.33  534.88
   3  -8  -8  830.10  510.02
  -3   8   7  159.15  148.09
   3   8  -7  195.01  111.63
   3   8  -7  275.02  131.84
  -3  -8   7  165.90  140.82
   3  -8  -7  252.24  189.11
  -3   8   6 3134.96  504.01
   3   8  -6 2698.33  716.32
   3   8  -6 3308.58  704.33
  -3  -8   6 3477.65  380.06
   3  -8  -6 3024.34  330.19
   3   8  -5   43.35   45.73
   3   8  -5   30.10   24.56
  -3   8   5   31.89   50.12
   3  -8  -5   -1.67   52.21
  -3  -8   5   22.18   52.11
  -3   8   4   14.83   19.65
   3   8  -4   35.42   25.31
   3   8  -4   26.30   33.93
  -3  -8   4   71.10   81.26
   3  -8  -4   19.04   50.95
   3   8  -3   16.18   48.50
   3   8  -3   37.79   43.21
  -3   8   3   -4.83   46.06
  -3  -8   3   28.75   44.34
  -3  -8   3   27.21   36.88
   3  -8  -3   26.60   58.36
   3   8  -2  178.83  116.65
   3   8  -2  156.30   64.61
  -3   8   2  163.31   65.68
  -3  -8   2  149.28   62.61
   3  -8  -2  127.81   53.10
  -3  -8   2  119.12   69.47
   3  -8  -2    2.96   10.10
   3  -8  -2   90.01   51.30
   3   8  -1  326.03  107.46
   3   8  -1  298.76  209.51
  -3   8   1  341.22   86.81
   3  -8  -1  434.89  212.71
  -3  -8   1  379.75  135.05
   3  -8  -1  322.89  148.11
   3  -8  -1    3.34   12.55
  -3  -8   1  443.72  190.10
  -3   8   0 2506.18  337.32
   3   8   0 2655.19  342.39
   3   8   0 2677.05  518.68
  -3  -8   0 2422.45  358.32
  -3  -8   0 3244.04  434.01
   3  -8   0 2664.46  382.90
   3  -8   0 2327.60  356.17
   3   8   1  337.18  117.89
  -3   8  -1  355.69  113.82
   3   8   1  174.06  133.78
   3  -8   1  246.39  135.12
   3  -8   1  342.87  160.59
  -3  -8  -1  376.16  247.72
   3  -8   1  335.99  199.97
  -3  -8  -1   96.21   40.90
  -3   8  -2 1069.30  212.58
   3   8   2  901.46  276.36
   3   8   2  937.37  148.93
   3  -8   2  675.14  390.09
  -3  -8  -2  963.86  496.75
   3  -8   2  965.24  579.86
   3  -8   2  913.40  151.02
  -3  -8  -2  -10.08   40.45
   3   8   3  570.88  191.46
  -3   8  -3  611.31  336.06
   3   8   3  717.96  267.95
   3  -8   3  606.07  295.31
   3  -8   3  628.06  231.83
   3  -8   3  536.94  287.05
  -3  -8  -3  544.01  472.28
  -3  -8  -3    1.75   16.21
   3   8   4  463.57  277.94
   3   8   4  365.38  100.40
  -3   8  -4  345.42  191.10
   3  -8   4  400.50  264.18
  -3  -8  -4  389.11  240.81
   3  -8   4  261.49  168.14
   3  -8   4  350.65  222.22
   3   8   5   12.28   37.26
  -3   8  -5   21.83   43.19
   3  -8   5    6.08   38.12
   3  -8   5   11.09   35.43
  -3  -8  -5   18.37   34.99
   3   8   6 1423.52  210.13
  -3   8  -6 1497.61  264.55
   3  -8   6 1183.82  685.94
   3  -8   6 1418.18  506.53
  -3  -8  -6 1212.21  600.74
   3   8   7   -4.00   59.22
  -3   8  -7    8.75   36.17
   3  -8   7   -2.93   61.97
   3  -8   7  -10.44   77.07
  -3  -8  -7   27.46   25.97
  -3   8  -8  314.37  176.95
   3   8   8  251.75  180.76
  -3  -8  -8  417.61  243.03
   3  -8   8  237.67  248.15
   3  -8   8  346.78  195.57
  -3   8  -9   22.58   40.91
   3   8   9   14.58   43.65
   3  -8   9  -27.19   57.26
   3  -8   9  -26.76  110.35
  -3  -8  -9   -3.85   38.56
  -3   8 -10  493.07  278.21
   3   8  10  443.31  428.95
   3  -8  10  550.94  693.46
   3  -8  10  815.20  444.31
   3   8  11   13.62   39.88
   3  -8  11   -0.82   87.48
  -3   9  11   14.69   54.68
   3  -9 -11   24.66  106.63
  -3   9  10   51.91   42.59
   3   9 -10   28.63   49.42
   3  -9 -10   19.43   90.96
  -3   9   9  129.18   80.18
   3   9  -9   82.02   62.16
  -3  -9   9   77.33   61.75
   3  -9  -9  163.57   95.22
  -3   9   8   69.80   55.56
   3   9  -8   67.19   57.75
  -3  -9   8   18.92   20.81
  -3  -9   8    1.64   88.95
   3  -9  -8  111.24   72.75
  -3   9   7  625.40  510.61
   3   9  -7  969.45  523.32
  -3  -9   7 1019.26  701.60
  -3  -9   7 1044.79  321.63
   3  -9  -7  934.35  614.59
   3   9  -6   22.26   61.34
  -3   9   6   13.90   37.93
  -3  -9   6  130.42   64.15
   3  -9  -6   60.63   69.25
   3   9  -5  443.01  383.17
   3   9  -5  663.88  347.66
  -3   9   5  570.26  416.49
  -3  -9   5  619.87  494.67
   3  -9  -5  508.89  486.13
   3   9  -4   56.67   38.96
   3   9  -4   20.18   26.07
  -3   9   4   49.72   38.96
  -3  -9   4   50.67  111.65
   3  -9  -4  101.46   95.48
   3   9  -3  126.46   67.39
  -3   9   3  133.33   96.43
   3   9  -3  174.55   85.23
  -3  -9   3  120.69   93.07
   3  -9  -3  182.79   98.93
   3   9  -2  117.76   70.69
   3   9  -2  150.83  111.28
  -3   9   2  116.98   85.65
  -3  -9   2  217.93  121.28
  -3  -9   2   11.54   48.54
   3  -9  -2  110.79   81.53
   3   9  -1  160.48   69.56
   3   9  -1  109.74   81.74
  -3   9   1  127.76   77.68
   3  -9  -1  127.40   84.42
  -3  -9   1    7.65   43.44
  -3  -9   1  211.17  100.02
   3  -9  -1  227.25  121.00
  -3   9   0   61.16   31.90
   3   9   0   55.04   51.28
   3  -9   0   37.41   35.81
  -3  -9   0   70.23   94.90
   3  -9   0   92.11   92.57
   3   9   1  607.06  159.81
   3   9   1  633.41  346.52
  -3   9  -1  743.06  410.68
   3  -9   1  644.91  297.99
  -3  -9  -1  442.57  291.44
   3  -9   1  526.33  351.79
  -3   9  -2   17.64   34.43
   3   9   2    6.03   73.13
  -3  -9  -2    5.25   12.60
  -3  -9  -2    8.70   82.93
   3  -9   2   10.47   42.11
   3  -9   2   15.44   58.34
   3  -9   2   31.01   43.99
  -3   9  -3  707.24  447.68
   3   9   3  678.96  357.42
  -3  -9  -3  609.56  420.36
   3  -9   3  875.57  336.60
   3  -9   3  520.30  337.36
   3  -9   3    2.94   41.83
   3   9   4  -32.36   71.57
  -3   9  -4  -13.78   59.49
   3  -9   4   74.70   77.61
   3  -9   4   19.75   30.84
  -3  -9  -4   46.02   43.11
  -3   9  -5 1698.83  275.60
   3   9   5 1701.42  255.65
   3  -9   5  995.38  618.95
  -3  -9  -5  989.61  509.67
   3  -9   5 1410.35  561.38
   3   9   6   35.63   65.03
  -3   9  -6   11.27   33.59
  -3  -9  -6   23.02   46.38
   3  -9   6   26.77   45.05
   3  -9   6    1.22   62.70
  -3   9  -7  284.04  130.54
   3   9   7  149.39   96.53
   3  -9   7  132.19   70.29
  -3  -9  -7  191.36  122.47
   3  -9   7  165.78  109.36
   3   9   8   20.37   44.83
   3  -9   8   -5.89   42.47
   3  -9   8    2.21   57.72
  -3  -9  -8   16.58   31.75
   3  -9   9  343.72  181.71
  -3  10   8   88.52   87.86
  -3 -10   8  163.90  121.70
  -3  10   7   29.09   67.97
   3 -10  -7   63.67   75.25
  -3 -10   7   19.14   40.12
  -3  10   6  143.40   80.94
   3  10  -6   79.18   66.49
   3 -10  -6  211.63  128.33
  -3 -10   6  137.38   96.78
  -3  10   5   43.92   63.51
   3  10  -5   36.15   52.68
  -3 -10   5   12.84   94.98
   3 -10  -5   69.27   96.59
  -3 -10   5    9.22   31.60
   3  10  -4  460.66  325.83
  -3  10   4  268.29  227.77
   3 -10  -4  304.53  333.67
  -3 -10   4  326.11  269.16
  -3 -10   4  425.85  343.17
   3  10  -3   33.44   46.13
  -3  10   3   63.14   46.69
  -3 -10   3   24.27   31.81
   3 -10  -3   28.06   73.18
  -3 -10   3   70.39  116.75
   3  10  -2  146.80  102.23
  -3  10   2  108.55   92.06
  -3 -10   2  151.37  152.30
   3 -10  -2  191.36  150.35
  -3 -10   2  122.62   91.36
   3  10  -1   11.14   36.06
  -3  10   1    8.47   47.59
  -3 -10   1   20.96   22.30
   3 -10  -1   26.78   68.06
  -3 -10   1   23.98   65.66
  -3  10   0  154.09   84.97
   3  10   0  117.47   65.07
  -3 -10   0  102.82   84.68
   3 -10   0  152.26   99.01
   3  10   1   77.88   90.75
  -3  10  -1   86.62   76.83
  -3 -10  -1   92.92   74.24
   3  10   2  581.08  464.04
  -3  10  -2  644.15  384.90
  -3 -10  -2  592.59  555.49
   3 -10   2  576.34  479.14
   3  10   3  163.44   92.50
  -3  10  -3  175.00  100.36
  -3 -10  -3  146.42  113.53
   3 -10   3  139.50   94.75
   3 -10   3  116.75   84.58
  -3  10  -4  418.35  274.03
   3  10   4  432.67  341.92
  -3 -10  -4  712.01  466.53
   3 -10   4  298.11  416.65
   3 -10   4  461.46  387.99
   3 -10   5   56.05   45.19
  -3 -10  -5   -5.97   73.00
  -3 -10  -6  174.09   94.79
   3 -10   6  236.82  114.90
  -3 -10  -7   21.48   72.22
   3 -10   7   44.28   37.96
   3 -10   8  116.01  105.51
  -3 -11   0   -7.43  121.82
  -3 -11  -1  347.20  458.67
  -3 -11  -2  -12.27  113.01
  -3 -11  -4   42.64   58.93
  -3 -11  -5   97.47  161.44
  -4   0  17   26.66   43.92
  -4   0  17  -26.70   70.44
  -4   0  16    4.10   58.04
  -4   0  16   33.07   43.87
  -4   0  15   13.76   34.83
  -4   0  15  -15.12   94.25
  -4   0  14 1122.55  297.65
  -4   0  14 1388.16  235.44
  -4   0  14 1087.11  740.33
  -4   0  13   34.83   60.53
   4   0 -13    3.49   51.67
  -4   0  13   16.24   20.06
  -4   0  13    4.06   23.54
   4   0 -12 1014.81  467.64
  -4   0  12  881.22  169.33
  -4   0  12 1019.83  228.29
  -4   0  12 1121.92  497.02
  -4   0  11    1.21    9.47
  -4   0  11   41.55   45.32
  -4   0  11   28.56   49.38
  -4   0  11   13.89   32.62
   4   0 -11   25.84   40.42
  -4   0  11    5.21   11.35
  -4   0  10 1925.84  577.01
  -4   0  10 1533.77  251.57
   4   0 -10 1597.16  178.77
  -4   0  10 2102.63  169.82
  -4   0  10 1694.69  131.59
  -4   0  10 1771.14  389.72
  -4   0   9    4.20    8.18
  -4   0   9    5.48   13.98
   4   0  -9   37.12   29.12
  -4   0   9   19.77   61.97
  -4   0   9   19.60   29.32
  -4   0   9   23.22   39.37
  -4   0   8    9.44   29.71
  -4   0   8   51.42   16.84
  -4   0   8   17.89   50.27
  -4   0   8   27.82   24.35
   4   0  -8   12.39   23.09
  -4   0   8   51.60   16.98
   4   0  -7   10.28   38.93
  -4   0   7  -13.00   40.13
  -4   0   7   11.99   28.45
  -4   0   7    5.13    6.32
  -4   0   7   -0.08    6.33
  -4   0   7   -9.55   35.38
  -4   0   6 4531.07  313.55
  -4   0   6 4441.69  357.86
   4   0  -6 4364.14  403.61
  -4   0   6 4651.47  388.45
  -4   0   6 4548.98  373.57
  -4   0   6 4460.91  307.53
   4   0  -5   -8.75   28.77
  -4   0   5   25.81   48.47
  -4   0   5   14.31   19.69
  -4   0   5   -3.47   18.17
  -4   0   432812.82 1615.97
  -4   0   434489.81 1684.82
  -4   0   433577.46 1653.14
  -4   0   3    7.87   17.94
   4   0  -3   -3.67   22.55
  -4   0   3   19.13   17.42
   4   0  -2   26.06    7.90
   4   0  -2   22.92   12.79
  -4   0   2   36.19   30.88
  -4   0   2   30.72   33.03
   4   0  -2   30.82   46.39
   4   0  -2    8.12   29.15
   4   0  -1   17.02   24.30
  -4   0   1   -0.70   36.40
  -4   0   1   10.64   16.52
   4   0  -1    8.04    5.65
  -4   0   1    6.86    8.84
   4   0  -1    6.34   21.62
   4   0   0 8839.39  508.36
   4   0   0 7381.21  356.67
   4   0   0 9303.11  478.65
  -4   0   011655.88  565.66
  -4   0   0 9765.87  499.43
  -4   0   0 9521.15  509.34
  -4   0  -1   -0.10   16.45
  -4   0  -1   -2.04   18.10
   4   0   1    7.03   11.83
  -4   0  -1   20.46   23.83
   4   0   1    7.19    8.06
   4   0   1   23.04   23.46
   4   0   2  684.96   94.08
  -4   0  -2  685.68   66.94
   4   0   2  553.75   70.62
   4   0   2  562.12   36.60
  -4   0  -2  794.87   55.96
  -4   0  -2  708.70   47.98
  -4   0  -3    3.04    7.42
   4   0   3    6.72   15.08
   4   0   3    1.87   11.03
  -4   0  -3    5.20   17.69
   4   0   3   -0.46    7.79
  -4   0  -3   13.01   23.16
   4   0   4  135.22   42.03
   4   0   4  114.70   36.65
  -4   0  -4  132.95   43.62
  -4   0  -4  172.09   93.01
   4   0   4  168.51   81.29
  -4   0  -4  146.12   51.28
  -4   0  -5    5.61    6.95
  -4   0  -5   17.02   19.22
  -4   0  -5    2.58   31.17
   4   0   5    2.66    6.03
   4   0   5   12.16   22.80
   4   0   5    2.55    9.77
  -4   0  -6 4558.14  326.83
   4   0   6 4529.15  339.90
  -4   0  -6 4900.77  382.83
  -4   0  -6 5991.77  455.97
   4   0   6 4474.18  361.46
   4   0   6 4956.95  354.47
   4   0   7   10.04   10.84
   4   0   7   -6.12   17.00
  -4   0  -7    5.36   23.08
   4   0   7   12.44   24.14
   4   0   7  -12.69   37.79
  -4   0  -7   20.16   21.01
  -4   0  -8 2247.73  189.16
   4   0   8 2425.34  180.74
   4   0   8 2470.59  296.18
   4   0   8 2191.18  288.15
  -4   0  -8 2726.70  288.75
   4   0   9    9.07   18.51
   4   0   9    9.55   27.04
  -4   0  -9   -7.52   32.32
   4   0   9   -2.24   24.00
   4   0   9   21.62   22.60
   4   0   9  -17.30   55.58
  -4   0 -10 6169.19  220.47
   4   0  10 6728.78  230.77
   4   0  10 6329.14  314.12
   4   0  10 6614.60  293.07
   4   0  10 6695.78  516.53
   4   0  10 7809.82  282.92
   4   0  11   11.63   38.21
   4   0  11   14.83   28.30
   4   0  11   12.34   17.16
  -4   0 -11   19.04   26.90
   4   0  12   47.89   51.09
   4   0  12   39.85   51.43
   4   0  12   40.99   51.75
  -4   0 -12   39.87   30.05
   4   0  13   -1.94   33.52
   4   0  13   39.80   48.28
  -4   0 -13   15.75   21.01
   4   0  14  136.67   74.02
   4   0  14  133.70  107.15
   4   0  15   -5.41   77.58
   4   0  15    5.82   35.14
   4   0  16  639.62  506.42
   4   0  16  739.17  768.47
  -4  -1  17   93.17  143.91
  -4   1  16   70.58   63.26
  -4   1  16   29.73   55.71
  -4  -1  16   -6.44   64.28
  -4  -1  16   21.23   54.73
  -4   1  15   58.71   65.71
  -4   1  15   61.24   75.70
  -4  -1  15   57.04   76.73
  -4  -1  15  114.59  130.44
  -4   1  14   -0.78   27.69
  -4   1  14   34.71   27.29
  -4   1  14   70.73   54.37
  -4  -1  14   12.26   17.89
  -4  -1  14   19.65   37.68
  -4  -1  14    3.53   60.73
   4   1 -13 1142.74  487.42
  -4   1  13 1398.10  247.19
  -4   1  13 1231.99  325.70
  -4   1  13 1246.89  335.11
  -4  -1  13 1087.42  511.72
  -4  -1  13 1545.75  271.68
   4   1 -12 1400.89  534.86
  -4   1  12 1089.63  196.51
  -4   1  12 1186.27  602.38
  -4   1  12 1447.00  195.13
   4   1 -12 1160.71  238.42
  -4   1  12 1209.65  227.79
  -4  -1  12 1267.91  343.45
  -4  -1  12 1420.77  236.55
   4  -1 -12 1153.10  453.69
  -4   1  11 2952.34  367.39
   4   1 -11 2885.56  338.24
  -4   1  11 2651.85  262.20
   4   1 -11 2773.29  272.56
  -4   1  11 2956.53  677.28
  -4   1  11 2728.43  318.41
  -4   1  11 3009.67  309.56
   4  -1 -11 2774.12  313.76
  -4  -1  11 3036.12  308.04
  -4  -1  11 2724.20  359.64
  -4   1  10 1206.21  210.59
  -4   1  10 1284.04  655.83
   4   1 -10 1706.11  134.68
  -4   1  10 1388.05  173.46
   4   1 -10 1589.54  255.09
  -4   1  10 1303.00  104.22
  -4   1  10 1629.98  153.87
  -4  -1  10 1328.04  512.62
  -4  -1  10 1561.93  139.75
  -4  -1  10 1477.56  277.01
  -4  -1  10 1668.07  507.21
   4  -1 -10 1609.57  231.42
  -4   1   9  120.29   58.94
   4   1  -9  146.06   40.15
  -4   1   9  160.29   60.13
  -4   1   9  113.13   29.78
   4   1  -9  142.45   70.45
  -4   1   9  125.28   59.46
  -4   1   9   64.67   59.51
  -4  -1   9  132.51   56.54
  -4  -1   9  147.87  119.62
  -4  -1   9  105.66   49.66
   4  -1  -9  174.20   58.69
  -4  -1   9  105.70   46.92
  -4   1   8  319.87  109.31
  -4   1   8  312.11  103.82
  -4   1   8  361.97  187.24
   4   1  -8  379.36  202.68
  -4   1   8  252.58   81.04
  -4   1   8  235.85   54.84
   4   1  -8  244.54   48.58
  -4  -1   8  265.27  132.44
   4  -1  -8  278.93  102.23
  -4  -1   8  336.99  138.00
  -4  -1   8  312.35  151.22
  -4  -1   8  260.76   92.35
  -4   1   7 1531.01  498.51
   4   1  -7 1365.68  244.25
  -4   1   7 1090.20  121.44
  -4   1   7 1359.72  333.77
  -4   1   7 1127.17   60.08
  -4  -1   7 1270.21  123.28
  -4  -1   7 1315.38  434.76
   4  -1  -7 1235.89  147.01
  -4  -1   7 1096.36  115.54
  -4  -1   7 1248.41   70.16
  -4   1   6 1435.11  107.02
  -4   1   6 1567.67  433.81
  -4   1   6 1523.72  158.87
   4   1  -6 1932.49  144.97
  -4   1   6 1377.92   36.77
   4   1  -6 1410.63  216.42
  -4  -1   6 1335.00  265.71
   4  -1  -6 1623.71  199.40
  -4  -1   6 1749.64  621.84
   4  -1  -6 1400.60  102.21
  -4  -1   6 1486.16  117.36
  -4  -1   6 1288.30  121.51
   4   1  -5  294.23   90.23
  -4   1   5  345.28   38.41
  -4   1   5  324.23  146.20
  -4   1   5  250.05   16.56
   4   1  -5  207.13   18.02
  -4   1   5  376.01  149.43
  -4  -1   5  315.47  185.14
  -4  -1   5  331.70  177.80
  -4  -1   5  300.54   35.03
  -4  -1   5  521.94  253.51
   4  -1  -5  383.28  182.00
   4  -1  -5  280.64  107.08
   4   1  -4   42.11   15.32
  -4   1   4   39.03   12.94
  -4   1   4   37.16   36.14
   4   1  -4   40.72   19.90
  -4   1   4   38.20   36.64
   4   1  -4   20.16   30.57
  -4  -1   4   73.33   35.34
   4  -1  -4   32.59   43.07
  -4  -1   4   34.82   14.13
  -4  -1   4   66.79   49.64
   4  -1  -4   35.85   28.93
  -4   1   3 6714.46  413.41
   4   1  -3 5106.20  359.93
   4   1  -3 6363.10  385.25
  -4   1   3 6660.53  455.62
   4   1  -3 6533.70  322.82
  -4   1   3 6008.21  287.07
  -4  -1   3 6564.46  322.43
  -4  -1   3 6080.66  347.88
   4  -1  -3 6395.84  375.90
  -4  -1   3 6441.39  381.51
   4  -1  -3 5945.86  340.08
  -4   1   2   18.08   19.10
   4   1  -2   27.92   22.43
  -4   1   2   51.33   21.66
   4   1  -2   58.14   16.11
   4   1  -2   32.80   23.11
  -4   1   2   30.02   13.56
  -4  -1   2   43.42   22.77
   4  -1  -2   11.89   33.03
  -4  -1   2   45.11   20.87
   4  -1  -2   34.35   14.52
   4  -1  -2   63.64   34.08
  -4  -1   2   24.56   29.93
   4   1  -1   23.55   49.42
  -4   1   1   96.60   44.15
   4   1  -1  133.02   46.13
   4   1  -1   99.66   44.28
  -4   1   1  172.62  100.61
  -4   1   1  117.92   45.71
   4  -1  -1  100.61   44.76
  -4  -1   1   73.54   54.09
  -4  -1   1  106.01   49.78
   4  -1  -1  107.86   32.52
  -4  -1   1  101.03   34.32
   4  -1  -1  153.85   64.41
   4   1   0  608.81  198.68
  -4   1   0  791.43  144.87
  -4   1   0  661.01   65.34
   4   1   0  503.01   34.24
   4   1   0  630.00   41.30
   4  -1   0  718.15  134.36
   4  -1   0  744.89  113.55
  -4  -1   0  626.28   73.04
   4  -1   0  635.09   38.47
  -4  -1   0  613.06   60.44
  -4   1  -1 3935.27  229.68
  -4   1  -1 3650.72  224.19
   4   1   1 3388.82  228.95
   4   1   1 3576.86  196.86
   4   1   1 3648.60  195.10
  -4   1  -1 3679.22  195.20
   4  -1   1 3535.69  229.41
  -4  -1  -1 3821.06  244.00
   4  -1   1 3727.48  235.76
  -4  -1  -1 3457.67  185.09
  -4  -1  -1 3973.16  220.13
   4  -1   1 2866.25  152.10
  -4   1  -2  921.55   79.25
  -4   1  -2  787.51   78.23
   4   1   2  993.67  286.69
  -4   1  -2  625.82   38.38
   4   1   2  833.96   59.56
   4   1   2  946.95   73.20
   4  -1   2  665.27   39.44
  -4  -1  -2  775.92   38.35
   4  -1   2  945.20   88.96
  -4  -1  -2  892.51   94.29
   4  -1   2  790.63  123.60
  -4  -1  -2  901.81   49.58
   4   1   3 8121.75  418.73
  -4   1  -3 6795.21  354.77
  -4   1  -3 6821.43  375.55
   4   1   3 6827.00  368.48
   4   1   3 6378.90  370.78
  -4   1  -3 4979.57  257.06
   4  -1   3 5393.50  280.86
   4  -1   3 6425.58  341.33
   4  -1   3 6466.08  375.79
  -4  -1  -3 6916.28  381.49
  -4   1  -4 1366.38   83.71
  -4   1  -4 1734.53  124.67
  -4   1  -4 1787.60  109.91
   4   1   4 1957.34  116.57
   4   1   4 1817.86  140.89
   4  -1   4 1728.26  132.19
  -4  -1  -4 1530.72   95.92
  -4  -1  -4 1907.57  189.37
   4  -1   4 1505.98   88.37
   4  -1   4 1783.63  119.99
  -4   1  -5 3366.55  226.85
  -4   1  -5 3351.96  217.08
   4   1   5 3268.68  199.43
  -4   1  -5 2505.29  150.83
   4   1   5 3262.12  278.98
  -4  -1  -5 3215.88  206.17
   4  -1   5 3222.07  202.25
   4  -1   5 2769.07  165.12
   4  -1   5 3153.74  218.51
  -4  -1  -5 2892.73  202.46
  -4   1  -6 1935.32  175.97
   4   1   6 1873.63  156.42
  -4   1  -6 2517.04  226.77
  -4   1  -6 2356.40  192.72
   4   1   6 2274.86  315.29
   4  -1   6 2170.09  210.74
  -4  -1  -6 1979.73  166.76
  -4  -1  -6 2132.20  188.18
   4  -1   6 2075.83  248.13
   4  -1   6 1892.00  177.66
   4   1   7 2995.02  221.06
  -4   1  -7 2698.86  236.87
  -4   1  -7 2801.02  239.39
   4   1   7 3081.38  224.84
   4   1   7 2952.48  292.42
   4   1   7 2389.70  194.12
  -4   1  -7 3216.36  258.96
  -4  -1  -7 4341.75  438.68
  -4  -1  -7 2549.27  214.01
   4  -1   7 2495.43  203.68
   4  -1   7 3170.35  280.03
   4  -1   7 2705.04  409.95
  -4   1  -8 1055.15   99.99
   4   1   8  931.43   59.18
  -4   1  -8  890.57   83.89
   4   1   8  856.09  209.56
   4   1   8  922.74   78.05
   4   1   8 1129.29  372.04
  -4  -1  -8  733.05   69.33
   4  -1   8  826.22  363.73
   4  -1   8  877.11  111.73
   4  -1   8  826.77  107.13
  -4  -1  -8 1118.64  355.46
   4  -1   8  848.48   77.90
   4   1   9 2090.12  261.03
  -4   1  -9 2092.79  200.33
   4   1   9 1995.45  169.37
   4   1   9 1862.20  208.46
  -4   1  -9 1873.58  203.60
   4   1   9 1872.90  174.27
   4   1   9 1595.17  177.02
   4  -1   9 1797.30  391.88
   4  -1   9 1859.13  315.05
   4  -1   9 1756.70  186.15
   4  -1   9 1749.76  308.84
  -4   1 -10    5.11   15.79
   4   1  10    8.11   19.99
   4   1  10   10.20   34.27
   4   1  10   13.71   16.36
   4   1  10   12.39   26.40
   4   1  10   28.16   36.41
   4   1  10   19.29   14.57
  -4   1 -10   15.70   22.69
   4  -1  10    3.89   21.85
   4  -1  10   28.11   28.76
   4  -1  10    2.46   13.23
   4  -1  10    5.61   16.47
   4   1  11  163.22   55.26
  -4   1 -11  234.95   83.35
   4   1  11  118.78   66.29
   4   1  11  111.41   75.46
   4   1  11  127.03   96.23
   4   1  11  191.81   72.77
   4  -1  11  155.75   50.26
   4  -1  11  105.03   62.09
   4  -1  11   97.62  123.13
  -4   1 -12 1210.14  258.20
   4   1  12  972.39  376.32
   4   1  12 1041.09  205.76
   4   1  12 1101.78  172.18
   4   1  12 1010.94  539.18
   4  -1  12  982.04  409.68
   4  -1  12 1102.16  151.28
   4  -1  12 1037.55  268.68
  -4   1 -13  795.27  246.69
   4   1  13  802.63  130.68
   4   1  13  875.20  212.75
   4   1  13  569.48  325.14
   4  -1  13  790.50  197.86
   4  -1  13  685.61  295.18
   4   1  14  298.22  403.55
   4   1  14  480.27  273.71
  -4   1 -14  515.13  224.15
   4  -1  14  330.49  320.71
   4  -1  14  598.77  389.70
   4   1  15  226.15  135.62
   4   1  15   43.04   57.65
  -4   1 -15  109.10   48.30
   4  -1  15  155.69  143.78
   4   1  16   85.28   98.71
   4   1  16  129.47   79.19
   4  -1  16  159.25  111.23
   4   1  17  142.70  386.71
  -4   2  17   32.08   71.40
  -4   2  16  188.60  206.11
  -4   2  16  148.16  184.27
  -4  -2  16  357.40  208.81
  -4  -2  16  252.59  222.16
  -4   2  15   19.83   68.40
  -4   2  15  -24.46   60.79
  -4  -2  15   17.47   37.66
  -4  -2  15   27.50   37.52
  -4   2  14  118.14  115.67
  -4   2  14  112.47   96.79
   4   2 -14  198.62   78.87
  -4   2  14  132.59  122.32
  -4  -2  14  115.62   99.17
  -4  -2  14  158.97  103.88
  -4   2  13  -42.54   58.34
  -4   2  13    6.83   15.00
  -4   2  13    3.37   27.69
   4   2 -13   39.24   21.46
   4   2 -13   20.10   51.80
  -4   2  13   34.63   44.44
  -4  -2  13    0.80   49.32
  -4   2  12  877.54  250.41
  -4   2  12  813.43  418.51
  -4   2  12  931.58  183.46
  -4   2  12 1044.39  152.19
   4   2 -12  954.90  446.45
  -4   2  12  682.14  170.42
   4   2 -12 1147.99  128.12
  -4  -2  12  936.44  233.17
  -4  -2  12  737.50  327.02
  -4   2  11 1002.02  201.38
   4   2 -11  684.12   66.50
  -4   2  11  723.28  245.02
  -4   2  11  559.33  355.99
  -4   2  11  671.60  139.07
  -4   2  11  479.25  409.48
   4  -2 -11  810.05  252.04
  -4  -2  11  674.71  166.26
  -4  -2  11  602.44  270.90
  -4   2  10 3032.83   92.32
   4   2 -10 2538.31   93.94
  -4   2  10 2993.60  192.00
  -4   2  10 3063.68  115.73
  -4   2  10 3490.15  233.33
  -4   2  10 3520.34  275.19
   4   2 -10 3236.63  235.02
  -4  -2  10 3786.75  309.24
  -4  -2  10 3265.61  138.39
   4  -2 -10 3058.11  194.79
  -4  -2  10 2741.90  210.35
  -4   2   9  283.28  124.44
  -4   2   9  341.97  145.46
   4   2  -9  370.44  167.27
  -4   2   9  239.89   58.20
  -4   2   9  224.15  129.55
  -4   2   9  373.29  197.46
   4   2  -9  261.65  143.89
   4   2  -9  276.71   76.66
  -4  -2   9  342.12  131.00
  -4  -2   9  382.52  165.24
  -4  -2   9  194.37   97.37
   4  -2  -9  362.32  147.73
   4   2  -8  714.47  373.74
  -4   2   8  839.54  185.44
  -4   2   8 1022.47  459.16
  -4   2   8  824.86   89.50
   4   2  -8  949.78  161.98
  -4   2   8  808.66   74.60
  -4  -2   8  798.94  367.60
   4  -2  -8 1194.51  492.24
   4  -2  -8 1026.15  284.41
  -4  -2   8  773.87  485.30
  -4  -2   8  899.46  163.85
  -4   2   7 1756.04  143.40
   4   2  -7 1363.14  130.88
  -4   2   7 1273.60  152.97
  -4   2   7 1290.63  141.83
   4   2  -7  939.02   62.01
  -4   2   7 1323.90   64.64
   4   2  -7 1308.12  324.34
  -4  -2   7 1086.12  493.93
   4  -2  -7 1094.71  130.63
  -4  -2   7 1338.45  135.33
  -4  -2   7 1265.91  225.58
   4  -2  -7 1378.48  118.83
   4   2  -6 5130.33  419.85
   4   2  -6 5881.08  416.14
  -4   2   6 4592.46  321.38
  -4   2   6 6117.63  471.09
  -4   2   6 6544.55  527.66
  -4   2   6 5871.25  415.96
   4   2  -6 5902.09  467.96
  -4  -2   6 5021.66  417.63
  -4  -2   6 6207.88  443.21
   4  -2  -6 5687.72  469.10
   4  -2  -6 5220.56  420.04
  -4  -2   6 5597.98  450.29
   4   2  -5   46.88   72.04
  -4   2   5   12.55   11.75
  -4   2   5    9.83   31.12
   4   2  -5   17.62   36.70
  -4   2   5   13.98   30.61
   4   2  -5   41.62   18.87
   4  -2  -5   21.60   14.20
  -4  -2   5   20.77   54.74
   4  -2  -5   16.34    7.48
  -4  -2   5   23.59   27.45
   4  -2  -5  135.53   78.59
  -4  -2   5   32.81   15.78
  -4   2   4  244.31   61.24
   4   2  -4  195.48   62.00
  -4   2   4  229.11   97.46
   4   2  -4  298.75  142.31
   4   2  -4  208.13   55.43
  -4   2   4  344.37  158.84
   4  -2  -4  264.57   28.85
   4  -2  -4  209.54  108.03
   4  -2  -4  178.27   65.11
  -4  -2   4  245.37   96.46
  -4  -2   4  192.04  119.88
  -4  -2   4  267.03  143.59
  -4   2   3  148.12   64.91
   4   2  -3  190.84   94.10
   4   2  -3  183.34   74.42
   4   2  -3  187.70   58.91
  -4   2   3  172.46   58.81
  -4   2   3  147.59   41.31
  -4  -2   3  203.91   51.54
  -4  -2   3  154.43   65.77
   4  -2  -3  200.31   92.48
   4  -2  -3  183.61   69.83
   4  -2  -3  192.02   84.75
  -4  -2   3  187.31   84.22
  -4   2   215441.84  741.87
  -4   2   215292.24  794.41
  -4   2   215645.18  808.90
   4   2  -211941.90  623.67
   4   2  -215804.31  807.21
   4   2  -214026.45  684.80
   4  -2  -215199.15  795.08
  -4  -2   215407.34  807.10
   4  -2  -215262.88  739.69
  -4  -2   215195.76  737.03
   4  -2  -214124.89  726.93
  -4  -2   213109.67  671.44
  -4   2   1 4500.85  259.34
   4   2  -1 3749.48  244.60
   4   2  -1 4479.21  263.14
  -4   2   1 4811.97  250.33
  -4   2   1 4334.85  270.06
   4   2  -1 4187.89  239.80
   4  -2  -1 4255.78  313.42
   4  -2  -1 4106.29  221.61
  -4  -2   1 3799.00  226.01
  -4  -2   1 4423.56  237.05
   4  -2  -1 4323.28  277.76
  -4  -2   1 4569.30  296.79
  -4   2   0  344.57   32.28
   4   2   0  368.75   43.60
   4   2   0  419.62  142.62
  -4   2   0  459.86  145.87
   4   2   0  455.23  181.04
  -4   2   0  557.94  210.93
  -4  -2   0  363.99   75.29
   4  -2   0  438.66   63.00
  -4  -2   0  429.56  165.66
  -4  -2   0  445.90  104.58
   4  -2   0  419.72  139.09
   4  -2   0  513.93   53.56
   4   2   1 4041.18  226.47
   4   2   1 3921.29  222.66
   4   2   1 3904.97  260.23
  -4   2  -1 4001.99  242.58
  -4   2  -1 3261.35  183.07
  -4   2  -1 4102.48  252.05
  -4  -2  -1 3844.22  249.83
   4  -2   1 3765.92  235.70
  -4  -2  -1 4033.65  225.67
   4  -2   1 3960.19  269.44
   4  -2   1 4544.39  251.06
  -4  -2  -1 4108.32  230.34
  -4   2  -2 2454.49  137.84
  -4   2  -2 3128.51  200.10
   4   2   2 3565.76  211.56
   4   2   2 2896.48  208.95
  -4   2  -2 3365.27  216.93
   4   2   2 3124.95  192.71
   4  -2   2 3181.98  240.63
  -4  -2  -2 3361.97  198.25
  -4  -2  -2 3415.27  238.35
   4  -2   2 3723.88  214.14
  -4  -2  -2 3107.15  173.57
   4  -2   2 3054.55  198.55
  -4   2  -3   31.62   24.13
   4   2   3   51.56   18.46
   4   2   3   52.22   22.21
   4   2   3   54.72   18.30
  -4   2  -3   53.53   26.14
   4   2   3   59.89   23.51
  -4   2  -3   51.29   35.67
  -4  -2  -3   84.87   28.79
   4  -2   3   65.76   28.28
   4  -2   3   54.88   28.46
   4  -2   3   19.10   20.30
  -4  -2  -3   57.78   22.12
   4   2   4 1476.02   72.39
   4   2   4 1507.20  132.24
  -4   2  -4 1494.21  119.55
   4   2   4 1277.27  116.41
   4   2   4 1524.70  104.00
  -4   2  -4 1477.79  110.99
   4  -2   4 1489.82  136.40
   4  -2   4 1418.80  139.80
  -4  -2  -4 1491.10   73.53
  -4  -2  -4 1702.33  122.84
   4  -2   4 1458.24  100.72
   4   2   5  617.07  218.65
   4   2   5  692.71  215.18
  -4   2  -5  577.06  218.97
   4   2   5  512.13   25.24
   4   2   5  663.01  193.48
   4   2   5  557.61   32.35
  -4   2  -5  738.04  230.18
  -4   2  -5  547.28   53.17
  -4  -2  -5  621.84  192.39
   4  -2   5  682.62  296.74
   4  -2   5  539.71   90.44
   4  -2   5  573.79   93.77
   4   2   6 1180.96  316.78
   4   2   6  763.82   28.86
   4   2   6  775.85   40.40
   4   2   6  691.48  103.07
  -4   2  -6  531.36   59.69
   4   2   6  770.26   78.71
  -4   2  -6  702.84  111.78
  -4   2  -6  793.35  128.61
   4  -2   6  764.58  309.83
   4  -2   6  808.23  263.32
   4  -2   6  902.77  240.96
  -4  -2  -6  868.34  253.25
   4   2   7 1169.37  283.93
  -4   2  -7  914.32  301.67
   4   2   7 1082.34  236.63
   4   2   7 1097.47  277.91
   4   2   7  967.36   71.53
   4   2   7  882.52   44.01
  -4   2  -7  640.52   96.42
  -4  -2  -7  972.52  231.10
   4  -2   7  809.81  316.09
   4  -2   7  927.43  354.40
   4  -2   7  922.49   88.52
   4  -2   7  882.76  138.18
   4   2   8  531.54  212.44
   4   2   8  479.70  156.43
   4   2   8  560.53   40.76
   4   2   8  599.47   96.31
  -4   2  -8  482.70   81.89
   4   2   8  646.73  301.92
  -4   2  -8  683.83  230.51
   4  -2   8  615.00  198.62
  -4  -2  -8  537.45  222.72
   4  -2   8  595.25   92.54
   4  -2   8  540.50  178.41
   4  -2   8  572.51  239.07
   4   2   9   30.41   25.96
   4   2   9   16.21   25.43
   4   2   9   37.12   20.74
   4   2   9   16.15   20.63
   4   2   9   11.92   12.39
  -4   2  -9   31.21   32.72
  -4   2  -9    5.53   29.65
   4  -2   9   11.89   25.88
  -4  -2  -9   33.47   24.48
   4  -2   9   60.12   41.69
   4  -2   9   12.37   19.40
   4  -2   9   25.59   33.35
   4   2  10  523.32  100.17
  -4   2 -10  419.38  224.56
   4   2  10  413.49  159.16
   4   2  10  474.47  169.91
   4   2  10  504.67  126.74
  -4   2 -10  508.65  155.82
   4   2  10  485.20  241.01
   4  -2  10  384.62  255.35
   4  -2  10  725.93  221.37
   4   2  11  151.67   70.97
  -4   2 -11  120.83   44.26
  -4   2 -11  116.19   68.56
   4   2  11   77.27   65.04
   4   2  11   89.64   58.10
   4   2  11   80.82   92.84
   4   2  11   77.68   38.76
   4  -2  11  101.66   56.37
   4  -2  11   97.51   76.51
   4   2  12 2098.99  439.67
   4   2  13   59.46   56.02
  -4   2 -13   37.30   41.14
   4   2  13   57.40   40.79
   4  -2  13   88.39   47.40
   4  -2  13   99.71   68.28
  -4   2 -14 1952.15  491.60
   4   2  14 1517.61  386.05
   4   2  14 1397.36  357.24
   4  -2  14 2014.14  259.90
   4  -2  14 1599.49  277.01
   4   2  15  131.76   78.64
  -4   2 -15  109.05   43.09
   4   2  15   82.40   88.95
   4  -2  15   34.40   50.45
   4   2  16    7.86   44.53
   4   2  16   55.90   57.40
  -4   2 -16   63.12   59.47
  -4   3  16   63.99   69.47
  -4  -3  16   40.15   81.56
  -4   3  15 1795.29  274.12
  -4  -3  15 1087.04  444.49
  -4  -3  15 1634.00  484.23
  -4   3  14  282.45  210.25
   4   3 -14  293.06  147.25
  -4   3  14  197.69  227.03
  -4  -3  14  228.44  204.59
  -4   3  13 1230.43  158.40
  -4   3  13  900.28  496.22
   4   3 -13 1157.09  105.29
   4   3 -13  752.79  447.27
  -4   3  13 1210.60  113.69
  -4  -3  13  667.09  487.82
  -4   3  12   14.57   12.26
  -4   3  12   20.49   29.71
  -4   3  12   48.90   36.54
   4   3 -12   22.53   32.36
  -4   3  12   16.97   30.27
  -4   3  12   35.73   24.98
   4   3 -12   50.96   24.64
  -4  -3  12    2.77   29.57
  -4  -3  12   10.63   19.81
  -4   3  11   35.06   23.68
  -4   3  11   26.36   21.31
  -4   3  11   43.56   17.55
  -4   3  11   19.48   31.71
   4   3 -11   62.72   23.87
  -4   3  11   35.20   64.73
   4   3 -11   40.40   37.68
  -4  -3  11   13.04   18.48
  -4  -3  11   30.37   27.96
   4   3 -10 2444.62  308.23
  -4   3  10 2225.91  233.28
  -4   3  10 2533.14  292.43
   4   3 -10 3134.76  359.12
  -4   3  10 2617.09  374.27
  -4   3  10 2253.61  231.36
  -4  -3  10 2036.07  330.34
   4  -3 -10 2413.32  277.59
  -4  -3  10 2484.25  274.13
   4  -3 -10 2295.71  713.85
   4   3  -9 7948.06  614.72
   4   3  -9 6540.03  450.00
  -4   3   9 7456.76  515.67
   4   3  -9 8542.48  656.37
  -4   3   9 8642.13  671.36
  -4   3   9 9909.26  662.82
  -4   3   9 8511.95  629.81
   4  -3  -9 7724.78  539.08
  -4  -3   9 7371.02  614.87
   4  -3  -9 8375.55  662.71
  -4  -3   9 8589.40  648.27
   4   3  -8  287.64  105.58
  -4   3   8  297.91   71.54
   4   3  -8  300.17  111.66
  -4   3   8  278.47  129.54
   4   3  -8  361.62  190.77
  -4   3   8  338.68  163.42
  -4   3   8  353.61  167.91
  -4  -3   8  439.08  195.01
  -4  -3   8  324.11  196.46
   4  -3  -8  351.07  128.42
  -4  -3   8  305.17  104.77
   4  -3  -8  450.47  174.57
   4   3  -7 2898.77  265.55
  -4   3   7 3266.82  347.68
  -4   3   7 2859.09  284.87
   4   3  -7 2879.55  292.61
  -4   3   7 3050.61  254.29
   4   3  -7 3006.73  208.30
   4  -3  -7 3160.12  227.80
  -4  -3   7 2865.74  271.62
  -4  -3   7 2531.82  237.09
  -4  -3   7 3171.49  240.03
   4  -3  -7 2783.46  194.15
   4  -3  -7 3179.31  620.76
   4   3  -6  118.13   60.69
   4   3  -6   63.25   33.21
   4   3  -6   95.69   43.59
  -4   3   6   59.87   65.06
  -4   3   6   53.94   18.44
  -4   3   6   79.11   41.18
   4  -3  -6   52.48   48.65
   4  -3  -6  122.36   42.10
   4  -3  -6   76.27   29.08
  -4  -3   6  115.32   55.11
  -4  -3   6   27.46   56.74
  -4  -3   6  103.94   40.35
  -4   3   5 4121.76  320.04
   4   3  -5 4280.21  363.70
  -4   3   5 3855.85  293.59
   4   3  -5 3638.66  316.76
  -4   3   5 3699.14  326.46
   4   3  -5 3879.42  297.38
   4  -3  -5 3825.92  355.22
  -4  -3   5 3196.53  284.24
   4  -3  -5 3230.66  248.13
   4  -3  -5 4290.41  316.69
  -4  -3   5 4075.46  341.55
  -4  -3   5 3146.21  568.37
  -4   3   4  221.21   87.35
  -4   3   4  173.21   69.90
   4   3  -4  206.99   73.10
   4   3  -4  170.46   63.66
   4   3  -4  215.83  120.37
  -4   3   4  229.24   96.11
   4  -3  -4  205.96   69.55
  -4  -3   4  204.63   74.62
   4  -3  -4  184.54   72.01
   4  -3  -4  160.16   60.01
  -4  -3   4  193.28   87.06
  -4  -3   4  140.72   63.61
   4   3  -3 1716.23  144.26
   4   3  -3 1506.01  105.71
  -4   3   3 1624.85  108.21
  -4   3   3 1499.29   93.04
  -4   3   3 1816.20  157.99
   4   3  -3 1521.40  252.58
  -4  -3   3 1563.30  101.36
   4  -3  -3 1729.77  110.23
   4  -3  -3 1487.88  205.12
   4  -3  -3 1657.24  117.91
  -4  -3   3 1485.34  128.83
  -4  -3   3 1429.92  136.20
  -4   3   2 2475.76  153.05
   4   3  -2 2582.86  171.55
  -4   3   2 2329.06   94.13
  -4   3   2 2805.41  300.34
   4   3  -2 2859.23  206.56
   4   3  -2 2789.88  217.63
  -4  -3   2 2691.40  198.25
  -4  -3   2 2643.42  164.08
   4  -3  -2 2721.04  192.22
   4  -3  -2 2475.25  167.32
   4  -3  -2 2343.93  155.61
  -4  -3   2 2542.60  203.40
   4   3  -121074.21 1008.51
  -4   3   123184.46  475.79
  -4   3   122147.73 1043.84
   4   3  -122575.09  470.48
  -4   3   121734.99 1030.89
  -4  -3   122620.64  314.11
   4  -3  -121035.20 1023.18
  -4  -3   121429.78 1053.54
   4  -3  -121160.98 1057.39
   4  -3  -122097.92 1046.83
  -4  -3   123614.36  492.25
   4   3   0 2463.63  180.99
   4   3   0 2676.32  169.25
  -4   3   0 3200.45  376.37
  -4   3   0 2979.95  180.06
   4   3   0 2813.83  185.12
  -4   3   0 2719.89  169.36
  -4  -3   0 2756.78  184.14
  -4  -3   0 2854.30  209.17
   4  -3   0 2674.44  298.99
   4  -3   0 2730.12  199.38
  -4  -3   0 2820.89  173.03
   4  -3   0 2891.09  189.26
  -4   3  -115131.10  729.57
   4   3   114352.38  703.76
   4   3   114347.16  752.42
  -4   3  -115653.53  822.17
   4   3   114054.03  693.99
  -4   3  -114270.38  713.87
  -4  -3  -115504.99  753.24
   4  -3   114218.91  691.74
   4  -3   114791.26  758.19
  -4  -3  -114230.60  703.01
   4  -3   114639.94  736.55
  -4  -3  -116180.33  821.83
  -4   3  -2  298.89  136.04
   4   3   2  232.80  115.96
   4   3   2  243.56  181.56
   4   3   2  259.16  116.64
  -4   3  -2  339.82  120.30
  -4   3  -2  319.47  103.07
   4  -3   2  204.65   99.05
  -4  -3  -2  331.20  141.83
  -4  -3  -2  347.86  133.04
  -4  -3  -2  317.72  104.12
   4  -3   2  244.90   92.56
   4  -3   2  225.42   66.72
   4   3   3 9033.45  454.70
  -4   3  -3 8999.34  508.14
   4   3   3 8808.69  500.55
  -4   3  -310816.87  573.99
  -4   3  -3 6915.94  350.46
   4   3   3 8578.29  452.48
  -4  -3  -3 8552.94  456.91
  -4  -3  -3 8388.79  424.87
  -4  -3  -3 8835.40  464.26
   4  -3   3 9210.91  475.63
   4  -3   3 8296.12  460.28
   4  -3   3 8403.99  456.90
  -4   3  -4   -0.90   16.42
   4   3   4   14.12   25.53
   4   3   4   13.73   41.89
  -4   3  -4    4.38   21.49
   4   3   4   12.69   13.85
  -4   3  -4   15.44   13.39
   4  -3   4   20.68   33.67
  -4  -3  -4   13.22   13.46
   4  -3   4  -13.50   33.41
   4  -3   4   20.45   20.85
  -4  -3  -4    8.59   12.29
  -4  -3  -4   31.52   28.10
  -4   3  -5 5500.63  436.25
   4   3   5 5350.77  449.18
   4   3   5 4948.66  380.35
   4   3   5 5502.61  517.78
  -4   3  -5 5129.78  400.46
   4   3   5 5388.90  393.38
  -4   3  -5 4645.34  351.22
   4  -3   5 5221.53  441.72
  -4  -3  -5 5717.83  436.58
  -4  -3  -5 5670.72  422.26
   4  -3   5 6251.27  481.61
   4  -3   5 4871.04  402.95
  -4   3  -6  230.63   70.84
   4   3   6  116.75   47.05
  -4   3  -6   54.40   18.69
   4   3   6  113.74   72.28
   4   3   6  110.74   48.94
   4   3   6   91.67   47.36
  -4  -3  -6   67.39   28.21
   4  -3   6   43.98   45.71
  -4  -3  -6   92.65   34.35
   4  -3   6   89.60   35.30
   4  -3   6   94.13   43.34
   4  -3   6  108.14   43.63
   4   3   7 4095.90  369.98
  -4   3  -7 4606.08  389.30
  -4   3  -7 4473.96  392.88
   4   3   7 4337.73  361.18
   4   3   7 4877.27  418.22
   4   3   7 3903.24  371.86
   4  -3   7 3702.39  338.07
  -4  -3  -7 5013.27  411.85
   4  -3   7 5328.47  463.94
  -4  -3  -7 4228.68  359.10
   4  -3   7 4111.26  380.99
   4  -3   7 3722.23  344.46
   4   3   8  227.66  100.39
  -4   3  -8  282.90  111.04
   4   3   8  238.55  105.89
   4   3   8  238.89  140.41
  -4   3  -8  233.48   86.93
   4   3   8  288.48   85.78
   4   3   8  349.75  108.52
   4  -3   8  320.91  133.73
   4  -3   8  247.41  112.02
  -4  -3  -8  270.02  142.88
   4  -3   8  283.60  116.56
   4  -3   8  305.49   98.81
   4   3   9 1616.10   87.53
   4   3   9 1680.57  146.29
   4   3   9 1624.83  227.60
  -4   3  -9 1266.78  259.26
   4   3   9 1791.74  228.69
   4   3   9 1461.78  478.41
  -4   3  -9 1985.50  568.17
   4  -3   9 1521.46  147.96
  -4  -3  -9 1502.64  110.82
   4  -3   9 1570.51  495.18
  -4   3 -10  446.64  183.14
   4   3  10  573.29   96.99
   4   3  10  424.99  240.09
   4   3  10  506.43  211.73
   4   3  10  541.02   82.62
   4   3  10  710.38  232.13
  -4   3 -10  500.77  312.78
   4  -3  10  596.95  203.57
   4  -3  10  663.70  309.11
   4   3  11 3466.96  425.48
   4   3  11 3047.57  364.51
  -4   3 -11 2692.73  337.99
   4   3  11 3085.88  529.85
   4   3  11 3278.32  420.30
   4   3  11 3277.50  422.46
  -4   3 -11 3622.79  466.45
   4  -3  11 3431.13  533.64
   4  -3  11 3453.30  454.95
  -4   3 -12  -13.30   52.95
   4   3  12    8.11   36.01
   4   3  12  -11.74   52.67
   4   3  12   -0.72   16.32
  -4   3 -12   38.83   37.25
   4   3  12   -5.66   55.32
   4  -3  12   22.39   62.06
   4  -3  12   43.47   33.78
  -4   3 -13  612.38  249.23
   4   3  13  501.31  116.47
   4   3  13  495.34  279.80
   4  -3  13  588.90  267.70
   4  -3  13  405.54  314.08
   4   3  14   81.29   54.57
   4   3  14   30.90   70.86
  -4   3 -14  111.87   57.80
   4  -3  14   33.36   37.78
   4  -3  14   53.88   52.41
  -4   3 -15  891.91  347.89
   4   3  15  469.03  369.23
   4   3  15  576.13  506.69
   4   3  16  -34.31   58.32
  -4   4  16  230.92  222.42
  -4   4  15   53.59   66.35
  -4  -4  15   63.93   57.88
   4   4 -14  384.31  164.76
  -4   4  14  311.35  346.15
  -4  -4  14  327.86  276.39
  -4  -4  14  453.99  202.05
  -4   4  13   41.70   30.98
  -4   4  13   42.99   44.05
   4   4 -13   48.16   33.51
  -4   4  13   51.12   40.96
   4   4 -13   43.65   52.74
  -4  -4  13   20.38   63.20
  -4   4  12  287.44  139.38
   4   4 -12  343.59  115.53
  -4   4  12  192.20  160.08
   4   4 -12  279.05   82.56
  -4   4  12  197.76  199.98
  -4  -4  12  264.10  155.69
  -4  -4  12  227.05  125.82
  -4   4  11    8.19   17.23
   4   4 -11   22.82   37.19
  -4   4  11   11.01   27.28
  -4   4  11   21.33   19.13
  -4   4  11   11.33   17.40
   4   4 -11   42.83   98.58
  -4  -4  11   13.53   19.61
   4  -4 -11   23.05   61.28
  -4  -4  11   25.30   34.86
  -4   4  10  495.96   88.22
  -4   4  10  284.60  156.33
   4   4 -10  371.64  107.74
   4   4 -10  442.47  216.55
  -4   4  10  262.77  204.43
  -4   4  10  261.51  208.78
   4  -4 -10  348.80  117.79
  -4  -4  10  392.68  225.98
  -4  -4  10  336.13  172.64
  -4   4   9    9.95   29.93
   4   4  -9   32.76   72.61
  -4   4   9   27.93   25.50
   4   4  -9   52.30   22.73
  -4   4   9   71.80   87.62
  -4   4   9   11.69   19.80
  -4   4   9   53.11   24.36
  -4  -4   9   50.74   63.94
  -4  -4   9    7.02   27.52
   4  -4  -9   64.71   82.21
   4   4  -825174.40 1651.33
  -4   4   826121.15 1724.45
  -4   4   827668.12  680.50
  -4   4   827293.11  421.98
   4   4  -825710.29 1750.16
   4  -4  -824882.83 1722.22
  -4  -4   826351.06  703.92
   4  -4  -825847.50 1674.05
  -4  -4   827253.56  463.13
   4  -4  -826580.27  488.25
  -4   4   7  249.47  108.10
  -4   4   7  296.30  145.18
   4   4  -7  417.58  154.31
   4   4  -7  341.58  112.42
  -4   4   7  263.47  145.85
   4   4  -7  321.84  178.20
   4  -4  -7  486.25  154.20
  -4  -4   7  392.64  129.57
   4  -4  -7  382.69  131.58
  -4  -4   7  255.19  132.81
   4  -4  -7  350.57  110.22
  -4  -4   7  383.17  137.82
  -4   4   6 4565.70  373.30
   4   4  -6 4536.28  376.00
  -4   4   6 4592.66  401.60
   4   4  -6 4364.98  418.63
  -4   4   6 4914.64  530.78
   4   4  -6 4699.75  434.11
   4  -4  -6 4994.16  394.23
   4  -4  -6 5158.24  418.04
  -4  -4   6 4803.98  402.69
  -4  -4   6 4961.58  478.56
   4  -4  -6 4435.14  446.82
  -4  -4   6 4080.13  388.30
  -4   4   5   18.04   44.00
   4   4  -5   23.28   36.22
  -4   4   5    5.77   14.30
   4   4  -5   14.91   38.15
   4   4  -5   28.13   19.92
  -4   4   5    7.33   28.14
   4  -4  -5   29.05   47.92
  -4  -4   5   13.34   16.09
  -4  -4   5   53.08   55.20
   4  -4  -5   23.69   11.57
  -4  -4   5   35.23   31.78
   4  -4  -5   46.44   25.78
  -4   4   4 6082.82  468.12
  -4   4   4 6651.50  542.16
  -4   4   4 6230.38  452.56
   4   4  -4 5484.73  416.26
   4   4  -4 5631.40  508.32
   4   4  -4 7040.22  567.60
   4  -4  -4 5002.97  367.63
   4  -4  -4 6175.79  475.35
  -4  -4   4 5963.69  589.69
  -4  -4   4 6189.43  468.31
   4  -4  -4 6030.71  549.53
  -4  -4   4 5504.58  458.11
  -4   4   3  317.79   45.23
   4   4  -3  449.55  201.17
   4   4  -3  406.27  176.07
   4   4  -3  394.26  145.89
  -4   4   3  375.43   75.30
  -4   4   3  471.48  202.88
  -4  -4   3  357.89  162.60
  -4  -4   3  392.59  162.63
   4  -4  -3  384.07  134.29
   4  -4  -3  411.55   54.23
   4  -4  -3  382.36   50.58
  -4  -4   3  313.24  175.91
  -4   4   2 2555.92  206.08
  -4   4   2 2901.14  219.89
   4   4  -2 2939.80  263.75
  -4   4   2 2974.25  273.59
   4   4  -2 2345.37  259.39
   4   4  -2 2800.59  233.70
   4  -4  -2 2774.17  225.30
  -4  -4   2 2625.33  240.51
   4  -4  -2 2913.16  268.83
  -4  -4   2 3070.69  249.23
  -4  -4   2 3106.66  489.90
   4  -4  -2 2946.26  259.06
  -4   4   1 2892.20  229.92
  -4   4   1 3024.81  231.26
   4   4  -1 3127.02  266.51
   4   4  -1 2750.66  251.86
   4   4  -1 2931.21  257.74
  -4   4   1 3132.78  307.66
   4  -4  -1 3172.38  336.18
  -4  -4   1 3414.96  303.36
  -4  -4   1 3164.95  277.69
   4  -4  -1 3002.29  244.16
  -4  -4   1 3038.88  246.82
   4  -4  -1 3393.59  317.48
  -4   4   0 4879.72  387.98
  -4   4   0 5275.47  391.91
   4   4   0 4498.38  350.39
   4   4   0 4710.68  375.50
  -4   4   0 4801.80  398.61
   4   4   0 4241.69  340.26
  -4  -4   0 4759.61  378.28
   4  -4   0 4695.79  365.67
  -4  -4   0 4898.55  372.07
   4  -4   0 4934.21  379.45
  -4  -4   0 5154.67  417.57
   4  -4   0 5058.08  442.87
  -4   4  -1 1847.50  310.40
   4   4   1 1746.68  167.36
   4   4   1 1509.43  149.22
   4   4   1 1801.77  167.22
  -4   4  -1 1711.29  154.63
  -4   4  -1 1792.76  159.34
   4  -4   1 1824.06  191.26
  -4  -4  -1 1839.92  208.74
   4  -4   1 1812.99  174.88
   4  -4   1 1722.02  229.25
  -4  -4  -1 1796.01  190.15
  -4  -4  -1 1897.64  169.70
   4   4   212558.21  893.45
   4   4   214750.73 1060.25
  -4   4  -212152.09  858.84
  -4   4  -214377.80 1045.79
   4   4   212662.38  911.40
  -4   4  -214217.96  996.27
   4  -4   212965.93  947.51
   4  -4   213343.62  945.38
   4  -4   212992.54  943.68
  -4  -4  -212482.28  888.18
  -4  -4  -214078.80  992.01
  -4  -4  -214256.17 1021.02
  -4   4  -3   86.37   42.17
  -4   4  -3   37.40   16.77
  -4   4  -3   31.30   20.37
   4   4   3   89.28   40.80
   4   4   3   34.43   18.34
   4   4   3   73.24   43.61
   4  -4   3   97.24   31.72
   4  -4   3   55.68   20.61
   4  -4   3   95.19   42.43
  -4  -4  -3   89.63   43.59
  -4  -4  -3  100.07   36.56
  -4  -4  -3   74.66   30.69
  -4   4  -4 7301.22  536.04
   4   4   4 8553.69  643.39
  -4   4  -4 8546.33  672.24
   4   4   4 8130.10  624.74
   4   4   4 8729.27  643.78
  -4  -4  -4 8642.88  651.41
   4  -4   4 8315.20  653.25
   4  -4   4 7984.65  614.28
  -4  -4  -4 8168.15  606.55
  -4  -4  -4 8340.80  629.24
   4  -4   4 8374.66  650.19
   4  -4   4 7712.29  604.12
  -4   4  -5  500.34  211.58
   4   4   5  523.20  289.68
  -4   4  -5  486.92  133.60
   4   4   5  666.89  282.64
   4   4   5  631.28   78.52
  -4  -4  -5  583.06   80.17
  -4  -4  -5  588.16  178.19
   4  -4   5  532.08  231.75
   4  -4   5  399.31  135.32
   4  -4   5  570.31  212.86
  -4  -4  -5  581.33  218.28
   4  -4   5  581.54  230.29
   4   4   6 3400.39  292.53
   4   4   6 4342.93  368.02
   4   4   6 3729.91  347.67
   4   4   6 3985.72  388.65
  -4   4  -6 2815.38  240.23
  -4   4  -6 4574.94  416.02
   4  -4   6 3935.22  360.69
  -4  -4  -6 4351.06  364.52
   4  -4   6 4651.85  403.36
   4  -4   6 4151.43  530.35
  -4  -4  -6 4098.39  348.00
   4  -4   6 4046.60  380.78
  -4   4  -7  152.16   46.69
  -4   4  -7  142.93   59.71
   4   4   7  111.47   57.25
   4   4   7  113.18   60.78
   4   4   7  125.20   86.88
   4   4   7  111.10   45.17
   4  -4   7  120.50   55.32
  -4  -4  -7  145.97   47.11
   4  -4   7  138.21   55.70
   4  -4   7  149.67   85.24
   4  -4   7  105.00   51.40
  -4  -4  -7  155.84   77.70
  -4   4  -8 5116.43  254.70
   4   4   8 5133.38  167.71
   4   4   8 4737.55  237.13
   4   4   8 5217.48  239.39
  -4  -4  -8 5095.50  212.93
  -4  -4  -8 5426.96  233.06
   4  -4   8 4838.28  268.60
   4  -4   8 4686.12  251.44
  -4   4  -9  280.27  160.04
   4   4   9  243.94  146.17
   4   4   9  254.49  135.53
   4   4   9  283.98  119.75
   4   4   9  283.64  185.94
   4  -4   9  226.33  121.85
   4  -4   9  324.36  162.09
  -4   4 -10  715.95  209.47
   4   4  10  883.59  394.35
   4   4  10  864.85  184.79
   4   4  10  820.91  315.13
   4   4  10  954.33  153.02
  -4   4 -10  955.39  536.97
   4   4  10 1187.15  192.40
   4  -4  10  781.69  383.72
   4  -4  10  951.05  365.93
   4   4  11  168.69  106.07
   4   4  11  101.26   65.86
  -4   4 -11  124.63   59.73
   4   4  11   31.38   64.75
   4   4  11   92.89   61.29
  -4   4 -11   78.22   87.37
   4  -4  11  207.26   84.15
   4  -4  11  155.39   89.62
  -4   4 -12 1147.00  256.45
   4   4  12 1422.10  302.10
   4   4  12 1406.25  234.99
   4  -4  12 1210.36  568.77
   4  -4  12 1312.43  400.71
   4   4  13   22.40   30.21
   4   4  13   12.90   39.64
  -4   4 -13   21.12   24.76
   4  -4  13   -8.41   73.46
   4  -4  13   20.78   41.37
  -4   4 -14  393.06  180.15
   4   4  14  310.23  224.95
   4  -4  14  406.79  305.91
   4  -4  14  193.65  408.85
   4   4  15   35.47   65.04
  -4   4 -15   55.70   38.72
  -4   5  15  262.19  455.13
  -4   5  14    3.40   58.91
  -4  -5  14   52.10   54.26
   4   5 -13  229.21  103.85
  -4   5  13  137.06  146.20
   4   5 -13  213.02  108.65
  -4  -5  13  248.95  121.58
   4   5 -12   42.06   34.82
   4   5 -12  -32.80   82.25
  -4   5  12    4.20   27.63
  -4  -5  12   36.18   52.13
   4  -5 -12   76.10   62.45
   4   5 -11 2683.38  338.56
  -4   5  11 2742.72  232.66
   4   5 -11 2036.15  150.59
  -4   5  11 3353.02  213.37
  -4  -5  11 2316.34  258.61
   4  -5 -11 2239.84 1050.75
  -4  -5  11 3477.77  227.10
   4   5 -10  545.67  252.29
  -4   5  10  782.22   79.27
  -4   5  10  760.95  110.56
   4   5 -10  589.99  228.82
  -4   5  10  585.79  228.34
  -4   5  10  693.64  168.27
   4  -5 -10  674.77  324.32
  -4  -5  10  681.75  373.42
  -4  -5  10  831.14  484.00
   4   5  -9  451.41  216.30
  -4   5   9  348.98  188.32
   4   5  -9  334.46  140.59
   4  -5  -9  395.11  127.24
  -4  -5   9  392.92  186.89
   4  -5  -9  423.93  207.02
  -4  -5   9  431.72  191.14
  -4   5   8   60.93   50.76
   4   5  -8  -10.30   48.50
  -4   5   8   67.78   64.54
   4   5  -8   93.28   32.44
   4  -5  -8   74.04   39.85
   4  -5  -8  129.04   60.98
  -4  -5   8   35.59   34.37
  -4  -5   8   31.34   42.88
   4   5  -7 3480.59  188.66
  -4   5   7 3464.59  168.29
  -4   5   7 3481.52  268.78
   4   5  -7 2992.87  221.89
  -4  -5   7 3057.37  233.79
  -4  -5   7 3259.22  176.93
   4  -5  -7 3297.51  349.04
   4  -5  -7 3654.12  157.33
  -4   5   6 2386.26  247.76
   4   5  -6 2235.20  197.61
   4   5  -6 2109.37  357.40
   4   5  -6 2411.82  244.72
  -4   5   6 2325.08  300.24
  -4  -5   6 1973.87  473.86
   4  -5  -6 2714.21  221.55
   4  -5  -6 2173.88  243.43
  -4  -5   6 2600.45  274.41
  -4  -5   6 2495.06  265.00
   4   5  -5 6214.60  608.98
   4   5  -5 4762.66  417.44
   4   5  -5 5382.29  738.53
  -4   5   5 4850.14  430.55
  -4   5   5 5097.52  473.34
   4  -5  -5 5441.75  460.05
  -4  -5   5 4444.32  440.94
  -4  -5   5 4909.60  455.80
  -4  -5   5 5171.86  434.89
   4  -5  -5 5062.08  476.98
   4   5  -4   90.75   67.06
  -4   5   4  194.18   66.67
   4   5  -4  182.31   69.89
   4   5  -4  182.79   92.70
  -4   5   4  279.83   95.66
  -4  -5   4  164.34   60.61
   4  -5  -4  193.78   81.67
   4  -5  -4  162.66   39.78
   4  -5  -4  255.24   99.60
  -4  -5   4  175.91   87.45
  -4  -5   4  170.12  106.19
   4   5  -3 3057.20  556.68
  -4   5   3 3093.86  284.85
   4   5  -3 2519.73  204.13
  -4   5   3 2623.33  204.38
  -4   5   3 2588.99  171.01
   4   5  -3 2819.06  264.16
   4  -5  -3 2980.91  278.14
  -4  -5   3 2736.58  285.37
   4  -5  -3 2773.30  222.96
  -4  -5   3 2576.91  292.66
  -4  -5   3 2882.87  325.22
   4  -5  -3 2719.32  255.84
  -4   5   2   84.51   43.30
  -4   5   2  272.88  145.73
   4   5  -2  136.07   52.18
   4   5  -2  128.62   76.65
   4   5  -2  188.16   79.66
  -4   5   2  133.59   60.83
  -4  -5   2   99.29   57.31
  -4  -5   2  119.11   44.21
   4  -5  -2  182.42   92.17
  -4  -5   2  146.64   48.99
   4  -5  -2  138.24   60.13
   4  -5  -2   90.07   80.23
   4   5  -1 5826.58  457.24
   4   5  -1 5773.16  468.84
  -4   5   1 5666.58  498.54
   4   5  -1 4746.16  382.40
  -4   5   1 5390.59  446.09
   4  -5  -1 5655.14  480.64
   4  -5  -1 5682.01  437.43
  -4  -5   1 6405.99  525.49
  -4  -5   1 6326.83  485.93
  -4  -5   1 5288.88  438.24
   4  -5  -1 6239.88  481.36
  -4   5   0 4603.09  451.78
  -4   5   0 3981.12  368.54
   4   5   0 4246.90  359.31
   4   5   0 4224.01  395.01
   4   5   0 3430.43  323.18
   4  -5   0 4130.81  370.60
   4  -5   0 4263.39  344.35
  -4  -5   0 4593.25  383.33
  -4  -5   0 4595.02  426.49
   4  -5   0 4131.69  322.69
   4  -5   0 4436.39  390.05
  -4  -5   0 4305.93  408.19
   4   5   1 3805.74  326.22
  -4   5  -1 4127.52  369.97
  -4   5  -1 3814.47  317.68
   4   5   1 4131.00  350.10
   4   5   1 3598.40  321.94
   4  -5   1 3229.02  315.01
   4  -5   1 3844.27  308.49
   4  -5   1 4160.29  351.95
  -4  -5  -1 3358.86  294.65
  -4  -5  -1 3854.38  316.43
   4  -5   1 3900.60  323.00
  -4  -5  -1 4207.69  394.40
  -4   5  -2  307.09  116.41
   4   5   2  277.34   65.63
   4   5   2  282.59  138.39
  -4   5  -2  323.87  102.39
   4   5   2  385.01  198.03
   4  -5   2  429.42  167.18
   4  -5   2  343.06  129.29
  -4  -5  -2  292.60  101.44
  -4  -5  -2  324.62  123.10
  -4  -5  -2  340.56  157.09
   4  -5   2  280.00  155.37
   4  -5   2  301.25  126.10
  -4   5  -3 8027.77  568.86
   4   5   3 6531.40  447.27
   4   5   3 7170.10  489.41
   4   5   3 8305.89  555.73
  -4   5  -3 8088.05  571.39
  -4  -5  -3 8270.50  556.92
   4  -5   3 7875.85  535.53
   4  -5   3 7189.80  523.55
   4  -5   3 7910.05  536.61
  -4  -5  -3 7374.16  497.64
  -4  -5  -3 7954.50  535.01
   4  -5   3 8026.88  538.08
   4   5   4    6.76   32.57
   4   5   4   11.49   31.51
  -4   5  -4   31.75   37.36
   4   5   4  -10.93   40.38
  -4   5  -4   12.21   27.33
   4  -5   4    9.78   37.87
  -4  -5  -4    9.27   21.99
   4  -5   4   -5.66   42.53
  -4  -5  -4   -6.49   19.99
  -4  -5  -4    7.64   17.20
   4  -5   4   31.08   40.03
   4  -5   4    5.30   42.55
   4   5   5 8056.90  621.11
  -4   5  -5 7866.98  655.85
   4   5   5 7405.03  599.37
  -4   5  -5 6367.53  493.47
   4   5   5 7171.52  568.20
  -4  -5  -5 7793.45  586.80
   4  -5   5 7080.91  572.71
   4  -5   5 7566.91 1131.27
   4  -5   5 7911.19  617.77
   4  -5   5 7597.32  611.91
  -4  -5  -5 8020.64  638.88
  -4  -5  -5 7291.34  574.66
   4   5   6   -1.60   30.04
  -4   5  -6   20.75   19.81
   4   5   6  -13.17   38.40
   4   5   6   26.43   30.63
  -4   5  -6   -3.61   26.39
   4  -5   6    1.13   19.82
  -4  -5  -6   15.77   24.68
   4  -5   6    5.62   40.15
  -4  -5  -6    1.49   15.50
   4  -5   6   52.66   57.13
  -4  -5  -6    1.82   20.50
   4  -5   6   19.00   27.47
   4   5   7 2007.17  194.17
   4   5   7 1897.19  169.94
  -4   5  -7 1456.51   97.06
   4   5   7 1963.83  190.28
  -4   5  -7 2307.56  196.73
   4  -5   7 1944.11  446.42
  -4  -5  -7 2186.48  115.61
  -4  -5  -7 2208.46  161.46
   4  -5   7 1943.98  245.83
   4   5   8  423.79  204.88
  -4   5  -8  607.86  184.06
  -4   5  -8  456.93  249.92
   4   5   8  423.48  132.53
   4   5   8  382.59  265.62
  -4  -5  -8  470.93  137.78
   4  -5   8  312.00  197.22
  -4  -5  -8  433.22  185.55
   4  -5   8  443.24  194.21
   4   5   9 1848.94  334.40
   4   5   9 1758.18  423.90
  -4   5  -9 4248.20  667.03
   4   5   9 1901.36  255.65
   4   5   9 1912.63  342.97
  -4  -5  -9 2302.81  300.42
   4  -5   9 1739.20  337.15
   4  -5   9 1988.32  468.56
   4   5  10   91.09   96.03
   4   5  10  106.84   71.30
   4   5  10  117.41   98.21
  -4   5 -10  156.75   76.66
   4   5  10   97.41   67.79
   4  -5  10   52.66   68.16
  -4  -5 -10  108.31   86.89
   4  -5  10  116.62   78.37
   4   5  11  753.08  256.31
   4   5  11  727.20  387.79
   4   5  11  857.30  110.81
  -4   5 -11  734.63  166.30
   4  -5  11  853.39  169.35
   4  -5  11  800.79  408.57
  -4   5 -12  288.79  107.80
   4   5  12  355.89  246.24
   4  -5  12  325.91  298.15
   4  -5  12  537.56  259.11
  -4   5 -13  291.65  197.23
   4   5  13  206.71  246.09
   4  -5  13  259.84  254.14
   4  -5  13  290.49  205.86
   4   5  14  131.78  174.15
  -4   5 -14  247.42  138.13
   4  -5  14  254.09  194.76
  -4   6  15    2.34   60.03
  -4   6  14  176.28  280.87
   4   6 -13   35.57   58.87
  -4  -6  13    8.38   58.81
   4  -6 -13   -9.71  115.82
   4   6 -12 3006.79  475.98
   4   6 -12 3321.21  581.69
  -4   6  12 3194.17  519.58
   4  -6 -12 2254.52 1208.95
  -4  -6  12 2843.79  549.06
   4   6 -11   72.34   42.72
  -4   6  11  133.67   71.28
   4   6 -11   74.92   29.57
  -4  -6  11   32.10   44.72
   4  -6 -11   66.37   56.76
   4   6 -10 1555.45  296.67
   4   6 -10 1436.34  268.96
   4  -6 -10    2.63   14.69
   4  -6 -10 1493.86  689.62
  -4  -6  10 1579.06  437.75
   4   6  -9  464.14  229.77
  -4   6   9  370.40  296.90
   4   6  -9  517.17  223.34
   4  -6  -9  421.51  211.38
  -4  -6   9  329.01  192.07
   4  -6  -9  478.31  328.72
   4   6  -8   63.26   51.37
  -4   6   8   39.23   45.65
   4   6  -8   31.98   37.80
  -4  -6   8   26.90   41.91
   4  -6  -8   36.70   42.30
  -4  -6   8   65.72   43.37
   4  -6  -8   22.52   24.80
   4   6  -7 1364.06  195.46
  -4   6   7 1166.76  239.76
   4   6  -7 1232.51  316.49
   4  -6  -7 1365.62  438.60
  -4  -6   7 1110.37  442.46
   4  -6  -7 1091.23  542.97
  -4  -6   7 1115.51  249.68
   4   6  -6 2071.04  244.11
  -4   6   6 1983.44  225.46
   4   6  -6 1933.63  324.40
   4  -6  -6 2393.32  266.35
   4  -6  -6 2052.63  407.26
  -4  -6   6 2092.18  292.61
  -4  -6   6 1921.20  308.06
  -4   6   5  677.44  322.01
  -4   6   5  597.26  384.20
   4   6  -5  730.23  300.09
   4   6  -5  653.95  253.34
   4  -6  -5  794.17  319.56
  -4  -6   5  447.37  265.14
  -4  -6   5  588.38  254.01
  -4  -6   5  629.50  331.75
   4  -6  -5  737.02  293.69
  -4   6   4 8652.24  611.64
   4   6  -4 9823.94  736.74
   4   6  -4 9435.73 1243.22
  -4   6   4 9155.58  702.55
   4   6  -4 8482.77  634.52
  -4  -6   4 8971.07  676.23
   4  -6  -4 9718.32  680.90
  -4  -6   4 9104.48  762.79
  -4  -6   4 9422.33  670.25
   4  -6  -4 8272.88  738.64
   4   6  -3  121.43   41.11
   4   6  -3  142.32   62.02
  -4   6   3  152.11   61.24
  -4   6   3  130.19   97.41
   4   6  -3   35.32   49.93
  -4  -6   3  138.74   48.97
   4  -6  -3  109.10   47.17
  -4  -6   3   65.66   98.48
   4  -6  -3  201.22   70.31
   4  -6  -3   96.44   74.45
  -4  -6   3  169.49  124.72
   4  -6  -3  122.69   43.07
   4   6  -2 6086.62  563.19
   4   6  -2 6155.27  598.09
  -4   6   2 6734.17  654.43
  -4   6   2 6098.32  825.92
   4   6  -2 6068.33  537.88
   4  -6  -2 6009.58  462.03
   4  -6  -2 6413.73  542.34
  -4  -6   2 6599.18  523.85
   4  -6  -2 6978.95  525.35
  -4  -6   2 6639.02  560.64
   4  -6  -2 6254.31  907.64
  -4  -6   2 6124.39  527.13
   4   6  -1  919.77  298.13
  -4   6   1  868.03  123.70
  -4   6   1  829.79  374.85
   4   6  -1  543.11  288.21
   4   6  -1  849.48  200.24
  -4  -6   1 1115.58  455.25
   4  -6  -1  798.81  345.55
  -4  -6   1  745.53  143.59
   4  -6  -1  907.96  105.31
   4  -6  -1  818.92  234.20
  -4  -6   1  768.52  211.83
   4  -6  -1  737.42   76.50
   4   6   0 7463.26  608.70
   4   6   0 5860.90  480.87
  -4   6   0 6915.96  543.09
   4   6   0 7393.21  593.69
  -4   6   0 7521.18  640.28
  -4  -6   0 7533.65  621.68
   4  -6   0 7477.65  617.50
  -4  -6   0 6833.71  583.17
   4  -6   0 7377.41  572.27
   4  -6   0 7859.47  602.31
  -4  -6   0 7179.14  566.88
   4  -6   0 6855.83  661.76
  -4   6  -1   16.11   23.49
  -4   6  -1   -0.89   52.19
   4   6   1    8.16   16.27
   4   6   1   16.07   20.82
   4   6   1   10.62   28.68
   4  -6   1    7.96   36.26
  -4  -6  -1    6.10   18.85
  -4  -6  -1   20.66   27.44
  -4  -6  -1   23.10   25.61
   4  -6   1   20.34   40.25
   4  -6   1   -2.42   54.65
   4  -6   1   33.50   43.46
   4   6   2  563.45  268.94
  -4   6  -2  567.19  224.61
   4   6   2  352.54  154.76
   4   6   2  530.92  194.28
  -4   6  -2  561.47  317.81
  -4  -6  -2  509.83  228.82
   4  -6   2  480.12  217.66
   4  -6   2  574.59  171.41
   4  -6   2  377.52  194.78
  -4  -6  -2  626.42  197.61
   4  -6   2  419.83  206.22
  -4  -6  -2  530.36  194.98
  -4   6  -3   17.13   36.22
   4   6   3   17.89   24.93
  -4   6  -3   36.07   40.87
   4   6   3    4.92   41.45
   4   6   3   42.28   29.28
  -4  -6  -3   11.01   17.50
   4  -6   3   41.94   53.94
   4  -6   3   28.37   27.72
   4  -6   3   14.16   49.33
  -4  -6  -3   26.38   23.23
  -4  -6  -3    0.00   30.28
   4  -6   3   20.12   29.10
   4   6   4 1508.76  173.49
   4   6   4 2413.60  231.45
  -4   6  -4 1699.56  260.17
  -4   6  -4 1559.06  587.83
   4   6   4 1704.66  180.45
  -4  -6  -4 1649.90  208.08
   4  -6   4 1479.42  278.64
  -4  -6  -4 1542.84  155.04
   4  -6   4 1586.09  170.88
   4  -6   4 1468.03  541.78
   4   6   5   37.36   30.11
   4   6   5   21.22   25.46
   4   6   5   13.15   17.96
  -4   6  -5   22.40   52.44
  -4   6  -5   37.22   28.14
   4  -6   5   32.27   26.07
   4  -6   5   28.69   49.75
  -4  -6  -5   18.99   25.76
  -4  -6  -5   12.23   11.00
   4  -6   5   61.07   47.40
  -4   6  -6  803.44  151.93
   4   6   6  857.98  195.13
   4   6   6  673.37   77.98
   4   6   6  741.77  287.69
  -4  -6  -6  793.58  270.21
  -4  -6  -6  822.56  139.67
   4  -6   6  838.41  318.21
   4  -6   6  829.91  232.59
   4   6   7  171.65   99.61
   4   6   7  127.81   58.82
   4   6   7  126.01   83.33
  -4   6  -7  161.35   45.30
  -4  -6  -7  188.56   86.05
   4  -6   7  130.44   56.74
  -4  -6  -7  112.79   55.70
   4  -6   7  260.60   89.20
   4   6   8 1226.41  240.61
   4   6   8 1358.55  167.50
   4   6   8 1301.34  329.61
  -4   6  -8  935.00  147.97
   4  -6   8 1269.47  210.77
   4  -6   8 1332.90  222.81
  -4  -6  -8 1222.67  171.45
   4   6   9   13.00   21.35
   4   6   9    5.68   22.22
   4   6   9    3.12   27.64
  -4   6  -9   10.97   24.12
   4  -6   9   43.29   39.71
   4  -6   9   34.92   31.00
  -4  -6  -9   -0.74   33.81
   4   6  10 2348.10  278.58
  -4   6 -10 5237.25  828.92
   4  -6  10 2148.80  306.05
   4  -6  10 2283.39  265.90
  -4  -6 -10 2336.12  199.08
  -4   6 -11   90.08   58.59
   4   6  11   36.56   41.97
   4  -6  11   98.37   81.95
   4  -6  11   90.44  113.33
   4   6  12 1420.01  266.18
  -4   6 -12 1312.25  270.96
   4  -6  12 1187.75  653.01
   4  -6  12 1201.96  453.08
   4   6  13  111.36   78.23
  -4   6 -13   99.03   34.99
   4  -6  13   97.34   87.82
   4  -6  14   64.13   95.35
   4  -7 -14  119.66   77.13
   4   7 -13 1362.75  345.65
   4  -7 -13 1080.12  899.36
  -4   7  12   34.68   45.53
   4   7 -12   34.04   21.34
   4  -7 -12   39.21   72.77
   4   7 -11  434.44  257.62
  -4   7  11  406.40  375.64
   4   7 -11  732.88  309.77
  -4  -7  11  560.04  467.36
   4  -7 -11  690.85  408.41
  -4   7  10  407.11  337.67
   4   7 -10  671.29  252.05
   4   7 -10  695.40  454.93
  -4  -7  10  516.16  492.25
   4  -7 -10  510.12  325.39
   4   7  -9  965.98  430.07
  -4   7   9 1122.56  279.95
   4   7  -9 1343.16  376.55
   4  -7  -9  831.23  481.15
  -4  -7   9 1220.20  378.10
   4   7  -8  156.02   68.98
  -4   7   8  109.47   52.06
   4   7  -8   55.23   43.49
  -4  -7   8  125.43   82.57
   4  -7  -8  206.58  113.82
   4   7  -7  364.14  180.41
  -4   7   7  243.97  184.92
   4   7  -7  332.61  199.68
  -4  -7   7  330.70  235.25
   4  -7  -7  357.47  211.61
   4   7  -6  850.35  428.53
  -4   7   6  917.96  216.63
   4   7  -6  981.55  360.02
  -4  -7   6  903.62  543.10
   4  -7  -6  855.22  400.05
   4   7  -5  879.53  298.29
   4   7  -5 1047.58  340.84
  -4   7   5  977.06  215.14
   4  -7  -5 1178.74  213.61
  -4  -7   5  985.48  468.07
   4  -7  -5 1083.02  476.00
   4   7  -4  469.08  192.59
   4   7  -4  406.42  181.71
  -4   7   4  348.38   68.93
  -4  -7   4  485.07  302.10
   4  -7  -4  270.85  153.99
  -4  -7   4  283.43  154.69
   4  -7  -4  316.53  149.79
   4   7  -3 3725.33  410.63
  -4   7   3 3459.21  523.12
   4   7  -3 3738.31  399.33
  -4  -7   3 3737.26  518.67
   4  -7  -3 4169.99  435.97
   4  -7  -3 3444.13  415.19
   4  -7  -3 4072.62  385.71
  -4  -7   3 3701.70  625.01
  -4   7   2  126.28   41.93
   4   7  -2  119.19   73.50
   4   7  -2  144.90   49.31
  -4  -7   2   90.54   59.24
   4  -7  -2  149.61   80.14
   4  -7  -2  105.32   64.32
   4  -7  -2   85.47   41.97
   4  -7  -2   84.14   59.59
  -4  -7   2  137.32   46.74
   4   7  -1 1809.68  452.81
  -4   7   1 1628.33  270.45
   4   7  -1 1995.96  488.99
   4   7  -1 1990.30  395.97
   4  -7  -1 2191.83  250.51
  -4  -7   1 1750.15  241.49
  -4  -7   1 1988.93  426.99
   4  -7  -1 1804.41  388.77
   4  -7  -1 1834.22  206.22
   4   7   0  175.29   77.55
  -4   7   0  249.30  125.34
   4   7   0  178.08   91.75
   4   7   0  195.01  141.83
  -4  -7   0  177.19   87.81
  -4  -7   0  261.82  102.41
   4  -7   0  166.75   74.11
   4  -7   0  175.04   78.47
   4  -7   0  156.29  102.35
   4   7   1 5208.90  557.75
   4   7   1 4173.09  439.25
   4   7   1 4595.67  487.42
  -4   7  -1 4633.61  478.23
  -4  -7  -1 4243.49  466.67
   4  -7   1 3693.07  438.79
   4  -7   1 4561.40  479.06
   4  -7   1 4816.71  584.29
  -4  -7  -1 5700.09  609.35
   4   7   2    6.78   47.24
   4   7   2   34.06   35.78
   4   7   2   -5.00   48.67
  -4   7  -2   17.14   31.22
   4  -7   2  -23.67   56.74
  -4  -7  -2   22.34   34.25
   4  -7   2   26.07   24.88
   4  -7   2   35.55   29.16
  -4  -7  -2   14.15   34.60
   4   7   3 3139.87  324.44
  -4   7  -3 3439.71  430.05
   4   7   3 3572.07  403.53
   4   7   3 3057.16  348.90
  -4  -7  -3 3368.97  357.04
   4  -7   3 2871.61  324.49
   4  -7   3 3055.75  827.67
   4  -7   3 2830.59  441.58
  -4  -7  -3 2641.64  312.04
  -4   7  -4  109.53   40.73
   4   7   4   99.92   56.12
   4   7   4   72.42   45.71
   4   7   4   85.92   45.36
   4  -7   4   64.99   40.72
   4  -7   4   86.92   67.86
   4  -7   4   59.89   64.41
  -4  -7  -4  107.22   66.91
  -4  -7  -4   89.86   37.87
   4   7   5  737.00  391.58
   4   7   5  618.94   91.94
  -4   7  -5  741.04  338.91
   4   7   5  735.50  157.73
   4  -7   5  633.30  386.39
  -4  -7  -5  745.35  301.18
   4  -7   5  723.00  358.91
   4   7   6   -8.78   57.02
  -4   7  -6    7.38   17.74
   4   7   6   62.12   80.49
   4   7   6   20.61   15.19
  -4  -7  -6   -4.21   43.52
   4  -7   6   15.89   39.01
  -4  -7  -6   -0.79   11.77
   4  -7   6   -7.67   65.60
  -4   7  -7 2204.91  377.12
   4   7   7 3184.95  599.99
   4   7   7 2557.88  415.73
   4   7   7 2579.43  462.31
  -4  -7  -7 3035.83  539.45
   4  -7   7 2661.81  633.30
   4  -7   7 2601.85  462.58
   4   7   8   19.37   53.13
  -4   7  -8   -6.85   30.39
   4  -7   8   47.36   53.81
   4  -7   8  -18.35   61.35
  -4  -7  -8   -3.13   42.78
  -4   7  -9  727.06  173.62
   4   7   9  742.17  340.43
   4  -7   9  680.83  388.42
  -4  -7  -9  616.63  417.09
   4  -7   9  689.30  346.07
   4   7  10   25.38   38.72
  -4   7 -10   -9.66   56.51
   4  -7  10   -6.89   39.35
   4  -7  10    4.81   37.58
   4   7  11  496.19  458.11
  -4   7 -11 3904.55 2082.14
   4  -7  11  562.46  647.29
   4  -7  11  779.68  456.16
   4   7  12   39.39   37.01
   4  -7  12    0.87   52.24
   4  -7  13   39.67   62.45
   4   8 -12   -0.60   43.59
   4  -8 -12   54.79   50.93
   4   8 -11   20.71   30.10
  -4   8  11   -3.88   56.19
   4  -8 -11  -20.47  108.69
  -4   8  10  314.51  311.76
   4   8 -10  403.69  286.81
   4   8 -10  595.15  286.95
   4  -8 -10  643.54  265.77
  -4  -8  10  404.79  372.52
  -4   8   9   35.65   44.24
   4   8  -9    4.20   48.94
   4   8  -9  -22.69   73.55
   4  -8  -9   -8.40   55.85
  -4  -8   9  -22.18  105.64
  -4   8   8  798.24  258.26
   4   8  -8  627.10  318.27
   4   8  -8 1088.73  276.75
  -4  -8   8  614.33  514.00
   4  -8  -8  723.65  486.81
   4   8  -7   47.86   62.57
  -4   8   7   49.27   54.07
   4   8  -7   15.07   36.03
  -4  -8   7   27.94   46.10
   4  -8  -7   64.26   45.84
  -4   8   6 1370.60  304.88
   4   8  -6 1118.74  353.60
   4   8  -6 1553.18  320.37
   4  -8  -6 1447.52  701.00
  -4  -8   6 1623.26  528.60
   4   8  -5  230.97  124.33
   4   8  -5  243.71  167.06
  -4   8   5  177.45   83.17
  -4  -8   5  150.27   93.04
   4  -8  -5  183.33  117.51
   4   8  -4  314.85  220.95
   4   8  -4  341.74  197.86
  -4   8   4  285.18  183.31
  -4  -8   4  264.13  181.85
   4  -8  -4  301.04  159.82
   4   8  -3   24.83   32.02
   4   8  -3   35.85   47.78
  -4   8   3   18.94   27.11
   4  -8  -3   34.44   51.41
  -4  -8   3   39.69   55.79
  -4  -8   3   55.05   57.05
   4   8  -2 1085.09  357.15
  -4   8   2  873.37  175.54
   4   8  -2  745.93  373.24
  -4  -8   2  849.12  430.96
   4  -8  -2  924.50  578.80
   4  -8  -2   10.27   16.74
   4  -8  -2  754.97  138.03
  -4  -8   2  959.37  475.25
   4   8  -1   44.77   62.68
   4   8  -1   38.13   32.02
  -4   8   1   23.30   40.31
   4  -8  -1   32.35   18.84
  -4  -8   1   34.56   64.35
   4  -8  -1    2.39   11.74
   4  -8  -1   70.50   57.57
  -4  -8   1   10.15   36.57
   4   8   0  361.24  164.38
  -4   8   0  462.65  174.45
   4   8   0  485.76  259.26
   4  -8   0  504.91  292.74
  -4  -8   0  529.30  257.24
  -4  -8   0  559.84  175.67
   4  -8   0  463.54  202.14
   4  -8   0   -0.55   38.20
   4   8   1   11.34   22.97
  -4   8  -1   40.04   40.66
   4   8   1   10.63   26.32
  -4  -8  -1    4.00   34.55
   4  -8   1   -1.23   47.77
  -4  -8  -1   -3.36   28.49
   4  -8   1   -7.78   32.31
   4  -8   1   30.57   44.89
   4   8   2  831.70  391.78
  -4   8  -2 1030.59  188.67
   4  -8   2  803.11  445.06
   4  -8   2  931.37  427.45
  -4  -8  -2   15.85   30.10
  -4  -8  -2  978.08  423.25
   4  -8   2  638.67  330.09
   4   8   3   78.26   59.21
   4   8   3  115.73   79.71
  -4   8  -3  103.07   84.52
  -4  -8  -3   16.78   20.88
   4  -8   3  103.47   61.51
  -4  -8  -3  109.87   73.68
   4  -8   3   86.84   58.81
   4  -8   3   83.41   88.27
   4   8   4  231.86  135.33
  -4   8  -4  224.62  117.68
   4   8   4  154.23  137.75
   4  -8   4  265.37  142.05
  -4  -8  -4  304.62  157.80
   4  -8   4  140.60   87.80
  -4  -8  -4   -5.70   19.41
  -4   8  -5   30.64   21.57
   4   8   5   32.59   65.00
   4   8   5   13.51   41.76
   4   8   5   41.17   20.49
   4  -8   5   27.93   36.97
  -4  -8  -5   36.78   51.44
   4  -8   5    5.70   44.75
  -4   8  -6  869.35  225.09
   4   8   6  921.78  583.78
   4  -8   6  917.47  508.20
   4  -8   6  780.82  403.24
  -4  -8  -6  869.87  489.81
  -4   8  -7   27.71   36.88
   4   8   7   69.36   42.79
  -4  -8  -7   31.05   45.46
   4  -8   7   45.37   54.14
   4  -8   7    7.59   29.54
   4   8   8  638.58  483.35
  -4   8  -8  552.29  291.25
   4  -8   8  689.37  468.79
  -4  -8  -8  923.62  214.40
   4  -8   8  773.56  379.81
   4   8   9   -9.03   72.68
  -4   8  -9   43.84   42.12
   4  -8   9   30.36   37.00
   4  -8   9   64.44   63.88
   4   8  10  295.99  199.65
   4  -8  10  420.38  260.27
   4  -8  10  292.58  348.84
   4  -8  11   14.52   40.22
   4   9 -10   23.45   40.35
  -4   9  10   29.04   30.00
   4  -9 -10   51.28   97.13
   4   9  -9   32.43   49.89
   4  -9  -9  148.03   63.60
  -4  -9   9   27.56   36.58
  -4   9   8   13.10   47.22
   4   9  -8    8.75   27.23
   4   9  -8   32.01   39.01
   4  -9  -8   -9.42  109.87
   4   9  -7  597.38  353.15
   4   9  -7  514.43  275.45
  -4   9   7  338.87  338.65
   4  -9  -7  572.44  312.33
  -4  -9   7  576.30  403.88
   4   9  -6   39.20   41.69
  -4   9   6   61.76   44.48
   4   9  -6   68.14   42.44
  -4  -9   6  145.83  103.93
   4  -9  -6  108.38  108.60
   4   9  -5  163.48   73.30
  -4   9   5   93.94   48.96
   4   9  -5  129.14   59.15
  -4  -9   5  143.44  150.07
   4  -9  -5  144.87   82.21
   4   9  -4   -4.62   58.84
   4   9  -4   18.71   38.09
  -4   9   4   13.25   33.77
   4  -9  -4   17.77   49.82
  -4  -9   4   21.02   53.00
   4   9  -3  229.79  162.48
   4   9  -3  173.23  111.90
  -4   9   3  271.98  140.25
   4  -9  -3  280.00  147.82
  -4  -9   3  215.83  201.61
   4   9  -2   48.15   44.28
   4   9  -2   60.01   56.53
  -4   9   2   59.12   58.09
  -4  -9   2   51.60   57.56
   4  -9  -2   49.31   67.58
  -4  -9   2   32.73   60.90
   4   9  -1  255.26  233.58
   4   9  -1  461.00  215.38
  -4   9   1  289.02  217.15
  -4  -9   1  426.74  217.07
   4  -9  -1  362.35  181.97
   4  -9  -1  312.86  118.52
  -4   9   0  -14.53   49.15
   4   9   0   43.54   47.98
   4   9   0   16.53   22.32
   4  -9   0   -4.48   27.81
   4  -9   0   45.03   75.77
  -4  -9   0   32.05   69.48
   4   9   1   97.65   57.55
   4   9   1  146.29  128.25
  -4   9  -1  171.55  112.80
  -4  -9  -1  207.12   92.09
   4  -9   1  209.72  176.72
   4  -9   1  251.00  124.41
   4   9   2   22.97   35.39
   4   9   2   52.62   62.37
  -4   9  -2   93.02   58.27
   4  -9   2   71.86   63.99
  -4  -9  -2   78.30   43.51
   4  -9   2   84.83   78.45
  -4   9  -3  323.38  199.75
   4   9   3  325.39  187.00
  -4  -9  -3  502.02  235.64
   4  -9   3  287.88  269.79
   4  -9   3  236.04  213.38
  -4   9  -4   89.93   84.16
   4   9   4   87.58   45.96
  -4  -9  -4   47.15   69.87
   4  -9   4   42.93   88.26
   4  -9   4   92.25   74.85
  -4   9  -5  899.74  234.89
   4   9   5  605.07  436.99
  -4  -9  -5  948.71  533.75
   4  -9   5  634.74  415.18
   4  -9   5  650.16  592.81
  -4   9  -6   17.02   24.43
   4   9   6   44.25   50.51
  -4  -9  -6   60.31   49.19
   4  -9   6   36.30   56.51
   4  -9   6   35.43   60.41
  -4   9  -7  218.34  156.43
   4   9   7  284.27  176.15
   4  -9   7  476.93  188.43
   4  -9   7  375.56  335.22
  -4  -9  -7  452.79  248.68
   4  -9   8   50.92   54.37
   4  -9   8   42.24   43.34
   4  -9   9   73.41   57.22
  -4  10   8  339.91  197.35
  -4  10   7   26.74   44.94
  -4 -10   7   -1.23   62.15
  -4  10   6  226.80  178.62
   4  10  -6  193.57  133.38
   4 -10  -6  384.12  175.22
  -4 -10   6  300.94  216.55
   4  10  -5   36.02   82.56
   4  10  -5   80.19   66.20
  -4  10   5   44.35   54.29
   4 -10  -5   13.72   89.72
   4  10  -4  136.87  202.68
   4  10  -4  184.91  116.53
  -4  10   4  131.72  130.20
  -4 -10   4  209.01  233.17
   4 -10  -4  171.88  175.31
   4  10  -3    1.35   30.42
   4  10  -3   16.80   70.89
  -4  10   3   25.80   41.31
   4 -10  -3   38.99   58.12
  -4 -10   3   -0.87   90.51
  -4  10   2  196.13  116.61
   4  10  -2  112.66  194.83
   4  10  -2  270.45  152.28
  -4 -10   2  240.86  158.12
   4 -10  -2  309.48  205.90
   4  10  -1   23.95   32.03
   4  10  -1   60.00   55.73
  -4  10   1    1.04   55.77
   4 -10  -1  -41.02   93.48
  -4 -10   1   58.09   76.08
  -4  10   0  159.88  123.39
   4  10   0  196.86  109.07
   4 -10   0  240.49  152.12
  -4 -10   0  293.48  209.87
   4  10   1   83.32   89.35
  -4  10  -1   96.54   60.03
  -4 -10  -1  142.97  105.78
   4 -10   1   94.85  101.60
  -4  10  -2  445.17  250.30
   4  10   2  342.04  233.07
  -4 -10  -2  290.24  242.44
   4 -10   2  430.03  388.77
  -4  10  -3   79.51   73.53
   4  10   3   60.46   65.26
   4 -10   3   32.54   40.16
   4 -10   3   39.61   68.94
  -4 -10  -3   15.01   46.63
   4 -10   4  339.11  284.09
  -4 -10  -4  365.12  228.47
  -4 -10  -5   17.06   53.28
   4 -10   5   20.88   40.47
  -4 -10  -6   96.53  255.46
   4 -10   6  194.38  221.17
   4 -10   7    1.36   39.28
   4 -10   8   12.79   38.56
  -4 -11  -1  715.85  670.13
  -4 -11  -2   27.11   47.69
  -4 -11  -3  203.53  133.80
  -4 -11  -4   -4.88   71.58
  -4 -11  -5  261.59  219.21
  -5   0  17  -20.73   87.07
  -5   0  17   -7.50   49.06
  -5   0  16  108.90  145.19
  -5   0  16  181.52  128.90
  -5   0  15    1.24   44.31
  -5   0  15  -16.26   55.22
  -5   0  14 4235.40  348.78
   5   0 -14 3613.35  604.82
   5   0 -13   24.89   33.26
  -5   0  13   -2.84   16.57
  -5   0  13   46.62   87.71
  -5   0  12  208.92   97.75
   5   0 -12  332.15  145.14
  -5   0  12  271.00  116.00
  -5   0  12  274.21   68.34
  -5   0  11    8.26   11.25
  -5   0  11    3.70    9.17
  -5   0  11    3.31   53.53
  -5   0  11   25.98   44.97
   5   0 -11   45.29   30.16
  -5   0  10 2406.16  252.27
  -5   0  10 2205.70  646.66
   5   0 -10 2915.00  211.28
  -5   0  10 2793.48   88.64
  -5   0  10 2968.06   98.28
  -5   0  10 2935.42  225.66
  -5   0   9    0.72   22.40
   5   0  -9   11.93   34.26
  -5   0   9    1.06    6.62
  -5   0   9    7.63   35.16
  -5   0   9   -0.11   36.60
  -5   0   9   -1.25    8.55
   5   0  -8   40.70   30.62
  -5   0   8    8.02   30.00
  -5   0   8   14.78    6.22
  -5   0   8   19.67   32.69
  -5   0   8    9.84   30.74
  -5   0   8   16.06    6.85
  -5   0   7   37.09   53.04
   5   0  -7   -1.51   38.89
  -5   0   7   16.22   14.19
  -5   0   7   19.47   42.22
  -5   0   6 3894.47  340.87
  -5   0   6 4018.61  346.41
   5   0  -6 3081.68  263.35
  -5   0   6 3701.30  454.48
  -5   0   5   25.26   30.57
  -5   0   5    7.65   33.79
  -5   0   5   28.75   54.53
   5   0  -5   16.12   27.59
  -5   0   4 5468.51  337.89
  -5   0   4 4953.37  357.88
  -5   0   4 5434.19  349.83
   5   0  -4 3642.67  234.92
   5   0  -3    5.88    5.84
  -5   0   3   -3.94   41.54
  -5   0   3   27.06   43.78
   5   0  -3   25.95   32.40
   5   0  -2 2052.84  114.36
   5   0  -2 1489.77   78.06
  -5   0   2 2020.25  184.06
   5   0  -2 2151.64  175.31
  -5   0   2 1892.51  164.72
   5   0  -2 2046.82  176.24
   5   0  -1   23.03   35.28
  -5   0   1    3.42   27.27
  -5   0   1    1.55    8.19
  -5   0   1   -0.65   14.86
   5   0  -1   13.33   45.83
   5   0  -1    1.72    6.92
  -5   0   0  491.95   38.91
  -5   0   0  455.93   59.49
   5   0   0  528.00  192.44
   5   0   0  463.11  251.23
   5   0   0  338.86   29.67
  -5   0   0  510.29   80.55
   5   0   1    7.15   34.49
  -5   0  -1   -0.90   16.33
  -5   0  -1   12.28   11.44
  -5   0  -1  -13.18   33.28
   5   0   1    8.37   17.44
   5   0   1    1.42    8.31
  -5   0  -210775.41  535.77
   5   0   2 9799.32  490.75
  -5   0  -210631.95  567.42
   5   0   2 7895.80  390.46
   5   0   2 9981.34  549.99
   5   0   3    9.77   12.56
   5   0   3    7.36   11.16
  -5   0  -3    4.36   10.22
  -5   0  -3    6.32   20.64
   5   0   3   14.50   29.76
  -5   0  -3    5.04   30.18
   5   0   4 6778.31  341.90
   5   0   4 7863.92  379.19
   5   0   4 8024.10  468.63
  -5   0  -4 8579.74  496.73
  -5   0  -410844.96  566.21
   5   0   5   -1.04   36.05
   5   0   5   14.63   22.41
   5   0   5    0.46    6.60
  -5   0  -5   12.43   32.25
  -5   0  -5   -5.13   33.25
   5   0   6  407.99   79.30
   5   0   6  278.77  129.01
  -5   0  -6  422.29   66.17
  -5   0  -6  356.52   81.40
   5   0   6  439.08  146.71
   5   0   7    6.33   11.02
   5   0   7    5.05    9.74
  -5   0  -7    4.48   19.25
   5   0   7    0.55   14.87
  -5   0  -7   12.37   19.18
   5   0   7    3.09   30.52
   5   0   8 2975.51  366.02
   5   0   8  869.44  136.80
  -5   0  -8 1156.34  139.08
   5   0   8 1018.89  442.45
   5   0   8 1041.27  100.52
  -5   0  -8  981.73  328.23
  -5   0  -9   11.62   36.93
   5   0   9    3.33    8.72
  -5   0  -9   16.39   29.36
   5   0   9   41.14   44.95
   5   0   9   -1.19   13.57
   5   0   9   15.43   28.22
   5   0  10 4654.83  465.14
   5   0  10 4906.76  475.64
   5   0  10 4629.51  608.61
  -5   0 -10 4559.71  460.20
   5   0  10 4164.64  446.38
   5   0  11   -2.01   20.36
  -5   0 -11    9.05   32.72
   5   0  11    9.47   21.83
   5   0  11   22.71   35.34
   5   0  12  117.32  130.16
   5   0  12   94.18  104.73
   5   0  12   57.58   50.89
  -5   0 -12  174.34   77.63
   5   0  13    8.67   44.17
  -5   0 -13   18.46   16.51
   5   0  14   42.78   35.24
   5   0  14   14.65   25.86
   5   0  15   19.23   38.57
   5   0  15   60.36   66.15
   5   0  16  235.45  122.13
   5   0  16  184.33  158.95
  -5   1  17  403.14  456.42
  -5   1  16  162.88  275.07
  -5   1  16  124.24  168.18
  -5  -1  16  190.09  205.55
  -5  -1  16  177.99  200.26
  -5   1  15  592.06  162.82
  -5   1  15  307.99  285.94
  -5  -1  15  242.09  252.26
  -5  -1  15  398.52  330.72
  -5   1  14   89.90   71.95
   5   1 -14   26.83   36.09
  -5   1  14   27.67   47.51
  -5  -1  14   53.95   62.29
  -5   1  13 1352.94  563.96
  -5   1  13 1676.07  121.65
   5   1 -13 1655.15  278.79
   5  -1 -13 1579.65  397.46
  -5  -1  13 1523.90  615.02
  -5  -1  13 1868.88  135.01
  -5   1  12  169.55  115.96
  -5   1  12  244.25  124.81
  -5   1  12  187.50  125.21
   5   1 -12  327.68  172.96
  -5  -1  12  252.42  124.88
  -5  -1  12  243.22  148.53
   5  -1 -12  344.64  169.09
  -5  -1  12  328.97  305.50
  -5   1  11 1154.92  143.60
  -5   1  11 1287.65  162.65
  -5   1  11  770.80  549.32
   5   1 -11  972.40   57.59
  -5   1  11 1075.68  208.17
   5   1 -11 1203.83  580.45
   5  -1 -11 1230.57  348.65
  -5  -1  11 1233.76  355.41
  -5  -1  11 1162.61  209.95
  -5   1  10  255.85  137.83
  -5   1  10  253.48  202.98
  -5   1  10  297.96   62.62
   5   1 -10  285.76   69.15
  -5   1  10  301.72   76.86
  -5   1  10  331.66  120.45
   5   1 -10  276.84   93.25
  -5  -1  10  267.53  108.44
  -5  -1  10  233.71  172.74
  -5  -1  10  369.20  213.40
  -5  -1  10  329.27  102.01
   5  -1 -10  351.59  140.10
  -5   1   9 2169.84  236.84
  -5   1   9 1982.93  409.01
  -5   1   9 1675.43  785.11
   5   1  -9 1835.43  210.38
  -5   1   9 2310.39  178.41
   5   1  -9 2284.38  179.73
  -5   1   9 1928.98  152.55
  -5  -1   9 2188.99  177.34
   5  -1  -9 2248.16  228.05
  -5  -1   9 1877.96  366.85
  -5  -1   9 1700.92  329.18
  -5  -1   9 2086.24  681.86
   5   1  -8    8.46   11.33
  -5   1   8   41.09   49.77
  -5   1   8   19.12   11.49
  -5   1   8   -7.65   60.32
  -5   1   8   15.86   36.46
  -5   1   8   11.46   10.54
   5   1  -8   -2.20   33.51
  -5  -1   8   -0.88   59.01
  -5  -1   8    7.51   15.82
  -5  -1   8    8.18   33.58
  -5  -1   8   31.60   28.24
   5  -1  -8   47.22   30.15
  -5   1   7 4584.06  391.18
  -5   1   7 5124.39  355.46
   5   1  -7 4183.84  358.89
  -5   1   7 4607.39  398.06
   5   1  -7 3439.41  243.96
  -5   1   7 4868.64  506.84
  -5  -1   7 4691.01  337.03
  -5  -1   7 4065.60  358.63
  -5  -1   7 4422.23  430.49
  -5  -1   7 4876.93  607.45
   5  -1  -7 3903.73  325.05
   5   1  -6 5577.90  388.72
  -5   1   6 4020.72  383.84
   5   1  -6 3003.10  263.73
  -5   1   6 4105.88  370.71
  -5  -1   6 3686.00  260.80
  -5  -1   6 3737.33  335.97
  -5  -1   6 4186.41  376.88
  -5  -1   6 3651.41  324.79
   5  -1  -6 4230.49  422.27
   5  -1  -6 2787.33  234.28
  -5   1   5 1350.35  133.34
   5   1  -5  891.97   89.66
   5   1  -5 1102.57   35.46
  -5   1   5 1376.61  144.65
  -5  -1   5 1184.97   67.17
   5  -1  -5 1178.40  131.15
  -5  -1   5 1251.61  503.37
   5  -1  -5 2488.05  345.59
  -5  -1   5 1144.07  120.42
  -5  -1   5 1115.49  344.78
   5   1  -4 8260.39  390.31
   5   1  -410602.54  598.16
  -5   1   4 9367.06  528.47
  -5   1   4 9284.87  516.87
  -5   1   4 8136.22  371.15
   5  -1  -4 8777.49  500.11
  -5  -1   4 9193.96  541.09
  -5  -1   4 8781.54  487.85
  -5  -1   410506.45  588.61
   5  -1  -4 7414.82  405.95
  -5  -1   4 8688.36  410.25
  -5   1   3 4748.20  306.54
   5   1  -3 4344.03  220.91
  -5   1   3 4562.50  292.13
   5   1  -3 3661.31  242.60
  -5   1   3 3222.98  154.34
  -5  -1   3 4722.84  363.89
  -5  -1   3 4320.85  268.90
  -5  -1   3 4125.68  203.07
   5  -1  -3 4233.56  289.98
  -5  -1   3 5021.11  318.87
   5  -1  -3 4309.29  275.14
   5   1  -2   25.69   10.09
  -5   1   2   79.36   66.72
  -5   1   2   20.20   35.06
  -5   1   2   13.65    5.90
   5   1  -2   19.77   40.32
   5  -1  -2   39.74   31.81
  -5  -1   2   34.27   12.14
  -5  -1   2   16.22   26.45
  -5  -1   2   32.38   28.41
   5  -1  -2   32.26   50.68
   5  -1  -2    8.38   17.52
  -5  -1   2   21.99   28.73
  -5   1   1  951.40   97.65
   5   1  -1 1093.84  313.64
  -5   1   1  673.61   31.32
   5   1  -1  857.91   41.59
  -5   1   1 1195.30  229.82
   5   1  -1  961.01   67.87
   5  -1  -1  918.93  104.51
  -5  -1   1 1103.09  150.57
   5  -1  -1 1035.09  111.83
  -5  -1   1 1007.29  113.70
  -5  -1   1  917.03  103.01
   5  -1  -1 1063.49   77.95
   5   1   0  811.96   82.36
  -5   1   0  543.78   31.23
   5   1   0  809.13   47.99
   5   1   0  663.07   85.68
  -5   1   0  853.18  151.62
  -5   1   0  758.27   91.12
   5  -1   0  648.92   37.09
   5  -1   0  767.91  138.17
  -5  -1   0  770.46   89.72
  -5  -1   0  894.44  155.76
   5  -1   0  687.37   99.28
  -5  -1   0  775.66   97.07
  -5   1  -1  388.13  173.75
   5   1   1  271.05   49.76
   5   1   1  297.32  151.65
  -5   1  -1  388.28  170.22
   5   1   1  414.92  122.32
  -5   1  -1  294.10   89.98
  -5  -1  -1  277.90   46.47
   5  -1   1  356.45  129.58
  -5  -1  -1  295.89   77.12
   5  -1   1  394.72  169.96
   5  -1   1  229.32   31.56
  -5  -1  -1  306.79  159.23
  -5   1  -2 4756.28  245.78
  -5   1  -2 6580.25  352.63
   5   1   2 6237.49  380.96
   5   1   2 6459.43  344.14
  -5   1  -2 6510.32  373.44
   5   1   2 7460.06  387.15
  -5  -1  -2 5655.46  290.46
   5  -1   2 6426.98  381.74
  -5  -1  -2 6413.16  327.32
   5  -1   2 4915.99  253.25
   5  -1   2 5716.88  315.56
  -5  -1  -2 6215.10  365.74
   5   1   3 6818.25  403.00
   5   1   3 7317.94  374.59
  -5   1  -3 5348.50  279.39
   5   1   3 6990.06  370.36
  -5   1  -3 6561.54  341.18
  -5   1  -3 7138.62  396.35
  -5  -1  -3 6974.58  326.75
  -5  -1  -3 6699.64  403.42
   5  -1   3 6524.49  378.46
   5  -1   3 5506.02  284.12
   5  -1   3 6715.51  350.70
  -5   1  -4 1083.22  161.34
   5   1   4  922.78  117.04
  -5   1  -4  727.86   60.68
  -5   1  -4  952.54  130.09
   5   1   4  976.65   78.38
   5  -1   4  917.22  127.05
  -5  -1  -4  959.64  100.63
   5  -1   4  865.54   66.20
  -5  -1  -4  840.82   70.73
   5  -1   4  867.23   96.43
   5   1   5  935.67   79.20
  -5   1  -5 1004.29  198.95
  -5   1  -5  789.07   61.82
   5   1   5  871.53   97.32
  -5   1  -5 1192.47  186.08
  -5  -1  -5  890.32  132.32
   5  -1   5  898.90  103.92
   5  -1   5  998.62  366.79
  -5  -1  -5 1118.24  288.85
   5  -1   5  868.66   68.61
   5   1   6 1871.39  159.79
  -5   1  -6 2173.02  212.39
  -5   1  -6 2147.29  178.67
   5   1   6 2393.73  447.69
  -5   1  -6 2048.35  234.25
  -5  -1  -6 2258.91  236.19
  -5  -1  -6 1945.08  181.51
   5  -1   6 1986.11  171.78
   5  -1   6 1848.61  215.18
   5  -1   6 2012.96  172.95
  -5   1  -7 3813.13  272.88
  -5   1  -7 3254.36  241.46
  -5   1  -7 3779.31  299.28
   5   1   7 3141.61  266.84
   5   1   7 2763.17  231.91
   5  -1   7 3565.87  363.25
  -5  -1  -7 3441.34  267.05
   5  -1   7 2847.30  213.20
   5  -1   7 3465.47  249.66
  -5  -1  -7 2611.84  223.95
  -5   1  -8   91.90   31.78
   5   1   8  105.96   61.38
   5   1   8   56.49   23.80
  -5   1  -8  100.07   33.09
  -5   1  -8  122.03   56.04
   5  -1   8   55.76   56.15
   5  -1   8  103.50   28.05
   5  -1   8   63.71   31.37
  -5  -1  -8   81.78   73.17
   5   1   9 3458.23  260.02
  -5   1  -9 4989.24  555.34
   5   1   9 4181.59  421.15
  -5   1  -9 4176.92  328.82
   5   1   9 4508.56  388.60
   5  -1   9 3893.05  332.72
   5  -1   9 4256.88  322.40
  -5  -1  -9 4076.60  423.58
   5  -1   9 4576.16  540.70
   5  -1   9 3514.83  266.92
  -5   1 -10   53.89   42.50
  -5   1 -10    8.16   27.02
   5   1  10   20.05   28.24
   5   1  10    5.80    9.17
   5   1  10   19.43   21.61
   5   1  10   39.87   44.02
   5   1  10   10.32   10.47
   5  -1  10   -4.56   48.03
   5  -1  10   18.35   21.42
   5   1  11  483.26   66.82
   5   1  11  442.37  245.56
   5   1  11  538.22   52.68
   5   1  11  483.45  198.14
  -5   1 -11  552.13  154.69
   5  -1  11  479.51  251.68
   5  -1  11  445.86  134.94
   5  -1  11  534.32  290.99
   5   1  12  446.67  276.58
  -5   1 -12  501.46  205.05
   5   1  12  269.78  114.36
   5   1  12  329.82  108.37
   5   1  12  339.08  162.49
   5  -1  12  224.41  269.36
   5  -1  12  382.52  205.18
   5  -1  12  299.05  140.85
   5   1  13   89.69   78.41
   5   1  13   63.61   54.80
  -5   1 -13  144.52   70.07
   5  -1  13   79.88   52.20
   5  -1  13  103.33   71.23
  -5   1 -14  204.36  159.53
   5   1  14  163.12  230.86
   5   1  14  180.17   69.28
   5  -1  14  350.39  156.22
  -5   1 -15   44.10   49.07
   5   1  15   48.95   74.62
   5   1  15   26.48   59.03
   5  -1  15    6.40   66.69
   5   1  16   11.00   45.01
  -5   2  16  242.49  445.76
  -5  -2  16  302.28  209.84
  -5   2  15   16.50   56.33
  -5   2  15   70.90   83.38
  -5  -2  15   63.60   74.31
  -5   2  14   38.12   31.14
   5   2 -14   27.68   31.76
  -5   2  14   62.98   65.04
  -5  -2  14   87.58   47.95
  -5   2  13   90.09   91.34
  -5   2  13   48.67   51.34
   5   2 -13   95.06   39.57
  -5   2  13   80.48   44.15
  -5   2  13   14.39   29.08
   5   2 -13   81.49   51.34
  -5  -2  13  164.45   86.61
  -5   2  12 3202.74  363.41
  -5   2  12 3104.43  267.91
   5   2 -12 3322.61  584.16
   5   2 -12 4115.28  377.10
  -5   2  12 3361.94  301.60
  -5   2  12 3633.50  403.32
  -5  -2  12 3607.67  343.12
   5  -2 -12 2902.15  299.71
  -5  -2  12 2914.95  375.50
   5   2 -11 4015.19  464.89
   5   2 -11 4182.61  538.50
  -5   2  11 3932.62  453.40
  -5   2  11 4213.35  538.49
  -5   2  11 3097.83  354.24
  -5   2  11 4004.26  519.08
   5  -2 -11 3816.72  479.32
  -5  -2  11 4519.21  530.87
  -5  -2  11 3877.90  532.93
  -5   2  10 1602.12  237.42
   5   2 -10 1667.52  329.49
  -5   2  10 1298.53  267.95
  -5   2  10 1497.87  245.52
  -5   2  10 1754.84  175.94
   5   2 -10 1158.89  119.82
  -5   2  10 1442.26  155.11
  -5  -2  10 1541.56  211.24
  -5  -2  10 1266.81  459.56
   5  -2 -10 1537.29  262.26
  -5   2   9   64.75   68.48
  -5   2   9   74.14   40.64
  -5   2   9   61.64   43.58
  -5   2   9   77.39   34.63
   5   2  -9  115.52   49.57
   5   2  -9   74.10   25.38
   5  -2  -9  150.99   59.54
  -5  -2   9   93.43   47.05
  -5  -2   9  114.83   44.67
  -5  -2   9   48.26   43.23
  -5   2   8 4664.70  773.70
  -5   2   8 3407.74  263.73
  -5   2   8 4442.06  501.62
   5   2  -8 4525.64  422.26
  -5   2   8 4348.48  342.80
   5   2  -8 4233.99  401.37
   5  -2  -8 4631.00  464.00
   5  -2  -8 4195.78  374.85
  -5  -2   8 4041.66  386.58
  -5  -2   8 3492.31  382.00
  -5  -2   8 4577.03  371.58
  -5   2   7  151.05   50.61
   5   2  -7  165.36   58.67
  -5   2   7  194.68   43.93
  -5   2   7  117.51   62.74
   5   2  -7  149.37   79.35
  -5   2   7  164.62   64.94
   5   2  -7  126.07   43.87
  -5  -2   7   95.80   56.54
  -5  -2   7  154.32   66.64
   5  -2  -7  183.08   74.89
   5  -2  -7  153.53   51.83
  -5  -2   7  121.29   44.68
  -5   2   6 2411.92  383.26
   5   2  -6 1841.77  192.73
  -5   2   6 2261.92  173.06
   5   2  -6 2341.70  629.23
  -5   2   6 2327.69  426.17
   5   2  -6 2380.22  183.55
   5  -2  -6 1612.13  101.09
  -5  -2   6 2273.83  233.79
  -5  -2   6 2326.99  196.25
  -5  -2   6 2056.77  441.19
   5  -2  -6 2105.80  257.57
   5   2  -5  177.25   75.40
   5   2  -5  176.46   68.42
  -5   2   5  185.75   85.93
   5   2  -5  170.71   68.55
  -5   2   5  205.88  102.34
  -5   2   5  139.42   52.82
  -5  -2   5  148.96   65.94
   5  -2  -5  164.86   83.38
   5  -2  -5  173.97   56.53
  -5  -2   5  147.82   72.24
  -5  -2   5  239.48  123.01
   5  -2  -5  227.57   67.69
   5   2  -4 3083.45  288.16
  -5   2   4 4104.44  209.00
  -5   2   4 4098.16  323.90
   5   2  -4 3819.43  213.98
   5   2  -4 3950.17  313.52
  -5   2   4 3751.91  276.00
  -5  -2   4 3757.50  301.63
   5  -2  -4 3507.25  391.86
   5  -2  -4 3418.66  219.75
   5  -2  -4 3869.54  197.92
  -5  -2   4 4092.04  310.89
  -5  -2   4 3990.09  211.25
  -5   2   3 5670.89  285.30
  -5   2   3 5508.83  348.83
  -5   2   3 4866.52  296.12
   5   2  -3 4272.81  278.55
   5   2  -3 5186.67  315.20
   5  -2  -3 5299.88  333.42
  -5  -2   3 5336.70  275.33
   5  -2  -3 5883.16  303.22
  -5  -2   3 5333.01  349.36
   5  -2  -3 4984.38  323.90
  -5  -2   3 5164.00  313.36
   5   2  -218592.11  878.77
   5   2  -219973.31  988.24
   5   2  -216679.49  846.04
  -5   2   220224.37  939.66
  -5   2   221339.92 1069.26
  -5   2   220183.56 1003.19
   5  -2  -219169.47  957.00
  -5  -2   222203.57 1129.68
   5  -2  -219303.56  978.85
  -5  -2   217873.31  885.53
   5  -2  -219961.10  939.07
  -5  -2   220803.74  977.70
  -5   2   1 2911.69  194.67
   5   2  -1 2680.48  392.06
  -5   2   1 2277.08  108.91
   5   2  -1 2532.11  162.39
  -5   2   1 2829.69  207.43
   5   2  -1 2838.57  185.78
   5  -2  -1 2610.70  196.37
  -5  -2   1 2619.01  207.66
  -5  -2   1 2355.69  120.11
   5  -2  -1 2472.46  199.52
   5  -2  -1 2754.27  158.28
  -5  -2   1 2504.38  145.55
  -5   2   014375.01  749.81
   5   2   013598.29  663.89
   5   2   013315.59  793.26
  -5   2   014083.27  707.85
   5   2   013345.05  670.14
   5  -2   013419.73  697.13
   5  -2   013050.25  676.32
  -5  -2   012223.95  604.45
  -5  -2   013287.02  639.70
  -5  -2   014390.44  755.42
   5  -2   014795.88  707.67
  -5   2  -1 2800.94  153.00
   5   2   1 3452.44  247.09
   5   2   1 3537.30  202.54
   5   2   1 3663.00  211.54
  -5   2  -1 3919.90  284.58
  -5   2  -1 3522.66  221.63
  -5  -2  -1 3409.15  195.45
   5  -2   1 3606.71  289.29
   5  -2   1 3170.18  210.40
   5  -2   1 4108.28  243.30
  -5  -2  -1 3710.48  253.20
  -5  -2  -1 3898.44  223.04
   5   2   2 2936.42  169.52
  -5   2  -2 3418.63  219.81
   5   2   2 3349.58  245.83
  -5   2  -2 3366.15  217.40
   5   2   2 3136.24  177.80
   5   2   2 3280.97  199.48
  -5   2  -2 4420.01  249.08
  -5  -2  -2 3879.57  357.05
   5  -2   2 3746.60  217.50
   5  -2   2 3446.34  221.87
   5  -2   2 3078.20  220.39
  -5  -2  -2 3359.56  187.49
  -5   2  -3 1642.19  128.25
   5   2   3 1367.75  106.52
   5   2   3 1344.61   80.98
   5   2   3 1306.92  158.62
   5   2   3 1451.61   99.99
  -5   2  -3 1572.14  133.62
  -5  -2  -3 1438.33  105.74
   5  -2   3 1504.68  132.74
   5  -2   3 1472.03  102.69
  -5  -2  -3 1605.43  132.39
   5  -2   3 1433.00  134.16
  -5   2  -415206.10 1077.44
   5   2   414266.27 1004.18
   5   2   414317.61 1036.58
  -5   2  -413840.87  963.18
   5   2   416330.80 1141.82
  -5   2  -414874.17 1055.52
   5  -2   416227.73 1125.24
   5  -2   415106.54 1073.78
   5  -2   415069.04 1079.87
  -5  -2  -415558.39 1114.63
   5   2   5   10.82   22.28
  -5   2  -5   -4.43   16.48
  -5   2  -5  -12.28   38.94
   5   2   5   11.61   19.46
  -5   2  -5    4.72   17.44
   5   2   5   17.97   26.84
  -5  -2  -5   18.11   28.90
   5  -2   5   -5.92   37.81
   5  -2   5   15.77   13.15
   5  -2   5    2.98   22.78
   5   2   6 2199.59  280.55
  -5   2  -6 2305.78  437.03
  -5   2  -6 2065.35  205.97
   5   2   6 1803.94  210.38
  -5   2  -6 1460.27  214.98
   5   2   6 1605.48  110.65
   5  -2   6 1609.97  177.12
  -5  -2  -6 1738.01  168.90
   5  -2   6 1863.19  237.86
   5  -2   6 1960.26  260.40
  -5   2  -7  320.53  137.93
  -5   2  -7  235.71  113.23
   5   2   7  287.60  100.86
  -5   2  -7  257.32   44.85
   5   2   7  306.15   77.69
   5   2   7  189.44   94.81
   5  -2   7  285.53  148.08
  -5  -2  -7  332.87   85.80
   5  -2   7  333.23  112.55
   5  -2   7  247.73  221.81
   5   2   8  642.67  198.16
  -5   2  -8  552.93  122.84
  -5   2  -8  790.25  149.41
   5   2   8  515.72  214.65
  -5   2  -8  580.06  180.94
   5   2   8  489.47  141.50
  -5  -2  -8  752.91  304.71
   5  -2   8  530.71  275.89
   5  -2   8  512.63  258.51
   5  -2   8  577.26  226.62
   5   2   9 1097.79   92.23
  -5   2  -9 1236.82  130.86
  -5   2  -9 1462.07  120.02
   5   2   9 1453.02  211.55
   5   2   9 1294.72  382.07
  -5  -2  -9 1214.15  340.03
   5  -2   9 1391.00  219.07
   5  -2   9 1432.29  479.26
  -5   2 -10  612.85  202.49
  -5   2 -10  640.00  226.86
   5   2  10  645.39  311.52
   5   2  10  629.81  239.09
   5  -2  10  692.07  152.81
  -5  -2 -10  669.18  197.33
   5  -2  10  653.47  228.06
  -5   2 -11    9.81   28.09
  -5   2 -11   -3.18   42.13
   5   2  11    9.24   32.55
   5   2  11   48.40   38.49
   5   2  11   10.54   18.82
   5  -2  11   28.86   32.43
   5  -2  11  -21.82   59.07
   5   2  12 2221.97  550.55
  -5   2 -12 2627.13  843.37
  -5   2 -12   14.26   25.56
   5   2  12 1724.14  411.27
   5  -2  12 2330.06  406.41
   5  -2  12 2025.58  391.71
   5   2  13   10.83   34.38
  -5   2 -13   63.84   55.66
   5   2  13   23.28   48.66
   5  -2  13   19.99   43.61
   5  -2  13    6.46   35.51
   5   2  14 1423.39  364.52
   5   2  14 1633.14  461.03
  -5   2 -14 2048.05  367.82
   5  -2  14 1049.33  810.42
  -5   2 -15  135.55   65.93
   5   2  15  144.72  111.95
   5   2  15  131.23  142.31
   5  -2  15  193.55  168.21
   5   2  16  362.33  192.43
  -5   3  16   26.47   54.46
  -5   3  15  365.56  316.87
  -5  -3  15  222.67  254.26
  -5   3  14   24.51   46.14
  -5   3  14   -3.49   49.23
   5   3 -14  -19.63   78.41
  -5  -3  14   34.49   80.09
   5   3 -13  599.26  257.39
   5   3 -13  551.85  194.31
  -5   3  13  515.19  400.72
  -5   3  13  537.54   93.54
  -5  -3  13  584.74  385.66
  -5   3  12   -4.15   40.98
  -5   3  12   37.05   38.33
  -5   3  12   22.33   40.03
   5   3 -12   44.01   24.38
  -5   3  12    5.56   21.18
   5   3 -12   40.47   42.90
  -5  -3  12   38.12   45.14
  -5  -3  12   28.51   49.36
  -5   3  11 2781.34  381.40
   5   3 -11 2532.58  364.99
   5   3 -11 1938.00  233.55
  -5   3  11 2567.82  416.27
  -5   3  11 1943.94  233.34
  -5   3  11 2470.44  302.01
  -5  -3  11 2060.92  860.68
   5  -3 -11 2533.15  324.76
  -5  -3  11 2893.94  359.25
  -5   3  10 1931.35  275.65
   5   3 -10 3196.28  386.79
  -5   3  10 1574.42  187.48
   5   3 -10 1938.86  562.92
  -5   3  10 1863.54  259.44
  -5  -3  10 1669.36  722.54
  -5  -3  10 1895.62  253.38
   5  -3 -10 1872.80  245.54
   5  -3 -10 1978.42  474.61
  -5   3   9 5394.79  329.60
   5   3  -9 4756.52  288.08
  -5   3   9 5086.91  155.89
  -5   3   9 5561.55  263.05
  -5   3   9 5647.87  149.52
  -5  -3   9 4411.99  406.93
   5  -3  -9 4771.51  349.86
   5  -3  -9 5049.69  206.39
  -5  -3   9 5254.48  183.57
   5   3  -8  677.55  221.82
   5   3  -8  528.93   46.92
  -5   3   8  593.60  103.49
   5   3  -8  752.48  515.37
  -5   3   8  712.18  477.37
  -5   3   8  711.44  136.75
  -5   3   8  671.09  137.45
  -5  -3   8  656.63  300.58
   5  -3  -8  687.59  254.36
  -5  -3   8  582.40  226.79
  -5  -3   8  772.84  145.60
   5  -3  -8  911.04  305.49
   5   3  -7  840.31  334.45
  -5   3   7  834.50  397.79
  -5   3   7 1069.27  154.47
   5   3  -7  739.44  345.67
  -5   3   7  829.64   89.12
   5   3  -7  844.90  129.58
   5  -3  -7  901.63  235.83
  -5  -3   7  728.63  339.13
   5  -3  -7  933.86  200.38
  -5  -3   7  737.67  219.96
  -5  -3   7  954.75  135.31
   5  -3  -7  871.24   85.66
   5   3  -6  726.97  420.77
  -5   3   6  889.97  404.23
   5   3  -6  890.01  331.86
  -5   3   6  806.44   64.88
   5   3  -6  716.56   80.05
  -5   3   6  757.46  293.58
  -5  -3   6  781.88  305.99
   5  -3  -6  750.93  322.35
  -5  -3   6  764.60  252.07
   5  -3  -6  973.89  108.25
   5  -3  -6  627.58   60.98
  -5  -3   6  814.03   69.02
  -5   3   5 3431.41  299.42
   5   3  -5 3167.08  255.87
  -5   3   5 3517.42  265.10
   5   3  -5 3263.45  498.61
  -5   3   5 4273.86  383.04
   5   3  -5 3857.09  351.81
   5  -3  -5 3879.26  293.33
  -5  -3   5 3628.66  282.72
  -5  -3   5 3141.69  288.13
   5  -3  -5 3765.45  557.59
   5  -3  -5 3054.16  258.60
  -5  -3   5 3575.64  334.62
   5   3  -4  283.72  117.03
  -5   3   4  241.80   86.10
  -5   3   4  249.47  132.38
  -5   3   4  182.74   72.33
   5   3  -4  220.64  105.34
   5   3  -4  284.51  103.63
   5  -3  -4  304.76   93.32
   5  -3  -4  234.63  124.74
  -5  -3   4  226.68   91.25
  -5  -3   4  221.03  124.31
   5  -3  -4  278.21  136.13
  -5  -3   4  235.69  140.08
  -5   3   3   41.68   39.10
  -5   3   3    4.03   12.02
   5   3  -3   -4.74   39.74
   5   3  -3   24.98   30.39
   5   3  -3   34.77   31.13
  -5   3   3   23.89   19.27
   5  -3  -3   15.34   31.40
  -5  -3   3   51.42   66.52
   5  -3  -3   14.58   26.06
  -5  -3   3    5.08   12.23
  -5  -3   3   19.54   44.36
   5  -3  -3  -16.63   44.56
   5   3  -2  657.73  188.43
  -5   3   2  914.05  327.62
   5   3  -2  692.30  102.05
  -5   3   2  726.05  104.81
   5   3  -2  611.94  147.63
  -5   3   2  691.91   65.05
  -5  -3   2  763.69  152.80
   5  -3  -2  558.41   88.46
   5  -3  -2  703.49  264.04
  -5  -3   2  794.95  422.41
  -5  -3   2  628.02  138.42
   5  -3  -2  744.89   71.24
   5   3  -1 6680.24  391.18
   5   3  -1 8616.64  468.09
   5   3  -1 7419.08  395.20
  -5   3   1 8360.80  439.95
  -5   3   1 8842.63  452.26
  -5   3   1 8642.77  490.16
   5  -3  -1 7531.55  417.65
  -5  -3   1 8136.44  480.68
  -5  -3   1 8452.07  431.36
   5  -3  -1 8400.66  431.75
  -5  -3   1 8048.05  441.55
   5  -3  -1 7756.99  454.12
   5   3   0 1992.71  186.14
   5   3   0 2457.72  274.50
  -5   3   0 2384.27  199.54
   5   3   0 2235.70  140.51
  -5   3   0 2310.55  100.29
  -5   3   0 2251.39  144.86
   5  -3   0 2258.44  164.27
   5  -3   0 2257.19  161.14
  -5  -3   0 2449.73  203.68
  -5  -3   0 2176.90  147.26
  -5  -3   0 2389.14  154.26
   5  -3   0 2252.87  238.46
  -5   3  -114269.92  746.33
   5   3   112617.18  649.71
   5   3   113219.39  707.60
  -5   3  -111714.59  568.10
   5   3   115162.82  753.34
  -5   3  -113673.80  686.13
   5  -3   112733.52  664.14
   5  -3   112056.13  643.33
  -5  -3  -113047.01  642.90
  -5  -3  -112964.74  650.57
  -5  -3  -113946.17  735.62
   5  -3   113161.51  648.14
   5   3   2  746.01  246.11
  -5   3  -2  534.03   65.84
  -5   3  -2  631.01  189.92
   5   3   2  656.82  290.66
  -5   3  -2  500.31   96.05
   5   3   2  617.43  154.83
  -5  -3  -2  564.22   75.10
   5  -3   2  551.42  145.97
   5  -3   2  556.52   89.50
  -5  -3  -2  565.03  104.18
   5  -3   2  483.27   83.58
  -5  -3  -2  699.99  292.25
   5   3   3 2592.13  221.53
   5   3   3 2555.65  248.37
  -5   3  -3 2403.84  211.32
  -5   3  -3 1637.43  134.49
  -5   3  -3 2920.84  259.03
   5   3   3 2551.18  200.17
  -5  -3  -3 2734.18  252.87
  -5  -3  -3 2538.22  226.63
   5  -3   3 2445.39  224.50
   5  -3   3 2381.44  218.73
  -5  -3  -3 2443.82  193.40
   5  -3   3 2864.19  329.69
   5   3   4   28.56   48.95
   5   3   4   33.42   13.11
  -5   3  -4   47.08   22.97
   5   3   4   48.66   16.87
  -5   3  -4   11.11   23.97
   5   3   4   40.04   27.47
  -5   3  -4   39.67   35.53
   5  -3   4   38.79   29.58
   5  -3   4   27.78   29.05
   5  -3   4   26.66   23.78
  -5  -3  -4   17.69   25.43
  -5  -3  -4   46.79   15.37
  -5   3  -5 7140.89  567.45
   5   3   5 7347.48  562.09
   5   3   5 7397.43  532.01
   5   3   5 7299.65  582.13
  -5   3  -5 7104.84  572.42
   5   3   5 7302.86  559.02
   5  -3   5 7295.58  628.24
   5  -3   5 7020.53  548.05
  -5  -3  -5 7112.30  540.03
  -5  -3  -5 7261.83  518.42
   5  -3   5 8804.91  670.91
  -5   3  -6 1320.07  240.86
   5   3   6 1408.17  164.02
   5   3   6 1366.33   96.62
  -5   3  -6 1310.57  314.55
   5   3   6 1512.84  142.08
   5   3   6 1473.56  324.29
  -5   3  -6 1864.22  177.47
  -5  -3  -6 1400.67  194.70
   5  -3   6 1686.96  231.84
   5  -3   6 1442.60  186.21
  -5  -3  -6 1489.30  104.22
   5  -3   6 1311.48  141.63
   5   3   7 3404.50  355.16
  -5   3  -7 2548.40  278.10
   5   3   7 2511.95  254.84
   5   3   7 2642.58  334.08
  -5   3  -7 1823.89  164.42
   5  -3   7 2296.10  245.84
   5  -3   7 2352.14  267.00
  -5  -3  -7 2710.09  281.52
   5  -3   7 3143.86  281.58
   5  -3   7 2527.38  439.49
   5   3   8   31.28   35.80
   5   3   8   18.09   30.00
  -5   3  -8   29.73   30.84
   5   3   8    9.24   25.55
  -5   3  -8   23.51   21.29
   5  -3   8    9.26   24.42
   5  -3   8   21.86   27.86
   5  -3   8   18.96   23.23
  -5  -3  -8   27.54   26.51
   5  -3   8   -5.23   47.92
   5   3   9  145.82   49.09
  -5   3  -9   89.75   61.06
   5   3   9  113.19   47.29
  -5   3  -9  135.88   49.35
  -5  -3  -9  129.30   67.58
   5  -3   9  176.70   96.10
   5  -3   9   92.08   44.50
  -5   3 -10   31.68   52.83
   5   3  10   70.00   47.43
   5   3  10   -0.89   31.13
  -5   3 -10   59.57   24.84
   5  -3  10   16.08   21.48
  -5  -3 -10   42.99   43.22
   5  -3  10   48.16   35.47
   5   3  11 2298.29  552.84
  -5   3 -11 2236.12  571.57
   5   3  11 2371.62  265.00
  -5   3 -11 1426.59  570.73
   5   3  11 2466.89  283.24
   5  -3  11 2381.97  378.37
   5  -3  11 2660.13  290.70
   5   3  12  162.51  113.30
  -5   3 -12   12.18   35.65
   5   3  12  129.06  102.32
  -5   3 -12  166.20   76.53
   5  -3  12  115.00   63.37
   5  -3  12  116.17  113.51
  -5   3 -13 1999.96  477.85
   5   3  13 2099.22  562.43
   5   3  13 1821.90  427.65
   5  -3  13 1905.12  443.77
   5  -3  13 2403.89  340.95
   5   3  14   33.03   66.40
   5   3  14   37.87   48.16
  -5   3 -14   72.18   60.57
   5  -3  14  112.28   88.56
   5   3  15  927.03  256.07
  -5   3 -15  910.14  560.76
   5   3  15  466.79  549.23
  -5   4  15   36.54   56.71
   5   4 -14   85.63   75.43
  -5   4  14   12.09   83.79
  -5  -4  14  121.08   75.96
  -5   4  13  185.92   78.18
   5   4 -13  100.73   51.09
   5   4 -13  125.54   96.97
  -5  -4  13  138.43  173.04
   5   4 -12  288.15  144.81
  -5   4  12  199.67  177.66
  -5   4  12  176.27  116.10
   5   4 -12  142.13   73.55
  -5  -4  12  244.41  139.40
  -5   4  11  539.52  156.24
  -5   4  11  564.85  190.43
   5   4 -11 1927.98  619.72
   5   4 -11  555.45  219.46
  -5   4  11  406.43  301.86
  -5   4  11  509.78  217.32
   5  -4 -11  614.55  297.56
  -5  -4  11  405.94  301.43
  -5  -4  11  516.15  286.44
   5   4 -10  256.74  108.68
   5   4 -10  212.38   79.05
  -5   4  10  112.39   93.21
  -5   4  10  296.37  166.11
  -5   4  10  183.25  188.46
   5  -4 -10  237.25  146.29
   5  -4 -10  217.06   82.80
  -5  -4  10  146.27   85.17
  -5  -4  10  185.44  127.20
  -5   4   9  264.66  106.66
   5   4  -9  264.50  127.74
  -5   4   9  232.28  204.68
   5   4  -9  192.35   74.09
  -5   4   9  225.92   51.74
   5  -4  -9  258.12   94.78
  -5  -4   9  172.23   96.99
   5  -4  -9  336.63  102.22
  -5  -4   9  282.91  115.84
   5   4  -8 3849.32  735.60
  -5   4   8 3999.93  322.19
  -5   4   8 3926.06  204.77
   5   4  -8 4212.55  155.82
  -5   4   8 3816.41  166.67
   5  -4  -8 3838.65  470.87
  -5  -4   8 4001.89  179.36
   5  -4  -8 4076.98  278.63
   5  -4  -8 4353.98  154.64
  -5  -4   8 3548.02  246.63
   5   4  -7 1404.72  477.72
   5   4  -7 1173.99   90.16
  -5   4   7 1250.74  542.85
  -5   4   7 1240.29  169.96
  -5   4   7 1167.32   86.14
   5   4  -7  965.97  519.53
   5  -4  -7 1356.98  186.98
  -5  -4   7 1149.87  198.13
   5  -4  -7 1537.10  476.41
  -5  -4   7 1277.00  132.65
   5  -4  -7 1260.20  121.82
  -5  -4   7  927.43  430.04
   5   4  -6 8437.19  715.47
   5   4  -6 8946.20  756.71
   5   4  -6 8971.93  707.84
  -5   4   6 8965.93  712.17
  -5   4   6 9413.27  817.24
  -5   4   6 9475.03  749.15
  -5  -4   6 8877.90  707.23
  -5  -4   6 8470.12  723.58
  -5  -4   6 8669.36  736.04
   5  -4  -6 9682.78  755.92
   5  -4  -6 8565.58  744.80
   5  -4  -6 7940.62  629.21
  -5   4   5   22.80   30.91
  -5   4   5   -1.50   23.74
   5   4  -5   40.74   39.48
   5   4  -5   26.29   31.28
  -5   4   5   -7.37   68.83
   5   4  -5   19.98   23.81
   5  -4  -5   18.93   20.17
  -5  -4   5   21.28   28.76
   5  -4  -5   34.94   24.55
  -5  -4   5   -7.03   60.33
   5  -4  -5   27.36   34.65
  -5  -4   5   -0.38   47.70
   5   4  -4 5752.61  443.82
  -5   4   4 7040.60  607.92
   5   4  -4 6208.54  411.01
   5   4  -4 6194.87  475.25
  -5   4   4 6599.47  487.47
  -5   4   4 5993.40  415.89
   5  -4  -4 6343.49  431.13
   5  -4  -4 6434.40  477.66
  -5  -4   4 6731.54  559.05
  -5  -4   4 7119.99  586.06
   5  -4  -4 6227.01  527.75
  -5  -4   4 6456.81  487.37
   5   4  -3  186.02   79.26
  -5   4   3  195.05   93.72
   5   4  -3  256.07  110.59
  -5   4   3  182.39   88.02
   5   4  -3  162.10   46.25
  -5   4   3  207.69  100.89
  -5  -4   3  229.32  107.37
   5  -4  -3  150.43   63.02
  -5  -4   3  244.15   96.29
   5  -4  -3  177.39   94.47
  -5  -4   3  165.66  108.02
   5  -4  -3  178.04   58.62
  -5   4   2 2273.58  453.58
   5   4  -2 2289.32  238.86
  -5   4   2 2049.49  177.24
  -5   4   2 1841.66  159.99
   5   4  -2 2083.87  188.70
   5   4  -2 1786.76  220.40
  -5  -4   2 1953.49  198.83
   5  -4  -2 2352.90  216.97
   5  -4  -2 1967.12  221.62
   5  -4  -2 1926.13  241.73
  -5  -4   2 2253.79  314.42
  -5  -4   2 2063.40  182.29
  -5   4   1  194.71   89.09
  -5   4   1  118.28   76.45
   5   4  -1  135.45   58.85
   5   4  -1  150.56   81.52
   5   4  -1  167.81   52.39
  -5   4   1  209.09   73.82
   5  -4  -1  133.01   76.79
   5  -4  -1  161.91   53.58
  -5  -4   1  113.27   53.82
  -5  -4   1  126.69   43.71
  -5  -4   1  123.25   53.58
   5  -4  -1  155.62   86.58
  -5   4   0 4231.42  323.61
   5   4   0 3583.76  302.60
  -5   4   0 4680.84  394.94
   5   4   0 4432.72  346.40
   5   4   0 4482.34  357.08
  -5   4   0 4795.36  366.74
   5  -4   0 4217.74  338.24
   5  -4   0 4596.87  392.18
  -5  -4   0 4777.01  407.14
   5  -4   0 4257.88  365.84
  -5  -4   0 4507.12  347.47
  -5  -4   0 4405.06  419.84
   5   4   1   17.36   24.42
   5   4   1   27.95   33.61
  -5   4  -1   26.09   22.22
  -5   4  -1   19.50   29.61
   5   4   1   48.15   21.45
  -5   4  -1   31.17   28.26
  -5  -4  -1   42.42   23.87
   5  -4   1   47.45   43.57
  -5  -4  -1   35.80   21.53
   5  -4   1   21.57   31.28
  -5  -4  -1   23.45   28.06
   5  -4   1   42.85   44.72
   5   4   2 3758.16  399.58
  -5   4  -2 4911.80  397.10
   5   4   2 3602.88  298.06
   5   4   2 3758.22  303.86
  -5   4  -2 3859.60  392.58
  -5   4  -2 3732.25  307.88
   5  -4   2 3640.61  345.09
   5  -4   2 3671.78  420.41
   5  -4   2 3919.85  322.12
  -5  -4  -2 3911.56  344.84
  -5  -4  -2 3966.74  331.50
  -5  -4  -2 4173.95  355.51
   5   4   3 1217.94  104.98
  -5   4  -3  942.82  116.66
   5   4   3 1073.17  112.50
  -5   4  -3 1050.76  343.25
   5   4   3 1105.07  147.11
  -5   4  -3 1116.58  147.04
  -5  -4  -3 1342.85  313.18
  -5  -4  -3 1094.69  195.09
   5  -4   3 1082.84  203.75
   5  -4   3  991.71  214.59
   5  -4   3 1252.05  111.13
  -5  -4  -3 1299.54  259.47
  -5   4  -4 2654.13  222.44
  -5   4  -4 3568.41  296.31
  -5   4  -4 3312.75  252.87
   5   4   4 3641.23  255.93
   5   4   4 3609.64  283.13
   5   4   4 3558.85  308.12
   5  -4   4 3744.77  358.36
   5  -4   4 3493.64  289.18
  -5  -4  -4 3427.20  256.94
  -5  -4  -4 3667.83  284.59
   5  -4   4 3747.28  333.03
  -5  -4  -4 3790.50  284.90
   5   4   5    7.19   12.05
  -5   4  -5    3.38   12.93
  -5   4  -5   12.85   19.27
  -5   4  -5    8.48   24.52
   5   4   5    1.89   28.73
   5   4   5   14.13   28.87
   5  -4   5    5.98   31.30
  -5  -4  -5    6.05   27.75
   5  -4   5   32.65   44.48
   5  -4   5   15.27   28.21
  -5  -4  -5   10.86   18.52
  -5  -4  -5   17.46   35.46
   5   4   6 5326.10  440.62
   5   4   6 6857.45  518.99
  -5   4  -6 5689.40  519.22
   5   4   6 5381.98  485.63
  -5   4  -6 5333.01  420.71
   5   4   6 5033.58  408.91
   5  -4   6 5354.93  447.91
   5  -4   6 5602.94  480.84
  -5  -4  -6 5447.89  420.67
   5  -4   6 6111.80  502.71
  -5  -4  -6 5698.99  450.50
   5  -4   6 5211.35  452.15
   5   4   7   70.33   26.24
  -5   4  -7   13.94   64.12
   5   4   7   81.28   49.15
   5   4   7   38.03   48.34
  -5   4  -7  171.07   72.96
   5   4   7   59.09   40.04
  -5  -4  -7   66.02   50.57
  -5  -4  -7   75.85   38.01
   5  -4   7   43.56   55.50
   5  -4   7   91.16   36.80
   5  -4   7   88.03   37.75
   5   4   8 3590.15  396.76
   5   4   8 3755.05  363.20
  -5   4  -8 3622.38  395.89
  -5   4  -8 4022.36  416.29
   5   4   8 3374.97  382.20
   5  -4   8 3905.56  587.65
   5  -4   8 3304.92  377.33
  -5  -4  -8 3889.66  405.59
   5   4   9  351.94  192.13
   5   4   9  389.59   69.10
  -5   4  -9  307.79  211.57
   5   4   9  404.11  165.95
  -5   4  -9  290.75   88.11
   5   4   9  353.10   86.31
   5  -4   9  281.55  117.83
   5  -4   9  372.38  139.68
  -5  -4  -9  302.28  152.71
  -5   4 -10  186.99   99.99
   5   4  10  133.88   45.18
  -5   4 -10  199.40   87.83
   5   4  10  199.18  130.41
   5   4  10  174.21   86.39
   5   4  10  130.08   50.61
   5  -4  10  234.54  122.28
   5  -4  10  145.32  141.99
   5   4  11  126.71  106.38
   5   4  11  265.17  209.79
   5   4  11  282.54  177.79
  -5   4 -11  202.34  107.78
  -5   4 -11  216.83   92.79
   5  -4  11  226.18  212.18
   5  -4  11  318.84  165.19
  -5   4 -12 1032.45  291.97
   5   4  12 1131.36  323.65
   5   4  12 1052.47  553.59
   5  -4  12 1115.06  369.56
   5  -4  12  996.46  570.43
   5   4  13    0.02   64.79
  -5   4 -13   -2.27   23.36
   5   4  13   70.35   62.33
   5  -4  13    5.69   48.11
   5  -4  13   22.50   34.77
  -5   4 -14  490.30  166.03
   5   4  14  338.64  274.39
   5  -4  14  292.46  269.79
  -5   5  15  366.20  483.88
  -5   5  14  249.22  368.47
   5   5 -13  678.47  408.78
   5   5 -13  610.97  258.21
  -5  -5  13  560.09  376.54
   5   5 -12   58.63   80.07
  -5   5  12   47.13   43.49
   5   5 -12  253.98  135.06
   5  -5 -12  113.74  117.93
  -5  -5  12   78.74   86.04
   5   5 -11 1581.69  380.39
  -5   5  11 1674.20  219.95
   5   5 -11 1251.70  302.57
   5  -5 -11 1606.49  706.57
  -5  -5  11 1376.65  350.36
  -5  -5  11 1485.87  629.10
   5   5 -10  928.99  274.55
  -5   5  10  781.26  240.62
  -5   5  10  708.68  197.95
  -5   5  10  836.45  144.35
   5   5 -10  631.72  217.76
  -5   5  10  623.61  240.98
   5  -5 -10  821.38  388.46
  -5  -5  10  956.16  214.52
  -5  -5  10  803.28  291.69
  -5   5   9  342.07  195.66
   5   5  -9  487.39  160.63
   5   5  -9  589.57  185.39
  -5   5   9  374.05  103.38
  -5   5   9  428.54  107.98
   5  -5  -9  530.45  127.01
  -5  -5   9  311.94  212.46
  -5  -5   9  423.42  231.55
   5  -5  -9  402.04  170.94
   5   5  -8   63.88   27.94
  -5   5   8   23.73   16.55
  -5   5   8   28.74   17.23
   5   5  -8   48.17   64.02
  -5   5   8   52.30   27.22
   5  -5  -8   45.79   31.01
   5  -5  -8   56.96   30.93
  -5  -5   8   40.34   34.51
  -5  -5   8   64.65   38.53
  -5   5   7 3868.35   95.43
   5   5  -7 4427.85 1031.26
  -5   5   7 3746.94  193.47
   5   5  -7 4125.54  300.99
  -5  -5   7 3528.55  250.19
   5  -5  -7 3238.07  730.39
   5  -5  -7 4037.53   94.77
  -5  -5   7 3878.78  191.32
   5  -5  -7 4297.73  201.32
   5   5  -6 1254.46  419.13
   5   5  -6 1129.27  124.53
  -5   5   6 1120.67  203.09
  -5   5   6  993.74  442.36
  -5   5   6 1013.28  117.93
   5  -5  -6 1113.98  172.16
  -5  -5   6 1132.58  156.13
   5  -5  -6 1338.73  141.68
  -5  -5   6  909.17  394.23
  -5  -5   6 1169.80  297.27
   5  -5  -6 1399.74  567.64
  -5   5   5 4044.54  304.56
   5   5  -5 4132.38  385.23
   5   5  -5 3903.04  324.56
  -5   5   5 4079.69  336.17
  -5   5   5 4706.82  437.71
   5   5  -5 4408.54  527.92
   5  -5  -5 3852.81  294.08
  -5  -5   5 3798.76  367.13
   5  -5  -5 4010.97  412.91
  -5  -5   5 3645.81  431.80
   5  -5  -5 4716.69  404.45
  -5  -5   5 4516.25  369.29
  -5   5   4  304.00   86.11
  -5   5   4  451.69  201.54
   5   5  -4  358.51  140.23
  -5   5   4  308.41   84.59
   5   5  -4  316.15  141.60
   5   5  -4  215.97  134.52
  -5  -5   4  325.55  165.00
  -5  -5   4  286.97  148.60
   5  -5  -4  351.12  108.30
   5  -5  -4  410.82  158.15
   5  -5  -4  362.61  214.03
  -5  -5   4  309.37  139.92
   5   5  -3 5627.22  602.49
  -5   5   3 6385.78  502.53
  -5   5   3 6500.99  527.37
   5   5  -3 7465.52  645.71
  -5   5   3 7167.43  649.51
   5   5  -3 6526.59  539.21
  -5  -5   3 6346.59  571.32
  -5  -5   3 6550.22  541.79
   5  -5  -3 6715.09  608.86
  -5  -5   3 7193.72  632.76
   5  -5  -3 6956.45  570.61
   5  -5  -3 6400.19  655.62
   5   5  -2   33.01   20.94
   5   5  -2   42.84   66.80
  -5   5   2   50.79   24.34
  -5   5   2   64.96   80.03
   5   5  -2   38.35   44.71
  -5   5   2   57.73   35.82
  -5  -5   2   84.78   69.76
   5  -5  -2   36.39   35.35
  -5  -5   2   12.58   25.78
   5  -5  -2   47.29   29.09
   5  -5  -2   41.14   27.25
  -5  -5   2   -1.58   34.72
   5   5  -1 2184.74  303.84
   5   5  -1 2648.89  219.55
  -5   5   1 2762.46  213.83
   5   5  -1 2906.18  250.68
  -5   5   1 2779.44  274.12
  -5   5   1 4428.64  325.89
   5  -5  -1 2663.66  256.06
  -5  -5   1 2972.41  279.84
  -5  -5   1 2633.84  239.70
   5  -5  -1 3560.24  269.71
   5  -5  -1 2406.19  201.10
  -5  -5   1 3000.20  289.15
  -5   5   0  282.49  141.29
  -5   5   0  315.77   80.66
   5   5   0  327.58  111.28
   5   5   0  193.36  129.20
   5   5   0  389.20   97.78
  -5   5   0  425.37  141.69
   5  -5   0  390.79  152.05
  -5  -5   0  272.19  103.71
  -5  -5   0  338.01  146.04
  -5  -5   0  252.79  144.94
   5  -5   0  321.25  161.31
   5  -5   0  274.80  135.42
  -5   5  -1 2506.91  194.88
  -5   5  -1 3052.91  515.18
   5   5   1 2594.15  310.87
  -5   5  -1 2975.73  794.26
   5   5   1 2662.53  439.77
   5   5   1 2480.63  284.91
  -5  -5  -1 3134.75  602.59
   5  -5   1 2706.24  219.44
  -5  -5  -1 2870.02  228.94
   5  -5   1 2704.77  483.28
  -5  -5  -1 3063.88  322.13
   5  -5   1 2916.25  239.52
  -5   5  -2  979.62  483.51
   5   5   2 1054.77  130.10
   5   5   2 1068.26  136.48
  -5   5  -2  985.07  134.33
  -5   5  -2 1031.67  122.25
   5   5   2  890.63  125.63
   5  -5   2  927.92  122.14
  -5  -5  -2 1088.42  369.53
   5  -5   2 1000.30  198.99
  -5  -5  -2 1024.16  183.53
  -5  -5  -2 1112.92  217.98
   5  -5   2 1033.98  178.86
   5   5   3 6484.11  547.99
   5   5   3 7087.38  582.74
   5   5   3 5936.92  502.20
  -5   5  -3 7195.35  623.86
  -5   5  -3 6124.23  509.99
   5  -5   3 6639.31  562.38
  -5  -5  -3 6648.88  553.17
  -5  -5  -3 7584.56  642.56
   5  -5   3 6308.37  525.14
  -5  -5  -3 6209.15  524.47
   5  -5   3 6400.80  703.17
   5  -5   3 6061.92  508.30
  -5   5  -4   13.30   10.70
   5   5   4   12.98   19.89
   5   5   4   38.67   30.62
  -5   5  -4    9.48   45.06
   5   5   4   -8.49   40.62
  -5  -5  -4   25.18   27.85
   5  -5   4    5.83   34.02
   5  -5   4   23.04   30.28
   5  -5   4    7.94   23.74
  -5  -5  -4   32.49   32.30
  -5  -5  -4   17.98   32.56
   5  -5   4   17.34   15.62
   5   5   5 6805.92  511.36
   5   5   5 7772.45  604.88
  -5   5  -5 6507.40  543.06
  -5   5  -5 5579.77  405.64
   5   5   5 8730.11  616.47
   5  -5   5 6761.90  534.47
   5  -5   5 6776.30  520.53
   5  -5   5 6693.18  506.42
  -5  -5  -5 6929.67  496.00
  -5  -5  -5 7549.63  534.08
  -5  -5  -5 8024.42  582.73
   5  -5   5 7008.19  573.06
   5   5   6  108.56   71.53
   5   5   6  267.00  107.39
   5   5   6  278.60  139.22
  -5   5  -6  103.54  115.65
  -5   5  -6  165.92   57.81
  -5  -5  -6  226.06   95.35
   5  -5   6  210.67   80.57
   5  -5   6  156.75   64.29
   5  -5   6  172.39   96.43
  -5  -5  -6  209.82  118.58
   5   5   7 4421.45  470.84
  -5   5  -7 5583.55  596.46
   5   5   7 5132.37  517.72
  -5   5  -7 3649.28  368.30
   5   5   7 4373.86  461.25
  -5  -5  -7 4675.96  464.82
   5  -5   7 4497.57  485.33
   5  -5   7 4165.39  576.86
  -5  -5  -7 4659.42  475.45
  -5   5  -8   26.13   32.05
   5   5   8    2.73   50.07
   5   5   8   27.87   45.35
   5   5   8   -1.55   21.61
  -5   5  -8   10.20   34.54
   5  -5   8   -6.60   56.33
  -5  -5  -8   18.86   24.22
   5  -5   8   17.78   35.24
  -5  -5  -8   17.30   24.80
   5   5   9 3746.56  731.31
   5   5  10   12.22   20.88
   5   5  10   32.27   39.98
   5   5  10   11.17   13.88
  -5   5 -10   32.95   28.39
   5   5  10   19.21   39.49
   5  -5  10   11.18   44.76
   5  -5  10  -16.07   58.33
   5   5  11  749.33  529.08
  -5   5 -11  761.23  298.53
   5   5  11  712.56  326.77
   5  -5  11  757.64  518.49
   5  -5  11  783.13  467.91
   5   5  12   -0.55   67.43
  -5   5 -12   44.13   39.00
   5  -5  12   18.74   49.22
   5  -5  12   64.43   62.80
   5   5  13 1075.16  188.57
  -5   5 -13  664.63  273.46
   5  -5  13  769.25  520.88
   5  -5  13  643.99  726.07
   5  -5  14   87.40   97.10
  -5   6  14  326.43  621.35
   5  -6 -13   28.64   43.81
   5   6 -12 1410.09  634.17
   5   6 -12 1045.06  359.69
   5  -6 -12 1202.69  907.74
  -5  -6  12  926.10  841.78
   5   6 -11   68.21   54.19
   5   6 -11   11.79   14.90
  -5   6  11   71.63   54.65
   5  -6 -11   75.48   63.09
  -5  -6  11   61.53   45.56
   5   6 -10  717.55  220.59
   5   6 -10  847.16  360.99
  -5   6  10  441.10  336.94
   5  -6 -10  730.11  406.56
  -5  -6  10  394.49  313.31
   5   6  -9   19.46   35.99
   5   6  -9   24.92   34.81
  -5   6   9    9.95   23.74
   5  -6  -9    5.00   18.79
  -5  -6   9   37.51   49.93
   5  -6  -9    8.66   40.72
   5   6  -8  824.03  354.52
  -5   6   8  696.85  198.19
   5   6  -8  899.80  236.79
   5  -6  -8  768.92  359.99
   5  -6  -8  586.56  311.86
  -5  -6   8  434.30  278.56
  -5  -6   8  706.13  359.32
   5   6  -7   52.97   45.09
  -5   6   7   19.36   23.05
   5   6  -7   -2.83   38.01
  -5  -6   7   15.05   33.38
   5  -6  -7   64.42   68.12
  -5  -6   7   15.79   30.90
   5  -6  -7   39.32   34.08
  -5   6   6  140.84   80.77
   5   6  -6  296.07  108.04
   5   6  -6  228.07   85.50
   5  -6  -6  197.78  104.02
  -5  -6   6  226.46  117.36
  -5  -6   6  146.22  106.27
   5  -6  -6  221.58  103.50
   5   6  -5   23.16   41.36
  -5   6   5   16.71   17.69
   5   6  -5   21.20   38.40
  -5  -6   5   35.03   41.54
   5  -6  -5   18.21   35.31
   5  -6  -5    8.51   26.11
  -5  -6   5   15.45   40.41
  -5  -6   5    5.81   24.76
   5   6  -4 5877.24  578.49
   5   6  -4 5678.65  245.50
  -5   6   4 5651.26  223.65
  -5  -6   4 5930.70  323.53
  -5  -6   4 6339.42  351.71
   5  -6  -4 6350.64  281.00
   5  -6  -4 5622.97  387.50
  -5  -6   4 6220.23  246.07
   5  -6  -4 5957.63  146.98
   5   6  -3   20.79   29.86
   5   6  -3   28.55   29.18
  -5   6   3   20.63   23.19
  -5   6   3   31.37   92.80
   5   6  -3    4.46   28.61
   5  -6  -3  -13.15   56.93
   5  -6  -3   10.06   24.64
   5  -6  -3   16.19   13.38
  -5  -6   3    6.85   41.43
  -5  -6   3   20.62   36.57
   5  -6  -3    0.54   12.64
  -5  -6   3   26.82   22.06
   5   6  -2 6922.77  514.00
  -5   6   2 7535.15  600.86
   5   6  -2 6713.45  529.13
   5   6  -2 6537.93  501.73
  -5   6   2 6623.46  491.51
  -5  -6   2 6146.63  538.58
   5  -6  -2 6817.61 1020.08
  -5  -6   2 7650.39  609.27
   5  -6  -2 7443.45  511.42
  -5  -6   2 7095.44  559.63
   5  -6  -2 7152.01  559.86
   5  -6  -2 6720.94  480.15
  -5   6   1   33.69   35.06
   5   6  -1   -0.66   47.08
  -5   6   1  -15.95   65.74
   5   6  -1   13.18   31.70
   5   6  -1   42.08   36.19
   5  -6  -1   35.46   37.24
  -5  -6   1   27.12   31.46
  -5  -6   1    3.55   75.53
   5  -6  -1   12.55   41.06
  -5  -6   1   32.37   27.79
   5  -6  -1   20.52   20.48
   5  -6  -1   14.10   14.50
  -5   6   0 4652.16  437.37
   5   6   0 4484.37  399.38
   5   6   0 3320.12  294.03
  -5   6   0 4629.86  400.02
   5   6   0 4605.53  427.71
   5  -6   0 4339.36  427.43
   5  -6   0 4676.25  378.80
  -5  -6   0 4681.85  427.74
  -5  -6   0 4448.12  406.95
   5  -6   0 4439.13  421.30
   5  -6   0 4144.28  473.29
  -5  -6   0 4451.57  374.73
  -5   6  -1  -19.95   44.40
   5   6   1   20.45   36.03
   5   6   1   21.00   70.09
   5   6   1    3.93   12.30
  -5   6  -1   22.02   35.92
   5  -6   1   56.08   62.79
  -5  -6  -1   23.93   47.23
   5  -6   1    7.62   49.52
   5  -6   1    5.10   25.62
  -5  -6  -1   11.72   19.28
  -5  -6  -1   17.95   41.19
   5  -6   1   32.05   17.41
  -5   6  -2 5871.43  436.16
   5   6   2 5670.65  449.87
   5   6   2 5091.73  421.14
  -5   6  -2 6065.23  501.79
   5   6   2 6065.82  467.89
  -5  -6  -2 4931.65  397.05
   5  -6   2 6003.29  449.80
   5  -6   2 4837.92  442.73
   5  -6   2 5523.88  477.95
  -5  -6  -2 6282.82  489.31
   5  -6   2 5551.66  428.44
  -5  -6  -2 5680.44  429.54
   5   6   3   41.88   43.11
   5   6   3   65.80   42.88
  -5   6  -3   52.44   30.57
  -5   6  -3   48.26   62.91
   5   6   3   46.97   41.24
  -5  -6  -3   40.73   39.46
   5  -6   3    8.25   40.67
   5  -6   3   44.31   42.58
  -5  -6  -3   39.32   41.73
   5  -6   3   53.11   56.11
   5  -6   3   -4.59   51.01
  -5   6  -4 2251.05  181.26
  -5   6  -4 2857.84  229.32
   5   6   4 2231.55  136.95
   5   6   4 2077.88  300.54
   5   6   4 2728.84  195.33
  -5  -6  -4 2743.65  160.64
  -5  -6  -4 2664.41  175.27
   5  -6   4 2800.04  727.95
   5  -6   4 2382.56  199.95
   5  -6   4 2609.69  398.66
   5   6   5  125.49   65.80
   5   6   5   91.42   59.91
   5   6   5  134.46   50.42
  -5   6  -5  142.06   48.31
   5  -6   5   60.50   43.32
   5  -6   5  143.28   55.98
  -5  -6  -5  101.29   65.63
   5  -6   5  146.48   54.66
  -5  -6  -5  115.36   34.39
  -5   6  -6  477.15  175.31
   5   6   6  521.59  181.27
   5   6   6  504.49  148.74
   5   6   6  401.17  214.54
  -5  -6  -6  452.77  188.96
  -5  -6  -6  537.62  266.26
   5  -6   6  496.30  247.15
   5  -6   6  397.93  261.41
   5   6   7   31.02   34.00
  -5   6  -7    4.46   13.59
   5   6   7   -1.26   27.93
   5   6   7   28.24   23.43
   5  -6   7   18.68   54.18
   5  -6   7   13.77   59.20
  -5  -6  -7   -0.26   11.57
  -5  -6  -7   31.33   43.65
   5   6   8  831.59  441.45
   5   6   8 1003.24  313.53
   5   6   8 1078.81  244.33
  -5   6  -8 1159.41  205.64
   5  -6   8 1019.00  287.17
  -5  -6  -8 1021.67  339.10
  -5  -6  -8   12.71   18.98
   5  -6   8 1048.49  555.84
   5   6   9   66.71   81.45
   5   6   9   33.71   41.86
  -5   6  -9   95.44   46.32
   5  -6   9   78.70   58.77
   5  -6   9   45.44   53.09
  -5  -6  -9   61.01   43.10
  -5   6 -10 2318.58  878.03
   5   6  10 1513.49  297.92
   5  -6  10 1210.42  715.30
   5  -6  10 1562.15  409.96
  -5   6 -11   18.77   18.81
   5   6  11   20.42   42.71
   5  -6  11   25.46   60.37
   5  -6  11  -31.31   84.59
  -5   6 -12  696.04  279.50
   5   6  12  717.48  561.76
   5  -6  12 1000.16  573.92
   5  -6  12  688.56  546.21
   5  -6  13   -7.49   75.21
   5  -7 -13  299.28  185.17
   5   7 -12   14.38   18.33
   5  -7 -12    0.29   80.75
  -5   7  11  223.43  189.72
   5   7 -11  520.15  173.65
   5   7 -11  412.83  196.84
   5  -7 -11  371.73  285.33
  -5  -7  11  330.92  234.02
   5   7 -10   26.67   22.75
   5   7 -10   88.67   65.18
  -5   7  10   20.39   40.03
   5  -7 -10   53.44   81.84
  -5  -7  10   51.31   70.68
   5   7  -9  609.92  257.72
   5   7  -9  575.06  318.39
  -5   7   9  432.05  312.38
   5  -7  -9  579.10  397.95
  -5  -7   9  430.61  332.20
  -5   7   8    2.38   21.00
   5   7  -8   54.58   44.51
   5   7  -8   50.42   47.97
  -5  -7   8   39.01   50.94
   5  -7  -8  -34.45   70.98
   5   7  -7  683.92  329.03
  -5   7   7  366.54  285.22
   5   7  -7  755.60  385.92
  -5  -7   7  564.57  457.82
   5  -7  -7  784.73  334.69
   5   7  -6  197.91  107.89
   5   7  -6  150.08   88.43
  -5   7   6   87.26   47.72
   5  -7  -6   90.84   97.44
  -5  -7   6   79.67   57.84
   5  -7  -6  100.72   66.08
  -5   7   5  590.36  247.11
   5   7  -5  779.13  340.31
   5   7  -5  843.78  233.53
  -5  -7   5  591.79  283.53
   5  -7  -5  832.45  525.71
   5  -7  -5  946.99  300.09
   5   7  -4  389.96  113.29
  -5   7   4  343.69  150.97
   5   7  -4  326.89  143.44
  -5  -7   4  315.58  204.16
   5  -7  -4  343.21  184.62
   5  -7  -4  328.19  161.65
   5   7  -3 1013.32  420.28
  -5   7   3  947.38  174.56
   5   7  -3  896.49  240.34
   5  -7  -3 1010.69  148.94
   5  -7  -3  773.65   93.40
   5  -7  -3  856.91  385.85
   5  -7  -3 1034.90  123.69
  -5  -7   3  946.59  417.43
  -5  -7   3  971.28  514.69
  -5   7   2  183.10  106.33
   5   7  -2  154.50   86.35
   5   7  -2  195.43   82.47
  -5  -7   2  198.63   90.67
   5  -7  -2  104.98   57.10
  -5  -7   2  172.34   76.84
   5  -7  -2  152.89   85.54
   5  -7  -2  143.87   76.14
   5   7  -1 1198.24  300.32
  -5   7   1 1187.56  212.24
   5   7  -1 1186.95  487.56
   5  -7  -1 1135.14  228.96
   5  -7  -1 1097.24  195.96
  -5  -7   1 1245.73  329.44
   5  -7  -1 1072.51  439.84
  -5  -7   1 1284.36  599.46
   5   7   0  347.35   90.34
   5   7   0  156.94  122.86
   5   7   0  152.45  128.82
  -5   7   0  286.54  125.84
   5  -7   0  263.97  178.30
   5  -7   0  242.34  111.09
   5  -7   0  225.81   91.80
  -5  -7   0  276.53  153.12
  -5  -7   0  218.13   74.09
  -5   7  -1 1058.06  225.94
   5   7   1  689.40  361.36
   5   7   1  993.52  453.57
   5   7   1  743.18  474.03
   5  -7   1  901.45  351.37
  -5  -7  -1 1024.12  499.44
   5  -7   1  879.31  279.29
  -5  -7  -1 1032.83  504.56
   5  -7   1  859.97  338.57
   5   7   2    4.31   18.91
   5   7   2   53.86   50.71
   5   7   2   12.49   34.20
  -5   7  -2   38.66   36.29
   5  -7   2    8.40   24.78
   5  -7   2   10.26   58.27
   5  -7   2   13.08   39.88
  -5  -7  -2   31.82   55.06
  -5  -7  -2   39.26   52.88
  -5   7  -3 1505.46  313.49
   5   7   3  955.50  214.72
   5   7   3 1378.42  319.98
   5   7   3 1380.96  324.78
   5  -7   3 1096.34  466.48
  -5  -7  -3 1408.49  285.37
   5  -7   3 1415.04  254.95
   5  -7   3 1268.82  426.38
  -5  -7  -3 1636.79  231.45
   5   7   4   61.93   46.55
  -5   7  -4   17.56   21.98
   5   7   4   37.68   60.84
   5   7   4    2.86   17.58
   5  -7   4    6.90   22.81
  -5  -7  -4   43.54   54.04
   5  -7   4   -2.97   64.95
   5  -7   4   -2.29   62.92
  -5  -7  -4   29.83   57.60
   5   7   5  586.46  348.27
  -5   7  -5  695.38  155.94
   5   7   5  858.49  335.31
   5  -7   5  512.36  308.83
  -5  -7  -5  601.26  286.84
   5  -7   5  552.15  351.90
  -5  -7  -5    7.76   12.80
   5   7   6   32.74   27.72
   5   7   6    6.94   24.73
   5   7   6   -6.56   55.31
  -5   7  -6   11.24   15.06
   5  -7   6    9.98   48.39
   5  -7   6   40.67   57.11
  -5  -7  -6    1.03   11.25
  -5  -7  -6    7.99   44.73
   5   7   7 1262.58  260.09
   5   7   7 1492.54  156.95
  -5   7  -7 1017.44  132.46
  -5  -7  -7 1258.91  316.78
   5  -7   7 1446.52  450.14
   5  -7   7 1026.10  549.36
   5   7   8   11.04   37.91
  -5   7  -8   28.34   23.13
  -5  -7  -8   31.06   31.02
   5  -7   8   38.52   30.91
   5  -7   8   31.21   70.03
   5   7   9 1222.95  201.39
  -5   7  -9 1139.11  490.56
   5  -7   9  685.36  677.03
   5  -7   9 1227.68  610.82
   5   7  10   89.19   72.48
  -5   7 -10   36.29   77.16
   5  -7  10   -7.52   77.43
   5  -7  10   35.22   53.56
   5   7  11  423.60  337.37
  -5   7 -11  861.85  541.65
   5  -7  11  407.38  615.99
   5  -7  11  644.48  468.76
   5  -7  12   53.54   33.74
   5  -7  13  -15.57   93.47
   5   8 -12   35.09   49.60
   5   8 -11   11.93   22.28
   5  -8 -11  -31.50  115.07
   5   8 -10  425.08  413.61
   5   8 -10  454.57  274.71
  -5   8  10  373.39  347.19
   5  -8 -10  362.53  233.29
  -5   8   9  133.20  207.44
   5   8  -9   -5.70   75.91
   5   8  -9   28.60   28.76
  -5  -8   9   -4.78   65.13
   5  -8  -9   -5.63   97.23
  -5   8   8  317.66  285.72
   5   8  -8  473.25  220.11
   5   8  -8  446.02  257.20
   5  -8  -8  589.17  262.98
  -5  -8   8  476.87  353.42
   5   8  -7  955.90  243.77
   5   8  -7  736.32  437.76
  -5   8   7  833.22  256.29
  -5  -8   7  702.62  598.67
   5  -8  -7  925.68  554.67
   5   8  -6 1100.60  321.02
   5   8  -6  987.85  676.62
  -5   8   6 1248.33  260.76
  -5  -8   6 1170.88  481.82
   5  -8  -6 1045.15  653.37
   5   8  -5   -0.48   65.97
  -5   8   5   19.73   23.94
   5   8  -5    1.24   38.73
   5  -8  -5    7.07   70.16
  -5  -8   5  -11.36   80.60
   5   8  -4  767.39  446.70
   5   8  -4  712.17  363.97
  -5   8   4  535.15  336.38
  -5  -8   4  643.20  531.30
   5  -8  -4  625.63  445.53
   5   8  -3   47.81   68.33
  -5   8   3   75.96   69.57
   5   8  -3   57.22   54.34
   5  -8  -3    3.47    4.91
   5  -8  -3  128.26   91.37
  -5  -8   3   47.87   62.62
   5   8  -2  802.28  390.71
  -5   8   2  694.88  374.07
   5   8  -2  825.69  216.45
  -5  -8   2  772.95  430.36
  -5  -8   2  742.75  386.13
   5  -8  -2   14.50   20.03
   5  -8  -2  641.33  310.07
   5  -8  -2  877.89  414.45
   5   8  -1   55.42   36.16
  -5   8   1    7.22   30.39
   5   8  -1   59.33   29.13
  -5  -8   1   53.60   49.04
   5  -8  -1   11.33   52.75
   5  -8  -1   25.44   23.77
  -5  -8   1   39.19   54.64
   5  -8  -1    4.22   17.68
   5   8   0 1758.42  637.47
   5   8   0 1864.81  374.96
  -5  -8   0 1469.16  444.86
   5  -8   0 1804.62  812.70
  -5  -8   0 1486.27  614.00
   5  -8   0  -27.85   39.55
   5   8   1   19.30   28.42
   5   8   1    4.32   59.41
  -5   8  -1   10.08   73.35
  -5  -8  -1   -2.08   64.91
   5  -8   1   16.17   38.21
   5  -8   1   11.69   42.06
  -5  -8  -1  -11.38   57.29
   5  -8   1   35.81   25.07
  -5   8  -2  426.15  209.15
   5   8   2  352.80  182.18
   5   8   2  240.07  193.33
   5  -8   2  258.59   94.91
   5  -8   2  303.76  183.17
  -5  -8  -2   -7.23   44.61
   5  -8   2  268.30  202.02
  -5  -8  -2  288.59  183.99
   5   8   3   33.95   73.93
   5   8   3   23.30   41.79
  -5   8  -3   37.02   32.52
  -5  -8  -3   16.93   21.92
   5  -8   3   10.63   41.99
   5  -8   3   15.59   36.09
  -5  -8  -3   70.81   54.29
   5  -8   3   52.89   42.04
   5   8   4  424.67  367.11
  -5   8  -4  644.16  308.57
   5   8   4  485.78  261.34
   5   8   4  324.01  414.33
   5  -8   4  474.15  448.85
   5  -8   4  537.47  208.34
  -5  -8  -4  466.85  278.14
   5   8   5  338.99  152.16
  -5   8  -5  368.87  201.87
   5   8   5  150.16  140.48
   5   8   5  161.36  194.43
  -5  -8  -5  329.10  269.75
   5  -8   5  220.86  184.76
   5   8   6  422.84  316.37
  -5   8  -6  363.92  144.80
   5  -8   6  372.33  284.79
   5  -8   6  278.40  280.44
  -5  -8  -6  477.36  306.72
  -5   8  -7   -5.36   31.70
   5   8   7    8.92   35.70
  -5  -8  -7   28.86   44.38
   5  -8   7   30.05   25.26
   5  -8   7   45.92   42.61
   5   8   8  425.08  199.10
  -5   8  -8  472.01  267.87
   5  -8   8  363.93  372.38
   5  -8   8  588.30  504.57
   5   8   9   47.45   54.79
  -5   8  -9   55.44   44.45
   5  -8   9  100.10   77.44
   5  -8   9   70.22   88.53
   5  -8  10  259.40  201.56
   5   9 -10   -8.87   58.77
  -5   9   9  387.39  421.33
   5   9  -9  626.35  581.64
  -5   9   8   30.44   33.92
   5   9  -8  -15.35   67.58
   5   9  -8   39.64   35.10
   5  -9  -8  -18.59   57.50
  -5   9   7  222.23  207.14
   5   9  -7  470.06  278.75
   5   9  -7  461.98  296.81
  -5  -9   7  546.24  388.32
   5  -9  -7  476.74  402.48
   5   9  -6   -5.10   45.25
  -5   9   6   -0.34   27.08
   5   9  -6  -15.00   59.98
   5  -9  -6    7.33   49.31
  -5  -9   6   27.96   71.98
  -5   9   5   71.59   47.66
   5   9  -5   91.43   58.29
   5   9  -5  121.25  111.78
  -5  -9   5  116.70   90.33
   5  -9  -5   53.81   92.10
   5   9  -4   35.25   45.73
  -5   9   4    8.39   30.24
   5   9  -4    2.94   51.51
   5  -9  -4   58.72  103.27
  -5  -9   4   61.44   62.81
   5   9  -3  819.92  265.49
  -5   9   3  879.47  271.16
   5   9  -3  502.22  374.02
  -5  -9   3  620.95  470.72
   5  -9  -3  546.65  402.93
  -5   9   2   33.55   38.19
   5   9  -2   13.49   30.75
   5   9  -2    2.12   28.01
   5  -9  -2  -19.54   99.53
  -5  -9   2   14.95   29.57
  -5   9   1  485.28  333.08
   5   9  -1  265.97  235.70
   5   9  -1  465.00  251.66
   5  -9  -1  398.00  231.25
  -5  -9   1  441.71  278.61
  -5   9   0   23.10   28.93
   5   9   0   22.72   50.71
   5   9   0    1.95   36.39
   5  -9   0   27.87   33.59
  -5  -9   0   28.76   51.12
   5  -9   0   14.71   55.41
  -5   9  -1  380.43  169.68
   5   9   1  398.89  236.42
   5   9   1  236.36  243.78
   5  -9   1  337.72  200.40
  -5  -9  -1  426.50  284.16
   5  -9   1  303.47  181.22
   5   9   2   20.72   33.33
   5   9   2    3.62   33.60
  -5   9  -2   35.57   36.30
   5  -9   2  -24.59   56.02
  -5  -9  -2   29.07   59.36
   5  -9   2   46.13   74.91
  -5   9  -3  671.66  327.43
   5   9   3  569.84  277.44
   5  -9   3  654.85  332.99
  -5  -9  -3  684.48  306.40
   5  -9   3  640.21  514.53
   5   9   4   59.73   38.00
  -5   9  -4  100.51   62.78
  -5  -9  -4   84.60   40.67
   5  -9   4   96.52   98.72
   5  -9   4  100.83   68.83
   5   9   5  651.98  320.37
  -5   9  -5  541.84  368.16
   5  -9   5  474.36  478.69
  -5  -9  -5  508.01  337.85
   5  -9   5  417.12  321.44
   5   9   6   98.40   52.69
  -5   9  -6   53.85   27.88
  -5  -9  -6   65.12   67.00
   5  -9   6   66.34   80.93
   5  -9   6   29.42   65.49
   5  -9   7  428.07  503.30
   5  -9   7  429.36  374.81
   5  -9   8   35.28   63.80
  -5  10   8   49.36   93.58
  -5  10   7   29.77   39.20
   5  10  -7   22.03   36.60
  -5  10   6  340.01  388.32
   5  10  -6  395.59  371.00
   5  10  -5    2.96   30.61
  -5  10   5   14.83   42.96
   5  10  -5   41.04   57.94
   5  10  -4   44.57   33.03
   5  10  -4   71.15   76.92
  -5  10   4   75.41   48.27
  -5 -10   4   55.36   91.86
   5 -10  -4  103.75   99.48
  -5  10   3   -0.61   67.62
   5  10  -3   21.46   27.01
   5  10  -3   51.61   75.80
   5 -10  -3   42.03   72.02
  -5 -10   3  -14.63  100.43
  -5  10   2  482.44  304.75
   5  10  -2  285.15  338.40
   5  10  -2  340.50  236.73
   5 -10  -2  634.42  393.37
  -5 -10   2  618.96  495.40
   5  10  -1  146.19   97.81
  -5  10   1  187.50  194.17
   5  10  -1  184.03  105.45
   5 -10  -1   84.87   82.46
  -5 -10   1  235.24  149.61
   5  10   0  164.74   88.85
  -5  10   0  171.50   98.60
   5 -10   0  120.66  108.93
  -5 -10   0  114.38  128.63
   5  10   1    7.34   48.83
  -5  10  -1   41.13   73.11
   5 -10   1   12.62   78.87
  -5 -10  -1   -9.37   90.57
  -5  10  -2  382.38  200.60
   5  10   2  404.52  267.62
   5 -10   2  337.55  347.60
  -5 -10  -2  551.83  371.64
  -5 -10  -3   22.05   80.79
  -5 -10  -4  247.97  224.02
   5 -10   4  184.44  221.01
   5 -10   5  -32.82   60.89
  -5 -10  -5  -14.59   72.56
   5 -10   6  379.28  343.28
   5 -10   7   37.90   53.66
  -5 -11  -1  495.62  450.32
  -5 -11  -2   87.12   64.64
  -5 -11  -3  125.82  106.73
  -5 -11  -4   43.37   73.52
  -6   0  16  196.78  123.72
  -6   0  16  228.62  439.62
  -6   0  15   33.26   56.69
   6   0 -15    0.06   61.73
   6   0 -14 3847.73  271.85
  -6   0  14 3390.57  462.75
  -6   0  13   47.76   58.12
   6   0 -13   36.85   53.64
  -6   0  12  922.37  101.81
   6   0 -12 1121.63  487.72
  -6   0  12  888.98  444.83
  -6   0  11   11.77   50.28
  -6   0  11    6.62    5.52
   6   0 -11    4.04   24.00
  -6   0  11    1.35    2.17
   6   0 -10   41.10   42.60
  -6   0  10   51.63   49.28
  -6   0  10   73.46   41.27
  -6   0   9   -3.15   45.82
  -6   0   9   13.86   29.61
  -6   0   9    9.39   32.12
   6   0  -9   -1.92   48.82
  -6   0   8 1148.60  184.93
  -6   0   8 1137.11  383.42
  -6   0   8 1205.14  172.94
   6   0  -8 1117.88  382.18
  -6   0   7   26.42   26.44
  -6   0   7   -7.75   59.07
  -6   0   7   36.03   47.50
   6   0  -7   15.80   34.42
   6   0  -610890.49  812.75
  -6   0   615595.79  482.67
  -6   0   614062.64  420.08
  -6   0   614887.09  452.20
   6   0  -5   11.85   28.74
  -6   0   5   15.82   19.59
  -6   0   5  -12.95   47.65
  -6   0   5   21.80   40.17
  -6   0   4 2543.66  223.92
   6   0  -4 1968.82  154.22
  -6   0   4 2317.78  228.65
  -6   0   4 2423.28  213.47
  -6   0   3    5.95   34.37
   6   0  -3    4.67    5.18
   6   0  -3    0.36    5.21
   6   0  -3   16.07   23.61
  -6   0   3   27.63   41.47
  -6   0   2 5973.39  367.14
   6   0  -2 6193.42  380.17
   6   0  -2 5552.26  267.19
   6   0  -2 5565.81  279.00
  -6   0   2 6195.67  389.10
   6   0  -2 5734.05  368.60
   6   0  -1    8.16    5.84
  -6   0   1   -4.30    9.84
  -6   0   1   16.67   41.42
   6   0  -1   24.18   50.34
   6   0  -1   15.18   19.45
  -6   0   1    2.60   24.90
   6   0   016847.81  835.29
   6   0   016332.13  853.85
  -6   0   017346.08  855.56
  -6   0   017203.78  905.38
  -6   0   018122.14  873.45
   6   0   1    5.31    9.29
  -6   0  -1    8.29   24.12
   6   0   1   -1.00   27.43
  -6   0  -1   13.02   14.64
  -6   0  -1   -0.59   22.28
   6   0   1   11.49   17.77
  -6   0  -2   66.10   30.02
  -6   0  -2   59.67   17.80
  -6   0  -2   37.99   27.81
   6   0   2   -4.39   37.49
   6   0   2   15.55   13.20
   6   0   2   56.96   21.57
  -6   0  -3    4.72   12.86
   6   0   3   -1.18   16.37
   6   0   3   25.53   31.44
  -6   0  -3   10.99   20.58
   6   0   3    7.08   11.43
  -6   0  -3   27.86   27.86
  -6   0  -4 1947.07  153.61
  -6   0  -4 2455.08  216.80
   6   0   4 1943.33  155.70
  -6   0  -4 2068.37  263.24
   6   0   4 1499.95  125.76
   6   0   4 1895.90  198.38
  -6   0  -5   30.74   49.79
   6   0   5   -2.51   40.15
   6   0   5    1.81    6.88
  -6   0  -5   14.20   21.60
   6   0   5    8.82    7.92
   6   0   6 6069.49  500.53
   6   0   6 6506.84  457.80
   6   0   6 7309.68  543.85
  -6   0  -6 6571.82  516.37
  -6   0  -6 7612.03  579.31
   6   0   7   25.97   44.31
   6   0   7   -3.93   37.26
   6   0   7   -0.37    5.93
  -6   0  -7  -10.96   36.92
  -6   0  -7   30.38   17.98
   6   0   8  249.46   46.46
  -6   0  -8  440.17  128.82
   6   0   8  351.76  175.80
  -6   0  -8  353.52  162.92
   6   0   8 2376.10  896.92
   6   0   8  274.54   56.63
   6   0   9    5.21   10.39
   6   0   9   14.11   13.03
   6   0   9   13.03   27.67
  -6   0  -9   17.93   36.88
  -6   0  -9   34.29   28.58
   6   0  10 3520.24  403.47
   6   0  10 3459.34  395.63
   6   0  10 3496.05  497.47
  -6   0 -10 3268.45  403.05
   6   0  11   -0.57    8.21
   6   0  11   -0.95    7.77
   6   0  11  -10.74   64.48
  -6   0 -11    9.82   24.18
   6   0  12   22.35   67.57
   6   0  12  185.54  140.59
  -6   0 -12  171.95   96.78
  -6   0 -13    9.29   29.28
   6   0  13   -0.71   47.68
   6   0  14  476.44  236.28
   6   0  14  359.00  251.23
   6   0  15   24.66   67.54
   6   0  15    9.05   48.70
  -6   1  16   59.06  114.18
  -6  -1  16  135.72  145.20
  -6  -1  16  132.26  111.64
   6   1 -15  631.99  368.46
  -6   1  15  331.21  409.12
  -6   1  15  563.57  497.63
  -6  -1  15  427.54  420.26
  -6   1  14  218.55  286.91
   6   1 -14  283.82  161.94
   6  -1 -14  278.82  163.44
   6   1 -13 2734.70  466.23
  -6   1  13 2911.06  936.97
   6  -1 -13 2726.76  384.52
  -6  -1  13 2878.39  306.24
  -6   1  12  160.67   56.56
   6   1 -12  336.22  148.92
  -6   1  12  147.73   54.25
  -6   1  12  235.59  147.22
   6  -1 -12  193.88  134.89
  -6  -1  12  163.26   93.10
  -6  -1  12  384.25  188.51
  -6  -1  12  203.25   87.69
   6   1 -11 1118.72  504.58
  -6   1  11  797.22  300.88
  -6   1  11  875.54  551.98
  -6  -1  11 1046.82  177.19
  -6  -1  11  968.78  124.74
  -6  -1  11 1020.25  434.34
   6  -1 -11 1082.31  446.09
   6   1 -10  175.42   71.63
  -6   1  10  138.10  136.67
  -6   1  10  233.08  127.79
  -6  -1  10   65.50   83.38
  -6  -1  10   99.92   61.52
   6  -1 -10  186.04   75.63
  -6  -1  10  155.99   48.82
  -6  -1  10  284.90  109.83
   6   1  -9 1907.32  211.88
  -6   1   9 1932.51  383.88
  -6   1   9 1369.52  724.67
  -6   1   9 1710.29  266.06
  -6  -1   9 1316.75  517.70
  -6  -1   9 1841.09  133.14
   6  -1  -9 1795.54  204.98
  -6  -1   9 1949.84  643.35
  -6  -1   9 1677.66  302.24
  -6   1   8  253.41   90.81
   6   1  -8  226.22   86.81
   6   1  -8  193.50   39.07
  -6   1   8  194.14  170.23
  -6   1   8  245.54  103.19
  -6  -1   8   78.32   91.23
  -6  -1   8  209.52   93.53
  -6  -1   8  236.61   80.43
   6  -1  -8  241.37   94.85
  -6   1   7 4227.31  405.99
  -6   1   7 3854.31  491.77
   6   1  -7 3616.04  293.43
   6   1  -7 4896.59  292.15
  -6   1   7 4136.53  404.27
  -6  -1   7 4859.52  546.53
  -6  -1   7 4518.19  368.51
  -6  -1   7 4395.10  367.66
   6  -1  -7 3465.20  267.81
  -6  -1   7 4467.12  267.22
  -6   1   6 2387.09  796.16
   6   1  -6 1653.24  129.78
  -6   1   6 2061.23  222.78
   6   1  -6 1804.19  128.74
  -6  -1   6 2058.94  330.47
  -6  -1   6 2003.36  144.51
  -6  -1   6 2136.36  284.02
   6  -1  -6 2310.21  276.87
  -6  -1   6 2066.95  230.84
   6  -1  -6 1793.11  181.69
  -6   1   512910.71  960.19
   6   1  -512997.14  881.47
  -6   1   512366.80  918.48
   6   1  -515954.75 1206.53
  -6  -1   512740.54  959.13
  -6  -1   513171.38  982.80
   6  -1  -512262.02  928.07
  -6  -1   511533.38  857.28
   6  -1  -5 9516.10  698.47
  -6  -1   511507.59  781.55
  -6   1   4  357.00  138.31
  -6   1   4  443.57  144.73
   6   1  -4  391.59   38.20
   6   1  -4  361.87  170.29
  -6  -1   4  617.68  271.60
  -6  -1   4  375.63  219.34
   6  -1  -4  460.57  134.83
  -6  -1   4  418.12  156.98
   6  -1  -4  393.85  175.64
   6   1  -3 4200.12  215.33
   6   1  -3 3869.90  281.68
  -6   1   3 4609.30  310.90
  -6   1   3 4721.45  383.16
[truncated: 352,388 more chars]
