# Supplementary material
Source: MDPI journal article supplement (https://www.mdpi.com/2304-6740/9/2/10)
Supplement: s1 [file s1 › 2025901.cif]

####################################################################### 
# 
# This file contains crystal structure data downloaded from the 
# Cambridge Structural Database (CSD) hosted by the Cambridge 
# Crystallographic Data Centre (CCDC).
# 
# Full information about CCDC data access policies and citation 
# guidelines are available at http://www.ccdc.cam.ac.uk/access/V1 
# 
# Audit and citation data items may have been added by the CCDC. 
# Please retain this information to preserve the provenance of 
# this file and to allow appropriate attribution of the data. 
# 
#######################################################################

data_NiL2I3_200K
_audit_block_doi                 10.5517/ccdc.csd.cc2603n0
_database_code_depnum_ccdc_archive 'CCDC 2025901'
loop_
_audit_author_name
_audit_author_address
'Takayuki Ishida'
;The University of ElectroCommunications
Japan
;
_audit_update_record             
;
2020-08-28 deposited with the CCDC.	2020-11-11 downloaded from the CCDC.
;

#==============================================================================
# CHEMICAL DATA

_chemical_formula_sum            'C30 H34 I3 N4 Ni O2'
_chemical_formula_moiety         'C30 H34 N4 Ni O2, I3'
_chemical_formula_weight         922.04
_chemical_melting_point          ?

#==============================================================================
# CRYSTAL DATA
_space_group_crystal_system      triclinic
_space_group_name_H-M_alt        'P -1'
_space_group_name_Hall           '-P 1'
_space_group_IT_number           2
loop_
_space_group_symop_id
_space_group_symop_operation_xyz
1 +X,+Y,+Z
2 -X,-Y,-Z
#------------------------------------------------------------------------------
_cell_length_a                   11.828(3)
_cell_length_b                   11.963(4)
_cell_length_c                   12.703(4)
_cell_angle_alpha                111.438(14)
_cell_angle_beta                 100.692(13)
_cell_angle_gamma                91.250(14)
_cell_volume                     1636.2(9)
_cell_formula_units_Z            2
_cell_measurement_reflns_used    18412
_cell_measurement_theta_min      3.17
_cell_measurement_theta_max      27.52
_cell_measurement_temperature    200
#------------------------------------------------------------------------------
_exptl_crystal_description       Block
_exptl_crystal_colour            Blue
_exptl_crystal_size_max          0.134
_exptl_crystal_size_mid          0.085
_exptl_crystal_size_min          0.078
_exptl_crystal_density_diffrn    1.871
_exptl_crystal_density_meas      ?
_exptl_crystal_density_method    'not measured'
_exptl_crystal_F_000             890.00
_exptl_absorpt_coefficient_mu    3.457
_exptl_absorpt_correction_type   multi-scan
_exptl_absorpt_process_details   'REQAB (Rigaku, 1998)'
_exptl_absorpt_correction_T_min  0.589
_exptl_absorpt_correction_T_max  0.764

#==============================================================================
# EXPERIMENTAL DATA

_diffrn_ambient_temperature      200
_diffrn_radiation_type           'Mo K\a'
_diffrn_radiation_wavelength     0.71073
_diffrn_measurement_device_type  'Rigaku Saturn70'
_diffrn_measurement_method       \w
_diffrn_detector_area_resol_mean 29.412
_diffrn_reflns_number            27651
_diffrn_reflns_av_R_equivalents  0.0392
_diffrn_reflns_theta_max         27.484
_diffrn_reflns_theta_min         3.177
_diffrn_reflns_theta_full        25.242
_diffrn_measured_fraction_theta_max 0.986
_diffrn_measured_fraction_theta_full 0.988
_diffrn_reflns_Laue_measured_fraction_max 0.986
_diffrn_reflns_Laue_measured_fraction_full 0.988
_diffrn_reflns_point_group_measured_fraction_max 0.986
_diffrn_reflns_point_group_measured_fraction_full 0.988
_diffrn_reflns_limit_h_min       -15
_diffrn_reflns_limit_h_max       15
_diffrn_reflns_limit_k_min       -15
_diffrn_reflns_limit_k_max       15
_diffrn_reflns_limit_l_min       -16
_diffrn_reflns_limit_l_max       16
_diffrn_standards_number         0
_diffrn_standards_interval_count .
_diffrn_standards_decay_%        ?
_reflns_number_total             7418
_reflns_number_gt                5382
_reflns_threshold_expression     F^2^>2.0\s(F^2^)
_reflns_Friedel_coverage         0.000
_reflns_Friedel_fraction_max     .
_reflns_Friedel_fraction_full    .

#==============================================================================
# REFINEMENT DATA

_refine_special_details          
;
    Refinement was performed using all reflections. The weighted 
    R-factor (wR) and goodness of fit (S) are based on F^2^.
    R-factor (gt) are based on F. The threshold expression of
    F^2^ > 2.0 sigma(F^2^) is used only for calculating R-factor (gt).
;
_refine_ls_structure_factor_coef Fsqd
_refine_ls_R_factor_all          0.0562
_refine_ls_R_factor_gt           0.0330
_refine_ls_wR_factor_ref         0.0743
_refine_ls_wR_factor_gt          0.0670
_refine_ls_number_restraints     0
_refine_ls_hydrogen_treatment    constr
_refine_ls_number_reflns         7418
_refine_ls_number_parameters     361
_refine_ls_goodness_of_fit_ref   1.055
_refine_ls_weighting_scheme      calc
_refine_ls_weighting_details     
'w = 1/[\s^2^(Fo^2^)+(0.0239P)^2^+1.4449P] where P=(Fo^2^+2Fc^2^)/3'
_atom_sites_solution_hydrogens   geom
_atom_sites_solution_primary     direct
_atom_sites_solution_secondary   difmap
_refine_ls_shift/su_max          0.001
_refine_diff_density_max         0.95
_refine_diff_density_min         -0.91
_refine_ls_extinction_method     none
_refine_ls_extinction_coef       ?

loop_
_atom_type_symbol
_atom_type_description
_atom_type_scat_dispersion_real
_atom_type_scat_dispersion_imag
_atom_type_scat_source
C C 0.0033 0.0016
;
International Tables for Crystallography
(Vol. C, Tables 4.2.6.8 and 6.1.1.4)
;
H H 0.0000 0.0000
;
International Tables for Crystallography
(Vol. C, Table 6.1.1.4)
;
I I -0.4742 1.8119
;
International Tables for Crystallography
(Vol. C, Tables 4.2.6.8 and 6.1.1.4)
;
N N 0.0061 0.0033
;
International Tables for Crystallography
(Vol. C, Tables 4.2.6.8 and 6.1.1.4)
;
Ni Ni 0.3393 1.1124
;
International Tables for Crystallography
(Vol. C, Tables 4.2.6.8 and 6.1.1.4)
;
O O 0.0106 0.0060
;
International Tables for Crystallography
(Vol. C, Tables 4.2.6.8 and 6.1.1.4)
;

#==============================================================================
# ATOMIC COORDINATES AND THERMAL PARAMETERS

loop_
_atom_site_label
_atom_site_type_symbol
_atom_site_fract_x
_atom_site_fract_y
_atom_site_fract_z
_atom_site_U_iso_or_equiv
_atom_site_adp_type
_atom_site_occupancy
_atom_site_site_symmetry_order
_atom_site_calc_flag
_atom_site_refinement_flags_posn
_atom_site_refinement_flags_adp
_atom_site_refinement_flags_occupancy
_atom_site_disorder_assembly
_atom_site_disorder_group
I1 I 0.44441(2) 0.05882(3) 0.63941(2) 0.05914(9) Uani 1 1 d . . . . .
I2 I 0.29966(2) 0.13772(2) 0.80729(2) 0.04592(8) Uani 1 1 d . . . . .
I3 I 0.14807(2) 0.21898(2) 0.97962(2) 0.05492(9) Uani 1 1 d . . . . .
Ni1 Ni 0.63942(3) 0.29039(3) 0.51669(3) 0.02509(10) Uani 1 1 d . . . . .
O1 O 0.64367(16) 0.32326(19) 0.66757(16) 0.0300(5) Uani 1 1 d . . . . .
O2 O 0.64164(16) 0.26011(19) 0.36909(16) 0.0302(5) Uani 1 1 d . . . . .
N1 N 0.7390(2) 0.2914(2) 0.7229(2) 0.0278(6) Uani 1 1 d . . . . .
N2 N 0.7835(2) 0.2389(2) 0.54638(19) 0.0251(5) Uani 1 1 d . . . . .
N3 N 0.54471(19) 0.2845(2) 0.30713(19) 0.0270(5) Uani 1 1 d . . . . .
N4 N 0.49369(19) 0.3375(2) 0.48146(19) 0.0241(5) Uani 1 1 d . . . . .
C1 C 0.8171(2) 0.2441(3) 0.6564(2) 0.0254(6) Uani 1 1 d . . . . .
C2 C 0.9236(2) 0.2031(3) 0.6896(3) 0.0289(7) Uani 1 1 d . . . . .
H2 H 0.9465 0.2024 0.7651 0.035 Uiso 1 1 calc R U . . .
C3 C 0.9928(3) 0.1645(3) 0.6116(3) 0.0298(7) Uani 1 1 d . . . . .
H3 H 1.0651 0.1377 0.6341 0.036 Uiso 1 1 calc R U . . .
C4 C 0.9610(2) 0.1628(3) 0.4984(2) 0.0254(6) Uani 1 1 d . . . . .
C5 C 0.8535(2) 0.1990(3) 0.4709(2) 0.0282(7) Uani 1 1 d . . . . .
H5 H 0.8272 0.1956 0.3943 0.034 Uiso 1 1 calc R U . . .
C6 C 1.0371(3) 0.1287(3) 0.4141(3) 0.0306(7) Uani 1 1 d . . . . .
C7 C 1.1547(3) 0.1212(3) 0.4489(3) 0.0366(8) Uani 1 1 d . . . . .
H7 H 1.1858 0.1354 0.5277 0.044 Uiso 1 1 calc R U . . .
C8 C 1.2267(3) 0.0935(3) 0.3708(3) 0.0463(9) Uani 1 1 d . . . . .
H8 H 1.3063 0.0878 0.3961 0.056 Uiso 1 1 calc R U . . .
C9 C 1.1838(3) 0.0741(3) 0.2563(3) 0.0473(9) Uani 1 1 d . . . . .
H9 H 1.2341 0.0579 0.2033 0.057 Uiso 1 1 calc R U . . .
C10 C 1.0673(3) 0.0785(3) 0.2192(3) 0.0479(9) Uani 1 1 d . . . . .
H10 H 1.0369 0.0633 0.1401 0.058 Uiso 1 1 calc R U . . .
C11 C 0.9945(3) 0.1049(3) 0.2971(3) 0.0385(8) Uani 1 1 d . . . . .
H11 H 0.9144 0.1070 0.2705 0.046 Uiso 1 1 calc R U . . .
C12 C 0.7548(3) 0.3319(3) 0.8520(2) 0.0287(7) Uani 1 1 d . . . . .
C13 C 0.7643(3) 0.2224(3) 0.8858(3) 0.0438(8) Uani 1 1 d . . . . .
H13A H 0.7746 0.2485 0.9699 0.053 Uiso 1 1 calc R U . . .
H13B H 0.6935 0.1673 0.8484 0.053 Uiso 1 1 calc R U . . .
H13C H 0.8307 0.1808 0.8608 0.053 Uiso 1 1 calc R U . . .
C14 C 0.8626(3) 0.4211(3) 0.9078(3) 0.0446(9) Uani 1 1 d . . . . .
H14A H 0.8742 0.4484 0.9922 0.053 Uiso 1 1 calc R U . . .
H14B H 0.9299 0.3817 0.8825 0.053 Uiso 1 1 calc R U . . .
H14C H 0.8529 0.4906 0.8848 0.053 Uiso 1 1 calc R U . . .
C15 C 0.6497(3) 0.3935(3) 0.8874(3) 0.0434(9) Uani 1 1 d . . . . .
H15A H 0.6583 0.4206 0.9714 0.052 Uiso 1 1 calc R U . . .
H15B H 0.6424 0.4632 0.8644 0.052 Uiso 1 1 calc R U . . .
H15C H 0.5802 0.3366 0.8492 0.052 Uiso 1 1 calc R U . . .
C16 C 0.4623(2) 0.3243(3) 0.3680(2) 0.0248(6) Uani 1 1 d . . . . .
C17 C 0.3512(2) 0.3532(3) 0.3270(3) 0.0296(7) Uani 1 1 d . . . . .
H17 H 0.3275 0.3436 0.2483 0.036 Uiso 1 1 calc R U . . .
C18 C 0.2795(2) 0.3945(3) 0.4014(2) 0.0297(7) Uani 1 1 d . . . . .
H18 H 0.2056 0.4149 0.3740 0.036 Uiso 1 1 calc R U . . .
C19 C 0.3112(2) 0.4084(3) 0.5189(2) 0.0245(6) Uani 1 1 d . . . . .
C20 C 0.4195(2) 0.3785(3) 0.5532(2) 0.0263(6) Uani 1 1 d . . . . .
H20 H 0.4437 0.3871 0.6316 0.032 Uiso 1 1 calc R U . . .
C21 C 0.2322(2) 0.4491(3) 0.6005(2) 0.0267(6) Uani 1 1 d . . . . .
C22 C 0.1515(2) 0.5291(3) 0.5884(3) 0.0310(7) Uani 1 1 d . . . . .
H22 H 0.1469 0.5569 0.5268 0.037 Uiso 1 1 calc R U . . .
C23 C 0.0780(3) 0.5685(3) 0.6646(3) 0.0389(8) Uani 1 1 d . . . . .
H23 H 0.0239 0.6235 0.6553 0.047 Uiso 1 1 calc R U . . .
C24 C 0.0831(3) 0.5280(3) 0.7548(3) 0.0414(8) Uani 1 1 d . . . . .
H24 H 0.0334 0.5558 0.8078 0.050 Uiso 1 1 calc R U . . .
C25 C 0.1614(3) 0.4468(3) 0.7663(3) 0.0388(8) Uani 1 1 d . . . . .
H25 H 0.1641 0.4172 0.8266 0.047 Uiso 1 1 calc R U . . .
C26 C 0.2355(3) 0.4085(3) 0.6909(3) 0.0326(7) Uani 1 1 d . . . . .
H26 H 0.2896 0.3537 0.7006 0.039 Uiso 1 1 calc R U . . .
C27 C 0.5356(2) 0.2355(3) 0.1789(2) 0.0265(6) Uani 1 1 d . . . . .
C28 C 0.4454(3) 0.1273(3) 0.1237(3) 0.0325(7) Uani 1 1 d . . . . .
H28A H 0.4390 0.0948 0.0397 0.039 Uiso 1 1 calc R U . . .
H28B H 0.4684 0.0651 0.1543 0.039 Uiso 1 1 calc R U . . .
H28C H 0.3705 0.1522 0.1414 0.039 Uiso 1 1 calc R U . . .
C29 C 0.5061(3) 0.3361(3) 0.1334(3) 0.0372(8) Uani 1 1 d . . . . .
H29A H 0.5000 0.3047 0.0495 0.045 Uiso 1 1 calc R U . . .
H29B H 0.4323 0.3646 0.1514 0.045 Uiso 1 1 calc R U . . .
H29C H 0.5672 0.4032 0.1703 0.045 Uiso 1 1 calc R U . . .
C30 C 0.6529(3) 0.1965(3) 0.1548(3) 0.0365(8) Uani 1 1 d . . . . .
H30A H 0.6489 0.1640 0.0712 0.044 Uiso 1 1 calc R U . . .
H30B H 0.7113 0.2662 0.1919 0.044 Uiso 1 1 calc R U . . .
H30C H 0.6742 0.1342 0.1858 0.044 Uiso 1 1 calc R U . . .

loop_
_atom_site_aniso_label
_atom_site_aniso_U_11
_atom_site_aniso_U_22
_atom_site_aniso_U_33
_atom_site_aniso_U_23
_atom_site_aniso_U_13
_atom_site_aniso_U_12
I1 0.05191(16) 0.06421(19) 0.06184(18) 0.02923(14) 0.00268(13) -0.00305(13)
I2 0.04568(14) 0.04338(14) 0.04604(14) 0.02432(11) -0.01180(11) -0.00168(10)
I3 0.04816(16) 0.05940(18) 0.04980(16) 0.02016(13) -0.00728(11) 0.00919(12)
Ni1 0.02092(19) 0.0354(2) 0.02011(18) 0.01206(16) 0.00314(15) 0.00684(15)
O1 0.0236(10) 0.0454(13) 0.0241(10) 0.0164(10) 0.0048(8) 0.0112(9)
O2 0.0218(10) 0.0467(13) 0.0240(10) 0.0156(10) 0.0036(8) 0.0109(9)
N1 0.0250(13) 0.0381(15) 0.0215(12) 0.0134(11) 0.0024(10) 0.0091(11)
N2 0.0224(12) 0.0327(14) 0.0203(11) 0.0098(10) 0.0047(10) 0.0067(10)
N3 0.0202(12) 0.0419(15) 0.0186(11) 0.0120(11) 0.0019(10) 0.0083(11)
N4 0.0214(12) 0.0291(13) 0.0215(12) 0.0089(10) 0.0042(10) 0.0029(10)
C1 0.0243(15) 0.0290(16) 0.0237(14) 0.0113(13) 0.0040(12) 0.0021(12)
C2 0.0271(15) 0.0313(17) 0.0261(15) 0.0113(13) -0.0015(13) 0.0058(13)
C3 0.0233(15) 0.0306(17) 0.0327(16) 0.0108(13) 0.0010(13) 0.0054(13)
C4 0.0221(14) 0.0251(15) 0.0276(15) 0.0086(12) 0.0042(12) 0.0029(12)
C5 0.0294(16) 0.0317(17) 0.0227(15) 0.0096(13) 0.0050(13) 0.0032(13)
C6 0.0276(16) 0.0262(16) 0.0378(17) 0.0103(14) 0.0099(14) 0.0036(13)
C7 0.0272(17) 0.0344(18) 0.0446(19) 0.0093(15) 0.0108(15) 0.0029(13)
C8 0.0340(19) 0.038(2) 0.065(3) 0.0119(18) 0.0197(18) 0.0033(15)
C9 0.047(2) 0.040(2) 0.060(2) 0.0128(18) 0.036(2) 0.0039(17)
C10 0.057(2) 0.049(2) 0.038(2) 0.0106(17) 0.0231(18) 0.0065(18)
C11 0.0330(18) 0.047(2) 0.0356(18) 0.0130(16) 0.0131(15) 0.0071(15)
C12 0.0302(16) 0.0371(18) 0.0190(14) 0.0105(13) 0.0052(12) 0.0048(13)
C13 0.050(2) 0.052(2) 0.0412(19) 0.0287(17) 0.0139(17) 0.0094(17)
C14 0.045(2) 0.043(2) 0.0330(18) 0.0006(16) 0.0060(16) -0.0036(16)
C15 0.051(2) 0.057(2) 0.0266(16) 0.0171(16) 0.0147(16) 0.0191(18)
C16 0.0228(15) 0.0288(16) 0.0211(14) 0.0085(12) 0.0021(12) 0.0015(12)
C17 0.0277(16) 0.0405(18) 0.0221(14) 0.0145(13) 0.0021(12) 0.0080(13)
C18 0.0196(14) 0.0385(18) 0.0288(16) 0.0121(14) 0.0007(12) 0.0050(13)
C19 0.0215(14) 0.0260(15) 0.0255(14) 0.0084(12) 0.0060(12) 0.0034(12)
C20 0.0268(16) 0.0285(16) 0.0225(14) 0.0083(12) 0.0051(12) 0.0040(12)
C21 0.0233(15) 0.0265(16) 0.0264(15) 0.0054(13) 0.0053(12) 0.0025(12)
C22 0.0248(15) 0.0333(17) 0.0323(16) 0.0096(14) 0.0056(13) 0.0025(13)
C23 0.0254(16) 0.0382(19) 0.046(2) 0.0073(16) 0.0094(15) 0.0054(14)
C24 0.0322(18) 0.048(2) 0.0389(19) 0.0061(16) 0.0169(15) 0.0024(16)
C25 0.0399(19) 0.041(2) 0.0344(17) 0.0104(15) 0.0138(15) -0.0017(15)
C26 0.0335(17) 0.0327(17) 0.0311(16) 0.0111(14) 0.0072(14) 0.0038(14)
C27 0.0278(15) 0.0342(17) 0.0177(13) 0.0094(12) 0.0057(12) 0.0022(13)
C28 0.0352(17) 0.0328(17) 0.0271(15) 0.0089(14) 0.0054(13) 0.0008(14)
C29 0.0456(19) 0.0419(19) 0.0301(16) 0.0201(15) 0.0087(15) 0.0054(15)
C30 0.0293(16) 0.052(2) 0.0253(16) 0.0104(15) 0.0075(13) 0.0037(15)

#==============================================================================
_computing_data_collection       PROCESS-AUTO
_computing_cell_refinement       PROCESS-AUTO
_computing_data_reduction        PROCESS-AUTO
_computing_structure_solution    'Superflip (Palatinus, et al., 2007)'
_computing_structure_refinement  'SHELXL Version 2014/7 (Sheldrick, 2008)'
_computing_publication_material  'CrystalStructure 4.2.1 (Rigaku, 2016)'
_computing_molecular_graphics    'CrystalStructure 4.2.1'

#==============================================================================
# MOLECULAR GEOMETRY

_geom_special_details            
;
 All esds (except the esd in the dihedral angle between two l.s. planes)
 are estimated using the full covariance matrix.  The cell esds are taken
 into account individually in the estimation of esds in distances, angles
 and torsion angles; correlations between esds in cell parameters are only
 used when they are defined by crystal symmetry.  An approximate (isotropic)
 treatment of cell esds is used for estimating esds involving l.s. planes.
;

loop_
_geom_bond_atom_site_label_1
_geom_bond_atom_site_label_2
_geom_bond_distance
_geom_bond_site_symmetry_2
_geom_bond_publ_flag
I1 I2 2.8850(8) . ?
I2 I3 2.9882(8) . ?
Ni1 O2 1.780(2) . ?
Ni1 O1 1.801(2) . ?
Ni1 N2 1.845(2) . ?
Ni1 N4 1.852(2) . ?
O1 N1 1.353(3) . ?
O2 N3 1.366(3) . ?
N1 C1 1.361(4) . ?
N1 C12 1.504(4) . ?
N2 C5 1.345(4) . ?
N2 C1 1.358(4) . ?
N3 C16 1.344(4) . ?
N3 C27 1.497(4) . ?
N4 C20 1.353(4) . ?
N4 C16 1.369(4) . ?
C1 C2 1.409(4) . ?
C2 C3 1.360(4) . ?
C2 H2 0.9500 . ?
C3 C4 1.411(4) . ?
C3 H3 0.9500 . ?
C4 C5 1.377(4) . ?
C4 C6 1.476(4) . ?
C5 H5 0.9500 . ?
C6 C7 1.394(4) . ?
C6 C11 1.397(4) . ?
C7 C8 1.380(5) . ?
C7 H7 0.9500 . ?
C8 C9 1.379(5) . ?
C8 H8 0.9500 . ?
C9 C10 1.380(5) . ?
C9 H9 0.9500 . ?
C10 C11 1.385(5) . ?
C10 H10 0.9500 . ?
C11 H11 0.9500 . ?
C12 C15 1.516(4) . ?
C12 C13 1.520(4) . ?
C12 C14 1.522(4) . ?
C13 H13A 0.9800 . ?
C13 H13B 0.9800 . ?
C13 H13C 0.9800 . ?
C14 H14A 0.9800 . ?
C14 H14B 0.9800 . ?
C14 H14C 0.9800 . ?
C15 H15A 0.9800 . ?
C15 H15B 0.9800 . ?
C15 H15C 0.9800 . ?
C16 C17 1.418(4) . ?
C17 C18 1.354(4) . ?
C17 H17 0.9500 . ?
C18 C19 1.416(4) . ?
C18 H18 0.9500 . ?
C19 C20 1.373(4) . ?
C19 C21 1.482(4) . ?
C20 H20 0.9500 . ?
C21 C22 1.394(4) . ?
C21 C26 1.396(4) . ?
C22 C23 1.382(5) . ?
C22 H22 0.9500 . ?
C23 C24 1.390(5) . ?
C23 H23 0.9500 . ?
C24 C25 1.385(5) . ?
C24 H24 0.9500 . ?
C25 C26 1.380(5) . ?
C25 H25 0.9500 . ?
C26 H26 0.9500 . ?
C27 C28 1.517(4) . ?
C27 C30 1.523(4) . ?
C27 C29 1.536(4) . ?
C28 H28A 0.9800 . ?
C28 H28B 0.9800 . ?
C28 H28C 0.9800 . ?
C29 H29A 0.9800 . ?
C29 H29B 0.9800 . ?
C29 H29C 0.9800 . ?
C30 H30A 0.9800 . ?
C30 H30B 0.9800 . ?
C30 H30C 0.9800 . ?

loop_
_geom_angle_atom_site_label_1
_geom_angle_atom_site_label_2
_geom_angle_atom_site_label_3
_geom_angle
_geom_angle_site_symmetry_1
_geom_angle_site_symmetry_3
_geom_angle_publ_flag
I1 I2 I3 179.539(10) . . ?
O2 Ni1 O1 177.54(9) . . ?
O2 Ni1 N2 93.60(9) . . ?
O1 Ni1 N2 84.47(9) . . ?
O2 Ni1 N4 84.69(9) . . ?
O1 Ni1 N4 97.27(9) . . ?
N2 Ni1 N4 177.86(10) . . ?
N1 O1 Ni1 114.31(16) . . ?
N3 O2 Ni1 115.09(16) . . ?
O1 N1 C1 114.7(2) . . ?
O1 N1 C12 116.5(2) . . ?
C1 N1 C12 127.9(2) . . ?
C5 N2 C1 120.1(2) . . ?
C5 N2 Ni1 126.20(19) . . ?
C1 N2 Ni1 113.66(19) . . ?
C16 N3 O2 113.9(2) . . ?
C16 N3 C27 129.3(2) . . ?
O2 N3 C27 115.0(2) . . ?
C20 N4 C16 120.0(2) . . ?
C20 N4 Ni1 127.38(19) . . ?
C16 N4 Ni1 112.62(18) . . ?
N2 C1 N1 112.7(2) . . ?
N2 C1 C2 119.6(3) . . ?
N1 C1 C2 127.6(3) . . ?
C3 C2 C1 118.7(3) . . ?
C3 C2 H2 120.6 . . ?
C1 C2 H2 120.6 . . ?
C2 C3 C4 122.2(3) . . ?
C2 C3 H3 118.9 . . ?
C4 C3 H3 118.9 . . ?
C5 C4 C3 115.5(3) . . ?
C5 C4 C6 120.9(3) . . ?
C3 C4 C6 123.5(3) . . ?
N2 C5 C4 123.6(3) . . ?
N2 C5 H5 118.2 . . ?
C4 C5 H5 118.2 . . ?
C7 C6 C11 117.6(3) . . ?
C7 C6 C4 121.1(3) . . ?
C11 C6 C4 121.3(3) . . ?
C8 C7 C6 121.1(3) . . ?
C8 C7 H7 119.4 . . ?
C6 C7 H7 119.4 . . ?
C9 C8 C7 120.5(3) . . ?
C9 C8 H8 119.8 . . ?
C7 C8 H8 119.8 . . ?
C8 C9 C10 119.5(3) . . ?
C8 C9 H9 120.3 . . ?
C10 C9 H9 120.3 . . ?
C9 C10 C11 120.2(3) . . ?
C9 C10 H10 119.9 . . ?
C11 C10 H10 119.9 . . ?
C10 C11 C6 121.1(3) . . ?
C10 C11 H11 119.5 . . ?
C6 C11 H11 119.5 . . ?
N1 C12 C15 108.2(2) . . ?
N1 C12 C13 109.3(3) . . ?
C15 C12 C13 109.2(3) . . ?
N1 C12 C14 108.4(2) . . ?
C15 C12 C14 109.7(3) . . ?
C13 C12 C14 111.9(3) . . ?
C12 C13 H13A 109.5 . . ?
C12 C13 H13B 109.5 . . ?
H13A C13 H13B 109.5 . . ?
C12 C13 H13C 109.5 . . ?
H13A C13 H13C 109.5 . . ?
H13B C13 H13C 109.5 . . ?
C12 C14 H14A 109.5 . . ?
C12 C14 H14B 109.5 . . ?
H14A C14 H14B 109.5 . . ?
C12 C14 H14C 109.5 . . ?
H14A C14 H14C 109.5 . . ?
H14B C14 H14C 109.5 . . ?
C12 C15 H15A 109.5 . . ?
C12 C15 H15B 109.5 . . ?
H15A C15 H15B 109.5 . . ?
C12 C15 H15C 109.5 . . ?
H15A C15 H15C 109.5 . . ?
H15B C15 H15C 109.5 . . ?
N3 C16 N4 113.7(2) . . ?
N3 C16 C17 127.1(3) . . ?
N4 C16 C17 119.2(3) . . ?
C18 C17 C16 119.2(3) . . ?
C18 C17 H17 120.4 . . ?
C16 C17 H17 120.4 . . ?
C17 C18 C19 122.0(3) . . ?
C17 C18 H18 119.0 . . ?
C19 C18 H18 119.0 . . ?
C20 C19 C18 116.1(3) . . ?
C20 C19 C21 121.2(3) . . ?
C18 C19 C21 122.7(3) . . ?
N4 C20 C19 123.5(3) . . ?
N4 C20 H20 118.2 . . ?
C19 C20 H20 118.2 . . ?
C22 C21 C26 118.0(3) . . ?
C22 C21 C19 120.6(3) . . ?
C26 C21 C19 121.4(3) . . ?
C23 C22 C21 121.1(3) . . ?
C23 C22 H22 119.4 . . ?
C21 C22 H22 119.4 . . ?
C22 C23 C24 120.2(3) . . ?
C22 C23 H23 119.9 . . ?
C24 C23 H23 119.9 . . ?
C25 C24 C23 119.3(3) . . ?
C25 C24 H24 120.4 . . ?
C23 C24 H24 120.4 . . ?
C26 C25 C24 120.4(3) . . ?
C26 C25 H25 119.8 . . ?
C24 C25 H25 119.8 . . ?
C25 C26 C21 121.0(3) . . ?
C25 C26 H26 119.5 . . ?
C21 C26 H26 119.5 . . ?
N3 C27 C28 109.1(2) . . ?
N3 C27 C30 108.1(2) . . ?
C28 C27 C30 109.7(3) . . ?
N3 C27 C29 109.0(2) . . ?
C28 C27 C29 112.4(2) . . ?
C30 C27 C29 108.5(3) . . ?
C27 C28 H28A 109.5 . . ?
C27 C28 H28B 109.5 . . ?
H28A C28 H28B 109.5 . . ?
C27 C28 H28C 109.5 . . ?
H28A C28 H28C 109.5 . . ?
H28B C28 H28C 109.5 . . ?
C27 C29 H29A 109.5 . . ?
C27 C29 H29B 109.5 . . ?
H29A C29 H29B 109.5 . . ?
C27 C29 H29C 109.5 . . ?
H29A C29 H29C 109.5 . . ?
H29B C29 H29C 109.5 . . ?
C27 C30 H30A 109.5 . . ?
C27 C30 H30B 109.5 . . ?
H30A C30 H30B 109.5 . . ?
C27 C30 H30C 109.5 . . ?
H30A C30 H30C 109.5 . . ?
H30B C30 H30C 109.5 . . ?

loop_
_geom_torsion_atom_site_label_1
_geom_torsion_atom_site_label_2
_geom_torsion_atom_site_label_3
_geom_torsion_atom_site_label_4
_geom_torsion
_geom_torsion_site_symmetry_1
_geom_torsion_site_symmetry_2
_geom_torsion_site_symmetry_3
_geom_torsion_site_symmetry_4
_geom_torsion_publ_flag
N2 Ni1 O1 N1 -2.96(19) . . . . ?
N4 Ni1 O1 N1 175.79(18) . . . . ?
N2 Ni1 O2 N3 179.08(19) . . . . ?
N4 Ni1 O2 N3 0.38(19) . . . . ?
Ni1 O1 N1 C1 2.2(3) . . . . ?
Ni1 O1 N1 C12 171.97(19) . . . . ?
O2 Ni1 N2 C5 1.7(3) . . . . ?
O1 Ni1 N2 C5 -176.8(3) . . . . ?
O2 Ni1 N2 C1 -178.4(2) . . . . ?
O1 Ni1 N2 C1 3.1(2) . . . . ?
Ni1 O2 N3 C16 -1.8(3) . . . . ?
Ni1 O2 N3 C27 -167.70(18) . . . . ?
O2 Ni1 N4 C20 179.5(3) . . . . ?
O1 Ni1 N4 C20 -2.0(3) . . . . ?
O2 Ni1 N4 C16 1.1(2) . . . . ?
O1 Ni1 N4 C16 179.6(2) . . . . ?
C5 N2 C1 N1 177.2(3) . . . . ?
Ni1 N2 C1 N1 -2.7(3) . . . . ?
C5 N2 C1 C2 -2.5(4) . . . . ?
Ni1 N2 C1 C2 177.6(2) . . . . ?
O1 N1 C1 N2 0.3(4) . . . . ?
C12 N1 C1 N2 -168.0(3) . . . . ?
O1 N1 C1 C2 -180.0(3) . . . . ?
C12 N1 C1 C2 11.7(5) . . . . ?
N2 C1 C2 C3 3.2(4) . . . . ?
N1 C1 C2 C3 -176.5(3) . . . . ?
C1 C2 C3 C4 -0.8(5) . . . . ?
C2 C3 C4 C5 -2.1(4) . . . . ?
C2 C3 C4 C6 176.1(3) . . . . ?
C1 N2 C5 C4 -0.6(4) . . . . ?
Ni1 N2 C5 C4 179.3(2) . . . . ?
C3 C4 C5 N2 2.9(4) . . . . ?
C6 C4 C5 N2 -175.4(3) . . . . ?
C5 C4 C6 C7 163.8(3) . . . . ?
C3 C4 C6 C7 -14.3(5) . . . . ?
C5 C4 C6 C11 -14.9(5) . . . . ?
C3 C4 C6 C11 167.0(3) . . . . ?
C11 C6 C7 C8 1.2(5) . . . . ?
C4 C6 C7 C8 -177.6(3) . . . . ?
C6 C7 C8 C9 0.9(5) . . . . ?
C7 C8 C9 C10 -2.2(5) . . . . ?
C8 C9 C10 C11 1.5(5) . . . . ?
C9 C10 C11 C6 0.6(5) . . . . ?
C7 C6 C11 C10 -1.9(5) . . . . ?
C4 C6 C11 C10 176.9(3) . . . . ?
O1 N1 C12 C15 4.2(4) . . . . ?
C1 N1 C12 C15 172.3(3) . . . . ?
O1 N1 C12 C13 123.1(3) . . . . ?
C1 N1 C12 C13 -68.8(4) . . . . ?
O1 N1 C12 C14 -114.8(3) . . . . ?
C1 N1 C12 C14 53.4(4) . . . . ?
O2 N3 C16 N4 2.7(4) . . . . ?
C27 N3 C16 N4 166.1(3) . . . . ?
O2 N3 C16 C17 -177.7(3) . . . . ?
C27 N3 C16 C17 -14.3(5) . . . . ?
C20 N4 C16 N3 179.1(3) . . . . ?
Ni1 N4 C16 N3 -2.3(3) . . . . ?
C20 N4 C16 C17 -0.5(4) . . . . ?
Ni1 N4 C16 C17 178.0(2) . . . . ?
N3 C16 C17 C18 -178.7(3) . . . . ?
N4 C16 C17 C18 0.8(4) . . . . ?
C16 C17 C18 C19 -0.9(5) . . . . ?
C17 C18 C19 C20 0.6(4) . . . . ?
C17 C18 C19 C21 -177.6(3) . . . . ?
C16 N4 C20 C19 0.3(4) . . . . ?
Ni1 N4 C20 C19 -178.0(2) . . . . ?
C18 C19 C20 N4 -0.3(4) . . . . ?
C21 C19 C20 N4 178.0(3) . . . . ?
C20 C19 C21 C22 149.9(3) . . . . ?
C18 C19 C21 C22 -31.9(4) . . . . ?
C20 C19 C21 C26 -30.4(4) . . . . ?
C18 C19 C21 C26 147.8(3) . . . . ?
C26 C21 C22 C23 0.9(4) . . . . ?
C19 C21 C22 C23 -179.4(3) . . . . ?
C21 C22 C23 C24 -0.4(5) . . . . ?
C22 C23 C24 C25 -0.8(5) . . . . ?
C23 C24 C25 C26 1.5(5) . . . . ?
C24 C25 C26 C21 -1.0(5) . . . . ?
C22 C21 C26 C25 -0.2(4) . . . . ?
C19 C21 C26 C25 -179.9(3) . . . . ?
C16 N3 C27 C28 -57.5(4) . . . . ?
O2 N3 C27 C28 105.8(3) . . . . ?
C16 N3 C27 C30 -176.7(3) . . . . ?
O2 N3 C27 C30 -13.5(3) . . . . ?
C16 N3 C27 C29 65.5(4) . . . . ?
O2 N3 C27 C29 -131.2(3) . . . . ?

#==============================================================================

_shelx_res_file                  
;

    shelxl.res created by SHELXL-2014/7


TITL User-defined
CELL  0.71073 11.82770 11.96340 12.70330 111.438 100.692 91.250
ZERR  2 0.00340 0.00410 0.00400 0.014 0.013 0.014
LATT 1
SFAC C H I N NI O
UNIT 60 68 6 8 2 4
L.S. 20
FMAP 2
PLAN -48
WPDB -2
BOND $H
CONF
LIST 4
TEMP -73.0
ACTA
SIZE 0.134 0.085 0.078
REM HTAB
HTAB
WGHT    0.023900    1.444900
FVAR       0.92684
I1    3    0.444406    0.058824    0.639414    11.00000    0.05191    0.06421 =
         0.06184    0.02923    0.00268   -0.00305
I2    3    0.299662    0.137725    0.807286    11.00000    0.04568    0.04338 =
         0.04604    0.02432   -0.01180   -0.00168
I3    3    0.148067    0.218980    0.979618    11.00000    0.04816    0.05940 =
         0.04980    0.02016   -0.00728    0.00919
NI1   5    0.639421    0.290390    0.516691    11.00000    0.02092    0.03538 =
         0.02011    0.01206    0.00314    0.00684
O1    6    0.643668    0.323258    0.667570    11.00000    0.02360    0.04542 =
         0.02406    0.01640    0.00477    0.01119
O2    6    0.641642    0.260110    0.369090    11.00000    0.02180    0.04675 =
         0.02405    0.01561    0.00357    0.01086
N1    4    0.738959    0.291428    0.722886    11.00000    0.02497    0.03809 =
         0.02152    0.01343    0.00240    0.00911
N2    4    0.783539    0.238883    0.546380    11.00000    0.02245    0.03272 =
         0.02030    0.00978    0.00475    0.00670
N3    4    0.544710    0.284534    0.307131    11.00000    0.02024    0.04189 =
         0.01861    0.01200    0.00186    0.00831
N4    4    0.493686    0.337523    0.481464    11.00000    0.02136    0.02906 =
         0.02145    0.00891    0.00424    0.00291
C1    1    0.817138    0.244119    0.656373    11.00000    0.02427    0.02904 =
         0.02366    0.01130    0.00404    0.00205
C2    1    0.923576    0.203096    0.689649    11.00000    0.02713    0.03130 =
         0.02605    0.01133   -0.00150    0.00576
AFIX  43
H2    2    0.946529    0.202414    0.765134    11.00000   -1.20000
AFIX   0
C3    1    0.992814    0.164496    0.611610    11.00000    0.02334    0.03063 =
         0.03268    0.01081    0.00096    0.00537
AFIX  43
H3    2    1.065056    0.137749    0.634138    11.00000   -1.20000
AFIX   0
C4    1    0.960994    0.162830    0.498359    11.00000    0.02205    0.02514 =
         0.02759    0.00857    0.00417    0.00288
C5    1    0.853453    0.199019    0.470868    11.00000    0.02938    0.03174 =
         0.02266    0.00960    0.00500    0.00319
AFIX  43
H5    2    0.827206    0.195631    0.394308    11.00000   -1.20000
AFIX   0
C6    1    1.037097    0.128682    0.414065    11.00000    0.02764    0.02621 =
         0.03784    0.01030    0.00990    0.00356
C7    1    1.154674    0.121223    0.448855    11.00000    0.02724    0.03443 =
         0.04464    0.00932    0.01078    0.00289
AFIX  43
H7    2    1.185761    0.135444    0.527660    11.00000   -1.20000
AFIX   0
C8    1    1.226664    0.093543    0.370795    11.00000    0.03400    0.03782 =
         0.06471    0.01185    0.01974    0.00331
AFIX  43
H8    2    1.306332    0.087826    0.396122    11.00000   -1.20000
AFIX   0
C9    1    1.183803    0.074118    0.256288    11.00000    0.04736    0.03952 =
         0.06011    0.01285    0.03583    0.00395
AFIX  43
H9    2    1.234109    0.057862    0.203324    11.00000   -1.20000
AFIX   0
C10   1    1.067288    0.078469    0.219205    11.00000    0.05725    0.04880 =
         0.03832    0.01065    0.02314    0.00649
AFIX  43
H10   2    1.036900    0.063270    0.140060    11.00000   -1.20000
AFIX   0
C11   1    0.994539    0.104935    0.297063    11.00000    0.03303    0.04723 =
         0.03560    0.01304    0.01307    0.00714
AFIX  43
H11   2    0.914350    0.106974    0.270451    11.00000   -1.20000
AFIX   0
C12   1    0.754840    0.331866    0.852009    11.00000    0.03017    0.03709 =
         0.01897    0.01051    0.00518    0.00484
C13   1    0.764266    0.222409    0.885799    11.00000    0.05043    0.05154 =
         0.04119    0.02867    0.01393    0.00938
AFIX  33
H13A  2    0.774624    0.248526    0.969927    11.00000   -1.20000
H13B  2    0.693502    0.167291    0.848411    11.00000   -1.20000
H13C  2    0.830750    0.180847    0.860845    11.00000   -1.20000
AFIX   0
C14   1    0.862561    0.421103    0.907843    11.00000    0.04495    0.04270 =
         0.03302    0.00060    0.00603   -0.00357
AFIX  33
H14A  2    0.874185    0.448399    0.992155    11.00000   -1.20000
H14B  2    0.929911    0.381733    0.882543    11.00000   -1.20000
H14C  2    0.852927    0.490616    0.884771    11.00000   -1.20000
AFIX   0
C15   1    0.649650    0.393526    0.887396    11.00000    0.05073    0.05732 =
         0.02665    0.01705    0.01469    0.01908
AFIX  33
H15A  2    0.658322    0.420616    0.971441    11.00000   -1.20000
H15B  2    0.642443    0.463244    0.864389    11.00000   -1.20000
H15C  2    0.580203    0.336568    0.849230    11.00000   -1.20000
AFIX   0
C16   1    0.462251    0.324346    0.367960    11.00000    0.02275    0.02880 =
         0.02112    0.00852    0.00206    0.00152
C17   1    0.351246    0.353200    0.326986    11.00000    0.02767    0.04046 =
         0.02212    0.01446    0.00214    0.00799
AFIX  43
H17   2    0.327536    0.343638    0.248273    11.00000   -1.20000
AFIX   0
C18   1    0.279463    0.394544    0.401409    11.00000    0.01962    0.03849 =
         0.02877    0.01209    0.00069    0.00504
AFIX  43
H18   2    0.205586    0.414890    0.373978    11.00000   -1.20000
AFIX   0
C19   1    0.311224    0.408351    0.518864    11.00000    0.02153    0.02599 =
         0.02554    0.00842    0.00601    0.00339
C20   1    0.419508    0.378516    0.553234    11.00000    0.02682    0.02854 =
         0.02252    0.00829    0.00507    0.00401
AFIX  43
H20   2    0.443653    0.387119    0.631643    11.00000   -1.20000
AFIX   0
C21   1    0.232182    0.449050    0.600466    11.00000    0.02327    0.02651 =
         0.02640    0.00542    0.00533    0.00247
C22   1    0.151498    0.529067    0.588426    11.00000    0.02484    0.03326 =
         0.03234    0.00962    0.00557    0.00248
AFIX  43
H22   2    0.146928    0.556940    0.526816    11.00000   -1.20000
AFIX   0
C23   1    0.078037    0.568540    0.664608    11.00000    0.02543    0.03820 =
         0.04644    0.00727    0.00936    0.00538
AFIX  43
H23   2    0.023944    0.623495    0.655328    11.00000   -1.20000
AFIX   0
C24   1    0.083119    0.528022    0.754751    11.00000    0.03217    0.04801 =
         0.03890    0.00610    0.01690    0.00236
AFIX  43
H24   2    0.033420    0.555769    0.807839    11.00000   -1.20000
AFIX   0
C25   1    0.161409    0.446769    0.766347    11.00000    0.03989    0.04116 =
         0.03436    0.01037    0.01383   -0.00171
AFIX  43
H25   2    0.164139    0.417183    0.826642    11.00000   -1.20000
AFIX   0
C26   1    0.235513    0.408474    0.690879    11.00000    0.03349    0.03271 =
         0.03115    0.01107    0.00722    0.00378
AFIX  43
H26   2    0.289592    0.353676    0.700628    11.00000   -1.20000
AFIX   0
C27   1    0.535572    0.235469    0.178929    11.00000    0.02776    0.03421 =
         0.01772    0.00944    0.00570    0.00217
C28   1    0.445404    0.127300    0.123706    11.00000    0.03518    0.03282 =
         0.02706    0.00892    0.00543    0.00083
AFIX  33
H28A  2    0.439040    0.094781    0.039738    11.00000   -1.20000
H28B  2    0.468436    0.065087    0.154312    11.00000   -1.20000
H28C  2    0.370505    0.152174    0.141405    11.00000   -1.20000
AFIX   0
C29   1    0.506096    0.336100    0.133387    11.00000    0.04564    0.04189 =
         0.03007    0.02009    0.00869    0.00541
AFIX  33
H29A  2    0.499957    0.304687    0.049459    11.00000   -1.20000
H29B  2    0.432306    0.364644    0.151360    11.00000   -1.20000
H29C  2    0.567214    0.403189    0.170278    11.00000   -1.20000
AFIX   0
C30   1    0.652943    0.196501    0.154809    11.00000    0.02931    0.05210 =
         0.02530    0.01037    0.00748    0.00370
AFIX  33
H30A  2    0.648879    0.164022    0.071180    11.00000   -1.20000
H30B  2    0.711255    0.266219    0.191897    11.00000   -1.20000
H30C  2    0.674210    0.134191    0.185831    11.00000   -1.20000
AFIX   0
HKLF 4

REM  User-defined
REM R1 =  0.0330 for    5382 Fo > 4sig(Fo)  and  0.0562 for all    7418 data
REM    361 parameters refined using      0 restraints

END

WGHT      0.0239      1.4449

REM Instructions for potential hydrogen bonds
EQIV $1 x+1, y, z
HTAB C2 I3_$1
HTAB C5 O2
EQIV $2 -x+1, -y+1, -z+2
HTAB C14 I3_$2
HTAB C20 O1
EQIV $3 x, y, z-1
HTAB C28 I2_$3
HTAB C28 I3_$3
EQIV $4 -x+1, -y, -z+1
HTAB C30 I2_$4

REM Highest difference peak  0.947,  deepest hole -0.912,  1-sigma level  0.093
Q1    1   0.2630  0.1725  0.8541  11.00000  0.05    0.95
Q2    1   0.4881  0.3675  0.6777  11.00000  0.05    0.83
Q3    1   0.7863  0.2133  0.3523  11.00000  0.05    0.76
Q4    1   0.1151  0.2437  1.0223  11.00000  0.05    0.72
Q5    1  -0.0013 -0.2967  0.8511  11.00000  0.05    0.69
Q6    1   0.4086  0.0986  0.6877  11.00000  0.05    0.68
Q7    1   0.3999  0.0224  0.5345  11.00000  0.05    0.62
Q8    1   0.1553  0.1611  0.9659  11.00000  0.05    0.59
Q9    1   0.1748  0.2472  0.9579  11.00000  0.05    0.50
Q10   1   0.7595  0.4336  0.8691  11.00000  0.05    0.49
Q11   1   0.2393  0.5016  0.4060  11.00000  0.05    0.44
Q12   1   0.0451  0.0152  0.9006  11.00000  0.05    0.43
Q13   1   0.9020  0.3486  0.6969  11.00000  0.05    0.42
Q14   1   0.1057  0.5860  0.5704  11.00000  0.05    0.39
Q15   1   0.2750  0.4350  0.5625  11.00000  0.05    0.36
Q16   1   0.7869  0.2798  0.6920  11.00000  0.05    0.36
Q17   1   0.3169  0.0659  0.8660  11.00000  0.05    0.35
Q18   1   0.1418  0.6023  0.5014  11.00000  0.05    0.35
Q19   1   0.5006  0.3025  0.3366  11.00000  0.05    0.34
Q20   1   0.1395  0.3455  1.0578  11.00000  0.05    0.33
Q21   1   0.2223  0.6168  0.5671  11.00000  0.05    0.33
Q22   1   0.9996  0.1453  0.4524  11.00000  0.05    0.32
Q23   1   0.3414  0.3610  0.5209  11.00000  0.05    0.32
Q24   1   0.7166  0.3604  0.8893  11.00000  0.05    0.32
Q25   1   0.7570  0.2766  0.5206  11.00000  0.05    0.32
Q26   1   0.4568  0.3458  0.5133  11.00000  0.05    0.31
Q27   1  -0.0446 -0.3286  0.7556  11.00000  0.05    0.31
Q28   1   0.3570  0.0348  0.8183  11.00000  0.05    0.31
Q29   1   0.3965  0.1201  0.5502  11.00000  0.05    0.30
Q30   1   0.6185  0.5151  1.0445  11.00000  0.05    0.30
Q31   1   0.3983  0.1003  0.8490  11.00000  0.05    0.30
Q32   1   0.5549  0.3543  0.4905  11.00000  0.05    0.30
Q33   1   0.2242  0.0694  0.8327  11.00000  0.05    0.30
Q34   1   0.0620 -0.1358  0.8126  11.00000  0.05    0.30
Q35   1   0.1596  0.2035  1.0815  11.00000  0.05    0.30
Q36   1   0.3024  0.3472  0.3658  11.00000  0.05    0.29
Q37   1   0.4640  0.1748  0.6130  11.00000  0.05    0.29
Q38   1  -0.0978 -0.2000  0.8028  11.00000  0.05    0.29
Q39   1   0.3858  0.2249  0.8871  11.00000  0.05    0.28
Q40   1   0.1399  0.5637  0.6429  11.00000  0.05    0.28
Q41   1  -0.0651  0.3993  0.9985  11.00000  0.05    0.28
Q42   1   0.0579  0.2992  1.0111  11.00000  0.05    0.28
Q43   1   1.2366  0.1959  0.5767  11.00000  0.05    0.28
Q44   1   0.3602 -0.0412  0.5797  11.00000  0.05    0.28
Q45   1   0.5021  0.3838  0.7742  11.00000  0.05    0.28
Q46   1   0.3194  0.1158  0.6837  11.00000  0.05    0.28
Q47   1   0.7590  0.2871  0.8615  11.00000  0.05    0.28
Q48   1   0.5407  0.1817  0.9709  11.00000  0.05    0.28
;

_shelx_res_checksum              9857

_shelx_hkl_file                  
;
   0   0   2  350.89   10.73
   0   0   2  381.70   20.36
   0   0   2  343.13   16.89
   0   0  -2  380.81   13.92
   0   0  -2  366.33    9.51
   0   0  -2  395.18   21.76
   0   0   3  590.26   14.55
   0   0   3  541.73   22.11
   0   0   3  539.34   27.93
   0   0  -3  632.65   23.13
   0   0  -3  531.06   12.91
   0   0  -3  572.24   28.25
   0   0   4   32.09   15.87
   0   0   4   12.76   13.22
   0   0   4   26.28    5.44
   0   0  -4   17.56    8.44
   0   0  -4   24.97   16.24
   0   0  -4   46.45   14.43
   0   0   5 4703.00  130.71
   0   0   5 4697.01  155.95
   0   0   5 4532.46  170.70
   0   0  -5 4561.51  131.70
   0   0  -5 4800.47  157.46
   0   0  -5 4519.51  165.66
   0   0   621146.93 1256.80
   0   0   7 3197.70  115.87
   0   0   7 3168.22  154.41
   0   0   7 3242.49   93.99
   0   0  -7 3147.67  119.15
   0   0  -7 3352.40  153.34
   0   0  -7 3245.16   96.17
   0   0   8 1399.77   61.22
   0   0   8 1374.65   94.91
   0   0   8 1485.55   45.64
   0   0  -8 1408.39   86.34
   0   0  -8 1437.44   69.65
   0   0  -8 1376.31   48.01
   0   0   9  -20.51   39.75
   0   0   9   -0.79   12.12
   0   0   9   -3.04   21.00
   0   0  -9    7.06   13.97
   0   0  -9    2.09   23.78
   0   0  -9   -3.40   31.57
   0   0  10  628.68   51.79
   0   0  10  513.81   96.19
   0   0  10  731.15   33.96
   0   0 -10  913.11   74.78
   0   0 -10  753.90   59.03
   0   0 -10  628.78   37.55
   0   0  11  337.28   49.57
   0   0  11  465.08   33.60
   0   0 -11  443.50   30.57
   0   0 -11  500.75   59.33
   0   0 -11  452.62   65.13
   0   0  12   83.15   37.46
   0   0 -12   48.91   26.60
   0   0 -12   90.68   40.12
   0   0 -12   61.60   48.93
   0   0  13  263.45   54.80
   0   0 -13  202.36   53.84
   0   0 -13  307.36   38.62
   0   0  14  -16.84   42.68
   0   0 -14   16.67   57.12
   0   0 -14   22.85   30.70
   0   0  15  -48.11   50.13
   0   0 -15  -18.41   62.59
   0   0 -15    5.08   37.25
   0   1 -15  198.10   61.58
   0   1 -15  208.43   50.03
   0  -1  15  209.64   65.01
   0   1 -14  353.55   44.73
   0   1 -14  313.40   77.94
   0  -1  14  272.32   56.05
   0   1 -13 1636.88  139.03
   0   1 -13 1168.02  143.52
   0   1 -13 1713.14   83.93
   0  -1  13 1747.41  106.37
   0   1 -12 2381.90  102.85
   0   1 -12 2567.19  148.72
   0   1 -12 2050.40  127.27
   0  -1  12 2406.99  121.08
   0   1 -11   81.46   23.27
   0   1 -11   61.66   33.94
   0   1 -11   63.12   33.65
   0  -1  11   72.90   18.79
   0  -1  11   57.22   29.61
   0   1 -10   38.48   28.21
   0   1 -10   39.43   18.81
   0   1 -10   19.23   30.94
   0  -1  10   60.00   38.16
   0  -1  10   43.46   16.14
   0  -1  10   23.54   24.05
   0   1  -9  979.81   33.71
   0   1  -9 1017.56   72.99
   0   1  -9  979.76   54.22
   0  -1   9  870.42   68.01
   0  -1   9  942.43   48.21
   0  -1   9  919.81   34.02
   0   1  -8   31.72   19.28
   0   1  -8   23.97   23.27
   0   1  -8   38.92   13.84
   0  -1   8   33.28   11.24
   0  -1   8   27.35   17.39
   0  -1   8   53.59   25.33
   0   1  -716657.80  873.38
   0  -1   716924.60  903.06
   0  -1   717176.15  847.51
   0   1  -6   34.48   18.42
   0   1  -6   47.28   14.75
   0   1  -6   40.12   11.94
   0  -1   6   33.10    9.39
   0  -1   6   28.41   14.51
   0   1  -5 2908.04   97.24
   0   1  -5 2777.76   83.44
   0   1  -5 2985.85   79.42
   0  -1   5 2942.54   84.18
   0  -1   5 2882.28   68.03
   0  -1   5 2802.40  100.81
   0   1  -4 1296.32   30.00
   0   1  -4 1301.27   36.45
   0   1  -4 1333.01   43.69
   0  -1   4 1302.42   36.53
   0  -1   4 1302.04   45.96
   0  -1   4 1313.93   30.07
   0   1  -3  105.97   12.84
   0   1  -3   52.19    9.97
   0   1  -3   39.18    7.81
   0  -1   3   88.37   13.20
   0  -1   3   55.68    9.04
   0  -1   3   67.89    5.82
   0   1   2  385.22   27.61
   0   1   2  326.31   12.52
   0   1   2  344.92   18.58
   0  -1  -2  340.01   12.46
   0  -1  -2  381.50   17.88
   0  -1  -2  451.57   28.26
   0   1   3 2424.38   79.76
   0   1   3 2241.07   50.56
   0   1   3 2344.43   88.69
   0  -1  -3 2319.17   77.16
   0  -1  -3 2318.23   54.77
   0  -1  -3 2253.19   78.55
   0   1   4 1391.06   67.27
   0   1   4 1326.45   33.74
   0   1   4 1319.37   51.79
   0  -1  -4 1339.31   34.85
   0  -1  -4 1317.14   53.03
   0  -1  -4 1276.59   53.25
   0   1   512647.77  577.13
   0   1   513223.74  647.80
   0  -1  -512367.29  583.92
   0  -1  -513198.44  602.20
   0   1   6 7381.28  294.22
   0   1   6 7272.96  239.39
   0   1   6 7392.77  317.62
   0  -1  -6 7332.54  313.66
   0  -1  -6 7234.24  280.38
   0  -1  -6 7353.43  253.38
   0   1   7 1335.97   41.13
   0   1   7 1325.87   88.12
   0   1   7 1277.93   62.04
   0  -1  -7 1353.22   66.33
   0  -1  -7 1343.83   43.63
   0  -1  -7 1498.68   86.07
   0   1   8  124.03   12.56
   0   1   8  126.11   44.72
   0   1   8  127.95   29.31
   0  -1  -8  140.02   38.31
   0  -1  -8   93.28   31.72
   0  -1  -8  133.89   13.61
   0   1   9  594.34   62.72
   0   1   9  687.24   46.89
   0   1   9  594.19   24.36
   0  -1  -9  616.42   55.44
   0  -1  -9  498.09   51.73
   0  -1  -9  541.28   30.93
   0   1  10   49.65   40.49
   0   1  10    9.85   29.23
   0   1  10  -12.45   17.76
   0  -1 -10   12.17   34.84
   0  -1 -10  -40.42   31.25
   0  -1 -10  -15.26   18.21
   0   1  11 5279.66  263.98
   0   1  11 5602.43  227.43
   0  -1 -11 5425.77  278.83
   0  -1 -11 5286.66  198.87
   0  -1 -11 5341.35  278.30
   0  -1 -11 5404.25  326.59
   0   1  12   50.59   37.69
   0  -1 -12   34.44   39.97
   0  -1 -12   19.89   24.87
   0   1  13   29.35   43.05
   0  -1 -13   30.13   31.50
   0  -1 -13   41.99   46.96
   0   1  14  -47.91   47.89
   0  -1 -14   55.82   32.88
   0  -1 -14    0.10   48.93
   0   2 -15   69.19   49.19
   0   2 -15   98.50   39.85
   0  -2  15   47.10   46.88
   0   2 -14  170.60   39.02
   0   2 -14  141.30   50.36
   0  -2  14  111.83   42.23
   0   2 -13   19.95   29.22
   0   2 -13   85.16   37.45
   0   2 -13   36.07   51.65
   0  -2  13   63.80   34.59
   0   2 -12 2083.94   92.06
   0   2 -12 2164.31  119.41
   0   2 -12 1973.61  144.64
   0  -2  12 2038.36  103.60
   0  -2  12 2125.36   83.92
   0   2 -11   48.39   21.46
   0   2 -11   32.68   30.20
   0   2 -11  123.36   32.76
   0  -2  11   79.16   24.42
   0  -2  11   73.33   17.81
   0   2 -10  517.74   32.12
   0   2 -10  509.64   41.69
   0   2 -10  615.20   58.18
   0  -2  10  500.62   58.11
   0  -2  10  470.37   37.77
   0  -2  10  573.40   27.51
   0   2  -9  388.71   28.77
   0   2  -9  335.48   24.18
   0   2  -9  311.04   35.99
   0  -2   9  368.55   28.00
   0  -2   9  344.34   20.11
   0  -2   9  390.91   41.49
   0   2  -8   -0.62   13.16
   0   2  -8  -11.27   24.97
   0   2  -8    7.24   14.37
   0  -2   8    8.88   10.05
   0  -2   8    8.19   21.74
   0  -2   8   -5.85   14.56
   0   2  -7 6854.48  234.00
   0   2  -7 6346.45  251.73
   0   2  -7 6502.03  223.06
   0  -2   7 6342.56  204.50
   0  -2   7 6694.23  231.75
   0  -2   7 6143.23  251.05
   0   2  -5 8021.53  300.79
   0   2  -5 8169.64  273.52
   0   2  -5 8085.44  278.54
   0  -2   5 7963.33  264.25
   0  -2   5 8087.79  281.91
   0  -2   5 7912.82  300.75
   0  -2   4 9828.44  339.45
   0  -2   4 9819.94  393.67
   0   2  -3 1838.31   53.64
   0   2  -3 1663.76   48.62
   0   2  -3 1794.94   41.98
   0  -2   3 1933.87   50.89
   0  -2   3 1772.81   39.65
   0  -2   3 1853.20   71.82
   0   2   1  272.90   20.14
   0   2   1  194.13    9.90
   0  -2  -1  233.85   19.60
   0  -2  -1  186.80   25.36
   0  -2  -1  199.53    9.93
   0   2   3  149.08    8.87
   0   2   3  161.25   18.53
   0   2   3  177.15   25.93
   0  -2  -3  128.85   19.49
   0  -2  -3   92.24    8.52
   0  -2  -3  163.26   23.64
   0   2   413726.80  631.15
   0   2   413588.47  651.07
   0  -2  -413803.54  639.67
   0  -2  -413582.96  654.33
   0   2   5 1858.02   97.88
   0   2   5 1961.27   73.19
   0   2   5 1979.68   57.37
   0  -2  -5 1931.76   73.46
   0  -2  -5 1965.46   87.57
   0  -2  -5 2075.30   53.31
   0   2   6  853.82   26.07
   0   2   6  736.23   40.57
   0   2   6  874.08   68.24
   0  -2  -6  905.78   32.10
   0  -2  -6  875.72   46.52
   0  -2  -6  836.60   56.31
   0   2   7   12.18   33.66
   0   2   7   11.31   10.14
   0   2   7    9.92   18.59
   0  -2  -7    7.40   21.33
   0  -2  -7   27.06   32.58
   0  -2  -7    6.66   12.31
   0   2   8   26.09   15.42
   0   2   8   35.80   35.16
   0   2   8   41.99   28.58
   0  -2  -8   39.49   37.25
   0  -2  -8   44.59   15.47
   0  -2  -8   28.58   31.83
   0   2   9   51.27   19.10
   0   2   9   79.18   32.15
   0   2   9   50.09   41.97
   0  -2  -9   17.84   43.39
   0  -2  -9   51.34   17.91
   0  -2  -9   49.67   45.51
   0   2  10  643.78   62.15
   0   2  10  547.68   37.50
   0  -2 -10  575.47   82.31
   0  -2 -10  517.67   79.45
   0  -2 -10  565.62   38.13
   0   2  11  170.88   49.72
   0  -2 -11  180.13   30.86
   0  -2 -11  208.92   66.86
   0   2  12  728.15   80.59
   0  -2 -12  884.46   84.15
   0  -2 -12  773.31   53.50
   0   2  13  -13.12   46.45
   0  -2 -13   -4.66   28.41
   0  -2 -13   56.74   56.68
   0   2  14   12.52   56.68
   0  -2 -14   26.59   34.94
   0  -2 -14   33.43   74.59
   0   3 -15  171.46   56.83
   0   3 -15  133.68   72.95
   0   3 -15  187.80   36.49
   0   3 -14  108.25   39.41
   0   3 -14  113.73   45.20
   0   3 -13 1991.70  119.91
   0   3 -13 2173.28  101.33
   0  -3  13 2014.15  105.61
   0   3 -12  127.56   33.55
   0   3 -12  165.32   35.38
   0   3 -12  128.19   30.25
   0  -3  12  112.65   31.99
   0  -3  12  100.72   24.49
   0   3 -11   59.70   31.95
   0   3 -11  144.53   28.98
   0   3 -11   75.04   23.81
   0  -3  11   56.37   31.16
   0  -3  11   64.61   17.27
   0   3 -10   27.29   15.83
   0   3 -10   28.14   23.68
   0   3 -10   15.58   18.64
   0  -3  10   15.19   32.63
   0  -3  10   27.04   13.30
   0  -3  10   30.49   18.68
   0   3  -9  723.95   32.99
   0   3  -9  710.17   36.09
   0   3  -9  713.74   54.71
   0  -3   9  686.15   27.91
   0  -3   9  658.45   34.71
   0  -3   9  774.34   53.24
   0   3  -8 9948.73  398.10
   0   3  -8 9963.96  385.59
   0   3  -8 9100.77  404.93
   0  -3   8 9441.08  468.53
   0  -3   8 9443.43  358.44
   0   3  -7   32.72   16.96
   0   3  -7   48.27   15.35
   0   3  -7   56.05   13.33
   0   3  -7   28.59   24.52
   0  -3   7   36.80   19.80
   0  -3   7   17.33   10.85
   0   3  -6 2457.57   85.39
   0   3  -6 2510.64   70.70
   0   3  -6 2643.80   88.92
   0  -3   6 2651.88   89.72
   0  -3   6 2576.98   98.91
   0  -3   6 2540.45   64.13
   0   3  -5   26.51   10.29
   0   3  -5   42.11   17.07
   0   3  -5   28.34   14.89
   0  -3   5   14.99   17.82
   0  -3   5   31.09    9.27
   0  -3   5   42.33   13.47
   0   3  -4  285.08   18.60
   0   3  -4  267.75   25.23
   0  -3   4  300.66   31.47
   0  -3   4  286.35   15.83
   0  -3   4  269.99   12.35
   0  -3   4  281.94   17.78
   0   3  -3 3074.98   97.86
   0   3  -3 3337.56   92.04
   0   3  -3 3241.58  110.97
   0  -3   3 3433.65  107.20
   0  -3   3 3121.85   93.09
   0  -3   3 3249.11   91.69
   0   3  -2 1072.46   36.43
   0   3  -2 1092.02   44.27
   0   3  -2 1076.37   31.75
   0  -3   2 1016.42   35.52
   0  -3   2 1057.60   29.84
   0  -3   2 1034.15   42.06
   0   3   0 3532.80  101.19
   0   3   0 3656.72  103.69
   0   3   0 3481.47  115.32
   0  -3   0 3659.54   96.99
   0  -3   0 3580.32  119.22
   0  -3   0 3596.43   99.18
   0   3   1 3555.12   94.43
   0  -3  -1 3337.08   89.91
   0  -3  -1 3429.59  114.19
   0  -3  -1 3275.66  111.84
   0  -3  -1 3251.40   97.62
   0   3   2   41.21    9.38
   0   3   2  -15.36   17.18
   0   3   2   69.27   20.99
   0  -3  -2   32.53    8.62
   0  -3  -2   15.65   18.55
   0  -3  -2   50.67   17.60
   0   3   3  653.37   35.51
   0   3   3  640.98   21.14
   0   3   3  698.60   37.98
   0  -3  -3  721.19   43.00
   0  -3  -3  695.48   21.49
   0  -3  -3  785.41   49.36
   0   3   4 4115.96  158.98
   0   3   4 4069.59  127.56
   0   3   4 3947.58  147.40
   0  -3  -4 4370.96  163.43
   0  -3  -4 4118.55  117.98
   0  -3  -4 4102.00  165.17
   0   3   530329.82 2025.67
   0   3   530018.07 2057.80
   0  -3  -530066.40 2069.22
   0   3   6 1566.70   47.16
   0   3   6 1636.54   74.46
   0   3   6 1865.41  103.83
   0  -3  -6 1552.77   84.02
   0  -3  -6 1666.90   47.94
   0  -3  -6 1812.87   81.20
   0   3   7 1677.88  110.78
   0   3   7 1611.11   51.40
   0   3   7 1663.86   76.71
   0  -3  -7 1711.50   91.24
   0  -3  -7 1880.48   90.57
   0  -3  -7 1709.56   58.77
   0   3   8    2.21   16.60
   0   3   8   19.91   31.87
   0   3   8  -12.94   21.81
   0  -3  -8    7.02   14.70
   0  -3  -8   -0.37   29.05
   0  -3  -8   19.77   38.00
   0   3   9 1102.01   86.47
   0   3   9  752.83  125.12
   0   3   9 1022.98   50.73
   0  -3  -9 1026.54  103.96
   0  -3  -9  934.54   84.55
   0  -3  -9 1082.27   49.01
   0   3  10 2471.91  154.90
   0  -3 -10 2600.02  108.25
   0  -3 -10 2562.28  152.22
   0   3  11  341.85   65.85
   0  -3 -11  545.90   84.74
   0  -3 -11  425.03   39.83
   0   3  12  147.76   43.09
   0  -3 -12  206.59   54.27
   0  -3 -12   58.51   26.73
   0   3  13  165.66   64.40
   0  -3 -13   61.72   64.09
   0  -3 -13   61.85   64.22
   0  -3 -13  137.52   39.70
   0   4 -16    7.53   53.09
   0  -4  16  127.14   85.27
   0   4 -15  831.86  114.93
   0   4 -15 1203.72   92.51
   0  -4  15  619.64  146.25
   0   4 -14  604.70   67.20
   0   4 -14  653.37   88.13
   0  -4  14  464.61  113.42
   0   4 -13  684.44   71.79
   0   4 -13  505.61   60.66
   0  -4  13  241.64   90.36
   0   4 -12  602.84   54.35
   0   4 -12  805.90   57.47
   0   4 -12  733.75   55.77
   0  -4  12  543.01   94.29
   0  -4  12  693.38   29.95
   0   4 -11  609.43   38.33
   0   4 -11  641.90   52.23
   0   4 -11  615.47   49.55
   0  -4  11  512.35   29.78
   0  -4  11  531.36   76.94
   0   4 -10  688.88   40.23
   0   4 -10  794.33   60.83
   0   4 -10  705.47   52.23
   0  -4  10  684.38   25.68
   0  -4  10  572.52   73.66
   0  -4  10  802.67   76.11
   0   4  -9 1247.49   63.47
   0   4  -9 1459.61   52.25
   0   4  -9 1459.04   62.65
   0  -4   9 1354.96   39.08
   0  -4   9 1390.03   77.10
   0  -4   9 1260.42   68.04
   0   4  -814640.60  724.56
   0   4  -815448.88  701.11
   0   4  -814839.08  743.17
   0  -4   814734.61  756.10
   0  -4   814247.37  752.12
   0  -4   815213.70  672.50
   0   4  -7 1786.73   77.03
   0   4  -7 1690.38   64.69
   0   4  -7 1736.75   51.57
   0  -4   7 1802.87   48.29
   0  -4   7 1764.37   70.19
   0  -4   7 1897.98   81.01
   0   4  -6  682.03   39.39
   0   4  -6  643.04   39.10
   0   4  -6  625.44   23.09
   0  -4   6  683.86   34.11
   0  -4   6  652.24   20.74
   0  -4   6  740.84   48.69
   0   4  -5 2071.19   83.84
   0   4  -5 2093.84   76.07
   0  -4   5 2016.87   63.91
   0  -4   5 2100.23   60.70
   0  -4   5 2177.81   78.53
   0  -4   5 2069.70   68.07
   0   4  -4 3586.36  125.23
   0   4  -4 3506.02  104.33
   0   4  -4 3619.11  137.43
   0  -4   4 3480.38  111.79
   0  -4   4 3428.67  117.96
   0  -4   4 3392.31  105.57
   0   4  -3 6475.73  234.24
   0   4  -3 6375.71  211.40
   0   4  -3 6356.94  245.86
   0  -4   3 6569.74  215.32
   0  -4   3 6454.01  240.19
   0  -4   3 6419.45  227.90
   0   4  -1  575.73   26.21
   0   4  -1  563.23   22.87
   0   4  -1  641.05   33.70
   0  -4   1  619.66   21.35
   0  -4   1  514.84   25.93
   0  -4   1  645.32   35.65
   0   4   0 1019.46   33.06
   0   4   0 1111.42   36.37
   0   4   0 1107.48   49.60
   0  -4   0 1168.47   30.96
   0  -4   0 1088.60   49.50
   0  -4   0 1078.19   35.02
   0   4   1   84.71   12.95
   0   4   1  104.51   21.51
   0  -4  -1   99.54   23.13
   0  -4  -1  101.27   12.22
   0  -4  -1  108.49   12.03
   0  -4  -1   91.55   21.75
   0   4   2   26.63   10.76
   0   4   2   35.22   19.43
   0  -4  -2   38.58   12.28
   0  -4  -2   26.04   20.52
   0  -4  -2   37.34    9.93
   0  -4  -2   50.95   27.28
   0   4   3 9829.57  453.34
   0   4   3 9213.38  423.40
   0   4   3 9661.48  367.51
   0  -4  -310393.32  460.61
   0  -4  -3 9900.39  447.16
   0  -4  -3 9889.80  383.46
   0   4   4 1362.79   49.92
   0   4   4 1458.74   83.58
   0   4   4 1360.20   66.09
   0  -4  -4 1422.06   72.99
   0  -4  -4 1360.61   41.23
   0  -4  -4 1494.04   73.02
   0   4   5 3405.28  163.25
   0   4   5 3290.65  109.87
   0   4   5 3301.31  164.94
   0  -4  -5 3224.08  105.77
   0  -4  -5 3396.88  147.80
   0  -4  -5 3154.42  169.87
   0   4   6   20.25   15.61
   0   4   6    5.72   36.80
   0   4   6    4.12   21.24
   0  -4  -6   10.62   15.19
   0  -4  -6  -21.24   28.63
   0  -4  -6   36.88   28.20
   0   4   7   44.09   38.02
   0   4   7   23.60   35.74
   0   4   7   58.77   16.50
   0  -4  -7   96.84   14.06
   0  -4  -7   68.51   49.41
   0  -4  -7   57.06   37.53
   0   4   8   18.18   28.42
   0   4   8   44.34   18.10
   0   4   8   18.76   53.99
   0  -4  -8  110.54   38.23
   0  -4  -8  -12.18   40.56
   0  -4  -8   55.32   15.59
   0   4   9  385.34   56.09
   0  -4  -9  599.80   65.21
   0  -4  -9  590.60   38.54
   0   4  10 1774.37  127.55
   0  -4 -10 1712.56  152.79
   0  -4 -10 1636.98   66.39
   0   4  11  295.03   52.03
   0  -4 -11  310.86   37.60
   0  -4 -11  332.10   85.13
   0   4  12  -61.43   49.11
   0  -4 -12  112.87   63.89
   0  -4 -12  -14.22   26.74
   0   5 -16   13.31   42.40
   0  -5  16  -55.80   73.51
   0   5 -15  900.96   88.36
   0   5 -15 1061.06  102.33
   0  -5  15  863.05  152.77
   0   5 -14 1083.24   95.39
   0   5 -14  806.03   75.50
   0  -5  14  738.43  120.33
   0   5 -13  111.58   48.52
   0   5 -13   12.42   45.30
   0   5 -13  185.10   45.17
   0  -5  13   94.75   61.97
   0   5 -12    9.41   38.48
   0   5 -12   22.65   24.51
   0   5 -12   13.02   27.67
   0  -5  12   55.62   47.06
   0  -5  12   31.27   19.58
   0   5 -11    5.60   24.75
   0   5 -11   21.65   19.64
   0   5 -11    5.83   28.31
   0  -5  11   19.14   15.78
   0  -5  11    3.01   42.75
   0   5 -10  383.36   41.40
   0   5 -10  360.42   26.75
   0   5 -10  335.09   36.78
   0  -5  10  250.11   44.73
   0  -5  10  412.62   61.39
   0  -5  10  298.82   19.42
   0   5  -9 4566.78  192.69
   0   5  -9 4662.14  184.22
   0   5  -9 4726.88  155.96
   0  -5   9 4617.34  156.04
   0  -5   9 4437.79  196.28
   0  -5   9 4287.33  196.40
   0   5  -8  225.73   18.58
   0   5  -8  168.53   33.46
   0   5  -8  235.32   27.42
   0  -5   8  206.89   20.06
   0  -5   8  195.15   28.39
   0  -5   8  217.10   31.64
   0   5  -7 7262.22  249.07
   0   5  -7 7144.68  277.31
   0   5  -7 7297.87  306.55
   0  -5   7 7155.67  303.70
   0  -5   7 6871.21  235.43
   0  -5   7 7090.75  319.08
   0   5  -6   95.07   27.34
   0   5  -6   75.42   21.88
   0  -5   6   70.94   17.05
   0  -5   6   74.30   22.50
   0  -5   6   89.05   17.86
   0  -5   6   73.10   15.29
   0   5  -5  742.89   48.66
   0   5  -5  642.21   29.86
   0   5  -5  745.14   41.34
   0  -5   5  690.50   39.28
   0  -5   5  737.38   38.37
   0  -5   5  665.84   30.75
   0   5  -4 5602.42  227.94
   0   5  -4 5847.92  226.49
   0   5  -4 5684.87  192.20
   0  -5   4 5493.55  202.45
   0  -5   4 6045.23  197.32
   0  -5   4 5860.62  220.52
   0   5  -3 1441.35   54.10
   0   5  -3 1389.10   45.26
   0   5  -3 1325.30   63.76
   0  -5   3 1313.37   39.97
   0  -5   3 1347.13   49.94
   0  -5   3 1340.86   64.51
   0   5  -110432.39  474.88
   0   5  -1 9841.14  399.77
   0   5  -1 9995.46  391.12
   0  -5   1 9876.91  374.78
   0  -5   110144.21  445.83
   0  -5   1 9937.57  394.52
   0   5   0  749.87   30.38
   0   5   0  787.98   32.24
   0   5   0  778.10   45.38
   0  -5   0  751.42   57.40
   0  -5   0  732.47   30.04
   0  -5   0  737.46   25.89
   0   5   1 4687.40  183.62
   0   5   1 4929.85  157.07
   0  -5  -1 4786.79  159.95
   0  -5  -1 4749.47  149.46
   0  -5  -1 4887.15  195.74
   0  -5  -1 4759.44  183.75
   0   5   2  243.14   32.48
   0   5   2  340.01   24.60
   0  -5  -2  259.78   46.47
   0  -5  -2  308.10   44.08
   0  -5  -2  341.39   25.54
   0  -5  -2  257.73   18.14
   0   5   313574.82  686.99
   0   5   314219.77  633.45
   0  -5  -313633.43  741.05
   0  -5  -313318.00  590.84
   0  -5  -313774.13  753.25
   0  -5  -313548.34  642.64
   0   5   4 4977.45  204.43
   0   5   4 4870.48  207.56
   0   5   4 4695.02  159.56
   0  -5  -4 4500.32  207.38
   0  -5  -4 4636.84  214.96
   0  -5  -4 4663.29  164.27
   0   5   5  587.39   59.46
   0   5   5  491.87   45.17
   0   5   5  464.82   31.90
   0  -5  -5  556.48   54.36
   0  -5  -5  517.07   24.40
   0  -5  -5  397.77   53.55
   0   5   6   56.51   47.96
   0   5   6   76.68   30.32
   0   5   6  140.30   18.10
   0  -5  -6   78.53   15.32
   0  -5  -6  130.18   37.34
   0  -5  -6   50.97   38.67
   0   5   7  646.90   48.19
   0   5   7  759.67   59.01
   0   5   7  650.09   84.17
   0  -5  -7  650.82   30.69
   0  -5  -7  725.44   88.10
   0   5   8   27.95   33.08
   0  -5  -8   26.95   21.30
   0  -5  -8   82.96   51.10
   0   5   9 3259.88  207.74
   0  -5  -9 3640.95  149.06
   0  -5  -9 3676.04  261.04
   0   5  10   49.94   37.24
   0  -5 -10   -3.19   24.24
   0  -5 -10   -5.04   58.32
   0   5  11  -15.92   49.64
   0  -5 -11   16.95   25.90
   0  -5 -11  -64.98   62.14
   0   5  12    6.20   48.55
   0  -5 -12   30.62   57.47
   0  -5 -12    8.95   34.04
   0   6 -16  -11.76   55.31
   0  -6  16   59.50   73.69
   0   6 -15  149.50   64.64
   0  -6  15   99.30   79.60
   0   6 -14 3126.28  179.71
   0   6 -14 2602.76  160.18
   0  -6  14 2965.59  220.65
   0   6 -13    7.31   38.57
   0   6 -13  159.59   44.33
   0   6 -13  122.93   38.86
   0  -6  13  159.78   60.51
   0   6 -12  583.84   56.02
   0   6 -12  581.08   43.07
   0   6 -12  816.76   64.59
   0  -6  12  775.93   88.52
   0   6 -11   23.33   18.55
   0   6 -11   27.60   30.46
   0   6 -11    8.81   26.06
   0  -6  11   -9.05   43.81
   0  -6  11   34.10   15.00
   0   6 -10 1571.22   87.81
   0   6 -10 1467.52   54.78
   0   6 -10 1339.36   70.88
   0  -6  10 1388.90   80.56
   0  -6  10 1356.08   54.34
   0  -6  10 1353.48   87.29
   0   6  -9 6543.50  231.06
   0   6  -9 6982.98  297.69
   0   6  -9 6301.31  267.64
   0  -6   9 6117.95  229.99
   0  -6   9 6248.84  281.13
   0  -6   9 6502.75  320.90
   0   6  -8 4442.53  192.73
   0   6  -8 4823.72  199.70
   0   6  -8 4850.45  156.56
   0  -6   8 4611.85  222.76
   0  -6   8 4427.10  179.33
   0  -6   8 4547.01  144.82
   0   6  -7 1251.92   60.52
   0   6  -7 1225.76   50.41
   0  -6   7 1234.40   47.59
   0  -6   7 1218.92   77.28
   0  -6   7 1179.18   53.27
   0  -6   7 1277.66   55.36
   0   6  -6  395.14   26.81
   0   6  -6  568.27   37.42
   0   6  -6  524.74   39.42
   0  -6   6  313.16   34.73
   0  -6   6  516.03   36.18
   0  -6   6  416.11   27.48
   0   6  -5   34.32   22.18
   0   6  -5   41.20   26.02
   0   6  -5   55.02   19.87
   0  -6   5   52.08   22.57
   0  -6   5   57.73   15.63
   0  -6   5   33.34   19.56
   0   6  -4 9841.19  426.12
   0   6  -4 9494.36  379.97
   0   6  -4 9718.76  441.41
   0  -6   4 9465.91  402.57
   0  -6   4 9877.29  389.43
   0  -6   4 9628.39  427.94
   0   6  -325561.32 1609.97
   0  -6   325562.82 1481.76
   0  -6   325279.04 1610.49
   0   6  -2 2136.72   78.38
   0   6  -2 2015.94   65.45
   0   6  -2 1897.75   94.85
   0  -6   2 1963.38   59.43
   0  -6   2 1837.66   97.83
   0  -6   2 2099.57   71.75
   0   6  -1  170.54   17.74
   0   6  -1  172.97   19.65
   0   6  -1  124.38   35.71
   0  -6   1  157.32   18.63
   0  -6   1  177.98   19.21
   0  -6   1  168.42   36.24
   0   6   0 1878.11   81.40
   0   6   0 1830.34   75.46
   0   6   0 1962.22   78.32
   0  -6   0 1847.58   71.36
   0  -6   0 1895.03  102.39
   0  -6   0 1927.36   65.26
   0   6   1   87.31   16.36
   0   6   1   24.65   22.91
   0  -6  -1   23.25   25.12
   0  -6  -1   49.02   13.82
   0  -6  -1   13.33   26.99
   0  -6  -1   62.68   14.17
   0   6   2 4811.50  184.76
   0   6   2 4750.27  203.94
   0  -6  -2 5075.21  182.50
   0  -6  -2 4942.00  217.42
   0  -6  -2 5040.84  186.88
   0  -6  -2 5265.75  232.08
   0   6   3   62.01   29.55
   0   6   3   55.53   16.78
   0  -6  -3   43.06   15.74
   0  -6  -3   79.41   33.58
   0  -6  -3   54.01   42.13
   0  -6  -3   69.75   18.12
   0   6   4 5378.93  246.09
   0   6   4 5395.09  202.33
   0  -6  -4 5532.18  269.62
   0  -6  -4 5384.79  219.17
   0  -6  -4 5212.68  258.23
   0  -6  -4 5364.62  200.72
   0   6   5   22.47   32.63
   0   6   5   75.89   24.51
   0  -6  -5   67.94   16.17
   0  -6  -5  122.90   37.69
   0  -6  -5   51.48   41.38
   0  -6  -5   88.18   28.89
   0   6   6   61.56   32.20
   0   6   6   90.51   28.93
   0  -6  -6   80.34   51.51
   0  -6  -6   66.44   21.58
   0   6   7   97.26   63.28
   0   6   7  113.82   36.90
   0  -6  -7  108.80   50.92
   0  -6  -7  129.75   25.80
   0   6   8  -28.41   44.16
   0  -6  -8   22.60   17.90
   0  -6  -8   53.18   57.80
   0   6   9   98.26   47.41
   0  -6  -9  136.61   24.98
   0  -6  -9  140.32   75.98
   0   6  10  816.87  115.08
   0  -6 -10  962.79   64.56
   0  -6 -10 1068.14  145.83
   0   6  11  146.41   56.44
   0  -6 -11  138.51   93.73
   0  -6 -11  132.04   29.58
   0   7 -16  357.93   95.40
   0  -7  16  453.96  123.94
   0   7 -15  167.64   52.69
   0  -7  15  243.02   71.34
   0   7 -14   43.44   49.64
   0   7 -14   95.70   41.93
   0  -7  14   92.87   70.14
   0   7 -13  150.04   41.38
   0   7 -13   84.97   38.86
   0   7 -13  -12.53   33.69
   0  -7  13  143.57   57.93
   0   7 -12  -24.21   28.40
   0   7 -12   46.32   37.95
   0   7 -12   59.47   30.75
   0  -7  12   73.96   45.42
   0   7 -11    0.80   31.60
   0   7 -11   -2.10   23.80
   0   7 -11    5.32   17.56
   0  -7  11   17.36   19.52
   0  -7  11   18.18   30.85
   0   7 -10 5470.09  258.83
   0   7 -10 5823.10  208.15
   0   7 -10 5712.80  266.04
   0  -7  10 5403.55  258.23
   0  -7  10 5472.64  214.50
   0   7  -9 2270.02   99.83
   0   7  -9 2421.81  121.43
   0   7  -9 2650.03   87.80
   0  -7   9 2459.33  117.80
   0  -7   9 2561.23  114.99
   0  -7   9 2363.45   88.41
   0   7  -8 3942.26  176.81
   0   7  -8 3857.96  152.22
   0  -7   8 3905.55  193.54
   0  -7   8 4158.82  147.73
   0  -7   8 3986.49  158.22
   0   7  -7  161.18   31.79
   0   7  -7  207.49   24.25
   0   7  -7  263.34   48.28
   0  -7   7  129.42   24.07
   0  -7   7  225.80   30.14
   0  -7   7  156.59   38.76
   0   7  -6  580.69   32.91
   0   7  -6  673.02   49.31
   0   7  -6  641.16   50.89
   0  -7   6  780.91   36.40
   0  -7   6  663.54   42.96
   0  -7   6  689.42   45.50
   0   7  -5  211.28   35.74
   0   7  -5  243.57   32.23
   0   7  -5  271.02   22.46
   0  -7   5  234.12   33.69
   0  -7   5  230.38   29.23
   0  -7   5  202.75   21.16
   0   7  -4  208.12   21.13
   0   7  -4  116.27   36.03
   0   7  -4  148.29   37.38
   0  -7   4  193.07   23.92
   0  -7   4  198.76   24.08
   0  -7   4  173.00   35.39
   0   7  -320620.65 1171.22
   0   7  -320593.94 1215.21
   0  -7   319560.85 1080.43
   0  -7   320032.13 1062.76
   0  -7   320363.06 1210.66
   0   7  -2  -22.32   28.95
   0   7  -2   15.32   15.09
   0   7  -2   -3.55   18.15
   0  -7   2   14.88   12.52
   0  -7   2    4.76   15.56
   0   7  -1 2553.97  109.82
   0   7  -1 2579.85   87.92
   0   7  -1 2966.94  119.84
   0  -7   1 2610.63   82.66
   0  -7   1 2691.18   95.71
   0  -7   1 2592.54  124.19
   0   7   0   21.13   22.84
   0   7   0    7.77   23.20
   0   7   0   14.62   17.39
   0  -7   0   26.16   27.83
   0  -7   0   28.85   14.28
   0  -7   0    3.27   16.42
   0   7   1  370.29   34.34
   0   7   1  289.37   37.43
   0  -7  -1  293.53   38.38
   0  -7  -1  266.33   24.59
   0  -7  -1  369.53   45.22
   0  -7  -1  317.66   22.33
   0   7   2 3916.47  182.02
   0   7   2 4048.77  172.13
   0  -7  -2 4198.66  143.46
   0  -7  -2 3931.26  193.23
   0  -7  -2 4099.70  156.37
   0  -7  -2 3833.70  195.35
   0   7   3 6699.28  325.53
   0   7   3 6922.89  281.48
   0  -7  -3 6803.76  261.58
   0  -7  -3 7099.03  357.64
   0  -7  -3 6925.86  343.37
   0  -7  -3 6821.95  284.32
   0   7   4  442.55   44.24
   0   7   4  399.50   64.74
   0  -7  -4  546.03   61.28
   0  -7  -4  402.19   35.38
   0  -7  -4  454.86   29.18
   0  -7  -4  533.97   58.00
   0   7   5 1049.22   80.14
   0   7   5 1174.89   70.76
   0  -7  -5 1082.96   44.69
   0  -7  -5 1232.08  117.39
   0  -7  -5 1091.84   59.27
   0   7   6   -5.64   33.39
   0  -7  -6   64.35   52.31
   0  -7  -6   15.64   17.63
   0   7   7 1067.67   98.86
   0  -7  -7  877.55   45.05
   0  -7  -7  832.85  122.41
   0   7   8  103.85   50.80
   0  -7  -8  247.47   78.20
   0  -7  -8  162.22   26.96
   0   7   9  175.94   73.78
   0  -7  -9  172.63   27.89
   0  -7  -9   19.08   89.36
   0   7  10  193.31   65.22
   0  -7 -10  248.22   44.36
   0  -7 -10  204.19  110.36
   0  -8  16  991.64  169.02
   0   8 -15  286.08   57.85
   0  -8  15  327.33   92.33
   0   8 -14  351.73   66.29
   0  -8  14  372.62   91.88
   0   8 -13  339.05   44.76
   0   8 -13  139.94   50.55
   0  -8  13  179.54   77.75
   0   8 -12   -1.84   27.29
   0   8 -12   32.58   36.24
   0   8 -12   45.54   28.87
   0  -8  12   86.42   48.79
   0   8 -11  -31.16   34.45
   0   8 -11   40.90   25.83
   0   8 -11   18.65   18.16
   0  -8  11    8.11   40.37
   0   8 -10 9975.29  413.45
   0   8 -10 9582.72  487.04
   0   8 -10 9271.29  441.75
   0  -8  10 9427.12  423.64
   0  -8  10 9430.73  490.21
   0   8  -9  815.90   61.38
   0   8  -9  920.62   44.45
   0   8  -9  846.18   67.78
   0  -8   9  739.96   76.53
   0  -8   9  838.50   57.58
   0  -8   9  845.59   46.97
   0   8  -8  290.81   38.56
   0   8  -8  204.00   30.15
   0  -8   8  225.54   37.97
   0  -8   8  139.08   32.98
   0  -8   8  230.00   30.01
   0   8  -7  471.11   50.59
   0   8  -7  309.36   33.93
   0   8  -7  522.36   46.89
   0  -8   7  462.03   35.22
   0  -8   7  479.57   43.43
   0  -8   7  492.38   41.06
   0   8  -6   12.91   27.08
   0   8  -6    5.16   28.55
   0   8  -6   52.47   18.84
   0  -8   6   17.84   27.83
   0  -8   6   12.59   17.11
   0  -8   6   -7.00   20.96
   0   8  -5 2840.56  140.58
   0   8  -5 2956.80  110.82
   0   8  -5 3129.50  137.53
   0  -8   5 3017.73  105.88
   0  -8   5 3103.05  151.30
   0  -8   5 2885.05  118.11
   0   8  -4 6325.75  246.46
   0   8  -4 6131.32  288.48
   0   8  -4 6475.29  275.86
   0  -8   4 6007.21  242.22
   0  -8   4 6296.94  302.23
   0  -8   4 6366.84  258.12
   0   8  -3 1485.10   72.00
   0   8  -3 1426.10   93.34
   0   8  -3 1457.18   60.55
   0  -8   3 1451.66   55.17
   0  -8   3 1477.69   98.25
   0  -8   3 1556.89   66.70
   0   8  -2  164.00   32.67
   0   8  -2  256.17   28.66
   0   8  -2  122.17   21.98
   0  -8   2  172.83   39.07
   0  -8   2  182.69   18.45
   0  -8   2  113.03   22.35
   0   8  -1   10.63   18.01
   0   8  -1   20.59   25.75
   0   8  -1   24.12   20.97
   0  -8   1   13.51   38.37
   0  -8   1    0.36   13.51
   0  -8   1    1.59   17.05
   0   8   0  257.34   37.65
   0   8   0   75.07   26.39
   0  -8   0  165.42   36.99
   0  -8   0  213.24   19.64
   0  -8   0  241.52   42.97
   0  -8   0  171.50   23.12
   0   8   1 4610.92  181.99
   0   8   1 4577.48  211.16
   0  -8  -1 4594.19  165.88
   0  -8  -1 4696.01  174.22
   0  -8  -1 4485.87  244.84
   0  -8  -1 4513.12  242.73
   0   8   2  253.89   42.61
   0   8   2  189.87   31.06
   0  -8  -2  221.80   24.04
   0  -8  -2  283.30   74.80
   0  -8  -2  286.50   47.41
   0  -8  -2  247.47   33.77
   0   8   3 2036.67   95.04
   0   8   3 1881.23  110.01
   0  -8  -3 2094.75  128.11
   0  -8  -3 1871.70   83.70
   0  -8  -3 2001.26   83.82
   0   8   4  661.04   61.29
   0  -8  -4  765.85   68.68
   0  -8  -4  567.07   35.22
   0  -8  -4  475.58   50.58
   0   8   5  279.30   47.80
   0  -8  -5  267.33   55.52
   0  -8  -5  244.97   32.01
   0   8   6  196.08   49.25
   0  -8  -6  144.08   30.92
   0  -8  -6  191.61   57.80
   0   8   7  180.14   50.40
   0  -8  -7  137.68   27.93
   0  -8  -7  183.90   79.29
   0   8   8 1770.18  135.07
   0  -8  -8 1818.77  102.09
   0  -8  -8 1900.19  168.80
   0   8   9   23.15   59.63
   0  -8  -9   10.78   24.00
   0  -8  -9  -49.03   61.01
   0   9 -15  641.23   70.05
   0  -9  15  409.61  123.31
   0   9 -14   56.38   39.71
   0  -9  14   44.35   50.28
   0   9 -13  339.74   50.76
   0   9 -13  393.93   57.74
   0  -9  13  426.82   66.39
   0   9 -12  500.47   61.01
   0   9 -12  411.56   64.52
   0  -9  12  490.85   78.52
   0   9 -11  213.04   44.06
   0   9 -11   18.50   31.54
   0   9 -11  139.19   33.08
   0  -9  11  242.55   50.27
   0   9 -10  325.16   47.63
   0   9 -10  288.47   36.60
   0   9 -10  202.99   32.25
   0  -9  10  307.50   43.60
   0   9  -9 5226.97  256.36
   0   9  -9 4896.07  210.67
   0  -9   9 5287.96  219.36
   0  -9   9 5089.85  218.30
   0  -9   9 4870.19  256.64
   0   9  -8  265.84   46.81
   0   9  -8  243.84   29.69
   0   9  -8  166.63   50.17
   0  -9   8  193.90   35.18
   0  -9   8  192.42   37.99
   0  -9   8  124.63   32.75
   0   9  -7 1308.47   89.14
   0   9  -7 1264.81   74.11
   0   9  -7 1188.72   79.97
   0  -9   7 1325.34   70.33
   0  -9   7 1196.26   58.97
   0  -9   7 1231.98   78.85
   0   9  -6 1304.12   82.07
   0   9  -6 1248.46   82.61
   0   9  -6 1157.93   59.88
   0  -9   6 1281.43   59.33
   0  -9   6 1328.74   83.68
   0  -9   6 1461.83   89.01
   0   9  -5 1805.68   96.84
   0   9  -5 1558.64   96.06
   0   9  -5 1613.25   69.97
   0  -9   5 1630.86   76.35
   0  -9   5 1547.53   64.08
   0  -9   5 1253.32  103.03
   0   9  -4 6139.27  247.79
   0   9  -4 6336.66  280.93
   0   9  -4 5803.21  284.90
   0  -9   4 5840.02  311.69
   0  -9   4 5872.84  247.47
   0  -9   4 5864.83  223.41
   0   9  -3 1501.19   82.77
   0   9  -3 1545.81   83.88
   0   9  -3 1695.27   85.86
   0  -9   3 1551.67   71.35
   0  -9   3 1625.65   63.33
   0  -9   3 1695.83  100.83
   0   9  -2  274.30   45.33
   0   9  -2  219.62   37.07
   0   9  -2  346.70   41.34
   0  -9   2  201.64   29.05
   0  -9   2  238.13   51.52
   0  -9   2  232.14   23.20
   0   9  -1 1417.84   86.75
   0   9  -1 1500.04   71.86
   0   9  -1 1620.08   83.21
   0  -9   1 1575.47   67.71
   0  -9   1 1612.71   63.57
   0  -9   1 1403.01  131.90
   0   9   0   -6.59   24.46
   0   9   0    9.65   29.23
   0  -9   0   39.03   40.45
   0  -9   0    8.11   16.84
   0  -9   0    0.54   18.40
   0  -9   0   33.01   31.78
   0   9   1 5535.67  242.39
   0   9   1 5168.98  284.35
   0  -9  -1 5474.52  318.42
   0  -9  -1 5555.59  323.60
   0  -9  -1 5172.33  204.13
   0  -9  -1 5514.22  234.50
   0   9   2  937.91   74.86
   0  -9  -2  932.50   51.42
   0  -9  -2  973.36   87.82
   0  -9  -2  924.33   49.13
   0   9   3   45.09   39.77
   0  -9  -3   44.58   57.28
   0  -9  -3   36.25   24.71
   0  -9  -3   49.19   25.37
   0   9   4   -0.10   41.51
   0  -9  -4   95.09   53.02
   0  -9  -4  124.63   29.32
   0   9   5   82.79   44.13
   0  -9  -5   72.78   28.99
   0  -9  -5  102.11   69.95
   0   9   6  240.66   55.77
   0  -9  -6  267.70   96.36
   0  -9  -6  387.64   33.88
   0   9   7  617.67   82.96
   0  -9  -7  628.45  130.12
   0  -9  -7  537.53   59.46
   0   9   8   31.18   51.84
   0  -9  -8   29.27   28.06
   0  -9  -8  264.47   71.93
   0  10 -15  -27.59   54.16
   0 -10  15  -25.46   72.51
   0  10 -14   60.09   40.83
   0 -10  14   87.84   67.47
   0  10 -13   -6.75   37.01
   0  10 -13   38.34   44.03
   0 -10  13   10.82   51.58
   0  10 -12   63.38   36.07
   0  10 -12  110.58   45.64
   0 -10  12  125.31   58.30
   0  10 -11 2086.48  125.34
   0  10 -11 1978.97  103.82
   0 -10  11 2162.14  156.99
   0  10 -10  215.37   39.78
   0  10 -10  261.44   52.70
   0 -10  10  282.84   58.73
   0  10  -9  321.55   57.07
   0  10  -9  367.28   38.04
   0 -10   9  333.95   46.86
   0 -10   9  218.29   43.37
   0  10  -8   43.23   33.31
   0  10  -8   57.93   26.52
   0 -10   8   55.91   30.19
   0 -10   8   14.83   32.87
   0  10  -7   38.85   25.49
   0 -10   7   55.14   35.75
   0 -10   7   14.35   40.01
   0  10  -6 1482.99  129.59
   0  10  -6 1786.11  108.63
   0  10  -6 1575.08   75.76
   0 -10   6 1500.58   82.06
   0 -10   6 1759.19   78.83
   0 -10   6 1730.55  121.58
   0  10  -5 4455.40  181.40
   0  10  -5 4754.93  230.02
   0  10  -5 4062.52  226.88
   0 -10   5 4276.77  184.19
   0 -10   5 4289.51  170.04
   0 -10   5 4143.53  244.94
   0  10  -4 2283.45  128.19
   0  10  -4 2155.02   96.32
   0  10  -4 2169.62  131.64
   0 -10   4 2124.05   97.73
   0 -10   4 2325.41   91.77
   0 -10   4 2387.84  164.15
   0  10  -3  526.25   47.52
   0  10  -3  443.78   50.99
   0  10  -3  349.41   62.42
   0 -10   3  383.51   36.92
   0 -10   3  409.44   35.02
   0 -10   3  307.90   80.80
   0  10  -2    7.21   30.53
   0  10  -2   44.78   40.03
   0 -10   2   -8.76   43.69
   0 -10   2   15.24   27.91
   0 -10   2   35.07   20.52
   0  10  -1  333.74   57.21
   0  10  -1  366.93   47.46
   0 -10   1  228.05   30.60
   0 -10   1  225.41   67.70
   0 -10   1  356.52   31.40
   0  10   0  262.14   47.39
   0 -10   0  306.65   31.28
   0 -10   0  320.39   40.38
   0 -10   0  327.67   74.79
   0  10   1  243.34   50.59
   0 -10  -1  231.87   30.57
   0 -10  -1  269.94   75.12
   0  10   2 2583.48  161.90
   0 -10  -2 2646.63  105.61
   0 -10  -2 2535.34  164.14
   0  10   3  145.23   44.82
   0 -10  -3  160.40   75.34
   0 -10  -3  116.42   28.20
   0  10   4  459.14   61.06
   0 -10  -4  409.51   47.30
   0 -10  -4  472.81   80.73
   0  10   5  247.02   58.93
   0 -10  -5  233.88   32.81
   0 -10  -5  130.91   96.09
   0  10   6  157.07   64.09
   0 -10  -6    9.02   28.39
   0 -10  -6  219.88   90.01
   0  10   7  285.12   98.75
   0 -10  -7  269.02  134.51
   0 -10  -7  348.93   42.08
   0  11 -14  116.35   59.22
   0 -11  14   65.93   55.97
   0  11 -13    7.92   35.72
   0 -11  13   53.70   58.24
   0  11 -12  407.67   54.26
   0  11 -12  422.55   62.58
   0 -11  12  419.27   64.92
   0  11 -11 2701.62  133.64
   0  11 -11 2667.15  147.58
   0 -11  11 2926.31  159.12
   0  11 -10  370.07   63.80
   0  11 -10  395.65   45.30
   0 -11  10  268.38   50.71
   0 -11  10  271.42   51.53
   0  11  -9  278.08   61.22
   0  11  -9  517.18   48.20
   0 -11   9  444.31   52.91
   0 -11   9  477.87   60.95
   0  11  -8  149.53   49.35
   0  11  -8  169.60   44.40
   0 -11   8  134.50   52.96
   0 -11   8  145.21   48.18
   0  11  -7   32.70   36.69
   0  11  -7    3.13   37.44
   0 -11   7   45.13   38.14
   0 -11   7  152.50   45.57
   0  11  -6  291.45   35.56
   0  11  -6  342.46   60.58
   0 -11   6  237.86   37.27
   0 -11   6  135.58   72.43
   0  11  -5 5550.10  302.03
   0  11  -5 5396.41  262.53
   0 -11   5 5741.28  347.01
   0 -11   5 5466.97  240.80
   0  11  -4   15.29   30.95
   0  11  -4   -9.86   43.75
   0 -11   4   20.13   54.77
   0 -11   4   21.00   24.09
   0  11  -3   33.79   26.83
   0  11  -3   23.98   32.10
   0 -11   3   32.47   62.36
   0 -11   3   31.72   23.40
   0  11  -2   74.62   52.76
   0  11  -2   79.73   30.27
   0 -11   2  115.52   27.37
   0  11  -1  169.22   59.22
   0 -11   1  163.91   53.31
   0 -11   1  169.87   32.73
   0  11   0 2056.75  132.12
   0 -11   0 1901.93  140.58
   0 -11   0 2112.89   98.48
   0  11   1  689.31  101.63
   0 -11  -1  861.23   58.65
   0 -11  -1  996.67  100.19
   0  11   2  201.12   47.95
   0 -11  -2  134.23   62.17
   0 -11  -2  131.39   29.28
   0  11   3  139.12   47.85
   0 -11  -3   24.47   25.25
   0 -11  -3   -5.76   70.68
   0  11   4  -34.40   56.10
   0 -11  -4  -22.24   73.35
   0 -11  -4    4.67   24.07
   0  11   5   -0.98   50.21
   0 -11  -5   12.09   26.49
   0 -11  -5  117.11   63.58
   0 -11  -6  261.49  100.21
   0 -11  -6  238.75   40.58
   0 -12  14  -34.77   65.18
   0  12 -13   36.61   50.22
   0 -12  13   25.66   60.18
   0  12 -12 1122.25  112.16
   0 -12  12 1230.30  102.08
   0  12 -11   74.94   48.52
   0  12 -11  125.56   38.24
   0 -12  11   75.32   44.59
   0  12 -10  760.08   81.68
   0  12 -10  563.18   63.53
   0 -12  10  684.20   89.33
   0  12  -9   17.71   42.75
   0  12  -9   57.29   40.74
   0 -12   9   28.26   35.82
   0 -12   9   77.60   49.78
   0  12  -8   60.96   47.99
   0  12  -8   69.41   42.75
   0 -12   8  165.48   59.05
   0 -12   8  112.07   37.66
   0  12  -7 1150.67   90.85
   0  12  -7 1065.30  101.51
   0 -12   7 1172.55   97.55
   0 -12   7 1311.04  134.20
   0  12  -6  165.65   52.34
   0  12  -6  127.61   46.82
   0 -12   6  189.57   73.97
   0 -12   6  127.04   36.52
   0  12  -5 1072.21  102.10
   0  12  -5 1043.13   71.18
   0 -12   5 1068.70  153.01
   0 -12   5 1117.65   66.40
   0  12  -4  348.07   50.22
   0  12  -4  609.05   76.93
   0 -12   4  437.32   44.50
   0  12  -3  241.52   40.25
   0  12  -3  158.83   58.34
   0 -12   3  177.75   33.61
   0  12  -2   67.03   44.47
   0  12  -2  107.54   36.41
   0 -12   2   94.93   28.46
   0  12  -1  756.25   77.45
   0 -12   1  721.14   50.38
   0 -12   1  722.21   87.39
   0  12   0  668.09   83.57
   0 -12   0  745.81  120.59
   0 -12   0  694.41   51.73
   0  12   1  639.16   79.20
   0 -12  -1  480.19   46.72
   0 -12  -1  423.86   98.89
   0  12   2  116.13   74.54
   0 -12  -2   51.95   39.18
   0 -12  -2  249.95   70.95
   0  12   3   -9.90   47.42
   0 -12  -3  226.80   88.53
   0 -12  -3    0.17   36.72
   0  12   4  234.27   61.06
   0 -12  -4   26.99   32.78
   0 -12  -4   80.27  108.16
   0 -13  13   -7.54   59.46
   0  13 -12  582.00   62.12
   0 -13  12  121.17   69.12
   0  13 -11 1437.11  123.16
   0  13 -11 1415.63  112.72
   0 -13  11 1230.45  106.83
   0  13 -10  170.95   45.37
   0  13 -10  173.41   54.75
   0 -13  10  173.14   49.08
   0  13  -9   53.61   39.25
   0  13  -9  149.81   51.78
   0 -13   9   90.66   40.93
   0  13  -8  120.34   50.73
   0  13  -8   46.59   36.42
   0 -13   8   55.14   38.97
   0  13  -7  223.72   45.40
   0  13  -7  271.47   65.20
   0 -13   7  273.86   44.31
   0  13  -6 1141.46  115.84
   0  13  -6 1588.52  113.89
   0 -13   6 1122.26   83.37
   0  13  -5  150.56   68.72
   0  13  -5  217.40   60.69
   0 -13   5  348.00   44.88
   0  13  -4  -17.63   49.07
   0  13  -4   83.44   45.64
   0 -13   4   11.77   34.64
   0  13  -3   14.47   52.18
   0  13  -3    4.70   45.89
   0 -13   3   12.47   34.52
   0  13  -2  -57.14   40.15
   0 -13   2   24.09   46.74
   0 -13   2   31.15   34.15
   0  13  -1  839.92  121.49
   0 -13   1  858.76  140.24
   0 -13   1  903.05   82.29
   0  13   0  103.59   53.62
   0 -13   0  111.26   34.89
   0 -13   0  120.72   96.56
   0  13   1  228.75   63.57
   0 -13  -1  396.01  109.17
   0 -13  -1  165.24   37.15
   0  13   2  -22.54   48.82
   0 -13  -2    7.42   30.75
   0 -13  -2  128.11   84.06
   0 -13  -3   31.49   96.50
   0 -13  -3  -14.21   30.22
   0 -14  12   30.95   48.17
   0  14 -11   45.98   41.05
   0 -14  11   17.77   45.36
   0  14 -10  150.27   58.63
   0  14 -10   99.60   57.81
   0 -14  10   56.59   62.60
   0  14  -9   47.58   59.00
   0  14  -9  171.13   46.01
   0 -14   9  149.69   48.64
   0  14  -8  141.81   65.90
   0  14  -8  246.23   64.15
   0 -14   8  131.20   45.17
   0  14  -7   75.23   43.07
   0  14  -7  140.20   64.84
   0 -14   7   35.98   35.56
   0  14  -6 1425.66  130.43
   0  14  -6 1375.48  136.60
   0 -14   6 1367.29   94.98
   0  14  -5   -2.75   42.99
   0  14  -5   47.07   58.26
   0 -14   5   67.51   43.38
   0  14  -4  262.26   87.47
   0  14  -4  321.43   74.70
   0 -14   4  346.67   58.23
   0  14  -3  403.64   95.23
   0  14  -3  232.46   72.56
   0 -14   3  362.66   47.86
   0  14  -2   58.98   60.82
   0 -14   2   -1.22   40.75
   0 -14   2    3.08   78.39
   0  14  -1  161.24   58.46
   0 -14   1   70.45   36.32
   0 -14   1  -26.57   97.19
   0  14   0  601.48  103.38
   0 -14   0  560.84  111.24
   0 -14   0  216.68   48.16
   0  14   1  -14.04   58.48
   0 -14  -1   84.85   78.09
   0  15  -9   36.64   61.23
   0  15  -9   54.00   45.40
   0 -15   9   40.09   42.53
   0  15  -8  280.59   81.52
   0  15  -8  224.42   79.63
   0 -15   8  290.73   54.48
   0  15  -7  215.76   94.21
   0  15  -7  394.27   67.45
   0 -15   7  358.97   58.40
   0  15  -6   29.75   39.49
   0  15  -6  -31.38   60.61
   0 -15   6   -1.84   34.82
   0  15  -5   67.18   64.16
   0  15  -5   94.13   75.30
   0 -15   5   39.85   49.61
   0  15  -4   64.55   46.69
   0  15  -4  -68.48   43.65
   0 -15   4   -0.39   33.49
   0  15  -3   84.10   87.34
   0 -15   3  226.49   84.19
   0  15  -2  521.45  120.52
   0 -15   2  380.75  145.39
   1 -15   2  -56.60   95.29
  -1  15  -2   -7.31   52.36
   1 -15   3   38.36   39.03
   1 -15   3  143.75   99.74
  -1  15  -3   50.50   73.87
   1 -15   4  109.18   48.35
  -1  15  -4  137.09   71.11
  -1  15  -4  -25.58   49.77
   1 -15   5   21.35   37.56
  -1  15  -5   66.30   59.30
  -1  15  -5   11.92   66.75
   1 -15   6   73.00   42.36
  -1  15  -6   70.30   60.07
  -1  15  -6   43.92   64.71
   1 -15   7  410.07   61.94
  -1  15  -7  368.22   78.61
  -1  15  -7  299.93   66.84
   1 -15   8  753.32  104.93
  -1  15  -8  602.44  100.05
  -1  15  -8  916.92   86.97
  -1  15  -9   -4.76   53.82
   1 -14  -1  -44.01   88.34
   1 -14  -1   50.53   35.79
  -1  14   1  149.23   78.07
   1 -14   0  157.88   99.70
   1 -14   0   65.08   35.54
  -1  14   0  -41.43   69.64
   1 -14   1  589.14  125.71
   1 -14   1  303.14   63.47
  -1  14  -1  325.01   98.04
   1 -14   2  434.15   70.70
   1 -14   2  578.78   98.65
  -1  14  -2  457.25  102.65
   1 -14   3  112.96   41.57
  -1  14  -3  342.55   76.42
  -1  14  -3  215.95   55.80
   1 -14   4   24.58   44.06
  -1  14  -4   71.59   53.84
  -1  14  -4   17.88   52.40
   1 -14   5   26.56   34.96
  -1  14  -5    5.10   50.22
  -1  14  -5   46.17   56.12
   1 -14   6   34.34   46.43
  -1  14  -6   19.91   39.75
  -1  14  -6   79.93   50.99
   1 -14   7 1514.23  105.12
  -1  14  -7 1403.45  125.73
  -1  14  -7 1544.31  128.97
   1 -14   8  162.27   49.76
  -1  14  -8  180.03   47.77
  -1  14  -8  137.63   49.46
   1 -14   9    2.18   51.76
  -1  14  -9   18.28   41.24
  -1  14  -9   58.29   51.75
   1 -14  10  -15.28   54.13
  -1  14 -10    4.86   47.32
   1 -14  11   -0.94   44.58
  -1  14 -11  -10.89   38.49
   1 -13  -3   19.19   34.21
   1 -13  -3   85.20   80.94
  -1  13   3   41.80   52.44
   1 -13  -2   68.62   64.05
   1 -13  -2    3.40   38.04
  -1  13   2  -84.17   62.10
   1 -13  -1    6.13   31.09
   1 -13  -1   61.38   70.18
  -1  13   1   86.77   49.88
   1 -13   0   90.33   35.64
   1 -13   0  125.20   93.53
  -1  13   0  186.37   70.30
   1 -13   1  494.84   65.48
   1 -13   1  487.50  118.14
  -1  13  -1  481.78   72.34
   1 -13   2 1089.19   74.89
   1 -13   2 1157.96  157.74
  -1  13  -2 1076.07   94.96
   1 -13   3   35.44   30.72
  -1  13  -3    7.69   47.50
  -1  13  -3    5.88   36.83
   1 -13   4  327.85   44.00
  -1  13  -4  346.21   69.04
  -1  13  -4  423.14   55.68
   1 -13   5  375.96   48.16
  -1  13  -5  435.03   68.22
  -1  13  -5  370.73   68.29
   1 -13   6   97.35   33.76
  -1  13  -6  -17.60   35.36
  -1  13  -6   33.37   46.16
   1 -13   7  126.67   87.63
   1 -13   7  144.90   59.13
  -1  13  -7  202.41   49.20
  -1  13  -7  205.86   44.60
   1 -13   8 2887.06  158.58
  -1  13  -8 2937.35  157.38
  -1  13  -8 2564.46  155.06
   1 -13   9  727.03   95.69
  -1  13  -9  771.57   86.83
  -1  13  -9  575.44   67.44
   1 -13  10  700.51   95.99
  -1  13 -10  606.00   82.69
  -1  13 -10  556.81   59.49
   1 -13  11  623.88   74.23
  -1  13 -11  406.15   65.60
   1 -13  12   13.17   48.25
  -1  13 -12   71.13   41.38
   1 -13  13  562.69   92.06
   1 -12  -5  144.32   54.49
   1 -12  -4  228.28   47.11
   1 -12  -4   91.69  113.78
  -1  12   4  112.24   64.01
   1 -12  -3  106.39   69.34
   1 -12  -3   74.42   31.15
  -1  12   3   30.86   53.35
   1 -12  -2    2.05   25.31
   1 -12  -2 -100.24   79.27
  -1  12   2  -52.14   57.87
   1 -12  -1  -21.22   54.96
   1 -12  -1   19.53   25.81
  -1  12   1   -3.12   56.53
   1 -12   0  281.83   73.17
   1 -12   0  382.95   52.21
  -1  12   0  352.06   62.25
   1 -12   1 2562.03  133.80
   1 -12   1 2357.13  219.46
  -1  12  -1 2378.91  182.74
   1 -12   2   -6.80   35.35
  -1  12  -2  -25.09   43.51
  -1  12  -2  -35.36   47.71
   1 -12   3   57.23   32.55
  -1  12  -3   91.73   49.59
  -1  12  -3   76.33   34.65
   1 -12   4  -16.54   25.35
  -1  12  -4   -0.60   28.66
  -1  12  -4   -8.25   38.08
   1 -12   5  109.27   81.46
   1 -12   5  114.58   34.37
  -1  12  -5  227.35   38.11
  -1  12  -5  135.12   46.70
   1 -12   6 3289.00  183.79
   1 -12   6 3273.07  236.32
  -1  12  -6 3164.51  181.57
  -1  12  -6 3306.10  159.87
   1 -12   7  206.94   62.73
   1 -12   7   32.96   46.98
  -1  12  -7  111.26   35.33
  -1  12  -7  145.82   42.36
   1 -12   8  286.66   52.72
   1 -12   8  316.03   65.43
  -1  12  -8  375.59   48.17
  -1  12  -8  357.24   46.30
   1 -12   9   48.66   51.52
   1 -12   9   35.17   38.06
  -1  12  -9   97.81   32.85
  -1  12  -9   34.03   31.48
   1 -12  10  140.98   43.73
  -1  12 -10  185.64   40.51
  -1  12 -10   74.45   41.08
   1 -12  11   63.02   61.12
  -1  12 -11   92.78   34.21
  -1  12 -11   70.30   37.46
   1 -12  12  424.83   91.53
  -1  12 -12  399.53   73.78
   1 -12  13  300.71   96.18
  -1  12 -13  398.13   58.34
   1 -12  14   37.54   58.23
   1 -11  -6  215.86   54.71
   1 -11  -6  361.19  129.27
  -1  11   6  297.85   71.73
   1 -11  -5  -16.29   84.15
   1 -11  -5    2.91   30.70
  -1  11   5   11.80   44.19
   1 -11  -4  101.84   29.78
   1 -11  -4  -41.06   90.95
  -1  11   4  215.64   52.21
   1 -11  -3   23.98   33.40
   1 -11  -3   41.85   74.10
  -1  11   3  110.03   58.35
   1 -11  -2   10.53   27.53
   1 -11  -2   -8.39   64.69
  -1  11   2    3.36   50.08
   1 -11  -1  724.06  109.89
   1 -11  -1  800.57   50.23
  -1  11   1  510.10   94.66
   1 -11   0   19.49   23.07
   1 -11   0  -19.74   42.07
  -1  11   0  -11.55   44.05
   1 -11   1  326.01   60.94
   1 -11   1  340.73   38.16
  -1  11  -1  369.91   67.35
   1 -11   2  720.12   60.36
  -1  11  -2  634.65   80.70
  -1  11  -2  802.41   56.59
   1 -11   3  362.09   99.71
   1 -11   3  638.66   46.09
  -1  11  -3  350.88   69.08
  -1  11  -3  658.37   58.41
   1 -11   4  932.46   58.07
   1 -11   4  753.33  114.02
  -1  11  -4  933.16   71.17
  -1  11  -4  863.13   77.43
   1 -11   5 1657.75   89.03
   1 -11   5 1515.93  131.79
  -1  11  -5 1613.82  100.73
  -1  11  -5 1641.27   82.86
   1 -11   6 3152.04  203.42
   1 -11   6 3400.04  163.76
  -1  11  -6 3371.98  172.64
  -1  11  -6 3339.63  153.77
   1 -11   7 2581.94  124.71
   1 -11   7 2319.75  146.83
  -1  11  -7 2317.46  115.80
  -1  11  -7 2190.11  119.98
   1 -11   8  144.16   49.01
   1 -11   8  130.21   36.08
  -1  11  -8   87.24   30.47
  -1  11  -8   76.94   40.63
   1 -11   9  183.34   50.39
   1 -11   9  204.03   47.53
  -1  11  -9  211.18   38.88
  -1  11  -9  211.53   39.45
   1 -11  10   96.97   35.34
   1 -11  10  138.41   43.72
  -1  11 -10  132.08   40.74
  -1  11 -10   46.95   35.15
   1 -11  11   24.19   51.34
  -1  11 -11    4.03   28.35
  -1  11 -11   33.62   30.91
   1 -11  12 2574.11  201.01
  -1  11 -12 2561.68  143.54
   1 -11  13   -7.15   54.20
  -1  11 -13   -6.75   35.81
   1 -11  14    0.00   67.78
  -1  11 -14  -26.46   37.47
   1 -10  -7   -6.48   25.24
   1 -10  -7  -47.70   68.94
  -1  10   7  -46.08   48.36
   1 -10  -6  391.67   59.49
   1 -10  -6  827.73  138.41
  -1  10   6  564.25   98.49
   1 -10  -5  535.20   43.20
   1 -10  -5  479.25  126.35
  -1  10   5  585.26   71.93
   1 -10  -4   -1.65   20.90
   1 -10  -4   34.56   63.67
  -1  10   4  -17.19   37.07
   1 -10  -3  239.63   85.44
   1 -10  -3  207.97   29.62
  -1  10   3  247.17   48.15
   1 -10  -2   -5.43   24.88
   1 -10  -2    7.09   45.42
  -1  10   2  -11.26   35.15
   1 -10  -1 2308.13   96.13
   1 -10  -1 2347.77  149.95
  -1  10   1 2264.30  151.53
   1 -10   0 3015.91  201.93
   1 -10   0 2857.36  118.14
  -1  10   0 2972.72  150.36
   1 -10   1  184.97   28.04
   1 -10   1  210.25   35.88
   1 -10   1  292.71   55.76
  -1  10  -1  165.42   38.63
  -1  10  -1  149.46   36.57
   1 -10   2    4.77   26.63
   1 -10   2   -8.23   21.02
   1 -10   2   -1.31   37.98
  -1  10  -2    1.48   35.37
  -1  10  -2   18.95   22.92
   1 -10   3    0.64   46.03
   1 -10   3    1.08   18.75
   1 -10   3   -7.91   20.55
  -1  10  -3  -11.80   22.97
  -1  10  -3   18.17   29.02
  -1  10  -3   23.24   32.81
   1 -10   4 1109.50   66.10
   1 -10   4 1102.47   63.79
   1 -10   4 1045.41   98.79
  -1  10  -4 1107.39   76.08
  -1  10  -4 1082.08   84.11
  -1  10  -4 1155.55   60.80
   1 -10   5 3430.90  195.00
   1 -10   5 3681.26  156.53
   1 -10   5 3589.65  144.60
  -1  10  -5 3155.24  156.72
  -1  10  -5 3592.45  183.52
  -1  10  -5 3441.15  143.86
   1 -10   6  146.40   32.07
   1 -10   6  128.91   46.45
  -1  10  -6   83.38   35.14
  -1  10  -6   91.95   26.94
   1 -10   7  404.91   54.00
   1 -10   7  274.01   51.20
  -1  10  -7  408.42   37.97
  -1  10  -7  366.33   39.55
   1 -10   8  120.28   41.43
   1 -10   8  145.35   45.98
  -1  10  -8  160.07   35.28
  -1  10  -8  114.53   29.88
   1 -10   9  342.78   45.71
   1 -10   9  492.56   66.56
  -1  10  -9  210.31   38.15
  -1  10  -9  392.79   39.38
   1 -10  10 2340.57  135.64
  -1  10 -10 2395.42  119.59
  -1  10 -10 2457.17  113.95
   1 -10  11   39.84   38.47
  -1  10 -11   35.73   34.98
  -1  10 -11    0.95   18.98
  -1  10 -11    9.20   24.16
   1 -10  12 1127.06   94.88
  -1  10 -12 1016.56   95.58
   1 -10  13  379.47   98.47
  -1  10 -13  485.04   73.29
   1 -10  14  149.33   76.35
  -1  10 -14   60.16   44.41
   1 -10  15   81.32   63.84
   1  -9  -8  373.04   48.19
   1  -9  -8  352.07  129.18
  -1   9   8  283.27   90.94
   1  -9  -7  113.90   28.14
   1  -9  -7  102.85   73.49
  -1   9   7  110.41   52.57
   1  -9  -6   50.64   78.76
   1  -9  -6   58.58   31.59
  -1   9   6  154.91   45.65
   1  -9  -5   91.02   24.30
   1  -9  -5  191.76   78.16
  -1   9   5  126.32   44.72
   1  -9  -4  327.45   77.16
   1  -9  -4  295.75   36.14
  -1   9   4  128.41   52.09
   1  -9  -3   15.83   18.52
   1  -9  -3    0.92   41.74
  -1   9   3    9.06   34.09
   1  -9  -2  280.74   44.34
   1  -9  -2  468.18   75.60
   1  -9  -2  281.60   37.59
  -1   9   2  367.23   51.15
   1  -9  -1   -8.49   56.52
   1  -9  -1    0.84   46.78
   1  -9  -1   24.91   19.16
   1  -9  -1   16.82   20.68
  -1   9   1   -2.40   31.01
  -1   9   1   30.84   34.73
   1  -9   0 6684.58  373.93
   1  -9   0 6324.88  396.13
   1  -9   0 6259.47  277.02
   1  -9   0 6402.99  255.74
  -1   9   0 6188.86  288.62
  -1   9   0 6536.41  293.18
   1  -9   1   -4.95   18.42
   1  -9   1   12.90   21.63
   1  -9   1  -21.47   45.11
  -1   9  -1    6.32   23.90
  -1   9  -1    4.15   24.80
  -1   9  -1   -7.77   21.26
   1  -9   2  772.98   46.22
   1  -9   2  714.15   48.82
   1  -9   2  777.00   70.90
  -1   9  -2  903.83   57.72
  -1   9  -2  747.05   46.74
  -1   9  -2  811.28   65.52
   1  -9   3  185.84   31.03
   1  -9   3  315.17   54.80
   1  -9   3  332.75   26.55
  -1   9  -3  245.14   39.69
  -1   9  -3  304.99   42.61
  -1   9  -3  313.07   31.45
   1  -9   4  -21.01   22.00
   1  -9   4   19.94   37.79
   1  -9   4    6.88   17.47
  -1   9  -4   -4.05   29.72
  -1   9  -4   35.48   28.22
  -1   9  -4   20.37   26.54
   1  -9   5 5435.06  272.43
   1  -9   5 5464.71  213.59
   1  -9   5 5441.89  235.57
  -1   9  -5 5531.89  261.16
  -1   9  -5 5016.92  235.74
  -1   9  -5 5588.74  224.49
   1  -9   6 5782.25  266.20
   1  -9   6 5986.27  262.73
   1  -9   6 5948.50  236.11
  -1   9  -6 5505.19  241.89
  -1   9  -6 5451.46  281.33
  -1   9  -6 6015.67  265.24
   1  -9   7  307.34   39.25
   1  -9   7  262.36   46.07
   1  -9   7  251.89   33.28
  -1   9  -7  342.34   33.03
  -1   9  -7  258.05   32.82
  -1   9  -7  276.39   47.67
   1  -9   8  715.91   54.78
   1  -9   8  667.78   52.14
  -1   9  -8  657.24   52.99
  -1   9  -8  670.93   45.02
   1  -9   9  139.97   40.21
  -1   9  -9  220.14   34.09
  -1   9  -9  199.44   39.77
   1  -9  10 1781.84  107.28
  -1   9 -10 1636.30   83.06
  -1   9 -10 1555.14   77.85
  -1   9 -10 1719.07   67.34
   1  -9  11 3463.19  220.88
  -1   9 -11 3426.85  150.01
  -1   9 -11 3054.91  146.35
   1  -9  12   -4.63   54.47
  -1   9 -12   -1.51   30.86
  -1   9 -12   23.13   23.19
   1  -9  13  102.61   42.86
  -1   9 -13  -23.42   33.83
   1  -9  14    0.60   45.16
  -1   9 -14    5.50   34.78
   1  -9  15  275.59   92.57
  -1   9 -15  123.26   50.80
   1  -8  -9   47.14   27.00
   1  -8  -9   73.41   88.69
  -1   8   9   31.16   49.61
   1  -8  -8  -39.27   77.63
   1  -8  -8  -64.90   30.14
  -1   8   8    2.03   44.16
   1  -8  -7 1321.55  132.75
   1  -8  -7 1356.29   64.04
  -1   8   7 1452.20  109.27
   1  -8  -6  117.42   74.47
   1  -8  -6   89.25   30.05
  -1   8   6  113.00   51.46
   1  -8  -5   14.75   18.42
   1  -8  -5  -34.60   40.01
  -1   8   5   22.44   31.36
   1  -8  -4  377.62   27.27
   1  -8  -4  324.72   47.76
   1  -8  -4  377.75   76.82
  -1   8   4  428.80   49.06
  -1   8   4  383.36   48.12
   1  -8  -3   17.28   20.82
   1  -8  -3   21.81   40.23
   1  -8  -3   79.80   37.64
   1  -8  -3    6.44   16.63
  -1   8   3    3.60   29.19
  -1   8   3   24.89   30.57
   1  -8  -2 4360.66  228.58
   1  -8  -2 4401.30  161.42
   1  -8  -2 4455.81  171.22
   1  -8  -2 4364.01  229.55
  -1   8   2 4434.74  184.29
  -1   8   2 4390.16  204.84
   1  -8  -1 4215.93  210.55
   1  -8  -1 4080.09  153.72
   1  -8  -1 4031.35  148.58
   1  -8  -1 4194.16  217.00
  -1   8   1 4538.74  200.50
  -1   8   1 4286.65  175.41
   1  -8   0   27.65   17.10
   1  -8   0   -0.90   32.78
   1  -8   0   35.11   24.57
  -1   8   0   47.65   35.26
  -1   8   0   55.17   29.43
   1  -8   1  102.03   24.37
   1  -8   1   92.23   43.40
   1  -8   1   96.68   27.97
  -1   8  -1   81.90   27.22
  -1   8  -1  148.69   26.04
  -1   8  -1   80.64   22.61
   1  -8   2    7.16   13.85
   1  -8   2    1.24   33.21
   1  -8   2   -2.74   16.62
  -1   8  -2    3.73   21.51
  -1   8  -2   20.88   20.56
  -1   8  -2    4.04   21.95
   1  -8   3  531.65   36.14
   1  -8   3  472.41   54.84
   1  -8   3  394.08   28.30
  -1   8  -3  534.27   41.41
  -1   8  -3  395.03   30.84
  -1   8  -3  437.90   45.48
   1  -8   412719.77  621.73
   1  -8   412525.18  652.80
   1  -8   412942.24  590.39
  -1   8  -412420.35  585.84
  -1   8  -412855.66  649.50
  -1   8  -412185.49  606.66
   1  -8   5  543.30   42.53
   1  -8   5  510.25   48.11
   1  -8   5  475.41   30.83
  -1   8  -5  487.98   34.76
  -1   8  -5  560.04   48.85
  -1   8  -5  482.82   41.34
   1  -8   6 1388.83   72.02
   1  -8   6 1417.76   75.32
   1  -8   6 1497.01   62.33
  -1   8  -6 1428.57  102.26
  -1   8  -6 1399.46   67.20
  -1   8  -6 1487.93   64.07
   1  -8   7  905.21   53.07
   1  -8   7  837.72   46.36
   1  -8   7  878.94   59.04
  -1   8  -7  759.93   69.82
  -1   8  -7  860.00   52.04
  -1   8  -7  904.00   47.94
   1  -8   8  484.83   30.21
   1  -8   8  379.38   60.01
   1  -8   8  507.82   37.31
   1  -8   8  511.82   38.82
  -1   8  -8  455.31   39.75
  -1   8  -8  464.30   37.40
   1  -8   9   16.66   41.54
   1  -8   9   25.83   22.53
  -1   8  -9   26.78   14.65
  -1   8  -9   56.09   23.18
  -1   8  -9   33.08   23.77
   1  -8  10 1633.79  125.49
  -1   8 -10 1614.17   57.97
  -1   8 -10 1546.75   77.99
  -1   8 -10 1518.64   79.07
   1  -8  11 3782.16  198.92
  -1   8 -11 4111.68  172.45
  -1   8 -11 3767.85  170.79
   1  -8  12  149.75   51.45
  -1   8 -12  173.71   35.73
  -1   8 -12  175.26   35.87
   1  -8  13  160.54   51.05
  -1   8 -13  152.07   45.85
  -1   8 -13   15.62   33.03
   1  -8  14  217.49   71.24
  -1   8 -14   41.81   40.15
   1  -8  15  111.85   82.42
  -1   8 -15  126.23   61.12
   1  -7 -10  245.11  110.01
   1  -7 -10  212.20   39.74
  -1   7  10  266.24   62.76
   1  -7  -9  500.02   38.68
   1  -7  -9  538.06  100.89
  -1   7   9  682.83   74.47
   1  -7  -8  198.36   70.19
   1  -7  -8  242.63   34.03
  -1   7   8  153.92   54.20
   1  -7  -7  152.04   30.76
   1  -7  -7  199.17   75.88
  -1   7   7  163.90   54.66
   1  -7  -6 1684.54   63.19
   1  -7  -6 1815.84  159.15
  -1   7   6 1628.77  127.61
   1  -7  -5  751.88   78.78
   1  -7  -5  709.87   63.30
   1  -7  -5  883.81   49.90
  -1   7   5  849.70   79.47
  -1   7   5  833.74   60.68
   1  -7  -4 1773.79   93.26
   1  -7  -4 1866.61   63.64
   1  -7  -4 1663.27  112.96
   1  -7  -4 2033.47  123.39
  -1   7   4 1803.09   98.45
  -1   7   4 1569.57   83.42
   1  -7  -3 3730.25  150.57
   1  -7  -3 3545.63  124.35
   1  -7  -3 3501.26  187.52
   1  -7  -3 4026.57  196.23
  -1   7   3 3776.34  173.74
  -1   7   3 3837.33  157.78
   1  -7  -2 1196.89   47.56
   1  -7  -2 1226.75   79.71
   1  -7  -2 1183.74   80.09
   1  -7  -2 1109.51   59.73
  -1   7   2 1132.01   52.22
  -1   7   2 1151.18   69.27
   1  -7  -1 6703.72  256.63
   1  -7  -1 6848.62  341.50
   1  -7  -1 7175.78  360.81
   1  -7  -1 6549.31  247.20
  -1   7   1 6788.51  276.71
  -1   7   1 6780.32  294.25
   1  -7   0 1888.59   68.04
   1  -7   0 1965.15  112.92
   1  -7   0 1974.57   73.81
  -1   7   0 1858.01   83.92
  -1   7   0 2080.72   79.15
  -1   7   0 1762.74   71.88
   1  -7   1   59.62   15.31
   1  -7   1   87.03   27.79
   1  -7   1   60.00   17.54
  -1   7  -1   79.01   24.94
  -1   7  -1   30.81   30.30
  -1   7  -1  110.92   21.64
   1  -7   2  334.93   21.12
   1  -7   2  279.99   45.63
   1  -7   2  378.07   26.57
  -1   7  -2  347.42   38.34
  -1   7  -2  270.97   25.44
  -1   7  -2  343.25   29.72
   1  -7   3   19.46   19.83
   1  -7   3   26.97   28.05
   1  -7   3   14.12   13.60
  -1   7  -3   12.80   21.81
  -1   7  -3   10.56   16.30
  -1   7  -3   20.94   23.62
   1  -7   421237.85 1245.54
   1  -7   421144.63 1222.57
   1  -7   420998.55 1151.94
  -1   7  -421806.91 1287.17
  -1   7  -420486.06 1177.85
  -1   7  -421151.89 1169.89
   1  -7   5 4942.27  199.59
   1  -7   5 5110.45  179.05
   1  -7   5 4867.05  194.63
  -1   7  -5 4696.80  174.93
  -1   7  -5 4962.29  232.83
  -1   7  -5 4805.81  198.70
   1  -7   6  119.35   20.14
   1  -7   6   99.94   36.97
   1  -7   6  103.07   25.03
  -1   7  -6   84.64   19.53
  -1   7  -6   66.65   25.76
  -1   7  -6  102.99   30.15
   1  -7   7  976.42   48.27
   1  -7   7  944.45   48.11
   1  -7   7  911.35   58.65
   1  -7   7  920.86   44.29
  -1   7  -7  940.67   50.97
  -1   7  -7  925.30   44.19
   1  -7   8   87.81   17.07
   1  -7   8   79.49   23.74
   1  -7   8   69.05   32.59
  -1   7  -8  134.26   29.58
  -1   7  -8   56.02   15.50
  -1   7  -8  127.75   24.21
   1  -7   9 2581.58   87.62
   1  -7   9 2707.55  118.07
   1  -7   9 2580.83  132.11
  -1   7  -9 2744.87   79.23
  -1   7  -9 2669.01  107.39
  -1   7  -9 2572.14  109.32
   1  -7  10 4679.54  166.65
   1  -7  10 4797.92  267.93
  -1   7 -10 4352.82  188.16
  -1   7 -10 4852.08  155.62
  -1   7 -10 4611.58  193.32
   1  -7  11   73.34   50.48
  -1   7 -11   15.48   29.11
  -1   7 -11   10.38   29.51
  -1   7 -11   58.65   16.42
   1  -7  12  187.81   52.75
  -1   7 -12  242.11   38.65
  -1   7 -12  261.68   37.26
   1  -7  13  121.38   68.26
  -1   7 -13  142.09   37.53
  -1   7 -13   74.90   36.61
   1  -7  14    2.73   45.22
  -1   7 -14   12.89   33.86
   1  -7  15 1652.94  152.43
  -1   7 -15 1696.30  118.01
   1  -6 -11  -38.10   80.78
   1  -6 -11   22.05   30.45
  -1   6  11   47.27   44.79
   1  -6 -10   14.34   54.26
   1  -6 -10   -2.02   22.56
  -1   6  10   12.59   37.74
   1  -6  -9   41.64   63.94
   1  -6  -9   -0.42   24.06
  -1   6   9   83.48   37.96
   1  -6  -8 2845.98  115.54
   1  -6  -8 3147.63  228.89
  -1   6   8 2703.08  153.79
   1  -6  -7  755.01   43.65
   1  -6  -7  855.49   79.65
  -1   6   7  724.12   56.16
  -1   6   7  802.71   66.90
   1  -6  -6   75.44   39.26
   1  -6  -6   56.69   19.24
  -1   6   6   25.55   26.36
  -1   6   6   70.89   38.75
  -1   6   6   23.17   30.81
   1  -6  -5   15.51   16.05
   1  -6  -5   40.21   32.99
   1  -6  -5   37.49   45.34
   1  -6  -5   29.39   27.15
  -1   6   5   14.25   27.06
  -1   6   5   24.30   20.43
   1  -6  -4  668.58   29.08
   1  -6  -4  640.28   47.56
   1  -6  -4  626.51   62.60
   1  -6  -4  744.93   65.13
  -1   6   4  710.85   45.47
  -1   6   4  691.38   52.33
   1  -6  -3 4253.41  145.51
   1  -6  -3 4466.85  204.34
   1  -6  -3 4336.02  199.03
   1  -6  -3 4642.62  182.65
  -1   6   3 4658.11  196.07
  -1   6   3 4333.58  165.13
   1  -6  -2 6170.93  274.50
   1  -6  -2 6268.56  324.18
   1  -6  -2 6220.15  221.96
   1  -6  -2 6145.72  239.09
  -1   6   2 6331.36  269.22
  -1   6   2 6127.89  228.88
   1  -6  -1 3270.76  104.71
   1  -6  -1 3503.75  173.84
   1  -6  -1 3497.99  147.89
   1  -6  -1 3542.79  122.85
  -1   6   1 3280.46  133.08
  -1   6   1 3142.10  111.46
   1  -6   0  567.03   45.38
   1  -6   0  403.67   21.86
   1  -6   0  344.65   29.54
  -1   6   0  351.94   26.84
  -1   6   0  420.27   26.50
  -1   6   0  477.85   41.53
   1  -6   1 1969.65  101.26
   1  -6   1 2044.69   67.89
   1  -6   1 1866.40   58.12
  -1   6  -1 1920.56   76.63
  -1   6  -1 1877.47   63.66
  -1   6  -1 2100.98   88.52
   1  -6   2 4816.55  202.11
   1  -6   2 4711.64  164.05
   1  -6   2 4556.00  146.14
  -1   6  -2 4617.14  157.18
  -1   6  -2 4598.25  169.31
  -1   6  -2 4829.27  191.24
   1  -6   311115.70  519.70
   1  -6   311523.17  475.80
   1  -6   311321.47  507.94
  -1   6  -311369.57  515.73
  -1   6  -311789.70  535.82
  -1   6  -311106.56  469.76
   1  -6   4  124.52   22.82
   1  -6   4  133.75   16.53
   1  -6   4  142.01   28.79
  -1   6  -4  117.46   23.53
  -1   6  -4  106.73   26.15
  -1   6  -4   98.11   17.63
   1  -6   5 4724.58  203.16
   1  -6   5 4630.55  171.01
   1  -6   5 4740.85  160.30
  -1   6  -5 4494.48  171.91
  -1   6  -5 4847.57  168.18
  -1   6  -5 4924.72  198.34
   1  -6   6  938.80   33.97
   1  -6   6  917.95   41.74
   1  -6   6  919.81   41.04
   1  -6   6 1002.30   53.67
  -1   6  -6  986.64   43.40
  -1   6  -6 1008.34   48.25
   1  -6   7 3379.07  161.98
   1  -6   7 3645.01  121.22
   1  -6   7 3624.00  131.48
  -1   6  -7 3593.45  126.04
  -1   6  -7 3637.69  131.35
  -1   6  -7 3683.68  104.60
   1  -6   8 1982.70  102.22
   1  -6   8 2051.00   70.86
   1  -6   8 2056.72   85.62
  -1   6  -8 2049.58   85.24
  -1   6  -8 2055.37   96.92
  -1   6  -8 2051.03   59.10
   1  -6   9 1461.04   58.87
   1  -6   9 1492.62   91.63
   1  -6   9 1536.70   94.18
  -1   6  -9 1659.69   50.77
  -1   6  -9 1527.44   69.67
  -1   6  -9 1627.61   67.92
   1  -6  10 2973.16  157.81
   1  -6  10 2826.43  105.89
   1  -6  10 2929.89  146.54
  -1   6 -10 2730.69  119.97
  -1   6 -10 2977.12   90.38
  -1   6 -10 3022.56  127.99
   1  -6  11  802.80   36.01
   1  -6  11  680.95   92.14
  -1   6 -11  833.65   53.52
  -1   6 -11  854.81   42.29
  -1   6 -11  667.90   56.23
   1  -6  12  950.23   76.73
  -1   6 -12  742.22   61.48
  -1   6 -12  699.45   76.36
   1  -6  13  855.44   84.61
  -1   6 -13  753.29   84.38
  -1   6 -13  700.00   62.17
   1  -6  14  213.10   79.83
  -1   6 -14   64.52   44.22
  -1   6 -14  136.62   41.60
   1  -6  15 1597.07  193.31
  -1   6 -15 1692.75  150.67
   1  -5 -12  157.54   83.71
   1  -5 -12  202.48   41.35
  -1   5  12  258.31   80.25
   1  -5 -11  386.55  104.03
   1  -5 -11  291.20   40.72
  -1   5  11  269.11   77.44
   1  -5 -10   21.01   50.13
   1  -5 -10   56.12   24.22
   1  -5 -10    4.86   49.96
  -1   5  10   41.46   38.12
   1  -5  -9 2880.67  115.88
   1  -5  -9 2870.26  183.55
  -1   5   9 2830.34  155.49
   1  -5  -8 2941.24  216.26
   1  -5  -8 2894.64  101.78
  -1   5   8 2964.29  146.01
  -1   5   8 3117.86  126.15
   1  -5  -7   10.89   17.92
   1  -5  -7   49.49   36.69
  -1   5   7  -12.63   46.03
  -1   5   7   12.49   15.77
  -1   5   7    0.82   26.88
   1  -5  -6 1803.38  130.48
   1  -5  -6 1802.74   98.02
   1  -5  -6 1665.97   61.56
  -1   5   6 1808.63  124.67
  -1   5   6 1583.38   88.11
  -1   5   6 1905.26   73.74
   1  -5  -5   88.91   32.01
   1  -5  -5  149.33   38.84
   1  -5  -5  116.82   14.00
  -1   5   5   97.33   28.80
  -1   5   5  132.18   31.19
  -1   5   5   70.76   15.21
   1  -5  -4  150.21   33.25
   1  -5  -4  162.95   38.77
   1  -5  -4  145.62   19.69
  -1   5   4  107.34   31.10
  -1   5   4  124.40   40.15
  -1   5   4  203.17   18.06
   1  -5  -3 2487.44   74.14
   1  -5  -3 2609.64   89.82
   1  -5  -3 2481.11  140.62
   1  -5  -3 2596.42  113.60
  -1   5   3 2686.65  109.19
  -1   5   3 2679.43   83.00
   1  -5  -220898.49 1193.18
   1  -5  -219392.64 1136.78
   1  -5  -220228.12 1067.54
  -1   5   219378.34 1094.62
   1  -5  -1   90.24   25.85
   1  -5  -1  120.11   18.55
   1  -5  -1   90.40   15.41
   1  -5  -1  128.32   23.47
  -1   5   1   97.91   23.22
  -1   5   1  133.16   16.29
   1  -5   0 1975.03   58.38
   1  -5   0 1920.10   60.16
   1  -5   0 2052.14   79.36
  -1   5   0 1869.00   61.94
  -1   5   0 1929.96   70.50
  -1   5   0 1944.01   84.43
   1  -5   1 1646.73   54.04
   1  -5   1 1627.28   55.95
   1  -5   1 1836.71   79.50
  -1   5  -1 1663.51   53.37
  -1   5  -1 1679.29   58.15
  -1   5  -1 1716.56   73.12
   1  -5   2   88.71   16.87
   1  -5   2   69.08   11.76
   1  -5   2   90.25   24.94
  -1   5  -2   56.00   13.95
  -1   5  -2   91.64   21.66
  -1   5  -2   68.43   18.78
   1  -5   4 5114.21  192.09
   1  -5   4 5144.98  168.57
   1  -5   4 5123.51  184.54
  -1   5  -4 4794.16  173.81
  -1   5  -4 4911.20  164.38
  -1   5  -4 4951.90  190.55
   1  -5   5  687.07   40.53
   1  -5   5  710.52   29.00
   1  -5   5  610.71   28.80
  -1   5  -5  635.69   33.61
  -1   5  -5  660.60   31.38
   1  -5   6 1570.40   45.81
   1  -5   6 1609.42   55.61
   1  -5   6 1557.50   87.07
  -1   5  -6 1567.96   55.67
  -1   5  -6 1566.25   42.07
  -1   5  -6 1601.91   62.29
   1  -5   7  141.27   13.62
   1  -5   7  169.48   38.71
   1  -5   7  100.85   21.85
  -1   5  -7  120.20   12.20
  -1   5  -7  152.45   22.96
  -1   5  -7  162.84   21.22
   1  -5   8 4314.31  135.19
   1  -5   8 4704.66  181.94
   1  -5   8 4502.25  223.40
  -1   5  -8 4529.34  134.90
  -1   5  -8 4374.34  168.68
  -1   5  -8 4567.03  168.29
   1  -5   912351.74  629.42
   1  -5   912742.11  715.18
   1  -5   912149.99  538.11
  -1   5  -912439.56  523.60
  -1   5  -912936.75  601.85
  -1   5  -911935.05  578.05
   1  -5  10 1266.49   43.82
   1  -5  10 1309.76   82.40
   1  -5  10 1102.79  106.44
  -1   5 -10 1303.44   68.48
  -1   5 -10 1349.16   64.24
  -1   5 -10 1334.46   52.01
   1  -5  11   91.48   17.56
   1  -5  11   78.01   39.70
  -1   5 -11   83.92   21.30
  -1   5 -11  100.73   31.34
  -1   5 -11   66.78   29.06
   1  -5  12  131.83   63.77
  -1   5 -12  217.64   34.58
  -1   5 -12  168.44   35.76
  -1   5 -12   58.61   35.53
   1  -5  13  366.48  104.61
  -1   5 -13  587.38   61.55
  -1   5 -13  745.80   60.73
   1  -5  14   24.60   70.37
  -1   5 -14   58.21   39.87
  -1   5 -14   84.42   52.37
   1  -5  15  411.54   98.88
  -1   5 -15  106.06   70.40
   1  -4 -13  -68.68   33.28
   1  -4 -13  -53.07   63.25
  -1   4  13   82.36   67.57
   1  -4 -12  123.32   68.28
   1  -4 -12   34.87   30.03
  -1   4  12   32.48   52.69
   1  -4 -11   47.33   26.20
   1  -4 -11  -24.31   64.32
  -1   4  11   74.24   50.56
   1  -4 -10 1209.08   58.04
   1  -4 -10  930.80  135.89
  -1   4  10 1218.72   82.80
   1  -4  -9  614.97   39.07
   1  -4  -9  623.73   92.27
  -1   4   9  557.30   43.12
  -1   4   9  630.46   53.89
   1  -4  -8  461.76   65.15
   1  -4  -8  552.43   27.89
   1  -4  -8  613.42   81.38
  -1   4   8  598.30   38.09
  -1   4   8  623.28   49.64
  -1   4   8  449.44   93.24
   1  -4  -7  489.71   28.29
   1  -4  -7  655.06   58.42
   1  -4  -7  627.01   56.15
  -1   4   7  444.59   30.69
  -1   4   7  572.41   45.43
  -1   4   7  563.89   61.76
   1  -4  -6 3186.84  161.01
   1  -4  -6 3112.94  157.08
   1  -4  -6 3255.84  103.06
  -1   4   6 2958.82  130.05
  -1   4   6 3262.61  152.45
  -1   4   6 3359.73  112.80
   1  -4  -5  366.86   41.17
   1  -4  -5  292.14   19.68
   1  -4  -5  189.75   42.71
  -1   4   5  185.92   31.86
  -1   4   5  270.47   17.09
  -1   4   5  238.45   37.05
   1  -4  -416062.40  811.49
   1  -4  -415390.79  859.97
   1  -4  -414894.81  668.91
  -1   4   414725.42  810.14
  -1   4   415284.07  713.57
  -1   4   414846.08  760.18
   1  -4  -3 3184.63  131.76
   1  -4  -3 3022.79  130.85
   1  -4  -3 3023.12   91.61
  -1   4   3 2848.10  110.60
  -1   4   3 3100.64   98.72
  -1   4   3 2896.37  115.67
   1  -4  -2 2243.86   96.42
   1  -4  -2 2217.89   88.12
   1  -4  -2 2239.84   70.42
   1  -4  -2 2340.47   65.12
  -1   4   2 2264.98   85.53
  -1   4   2 2346.97   67.72
   1  -4  -1  242.57   16.89
   1  -4  -1  162.79   28.47
   1  -4  -1  289.39   20.06
   1  -4  -1  290.05   24.70
  -1   4   1  256.96   24.22
  -1   4   1  268.06   16.37
   1  -4   0  248.99   14.95
   1  -4   0  209.68   16.21
   1  -4   0  224.22   22.08
  -1   4   0  201.04   18.34
  -1   4   0  226.70   17.07
  -1   4   0  189.15   24.71
   1  -4   1 3570.01  108.09
   1  -4   1 3407.32  111.00
   1  -4   1 3333.36   94.86
  -1   4  -1 3246.33   98.72
  -1   4  -1 3492.54  119.40
  -1   4  -1 3705.36  117.37
   1  -4   215111.90  708.57
   1  -4   311705.29  516.66
   1  -4   312309.32  496.53
   1  -4   311752.74  501.35
  -1   4  -311674.13  515.98
   1  -4   4 2331.95   99.56
   1  -4   4 2268.39   70.93
   1  -4   4 2344.12   68.56
  -1   4  -4 2232.20   83.45
  -1   4  -4 2239.10   77.78
  -1   4  -4 2224.55   69.58
   1  -4   5   20.51   16.21
   1  -4   5    6.84   19.65
   1  -4   5   18.15    8.77
  -1   4  -5   11.05   15.03
  -1   4  -5   23.27   13.20
  -1   4  -5   15.56    7.95
   1  -4   6  687.85   54.82
   1  -4   6  705.19   27.05
   1  -4   6  622.16   31.55
  -1   4  -6  717.70   32.56
  -1   4  -6  719.91   20.98
  -1   4  -6  724.58   33.41
   1  -4   7 1026.47   47.14
   1  -4   7 1000.87   57.21
   1  -4   7  908.12   28.63
  -1   4  -7  897.43   50.00
  -1   4  -7 1000.22   42.85
  -1   4  -7  918.44   29.05
   1  -4   8  833.00   71.62
   1  -4   8  816.29   32.57
   1  -4   8  880.66   49.11
  -1   4  -8  880.08   31.00
  -1   4  -8  795.13   45.67
  -1   4  -8  976.34   44.42
   1  -4   918147.60  901.75
   1  -4   917950.95 1025.01
  -1   4  -918750.09  982.54
  -1   4  -917528.77  970.16
   1  -4  10   -1.58   36.97
   1  -4  10    3.37   11.61
  -1   4 -10   -3.28   18.10
  -1   4 -10   16.00   17.29
  -1   4 -10   -3.47   22.01
  -1   4 -10   15.53   21.92
   1  -4  11  137.10   17.03
  -1   4 -11   79.42   29.98
  -1   4 -11  139.52   33.16
  -1   4 -11  128.78   21.86
  -1   4 -11  103.15   26.01
  -1   4 -12  -11.66   23.33
  -1   4 -12    4.60   28.96
  -1   4 -12   -2.88   23.18
  -1   4 -12   -8.67   27.88
  -1   4 -13   42.70   45.08
  -1   4 -13  -14.83   45.47
  -1   4 -13  107.29   36.57
  -1   4 -14 1211.18   92.67
  -1   4 -14 1120.61   95.28
   1  -4  15  831.76  129.21
  -1   4 -15  430.44   90.89
   1  -3 -13  327.20   46.12
   1  -3 -13  476.44   78.87
  -1   3  13  341.58   79.28
   1  -3 -12  661.46   46.37
   1  -3 -12  752.53  111.65
  -1   3  12  574.53   67.35
   1  -3 -11  763.43   45.79
   1  -3 -11  493.71   87.13
  -1   3  11  818.34   81.90
   1  -3 -10   23.82   55.54
   1  -3 -10   71.11   21.46
  -1   3  10   73.39   33.14
  -1   3  10   66.94   25.78
   1  -3  -9  891.68  100.55
   1  -3  -9  801.78   41.51
   1  -3  -9  819.74   85.23
  -1   3   9  658.34   76.98
  -1   3   9  849.09   89.34
  -1   3   9  812.86   44.14
   1  -3  -8 1707.47  124.26
   1  -3  -8 1518.59   88.38
   1  -3  -8 1603.30   55.53
  -1   3   8 1550.87   60.55
  -1   3   8 1536.42   94.50
  -1   3   8 1484.63  107.41
   1  -3  -7   -2.47   28.87
   1  -3  -7    2.55   22.93
   1  -3  -7    7.45   12.62
  -1   3   7    1.13   27.85
  -1   3   7   -2.87   13.63
  -1   3   7    8.45   20.90
   1  -3  -6 1314.74   60.87
   1  -3  -6 1267.53   87.88
   1  -3  -6 1289.65   40.77
  -1   3   6 1192.60   41.94
  -1   3   6 1194.99   73.51
  -1   3   6 1306.60   62.64
   1  -3  -5 2395.14   67.46
   1  -3  -5 2532.63   93.89
   1  -3  -5 2381.04  130.70
  -1   3   5 2248.84   68.73
  -1   3   5 2193.35   85.41
  -1   3   5 2341.31  122.70
   1  -3  -410455.51  461.52
   1  -3  -410200.79  482.83
   1  -3  -410610.64  405.71
  -1   3   410908.59  528.56
  -1   3   410533.11  410.01
  -1   3   410488.53  456.16
   1  -3  -322081.41 1304.05
  -1   3   322357.55 1290.04
   1  -3  -2   91.57   18.34
   1  -3  -2  119.04   12.61
   1  -3  -2  102.31   24.58
  -1   3   2  121.91    9.94
  -1   3   2   67.03   18.57
  -1   3   2   97.70   26.60
   1  -3  -1 4650.96  142.07
   1  -3  -1 4603.38  132.69
   1  -3  -1 4823.48  162.14
   1  -3  -1 4913.78  172.18
  -1   3   1 4977.17  176.57
  -1   3   1 4948.49  153.65
   1  -3   0  291.51   19.11
   1  -3   0  246.29   16.56
   1  -3   0  240.69   14.35
  -1   3   0  302.85   19.06
  -1   3   0  324.92   21.47
  -1   3   0  268.87   16.60
   1  -3   1  835.48   24.03
   1  -3   1  887.22   34.71
   1  -3   1  826.48   32.69
  -1   3  -1  904.94   26.76
  -1   3  -1  877.86   33.62
  -1   3  -1  861.54   34.55
   1  -3   3 7793.73  262.65
   1  -3   3 7854.88  259.35
   1  -3   3 7559.58  284.56
  -1   3  -3 7362.45  279.03
  -1   3  -3 7248.32  248.36
   1  -3   4 1869.78   70.80
   1  -3   4 1920.46   47.40
   1  -3   4 1800.40   55.67
  -1   3  -4 1984.73   44.96
  -1   3  -4 1904.95   58.34
  -1   3  -4 1783.55   54.40
   1  -3   5 2324.19   59.34
   1  -3   5 2315.22   73.30
  -1   3  -5 2442.93   58.43
  -1   3  -5 2340.55   69.50
  -1   3  -5 2386.63   74.89
   1  -3   6   93.25   23.61
   1  -3   6   70.41   11.83
  -1   3  -6  136.89   21.56
  -1   3  -6   97.20   12.23
  -1   3  -6   93.39   16.68
  -1   3  -6   85.59   11.06
   1  -3   7 6977.97  240.81
   1  -3   7 7003.43  278.36
  -1   3  -7 7238.32  251.87
  -1   3  -7 7465.11  250.14
  -1   3  -7 6994.52  270.61
   1  -3   8 4173.61  133.91
   1  -3   8 4044.20  126.83
   1  -3   8 3916.17  176.82
  -1   3  -8 4244.56  138.79
  -1   3  -8 4028.22  132.67
  -1   3  -8 4049.19  172.45
   1  -3   9  109.89   20.55
   1  -3   9  130.14   13.24
   1  -3   9  121.04   30.14
  -1   3  -9  143.06   21.64
  -1   3  -9   86.69   21.33
  -1   3  -9   84.70   27.32
   1  -3  10  667.73   31.08
   1  -3  10  520.15   58.66
   1  -3  10  616.33   40.31
  -1   3 -10  653.85   42.73
  -1   3 -10  695.82   42.34
  -1   3 -10  586.93   46.08
   1  -3  11  104.12   27.32
   1  -3  11  101.08   21.22
  -1   3 -11   69.56   26.79
  -1   3 -11  107.51   41.09
  -1   3 -11  141.67   28.44
   1  -3  12  248.72   30.65
  -1   3 -12  140.23   41.29
  -1   3 -12  133.52   39.52
  -1   3 -12  193.29   34.32
   1  -3  13 1992.52   96.00
  -1   3 -13 1970.74  101.82
  -1   3 -13 1971.50  142.49
  -1   3 -14 1121.09  109.50
  -1   3 -14 1074.62   82.68
  -1   3 -15    3.07   37.61
  -1   3 -15   60.92   44.36
   1  -2 -14  293.05   67.04
   1  -2 -14   93.78   40.12
  -1   2  14  181.40   73.44
   1  -2 -13 -144.03   63.66
   1  -2 -13   33.81   27.06
  -1   2  13   43.36   45.77
   1  -2 -12  225.24   72.83
   1  -2 -12  184.47   29.69
  -1   2  12  120.88   52.91
   1  -2 -11  241.50   54.63
   1  -2 -11  225.20   29.06
  -1   2  11  172.96   33.45
  -1   2  11  307.22   52.56
   1  -2 -10 3413.14  172.76
   1  -2 -10 3306.26  124.63
   1  -2 -10 3636.35  196.52
  -1   2  10 3453.35  128.91
  -1   2  10 3421.06  183.25
   1  -2  -9   65.56   30.28
   1  -2  -9    6.50   35.56
   1  -2  -9   72.63   16.35
  -1   2   9   37.15   52.97
  -1   2   9   55.57   18.34
  -1   2   9   17.82   33.07
   1  -2  -8  787.79   48.73
   1  -2  -8  913.94   77.72
   1  -2  -8  793.86   33.78
  -1   2   8  769.74   32.71
  -1   2   8  700.98   86.98
  -1   2   8  837.18   48.23
   1  -2  -7  135.07   13.88
   1  -2  -7  154.29   31.49
   1  -2  -7   91.46   33.05
  -1   2   7   81.98   32.75
  -1   2   7  112.91   29.83
  -1   2   7   96.68   13.65
   1  -2  -6 1850.37   92.57
   1  -2  -6 1666.66   69.10
   1  -2  -6 1776.21   49.37
  -1   2   6 1934.27   88.68
  -1   2   6 1696.51   76.13
  -1   2   6 1691.29   48.68
   1  -2  -5 3157.42   86.82
   1  -2  -5 3265.89  112.29
   1  -2  -5 3336.31  156.37
  -1   2   5 3100.54   87.51
  -1   2   5 3198.36  114.59
  -1   2   5 3084.75  142.67
   1  -2  -4 3006.78   78.55
   1  -2  -4 2970.98  101.33
   1  -2  -4 3053.50  139.20
  -1   2   4 2969.77   80.56
  -1   2   4 2907.01   98.49
  -1   2   4 2865.60  113.16
  -1   2   315212.13  747.94
   1  -2  -2 1096.40   24.97
   1  -2  -2 1152.82   39.40
   1  -2  -2 1076.55   49.71
  -1   2   2 1049.01   45.04
  -1   2   2 1159.87   40.12
  -1   2   2 1147.09   29.55
   1  -2  -1 6158.94  197.57
   1  -2  -1 5826.98  167.59
   1  -2  -1 6178.32  217.73
  -1   2   1 6042.82  196.89
  -1   2   1 5798.83  199.27
   1  -2   4  121.62   13.32
   1  -2   4  104.71    8.93
   1  -2   4   65.40    7.87
  -1   2  -4   69.82    9.09
  -1   2  -4   86.54   12.53
   1  -2   5 1997.35   48.93
   1  -2   5 2145.93   68.29
   1  -2   5 2030.05   51.49
  -1   2  -5 2131.44   55.40
  -1   2  -5 1982.67   65.11
  -1   2  -5 2112.90   55.81
   1  -2   6  216.34   13.96
   1  -2   6  222.17   22.48
   1  -2   6  255.01   16.44
  -1   2  -6  202.47   13.67
  -1   2  -6  268.34   16.99
  -1   2  -6  223.53   21.45
   1  -2   7 4016.35  121.30
   1  -2   7 4156.45  167.99
   1  -2   7 4202.50  133.61
  -1   2  -7 4151.27  151.80
  -1   2  -7 4170.89  133.92
  -1   2  -7 4208.11  132.41
   1  -2   811661.61  471.24
   1  -2   811969.39  519.28
   1  -2   812154.19  618.64
  -1   2  -812195.37  514.48
  -1   2  -811803.08  513.72
  -1   2  -811655.81  548.24
   1  -2   9  528.42   61.87
   1  -2   9  538.19   29.94
   1  -2   9  422.57   20.28
  -1   2  -9  517.95   26.24
  -1   2  -9  488.83   32.91
  -1   2  -9  695.69   49.96
   1  -2  10    9.25   45.50
   1  -2  10   58.61   20.17
   1  -2  10   43.81   15.81
  -1   2 -10   26.42   21.49
  -1   2 -10   56.88   25.34
  -1   2 -10   84.19   33.94
   1  -2  11   68.14   20.61
   1  -2  11   76.99   24.00
  -1   2 -11   64.50   29.43
  -1   2 -11   99.01   31.48
  -1   2 -11   41.64   24.53
   1  -2  12  122.19   32.38
  -1   2 -12  207.64   44.02
  -1   2 -12  185.25   50.72
  -1   2 -12  190.09   24.38
   1  -2  13 1688.15   91.57
  -1   2 -13 1696.28   76.60
  -1   2 -13 1717.13  107.95
   1  -2  14  496.32   56.81
  -1   2 -14  649.27   84.20
  -1   2 -14  366.33   53.60
  -1   2 -15  105.39   38.58
  -1   2 -15  176.17   71.57
   1  -1 -14  147.28   64.34
   1  -1 -14  156.91   40.07
  -1   1  14  129.08   62.99
   1  -1 -13   -2.79   24.19
   1  -1 -13  -73.19   54.97
  -1   1  13   -7.50   39.25
   1  -1 -12  267.39   31.30
   1  -1 -12  145.15   73.82
  -1   1  12  177.27   50.40
   1  -1 -11  123.80   53.15
   1  -1 -11  139.90   60.52
   1  -1 -11  179.95   24.81
  -1   1  11  157.87   42.56
  -1   1  11  152.11   24.00
   1  -1 -10 5305.20  192.67
   1  -1 -10 5425.34  268.84
   1  -1 -10 5132.47  264.26
  -1   1  10 5261.43  243.82
  -1   1  10 5319.31  192.56
   1  -1  -9  464.23   65.73
   1  -1  -9  651.72   54.50
   1  -1  -9  552.12   30.19
  -1   1   9  517.98   51.34
  -1   1   9  533.50   27.07
  -1   1   9  417.01   66.10
   1  -1  -8  503.40   47.62
   1  -1  -8  524.59   45.07
   1  -1  -8  398.01   21.44
  -1   1   8  391.20   41.11
  -1   1   8  484.83   21.78
  -1   1   8  440.81   53.40
   1  -1  -7  421.20   19.41
   1  -1  -7  419.04   29.23
   1  -1  -7  472.62   52.81
  -1   1   7  305.56   52.89
  -1   1   7  382.51   18.75
  -1   1   7  391.35   28.11
   1  -1  -6  312.49   42.96
   1  -1  -6  350.25   23.79
   1  -1  -6  269.18   14.59
  -1   1   6  211.71   33.35
  -1   1   6  285.62   14.55
  -1   1   6  291.58   22.86
   1  -1  -515964.93  838.30
  -1   1   515230.33  720.08
  -1   1   515089.70  772.51
   1  -1  -3  347.79   11.66
   1  -1  -3  415.96   31.07
   1  -1  -3  394.89   20.46
  -1   1   3  399.48   28.80
  -1   1   3  377.78   19.30
  -1   1   3  337.70   11.57
   1  -1  -2 1955.34   66.10
   1  -1  -2 1948.27   52.27
   1  -1  -2 1893.83   39.29
  -1   1   2 1844.97   40.09
  -1   1   2 1796.94   63.77
  -1   1   2 1873.48   53.00
   1  -1  -1 4289.06  135.16
  -1   1   1 4259.43  132.76
   1  -1   2 2342.64   50.42
   1  -1   2 2273.11   55.45
  -1   1  -2 2299.84   51.77
  -1   1  -2 2317.32   57.06
   1  -1   3   51.04    8.22
   1  -1   3   57.71   13.42
   1  -1   3   65.24    8.32
  -1   1  -3   57.41   10.18
  -1   1  -3   46.92   15.52
  -1   1  -3   69.87    7.65
   1  -1   4 2488.89   75.69
   1  -1   4 2414.11   62.20
   1  -1   4 2479.03   57.17
  -1   1  -4 2501.24   70.78
  -1   1  -4 2461.94   61.12
  -1   1  -4 2397.22   72.64
   1  -1   5 3358.14  112.20
   1  -1   5 3310.75   94.05
   1  -1   5 3380.33   85.31
  -1   1  -5 3473.13   99.24
  -1   1  -5 3420.09  105.10
  -1   1  -5 3519.46  123.06
   1  -1   6 1276.20   64.24
   1  -1   6 1308.14   36.27
   1  -1   6 1241.68   41.30
  -1   1  -6 1326.73   60.43
  -1   1  -6 1308.02   41.15
  -1   1  -6 1310.74   44.53
   1  -1   7 7308.29  269.34
   1  -1   7 7351.40  335.30
   1  -1   7 7597.13  261.15
  -1   1  -7 7092.01  303.08
  -1   1  -7 7526.96  262.05
  -1   1  -7 7298.33  275.78
   1  -1   8 9531.23  445.12
   1  -1   8 9442.60  351.00
   1  -1   8 9618.20  391.41
  -1   1  -8 8692.36  422.29
  -1   1  -8 9525.99  399.48
  -1   1  -8 9736.33  376.20
   1  -1   9   -5.66   16.79
   1  -1   9   -7.61   35.37
   1  -1   9    3.00   10.47
  -1   1  -9   -0.61   11.38
  -1   1  -9   10.14   20.93
  -1   1  -9    0.17   21.09
   1  -1  10   12.26   12.97
   1  -1  10   26.56   45.18
   1  -1  10   35.11   21.57
  -1   1 -10   20.38   26.92
  -1   1 -10   22.63   13.84
  -1   1 -10   -3.40   24.47
   1  -1  11   11.96   24.80
   1  -1  11   34.90   19.91
  -1   1 -11   17.13   38.36
  -1   1 -11   64.89   33.07
  -1   1 -11   15.88   23.52
   1  -1  12   29.18   30.37
  -1   1 -12   46.65   19.62
  -1   1 -12   23.39   41.02
  -1   1 -12   45.63   44.43
   1  -1  13    5.73   34.49
  -1   1 -13   24.37   56.81
  -1   1 -13    9.57   45.58
  -1   1 -13    9.67   28.42
   1  -1  14 1811.87  113.09
  -1   1 -14 1672.91   83.87
  -1   1 -14 1599.84  120.49
   1  -1  15   66.69   50.51
  -1   1 -15   46.22   44.78
  -1   1 -15  101.28   70.77
   1   0 -15  110.10   36.11
   1   0 -15   43.13   75.65
  -1   0  15  -47.77   57.68
   1   0 -14  311.72   63.27
   1   0 -14  269.21   43.71
  -1   0  14  288.57   66.70
   1   0 -13  164.10   31.93
   1   0 -13  129.30   51.12
  -1   0  13  137.84   46.36
   1   0 -12  577.00   89.16
   1   0 -12  606.37   44.00
   1   0 -12  516.32   83.72
  -1   0  12  573.75   63.83
  -1   0  12  632.58   41.92
   1   0 -11 1787.90  109.68
   1   0 -11 1573.99  103.59
   1   0 -11 1684.95   70.12
  -1   0  11 1492.14   95.71
  -1   0  11 1679.37   63.64
   1   0 -10   32.68   17.75
   1   0 -10   -2.06   32.55
   1   0 -10   59.32   41.30
  -1   0  10   23.05   53.47
  -1   0  10   37.81   29.27
  -1   0  10   29.52   14.98
   1   0  -9 1153.25   42.11
   1   0  -9 1285.86   74.09
   1   0  -9 1140.94   70.07
  -1   0   9 1151.53   66.69
  -1   0   9 1159.62   83.08
  -1   0   9 1218.74   40.01
   1   0  -8 2115.72   89.88
   1   0  -8 1822.83   88.74
   1   0  -8 1934.13   57.32
  -1   0   8 1884.82   79.29
  -1   0   8 2048.26  101.26
  -1   0   8 2002.44   55.99
   1   0  -7  376.58   18.16
   1   0  -7  449.18   31.09
   1   0  -7  495.83   35.95
  -1   0   7  435.36   32.98
  -1   0   7  440.18   17.09
  -1   0   7  288.13   50.69
  -1   0   634029.16 2414.87
   1   0  -5 1045.11   50.49
   1   0  -5 1077.76   27.27
   1   0  -5 1091.07   44.05
  -1   0   5 1069.85   26.28
  -1   0   5 1083.47   50.60
  -1   0   5 1088.36   44.73
   1   0  -3 5900.78  212.70
  -1   0   3 5889.44  180.77
  -1   0   3 6131.30  210.81
   1   0  -2  160.16    9.96
   1   0  -2   92.59   18.31
   1   0  -2  101.31    5.03
  -1   0   2  139.00   13.79
  -1   0   2  116.16    5.35
  -1   0   2  158.28   15.98
   1   0   3  265.08    9.75
   1   0   3  281.70   22.99
   1   0   3  294.17   18.87
  -1   0  -3  285.29   20.03
  -1   0  -3  234.16   10.44
  -1   0  -3  309.47   19.75
   1   0   4 3895.12  136.64
   1   0   4 3712.92  114.19
   1   0   4 3749.16  100.15
  -1   0  -4 3736.89  120.08
  -1   0  -4 3944.94  108.99
  -1   0  -4 3706.33  119.49
   1   0   5  378.15   33.68
   1   0   5  332.24   12.85
   1   0   5  331.37   23.30
  -1   0  -5  433.11   26.26
  -1   0  -5  442.59   32.39
  -1   0  -5  327.80   14.77
   1   0   6 3903.57  129.50
   1   0   6 3794.47  109.91
   1   0   6 3759.23  155.23
  -1   0  -6 3699.10  132.69
  -1   0  -6 3928.79  112.48
  -1   0  -6 3914.87  154.59
   1   0   717548.54  964.17
   1   0   714577.37  685.05
   1   0   717379.45  860.05
  -1   0  -717355.60  927.67
  -1   0  -716519.46  844.87
   1   0   8  309.37   19.85
   1   0   8  276.36   48.00
   1   0   8  329.53   29.71
  -1   0  -8  277.04   33.83
  -1   0  -8  333.78   24.39
  -1   0  -8  280.27   44.50
   1   0   9    0.78   27.01
   1   0   9    4.24   21.41
   1   0   9   -1.76   13.75
  -1   0  -9   -6.68   22.43
  -1   0  -9    1.96   27.63
  -1   0  -9   -2.49   11.98
   1   0  10  543.25   43.38
   1   0  10  501.94   32.29
   1   0  10  424.82   79.21
  -1   0 -10  490.42   55.83
  -1   0 -10  634.08   60.14
  -1   0 -10  460.27   35.34
   1   0  11  -16.64   26.98
  -1   0 -11  -12.18   16.69
  -1   0 -11  116.15   37.63
  -1   0 -11   10.67   36.70
   1   0  12 2389.44  129.87
  -1   0 -12 2461.01  179.78
  -1   0 -12 2556.28  141.31
  -1   0 -12 2453.08  113.87
   1   0  13  158.36   44.35
  -1   0 -13   95.76   47.18
  -1   0 -13  101.60   33.69
   1   0  14   12.26   40.64
  -1   0 -14  -20.24   34.03
  -1   0 -14   -6.86   53.79
   1   1 -15   40.72   50.24
   1   1 -15   89.35   36.19
  -1  -1  15  -16.08   48.18
   1   1 -14   82.55   32.09
   1   1 -14  193.27   49.13
  -1  -1  14   93.00   47.48
   1   1 -13  178.17   64.81
   1   1 -13  162.35   29.63
  -1  -1  13   90.91   43.74
   1   1 -12  328.07   56.13
   1   1 -12  280.76   33.49
   1   1 -12  294.14   56.53
  -1  -1  12  287.08   30.39
  -1  -1  12  323.90   44.51
   1   1 -11 3819.76  185.43
   1   1 -11 3764.34  141.07
   1   1 -11 3739.27  191.70
  -1  -1  11 3792.47  167.55
  -1  -1  11 3837.95  131.33
   1   1 -10  426.03   42.72
   1   1 -10  345.28   39.69
   1   1 -10  337.11   25.19
  -1  -1  10  343.99   21.06
  -1  -1  10  292.64   70.76
  -1  -1  10  274.14   36.21
   1   1  -9  723.89   49.50
   1   1  -9  566.39   41.01
   1   1  -9  528.63   27.34
  -1  -1   9  504.30   52.47
  -1  -1   9  510.26   40.20
  -1  -1   9  648.82   23.55
   1   1  -8  562.62   33.49
   1   1  -8  369.02   42.27
   1   1  -8  503.30   24.04
  -1  -1   8  507.56   18.70
  -1  -1   8  440.76   44.12
  -1  -1   8  501.45   33.26
   1   1  -7    5.26   14.99
   1   1  -7    0.11    9.64
   1   1  -7    5.60   25.41
  -1  -1   7   12.38    7.77
  -1  -1   7    3.67   15.95
  -1  -1   7    8.63   21.71
   1   1  -6 7334.41  266.80
   1   1  -6 7092.84  308.14
   1   1  -6 7604.14  248.25
  -1  -1   6 7196.88  266.68
  -1  -1   6 7094.86  294.71
  -1  -1   6 7194.18  227.75
   1   1  -4    8.93    6.41
   1   1  -4   -1.44   10.72
   1   1  -4    9.43   18.90
  -1  -1   4   25.42   13.43
  -1  -1   4    5.43    5.43
  -1  -1   4   27.29   12.30
   1   1  -2  787.24   35.19
   1   1  -2  755.67   21.77
   1   1  -2  712.18   24.38
   1   1  -2  775.21   31.84
  -1  -1   2  806.22   26.23
  -1  -1   2  723.75   24.95
   1   1   1 2826.87   84.97
   1   1   1 2856.12   81.29
   1   1   1 2842.15   62.91
  -1  -1  -1 2669.73   84.04
  -1  -1  -1 2757.66   62.78
  -1  -1  -1 2791.62   85.53
   1   1   3 4924.87  137.80
   1   1   3 5053.56  176.58
   1   1   3 4904.10  165.09
  -1  -1  -3 4903.06  175.41
  -1  -1  -3 5001.09  180.40
  -1  -1  -3 4813.49  133.26
   1   1   4 4062.44  139.49
   1   1   4 3687.28  141.43
   1   1   4 3830.40  100.55
  -1  -1  -4 4076.57  143.93
  -1  -1  -4 3928.23  104.86
  -1  -1  -4 3739.31  138.36
   1   1   6  417.16   20.76
   1   1   6  419.91   46.27
  -1  -1  -6  465.15   38.30
  -1  -1  -6  410.62   18.46
  -1  -1  -6  529.63   43.87
   1   1   7 3749.18  150.60
   1   1   7 3755.21  192.90
   1   1   7 4140.16  127.87
  -1  -1  -7 3864.65  155.88
  -1  -1  -7 3802.10  163.93
  -1  -1  -7 3850.69  119.46
   1   1   8 1933.69   65.43
   1   1   8 1836.17  101.17
   1   1   8 2100.11   89.91
  -1  -1  -8 1890.35  105.50
  -1  -1  -8 2076.22   99.18
  -1  -1  -8 2100.33   63.70
   1   1   9  221.77   32.89
   1   1   9  165.16   45.30
   1   1   9  209.89   22.42
  -1  -1  -9  180.28   35.21
  -1  -1  -9  220.49   44.67
  -1  -1  -9  206.82   25.27
   1   1  10   25.32   57.64
   1   1  10   58.82   32.43
   1   1  10   84.90   17.51
  -1  -1 -10   76.80   33.67
  -1  -1 -10   53.25   43.62
  -1  -1 -10   23.91   20.58
   1   1  11  193.09   46.02
  -1  -1 -11  137.00   64.37
  -1  -1 -11  234.94   25.18
  -1  -1 -11  239.70   59.31
   1   1  12  968.54   80.55
  -1  -1 -12  975.59   63.23
  -1  -1 -12  923.44  116.08
   1   1  13  301.93   61.99
  -1  -1 -13  327.16   50.18
  -1  -1 -13  431.36   64.56
   1   1  14  154.55   55.02
  -1  -1 -14   53.91   41.85
  -1  -1 -14   11.13   74.57
   1   2 -15   52.86   45.80
   1   2 -15    9.32   34.64
  -1  -2  15    8.42   48.81
   1   2 -14  149.48   35.56
   1   2 -14  227.67   52.35
  -1  -2  14  179.03   49.09
   1   2 -13  146.54   46.41
   1   2 -13  202.24   50.52
   1   2 -13  174.80   31.27
  -1  -2  13  179.69   42.78
   1   2 -12 3169.85  132.93
   1   2 -12 3439.93  179.44
   1   2 -12 3309.48  171.28
  -1  -2  12 3430.47  127.26
  -1  -2  12 3296.42  159.75
   1   2 -11 1639.41   86.90
   1   2 -11 1413.90  114.50
   1   2 -11 1557.42   66.04
  -1  -2  11 1568.98   81.97
  -1  -2  11 1535.32   54.64
   1   2 -10  -11.25   24.59
   1   2 -10   -4.01   15.57
   1   2 -10   -2.96   21.61
  -1  -2  10  -11.63   12.08
  -1  -2  10  -25.37   32.28
  -1  -2  10    9.57   21.36
   1   2  -9  770.44   50.90
   1   2  -9  842.98   42.98
   1   2  -9  851.30   34.16
  -1  -2   9  834.81   45.31
  -1  -2   9  833.65   58.43
  -1  -2   9  837.59   27.75
   1   2  -8  274.83   29.77
   1   2  -8  282.05   25.91
   1   2  -8  326.58   19.04
  -1  -2   8  343.72   26.11
  -1  -2   8  257.87   15.32
  -1  -2   8  334.80   35.93
   1   2  -7 1698.05   55.71
   1   2  -7 1737.66   69.01
   1   2  -7 1671.53   50.29
  -1  -2   7 1487.65   72.11
  -1  -2   7 1660.19   61.26
  -1  -2   7 1720.65   43.31
   1   2  -6  527.88   24.92
   1   2  -6  482.90   32.09
   1   2  -6  507.97   21.12
  -1  -2   6  466.74   33.93
  -1  -2   6  543.95   17.57
  -1  -2   6  485.32   26.74
  -1  -2   519431.23 1021.87
   1   2  -4  201.34   16.75
   1   2  -4  146.30   13.25
   1   2  -4  148.37   20.27
  -1  -2   4  125.59    7.96
  -1  -2   4  150.54   20.00
  -1  -2   4  184.12   17.21
   1   2  -3 6114.61  195.23
   1   2  -3 5982.57  212.20
   1   2  -3 6196.10  203.60
  -1  -2   3 5991.53  202.10
  -1  -2   3 6059.90  195.18
  -1  -2   3 6253.65  206.46
   1   2  -2  307.49   22.68
   1   2  -2  216.34   13.52
   1   2  -2  277.35   16.65
  -1  -2   2  272.90   13.39
  -1  -2   2  295.45   17.63
  -1  -2   2  265.12   19.43
   1   2  -1 1415.49   34.35
   1   2  -1 1534.97   56.73
   1   2  -1 1341.97   34.27
  -1  -2   1 1329.67   31.76
  -1  -2   1 1347.44   51.67
  -1  -2   1 1356.76   34.56
   1   2   2 1616.94   59.50
   1   2   2 1610.57   38.99
   1   2   2 1600.55   57.89
  -1  -2  -2 1742.19   62.54
  -1  -2  -2 1779.87   63.48
  -1  -2  -2 1642.66   39.84
   1   2   3 2355.29   62.15
   1   2   3 2247.26   76.83
   1   2   3 2160.54   85.41
  -1  -2  -3 2248.99   56.51
  -1  -2  -3 2373.51   92.14
  -1  -2  -3 2250.97   81.68
   1   2   4    2.77   22.10
   1   2   4   15.22   16.18
   1   2   4   12.37    7.68
  -1  -2  -4   12.63   21.94
  -1  -2  -4   16.57    8.07
  -1  -2  -4   21.44   17.56
   1   2   5 6098.12  200.73
   1   2   5 6136.22  260.83
   1   2   5 5976.98  228.57
  -1  -2  -5 6000.12  192.57
  -1  -2  -5 6017.91  257.45
  -1  -2  -5 5726.72  251.21
   1   2   617170.29  904.68
   1   2   617130.59  980.70
   1   2   618248.72  871.93
  -1  -2  -616915.01  923.04
  -1  -2  -617138.47  933.27
   1   2   7  144.14   43.65
   1   2   7  208.58   20.61
   1   2   7  113.01   35.62
  -1  -2  -7  215.30   16.80
  -1  -2  -7   99.80   42.60
  -1  -2  -7  208.51   39.59
   1   2   8  574.63   51.40
   1   2   8  596.71   27.22
   1   2   8  762.60   57.51
  -1  -2  -8  574.58   33.39
  -1  -2  -8  852.56   65.07
  -1  -2  -8  604.80   67.15
   1   2   9   19.48   20.95
   1   2   9   90.64   30.64
   1   2   9   18.84   50.92
  -1  -2  -9   34.52   40.09
  -1  -2  -9   87.93   42.31
  -1  -2  -9   22.75   15.42
   1   2  10  171.05   40.83
  -1  -2 -10   74.69   52.65
  -1  -2 -10  106.92   50.39
  -1  -2 -10  130.47   25.50
   1   2  11 1420.14  104.05
  -1  -2 -11 1518.81   65.20
  -1  -2 -11 1405.02  127.76
   1   2  12  124.47   53.12
  -1  -2 -12  130.84   25.98
  -1  -2 -12  137.09   62.39
   1   2  13  818.43   96.28
  -1  -2 -13  825.28  116.34
  -1  -2 -13  771.23   69.24
   1   3 -16   11.49   62.48
   1   3 -16  -22.93   65.39
  -1  -3  16  204.78   81.03
   1   3 -15   45.46   58.48
   1   3 -15    3.07   52.57
  -1  -3  15  162.39   73.57
   1   3 -14   31.97   37.85
   1   3 -14   -3.15   40.64
   1   3 -14    3.17   46.14
   1   3 -13  241.95   47.65
   1   3 -13  257.90   61.81
   1   3 -13  182.72   34.04
  -1  -3  13  245.05   29.63
   1   3 -12 3088.42  141.86
   1   3 -12 2847.57  147.17
   1   3 -12 2924.75  123.30
  -1  -3  12 2925.28  101.37
   1   3 -11  743.90   57.95
   1   3 -11  793.86   44.00
   1   3 -11  828.76   53.68
  -1  -3  11  807.47   43.11
  -1  -3  11  834.30   34.23
   1   3 -10   13.08   23.81
   1   3 -10   -1.03   18.17
   1   3 -10   10.47   16.18
  -1  -3  10    6.49   11.30
  -1  -3  10  -22.62   30.99
   1   3  -9 1554.79   73.06
   1   3  -9 1485.94   45.85
   1   3  -9 1556.23   59.20
  -1  -3   9 1532.98   44.62
  -1  -3   9 1444.45   78.93
   1   3  -8  574.88   41.40
   1   3  -8  633.49   29.17
   1   3  -8  667.32   41.17
  -1  -3   8  614.11   42.15
  -1  -3   8  592.01   21.86
   1   3  -728276.31 1813.64
   1   3  -6 3450.65  102.22
   1   3  -6 3476.75  122.04
   1   3  -6 3228.53  112.15
  -1  -3   6 3337.47  131.85
  -1  -3   6 3413.19  118.40
  -1  -3   6 3396.83   92.39
   1   3  -5   40.17   16.81
   1   3  -5   19.00   13.93
   1   3  -5   18.43   10.83
  -1  -3   5    6.78   19.31
  -1  -3   5   -2.20    8.57
  -1  -3   5   13.65   14.48
   1   3  -4    0.94   12.75
   1   3  -4  -12.48   16.85
   1   3  -4   27.21   12.04
  -1  -3   4    4.30   13.78
  -1  -3   4   23.54   12.02
  -1  -3   4    4.24   16.66
   1   3  -3  204.99   13.75
   1   3  -3  229.91   27.69
   1   3  -3  238.48   21.65
  -1  -3   3  236.23   14.40
  -1  -3   3  191.96   16.84
  -1  -3   3  218.82   23.38
   1   3  -2  446.39   20.93
   1   3  -2  529.72   33.51
   1   3  -2  494.08   16.80
  -1  -3   2  496.76   27.96
  -1  -3   2  463.05   23.94
  -1  -3   2  478.26   21.74
   1   3   1  110.29   10.01
   1   3   1   78.77   21.61
  -1  -3  -1   99.52   10.72
  -1  -3  -1  151.10   23.19
  -1  -3  -1   85.80   22.69
   1   3   2  695.87   48.29
   1   3   2  676.54   21.35
   1   3   2  667.37   36.41
  -1  -3  -2  723.37   42.15
  -1  -3  -2  645.08   20.20
  -1  -3  -2  730.53   39.68
   1   3   3   72.73   19.79
   1   3   3   87.89   23.77
   1   3   3   85.86   10.53
  -1  -3  -3  103.30   25.99
  -1  -3  -3   71.73   21.39
  -1  -3  -3   46.13    9.80
   1   3   4 1353.62   61.22
   1   3   4 1395.93   72.66
   1   3   4 1262.14   38.03
  -1  -3  -4 1442.48   40.17
  -1  -3  -4 1388.63   66.08
  -1  -3  -4 1520.91   76.20
   1   3   5 1742.87   76.35
   1   3   5 1650.77   90.15
   1   3   5 1774.33   50.94
  -1  -3  -5 1660.15   95.43
  -1  -3  -5 1612.33   54.56
  -1  -3  -5 1699.20   94.74
   1   3   614433.21  773.90
   1   3   614263.71  659.23
   1   3   614213.69  745.48
  -1  -3  -613812.12  766.55
  -1  -3  -613958.92  632.64
  -1  -3  -614608.64  794.42
   1   3   7   37.79   14.08
   1   3   7   15.85   38.07
   1   3   7   39.46   23.55
  -1  -3  -7   15.85   17.19
  -1  -3  -7   31.76   35.21
  -1  -3  -7   15.14   28.42
   1   3   8  704.56   41.85
   1   3   8  676.76   50.25
   1   3   8  753.62   68.02
  -1  -3  -8  761.27   38.49
  -1  -3  -8  856.87   66.66
  -1  -3  -8  859.26   79.64
   1   3   9  -11.92   50.10
   1   3   9  -20.36   32.28
  -1  -3  -9   20.72   45.32
  -1  -3  -9   -1.94   39.89
  -1  -3  -9    4.71   14.06
   1   3  10   38.51   28.72
  -1  -3 -10  -31.09   45.61
  -1  -3 -10   33.06   24.27
   1   3  11  413.10   52.24
  -1  -3 -11  528.84   62.90
  -1  -3 -11  327.19   34.22
   1   3  12  337.06   57.30
  -1  -3 -12  578.47   93.32
  -1  -3 -12  358.13   48.32
   1   3  13   52.46   55.41
  -1  -3 -13  -14.05   69.46
  -1  -3 -13   23.21   35.88
   1   4 -16  122.25   68.25
  -1  -4  16  -28.42   80.87
   1   4 -15  431.57   76.22
   1   4 -15  433.53   83.51
  -1  -4  15  544.30   99.73
   1   4 -14  926.90   90.03
   1   4 -14 1363.25  109.97
  -1  -4  14  703.36  113.59
   1   4 -13  272.78   52.85
   1   4 -13  231.39   40.86
   1   4 -13  249.25   45.03
  -1  -4  13  163.18   67.30
  -1  -4  13  207.59   29.11
   1   4 -12  368.77   43.47
   1   4 -12  351.50   51.27
   1   4 -12  209.28   36.99
  -1  -4  12  273.31   26.52
  -1  -4  12  311.17   64.19
   1   4 -11  247.93   30.85
   1   4 -11  237.37   41.64
   1   4 -11  259.84   47.44
  -1  -4  11  264.54   20.88
  -1  -4  11  133.34   50.63
   1   4 -10  294.43   37.24
   1   4 -10  207.23   26.24
   1   4 -10  311.58   35.36
  -1  -4  10  304.87   47.52
  -1  -4  10  168.84   42.32
  -1  -4  10  279.83   19.82
   1   4  -9  250.65   32.16
   1   4  -9  208.47   27.87
   1   4  -9  168.21   21.85
  -1  -4   9  188.36   33.13
  -1  -4   9  238.74   39.94
  -1  -4   9  160.21   16.04
   1   4  -8 4756.91  192.17
   1   4  -8 4928.39  186.65
   1   4  -8 4733.50  155.32
  -1  -4   8 4670.36  144.27
  -1  -4   8 4705.71  190.67
  -1  -4   8 4854.09  209.82
   1   4  -7 8071.25  285.75
   1   4  -7 7936.38  312.32
   1   4  -7 7609.58  320.40
  -1  -4   7 6528.08  284.96
  -1  -4   7 8204.52  349.44
  -1  -4   7 8016.01  274.18
   1   4  -610271.73  430.20
   1   4  -610351.02  460.42
   1   4  -610537.03  414.39
  -1  -4   610399.66  398.68
  -1  -4   610918.28  462.73
  -1  -4   610389.83  448.66
   1   4  -5  359.29   24.47
   1   4  -5  288.87   32.05
   1   4  -5  334.92   22.82
  -1  -4   5  308.90   20.73
  -1  -4   5  309.05   24.03
  -1  -4   5  295.21   27.79
   1   4  -4 3577.99  108.58
   1   4  -4 3586.00  129.45
   1   4  -4 3587.58  141.25
  -1  -4   4 3632.93  108.57
  -1  -4   4 3369.51  123.09
  -1  -4   4 3628.41  127.21
   1   4  -3 1523.29   69.56
   1   4  -3 1437.52   46.31
   1   4  -3 1368.77   40.26
  -1  -4   3 1426.51   46.02
  -1  -4   3 1423.02   66.78
  -1  -4   3 1421.59   40.98
   1   4  -2 1259.60   70.44
   1   4  -2 1231.23   42.12
   1   4  -2 1271.25   40.80
  -1  -4   2 1294.28   41.61
  -1  -4   2 1249.25   54.71
  -1  -4   2 1269.84   32.93
   1   4   0 6905.13  230.15
   1   4   0 6918.35  275.05
   1   4   0 6815.74  233.67
  -1  -4   0 6495.98  263.43
  -1  -4   0 6366.67  212.44
  -1  -4   0 6602.18  218.05
   1   4   1   31.36   10.49
   1   4   1   12.48   21.19
  -1  -4  -1   43.03   10.64
  -1  -4  -1   10.27   22.82
  -1  -4  -1   40.74   24.01
  -1  -4  -1   51.22   11.73
   1   4   2 2952.82  113.39
   1   4   2 2907.04   83.94
  -1  -4  -2 2823.42  115.33
  -1  -4  -2 3015.46   93.89
  -1  -4  -2 2955.66  120.44
  -1  -4  -2 2944.72   82.32
   1   4   3   71.21   24.39
   1   4   3   77.02   22.22
   1   4   3   69.57   11.48
  -1  -4  -3   98.27   24.72
  -1  -4  -3   64.98   28.17
  -1  -4  -3   52.25   11.41
   1   4   410061.58  493.28
   1   4   4 9393.21  424.33
   1   4   410420.27  427.15
  -1  -4  -410654.94  514.82
  -1  -4  -410425.51  497.67
  -1  -4  -4 9983.03  388.53
   1   4   5 3398.43  108.48
   1   4   5 3478.80  169.85
   1   4   5 3515.84  150.42
  -1  -4  -5 3333.10  173.25
  -1  -4  -5 3642.45  184.35
  -1  -4  -5 3379.11  108.12
   1   4   6  123.34   36.54
   1   4   6  191.66   32.23
   1   4   6  138.88   18.64
  -1  -4  -6  168.18   17.71
  -1  -4  -6  151.13   34.22
  -1  -4  -6  114.45   37.82
   1   4   7  134.98   56.79
   1   4   7  438.71   39.99
   1   4   7  281.52   23.43
  -1  -4  -7  263.49   56.03
  -1  -4  -7  265.99   21.61
  -1  -4  -7  280.27   51.80
   1   4   8 1109.40   58.79
   1   4   8 1000.29   71.94
   1   4   8 1108.27  105.73
  -1  -4  -8  995.81   50.93
  -1  -4  -8 1002.65   91.48
  -1  -4  -8 1058.41   97.49
   1   4   9   37.46   45.90
  -1  -4  -9   75.09   24.99
  -1  -4  -9   41.25   51.82
   1   4  10 1774.93  130.73
  -1  -4 -10 1667.49  120.01
  -1  -4 -10 1747.70   71.98
   1   4  11  169.76   65.62
  -1  -4 -11  226.50   39.87
  -1  -4 -11  254.23   56.95
   1   4  12   58.13   58.96
  -1  -4 -12    4.56   35.47
  -1  -4 -12   65.62   69.20
   1   5 -16   -2.11   46.94
  -1  -5  16   78.50   71.86
   1   5 -15    4.06   45.21
   1   5 -15   10.29   50.30
  -1  -5  15  -58.09   57.10
   1   5 -14   19.65   31.58
   1   5 -14  -42.53   40.12
   1   5 -13 3768.50  189.83
   1   5 -13 4081.19  211.63
  -1  -5  13 3914.39  240.91
   1   5 -12   11.85   34.28
   1   5 -12   59.76   36.92
   1   5 -12   36.94   23.05
  -1  -5  12   -6.32   16.61
  -1  -5  12   52.79   44.52
   1   5 -11   72.33   35.15
   1   5 -11  125.60   28.42
   1   5 -11   34.72   21.58
  -1  -5  11   50.90   16.84
  -1  -5  11   78.19   41.88
   1   5 -10  294.43   35.62
   1   5 -10  256.02   39.00
   1   5 -10  240.52   28.07
  -1  -5  10  331.75   21.52
  -1  -5  10  237.07   42.94
  -1  -5  10  228.28   45.30
   1   5  -9  178.92   32.06
   1   5  -9  190.23   26.74
   1   5  -9  206.93   19.48
  -1  -5   9  199.42   17.75
  -1  -5   9  137.63   42.55
  -1  -5   9  162.34   31.51
   1   5  -8 6774.66  277.19
   1   5  -8 7050.36  300.99
   1   5  -8 6841.31  244.78
  -1  -5   8 6707.14  236.20
  -1  -5   8 7058.15  294.64
  -1  -5   8 6617.91  279.47
   1   5  -718443.19  982.17
   1   5  -718615.28 1036.69
   1   5  -718920.26  944.74
  -1  -5   718162.42  885.03
  -1  -5   718258.95  975.57
  -1  -5   717324.00  975.39
   1   5  -610971.59  469.85
   1   5  -610485.45  500.84
   1   5  -611258.44  526.54
  -1  -5   610965.35  472.80
  -1  -5   611144.23  475.69
  -1  -5   610295.15  458.42
   1   5  -5 8917.19  382.30
   1   5  -5 8333.24  321.55
   1   5  -5 8862.44  394.10
  -1  -5   5 9131.47  345.78
  -1  -5   5 8251.13  331.70
  -1  -5   5 8406.88  352.41
   1   5  -4  459.04   29.07
   1   5  -4  459.80   44.72
   1   5  -4  403.22   21.64
  -1  -5   4  495.79   36.94
  -1  -5   4  444.90   26.13
  -1  -5   4  379.27   20.18
   1   5  -3 1967.15   93.57
   1   5  -3 2012.31   70.14
   1   5  -3 1973.70   64.08
  -1  -5   3 1889.14   62.45
  -1  -5   3 1850.77   86.72
  -1  -5   3 1984.68   62.12
   1   5  -2 2332.33   97.46
   1   5  -2 2348.74   67.45
   1   5  -2 2434.28   81.49
  -1  -5   2 2428.29   96.60
  -1  -5   2 2480.36   77.65
  -1  -5   2 2491.30   72.69
   1   5  -1   27.37   15.25
   1   5  -1   60.45   13.78
   1   5  -1   27.66   32.17
  -1  -5   1   31.84   12.53
  -1  -5   1   55.90   22.48
  -1  -5   1   52.11   13.25
   1   5   013073.95  643.14
   1   5   013100.57  574.98
  -1  -5   013621.33  700.35
  -1  -5   013280.16  573.52
   1   5   1 1730.86   53.80
   1   5   1 1597.77   76.88
  -1  -5  -1 1754.90   54.32
  -1  -5  -1 1713.00   53.18
  -1  -5  -1 1826.01   83.31
  -1  -5  -1 1861.04   82.49
   1   5   2 1393.20   66.98
   1   5   2 1439.98   46.76
  -1  -5  -2 1391.07   75.92
  -1  -5  -2 1338.65   41.58
  -1  -5  -2 1336.19   46.80
  -1  -5  -2 1276.38   72.91
   1   5   3 2426.98  104.69
   1   5   3 2336.94   75.64
  -1  -5  -3 2585.17  127.32
  -1  -5  -3 2657.56   80.87
  -1  -5  -3 2549.50   77.70
  -1  -5  -3 2523.62  118.09
   1   5   4  271.82   27.12
   1   5   4  271.42   36.66
  -1  -5  -4  190.74   47.30
  -1  -5  -4  239.28   24.47
  -1  -5  -4  200.26   40.62
   1   5   5 3569.10  192.98
   1   5   5 3525.65  122.11
   1   5   5 3585.41  179.73
  -1  -5  -5 3910.25  202.22
  -1  -5  -5 3807.63  135.98
  -1  -5  -5 3522.20  178.89
   1   5   6  693.81   45.30
   1   5   6  664.88   59.35
   1   5   6  831.20   72.52
  -1  -5  -6  806.41   90.90
  -1  -5  -6  803.94   77.70
  -1  -5  -6  796.75   41.82
   1   5   7  170.69   46.64
   1   5   7  176.01   56.59
   1   5   7  142.77   23.54
  -1  -5  -7  197.14   26.17
  -1  -5  -7  180.97   56.83
   1   5   8   19.41   33.99
   1   5   8   31.08   45.98
  -1  -5  -8   46.11   17.94
  -1  -5  -8   66.25   41.15
   1   5   9   77.89   50.74
  -1  -5  -9   73.04   58.43
  -1  -5  -9   75.04   27.21
   1   5  10  896.10   98.59
  -1  -5 -10  616.96   55.07
  -1  -5 -10  602.91  102.77
   1   5  11  293.59   86.97
  -1  -5 -11  505.30   98.69
  -1  -5 -11  414.39   48.74
  -1  -5 -12  -15.67   39.63
  -1  -5 -12  -63.88   79.63
   1   6 -16   54.11   52.66
  -1  -6  16  199.29   82.55
   1   6 -15   -9.54   37.35
   1   6 -15   32.09   46.25
  -1  -6  15   -2.89   60.17
   1   6 -14  265.67   78.51
   1   6 -14  397.21   55.81
  -1  -6  14  354.65   78.40
   1   6 -13 2143.52  146.22
   1   6 -13 1940.17  110.37
  -1  -6  13 1929.59  149.39
   1   6 -12  140.51   29.53
   1   6 -12  197.28   57.82
   1   6 -12  347.67   41.58
  -1  -6  12  285.70   57.09
  -1  -6  12  234.93   27.04
   1   6 -11  -22.10   28.47
   1   6 -11    5.04   16.17
   1   6 -11  -12.33   23.70
  -1  -6  11   20.87   15.38
  -1  -6  11  -41.25   36.34
   1   6 -10   30.10   17.56
   1   6 -10   19.46   23.72
   1   6 -10   46.18   31.64
  -1  -6  10   16.46   15.27
  -1  -6  10   15.62   29.70
  -1  -6  10   35.30   33.46
   1   6  -9 1247.97   63.35
   1   6  -9 1308.13   49.54
   1   6  -9 1425.09   78.70
  -1  -6   9 1226.45   46.58
  -1  -6   9 1239.78   80.79
  -1  -6   9 1336.09   68.53
   1   6  -8 3975.68  134.50
   1   6  -8 4136.08  182.60
   1   6  -8 4047.43  153.58
  -1  -6   8 3934.49  132.28
  -1  -6   8 3994.22  184.85
  -1  -6   8 4173.31  160.70
   1   6  -7 7639.46  342.15
   1   6  -7 7438.58  295.71
   1   6  -7 7478.53  349.34
  -1  -6   7 7455.30  300.41
  -1  -6   7 7253.31  297.37
  -1  -6   7 7011.74  315.24
   1   6  -6  363.54   44.02
   1   6  -6  422.28   43.47
   1   6  -6  362.38   30.93
  -1  -6   6  411.94   34.95
  -1  -6   6  377.82   26.33
  -1  -6   6  289.18   35.29
   1   6  -5  961.49   43.44
   1   6  -5  871.98   57.69
   1   6  -5  842.66   63.82
  -1  -6   5  970.55   42.05
  -1  -6   5  928.23   37.15
  -1  -6   5  874.26   56.29
   1   6  -4   72.80   20.11
   1   6  -4   62.25   27.29
   1   6  -4   87.18   25.42
  -1  -6   4   79.38   29.48
  -1  -6   4   90.34   14.63
  -1  -6   4   68.03   17.16
   1   6  -3 1885.54   84.76
   1   6  -3 2057.04   73.44
   1   6  -3 1943.09   71.51
  -1  -6   3 2022.09   59.13
  -1  -6   3 1962.73   67.49
  -1  -6   3 1862.16   98.69
   1   6  -223011.57 1401.47
   1   6  -223598.30 1353.66
  -1  -6   222358.25 1365.54
  -1  -6   222724.02 1276.66
   1   6  -1  956.50   58.84
   1   6  -1  893.26   40.07
   1   6  -1  881.07   40.42
  -1  -6   1  909.16   55.33
  -1  -6   1  885.42   35.23
  -1  -6   1  878.64   43.13
   1   6   0  752.97   54.59
   1   6   0  739.62   38.69
   1   6   0  719.40   35.29
  -1  -6   0  784.14   53.78
  -1  -6   0  739.48   31.58
  -1  -6   0  726.21   32.20
   1   6   1   74.19   30.33
   1   6   1   95.25   17.02
  -1  -6  -1  107.15   32.37
  -1  -6  -1   85.02   19.03
  -1  -6  -1   83.24   32.55
  -1  -6  -1   79.18   17.89
   1   6   2   88.15   32.86
   1   6   2  115.49   23.78
  -1  -6  -2  131.99   17.19
  -1  -6  -2  174.21   37.13
  -1  -6  -2  152.12   38.01
  -1  -6  -2  133.04   21.05
   1   6   3 4671.07  161.84
   1   6   3 4754.80  204.80
  -1  -6  -3 4248.86  159.96
  -1  -6  -3 4924.13  234.66
  -1  -6  -3 4485.84  153.89
  -1  -6  -3 4478.18  214.68
   1   6   4 9102.01  376.23
   1   6   4 8574.40  425.74
  -1  -6  -4 8468.66  441.40
  -1  -6  -4 8958.39  385.95
  -1  -6  -4 8854.75  466.56
  -1  -6  -4 8463.73  341.99
   1   6   5 3535.65  177.25
   1   6   5 3499.63  144.66
  -1  -6  -5 3425.61  145.28
  -1  -6  -5 3289.19  191.90
  -1  -6  -5 3420.94  222.64
  -1  -6  -5 3531.15  132.43
   1   6   6  455.77   65.95
  -1  -6  -6  382.57   26.42
  -1  -6  -6  393.10   71.68
   1   6   7   38.20   34.46
   1   6   7    2.03   49.86
  -1  -6  -7   11.45   21.59
  -1  -6  -7   13.97   48.56
   1   6   8  329.49   59.17
  -1  -6  -8  370.46   30.53
  -1  -6  -8  442.87   81.74
   1   6   9  376.01   80.39
  -1  -6  -9  367.07   46.73
  -1  -6  -9  471.69   90.02
   1   6  10   16.60   52.55
  -1  -6 -10   -7.40   62.05
  -1  -6 -10   -4.66   26.47
   1   6  11  198.77   76.94
  -1  -6 -11   45.75   34.38
  -1  -6 -11  425.69   93.32
   1   7 -16  201.24   73.21
  -1  -7  16  146.79   92.64
   1   7 -15 1630.41  141.35
   1   7 -15 1234.35  104.25
  -1  -7  15 1480.55  159.48
   1   7 -14  357.71   82.25
   1   7 -14  405.38   60.16
  -1  -7  14  597.98   90.04
   1   7 -13  333.47   71.63
   1   7 -13  310.47   50.28
  -1  -7  13  509.56   71.71
   1   7 -12   45.06   30.17
   1   7 -12   62.36   26.99
   1   7 -12   31.10   47.46
  -1  -7  12   60.76   45.17
  -1  -7  12   56.49   21.78
   1   7 -11   81.92   44.71
   1   7 -11   25.57   36.46
   1   7 -11   61.95   20.22
  -1  -7  11   89.98   41.98
  -1  -7  11   48.24   19.33
   1   7 -10  597.24   69.96
   1   7 -10  509.72   42.11
   1   7 -10  553.29   35.04
  -1  -7  10  521.65   35.51
  -1  -7  10  668.86   50.41
   1   7  -9 8305.17  387.71
   1   7  -9 8112.39  321.64
   1   7  -9 8153.90  390.27
  -1  -7   9 7877.14  359.13
  -1  -7   9 7804.74  322.15
  -1  -7   9 8267.31  371.19
   1   7  -8   88.79   35.88
   1   7  -8   78.89   30.52
  -1  -7   8   88.25   14.86
  -1  -7   8  111.20   25.88
  -1  -7   8   68.76   33.98
  -1  -7   8   53.18   23.56
   1   7  -7  169.85   46.34
   1   7  -7  216.94   26.01
   1   7  -7  232.59   41.42
  -1  -7   7  174.62   31.74
  -1  -7   7  211.17   24.23
  -1  -7   7  219.41   30.18
   1   7  -6   -9.26   22.32
   1   7  -6    5.76   29.40
   1   7  -6    5.53   16.51
  -1  -7   6   16.13   22.65
  -1  -7   6    0.95   24.71
  -1  -7   6   13.43   15.48
   1   7  -5  393.28   49.36
   1   7  -5  404.07   25.19
   1   7  -5  448.41   37.02
  -1  -7   5  369.65   45.82
  -1  -7   5  363.27   25.40
  -1  -7   5  476.62   29.56
   1   7  -4  121.78   19.00
   1   7  -4  111.49   24.75
   1   7  -4  106.18   39.01
  -1  -7   4  145.44   20.63
  -1  -7   4  121.33   20.61
  -1  -7   4  104.25   39.84
   1   7  -3 5435.47  207.38
   1   7  -3 4981.22  244.37
   1   7  -3 5142.85  192.89
  -1  -7   3 5116.79  248.65
  -1  -7   3 5157.85  203.98
  -1  -7   3 5124.70  170.27
   1   7  -2 4446.94  181.59
   1   7  -2 4325.77  215.09
   1   7  -2 4488.15  165.73
  -1  -7   2 4539.06  162.83
  -1  -7   2 4389.02  142.03
  -1  -7   2 4308.33  193.99
   1   7  -1 4653.19  162.84
   1   7  -1 4780.93  212.63
   1   7  -1 4950.40  180.54
  -1  -7   1 4851.46  167.26
  -1  -7   1 4796.84  168.80
  -1  -7   1 4801.86  245.29
   1   7   0  115.89   22.17
   1   7   0  199.08   36.86
  -1  -7   0  163.16   20.05
  -1  -7   0  241.31   38.63
  -1  -7   0  145.60   21.50
   1   7   1   28.94   35.34
   1   7   1   46.02   17.56
  -1  -7  -1   40.43   17.37
  -1  -7  -1   48.59   16.30
  -1  -7  -1   38.40   35.67
  -1  -7  -1   90.44   34.04
   1   7   2  421.28   46.35
   1   7   2  464.23   37.62
  -1  -7  -2  420.58   25.73
  -1  -7  -2  417.86   45.34
  -1  -7  -2  350.17   54.89
  -1  -7  -2  364.93   31.38
   1   7   3 1108.53   50.69
   1   7   3 1224.22   77.97
  -1  -7  -3 1081.97   94.59
  -1  -7  -3 1094.04   46.88
  -1  -7  -3 1171.57  101.52
  -1  -7  -3 1086.70   54.74
   1   7   4 5316.58  213.46
   1   7   4 5465.23  262.66
  -1  -7  -4 5175.11  215.17
  -1  -7  -4 5571.99  306.20
  -1  -7  -4 5446.76  301.81
  -1  -7  -4 5116.48  192.58
   1   7   5  170.64   41.38
  -1  -7  -5  167.76   59.83
  -1  -7  -5  142.95   21.97
  -1  -7  -5  115.29   33.73
   1   7   6  -26.87   33.46
  -1  -7  -6  -21.31   29.79
  -1  -7  -6   58.68   48.24
  -1  -7  -6    3.24   21.72
   1   7   7    9.34   34.98
  -1  -7  -7   12.94   26.19
  -1  -7  -7    8.11   55.77
   1   7   8   -4.21   40.79
  -1  -7  -8   15.15   20.47
  -1  -7  -8   39.65   60.23
   1   7   9 1134.99  107.22
  -1  -7  -9 1169.18  158.19
  -1  -7  -9 1079.41   77.19
   1   7  10    5.54   47.28
  -1  -7 -10   62.79   36.75
  -1  -7 -10    0.41   82.58
  -1  -8  16  296.64   98.81
   1   8 -15    1.39   36.90
  -1  -8  15   31.42   57.26
   1   8 -14  862.40   85.48
   1   8 -14  711.78   93.25
  -1  -8  14  865.08   82.21
   1   8 -13  -16.40   24.38
   1   8 -13  256.01   37.33
   1   8 -13  188.88   46.45
  -1  -8  13  153.56   56.00
   1   8 -12   25.01   28.83
   1   8 -12   69.32   40.78
   1   8 -12   56.11   35.20
  -1  -8  12   46.20   36.56
   1   8 -11   32.54   44.70
   1   8 -11   25.18   25.99
   1   8 -11   14.62   19.47
  -1  -8  11    1.73   28.96
  -1  -8  11   25.26   15.49
   1   8 -10  157.10   44.41
   1   8 -10  170.96   30.50
   1   8 -10  110.07   25.29
  -1  -8  10  144.04   27.80
  -1  -8  10  235.63   37.74
   1   8  -9 2934.68  144.21
   1   8  -9 3056.42  159.33
  -1  -8   9 3028.65  135.68
  -1  -8   9 3227.64  111.02
  -1  -8   9 3252.09  144.35
   1   8  -8 6123.77  291.55
   1   8  -8 5580.01  234.17
   1   8  -8 6051.21  323.76
  -1  -8   8 6189.50  270.92
  -1  -8   8 5801.91  246.63
  -1  -8   8 5922.64  251.82
   1   8  -7   74.53   26.68
   1   8  -7   91.89   40.04
   1   8  -7   43.24   35.44
  -1  -8   7   30.64   31.56
  -1  -8   7   46.35   20.50
  -1  -8   7    7.17   30.92
   1   8  -6  435.84   41.50
   1   8  -6  651.29   62.74
   1   8  -6  619.11   59.35
  -1  -8   6  456.15   31.11
  -1  -8   6  463.59   37.58
  -1  -8   6  540.64   52.70
   1   8  -5  291.57   26.96
   1   8  -5  330.53   35.79
   1   8  -5  296.96   49.99
  -1  -8   5  245.18   35.34
  -1  -8   5  284.43   48.48
  -1  -8   5  299.34   23.54
   1   8  -4 1521.20   88.61
   1   8  -4 1526.99   60.93
   1   8  -4 1450.01   81.55
  -1  -8   4 1453.43   55.66
  -1  -8   4 1548.00   99.40
  -1  -8   4 1496.55   65.85
   1   8  -317029.14  886.37
   1   8  -317114.13  937.33
   1   8  -317439.90 1047.15
  -1  -8   317658.41  882.24
  -1  -8   316445.64  960.06
  -1  -8   317471.97  910.10
   1   8  -2 1649.24   75.15
   1   8  -2 1612.00   74.26
   1   8  -2 1559.67  112.87
  -1  -8   2 1644.68   97.50
  -1  -8   2 1872.69   69.13
  -1  -8   2 1605.46   62.97
   1   8  -1 1317.98   60.26
   1   8  -1 1133.02   76.71
   1   8  -1 1215.99   63.68
  -1  -8   1 1266.33   52.80
  -1  -8   1 1183.14   43.23
  -1  -8   1 1145.37   82.88
   1   8   0  962.88   67.60
   1   8   0  863.28   49.08
  -1  -8   0  921.59   43.58
  -1  -8   0 1058.55   82.22
  -1  -8   0  968.24   45.90
  -1  -8   0 1011.04   79.64
   1   8   1  104.11   24.61
   1   8   1  118.64   38.83
  -1  -8  -1  139.03   24.15
  -1  -8  -1  111.78   21.51
  -1  -8  -1  109.47   46.89
  -1  -8  -1   94.80   44.49
   1   8   2 5036.30  216.92
   1   8   2 5367.30  306.74
  -1  -8  -2 5592.34  225.83
  -1  -8  -2 5435.15  206.14
  -1  -8  -2 5459.30  293.13
  -1  -8  -2 5638.82  301.76
   1   8   3  322.54   51.63
  -1  -8  -3  388.39   38.96
  -1  -8  -3  345.04   74.25
  -1  -8  -3  417.77   31.81
   1   8   4    8.30   34.47
  -1  -8  -4    7.92   17.17
  -1  -8  -4    7.46   24.04
  -1  -8  -4  -23.86   47.97
   1   8   5  157.32   54.95
  -1  -8  -5  110.66   36.77
  -1  -8  -5  147.93   65.63
  -1  -8  -5   85.85   29.73
   1   8   6  193.41   63.69
  -1  -8  -6  190.37   73.22
  -1  -8  -6  160.11   34.66
   1   8   7  100.04   46.66
  -1  -8  -7   82.05   70.27
  -1  -8  -7   70.89   33.09
   1   8   8  906.47   92.17
  -1  -8  -8  800.60  136.18
  -1  -8  -8  717.90   50.28
   1   8   9  525.65  103.27
  -1  -8  -9  439.04   62.01
  -1  -8  -9  498.30  131.63
   1   9 -15 2199.03  144.24
  -1  -9  15 2176.96  205.18
   1   9 -14  376.36   60.60
   1   9 -14  600.30   85.29
  -1  -9  14  609.74   85.54
   1   9 -13    2.31   32.79
   1   9 -13   50.96   50.88
  -1  -9  13   57.65   47.85
   1   9 -12   94.89   44.66
   1   9 -12   72.29   32.05
   1   9 -12   13.40   29.88
  -1  -9  12   52.04   48.76
   1   9 -11  418.58   44.05
   1   9 -11  490.47   60.47
   1   9 -11  413.84   43.24
  -1  -9  11  529.08   67.72
   1   9 -10 1597.98   70.72
   1   9 -10 1426.00  105.08
   1   9 -10 1336.48   73.98
  -1  -9  10 1307.95  106.92
   1   9  -9  383.30   57.69
   1   9  -9  325.37   37.14
   1   9  -9  419.68   55.24
  -1  -9   9  331.97   47.11
  -1  -9   9  403.68   52.83
   1   9  -8 2340.16  101.43
   1   9  -8 2322.22  137.59
   1   9  -8 2675.70  172.93
  -1  -9   8 2619.92  134.16
  -1  -9   8 2631.30  129.45
  -1  -9   8 2386.02  112.67
   1   9  -7    1.99   32.78
   1   9  -7   15.59   37.55
   1   9  -7   24.07   26.75
  -1  -9   7   28.31   34.09
  -1  -9   7    4.33   22.13
  -1  -9   7   28.54   23.29
   1   9  -6   -5.42   25.13
   1   9  -6   19.56   30.06
   1   9  -6   19.63   36.30
  -1  -9   6  -10.46   28.17
  -1  -9   6   26.63   35.74
  -1  -9   6   11.39   19.07
   1   9  -5 1089.08   65.62
   1   9  -5 1039.58   50.17
   1   9  -5  852.28   80.15
  -1  -9   5  932.51   48.23
  -1  -9   5  918.42   53.56
  -1  -9   5  984.66   88.03
   1   9  -4  447.81   61.97
   1   9  -4  530.53   33.52
   1   9  -4  418.64   58.88
  -1  -9   4  383.19   68.59
  -1  -9   4  361.18   36.41
  -1  -9   4  461.86   31.30
   1   9  -3 7752.21  374.01
   1   9  -3 7682.29  336.51
   1   9  -3 7126.15  384.22
  -1  -9   3 6979.21  360.07
  -1  -9   3 7406.14  292.84
  -1  -9   3 7453.50  310.33
   1   9  -2 1140.90   67.78
   1   9  -2 1328.98   83.11
   1   9  -2 1204.07  103.43
  -1  -9   2 1256.52   50.44
  -1  -9   2 1280.20  124.53
  -1  -9   2 1291.37   58.70
   1   9  -1   80.19   40.47
   1   9  -1  138.48   26.08
   1   9  -1  115.23   28.75
  -1  -9   1  111.43   25.41
  -1  -9   1  113.37   62.26
  -1  -9   1  138.48   23.65
   1   9   0  183.51   32.97
   1   9   0  116.63   42.85
  -1  -9   0  123.28   57.53
  -1  -9   0  203.58   25.66
  -1  -9   0  225.09   30.02
  -1  -9   0  289.57   53.87
   1   9   1  517.22   53.19
  -1  -9  -1  435.02   38.15
  -1  -9  -1  317.11   30.37
  -1  -9  -1  541.88   58.57
   1   9   2  835.39   75.63
  -1  -9  -2  888.99   56.55
  -1  -9  -2  871.84   47.19
  -1  -9  -2 1068.94   99.46
   1   9   3 3581.99  197.44
  -1  -9  -3 3398.34  155.52
  -1  -9  -3 3690.45  139.00
  -1  -9  -3 3853.63  250.26
   1   9   4   -0.28   35.02
  -1  -9  -4   22.05   54.78
  -1  -9  -4    6.72   18.80
   1   9   5  188.47   69.03
  -1  -9  -5  171.23   27.06
  -1  -9  -5  191.29   75.85
   1   9   6  -13.50   42.91
  -1  -9  -6   21.47   22.75
  -1  -9  -6   36.84   67.99
   1   9   7  200.48   69.40
  -1  -9  -7  102.25   42.02
  -1  -9  -7    2.00   93.49
   1   9   8   43.45   58.38
  -1  -9  -8   94.00   29.77
  -1  -9  -8  -76.57   94.06
   1  10 -15   75.37   48.51
  -1 -10  15   62.37   60.16
   1  10 -14  153.04   48.93
  -1 -10  14  230.98   55.30
   1  10 -13   13.95   32.71
   1  10 -13   49.27   50.40
  -1 -10  13   31.01   51.05
   1  10 -12   29.16   28.32
   1  10 -12   28.63   42.29
   1  10 -12   17.79   24.14
  -1 -10  12   15.02   45.06
   1  10 -11  507.89   70.84
   1  10 -11  411.96   64.20
  -1 -10  11  575.87   72.74
   1  10 -10 4198.51  227.62
   1  10 -10 4222.28  216.54
  -1 -10  10 3937.56  195.93
  -1 -10  10 4185.05  236.27
   1  10  -9 1469.88   90.97
   1  10  -9 1443.61  107.88
  -1 -10   9 1584.75   99.47
  -1 -10   9 1526.10   97.66
   1  10  -8   39.25   23.10
   1  10  -8   16.86   40.57
  -1 -10   8    2.42   36.59
  -1 -10   8    2.03   27.49
   1  10  -7   76.37   42.95
   1  10  -7  106.80   34.32
   1  10  -7   52.37   45.42
  -1 -10   7   45.21   29.54
  -1 -10   7   42.21   47.16
   1  10  -6   63.95   42.00
   1  10  -6  -10.81   49.37
   1  10  -6   28.73   22.13
  -1 -10   6   46.83   22.30
  -1 -10   6   13.96   45.64
  -1 -10   6   18.09   24.19
   1  10  -5  466.58   38.22
   1  10  -5  526.25   59.40
   1  10  -5  726.52   75.81
  -1 -10   5  459.69   39.91
  -1 -10   5  450.62   47.18
  -1 -10   5  509.53   80.26
   1  10  -4 8675.63  414.12
   1  10  -4 8704.82  488.79
   1  10  -4 9016.93  497.80
  -1 -10   4 8694.95  388.56
  -1 -10   4 8247.23  462.13
  -1 -10   4 8925.15  406.40
   1  10  -3  237.79   49.31
   1  10  -3  237.17   41.10
  -1 -10   3  217.46   77.69
  -1 -10   3  301.48   27.12
  -1 -10   3  332.88   40.38
   1  10  -2  606.12   59.15
   1  10  -2  473.13   40.06
  -1 -10   2  497.28   36.79
  -1 -10   2  403.38   43.01
  -1 -10   2  531.50   78.33
   1  10  -1   73.96   29.22
   1  10  -1   70.05   39.04
  -1 -10   1  131.88   22.91
  -1 -10   1   34.30   31.21
   1  10   0  211.87   67.36
  -1 -10   0  252.92   37.99
  -1 -10   0  231.92   27.62
  -1 -10   0  227.31   62.76
   1  10   1  424.51   64.22
  -1 -10  -1  506.74   87.75
  -1 -10  -1  504.63   45.30
  -1 -10  -1  470.86   38.15
   1  10   2  391.87   71.20
  -1 -10  -2  491.51   91.73
  -1 -10  -2  605.11   41.66
   1  10   3 1019.34   97.71
  -1 -10  -3 1073.32   57.81
  -1 -10  -3  857.62  121.82
   1  10   4   83.66   67.77
  -1 -10  -4  105.21   26.69
  -1 -10  -4   13.96   72.50
   1  10   5    0.58   42.14
  -1 -10  -5   -1.47   70.08
  -1 -10  -5  -16.43   22.92
   1  10   6   86.03   60.68
  -1 -10  -6  164.51   32.42
  -1 -10  -6    6.79   90.94
   1  10   7  -56.96   70.53
  -1 -10  -7 -190.03   95.67
  -1 -10  -7  -20.47   39.36
  -1 -11  15   51.76   73.72
   1  11 -14   71.50   49.81
  -1 -11  14  313.59   70.79
   1  11 -13   -0.89   40.47
   1  11 -13   -5.06   32.95
  -1 -11  13   -7.26   50.81
   1  11 -12   24.37   43.03
   1  11 -12    1.51   31.33
  -1 -11  12   15.50   46.38
   1  11 -11 1723.04   94.87
   1  11 -11 1865.37  136.38
  -1 -11  11 1758.80  131.21
   1  11 -10  279.86   63.10
   1  11 -10  208.35   50.82
  -1 -11  10  255.80   54.13
  -1 -11  10  172.56   54.82
   1  11  -9  949.54   60.15
   1  11  -9  752.93   90.97
  -1 -11   9 1091.68   91.69
  -1 -11   9  842.12   80.11
   1  11  -8  -10.69   25.22
   1  11  -8   13.54   41.48
  -1 -11   8    8.38   27.45
  -1 -11   8  -53.08   45.53
   1  11  -7    9.69   31.88
   1  11  -7   26.64   43.16
  -1 -11   7    2.70   54.49
  -1 -11   7   17.90   25.24
   1  11  -6  252.91   35.97
   1  11  -6  237.53   66.90
  -1 -11   6  193.47   70.04
  -1 -11   6  317.56   48.10
   1  11  -5   93.27   53.79
   1  11  -5  145.29   37.82
  -1 -11   5  141.03   31.57
  -1 -11   5  147.00   72.43
   1  11  -4 2483.58  178.12
   1  11  -4 2396.73  112.52
  -1 -11   4 2568.55  109.59
  -1 -11   4 2618.61  179.07
   1  11  -3  960.30   85.68
   1  11  -3  966.56   57.97
  -1 -11   3 1031.40   57.97
   1  11  -2   23.81   40.34
   1  11  -2   31.25   40.52
  -1 -11   2   78.06   25.25
   1  11  -1   81.58   45.13
  -1 -11   1   73.57   60.77
  -1 -11   1   76.27   24.91
   1  11   0  244.50   55.79
  -1 -11   0  337.44   73.21
  -1 -11   0  214.39   34.04
   1  11   1  859.32  121.73
  -1 -11  -1 1412.27  131.66
  -1 -11  -1 1085.81   61.43
   1  11   2 1114.94  128.39
  -1 -11  -2  960.33  143.44
  -1 -11  -2 1143.12   63.04
   1  11   3   89.52   69.96
  -1 -11  -3  105.67   77.41
  -1 -11  -3  137.39   59.52
  -1 -11  -3   86.92   29.52
   1  11   4   77.47   73.66
  -1 -11  -4   58.50   88.68
  -1 -11  -4  110.76   37.98
   1  11   5  236.03   64.21
  -1 -11  -5  205.19  107.41
  -1 -11  -5  153.51   34.56
  -1 -11  -6  153.59   94.71
  -1 -11  -6  -46.66   35.95
   1  12 -14   83.01   43.27
  -1 -12  14   13.62   67.12
   1  12 -13   51.39   39.23
  -1 -12  13   21.27   42.71
   1  12 -12   -1.52   47.54
   1  12 -12   30.58   34.20
  -1 -12  12   30.89   40.08
   1  12 -11  495.23   72.99
   1  12 -11  524.14   78.61
   1  12 -10 1684.11  136.45
   1  12 -10 1556.47   97.64
  -1 -12  10 1458.97  101.83
  -1 -12  10 1619.21  135.12
   1  12  -9  457.60   65.05
   1  12  -9  337.60   80.19
  -1 -12   9  430.86   63.06
  -1 -12   9  470.67   87.20
   1  12  -8  242.61   39.97
   1  12  -8  216.32   65.61
  -1 -12   8  114.66   40.50
  -1 -12   8  241.25   71.68
   1  12  -7  170.26   60.11
   1  12  -7  203.90   36.48
  -1 -12   7  195.06   48.48
  -1 -12   7  109.93   78.36
   1  12  -6 1645.56  144.52
   1  12  -6 1944.56  121.77
  -1 -12   6 1858.36  110.85
   1  12  -5  838.59   80.42
   1  12  -5  967.96  108.56
  -1 -12   5  868.89   59.59
   1  12  -4    9.91   28.00
   1  12  -4   76.83   40.56
  -1 -12   4   18.74   25.19
   1  12  -3  427.98   60.75
   1  12  -3  457.53   80.65
  -1 -12   3  416.91   39.72
   1  12  -2   82.23   50.78
   1  12  -2  165.24   39.12
  -1 -12   2  145.13   37.13
   1  12  -1  -30.15   53.69
  -1 -12   1   -0.63   57.43
  -1 -12   1   17.45   23.61
   1  12   0  911.98   98.24
  -1 -12   0  811.94  131.05
  -1 -12   0  964.20   75.87
   1  12   1   71.24   46.61
  -1 -12  -1   -8.27   24.33
  -1 -12  -1   12.43   65.61
   1  12   2  245.51   82.42
  -1 -12  -2  218.92   47.65
  -1 -12  -2  120.60   99.07
   1  12   3   32.57   57.60
  -1 -12  -3  131.56   96.20
  -1 -12  -3   98.72   32.58
   1  12   4  -58.23   54.82
  -1 -12  -4   47.43   30.49
  -1 -12  -4   76.52   93.38
   1  13 -13   46.15   54.92
  -1 -13  13   49.76   60.26
   1  13 -12  251.21   70.56
   1  13 -12  240.00   89.75
  -1 -13  12  309.23   56.99
   1  13 -11   44.59   53.93
   1  13 -11   18.20   48.15
  -1 -13  11   17.15   39.82
   1  13 -10  462.65   63.59
   1  13 -10  624.35   98.70
  -1 -13  10  660.08   64.68
   1  13  -9    4.48   38.60
   1  13  -9   40.66   48.28
  -1 -13   9  -23.12   32.93
   1  13  -8   56.05   35.02
   1  13  -8   29.23   62.03
  -1 -13   8   53.46   35.83
   1  13  -7  239.29   42.53
   1  13  -7  109.33   70.00
  -1 -13   7  113.56   51.78
   1  13  -6   78.46   35.33
   1  13  -6  110.54   48.96
  -1 -13   6   95.17   34.98
   1  13  -5 2381.81  158.58
   1  13  -5 2500.45  202.33
  -1 -13   5 2296.13  120.73
   1  13  -4  207.72   77.40
   1  13  -4  239.66   59.75
  -1 -13   4  235.05   40.13
   1  13  -3   36.81   47.11
   1  13  -3   26.17   61.29
  -1 -13   3   19.45   28.07
   1  13  -2   33.20   55.45
  -1 -13   2   -9.97   25.00
  -1 -13   2   18.37   48.06
   1  13  -1   10.83   63.95
  -1 -13   1   38.81   69.79
  -1 -13   1   17.76   28.55
   1  13   0  480.23   77.55
  -1 -13   0  557.22  106.80
  -1 -13   0  253.79   43.78
   1  13   1  843.22  100.46
  -1 -13  -1  665.47   59.11
  -1 -13  -1  838.10  150.34
   1  13   2   59.94   81.52
  -1 -13  -2   77.10   34.05
  -1 -13  -2  140.60  105.57
  -1 -14  12 1342.23  144.81
   1  14 -11  -14.18   60.10
   1  14 -11   49.55   38.62
  -1 -14  11  -13.97   56.16
   1  14 -10  -40.49   37.63
   1  14 -10    2.30   61.02
  -1 -14  10    7.62   36.90
   1  14  -9   64.21   61.20
   1  14  -9  302.53   72.68
  -1 -14   9  167.05   61.62
   1  14  -8  -29.95   51.33
   1  14  -8   55.35   67.88
  -1 -14   8   64.45   36.33
   1  14  -7  212.47   87.55
   1  14  -7  314.60   67.23
  -1 -14   7  251.96   48.55
   1  14  -6 1112.14  148.93
   1  14  -6 1469.98   99.53
  -1 -14   6 1271.12  106.63
   1  14  -5   64.39   46.09
   1  14  -5  102.65   75.10
  -1 -14   5  126.55   36.92
   1  14  -4  148.03   47.53
   1  14  -4  237.38   84.20
  -1 -14   4  116.40   38.75
   1  14  -3  -21.55   49.85
  -1 -14   3  -11.80   29.75
   1  14  -2  -38.50   53.34
  -1 -14   2   -1.02   38.72
  -1 -14   2  -61.67   79.14
   1  14  -1  166.84   86.02
  -1 -14   1  123.36  107.99
  -1 -14   1  118.64   39.40
   1  14   0   -9.41   76.42
  -1 -14   0 -102.18   92.22
  -1 -14   0   -2.25   30.59
   1  15  -9   13.33   41.61
   1  15  -9   -3.43   69.67
  -1 -15   9    8.75   37.04
   1  15  -8   74.99   77.78
   1  15  -8   39.65   45.93
  -1 -15   8   42.87   53.58
   1  15  -7   22.09   58.54
   1  15  -7   77.36   73.02
  -1 -15   7   38.88   38.81
   1  15  -6  644.75  129.56
   1  15  -6  563.72   77.76
  -1 -15   6  472.70   82.11
   1  15  -5  345.80   94.42
   1  15  -5  230.04   76.25
  -1 -15   5  121.46   45.42
   1  15  -4   82.98   52.21
   1  15  -4   87.62   79.46
  -1 -15   4   50.12   37.43
   1  15  -3   87.33   63.17
  -1 -15   3   -8.67   93.34
   2 -15   2  523.18  131.08
  -2  15  -2  520.18  113.62
   2 -15   3  219.26   66.80
   2 -15   3  253.22  132.91
  -2  15  -3  355.85   70.65
   2 -15   4   37.40   40.18
  -2  15  -4   71.52   62.91
  -2  15  -4   78.52   63.25
   2 -15   5   46.40   57.81
  -2  15  -5  106.05   53.31
  -2  15  -5  154.67   66.63
   2 -15   6    8.00   38.08
  -2  15  -6    2.05   54.83
  -2  15  -6  -41.71   51.43
   2 -15   7  -60.24   38.88
  -2  15  -7   11.03   43.89
  -2  15  -7   12.88   45.78
  -2  15  -8  851.22  117.41
   2 -14  -1  -39.18  103.86
   2 -14  -1   45.31   33.19
  -2  14   1  -84.36   62.37
   2 -14   0   11.66   43.39
   2 -14   0  -83.37   98.70
  -2  14   0 -124.20   71.18
   2 -14   1  353.57   87.85
   2 -14   1  160.98   43.10
  -2  14  -1  286.48   83.07
   2 -14   2  -29.67   31.54
   2 -14   2   19.09   58.39
  -2  14  -2   58.50   41.51
   2 -14   3  490.90   56.31
  -2  14  -3  588.44   81.60
  -2  14  -3  487.35   92.26
   2 -14   4   84.68   42.20
  -2  14  -4  135.82   48.40
  -2  14  -4  136.33   65.04
   2 -14   5    6.63   44.68
  -2  14  -5   43.30   41.33
  -2  14  -5   13.66   47.81
   2 -14   6   10.43   34.56
  -2  14  -6   -6.97   42.75
  -2  14  -6   17.49   36.12
   2 -14   7  -27.39   35.43
  -2  14  -7   48.24   39.24
  -2  14  -7    9.78   37.77
   2 -14   8  249.03   68.20
  -2  14  -8  290.45   54.07
  -2  14  -8  196.68   52.31
   2 -14   9 1186.97  108.93
  -2  14  -9 1342.19  101.62
   2 -14  10   18.51   43.59
  -2  14 -10   30.61   39.49
   2 -14  11  117.71   56.13
   2 -13  -3  186.51   81.87
   2 -13  -3    0.20   48.02
  -2  13   3  216.96   80.14
   2 -13  -2  160.02   45.77
   2 -13  -2  210.40  108.27
  -2  13   2  -38.30   72.01
   2 -13  -1   22.03   94.24
   2 -13  -1   75.52   41.60
  -2  13   1   35.52   64.02
   2 -13   0  205.31   77.58
   2 -13   0   64.86   47.58
  -2  13   0  237.17   68.80
   2 -13   1   79.09   57.48
   2 -13   1   25.01   31.69
  -2  13  -1   -9.17   53.51
   2 -13   2 1504.30  181.27
   2 -13   2 1540.92   96.90
  -2  13  -2 1828.30  141.80
   2 -13   3  159.82   41.26
  -2  13  -3  114.84   47.46
  -2  13  -3  173.81   43.87
   2 -13   4    1.98   31.90
  -2  13  -4   29.49   42.54
  -2  13  -4   38.11   36.42
   2 -13   5   41.48   31.03
  -2  13  -5   59.49   43.03
  -2  13  -5   22.44   36.33
   2 -13   6  143.45   89.12
   2 -13   6  163.60   43.08
  -2  13  -6  258.71   49.07
  -2  13  -6  101.48   42.65
   2 -13   7  417.70   60.68
   2 -13   7  597.57  107.41
  -2  13  -7  480.17   61.73
  -2  13  -7  755.53   63.25
   2 -13   8  218.51   54.65
  -2  13  -8  400.32   54.00
  -2  13  -8  341.49   50.60
   2 -13   9 1160.98  100.20
  -2  13  -9 1238.50   78.25
  -2  13  -9 1153.57   87.02
   2 -13  10    0.39   39.16
  -2  13 -10  -20.29   44.50
   2 -13  11   14.29   60.37
  -2  13 -11    9.95   36.04
   2 -13  12  408.80   75.39
  -2  13 -12  316.94   58.98
   2 -12  -5   51.46   38.77
   2 -12  -5  392.35  113.40
   2 -12  -4  -55.07   79.07
   2 -12  -4  101.22   39.91
  -2  12   4   43.70   70.85
   2 -12  -3  280.14   92.62
   2 -12  -3  238.17   41.80
  -2  12   3  399.93   63.77
   2 -12  -2  120.67   65.43
   2 -12  -2   43.73   38.91
  -2  12   2   50.35   46.90
   2 -12  -1   30.13   26.36
   2 -12  -1  -44.14   56.54
  -2  12   1   78.46   52.70
   2 -12   0  271.88   93.76
   2 -12   0  274.34   47.55
  -2  12   0  171.17   71.16
   2 -12   1  212.53   65.56
   2 -12   1  261.31   38.05
  -2  12  -1  156.26   65.62
   2 -12   2 1351.66   80.32
  -2  12  -2 1513.91  120.66
  -2  12  -2 1496.34   97.22
   2 -12   3  953.62   65.31
  -2  12  -3 1094.02   96.05
  -2  12  -3 1141.93   74.02
   2 -12   4  157.67   69.47
   2 -12   4   78.32   39.58
  -2  12  -4   53.73   36.23
  -2  12  -4   54.70   44.73
   2 -12   5  -59.21   59.09
   2 -12   5   -3.66   37.87
  -2  12  -5   -5.75   29.76
  -2  12  -5   19.07   35.27
   2 -12   6   51.80   54.83
   2 -12   6    4.51   32.25
  -2  12  -6   38.00   35.66
  -2  12  -6   36.20   31.43
   2 -12   7 2845.56  152.09
   2 -12   7 3395.55  239.09
  -2  12  -7 3086.29  154.13
  -2  12  -7 3243.82  159.76
   2 -12   8  -11.18   40.46
   2 -12   8    7.05   52.55
  -2  12  -8   91.78   29.84
  -2  12  -8   63.60   30.84
   2 -12   9  398.29   67.82
  -2  12  -9  693.11   49.39
  -2  12  -9  722.39   56.16
   2 -12  10  231.71   55.87
  -2  12 -10  264.02   30.80
  -2  12 -10  240.91   58.23
   2 -12  11  111.57   53.47
  -2  12 -11  159.09   54.78
   2 -12  12  138.85   58.35
  -2  12 -12  126.84   45.12
   2 -12  13 1838.65  204.56
  -2  12 -13 1977.41  157.13
   2 -11  -6  126.76   45.13
   2 -11  -6  126.61  115.60
  -2  11   6  153.82   59.62
   2 -11  -5   10.57   65.94
   2 -11  -5   31.96   27.18
  -2  11   5   -2.85   45.91
   2 -11  -4  532.33   49.13
   2 -11  -4  594.19  104.00
  -2  11   4  569.90   73.67
   2 -11  -3   11.52   71.56
   2 -11  -3  -18.09   23.98
  -2  11   3   95.95   38.23
   2 -11  -2  350.05   38.30
   2 -11  -2  291.36   76.33
  -2  11   2  255.88   72.83
   2 -11  -1   79.69   66.16
   2 -11  -1   21.09   31.47
  -2  11   1   18.33   36.56
   2 -11   0 1704.39  170.97
   2 -11   0 1665.77   81.23
  -2  11   0 1882.27  113.74
   2 -11   1  822.94   56.65
   2 -11   1  768.47  115.33
  -2  11  -1  787.02   85.63
   2 -11   2   15.68   57.82
   2 -11   2   -0.12   23.06
  -2  11  -2   14.29   36.39
  -2  11  -2   -9.85   38.00
   2 -11   3  619.79   53.20
   2 -11   3  446.59  104.66
  -2  11  -3  698.85   54.54
  -2  11  -3  769.97   70.23
   2 -11   4  209.06   69.70
   2 -11   4  225.04   40.70
  -2  11  -4  331.43   48.36
  -2  11  -4  283.92   47.70
   2 -11   5    8.87   28.11
   2 -11   5   53.30   48.23
  -2  11  -5   38.12   30.59
  -2  11  -5   -5.43   25.01
   2 -11   6 3413.75  161.05
   2 -11   6 3338.69  201.47
  -2  11  -6 3528.33  179.76
  -2  11  -6 3322.79  155.21
   2 -11   7  406.51   63.32
   2 -11   7  307.01   48.51
  -2  11  -7  278.49   37.17
  -2  11  -7  296.74   40.57
   2 -11   8 1567.66  102.58
   2 -11   8 1679.61  129.47
  -2  11  -8 1390.49   78.95
  -2  11  -8 1717.61   85.81
   2 -11   9   25.71   30.35
   2 -11   9   31.44   34.49
  -2  11  -9   42.58   28.19
  -2  11  -9   27.34   23.22
   2 -11  10   25.46   39.49
  -2  11 -10    1.89   16.57
  -2  11 -10   42.44   29.53
   2 -11  11  290.90   57.53
  -2  11 -11  202.66   39.91
   2 -11  12   38.07   46.21
  -2  11 -12    1.77   35.83
   2 -11  13  464.43  115.26
  -2  11 -13  620.45   69.09
   2 -11  14  342.10  109.61
  -2  11 -14  427.50   65.07
   2 -10  -7   55.09   69.03
   2 -10  -7  100.10   37.61
  -2  10   7   17.19   49.74
   2 -10  -6  136.36   38.69
   2 -10  -6  339.78  102.37
  -2  10   6  202.05   57.34
   2 -10  -5  779.06   65.10
   2 -10  -5  890.65  144.99
  -2  10   5  681.88   78.37
   2 -10  -4  624.11  124.19
   2 -10  -4  627.67   52.06
  -2  10   4  432.97   71.14
   2 -10  -3  -12.31   61.24
   2 -10  -3   -9.24   21.06
  -2  10   3  -25.42   37.09
   2 -10  -2   84.06   58.65
   2 -10  -2   28.88   21.81
  -2  10   2    9.56   47.15
   2 -10  -1  331.32   31.29
   2 -10  -1  289.60   66.20
  -2  10   1  324.41   46.10
   2 -10   0  -19.37   55.31
   2 -10   0   -9.08   20.14
   2 -10   0   19.20   39.33
  -2  10   0   28.25   35.36
   2 -10   1 7789.79  344.40
   2 -10   1 7975.69  441.08
  -2  10  -1 7435.82  381.71
  -2  10  -1 7489.73  360.41
   2 -10   2   57.09   23.38
   2 -10   2   31.86   51.66
  -2  10  -2  -10.58   24.87
  -2  10  -2   -7.16   35.90
   2 -10   3 2538.71  115.39
   2 -10   3 2568.69  102.31
   2 -10   3 2347.23  166.89
  -2  10  -3 2681.09  135.58
  -2  10  -3 2598.67  136.79
  -2  10  -3 2429.11  110.23
   2 -10   4  223.11   34.36
   2 -10   4  189.09   56.35
  -2  10  -4  121.93   36.29
  -2  10  -4  236.74   31.51
   2 -10   5  400.53   43.86
   2 -10   5  319.74   60.77
  -2  10  -5  399.56   37.77
  -2  10  -5  383.59   43.54
   2 -10   6 2638.92  126.25
   2 -10   6 2693.80  140.00
  -2  10  -6 2644.53  132.64
  -2  10  -6 2646.98  115.98
   2 -10   7 4967.77  232.43
   2 -10   7 4983.38  239.62
  -2  10  -7 4848.98  192.08
  -2  10  -7 4760.68  207.02
   2 -10   8 2365.76  150.84
   2 -10   8 2083.45  104.52
  -2  10  -8 2033.21   99.35
  -2  10  -8 2022.24   88.02
   2 -10   9 1725.45  106.90
   2 -10   9 1672.96   69.54
  -2  10  -9 1543.82   81.83
  -2  10  -9 1470.12   62.00
   2 -10  10  535.78   66.68
  -2  10 -10  474.61   62.78
  -2  10 -10  508.34   28.81
   2 -10  11 1750.13  125.57
  -2  10 -11 1480.03   91.11
   2 -10  12 1778.85  135.20
  -2  10 -12 1542.54   95.23
   2 -10  13   49.34   67.63
  -2  10 -13   45.96   37.23
   2 -10  14  407.44  134.20
  -2  10 -14  740.85   99.07
   2  -9  -8  125.54   68.25
   2  -9  -8   -7.48   32.82
  -2   9   8   52.70   44.84
   2  -9  -7   44.96   54.66
   2  -9  -7  -13.86   25.87
  -2   9   7    5.40   38.34
   2  -9  -6 2005.13  179.80
   2  -9  -6 2282.94  110.79
  -2   9   6 2059.31  137.52
   2  -9  -5   60.05   55.90
   2  -9  -5   59.80   20.82
  -2   9   5  -31.30   35.14
   2  -9  -4   39.32   47.13
   2  -9  -4   21.15   18.98
  -2   9   4   18.64   35.96
   2  -9  -3   23.63   40.26
   2  -9  -3   -4.76   22.20
  -2   9   3  -13.17   27.54
   2  -9  -2   16.82   23.14
   2  -9  -2   30.41   39.20
  -2   9   2  -11.74   29.20
  -2   9   2    1.69   36.39
   2  -9  -1 1704.16  115.87
   2  -9  -1 1683.48   76.98
   2  -9  -1 1788.09   87.08
   2  -9  -1 1884.87  120.93
  -2   9   1 1769.94  114.28
  -2   9   1 1713.56  108.39
   2  -9   0 3769.23  232.75
   2  -9   0 4072.84  205.70
   2  -9   0 3875.24  151.06
   2  -9   0 3754.77  145.78
  -2   9   0 3861.09  201.86
  -2   9   0 3846.82  177.66
   2  -9   1 2508.07   98.47
   2  -9   1 2656.18  175.34
   2  -9   1 2472.44  103.44
  -2   9  -1 2739.76  138.53
  -2   9  -1 2532.30  134.46
  -2   9  -1 2591.37  126.05
   2  -9   2  -14.15   41.80
   2  -9   2    2.70   26.88
   2  -9   2    1.46   17.87
  -2   9  -2   33.29   34.23
  -2   9  -2   12.70   21.10
  -2   9  -2   16.78   23.73
   2  -9   3   38.98   39.51
   2  -9   3   69.78   25.34
   2  -9   3    3.94   25.32
  -2   9  -3   56.25   22.71
  -2   9  -3   35.46   28.52
  -2   9  -3   49.66   32.85
   2  -9   4   50.28   38.17
   2  -9   4   52.06   21.89
   2  -9   4   84.93   27.97
  -2   9  -4   78.07   28.05
  -2   9  -4  107.72   31.22
  -2   9  -4   67.85   34.70
   2  -9   5 3725.55  172.20
   2  -9   5 3968.35  151.36
   2  -9   5 3842.62  169.14
  -2   9  -5 3663.01  167.37
  -2   9  -5 3727.42  191.46
  -2   9  -5 3485.34  143.26
   2  -9   6 1463.12   84.47
   2  -9   6 1480.30   66.75
   2  -9   6 1635.68   94.67
  -2   9  -6 1535.97   71.32
  -2   9  -6 1519.91   97.75
  -2   9  -6 1498.65   66.30
   2  -9   7 3311.58  179.14
   2  -9   7 3330.86  137.77
   2  -9   7 3221.33  144.79
  -2   9  -7 3126.86  123.17
  -2   9  -7 3315.06  214.25
  -2   9  -7 3148.10  150.10
   2  -9   8    8.87   33.54
   2  -9   8   68.23   21.84
  -2   9  -8   93.68   24.89
  -2   9  -8   47.33   19.31
   2  -9   9  -26.51   32.11
  -2   9  -9   16.10   15.46
  -2   9  -9    1.54   22.31
  -2   9  -9    3.56   12.70
   2  -9  10   42.11   49.63
  -2   9 -10    7.14   10.35
  -2   9 -10   28.18   12.05
  -2   9 -10   36.67   34.86
   2  -9  11   39.31   42.42
  -2   9 -11   13.99   26.58
   2  -9  12 2854.34  182.94
  -2   9 -12 2729.18  166.33
   2  -9  13  261.76   64.06
  -2   9 -13  171.22   45.72
   2  -9  14   28.01   74.18
  -2   9 -14   61.60   41.36
   2  -9  15   44.68   71.72
  -2   9 -15  128.28   63.91
   2  -8 -10  154.48   75.22
   2  -8  -9    3.43   25.98
   2  -8  -9    7.12   80.33
  -2   8   9   10.47   53.02
   2  -8  -8  -94.01   70.89
   2  -8  -8   22.07   25.78
  -2   8   8   -1.06   37.27
   2  -8  -7  304.77  104.32
   2  -8  -7  324.39   38.45
  -2   8   7  469.65   61.13
   2  -8  -6  246.56   27.40
   2  -8  -6  275.77   88.56
  -2   8   6  298.71   48.23
   2  -8  -5 1548.00   72.42
   2  -8  -5 1665.82  127.25
  -2   8   5 1486.79   96.64
   2  -8  -4  110.70   46.40
   2  -8  -4   72.54   25.79
  -2   8   4  103.80   35.10
  -2   8   4  122.69   37.99
   2  -8  -3  131.96   54.11
   2  -8  -3  223.60   22.87
   2  -8  -3  176.68   31.26
   2  -8  -3  122.42   55.11
  -2   8   3  256.05   40.49
  -2   8   3  245.10   51.24
   2  -8  -2  176.21   58.14
   2  -8  -2  156.84   21.48
   2  -8  -2   96.07   32.50
   2  -8  -2  107.79   61.04
  -2   8   2  116.68   32.98
  -2   8   2   71.71   42.60
   2  -8  -1 2148.30   96.48
   2  -8  -1 2262.65  125.96
   2  -8  -1 2073.90   76.65
   2  -8  -1 2151.17  124.09
  -2   8   1 2157.66  125.42
  -2   8   1 2139.61   92.25
   2  -8   0 4876.93  188.64
   2  -8   0 4865.62  235.40
   2  -8   0 4770.70  177.46
  -2   8   0 4954.85  207.97
  -2   8   0 4829.19  206.65
   2  -8   1 2427.27   95.39
   2  -8   1 2373.51  113.81
   2  -8   1 2460.88   86.27
  -2   8  -1 2490.93  103.74
  -2   8  -1 2427.40  111.66
  -2   8  -1 2588.07  109.52
   2  -8   2  168.42   20.33
   2  -8   2  198.66   24.86
   2  -8   2  132.81   42.77
  -2   8  -2  195.40   26.97
  -2   8  -2  221.76   33.56
  -2   8  -2  229.78   31.63
   2  -8   3 3364.61  154.35
   2  -8   3 3506.73  165.45
   2  -8   3 3496.28  120.03
  -2   8  -3 3371.88  125.97
  -2   8  -3 3596.59  174.72
  -2   8  -3 3396.31  139.88
   2  -8   4 1121.36   59.79
   2  -8   4 1158.73   63.70
   2  -8   4 1231.69   48.60
   2  -8   4 1150.57   69.85
  -2   8  -4 1102.79   54.20
  -2   8  -4 1197.01   69.66
  -2   8  -4 1092.93   56.23
   2  -8   516562.90  915.49
   2  -8   516419.23  909.75
   2  -8   517006.17  894.88
  -2   8  -516460.97  950.56
  -2   8  -516742.58  874.34
  -2   8  -516534.98  861.08
   2  -8   6 2780.15  119.56
   2  -8   6 2538.06  135.77
   2  -8   6 2625.03  111.81
  -2   8  -6 2607.25  134.82
  -2   8  -6 2604.61  106.20
  -2   8  -6 2718.48  102.79
   2  -8   7  199.60   40.06
   2  -8   7  272.58   25.85
   2  -8   7  257.60   28.87
   2  -8   7  260.33   32.76
  -2   8  -7  238.51   28.57
  -2   8  -7  268.93   30.42
   2  -8   8   98.09   39.64
   2  -8   8  170.49   30.54
   2  -8   8  163.28   28.76
  -2   8  -8  172.85   27.41
  -2   8  -8  160.96   20.57
   2  -8   9 1448.64   92.13
  -2   8  -9 1360.41   80.85
  -2   8  -9 1346.72   36.73
  -2   8  -9 1350.23   47.83
   2  -8  10  169.69   61.75
  -2   8 -10  208.57   31.63
  -2   8 -10  223.14   12.18
  -2   8 -10  118.28   14.49
   2  -8  11 3243.48  189.11
  -2   8 -11 3240.14  151.27
   2  -8  12  424.76   77.86
  -2   8 -12  452.13   49.88
   2  -8  13  208.30   59.98
  -2   8 -13  129.73   51.74
   2  -8  14    8.72   73.03
  -2   8 -14   36.86   37.74
   2  -8  15   28.76   62.07
  -2   8 -15   36.18   56.07
   2  -7 -10   70.42   32.17
   2  -7 -10  -42.99   88.06
  -2   7  10  164.52   63.91
   2  -7  -9  136.00   62.13
   2  -7  -9   46.11   26.77
  -2   7   9  117.76   44.28
   2  -7  -8  217.57   32.46
   2  -7  -8  199.98   89.94
  -2   7   8  209.71   51.33
   2  -7  -7 1917.53   82.01
   2  -7  -7 1678.46  143.06
  -2   7   7 1581.62  104.83
   2  -7  -6  347.58   25.64
   2  -7  -6  375.24   63.72
  -2   7   6  274.70   40.80
  -2   7   6  201.34   59.50
   2  -7  -5  353.30   30.00
   2  -7  -5  353.30   59.81
   2  -7  -5  291.81   38.74
  -2   7   5  412.59   42.71
  -2   7   5  393.25   44.83
   2  -7  -4  318.85   64.03
   2  -7  -4  273.15   32.50
   2  -7  -4  319.91   22.12
   2  -7  -4  204.79   69.87
  -2   7   4  362.57   30.08
  -2   7   4  246.65   41.21
   2  -7  -3   11.54   14.27
   2  -7  -3   32.45   30.39
   2  -7  -3   -1.90   32.85
   2  -7  -3   19.96   19.08
  -2   7   3  -24.45   26.72
  -2   7   3    8.36   22.20
   2  -7  -2 3807.18  141.36
   2  -7  -2 3639.25  219.18
   2  -7  -2 3899.67  155.64
   2  -7  -2 3603.39  177.21
  -2   7   2 3757.54  176.34
  -2   7   2 3712.83  141.41
   2  -7  -1 1704.17  103.25
   2  -7  -1 1572.65   59.53
   2  -7  -1 1609.50   90.11
   2  -7  -1 1577.64   59.75
  -2   7   1 1610.99   81.54
  -2   7   1 1580.02   77.15
   2  -7   0 4556.99  184.03
   2  -7   0 4887.91  208.80
   2  -7   0 4611.50  175.83
  -2   7   0 4637.06  185.27
  -2   7   0 4799.20  182.89
  -2   7   0 4443.10  177.11
   2  -7   1    4.82   32.05
   2  -7   1    9.98   14.26
   2  -7   1    8.37   21.87
  -2   7  -1   43.82   17.42
  -2   7  -1   14.39   24.81
  -2   7  -1   16.08   20.32
   2  -7   2   13.00   13.95
   2  -7   2   44.31   27.22
   2  -7   2   43.22   18.42
  -2   7  -2   27.51   17.73
  -2   7  -2   19.90   21.47
  -2   7  -2    0.81   20.54
   2  -7   3   98.09   23.02
   2  -7   3   95.22   27.87
   2  -7   3   67.88   16.28
  -2   7  -3   97.62   26.77
  -2   7  -3   92.89   18.76
  -2   7  -3  102.95   22.50
   2  -7   4  590.39   41.66
   2  -7   4  564.38   43.29
   2  -7   4  601.42   29.62
  -2   7  -4  624.82   46.36
  -2   7  -4  553.26   32.10
  -2   7  -4  543.77   32.55
   2  -7   5 4564.88  177.91
   2  -7   5 4460.49  185.27
   2  -7   5 4594.02  160.91
  -2   7  -5 4789.75  227.69
  -2   7  -5 4575.39  168.67
  -2   7  -5 4360.88  154.86
   2  -7   6 8100.15  377.93
   2  -7   6 8703.26  349.12
   2  -7   6 7789.88  311.31
   2  -7   6 8163.39  320.32
  -2   7  -6 8213.32  318.88
  -2   7  -6 8090.09  334.96
   2  -7   7    7.65   17.78
   2  -7   7    2.71   12.41
   2  -7   7    5.54   26.80
   2  -7   7    9.30   12.81
  -2   7  -7   13.68   13.64
  -2   7  -7    4.48   18.45
   2  -7   8 1214.43   93.31
   2  -7   8 1208.51   44.97
   2  -7   8 1134.42   60.86
  -2   7  -8 1152.26   30.49
  -2   7  -8 1190.52   39.54
  -2   7  -8 1110.71   54.81
   2  -7   9 2518.08  163.73
   2  -7   9 2643.94  101.11
   2  -7   9 2580.63  137.89
  -2   7  -9 2474.17   61.45
  -2   7  -9 2547.63  104.03
  -2   7  -9 2612.30   75.56
   2  -7  10 1549.08  109.25
  -2   7 -10 1672.28   91.20
  -2   7 -10 1493.00   42.63
   2  -7  11 5012.14  277.02
  -2   7 -11 4685.47  212.02
   2  -7  12 1264.52  104.58
  -2   7 -12 1121.20   73.71
   2  -7  13  131.51   59.18
  -2   7 -13  103.84   49.67
   2  -7  14  388.65   81.68
  -2   7 -14  384.08   71.58
   2  -7  15  272.07   81.88
  -2   7 -15  224.71   55.41
   2  -6 -11   67.58   31.31
   2  -6 -11  257.52   90.67
  -2   6  11   47.55   49.36
   2  -6 -10   36.12   25.92
   2  -6 -10   68.75   76.56
  -2   6  10   93.45   41.28
   2  -6  -9   59.98   67.46
   2  -6  -9   38.69   22.70
  -2   6   9   39.78   49.54
   2  -6  -8  179.08   25.52
   2  -6  -8  185.76   60.04
  -2   6   8  187.29   41.68
  -2   6   8  129.16   40.98
   2  -6  -7 2133.28   84.16
   2  -6  -7 2190.27  176.25
  -2   6   7 2004.22  111.46
  -2   6   7 2023.73  100.35
   2  -6  -6   30.47   39.63
   2  -6  -6   20.89   18.96
  -2   6   6   13.17   38.45
  -2   6   6   35.37   23.19
  -2   6   6   15.64   28.90
   2  -6  -5 1140.30   47.07
   2  -6  -5 1239.85   90.67
   2  -6  -5 1080.04   70.67
   2  -6  -5 1196.23   79.28
  -2   6   5 1117.91   48.44
  -2   6   5 1076.71   67.35
   2  -6  -4   -0.43   11.38
   2  -6  -4   14.35   26.66
   2  -6  -4   16.97   31.82
   2  -6  -4  -17.81   17.74
  -2   6   4  -14.24   18.74
  -2   6   4   -2.94   29.27
   2  -6  -3    2.82   24.62
   2  -6  -3    7.72   11.86
   2  -6  -3   23.12   30.25
   2  -6  -3  -12.72   15.73
  -2   6   3    7.67   21.55
  -2   6   3  -11.01   19.09
   2  -6  -2 2322.43   85.75
   2  -6  -2 2330.17  117.72
   2  -6  -2 2337.25   82.63
   2  -6  -2 2400.60  108.98
  -2   6   2 2417.10  102.66
  -2   6   2 2637.31   89.66
   2  -6  -124165.58 1502.55
   2  -6  -123904.85 1516.82
  -2   6   123387.36 1408.02
  -2   6   123867.39 1446.20
   2  -6   0    5.91   13.89
   2  -6   0   -6.78   25.83
   2  -6   0   -1.81   12.28
  -2   6   0   15.74   21.70
  -2   6   0   13.26   15.79
  -2   6   0    2.80   23.35
   2  -6   1 2475.18   75.30
   2  -6   1 2441.42   94.73
   2  -6   1 2547.17  113.44
  -2   6  -1 2398.36   83.84
  -2   6  -1 2613.59   99.45
  -2   6  -1 2387.20   90.05
   2  -6   2  234.18   28.89
   2  -6   2  236.80   23.67
   2  -6   2  118.01   17.03
  -2   6  -2  250.35   26.41
  -2   6  -2  154.68   19.64
  -2   6  -2  203.51   24.38
   2  -6   3 2384.03   92.36
   2  -6   3 2367.11   89.29
   2  -6   3 2557.55   77.41
  -2   6  -3 2276.40   76.62
  -2   6  -3 2313.64   91.97
  -2   6  -3 2264.18   78.81
   2  -6   4 9680.11  452.43
   2  -6   4 9631.99  406.27
   2  -6   4 9673.56  383.07
  -2   6  -4 9596.63  441.82
  -2   6  -4 9668.37  393.72
  -2   6  -4 9974.05  399.78
   2  -6   5 3684.07  121.46
   2  -6   5 3628.01  128.52
   2  -6   5 3478.80  146.03
  -2   6  -5 3489.65  113.57
  -2   6  -5 3479.75  121.92
  -2   6  -5 3534.03  151.53
   2  -6   6 3196.86   95.14
   2  -6   6 2932.62  135.00
   2  -6   6 3155.04   99.73
   2  -6   6 3163.10  110.91
  -2   6  -6 3047.39   91.04
  -2   6  -6 3412.79  129.51
   2  -6   7 1143.56   70.31
   2  -6   7 1156.49   51.37
   2  -6   7 1125.25   38.23
  -2   6  -7 1148.64   27.75
  -2   6  -7 1120.48   47.55
  -2   6  -7 1214.72   37.54
   2  -6   8   44.53   32.57
   2  -6   8   54.06   23.72
   2  -6   8   72.27   13.72
  -2   6  -8   72.47   21.29
  -2   6  -8   61.85    6.98
  -2   6  -8   39.56   11.66
   2  -6   9 2927.54  176.83
   2  -6   9 2894.72  104.65
   2  -6   9 3041.08  129.60
  -2   6  -9 2917.47   71.79
  -2   6  -9 2962.30  131.46
  -2   6  -9 2895.64   84.94
   2  -6  10 1861.86  136.28
   2  -6  10 1902.23   76.29
   2  -6  10 1783.82  120.85
  -2   6 -10 1669.71   45.10
  -2   6 -10 1774.94   60.97
  -2   6 -10 1677.27   95.85
   2  -6  11 1310.47  129.80
  -2   6 -11 1275.36   90.36
  -2   6 -11 1285.51   52.76
  -2   6 -11 1248.22   42.65
   2  -6  12  293.93   91.08
  -2   6 -12  408.40   59.13
  -2   6 -12  428.68   35.18
   2  -6  13   20.65   46.20
  -2   6 -13   -7.54   24.25
  -2   6 -13    8.74   27.91
   2  -6  14   28.46   70.48
  -2   6 -14  -33.39   35.34
   2  -6  15   44.74   84.30
  -2   6 -15   38.26   44.51
   2  -5 -12  174.93   36.40
   2  -5 -12  105.38   92.01
  -2   5  12   82.14   69.71
   2  -5 -11   24.11   22.01
   2  -5 -11 -185.12   63.73
  -2   5  11  -15.72   49.34
   2  -5 -10  116.20   27.25
   2  -5 -10  148.69   58.37
  -2   5  10  132.06   45.60
   2  -5  -9   94.15   22.85
   2  -5  -9  100.75   53.18
  -2   5   9   99.74   38.61
  -2   5   9   77.05   33.63
   2  -5  -8 1734.18  131.61
   2  -5  -8 2035.48   79.70
  -2   5   8 1729.01  104.27
  -2   5   8 2059.50   89.56
   2  -5  -7  -15.74   37.63
   2  -5  -7   18.42   17.12
  -2   5   7    0.13   28.61
  -2   5   7   16.49   20.08
  -2   5   7    4.60   38.07
   2  -5  -6   78.81   34.90
   2  -5  -6   66.87   33.85
   2  -5  -6   32.23   16.26
  -2   5   6   25.43   19.61
  -2   5   6   11.26   36.46
  -2   5   6   19.30   35.12
   2  -5  -5   43.02   27.01
   2  -5  -5   47.99   46.82
   2  -5  -5   30.82   15.46
  -2   5   5   49.55   17.45
  -2   5   5   42.31   31.69
  -2   5   5   52.98   25.06
   2  -5  -4  333.43   51.03
   2  -5  -4  588.66   39.81
   2  -5  -4  441.52   24.83
  -2   5   4  400.94   38.15
  -2   5   4  413.20   30.12
   2  -5  -3 4171.26  149.23
   2  -5  -3 4442.77  144.67
   2  -5  -3 4237.56  174.08
   2  -5  -3 4185.63  192.25
  -2   5   3 4005.61  157.56
  -2   5   3 4382.31  150.55
   2  -5  -2  503.39   23.77
   2  -5  -2  490.89   46.90
   2  -5  -2  535.85   28.84
   2  -5  -2  470.15   35.25
  -2   5   2  609.81   36.32
  -2   5   2  492.15   32.89
   2  -5  -1 8218.33  351.96
   2  -5  -1 7796.12  367.97
   2  -5  -1 7974.77  291.55
   2  -5  -1 7750.01  286.31
  -2   5   1 7546.36  301.33
  -2   5   1 7722.73  296.01
   2  -5   0  517.95   38.27
   2  -5   0  474.81   22.77
   2  -5   0  559.61   27.32
  -2   5   0  519.25   28.42
  -2   5   0  552.46   36.73
  -2   5   0  550.35   29.13
   2  -5   1   78.95   13.36
   2  -5   1   64.38   22.93
   2  -5   1   99.62   16.61
  -2   5  -1   78.35   17.67
  -2   5  -1   79.40   15.29
  -2   5  -1   59.98   18.95
   2  -5   2   42.56   18.38
   2  -5   2   40.38   17.73
   2  -5   2   55.18   12.33
  -2   5  -2   54.46   15.08
  -2   5  -2   40.50   14.07
  -2   5  -2   38.55   19.79
   2  -5   3 5851.58  192.76
   2  -5   3 5899.60  217.87
   2  -5   3 6024.79  234.25
  -2   5  -3 6036.47  206.50
  -2   5  -3 5789.34  197.26
  -2   5  -3 6012.97  231.31
   2  -5   420427.28 1059.20
  -2   5  -419664.39 1117.24
   2  -5   514529.43  682.65
   2  -5   514135.46  624.91
   2  -5   514526.17  727.49
  -2   5  -513830.82  641.99
   2  -5   6 1663.64   84.44
   2  -5   6 1658.94   50.19
   2  -5   6 1388.07   57.22
  -2   5  -6 1746.17   36.14
  -2   5  -6 1723.50   68.58
  -2   5  -6 1856.94   47.31
   2  -5   7   -2.98   10.16
   2  -5   7   17.26   16.43
   2  -5   7   41.24   25.37
  -2   5  -7    1.88    4.93
  -2   5  -7    1.39   15.60
  -2   5  -7    6.33    8.31
   2  -5   8  718.91   35.24
   2  -5   8  654.43   57.57
   2  -5   8  823.17   46.55
  -2   5  -8  768.69   29.13
  -2   5  -8  779.45   42.00
  -2   5  -8  748.53   20.80
   2  -5   9   84.38   15.66
   2  -5   9  131.82   36.87
   2  -5   9   91.68   39.33
  -2   5  -9   77.29   12.84
  -2   5  -9   77.43   19.45
  -2   5  -9  132.02   31.34
   2  -5  1012021.05  546.73
   2  -5  1011978.10  627.47
   2  -5  1012172.71  677.93
  -2   5 -1012698.19  557.51
  -2   5 -1011218.53  470.78
  -2   5 -1011724.14  575.55
   2  -5  11  185.92   56.17
  -2   5 -11  234.72   33.50
  -2   5 -11  210.28   29.42
  -2   5 -11  233.94   21.54
   2  -5  12  130.44   68.03
  -2   5 -12  249.29   44.04
  -2   5 -12  177.91   32.14
  -2   5 -12   45.29   29.62
   2  -5  13    4.58   44.61
  -2   5 -13    0.35   28.55
  -2   5 -13  -11.03   29.37
   2  -5  14  754.98   96.53
  -2   5 -14  264.70   76.03
   2  -5  15   87.08   85.79
  -2   5 -15   10.00   42.02
   2  -4 -13  439.68  102.92
   2  -4 -13  141.19   38.97
  -2   4  13  234.77   65.31
   2  -4 -12  205.61   37.13
   2  -4 -12  356.78   73.28
  -2   4  12  371.26   73.39
   2  -4 -11  507.87   36.68
   2  -4 -11  316.40   81.33
  -2   4  11  431.27   75.72
   2  -4 -10  703.97   38.98
   2  -4 -10  708.83   83.88
  -2   4  10  652.09   54.59
  -2   4  10  474.62   80.47
   2  -4  -9  211.30   24.65
   2  -4  -9  100.10   54.96
  -2   4   9  164.26   30.20
  -2   4   9  132.93   51.36
   2  -4  -8 2797.24  172.73
   2  -4  -8 3196.94  107.37
  -2   4   8 2989.29  188.12
  -2   4   8 3112.14  167.99
  -2   4   8 3149.54  119.29
   2  -4  -7 4438.79  233.06
   2  -4  -7 4669.43  157.43
   2  -4  -7 4385.50  202.45
  -2   4   7 4310.57  154.82
  -2   4   7 4352.93  264.64
  -2   4   7 4837.80  227.24
   2  -4  -6  744.60   68.12
   2  -4  -6  770.71   31.84
   2  -4  -6  713.32   50.31
  -2   4   6  829.36   65.97
  -2   4   6  734.41   57.12
  -2   4   6  773.66   34.43
   2  -4  -5 8385.95  411.33
   2  -4  -5 8565.19  313.25
   2  -4  -5 8518.47  375.81
  -2   4   5 8901.62  415.66
  -2   4   5 8293.17  316.49
  -2   4   5 8594.09  376.54
   2  -4  -4 4032.04  178.81
   2  -4  -4 4041.50  123.08
   2  -4  -4 3990.67  153.85
  -2   4   4 4527.06  179.71
  -2   4   4 4157.13  153.33
  -2   4   4 3860.40  125.54
   2  -4  -310825.87  542.64
   2  -4  -311502.71  461.12
   2  -4  -311381.78  512.86
  -2   4   311602.16  520.46
  -2   4   311391.76  528.24
  -2   4   311348.97  470.01
   2  -4  -216874.22  825.40
   2  -4  -216197.44  878.93
   2  -4  -217050.34  860.10
  -2   4   216651.14  837.30
   2  -4  -1 1029.27   55.44
   2  -4  -1  976.90   33.78
   2  -4  -1 1053.47   50.64
   2  -4  -1 1005.86   33.45
  -2   4   1 1024.45   41.98
  -2   4   1 1013.43   41.74
   2  -4   0  137.47   14.16
   2  -4   0  146.83   16.17
   2  -4   0  210.02   21.22
  -2   4   0  131.96   17.12
  -2   4   0  186.45   16.97
  -2   4   0  132.78   21.44
   2  -4   1 5872.11  206.35
   2  -4   1 5700.63  183.96
   2  -4   1 6020.46  210.46
  -2   4  -1 5937.05  201.01
  -2   4  -1 5797.68  209.10
  -2   4  -1 6055.99  198.42
   2  -4   2  548.00   30.63
   2  -4   2  636.92   33.90
   2  -4   2  604.26   21.66
  -2   4  -2  564.57   22.48
  -2   4  -2  592.99   23.66
  -2   4  -2  596.45   32.81
   2  -4   4  576.02   20.67
   2  -4   4  559.52   24.15
   2  -4   4  556.41   38.63
   2  -4   4  605.69   20.41
  -2   4  -4  564.23   25.31
  -2   4  -4  574.03   17.47
   2  -4   5 5088.95  181.54
   2  -4   5 4944.93  200.18
   2  -4   5 4878.79  146.97
  -2   4  -5 4930.88  162.25
   2  -4   6  246.08   32.98
   2  -4   6  220.53   20.88
   2  -4   6  202.24   12.99
  -2   4  -6  218.78   19.85
  -2   4  -6  203.49   10.97
   2  -4   7   57.00   24.90
   2  -4   7   60.20   11.18
  -2   4  -7   86.36   17.36
  -2   4  -7   87.36    9.84
  -2   4  -7   93.03   13.76
   2  -4   8 1891.00   82.54
   2  -4   8 1908.06   54.97
  -2   4  -8 1922.49   67.16
  -2   4  -8 1880.69   61.77
  -2   4  -8 1714.60   81.16
  -2   4  -8 1852.23   51.34
   2  -4   9 1181.61   39.88
   2  -4   9 1177.01   67.78
  -2   4  -9 1278.41   50.03
  -2   4  -9 1259.42   58.87
  -2   4  -9 1198.94   50.52
  -2   4  -9 1126.18   43.43
   2  -4  10 2866.22   92.59
   2  -4  10 3029.02  168.04
  -2   4 -10 2891.91  141.96
  -2   4 -10 2845.14  102.10
  -2   4 -10 2795.84  106.12
  -2   4 -10 2951.97  104.80
  -2   4 -11 1042.54   49.41
  -2   4 -11 1038.17   53.09
  -2   4 -11  917.83   59.42
  -2   4 -11  896.97   47.50
  -2   4 -12   64.30   27.55
  -2   4 -12   41.08   25.34
  -2   4 -12   22.77   39.01
  -2   4 -12  -14.88   33.47
  -2   4 -13   66.73   37.16
  -2   4 -13   57.63   31.47
  -2   4 -13   99.17   29.03
  -2   4 -14  518.76   64.74
  -2   4 -14  469.71   53.76
  -2   4 -15  738.53  110.03
   2  -3 -13    8.34   71.87
   2  -3 -13   62.28   29.50
  -2   3  13  -11.91   56.14
   2  -3 -12   56.41   52.72
   2  -3 -12   73.99   25.24
  -2   3  12   63.07   54.93
   2  -3 -11   -7.72   18.14
   2  -3 -11  -10.17   54.25
  -2   3  11    4.06   24.33
  -2   3  11   -1.45   39.51
   2  -3 -10   22.41   18.05
   2  -3 -10   29.57   43.24
  -2   3  10   14.25   29.69
  -2   3  10   27.72   20.33
   2  -3  -9 4633.68  161.02
   2  -3  -9 4987.46  301.71
  -2   3   9 4729.08  175.61
  -2   3   9 4453.45  204.50
   2  -3  -8  207.56   19.84
   2  -3  -8  223.12   46.76
   2  -3  -8  141.84   38.64
  -2   3   8  184.58   21.26
  -2   3   8  207.11   63.46
  -2   3   8  115.96   43.20
   2  -3  -7  754.06   28.54
   2  -3  -7  811.81   64.68
   2  -3  -7  630.58   48.97
  -2   3   7  780.54   63.53
  -2   3   7  812.35   33.11
  -2   3   7  725.17   48.47
   2  -3  -6  132.18   24.24
   2  -3  -6   76.96   32.75
   2  -3  -6   76.48   12.32
  -2   3   6   60.49   24.45
  -2   3   6   66.96   13.41
  -2   3   6  102.10   30.90
   2  -3  -5  399.23   17.77
   2  -3  -5  430.12   33.28
   2  -3  -5  458.79   42.50
  -2   3   5  510.37   41.72
  -2   3   5  495.27   30.43
  -2   3   5  405.76   19.66
   2  -3  -4 1637.88   44.61
   2  -3  -4 1654.23   84.52
   2  -3  -4 1665.81   65.97
  -2   3   4 1451.50   74.67
  -2   3   4 1562.72   60.50
  -2   3   4 1562.69   45.80
   2  -3  -3  136.43   12.08
   2  -3  -3  148.28   28.94
   2  -3  -3  123.94   20.09
  -2   3   3  107.20   23.71
  -2   3   3   95.33   20.63
  -2   3   3  141.30   14.63
   2  -3  -1   24.95   18.98
   2  -3  -1   20.69   10.85
   2  -3  -1    8.00   11.41
   2  -3  -1   16.02   11.69
  -2   3   1   11.92   17.69
  -2   3   1   -8.02   12.77
   2  -3   0 7622.11  259.39
   2  -3   0 8029.17  291.11
   2  -3   0 7573.50  276.17
  -2   3   0 7720.79  278.49
  -2   3   0 7407.90  259.94
  -2   3   0 7917.71  280.29
   2  -3   1  832.68   29.39
   2  -3   1  820.26   32.59
   2  -3   1  803.68   24.80
  -2   3  -1  856.34   27.31
  -2   3  -1  862.51   35.32
  -2   3  -1  890.02   27.00
   2  -3   2  385.77   15.23
   2  -3   2  360.37   20.26
   2  -3   2  389.79   27.42
  -2   3  -2  370.33   28.02
  -2   3  -2  364.36   15.19
  -2   3  -2  416.48   17.34
   2  -3   5  172.80   14.84
   2  -3   5  218.02   21.28
  -2   3  -5  185.41   10.28
  -2   3  -5  217.13   21.59
  -2   3  -5  217.24   15.48
   2  -3   6 7289.32  243.03
   2  -3   6 7476.94  282.19
  -2   3  -6 7351.63  270.18
  -2   3  -6 7079.71  226.65
  -2   3  -6 7260.92  254.61
   2  -3   7 1052.07   31.01
   2  -3   7 1069.68   31.91
   2  -3   7  961.81   46.87
  -2   3  -7 1042.10   44.32
  -2   3  -7 1079.83   50.41
  -2   3  -7  991.21   33.76
   2  -3   8 6712.17  299.11
   2  -3   8 6534.79  220.88
   2  -3   8 6595.84  222.72
  -2   3  -8 6632.57  240.69
  -2   3  -8 6809.28  284.97
  -2   3  -8 6851.52  243.39
   2  -3   9 5685.00  202.11
   2  -3   9 5679.27  197.95
   2  -3   9 5663.38  271.14
  -2   3  -9 5559.36  224.90
  -2   3  -9 5679.53  208.11
  -2   3  -9 5928.95  215.89
   2  -3  10  661.58   34.71
   2  -3  10  613.46   73.30
   2  -3  10  632.40   36.82
  -2   3 -10  708.84   42.93
  -2   3 -10  689.02   45.28
  -2   3 -10  674.68   48.25
   2  -3  11  426.60   33.67
  -2   3 -11  384.27   42.11
  -2   3 -11  434.56   42.97
  -2   3 -11  430.80   50.98
   2  -3  12 1677.55   78.50
  -2   3 -12 1493.89   86.57
  -2   3 -12 1715.74   86.79
   2  -3  13   72.94   31.42
  -2   3 -13   54.12   47.34
  -2   3 -13   94.63   36.19
  -2   3 -14 1620.80   85.67
  -2   3 -14 1455.80  110.85
  -2   3 -15   -8.09   30.09
  -2   3 -15    3.98   41.59
   2  -2 -14   27.65   75.85
   2  -2 -14   54.99   33.05
  -2   2  14  -27.18   59.95
   2  -2 -13  385.00   37.17
   2  -2 -13  210.12   71.34
  -2   2  13  268.28   65.45
   2  -2 -12   89.02   48.16
   2  -2 -12   44.68   21.32
  -2   2  12   31.85   35.40
  -2   2  12   63.82   33.85
   2  -2 -11  750.25   88.55
   2  -2 -11  879.15   42.46
  -2   2  11  945.33   84.47
  -2   2  11  921.95   50.49
   2  -2 -10 1591.40   59.62
   2  -2 -10 1412.24  103.74
  -2   2  10 1589.12   98.61
  -2   2  10 1661.96   62.85
   2  -2  -913201.65  590.99
   2  -2  -913502.53  834.48
   2  -2  -913226.70  747.21
  -2   2   913231.32  715.70
  -2   2   912897.80  764.54
  -2   2   913011.42  585.93
   2  -2  -8    2.30   11.53
   2  -2  -8    0.03   25.26
   2  -2  -8   22.70   30.33
  -2   2   8    8.86   33.60
  -2   2   8    2.92   12.05
  -2   2   8   22.41   28.51
   2  -2  -7 2034.23   54.93
   2  -2  -7 2052.18  103.68
   2  -2  -7 1860.45   79.09
  -2   2   7 1968.11   57.22
  -2   2   7 1893.55   91.59
   2  -2  -6   61.19   20.09
   2  -2  -6   34.79    9.84
   2  -2  -6   83.58   29.90
  -2   2   6   48.31   10.22
  -2   2   6   41.87   19.22
  -2   2   6   95.54   33.70
   2  -2  -5  613.99   38.05
   2  -2  -5  553.74   18.18
   2  -2  -5  530.33   43.58
  -2   2   5  626.22   53.67
  -2   2   5  492.60   17.92
  -2   2   5  499.72   29.91
   2  -2  -411979.16  580.01
   2  -2  -412561.33  550.57
  -2   2   412630.41  591.92
  -2   2   412076.02  530.51
  -2   2   412173.77  479.39
   2  -2  -2 2414.35   68.43
   2  -2  -2 2200.44   84.84
   2  -2  -2 2383.72   56.94
  -2   2   2 2241.34   56.79
  -2   2   2 2379.23   71.62
  -2   2   2 2435.77   86.63
   2  -2  -1 1960.87   72.13
   2  -2  -1 1962.98   54.96
   2  -2  -1 2044.88   53.23
   2  -2  -1 1813.33   54.24
  -2   2   1 1998.95   54.47
  -2   2   1 2073.46   64.83
   2  -2   0  743.94   22.41
   2  -2   0  823.36   30.79
   2  -2   0  792.66   27.46
  -2   2   0  814.34   26.71
  -2   2   0  742.12   25.14
  -2   2   0  722.68   30.04
   2  -2   1 1432.21   49.59
   2  -2   1 1531.76   35.88
   2  -2   1 1484.52   36.52
  -2   2  -1 1567.46   45.64
  -2   2  -1 1549.54   36.89
   2  -2   3  234.07   12.75
   2  -2   3  163.38    9.89
  -2   2  -3  177.47   11.38
  -2   2  -3  204.03   15.42
   2  -2   4 7949.38  293.80
   2  -2   4 8285.54  273.82
  -2   2  -4 8023.35  259.52
  -2   2  -4 7882.91  284.18
   2  -2   5  356.45   14.10
   2  -2   5  326.47   14.77
   2  -2   5  394.60   27.36
  -2   2  -5  373.31   16.98
  -2   2  -5  351.74   18.07
  -2   2  -5  365.43   20.37
   2  -2   6   71.12    9.67
   2  -2   6   61.27   12.74
   2  -2   6   75.23   23.51
  -2   2  -6   93.09   15.10
  -2   2  -6   65.61   19.80
  -2   2  -6   71.01   11.77
   2  -2   7  556.40   25.45
   2  -2   7  673.39   25.76
   2  -2   7  634.29   39.06
  -2   2  -7  642.13   41.61
  -2   2  -7  673.84   26.68
  -2   2  -7  681.45   32.58
   2  -2   8 1620.94   46.29
   2  -2   8 1587.97   77.85
   2  -2   8 1641.24   58.79
  -2   2  -8 1598.35   62.06
  -2   2  -8 1536.56   62.58
  -2   2  -8 1570.52   65.27
   2  -2   9 8867.43  353.57
   2  -2   9 9202.95  372.08
   2  -2   9 9402.45  494.47
  -2   2  -9 9407.15  391.24
  -2   2  -9 8724.35  384.11
  -2   2  -9 9012.44  398.94
   2  -2  10  602.78   35.42
   2  -2  10  607.55   28.47
   2  -2  10  518.32   63.33
  -2   2 -10  645.23   41.86
  -2   2 -10  703.60   50.51
  -2   2 -10  603.05   57.98
   2  -2  11   88.78   24.37
  -2   2 -11   94.96   39.37
  -2   2 -11  104.38   27.85
  -2   2 -11   70.69   29.62
   2  -2  12  169.51   33.91
  -2   2 -12  161.27   47.85
  -2   2 -12   24.33   47.35
  -2   2 -12  108.58   33.07
   2  -2  13  137.72   32.42
  -2   2 -13  120.66   53.24
  -2   2 -13   47.17   34.67
   2  -2  14    2.74   29.46
  -2   2 -14   -9.55   33.77
  -2   2 -14   11.84   36.07
  -2   2 -15 1597.27  124.26
  -2   2 -15 1566.24  129.20
   2  -1 -14  -11.31   67.92
   2  -1 -14   58.84   28.23
  -2   1  14    3.02   50.10
   2  -1 -13    5.66   20.79
   2  -1 -13   12.41   45.01
  -2   1  13    6.43   39.46
   2  -1 -12   49.62   44.28
   2  -1 -12   30.98   19.75
  -2   1  12    8.15   38.57
  -2   1  12    3.16   22.39
   2  -1 -11 2035.94   73.05
   2  -1 -11 1873.87  153.03
  -2   1  11 1905.21   74.08
  -2   1  11 1888.05  110.88
   2  -1 -10  139.56   36.25
   2  -1 -10  176.45   20.16
   2  -1 -10  107.65   42.67
  -2   1  10  165.07   19.93
  -2   1  10   92.12   40.30
   2  -1  -9    3.42   24.64
   2  -1  -9  -20.03   42.06
   2  -1  -9   12.99   13.12
  -2   1   9   21.40   12.91
  -2   1   9    2.47   28.32
  -2   1   9  -26.50   47.33
   2  -1  -8 2013.46   57.43
   2  -1  -8 2167.37  107.61
   2  -1  -8 2106.20   97.38
  -2   1   8 1999.30   97.46
  -2   1   8 1965.28  114.88
  -2   1   8 2014.60   57.61
   2  -1  -7  800.05   24.75
   2  -1  -7  912.58   51.07
   2  -1  -7  857.93   55.06
  -2   1   7  811.19   24.56
  -2   1   7  796.49   60.21
  -2   1   7  816.33   47.98
   2  -1  -6 7321.38  228.09
   2  -1  -6 7143.32  333.09
   2  -1  -6 6963.11  277.46
  -2   1   6 6837.79  261.40
  -2   1   6 7047.91  222.72
  -2   1   6 6990.14  306.82
   2  -1  -5 4275.54  143.53
   2  -1  -5 4328.24  111.47
   2  -1  -5 4144.57  170.44
  -2   1   5 4357.01  169.27
  -2   1   5 4223.28  153.73
  -2   1   5 4071.99  106.86
   2  -1  -4 1442.08   66.36
   2  -1  -4 1430.48   31.53
   2  -1  -4 1400.85   46.73
  -2   1   4 1377.69   32.52
  -2   1   4 1319.58   47.92
  -2   1   4 1528.99   64.22
   2  -1  -315952.88  797.59
  -2   1   316128.68  798.27
   2  -1  -2   11.59    4.91
   2  -1  -2   23.49   17.54
   2  -1  -2    6.28   10.08
  -2   1   2   13.74    6.48
  -2   1   2   35.15   10.95
  -2   1   2   13.39   16.10
   2  -1  -1  197.65   11.27
   2  -1  -1  241.49   23.64
   2  -1  -1  199.26   11.07
  -2   1   1  139.24   12.67
  -2   1   1  149.98   18.02
  -2   1   1  208.88   13.54
   2  -1   1 1873.74   41.99
   2  -1   1 1766.14   49.32
   2  -1   1 1792.61   37.65
   2  -1   1 1865.00   41.39
  -2   1  -1 1846.22   42.58
  -2   1  -1 1805.37   44.03
   2  -1   4  490.18   19.48
   2  -1   4  452.43   24.95
   2  -1   4  492.79   15.44
  -2   1  -4  445.36   24.54
  -2   1  -4  426.03   17.17
  -2   1  -4  444.21   24.04
   2  -1   5 1334.40   32.52
   2  -1   5 1208.35   39.60
   2  -1   5 1308.35   54.69
  -2   1  -5 1314.64   49.96
  -2   1  -5 1254.63   44.32
  -2   1  -5 1293.91   35.19
   2  -1   6  128.22   16.11
   2  -1   6  112.28    9.84
   2  -1   6  128.83   26.14
  -2   1  -6   97.89   16.64
  -2   1  -6  146.65   23.09
  -2   1  -6  135.18   19.72
   2  -1   7 4979.05  174.04
   2  -1   7 5020.14  161.63
   2  -1   7 5196.48  225.05
  -2   1  -7 5111.40  183.23
  -2   1  -7 5015.15  183.98
  -2   1  -7 5144.02  168.56
   2  -1   815448.01  715.63
   2  -1   815309.18  743.51
   2  -1   814241.30  757.41
  -2   1  -815620.89  791.27
  -2   1  -814981.80  706.79
  -2   1  -814651.33  767.56
   2  -1   9  472.11   23.74
   2  -1   9  524.55   51.10
   2  -1   9  458.46   34.41
  -2   1  -9  492.07   28.62
  -2   1  -9  554.65   42.93
  -2   1  -9  635.29   50.34
   2  -1  10   47.82   15.59
   2  -1  10   40.98   46.66
   2  -1  10   34.22   21.69
  -2   1 -10   27.97   34.56
  -2   1 -10   46.75   15.97
  -2   1 -10   14.56   29.13
   2  -1  11   -4.38   23.14
  -2   1 -11   14.68   33.81
  -2   1 -11   16.19   31.90
  -2   1 -11    4.63   24.00
   2  -1  12  303.43   41.73
  -2   1 -12  386.57   32.89
  -2   1 -12  353.53   62.49
   2  -1  13  458.86   52.32
  -2   1 -13  419.76   77.21
  -2   1 -13  376.26   49.84
   2  -1  14   40.72   39.26
  -2   1 -14   21.52   27.40
  -2   1 -14   24.78   57.63
   2   0 -15  672.65  139.63
   2   0 -15  943.62   72.27
  -2   0  15 1095.05  112.04
   2   0 -14  326.89   39.63
   2   0 -14  192.04   69.26
  -2   0  14  380.79   69.79
   2   0 -13 1032.72   91.73
   2   0 -13 1041.23   56.56
  -2   0  13 1001.34   87.55
   2   0 -12  346.65   31.18
   2   0 -12  486.74   77.61
  -2   0  12  302.04   50.75
  -2   0  12  349.81   30.34
   2   0 -11 1133.61   94.45
   2   0 -11 1218.10   50.02
   2   0 -11 1152.06   92.25
  -2   0  11 1282.28   69.22
  -2   0  11 1215.67   47.03
   2   0 -10 4433.67  246.63
   2   0 -10 4209.08  207.86
   2   0 -10 4056.31  140.45
  -2   0  10 4326.24  239.85
  -2   0  10 4220.52  136.71
  -2   0  10 4023.66  173.65
   2   0  -9 2468.87   75.10
   2   0  -9 2625.63  116.84
   2   0  -9 2443.42  124.70
  -2   0   9 2178.39  134.13
  -2   0   9 2460.45   70.05
  -2   0   9 2515.66  111.18
   2   0  -8   92.06   11.42
   2   0  -8   71.65   31.68
   2   0  -8   86.88   25.09
  -2   0   8  101.09   10.74
  -2   0   8   91.99   26.35
  -2   0   8   88.58   32.47
   2   0  -7 2610.86   68.40
   2   0  -7 2554.03  110.80
   2   0  -7 2719.73   92.53
  -2   0   7 2713.26  119.51
  -2   0   7 2668.56   66.64
  -2   0   7 2680.49   90.24
   2   0  -6 1187.19   30.30
   2   0  -6 1281.55   50.55
   2   0  -6 1094.79   59.03
  -2   0   6 1146.50   51.53
  -2   0   6 1147.13   26.86
  -2   0   6 1163.67   58.99
   2   0  -518501.98 1002.78
  -2   0   518857.76 1017.63
   2   0  -415859.96  794.68
   2   0  -3 3199.70   89.38
   2   0  -3 3223.52  109.43
  -2   0   3 3115.07   91.09
  -2   0   3 3329.77  108.96
   2   0  -2  380.89   15.41
   2   0  -2  333.07   27.68
  -2   0   2  353.71   24.31
  -2   0   2  327.78   16.35
   2   0  -1    9.23    3.43
   2   0  -1   13.05   14.14
   2   0  -1   28.36   11.55
   2   0  -1   -3.94    8.52
  -2   0   1   15.69    3.55
   2   0   0 2213.50   46.37
   2   0   0 2280.33   45.70
   2   0   0 2296.28   66.14
  -2   0   0 2415.97   50.60
  -2   0   0 2401.26   64.04
   2   0   2  818.11   19.10
   2   0   2  920.78   32.73
   2   0   2  746.71   23.25
  -2   0  -2  775.32   20.69
  -2   0  -2  838.43   34.06
  -2   0  -2  815.29   24.81
   2   0   311547.50  469.71
   2   0   4  167.43   20.91
   2   0   4  192.55   18.31
   2   0   4  147.30    9.51
  -2   0  -4  148.29   18.54
  -2   0  -4  181.39   14.76
  -2   0  -4  158.24   19.53
   2   0   5 1582.41   43.79
   2   0   5 1522.98   65.16
   2   0   5 1596.55   55.11
  -2   0  -5 1629.41   62.40
  -2   0  -5 1605.36   42.99
  -2   0  -5 1530.15   61.24
   2   0   6 1494.02   57.74
   2   0   6 1706.22   44.94
   2   0   6 1655.70   77.23
  -2   0  -6 1714.03   55.07
  -2   0  -6 1592.52   64.67
  -2   0  -6 1765.48   71.45
   2   0   7   49.28   11.12
   2   0   7   44.03   18.83
   2   0   7   53.27   32.41
  -2   0  -7   38.66   25.33
  -2   0  -7   37.41   22.15
  -2   0  -7   43.49   13.90
   2   0   8 5169.04  201.30
   2   0   8 5423.09  176.97
   2   0   8 4987.96  257.71
  -2   0  -8 5174.55  227.31
  -2   0  -8 5037.33  217.42
  -2   0  -8 5338.79  183.24
   2   0   9 2569.66  104.36
   2   0   9 2582.34  160.00
   2   0   9 2622.73   93.83
  -2   0  -9 2617.37  130.02
  -2   0  -9 2574.81  122.67
  -2   0  -9 2738.59   99.93
   2   0  10   10.50   24.62
   2   0  10   15.82   50.54
  -2   0 -10   27.53   20.25
  -2   0 -10   19.60   34.40
  -2   0 -10   14.21   34.72
   2   0  11  567.04   49.80
  -2   0 -11  479.20   53.06
  -2   0 -11  520.54   33.75
  -2   0 -11  349.38   68.31
   2   0  12  434.96   50.14
  -2   0 -12  344.53   44.62
  -2   0 -12  342.04   64.48
   2   0  13 2266.74  136.08
  -2   0 -13 2337.08  105.06
  -2   0 -13 2302.64  136.25
   2   0  14   70.67   44.03
  -2   0 -14   14.61   37.77
  -2   0 -14   22.57   44.91
   2   1 -15   47.59   30.45
   2   1 -15  -32.40   49.25
  -2  -1  15  -14.12   49.34
   2   1 -14  162.39   30.88
   2   1 -14  119.98   55.49
  -2  -1  14  125.44   48.70
   2   1 -13   32.71   41.61
   2   1 -13   57.14   23.83
  -2  -1  13   75.42   39.66
  -2  -1  13   29.16   26.40
   2   1 -12   -0.24   32.46
   2   1 -12   -3.60   18.07
   2   1 -12  -10.92   36.33
  -2  -1  12   12.20   16.25
  -2  -1  12   28.02   32.06
   2   1 -11 1016.96   71.71
   2   1 -11  987.80   87.25
   2   1 -11  935.46   43.45
  -2  -1  11  890.00   36.79
  -2  -1  11  971.37   69.97
   2   1 -10  999.81   61.87
   2   1 -10  949.74   37.17
   2   1 -10 1068.98   70.62
  -2  -1  10  796.22   31.11
  -2  -1  10  881.76   83.42
  -2  -1  10  788.64   57.98
   2   1  -9  119.28   28.91
   2   1  -9   50.90   13.15
   2   1  -9   57.81   19.43
  -2  -1   9   33.41   25.35
  -2  -1   9   48.31   10.97
  -2  -1   9   45.05   34.71
   2   1  -8 1372.67   50.11
   2   1  -8 1334.70   38.50
   2   1  -8 1281.15   67.42
  -2  -1   8 1342.25   51.41
  -2  -1   8 1331.39   33.87
  -2  -1   8 1458.79   75.96
   2   1  -7  367.20   14.75
   2   1  -7  358.44   35.61
   2   1  -7  347.19   22.15
  -2  -1   7  317.12   23.03
  -2  -1   7  367.54   37.62
  -2  -1   7  371.41   12.61
   2   1  -6  339.98   24.97
   2   1  -6  333.74   15.50
   2   1  -6  346.44   31.12
  -2  -1   6  389.37   41.12
  -2  -1   6  390.66   27.90
  -2  -1   6  357.90   12.31
   2   1  -5 2734.52   79.03
   2   1  -5 2562.44   62.58
   2   1  -5 2548.95   96.22
  -2  -1   5 2746.29  102.31
  -2  -1   5 2695.45   60.93
  -2  -1   5 2621.24   87.67
   2   1  -3  129.48   12.09
   2   1  -3  127.44   17.06
   2   1  -3  142.11   17.73
  -2  -1   3  111.28   11.65
  -2  -1   3  122.62    6.32
  -2  -1   3  153.50   22.47
   2   1  -2 6779.87  226.51
   2   1  -2 6854.23  240.12
  -2  -1   2 6559.65  222.69
   2   1  -1 8805.30  338.79
   2   1   0  286.39    7.07
   2   1   0  337.59   33.10
   2   1   0  294.58    8.58
  -2  -1   0  297.20   30.71
  -2  -1   0  300.50    9.62
  -2  -1  -212921.43  568.36
   2   1   3 2981.33   75.15
   2   1   3 3104.78   98.91
   2   1   3 2991.33  107.72
  -2  -1  -3 2932.83   75.55
  -2  -1  -3 3016.43  111.31
  -2  -1  -3 2918.16   90.88
   2   1   4 5467.38  160.38
   2   1   4 5213.93  195.64
   2   1   4 5310.70  196.86
  -2  -1  -4 5492.28  163.55
  -2  -1  -4 5173.87  184.30
  -2  -1  -4 5605.73  212.38
   2   1   5    6.57    7.50
   2   1   5  -11.40   20.48
   2   1   5   -3.84   17.92
  -2  -1  -5    9.54    9.08
  -2  -1  -5    2.18   18.41
   2   1   6 5387.40  233.80
   2   1   6 5610.53  175.67
   2   1   6 5550.95  214.36
  -2  -1  -6 5456.39  226.47
  -2  -1  -6 5486.93  221.96
  -2  -1  -6 5398.08  176.37
   2   1   7 7592.45  351.37
   2   1   7 7049.88  300.32
   2   1   7 7062.11  248.81
  -2  -1  -7 7085.32  256.45
  -2  -1  -7 7085.37  313.89
  -2  -1  -7 7273.78  331.95
   2   1   8   82.89   14.77
   2   1   8  103.84   44.48
   2   1   8   93.77   28.74
  -2  -1  -8  110.20   37.15
  -2  -1  -8   38.57   34.77
  -2  -1  -8  114.96   16.82
   2   1   9  103.00   52.27
   2   1   9   79.44   22.90
   2   1   9   73.61   32.22
  -2  -1  -9   86.89   42.57
  -2  -1  -9  143.43   18.01
  -2  -1  -9  184.00   37.81
   2   1  10   42.94   31.73
   2   1  10   45.53   56.99
  -2  -1 -10   26.86   42.40
  -2  -1 -10   19.04   23.19
  -2  -1 -10   76.94   29.44
   2   1  11  169.75   41.51
  -2  -1 -11  195.33   65.30
  -2  -1 -11  165.65   31.15
  -2  -1 -11   86.36   50.13
   2   1  12  277.57   59.94
  -2  -1 -12  405.36   76.89
  -2  -1 -12  462.93   46.55
   2   1  13   43.63   41.70
  -2  -1 -13   24.71   26.06
  -2  -1 -13   -5.40   54.79
   2   1  14  317.42   76.67
  -2  -1 -14  532.03   98.54
  -2  -1 -14  223.23   66.99
   2   2 -15  245.36   32.12
   2   2 -15  313.41   62.20
  -2  -2  15  148.80   62.21
   2   2 -14  -40.55   26.75
   2   2 -14  -27.71   55.66
  -2  -2  14    1.53   38.75
   2   2 -13  -20.84   34.23
   2   2 -13    0.37   41.03
   2   2 -13   -5.05   21.45
  -2  -2  13   10.49   16.35
  -2  -2  13   -2.97   32.74
   2   2 -12   25.98   39.14
   2   2 -12  112.29   36.16
   2   2 -12   62.62   22.73
  -2  -2  12   40.93   36.65
  -2  -2  12   98.83   19.00
   2   2 -11 6314.71  348.53
   2   2 -11 6707.68  306.30
   2   2 -11 6670.23  252.50
  -2  -2  11 6843.76  313.48
  -2  -2  11 6820.62  240.92
   2   2 -10   75.95   30.59
   2   2 -10   25.50   24.18
   2   2 -10   49.95   15.10
  -2  -2  10   36.28   33.95
  -2  -2  10   37.87   12.54
  -2  -2  10   26.87   27.17
   2   2  -9   19.23   19.96
   2   2  -9   40.52   13.10
   2   2  -9   57.55   26.97
  -2  -2   9   45.78   23.75
  -2  -2   9   38.38    9.43
  -2  -2   9   66.24   30.34
   2   2  -8  526.67   39.94
   2   2  -8  543.88   23.30
   2   2  -8  584.58   31.67
  -2  -2   8  539.36   17.55
  -2  -2   8  564.81   36.33
  -2  -2   8  536.35   45.27
   2   2  -7   17.17   18.18
   2   2  -7   -2.76    8.99
   2   2  -7   -5.35   14.31
  -2  -2   7    6.75    6.42
  -2  -2   7    1.84   16.18
  -2  -2   7    4.12   19.78
   2   2  -614950.76  721.19
  -2  -2   614074.52  654.85
  -2  -2   615035.16  742.30
  -2  -2   614914.56  691.73
   2   2  -5 6298.68  243.70
   2   2  -5 6487.38  222.28
   2   2  -5 6227.68  227.39
  -2  -2   5 6135.72  220.20
  -2  -2   5 6401.05  237.37
   2   2  -4 6064.53  238.84
   2   2  -4 5802.39  202.11
   2   2  -4 6374.85  213.84
  -2  -2   4 6650.77  207.84
  -2  -2   4 6073.50  221.36
   2   2  -3  -11.72   12.54
   2   2  -3    6.77   20.31
  -2  -2   3   20.15   14.59
  -2  -2   3   43.73   11.26
  -2  -2   3   36.65    8.16
   2   2  -2  941.29   44.03
   2   2  -2  959.73   25.76
   2   2  -2 1072.47   31.17
  -2  -2   2  946.12   25.01
  -2  -2   2  952.02   28.63
  -2  -2   2 1047.49   41.18
   2   2  -1 1090.17   52.33
   2   2  -1 1096.52   28.53
   2   2  -1 1108.71   24.37
  -2  -2   1 1147.83   27.18
  -2  -2   1 1200.58   45.84
  -2  -2   1 1084.58   29.02
   2   2   014884.37  719.68
   2   2   1  753.60   47.57
   2   2   1  583.01   17.25
  -2  -2  -1  565.10   16.82
  -2  -2  -1  664.45   29.87
  -2  -2  -1  575.66   18.15
  -2  -2  -1  655.20   36.34
   2   2   214707.07  725.62
  -2  -2  -214674.98  711.05
   2   2   3  434.65   16.25
   2   2   3  475.83   30.15
   2   2   3  578.21   38.81
  -2  -2  -3  512.88   39.82
  -2  -2  -3  423.38   16.80
  -2  -2  -3  512.82   31.09
   2   2   4   15.52   19.25
   2   2   4    3.65   21.11
   2   2   4   -1.78    7.94
  -2  -2  -4   16.19   19.25
  -2  -2  -4    2.62   22.94
  -2  -2  -4    8.36    8.97
   2   2   5 1670.33   76.28
   2   2   5 1522.03   62.34
   2   2   5 1300.32   40.71
  -2  -2  -5 1737.23   74.53
  -2  -2  -5 1598.99   44.54
  -2  -2  -5 1616.46   78.92
   2   2   6  221.26   40.34
   2   2   6  255.90   16.39
   2   2   6  209.14   35.22
  -2  -2  -6  345.29   41.21
  -2  -2  -6  193.15   38.90
  -2  -2  -6  214.08   23.06
   2   2   714745.78  765.13
   2   2   714745.50  671.21
   2   2   713215.06  754.74
  -2  -2  -713870.61  776.46
  -2  -2  -714697.65  695.63
  -2  -2  -713616.39  726.28
   2   2   8   26.71   27.61
   2   2   8   -3.52   38.57
   2   2   8   10.61   14.39
  -2  -2  -8    0.78   13.86
  -2  -2  -8  -10.89   36.13
  -2  -2  -8   27.73   30.53
   2   2   9   56.30   46.74
   2   2   9   39.49   32.32
  -2  -2  -9   24.48   16.72
  -2  -2  -9   18.65   42.26
  -2  -2  -9   27.34   37.12
   2   2  10   46.17   36.07
   2   2  10   -5.32   61.61
  -2  -2 -10    7.67   51.44
  -2  -2 -10   63.39   40.65
  -2  -2 -10   16.45   18.14
   2   2  11  190.92   49.60
  -2  -2 -11  200.46   28.79
  -2  -2 -11  238.19   58.99
   2   2  12  933.96   91.23
  -2  -2 -12  934.55   58.00
  -2  -2 -12  893.42  105.18
   2   2  13 1077.20  115.81
  -2  -2 -13 1184.84   85.16
  -2  -2 -13 1056.74  141.33
   2   3 -16  163.38   64.15
   2   3 -16  106.77   77.51
  -2  -3  16  147.47   85.62
   2   3 -15  -34.73   41.62
   2   3 -15    7.51   48.35
  -2  -3  15   43.64   54.48
   2   3 -14  234.74   65.84
   2   3 -14  350.43   76.56
  -2  -3  14  393.14   73.34
   2   3 -13 1094.18   89.71
   2   3 -13  891.61   81.96
   2   3 -13  783.27   77.32
  -2  -3  13  946.78   42.96
  -2  -3  13  729.24   93.42
   2   3 -12  155.52   40.92
   2   3 -12  271.13   51.23
   2   3 -12  170.35   46.49
  -2  -3  12  211.91   57.67
  -2  -3  12  276.95   21.64
   2   3 -11 2448.94  131.16
   2   3 -11 2362.77  106.95
   2   3 -11 2127.28  113.73
  -2  -3  11 2290.81   71.61
  -2  -3  11 2278.10  126.70
   2   3 -10 3152.53  152.04
   2   3 -10 3124.23  123.99
   2   3 -10 3302.14  148.54
  -2  -3  10 3147.91   91.69
  -2  -3  10 3166.47  163.04
  -2  -3  10 3276.63  151.06
   2   3  -9  411.12   36.40
   2   3  -9  289.28   37.21
   2   3  -9  298.12   27.46
  -2  -3   9  451.11   40.04
  -2  -3   9  289.72   38.46
  -2  -3   9  274.54   15.43
   2   3  -8 3490.10  119.06
   2   3  -8 3552.37  147.29
   2   3  -8 3364.95  135.77
  -2  -3   8 3516.33  146.05
  -2  -3   8 3531.69  143.16
  -2  -3   8 3435.63   93.78
   2   3  -7 7982.40  297.37
   2   3  -7 7415.09  320.40
   2   3  -7 7398.49  304.89
  -2  -3   7 7915.88  328.09
  -2  -3   7 7543.33  307.78
  -2  -3   7 7914.71  257.40
   2   3  -617318.73  920.56
   2   3  -617126.77  877.86
  -2  -3   617692.47  906.40
  -2  -3   617783.01  894.85
   2   3  -521476.73 1225.19
   2   3  -521461.75 1165.28
  -2  -3   521235.48 1165.84
   2   3  -4    1.93   11.78
   2   3  -4   11.22   23.41
   2   3  -4   -0.79   13.51
  -2  -3   4   15.02   12.10
  -2  -3   4   23.01   12.55
  -2  -3   4   18.56   18.42
   2   3  -3   11.73   13.07
   2   3  -3    3.64   19.20
   2   3  -3   15.46   12.67
  -2  -3   3   16.76   11.30
  -2  -3   3    0.81    8.64
  -2  -3   3   19.62   18.82
   2   3  -211564.19  522.86
  -2  -3   211728.69  520.95
   2   3  -1  296.58   32.06
   2   3  -1  233.00   12.93
   2   3  -1  227.39   12.93
  -2  -3   1  282.95   15.86
  -2  -3   1  250.30   28.27
  -2  -3   1  272.47   12.54
   2   3   1 3589.67   99.42
   2   3   1 3553.41  138.46
  -2  -3  -1 3640.01  119.17
  -2  -3  -1 3626.14   95.85
  -2  -3  -1 3611.11  139.44
  -2  -3  -1 3617.52  100.33
   2   3   2    8.30   14.43
   2   3   2   14.78   26.70
   2   3   2    4.04    8.07
  -2  -3  -2   13.50   21.13
  -2  -3  -2    8.48    8.56
  -2  -3  -2   -2.69   17.73
   2   3   3 1728.90   45.82
   2   3   3 1513.05   63.57
   2   3   3 1487.62   66.02
  -2  -3  -3 1619.00   73.17
  -2  -3  -3 1609.57   68.68
  -2  -3  -3 1676.64   45.03
   2   3   4  -26.03   18.72
   2   3   4    9.55   21.08
   2   3   4   10.73   12.12
  -2  -3  -4   11.40   12.30
  -2  -3  -4    5.79   22.08
  -2  -3  -4  -13.14   25.20
   2   3   5 2191.11   73.65
   2   3   5 2131.36   93.17
   2   3   5 2389.44  107.85
  -2  -3  -5 2237.82   67.10
  -2  -3  -5 2621.53  107.45
  -2  -3  -5 2268.49  107.40
   2   3   6 6177.74  286.73
   2   3   6 6052.53  211.08
   2   3   6 5994.74  281.05
  -2  -3  -6 6128.11  215.67
  -2  -3  -6 5928.32  271.30
  -2  -3  -6 6006.14  268.25
   2   3   7  638.52   33.29
   2   3   7  785.71   67.90
   2   3   7  710.13   60.44
  -2  -3  -7  691.66   60.25
  -2  -3  -7  598.26   60.33
  -2  -3  -7  591.27   37.56
   2   3   8  325.17   48.56
   2   3   8  138.12   61.49
   2   3   8  251.83   23.62
  -2  -3  -8  272.31   23.55
  -2  -3  -8  157.43   52.40
  -2  -3  -8  311.51   60.11
   2   3   9   40.71   57.87
   2   3   9   47.57   39.12
  -2  -3  -9   54.02   56.57
  -2  -3  -9   72.29   25.53
  -2  -3  -9  108.10   43.39
   2   3  10   36.69   30.67
  -2  -3 -10   32.64   25.59
  -2  -3 -10    2.37   44.04
   2   3  11  605.93   79.16
  -2  -3 -11  566.38   86.93
  -2  -3 -11  519.62   50.40
   2   3  12   26.49   50.30
  -2  -3 -12  -10.95   58.39
  -2  -3 -12   15.18   25.48
   2   3  13  110.43   64.07
  -2  -3 -13   64.62   47.94
  -2  -3 -13  169.44   77.51
   2   4 -16   37.15   64.99
   2   4 -16   64.09   63.36
  -2  -4  16   23.69   67.34
   2   4 -15  228.07   53.49
   2   4 -15  149.86   71.34
  -2  -4  15  167.16   72.21
   2   4 -14    8.18   44.87
   2   4 -14    7.70   46.13
   2   4 -14   16.19   35.66
  -2  -4  14   26.33   51.02
   2   4 -13  603.05   61.50
   2   4 -13  561.47   75.26
   2   4 -13  567.94   60.12
  -2  -4  13  642.54   35.79
  -2  -4  13  414.86   80.12
   2   4 -12 3244.85  184.69
   2   4 -12 2974.07  182.19
   2   4 -12 3265.32  149.28
  -2  -4  12 3362.35  110.45
  -2  -4  12 3413.92  195.10
   2   4 -11   70.48   24.74
   2   4 -11   57.58   36.19
   2   4 -11   63.75   29.74
  -2  -4  11   55.59   14.37
  -2  -4  11   19.02   38.31
   2   4 -10   12.39   23.22
   2   4 -10   54.11   29.78
   2   4 -10    3.19   20.54
  -2  -4  10    4.16   11.58
  -2  -4  10    3.76   27.49
  -2  -4  10  -17.00   27.98
   2   4  -9  184.24   38.17
   2   4  -9  277.53   23.69
   2   4  -9  250.38   28.64
  -2  -4   9  165.69   36.01
  -2  -4   9  276.62   34.31
  -2  -4   9  212.67   15.49
   2   4  -8   53.06   17.75
   2   4  -8   51.41   30.45
   2   4  -8   50.41   20.19
  -2  -4   8   37.46    9.60
  -2  -4   8    6.21   24.21
  -2  -4   8   47.61   22.93
   2   4  -7 4436.11  161.01
   2   4  -7 4253.01  141.93
   2   4  -7 4156.39  178.19
  -2  -4   7 4283.61  164.64
  -2  -4   7 4233.20  122.83
   2   4  -6 4468.87  153.92
   2   4  -6 4366.08  185.10
   2   4  -6 4195.87  133.75
  -2  -4   6 4206.85  164.35
  -2  -4   6 4217.13  157.20
   2   4  -5 7978.59  291.42
   2   4  -5 7473.45  333.45
   2   4  -5 7992.57  311.42
  -2  -4   5 7565.57  312.93
  -2  -4   5 7969.01  299.48
  -2  -4   5 7603.83  285.96
   2   4  -4   58.67   17.18
   2   4  -4   44.71   15.53
   2   4  -4   23.60   23.30
  -2  -4   4   72.74   17.82
  -2  -4   4   14.15   16.68
  -2  -4   4   30.92   14.24
   2   4  -3 2047.94   70.08
   2   4  -3 2134.67   64.92
   2   4  -3 2215.79   93.46
  -2  -4   3 2045.89   80.22
  -2  -4   3 2175.72   58.12
  -2  -4   3 2293.68   70.13
   2   4  -2 5160.08  235.75
   2   4  -2 5205.83  165.46
   2   4  -2 5309.87  161.19
  -2  -4   2 5315.53  162.16
  -2  -4   2 5176.57  201.52
  -2  -4   2 5099.34  166.35
   2   4  -1  420.18   20.25
   2   4  -1  542.64   42.26
   2   4  -1  417.11   19.94
  -2  -4   1  405.35   19.70
  -2  -4   1  484.37   38.90
  -2  -4   1  487.31   17.47
   2   4   0  336.91   33.65
   2   4   0  320.80   17.78
   2   4   0  281.69   15.89
  -2  -4   0  257.32   13.70
  -2  -4   0  233.60   16.03
  -2  -4   0  303.66   32.38
   2   4   119505.81 1121.04
  -2  -4  -120193.25 1148.67
  -2  -4  -119952.53 1065.59
   2   4   2 1872.87   84.73
   2   4   2 1989.60   55.72
  -2  -4  -2 1909.83   55.35
  -2  -4  -2 1984.34   57.58
  -2  -4  -2 2048.82   82.48
  -2  -4  -2 1896.87   93.72
   2   4   3 3127.46  100.20
   2   4   3 3733.55  148.06
  -2  -4  -3 3828.71  156.52
  -2  -4  -3 3981.18  156.16
  -2  -4  -3 3886.44  113.86
   2   4   4 4011.59  126.20
   2   4   4 3626.19  157.56
   2   4   4 3863.29  160.45
  -2  -4  -4 4091.23  203.40
  -2  -4  -4 3876.11  121.47
  -2  -4  -4 3843.24  168.21
   2   4   510467.17  540.93
   2   4   510138.19  503.45
   2   4   510730.90  445.17
  -2  -4  -510399.00  518.55
  -2  -4  -510300.08  518.83
  -2  -4  -510578.16  436.94
   2   4   6 6350.07  314.19
   2   4   6 6399.52  291.58
   2   4   6 6099.55  227.42
  -2  -4  -6 6532.31  253.57
  -2  -4  -6 6232.78  316.02
  -2  -4  -6 6530.69  318.92
   2   4   7 1065.57   95.24
   2   4   7 1082.67   45.92
   2   4   7 1379.04   90.88
  -2  -4  -7 1027.32  110.86
  -2  -4  -7 1055.06   50.11
  -2  -4  -7 1130.10   89.66
   2   4   8  163.10   68.81
   2   4   8  249.17   39.48
  -2  -4  -8  297.97   24.93
  -2  -4  -8  271.67   56.20
  -2  -4  -8  310.70   58.72
   2   4   9  223.20   73.90
   2   4   9   98.31   49.50
  -2  -4  -9  129.40   29.90
  -2  -4  -9   66.38   52.85
   2   4  10   -1.70   45.98
  -2  -4 -10    6.80   25.60
  -2  -4 -10  -42.58   45.44
   2   4  11 1090.12  113.70
  -2  -4 -11 1145.37   81.74
  -2  -4 -11 1160.55  139.35
   2   4  12  173.26   75.45
  -2  -4 -12  201.59   81.65
  -2  -4 -12  116.86   48.89
   2   5 -16  198.94   68.79
   2   5 -16  -33.22   71.16
  -2  -5  16  168.66   72.77
   2   5 -15   89.80   55.90
   2   5 -15   52.28   46.03
  -2  -5  15   90.55   60.82
   2   5 -14   25.72   32.92
   2   5 -14    1.34   39.82
   2   5 -14  -11.04   42.75
  -2  -5  14  -20.40   44.65
   2   5 -13  481.25   69.41
   2   5 -13  447.84   66.77
   2   5 -13  461.92   48.33
  -2  -5  13  488.31   32.70
  -2  -5  13  566.20   72.62
   2   5 -12 3007.56  169.04
   2   5 -12 3134.20  135.60
   2   5 -12 2885.83  151.40
  -2  -5  12 3147.48  105.61
  -2  -5  12 2935.45  172.38
   2   5 -11   21.61   35.62
   2   5 -11   20.35   22.90
   2   5 -11   63.25   27.13
  -2  -5  11   33.15   14.84
  -2  -5  11   37.06   34.07
   2   5 -10 1502.07   90.78
   2   5 -10 1414.50   74.73
   2   5 -10 1666.21   65.84
  -2  -5  10 1636.39   89.12
  -2  -5  10 1536.22   49.15
  -2  -5  10 1673.90   97.51
   2   5  -9   80.39   18.85
   2   5  -9   79.68   32.27
   2   5  -9   46.06   22.92
  -2  -5   9   73.02   28.64
  -2  -5   9    2.31   26.18
  -2  -5   9   82.11   13.81
   2   5  -8  283.11   22.98
   2   5  -8  155.93   41.11
   2   5  -8  210.09   25.95
  -2  -5   8  238.35   32.05
  -2  -5   8  237.34   15.96
  -2  -5   8  159.41   29.50
   2   5  -7 2560.75   87.67
   2   5  -7 2723.78  128.33
   2   5  -7 2693.11   94.27
  -2  -5   7 2661.92  104.54
  -2  -5   7 2478.50   96.42
  -2  -5   7 2492.94   74.90
   2   5  -620556.15 1245.75
   2   5  -621061.17 1221.12
  -2  -5   621322.15 1207.69
  -2  -5   620767.28 1151.97
   2   5  -5  958.00   37.31
   2   5  -5 1136.29   53.32
   2   5  -5  979.34   56.40
  -2  -5   5 1003.99   37.87
  -2  -5   5 1046.48   44.75
  -2  -5   5 1130.18   49.39
   2   5  -4 2338.24  115.22
   2   5  -4 2405.17   72.37
   2   5  -4 2383.80   79.18
  -2  -5   4 2466.97   85.91
  -2  -5   4 2502.91   80.43
  -2  -5   4 2283.87   90.60
   2   5  -3   29.06   13.88
   2   5  -3   39.80   14.83
   2   5  -3   36.28   33.75
  -2  -5   3   52.11   13.37
  -2  -5   3   26.97   23.11
  -2  -5   3   53.92   13.03
   2   5  -2 2047.44   62.81
   2   5  -2 2255.02  100.61
   2   5  -2 2023.92   73.28
  -2  -5   2 2055.56   59.02
  -2  -5   2 1950.44   61.38
  -2  -5   2 2046.95   87.31
   2   5  -118880.57 1077.54
  -2  -5   119194.34 1092.06
   2   5   0 3408.83  110.69
   2   5   0 3580.73  151.95
   2   5   0 3485.68  108.05
  -2  -5   0 3390.24  104.44
  -2  -5   0 3451.79  147.50
  -2  -5   0 3568.23  101.42
   2   5   1  364.99   37.45
   2   5   1  335.57   20.54
  -2  -5  -1  251.12   18.31
  -2  -5  -1  291.78   35.17
  -2  -5  -1  325.50   37.15
  -2  -5  -1  320.50   20.18
   2   5   2  274.16   18.81
   2   5   2  269.87   34.70
  -2  -5  -2  233.45   35.68
  -2  -5  -2  196.21   18.94
  -2  -5  -2  216.27   40.02
  -2  -5  -2  297.20   21.91
   2   5   3   10.77   12.56
   2   5   3    3.61   23.32
  -2  -5  -3  -53.22   26.12
  -2  -5  -3    4.39   13.94
  -2  -5  -3  -20.10   26.12
  -2  -5  -3    8.75   11.43
   2   5   4 2465.81  117.98
   2   5   4 2555.94   86.78
  -2  -5  -4 2616.18  129.27
  -2  -5  -4 2391.81  131.30
  -2  -5  -4 2517.15   83.05
  -2  -5  -4 2581.62   90.47
   2   5   5 2799.64  140.66
   2   5   5 2710.58   96.50
   2   5   5 2736.91  132.67
  -2  -5  -5 2872.35  183.78
  -2  -5  -5 2670.65  145.73
  -2  -5  -5 2653.62   92.36
   2   5   6 2210.50  127.32
   2   5   6 2211.94  114.78
   2   5   6 2234.86   85.42
  -2  -5  -6 2326.02  145.97
  -2  -5  -6 2174.99  128.95
  -2  -5  -6 2143.77   75.55
   2   5   7  -10.90   42.49
   2   5   7   14.10   41.14
  -2  -5  -7   18.72   15.50
  -2  -5  -7   -4.02   41.46
   2   5   8    5.70   48.25
   2   5   8   15.01   31.79
  -2  -5  -8   -0.62   43.19
  -2  -5  -8   -9.19   16.79
   2   5   9  -18.02   46.18
  -2  -5  -9   18.91   46.90
  -2  -5  -9   18.56   25.10
   2   5  10   55.73   58.25
  -2  -5 -10   90.72   61.71
  -2  -5 -10   66.46   24.91
   2   5  11   99.76   50.66
  -2  -5 -11   74.29   31.97
  -2  -5 -11  259.17   76.97
   2   6 -16  -15.13   55.48
  -2  -6  16  -13.07   60.46
   2   6 -15  -34.29   50.06
   2   6 -15  -20.78   52.82
  -2  -6  15   -4.94   54.43
   2   6 -14  325.36   52.73
   2   6 -14  227.27   70.59
  -2  -6  14  378.45   72.36
   2   6 -13 1744.88  122.49
   2   6 -13 1295.42   91.98
   2   6 -13 1637.04   85.28
  -2  -6  13 1604.13   71.09
  -2  -6  13 1542.53  120.71
   2   6 -12   38.35   25.84
   2   6 -12   41.11   30.99
   2   6 -12   11.66   41.32
  -2  -6  12   48.28   41.32
  -2  -6  12   28.54   18.32
   2   6 -11  340.32   34.42
   2   6 -11  362.37   39.15
   2   6 -11  225.56   54.50
  -2  -6  11  306.43   24.22
  -2  -6  11  366.71   51.37
   2   6 -10  511.48   34.24
   2   6 -10  392.06   56.12
   2   6 -10  481.26   40.67
  -2  -6  10  441.59   25.32
  -2  -6  10  256.71   49.59
  -2  -6  10  443.37   51.91
   2   6  -9  357.25   43.83
   2   6  -9  245.46   53.36
   2   6  -9  343.38   28.34
  -2  -6   9  331.71   44.45
  -2  -6   9  299.86   21.96
  -2  -6   9  287.35   46.17
   2   6  -810992.57  567.92
   2   6  -811044.06  482.41
   2   6  -810714.55  495.81
  -2  -6   811040.38  462.19
  -2  -6   810721.16  513.67
  -2  -6   811319.62  525.25
   2   6  -7  650.13   43.57
   2   6  -7  722.09   37.06
   2   6  -7  647.33   63.45
  -2  -6   7  628.86   46.14
  -2  -6   7  582.79   45.67
  -2  -6   7  681.10   47.41
   2   6  -6 3850.77  183.54
   2   6  -6 3589.06  127.38
   2   6  -6 3682.95  154.14
  -2  -6   6 3626.38  126.01
  -2  -6   6 3768.35  154.91
  -2  -6   6 3682.57  143.67
   2   6  -5 2172.97   69.80
   2   6  -5 2358.92   99.40
   2   6  -5 2287.92  121.75
  -2  -6   5 2182.47   69.37
  -2  -6   5 2113.76   81.68
  -2  -6   5 2312.67  104.53
   2   6  -4   30.90   25.81
   2   6  -4   19.97   12.14
   2   6  -4   10.17   22.80
  -2  -6   4   15.35   14.66
  -2  -6   4   40.00   23.45
  -2  -6   4   12.94   16.05
   2   6  -3  120.01   32.31
   2   6  -3  122.33   14.37
   2   6  -3   92.08   20.39
  -2  -6   3  163.50   28.54
  -2  -6   3   77.69   20.28
  -2  -6   3  105.24   16.59
   2   6  -218292.25 1050.05
   2   6  -218187.77  916.46
   2   6  -217970.97  934.00
  -2  -6   218088.56 1026.57
   2   6   0   33.18   17.22
   2   6   0   20.11   15.10
   2   6   0   26.37   30.36
  -2  -6   0   17.48   14.11
  -2  -6   0   12.27   12.51
  -2  -6   0   48.24   39.27
   2   6   1 1148.38   44.84
   2   6   1 1183.76   71.60
  -2  -6  -1 1120.95   69.86
  -2  -6  -1 1163.74   42.81
  -2  -6  -1 1285.62   77.71
  -2  -6  -1 1174.17   41.69
   2   6   2   78.13   35.49
   2   6   2  134.57   18.24
  -2  -6  -2  141.24   17.11
  -2  -6  -2  107.02   50.24
  -2  -6  -2  124.94   17.37
  -2  -6  -2  131.71   35.32
   2   6   3   26.13   16.93
   2   6   3   12.10   29.33
  -2  -6  -3   -4.42   32.91
  -2  -6  -3   24.37   17.14
  -2  -6  -3   19.99   14.09
  -2  -6  -3  -19.66   33.84
   2   6   4  184.31   54.78
   2   6   4  257.52   31.97
  -2  -6  -4  216.62   51.37
  -2  -6  -4  190.25   21.68
  -2  -6  -4  238.07   29.32
  -2  -6  -4  206.93   51.03
   2   6   5 8804.25  472.88
   2   6   5 9559.03  418.23
  -2  -6  -5 9810.85  551.55
  -2  -6  -5 9528.31  427.42
  -2  -6  -5 9341.19  389.49
  -2  -6  -5 9461.37  524.15
   2   6   6   21.51   39.76
  -2  -6  -6    5.76   20.96
  -2  -6  -6    4.83   26.02
  -2  -6  -6    1.79   41.48
   2   6   7  345.66   55.19
  -2  -6  -7  425.26   30.80
  -2  -6  -7  374.89   70.38
   2   6   8   -2.77   47.72
  -2  -6  -8   27.70   48.17
  -2  -6  -8   21.27   20.73
   2   6   9  131.12   48.25
  -2  -6  -9  105.81   26.52
  -2  -6  -9   74.70   71.38
   2   6  10  261.01   90.29
  -2  -6 -10  408.40   51.69
  -2  -6 -10  349.21  100.44
   2   7 -16  441.78   73.93
  -2  -7  16  449.86  102.49
   2   7 -15  434.12   66.02
   2   7 -15  372.07   83.77
  -2  -7  15  361.24   85.06
   2   7 -14   89.82   40.70
   2   7 -14   78.24   54.30
  -2  -7  14   54.60   52.08
   2   7 -13 1066.20   75.79
   2   7 -13 1229.50   99.22
  -2  -7  13  934.26   98.41
   2   7 -12  667.12   46.20
   2   7 -12  680.39   57.62
   2   7 -12  637.41   80.49
  -2  -7  12  528.70   34.64
  -2  -7  12  614.23   72.52
   2   7 -11   76.51   23.36
   2   7 -11   26.49   28.18
   2   7 -11   39.75   41.54
  -2  -7  11   26.54   35.95
  -2  -7  11   26.33   18.41
   2   7 -10  469.14   39.01
   2   7 -10  555.00   43.48
   2   7 -10  531.08   64.28
  -2  -7  10  651.25   57.05
  -2  -7  10  551.76   32.66
   2   7  -9  231.30   28.89
   2   7  -9  234.63   50.72
   2   7  -9  347.41   41.23
  -2  -7   9  222.58   24.35
  -2  -7   9  272.08   38.65
  -2  -7   9  217.56   35.98
   2   7  -8 8963.94  397.43
   2   7  -8 9280.45  477.49
   2   7  -8 9323.63  473.21
  -2  -7   8 9081.81  428.32
  -2  -7   8 9210.05  408.41
  -2  -7   8 8873.61  413.50
   2   7  -7 4493.46  208.08
   2   7  -7 4422.03  227.42
   2   7  -7 4554.35  189.60
  -2  -7   7 4632.55  208.74
  -2  -7   7 4690.09  191.10
  -2  -7   7 4260.88  183.08
   2   7  -6   33.38   21.96
   2   7  -6   63.76   24.60
   2   7  -6   21.22   41.21
  -2  -7   6   23.69   28.91
  -2  -7   6   19.00   16.66
  -2  -7   6   14.72   18.05
   2   7  -5  456.22   26.15
   2   7  -5  518.54   48.22
   2   7  -5  569.50   59.86
  -2  -7   5  458.60   28.69
  -2  -7   5  471.93   26.83
  -2  -7   5  539.37   54.61
   2   7  -4   71.58   43.55
   2   7  -4  116.46   22.83
   2   7  -4   83.61   21.07
  -2  -7   4  122.39   19.83
  -2  -7   4   66.53   23.62
  -2  -7   4   33.60   40.05
   2   7  -3 2656.15  102.55
   2   7  -3 2510.88  129.53
   2   7  -3 2743.01   87.44
  -2  -7   3 2785.76   96.12
  -2  -7   3 2873.00  131.24
  -2  -7   3 2684.06   82.32
   2   7  -212286.04  562.31
   2   7  -211895.66  531.35
   2   7  -211918.83  613.04
  -2  -7   212096.59  517.13
  -2  -7   211454.10  504.90
  -2  -7   211897.38  620.33
   2   7  -1   38.81   29.53
   2   7  -1   30.76   21.05
   2   7  -1   14.72   18.44
  -2  -7   1  -15.15   19.48
  -2  -7   1   -6.31   13.90
  -2  -7   1    8.37   37.74
   2   7   0 1364.06  107.76
   2   7   0 1473.14   56.91
  -2  -7   0 1403.69   62.45
  -2  -7   0 1385.99   52.11
  -2  -7   0 1557.33   92.20
  -2  -7   0 1476.45   86.23
   2   7   1  799.02   39.10
   2   7   1  709.24   62.47
  -2  -7  -1  746.76   36.11
  -2  -7  -1  715.23   64.39
  -2  -7  -1  793.63   65.48
  -2  -7  -1  661.06   33.72
   2   7   2    4.83   17.62
   2   7   2   75.11   39.03
  -2  -7  -2   20.69   17.64
  -2  -7  -2   23.24   32.43
  -2  -7  -2  -64.47   35.33
  -2  -7  -2   21.36   15.43
   2   7   3 2177.18   83.00
   2   7   3 1847.72  114.14
  -2  -7  -3 2252.57  132.74
  -2  -7  -3 2293.83   86.52
  -2  -7  -3 2241.11   82.12
  -2  -7  -3 2271.99  146.09
   2   7   4   35.09   33.03
  -2  -7  -4   11.86   43.49
  -2  -7  -4    9.76   18.12
  -2  -7  -4   23.73   22.27
   2   7   5  845.01   66.67
  -2  -7  -5  612.28   48.83
  -2  -7  -5  737.36   88.28
  -2  -7  -5  540.45   37.25
   2   7   6  897.78   83.45
  -2  -7  -6  843.18   73.25
  -2  -7  -6  938.85   47.63
  -2  -7  -6 1135.31  107.42
   2   7   7  155.54   67.75
  -2  -7  -7  198.18   26.46
  -2  -7  -7  249.91   71.23
   2   7   8    6.60   42.98
  -2  -7  -8   21.24   21.97
  -2  -7  -8   26.48   61.76
   2   7   9  114.05   72.75
  -2  -7  -9  117.58   30.11
  -2  -7  -9  101.84   77.07
   2   7  10  270.42   98.40
  -2  -7 -10  305.50   53.02
  -2  -7 -10  403.91  106.75
  -2  -8  16   73.05   72.14
   2   8 -15   81.21   55.48
   2   8 -15   24.99   72.66
  -2  -8  15   21.53   63.47
   2   8 -14  954.31   77.93
   2   8 -14  694.54  104.03
  -2  -8  14  935.22  106.24
   2   8 -13  572.95   75.25
   2   8 -13  575.04   84.72
  -2  -8  13  523.47   75.39
   2   8 -12  131.53   31.62
   2   8 -12  142.13   55.34
   2   8 -12  139.38   46.54
  -2  -8  12   80.44   29.53
  -2  -8  12  176.96   45.83
   2   8 -11   34.66   23.83
   2   8 -11   79.23   38.08
   2   8 -11   37.82   45.41
  -2  -8  11   62.35   37.08
  -2  -8  11   41.92   20.97
   2   8 -10  310.90   60.02
   2   8 -10  328.67   35.05
   2   8 -10  359.58   34.75
  -2  -8  10  245.02   23.07
  -2  -8  10  286.88   48.64
   2   8  -9 1507.76   71.64
   2   8  -9 1493.34  109.48
  -2  -8   9 1411.73   85.60
  -2  -8   9 1487.42   81.55
  -2  -8   9 1513.29   72.19
   2   8  -8  402.69   61.66
   2   8  -8  352.06   33.30
   2   8  -8  382.83   58.85
  -2  -8   8  366.05   36.20
  -2  -8   8  243.65   47.78
  -2  -8   8  376.23   33.63
   2   8  -714589.69  738.58
   2   8  -715552.38  921.77
   2   8  -715136.88  820.68
  -2  -8   715262.76  849.53
  -2  -8   714616.59  744.48
  -2  -8   713686.02  732.15
   2   8  -6  543.13   70.76
   2   8  -6  502.63   34.68
   2   8  -6  715.90   60.90
  -2  -8   6  575.56   45.42
  -2  -8   6  579.11   62.28
  -2  -8   6  431.30   41.99
   2   8  -5 2619.87  111.12
   2   8  -5 2371.05  126.84
   2   8  -5 2510.17   89.38
  -2  -8   5 2435.62   84.44
  -2  -8   5 2499.98  118.32
  -2  -8   5 2234.40   89.18
   2   8  -4  307.97   46.26
   2   8  -4  300.27   29.77
   2   8  -4  323.98   35.00
  -2  -8   4  282.61   43.86
  -2  -8   4  323.08   23.52
  -2  -8   4  352.58   28.05
   2   8  -3  137.91   26.15
   2   8  -3  191.67   28.20
   2   8  -3  117.33   51.90
  -2  -8   3  175.42   21.16
  -2  -8   3  198.48   22.93
  -2  -8   3  188.27   40.62
   2   8  -2 2077.40   87.41
   2   8  -2 1900.69  117.79
   2   8  -2 2143.56   91.84
  -2  -8   2 2154.91   77.33
  -2  -8   2 2079.11   77.80
  -2  -8   2 2283.35  119.60
   2   8  -1 7323.29  364.36
   2   8  -1 7410.11  309.83
   2   8  -1 7283.81  306.66
  -2  -8   1 7189.91  282.66
  -2  -8   1 7122.01  407.19
  -2  -8   1 7271.03  288.98
   2   8   0  403.96   54.30
   2   8   0  330.28   33.63
  -2  -8   0  366.70   51.35
  -2  -8   0  440.59   29.34
  -2  -8   0  300.26   58.43
  -2  -8   0  425.62   28.66
   2   8   1 1892.11  136.76
   2   8   1 1792.27   78.75
  -2  -8  -1 1963.73  116.90
  -2  -8  -1 1765.65   69.91
  -2  -8  -1 1740.13   67.96
  -2  -8  -1 1750.46  156.83
   2   8   2    0.08   32.14
   2   8   2    5.70   21.68
  -2  -8  -2   17.55   37.73
  -2  -8  -2   15.15   18.36
  -2  -8  -2   -4.25   16.49
  -2  -8  -2   26.28   42.44
   2   8   3 1481.04  100.73
  -2  -8  -3 1494.86  118.47
  -2  -8  -3 1589.76   75.08
  -2  -8  -3 1597.82   64.98
   2   8   4 2160.22  134.19
  -2  -8  -4 2485.20  111.25
  -2  -8  -4 2030.14  166.14
  -2  -8  -4 2286.90  106.40
   2   8   5   27.36   37.50
  -2  -8  -5   10.92   49.99
  -2  -8  -5   22.79   20.01
  -2  -8  -5   12.33   29.35
   2   8   6  -18.60   41.19
  -2  -8  -6  -10.07   52.13
  -2  -8  -6   19.95   19.51
   2   8   7   52.57   40.26
  -2  -8  -7  -13.20   20.07
  -2  -8  -7    3.62   57.69
   2   8   8  196.67   55.04
  -2  -8  -8   50.05   88.42
  -2  -8  -8  107.25   30.05
   2   8   9  198.84   70.66
  -2  -8  -9  182.45   39.64
  -2  -8  -9  272.15  109.28
  -2  -9  16   63.35   72.12
   2   9 -15   24.28   39.92
  -2  -9  15   17.68   59.86
   2   9 -14 1886.33  161.73
   2   9 -14 1882.96  118.79
  -2  -9  14 2004.40  151.87
   2   9 -13   -7.15   37.77
   2   9 -13  146.72   37.52
   2   9 -13   93.40   55.95
  -2  -9  13   96.31   48.68
   2   9 -12   18.59   34.09
   2   9 -12  -29.47   25.50
   2   9 -12   15.05   46.89
  -2  -9  12   -7.83   35.89
   2   9 -11   -0.11   25.57
   2   9 -11   -2.08   44.91
   2   9 -11   31.84   25.84
  -2  -9  11   43.40   27.54
   2   9 -10    7.43   40.38
   2   9 -10    9.31   25.48
  -2  -9  10   -5.21   23.87
  -2  -9  10   45.10   36.98
   2   9  -9 3513.17  225.62
   2   9  -9 3735.84  217.25
   2   9  -9 3454.79  144.05
  -2  -9   9 3355.32  173.29
  -2  -9   9 3319.66  144.36
   2   9  -8 2324.68  155.71
   2   9  -8 1964.83  124.63
   2   9  -8 2193.25   94.04
  -2  -9   8 2067.83  108.29
  -2  -9   8 1994.81  125.72
  -2  -9   8 2266.48  104.42
   2   9  -7  356.65   50.28
   2   9  -7  305.68   31.83
   2   9  -7  347.01   68.46
  -2  -9   7  342.14   43.03
  -2  -9   7  270.53   43.84
  -2  -9   7  419.58   56.19
   2   9  -6  -14.78   41.48
   2   9  -6   30.29   30.92
   2   9  -6   60.05   25.45
  -2  -9   6   24.15   19.64
  -2  -9   6  -34.38   27.82
  -2  -9   6   10.53   41.51
   2   9  -5   85.89   27.55
   2   9  -5   76.61   31.35
   2   9  -5   91.52   37.66
  -2  -9   5  104.75   24.47
  -2  -9   5   86.17   23.44
  -2  -9   5   62.50   39.89
   2   9  -4  701.13   63.59
   2   9  -4  601.69   50.55
   2   9  -4  569.02   35.50
  -2  -9   4  525.10   78.91
  -2  -9   4  550.46   38.47
  -2  -9   4  654.54   40.06
   2   9  -3 5650.20  256.97
   2   9  -3 5662.49  239.25
   2   9  -3 5733.55  322.23
  -2  -9   3 5812.03  228.69
  -2  -9   3 5597.42  295.64
  -2  -9   3 5693.01  225.35
   2   9  -2  482.23   57.08
   2   9  -2  416.38   58.55
   2   9  -2  433.41   45.10
  -2  -9   2  483.62   34.57
  -2  -9   2  380.00   68.45
  -2  -9   2  483.90   34.99
   2   9  -1  382.01   55.49
   2   9  -1  307.71   33.55
   2   9  -1  345.67   38.69
  -2  -9   1  299.24   81.63
  -2  -9   1  379.35   38.90
  -2  -9   1  326.46   32.57
   2   9   0   82.84   44.69
  -2  -9   0   76.05   21.79
  -2  -9   0  129.61   24.44
  -2  -9   0   60.87   44.78
  -2  -9   0   22.63   47.13
   2   9   1   35.86   45.80
  -2  -9  -1   39.61   40.83
  -2  -9  -1  -10.54   20.04
  -2  -9  -1   20.30   17.64
   2   9   2  935.93   84.40
  -2  -9  -2 1127.53  107.31
  -2  -9  -2 1144.98   60.92
  -2  -9  -2 1087.67   53.82
   2   9   3  447.15   82.00
  -2  -9  -3  419.70   85.46
  -2  -9  -3  475.93   47.21
  -2  -9  -3  481.82   35.75
   2   9   4 3328.46  203.72
  -2  -9  -4 3426.12  240.98
  -2  -9  -4 3607.08  170.11
  -2  -9  -4 3227.86  134.90
   2   9   5   -8.01   40.94
  -2  -9  -5   22.66   26.45
  -2  -9  -5  -29.43   56.12
   2   9   6  115.34   54.80
  -2  -9  -6  132.13   78.93
  -2  -9  -6  139.78   30.33
   2   9   7   68.37   48.12
  -2  -9  -7   -6.19   24.98
  -2  -9  -7   14.95   70.95
   2   9   8   63.66   68.35
  -2  -9  -8    2.23   29.54
  -2  -9  -8   49.39   77.72
   2  10 -15   24.14   39.86
  -2 -10  15   29.52   61.52
   2  10 -14    6.94   34.76
   2  10 -14  -63.41   50.44
  -2 -10  14   34.90   53.19
   2  10 -13   40.33   42.57
   2  10 -13  184.45   60.75
  -2 -10  13  151.00   41.06
   2  10 -12    2.81   26.99
   2  10 -12  -10.50   39.12
   2  10 -12   24.04   49.03
  -2 -10  12   27.90   39.71
   2  10 -11  163.51   59.67
   2  10 -11   89.13   45.38
   2  10 -11   77.18   35.29
  -2 -10  11  123.20   42.84
   2  10 -10 2322.02  113.99
   2  10 -10 2618.26  172.42
  -2 -10  10 2512.34  150.37
  -2 -10  10 2195.80  115.96
   2  10  -9  606.53   89.27
   2  10  -9  559.11   45.49
  -2 -10   9  540.39   73.25
  -2 -10   9  610.59   48.65
   2  10  -8 1673.02   90.82
   2  10  -8 1589.93  134.81
  -2 -10   8 1448.80  116.13
  -2 -10   8 1504.95   81.19
   2  10  -7  543.39   84.63
   2  10  -7  587.41   53.96
   2  10  -7  832.19   84.54
  -2 -10   7  488.10   43.98
  -2 -10   7  533.33   42.02
  -2 -10   7  293.03   77.68
   2  10  -6    9.76   32.44
   2  10  -6   17.23   35.43
   2  10  -6   -9.28   19.80
  -2 -10   6    4.07   20.35
  -2 -10   6   17.20   45.12
  -2 -10   6   -2.56   19.95
   2  10  -5  220.33   36.70
   2  10  -5  229.68   52.55
   2  10  -5  254.07   44.61
  -2 -10   5  215.20   40.56
  -2 -10   5  195.89   70.02
  -2 -10   5  217.94   38.42
   2  10  -4   17.75   51.85
   2  10  -4   26.14   22.89
   2  10  -4   44.40   30.65
  -2 -10   4   67.71   26.86
  -2 -10   4   26.77   21.69
  -2 -10   4   59.23   43.28
   2  10  -3 4366.45  193.32
   2  10  -3 4416.40  274.38
  -2 -10   3 4602.27  186.01
  -2 -10   3 4058.06  167.67
  -2 -10   3 4479.10  303.53
   2  10  -2 1253.45   99.28
   2  10  -2 1281.62   81.02
  -2 -10   2 1305.27   64.54
  -2 -10   2 1304.57   67.38
   2  10  -1  147.39   53.93
  -2 -10   1  360.13   38.35
  -2 -10   1  244.40   33.51
   2  10   0  117.94   46.02
  -2 -10   0   99.19   22.59
  -2 -10   0  145.56   53.42
  -2 -10   0   67.48   27.78
   2  10   1   73.56   45.19
  -2 -10  -1   62.35   29.93
  -2 -10  -1  121.07   55.68
  -2 -10  -1   75.70   23.13
   2  10   2 1254.72   99.39
  -2 -10  -2 1205.22  125.36
  -2 -10  -2 1289.70   64.96
  -2 -10  -2 1191.88   80.10
   2  10   3 1486.15  114.81
  -2 -10  -3 1733.44  155.75
  -2 -10  -3 1596.98   92.59
   2  10   4   32.09   44.53
  -2 -10  -4   57.45   59.13
  -2 -10  -4   -3.00   21.72
   2  10   5   30.14   52.11
  -2 -10  -5   20.53   70.47
  -2 -10  -5   40.46   33.51
   2  10   6  205.67   71.95
  -2 -10  -6   18.65   38.74
  -2 -10  -6   -9.92   81.00
  -2 -11  15  296.20   93.66
   2  11 -14   12.41   52.07
  -2 -11  14   48.22   59.39
   2  11 -13   37.81   56.60
   2  11 -13   -3.73   45.79
  -2 -11  13   43.69   48.48
   2  11 -12   -1.26   30.65
   2  11 -12    3.16   49.55
  -2 -11  12   15.96   40.12
   2  11 -11   17.98   28.82
   2  11 -11    1.94   54.11
  -2 -11  11   24.06   30.10
  -2 -11  11   24.47   46.32
   2  11 -10 1831.55  160.71
   2  11 -10 1626.19   92.25
  -2 -11  10 1793.18  141.19
  -2 -11  10 1676.16  113.27
   2  11  -9 1158.10   71.76
   2  11  -9 1254.50  126.55
  -2 -11   9 1177.49  114.94
  -2 -11   9 1110.96   87.97
   2  11  -8  584.60   96.36
   2  11  -8  647.16   62.27
  -2 -11   8  558.63   47.32
  -2 -11   8  572.08   88.54
   2  11  -7   12.08   23.86
   2  11  -7   16.40   48.87
  -2 -11   7   13.14   24.50
  -2 -11   7  -21.99   49.83
   2  11  -6  106.22   63.34
   2  11  -6  117.42   27.20
  -2 -11   6  107.08   37.90
  -2 -11   6   82.45   68.55
   2  11  -5  578.82   71.79
   2  11  -5  593.22   56.36
  -2 -11   5  512.92   40.60
  -2 -11   5  528.34  102.11
   2  11  -4 2996.96  158.60
   2  11  -4 2984.65  221.90
  -2 -11   4 3267.83  147.79
  -2 -11   4 3242.39  140.33
   2  11  -3  324.28   65.36
   2  11  -3  431.75   39.97
  -2 -11   3  322.61   45.73
  -2 -11   3  283.60   41.43
   2  11  -2 1746.44  158.85
   2  11  -2 1536.01  102.99
  -2 -11   2 1763.43   91.60
  -2 -11   2 1763.76   79.55
   2  11  -1  118.53   49.62
  -2 -11   1  104.80   25.36
  -2 -11   1   74.92   33.23
  -2 -11   1  103.73   57.15
   2  11   0  103.47   50.98
  -2 -11   0  109.20   59.72
  -2 -11   0   84.16   24.47
   2  11   1  834.61   91.22
  -2 -11  -1  666.88  113.01
  -2 -11  -1  756.06   52.07
   2  11   2  370.77   78.91
  -2 -11  -2  187.38   79.77
  -2 -11  -2  177.03   43.88
   2  11   3  251.88   65.87
  -2 -11  -3  275.02   88.35
  -2 -11  -3  229.73   36.86
   2  11   4  255.55   92.06
  -2 -11  -4  375.89  104.44
  -2 -11  -4  212.87   36.42
   2  11   5   83.11   62.22
  -2 -11  -5  172.64   92.37
  -2 -11  -5   66.02   32.90
   2  12 -14   94.53   44.05
  -2 -12  14  -31.27   64.49
   2  12 -13   31.43   49.64
   2  12 -13   39.69   63.13
  -2 -12  13   41.33   54.08
   2  12 -12  211.57   61.49
   2  12 -12  190.92   77.81
  -2 -12  12  255.84   64.81
   2  12 -11   27.44   42.27
   2  12 -11   29.82   60.77
  -2 -12  11    9.75   34.15
   2  12 -10  178.00   83.39
   2  12 -10  141.92   42.31
  -2 -12  10  269.03   43.11
  -2 -12  10  281.51   75.51
   2  12  -9 2344.34  182.87
   2  12  -9 2184.84  119.97
  -2 -12   9 2225.19  117.97
   2  12  -8   23.56   52.96
   2  12  -8  -12.59   34.51
  -2 -12   8   16.36   28.08
   2  12  -7   21.73   56.31
   2  12  -7   38.23   27.62
  -2 -12   7  -10.21   26.43
   2  12  -6   21.77   60.64
   2  12  -6   22.34   28.35
  -2 -12   6   18.68   27.74
   2  12  -5  110.24   68.44
   2  12  -5  138.35   42.04
  -2 -12   5   99.42   32.62
   2  12  -4 2490.68  144.62
   2  12  -4 2273.72  169.95
  -2 -12   4 2447.61  113.86
   2  12  -3  243.03   66.22
   2  12  -3  363.78   52.43
  -2 -12   3  272.36   34.69
   2  12  -2  -15.60   50.73
  -2 -12   2   84.40   26.04
   2  12  -1   -7.92   49.42
  -2 -12   1    9.35   59.41
  -2 -12   1   47.70   25.93
   2  12   0  -14.82   43.80
  -2 -12   0    8.32   58.24
  -2 -12   0    3.41   22.57
   2  12   1  544.23   85.90
  -2 -12  -1  428.71   46.48
  -2 -12  -1  646.76  108.41
   2  12   2  557.94   87.36
  -2 -12  -2  388.01  119.56
  -2 -12  -2  482.01   60.62
   2  12   3   57.11   60.58
  -2 -12  -3   77.69   91.97
  -2 -12  -3   79.18   41.25
  -2 -12  -4 -127.74  108.98
   2  13 -13  -21.99   50.20
  -2 -13  13  -21.05   59.28
   2  13 -12   43.93   41.98
   2  13 -12   11.13   68.23
  -2 -13  12   48.36   54.46
   2  13 -11 1458.58  101.66
   2  13 -11 1235.10  159.00
  -2 -13  11 1454.27  127.18
   2  13 -10  107.90   72.44
   2  13 -10   65.10   48.23
  -2 -13  10   55.92   47.33
   2  13  -9   60.61   51.97
   2  13  -9  114.55   79.94
  -2 -13   9  185.50   40.45
   2  13  -8  -23.96   29.39
   2  13  -8  106.47   58.20
  -2 -13   8    4.98   28.11
   2  13  -7    2.78   56.59
   2  13  -7   35.98   39.72
  -2 -13   7  -14.56   28.30
   2  13  -6  163.75   57.77
   2  13  -6   95.48   38.75
  -2 -13   6  158.18   36.64
   2  13  -5  832.52   92.20
   2  13  -5  843.48   72.26
  -2 -13   5  718.13   59.75
   2  13  -4 1149.06  127.11
   2  13  -4 1456.23  118.91
  -2 -13   4 1413.57   82.79
   2  13  -3  -25.02   42.71
   2  13  -3  -71.34   62.12
  -2 -13   3   10.45   34.42
   2  13  -2  124.80   53.22
  -2 -13   2  102.36   67.35
  -2 -13   2   17.17   29.33
   2  13  -1   14.75   72.90
  -2 -13   1   55.45   75.61
  -2 -13   1   64.10   28.23
   2  13   0  -13.02   48.13
  -2 -13   0   35.17   75.41
  -2 -13   0    1.08   24.95
   2  13   1  -57.91   69.15
  -2 -13  -1  -35.92   80.97
  -2 -13  -1   25.68   28.34
  -2 -13  -2  716.54  164.44
  -2 -13  -2  738.89   61.17
   2  14 -12  340.98   81.23
  -2 -14  12  265.76   85.88
   2  14 -11  488.27  120.90
   2  14 -11  511.95   71.09
  -2 -14  11  544.28   68.13
   2  14 -10  487.84  120.01
   2  14 -10  612.39   66.75
  -2 -14  10  394.39   87.21
   2  14  -9  -18.93   73.46
   2  14  -9  113.07   51.00
  -2 -14   9   25.64   49.34
   2  14  -8    6.89   74.16
   2  14  -8   96.47   37.57
  -2 -14   8   11.00   36.01
   2  14  -7  -23.84   71.69
   2  14  -7  -25.02   45.53
  -2 -14   7  -17.19   32.55
   2  14  -6   -2.06   46.14
   2  14  -6  -54.48   67.96
  -2 -14   6   -0.11   38.37
   2  14  -5  785.78   71.21
   2  14  -5  734.91  124.97
  -2 -14   5  488.28   58.16
   2  14  -4  165.16   64.15
   2  14  -4  258.32   64.13
  -2 -14   4   86.56   38.28
   2  14  -3  -14.20   58.79
  -2 -14   3   59.92   31.13
   2  14  -2  -21.23   54.73
  -2 -14   2   -7.22   29.32
  -2 -14   2  212.07   79.95
   2  14  -1   24.96   59.27
  -2 -14   1    2.30   28.65
  -2 -14   1 -189.06   83.14
   2  14   0  434.88   96.16
  -2 -14   0  535.90  145.67
   2  15  -9  -51.63   80.79
   2  15  -9   37.52   57.88
  -2 -15   9   58.89   40.33
   2  15  -8 -156.14   74.37
   2  15  -8   79.68   54.25
  -2 -15   8   12.34   47.10
   2  15  -7  358.62   89.83
   2  15  -7  315.01   83.07
  -2 -15   7  277.02   51.57
   2  15  -6   89.33   59.13
   2  15  -6   -4.16   52.72
  -2 -15   6  -16.35   35.57
   2  15  -5  110.37   68.44
   2  15  -5  100.49   69.53
  -2 -15   5   83.96   39.29
   2  15  -4  418.40  116.92
   2  15  -4  281.55   68.56
   3 -15   3  119.45   75.68
   3 -15   3   41.36   56.68
  -3  15  -3   15.27   62.12
   3 -15   4  170.77   48.93
  -3  15  -4  154.52   62.07
  -3  15  -4  246.30   72.78
   3 -15   5  379.14   79.82
  -3  15  -5  383.01   84.80
  -3  15  -5  340.97   92.41
   3 -15   6   -6.38   39.34
  -3  15  -6   -9.29   45.91
  -3  15  -6   33.40   43.33
   3 -14  -1  -34.30   46.31
   3 -14  -1  -71.97   79.21
  -3  14   1  -48.51   54.25
   3 -14   0   40.75   69.75
   3 -14   0   26.27   33.57
  -3  14   0  -62.58   59.90
   3 -14   1   25.40   34.41
   3 -14   1  137.50   67.24
  -3  14  -1    6.68   46.32
   3 -14   2  161.78   67.54
   3 -14   2   30.70   36.97
  -3  14  -2   -2.78   60.85
   3 -14   3  345.03   60.89
  -3  14  -3  631.98   87.57
   3 -14   4  579.41   77.06
  -3  14  -4  267.67   79.36
  -3  14  -4  532.43   92.39
   3 -14   5    8.48   38.03
  -3  14  -5    5.40   46.33
  -3  14  -5   48.11   42.24
   3 -14   6  -16.77   48.58
  -3  14  -6   20.11   37.58
  -3  14  -6   17.14   39.53
   3 -14   7   -2.88   40.65
  -3  14  -7   64.93   33.46
  -3  14  -7   11.51   54.31
   3 -14   8  393.57   67.97
  -3  14  -8  482.27   65.34
   3 -14   9   -7.65   39.84
  -3  14  -9    6.63   38.01
   3 -14  10  929.23  105.94
  -3  14 -10  292.89   76.23
   3 -13  -3  243.29  141.76
   3 -13  -3  329.54   46.64
  -3  13   3  112.50   89.69
   3 -13  -2   57.31   34.69
   3 -13  -2   18.15  103.70
  -3  13   2  121.32   52.71
   3 -13  -1   35.71   74.11
   3 -13  -1   88.71   46.43
  -3  13   1   99.31   64.61
   3 -13   0    6.34   38.70
   3 -13   0  -16.44   62.52
  -3  13   0   32.39   41.79
   3 -13   1   22.73   70.67
   3 -13   1  -19.33   34.71
  -3  13  -1   16.18   36.88
   3 -13   2   19.71   40.86
   3 -13   2   49.00   57.95
  -3  13  -2   14.05   47.67
   3 -13   3 2145.87  121.78
  -3  13  -3 2286.58  136.98
  -3  13  -3 2116.06  151.93
   3 -13   4   94.87   38.55
  -3  13  -4  113.68   54.83
  -3  13  -4  114.53   48.52
   3 -13   5    2.60   43.10
   3 -13   5    7.29   72.33
  -3  13  -5   11.15   32.88
  -3  13  -5   13.22   36.26
   3 -13   6   19.08   44.32
   3 -13   6  -11.68   65.82
  -3  13  -6    5.14   36.05
  -3  13  -6   40.37   33.77
   3 -13   7   17.77   35.25
  -3  13  -7  -14.54   41.73
  -3  13  -7   -7.92   26.28
   3 -13   8 1341.77  100.07
  -3  13  -8 1353.15   90.77
  -3  13  -8 1101.07   61.11
   3 -13   9  834.66   83.75
  -3  13  -9  654.62   89.66
   3 -13  10   -7.16   45.45
  -3  13 -10   -9.64   36.17
   3 -13  11   29.00   44.55
  -3  13 -11  -18.25   35.22
   3 -13  12   18.14   71.46
   3 -12  -5  142.29   47.56
   3 -12  -5  109.17  123.51
   3 -12  -4  272.71  137.50
   3 -12  -4  339.05   55.75
  -3  12   4  319.69   90.80
   3 -12  -3  184.11   44.44
   3 -12  -3  236.56   88.14
  -3  12   3  136.29   73.61
   3 -12  -2  128.54  102.38
   3 -12  -2  177.46   45.38
  -3  12   2  160.33   55.73
   3 -12  -1  -14.67   32.90
   3 -12  -1  -11.36   76.34
  -3  12   1   -4.13   37.25
   3 -12   0   -0.45   82.54
   3 -12   0  130.63   34.15
  -3  12   0  198.30   46.53
   3 -12   1 1069.99   69.39
   3 -12   1 1026.46  113.10
  -3  12  -1  944.00  102.55
   3 -12   2  136.43   37.55
  -3  12  -2  238.07   53.40
  -3  12  -2  182.02   44.23
   3 -12   3   53.42   30.58
  -3  12  -3   99.63   46.94
  -3  12  -3   35.13   42.85
   3 -12   4  585.58   61.78
   3 -12   4  551.65  108.49
  -3  12  -4  856.26   69.03
  -3  12  -4  579.73   56.57
   3 -12   5  -32.12   57.23
   3 -12   5    8.27   30.39
  -3  12  -5    3.85   31.57
  -3  12  -5   20.92   28.00
   3 -12   6   72.89   36.73
   3 -12   6   52.23   53.13
  -3  12  -6   62.53   32.65
  -3  12  -6   80.91   31.87
   3 -12   7  821.52   75.38
   3 -12   7  888.00   87.00
  -3  12  -7  763.28   60.20
  -3  12  -7  948.60   69.01
   3 -12   8  529.29   61.16
  -3  12  -8  605.10   44.82
  -3  12  -8  582.91   58.32
   3 -12   9 1301.58   98.93
  -3  12  -9 1126.74   53.41
  -3  12  -9 1203.24   85.91
   3 -12  10   53.84   46.53
  -3  12 -10   86.44   38.29
   3 -12  11  -32.03   45.38
  -3  12 -11    3.53   33.56
   3 -12  12   16.21   53.69
  -3  12 -12  -87.06   40.50
   3 -12  13   15.97   65.34
  -3  12 -13  120.49   60.00
   3 -11  -6   -5.04   67.83
   3 -11  -6   -6.57   25.27
  -3  11   6   -1.99   58.77
   3 -11  -5   56.41   71.84
   3 -11  -5  -65.23   35.20
  -3  11   5  -38.96   48.35
   3 -11  -4    8.17   82.22
   3 -11  -4   27.16   32.73
  -3  11   4   -4.71   43.10
   3 -11  -3 1344.85  152.86
   3 -11  -3  945.06   69.08
  -3  11   3  813.38   88.62
   3 -11  -2   -2.58   66.46
   3 -11  -2    7.50   22.56
  -3  11   2   11.67   36.67
   3 -11  -1  226.75   68.91
   3 -11  -1  185.71   40.01
  -3  11   1   91.92   56.64
   3 -11   0    8.49   23.71
   3 -11   0    2.16   46.36
  -3  11   0   -1.11   31.42
   3 -11   1  484.16   79.06
   3 -11   1  506.17   49.26
  -3  11  -1  616.29   68.97
   3 -11   2 3779.15  171.35
   3 -11   2 3643.12  219.20
  -3  11  -2 3356.91  171.04
  -3  11  -2 3697.58  195.44
   3 -11   3   66.73   33.43
   3 -11   3   48.74   63.04
  -3  11  -3  103.38   39.65
  -3  11  -3   58.80   32.01
   3 -11   4    7.23   27.16
   3 -11   4  -15.62   47.62
  -3  11  -4  -13.03   24.62
  -3  11  -4   12.50   27.81
   3 -11   5   -6.98   29.53
   3 -11   5   73.66   42.32
  -3  11  -5   -3.11   33.74
  -3  11  -5   17.45   26.17
   3 -11   6  197.28   36.94
   3 -11   6  159.46   46.42
  -3  11  -6   39.32   26.65
  -3  11  -6  130.91   32.90
   3 -11   7 1685.86  103.78
   3 -11   7 1778.35  112.92
  -3  11  -7 1671.55   76.61
  -3  11  -7 1831.31   93.93
   3 -11   8 2540.37  146.46
   3 -11   8 2481.61  118.17
  -3  11  -8 2325.76   88.85
  -3  11  -8 2554.64  141.91
   3 -11   9  784.12   52.31
   3 -11   9  925.30   78.35
  -3  11  -9  858.86   65.90
  -3  11  -9  855.45   40.26
   3 -11  10   13.66   41.10
  -3  11 -10   13.96   40.55
   3 -11  11  -12.79   49.89
  -3  11 -11  115.13   46.59
   3 -11  12  336.94   71.56
  -3  11 -12  306.24   68.48
   3 -11  13   10.93   57.06
  -3  11 -13   77.23   40.53
   3 -10  -7   82.58   94.20
   3 -10  -7   15.43   24.59
  -3  10   7   36.04   45.54
   3 -10  -6  -11.60   61.20
   3 -10  -6    3.94   29.27
  -3  10   6   13.00   40.07
   3 -10  -5 1639.67  166.67
   3 -10  -5 1636.72   92.65
  -3  10   5 1578.67  117.70
   3 -10  -4    8.34   50.72
   3 -10  -4   -5.61   27.91
  -3  10   4   -0.76   37.05
   3 -10  -3  130.04   75.38
   3 -10  -3   57.70   33.02
  -3  10   3   90.96   40.98
   3 -10  -2  246.86   32.98
   3 -10  -2  264.27   68.32
  -3  10   2  286.88   49.06
   3 -10  -1   29.42   45.69
   3 -10  -1   66.82   30.37
  -3  10   1   20.54   31.67
   3 -10   0   -4.32   39.70
   3 -10   0   18.93   21.48
   3 -10   0   47.45   45.06
  -3  10   0   23.99   37.51
   3 -10   1 1794.30  150.65
   3 -10   1 1527.25   73.82
  -3  10  -1 1499.90  103.26
  -3  10  -1 1456.05   94.17
   3 -10   2 3445.74  156.10
   3 -10   2 3706.69  221.06
  -3  10  -2 3662.39  184.37
  -3  10  -2 3686.78  173.88
   3 -10   3    4.40   41.51
   3 -10   3  -14.56   23.34
  -3  10  -3   19.63   22.98
  -3  10  -3    9.01   28.13
   3 -10   4  274.37   35.35
   3 -10   4  237.56   54.70
  -3  10  -4  194.39   33.13
  -3  10  -4  160.46   33.34
   3 -10   5   -2.27   25.68
   3 -10   5  -14.37   33.48
  -3  10  -5    9.85   22.72
  -3  10  -5   -5.66   21.11
   3 -10   6  130.49   46.41
   3 -10   6  114.72   37.09
  -3  10  -6  123.20   27.52
  -3  10  -6  132.75   30.32
   3 -10   7  180.49   40.99
   3 -10   7  304.56   45.91
  -3  10  -7  263.70   27.08
  -3  10  -7  276.21   35.37
   3 -10   8 9926.38  424.58
   3 -10   8 9766.35  556.55
  -3  10  -8 9559.97  463.70
  -3  10  -8 9293.48  381.55
   3 -10   9  129.67   42.61
  -3  10  -9   81.49   13.05
  -3  10  -9   -1.60   13.53
  -3  10  -9  173.60   31.48
   3 -10  10   73.72   43.14
  -3  10 -10   52.60   29.14
   3 -10  11    3.18   50.12
  -3  10 -11   95.24   44.74
   3 -10  12  113.05   76.27
  -3  10 -12   87.70   40.16
   3 -10  13 1793.27  155.97
  -3  10 -13 1712.01  113.78
   3 -10  14  333.05  101.83
  -3  10 -14  190.08   73.82
   3  -9  -9   59.81   91.07
   3  -9  -9  156.41   40.79
   3  -9  -8    4.38   67.99
   3  -9  -8  -60.60   32.47
  -3   9   8  -53.93   59.14
   3  -9  -7  157.86   60.07
   3  -9  -7   -0.51   27.08
  -3   9   7   25.23   41.97
   3  -9  -6   25.23   67.99
   3  -9  -6  130.60   31.79
  -3   9   6  130.03   45.57
   3  -9  -5 1690.94   70.58
   3  -9  -5 1556.35  151.63
  -3   9   5 1393.33  108.38
   3  -9  -4 1354.23   69.76
   3  -9  -4 1325.35  126.46
  -3   9   4 1223.37   91.41
   3  -9  -3  123.76   56.89
   3  -9  -3  138.13   22.33
  -3   9   3  174.56   50.88
  -3   9   3   86.38   45.06
   3  -9  -2  500.34   70.02
   3  -9  -2  533.17   42.01
  -3   9   2  544.43   61.97
  -3   9   2  389.21   51.85
   3  -9  -1   26.11   46.41
   3  -9  -1    7.61   35.76
   3  -9  -1  -21.20   18.58
  -3   9   1   22.48   27.86
  -3   9   1  -10.67   32.05
   3  -9   0 2031.52  130.11
   3  -9   0 2300.96   95.34
   3  -9   0 2217.33  136.05
   3  -9   0 2370.52  111.20
  -3   9   0 2293.73  113.67
  -3   9   0 2282.21  110.72
   3  -9   1 5364.47  262.01
   3  -9   1 5420.55  219.06
   3  -9   1 5427.39  223.47
  -3   9  -1 5437.27  238.96
  -3   9  -1 5557.39  257.07
  -3   9  -1 5192.70  247.12
   3  -9   2  942.78   84.68
   3  -9   2  848.85   55.51
   3  -9   2  987.21   69.63
  -3   9  -2  970.87   57.54
  -3   9  -2  847.51   60.09
  -3   9  -2 1036.49   87.41
   3  -9   3 1051.78   81.43
   3  -9   3 1001.64   53.15
   3  -9   3  943.96   57.92
  -3   9  -3 1143.14   60.18
  -3   9  -3  958.27   68.92
  -3   9  -3  923.62   55.04
   3  -9   4  528.68   54.25
   3  -9   4  607.74   36.56
   3  -9   4  538.68   46.36
  -3   9  -4  593.45   42.34
  -3   9  -4  727.93   64.76
  -3   9  -4  630.63   40.34
   3  -9   5   32.35   38.63
   3  -9   5   68.07   32.48
   3  -9   5   69.91   30.47
  -3   9  -5   83.11   25.62
  -3   9  -5  112.50   32.20
  -3   9  -5   82.49   52.46
   3  -9   6 6893.20  291.65
   3  -9   6 6280.46  299.36
   3  -9   6 6670.50  296.26
  -3   9  -6 6513.63  248.81
  -3   9  -6 6694.20  352.08
  -3   9  -6 6319.92  272.27
   3  -9   7   37.44   31.96
   3  -9   7   23.90   24.85
  -3   9  -7    6.92   23.57
  -3   9  -7   22.71   14.04
   3  -9   8  389.62   24.05
   3  -9   8  390.89   56.52
  -3   9  -8  440.58   21.30
  -3   9  -8  409.20   39.17
   3  -9   9 2164.21  138.75
  -3   9  -9 2239.47  105.71
   3  -9  10  312.64   77.62
  -3   9 -10  319.79   41.20
   3  -9  11   82.23   49.52
  -3   9 -11  100.67   44.65
   3  -9  12 1004.84  138.37
  -3   9 -12  925.01   73.09
   3  -9  13 1704.55  156.16
  -3   9 -13 1771.24  109.14
   3  -9  14  138.67   64.44
  -3   9 -14   37.81   44.47
   3  -8 -10  -64.51   70.42
   3  -8 -10   -3.06   31.94
   3  -8  -9   33.30   31.03
   3  -8  -9  237.97   91.96
  -3   8   9   35.62   58.32
   3  -8  -8   19.41   26.87
   3  -8  -8   73.00   61.18
  -3   8   8  107.99   40.46
   3  -8  -7  400.15   80.42
   3  -8  -7  373.89   28.20
  -3   8   7  290.20   56.61
   3  -8  -6  -25.30   49.17
   3  -8  -6    7.84   22.46
  -3   8   6  -22.33   32.14
   3  -8  -5  321.44   66.67
   3  -8  -5  243.49   33.83
  -3   8   5  377.43   51.22
  -3   8   5  363.43   51.89
   3  -8  -4  858.81  109.97
   3  -8  -4  783.20   50.49
  -3   8   4  784.15   64.76
  -3   8   4  852.31   62.32
   3  -8  -3  173.61   47.48
   3  -8  -3  200.62   22.76
   3  -8  -3  156.16   50.79
   3  -8  -3  174.04   37.00
  -3   8   3  179.67   32.71
  -3   8   3  121.91   35.45
   3  -8  -2  746.85   74.48
   3  -8  -2  848.57   71.71
   3  -8  -2  689.33   44.03
   3  -8  -2  713.86   46.13
  -3   8   2  662.06   51.25
  -3   8   2  735.40   62.46
   3  -8  -1 1909.51  127.86
   3  -8  -1 1784.89   73.31
   3  -8  -1 1870.46   82.27
   3  -8  -1 2068.84  118.30
  -3   8   1 1800.33   84.33
  -3   8   1 1950.16   90.21
   3  -8   0   45.03   31.90
   3  -8   0   30.72   40.41
   3  -8   0   21.71   19.16
   3  -8   0   32.71   25.80
  -3   8   0   15.37   23.96
  -3   8   0    4.24   28.59
   3  -8   1 3437.13  138.88
   3  -8   1 3693.52  179.01
   3  -8   1 3461.46  127.48
  -3   8  -1 3227.93  155.94
  -3   8  -1 3402.59  146.93
  -3   8  -1 3467.79  148.45
   3  -8   2 5613.23  260.35
   3  -8   2 5692.40  209.07
   3  -8   2 5484.75  224.63
  -3   8  -2 5494.31  225.17
  -3   8  -2 5254.07  235.60
  -3   8  -2 5528.08  220.42
   3  -8   3  473.06   53.75
   3  -8   3  658.87   34.14
   3  -8   3  641.47   44.67
  -3   8  -3  649.42   39.73
  -3   8  -3  678.96   50.47
  -3   8  -3  628.83   51.17
   3  -8   4 1089.96   66.43
   3  -8   4 1237.34   48.27
   3  -8   4 1116.11   65.76
  -3   8  -4 1083.50   70.67
  -3   8  -4 1080.65   52.70
  -3   8  -4 1091.30   54.06
   3  -8   5 1573.21   87.12
   3  -8   5 1743.84   90.83
   3  -8   5 1555.96   65.00
  -3   8  -5 1743.11   73.20
  -3   8  -5 1634.88   63.56
  -3   8  -5 1963.09  125.66
   3  -8   6 6850.33  264.42
   3  -8   6 7110.59  287.55
   3  -8   6 6877.24  323.81
   3  -8   6 6872.86  280.37
  -3   8  -6 7076.12  292.63
  -3   8  -6 6855.66  240.12
   3  -8   7 6243.57  298.29
   3  -8   7 6033.44  225.06
   3  -8   7 6218.47  250.89
   3  -8   7 5482.58  191.23
  -3   8  -7 6044.73  246.96
  -3   8  -7 6121.33  192.71
   3  -8   8    1.56   36.80
   3  -8   8   20.04   24.55
  -3   8  -8   27.20   30.36
   3  -8   9  455.07   53.40
  -3   8  -9  321.52   35.98
   3  -8  10   99.48   56.06
  -3   8 -10   26.73   25.14
   3  -8  11  302.33   85.37
  -3   8 -11  353.37   42.68
   3  -8  12 2862.53  224.15
  -3   8 -12 2641.43  156.13
   3  -8  13  277.48  101.68
  -3   8 -13  344.59   62.80
   3  -8  14  262.39   86.46
  -3   8 -14  317.51   69.53
   3  -8  15   60.24   76.93
  -3   8 -15   77.39   47.19
   3  -7 -10    6.48   23.62
   3  -7 -10  -13.30   60.40
  -3   7  10  -45.64   41.36
   3  -7  -9    9.05   23.16
   3  -7  -9   26.24   56.99
  -3   7   9   48.88   50.25
   3  -7  -8  113.81   25.56
   3  -7  -8  112.81   85.05
  -3   7   8   69.62   43.71
   3  -7  -7  158.69   58.19
   3  -7  -7   60.54   23.71
  -3   7   7   82.89   39.72
  -3   7   7  101.10   37.61
   3  -7  -6 2917.37  247.31
   3  -7  -6 3183.00  126.86
  -3   7   6 3158.00  152.60
  -3   7   6 2991.92  154.48
   3  -7  -5 1102.24  102.68
   3  -7  -5 1265.56   57.31
  -3   7   5 1225.84   91.99
  -3   7   5 1185.22   71.53
   3  -7  -4    0.63   29.88
   3  -7  -4   -4.30   12.60
   3  -7  -4   10.93   35.44
   3  -7  -4   31.63   22.50
  -3   7   4  -15.44   24.86
  -3   7   4   -1.03   18.48
   3  -7  -3 1382.56   85.09
   3  -7  -3 1187.27   52.99
   3  -7  -3 1283.87   56.12
   3  -7  -3 1307.11   92.77
  -3   7   3 1066.12   64.78
  -3   7   3 1209.78   66.86
   3  -7  -2    6.28   30.46
   3  -7  -2   -3.84   14.32
   3  -7  -2   -0.13   16.04
   3  -7  -2    4.12   27.21
  -3   7   2   -0.24   24.46
  -3   7   2  -17.70   21.65
   3  -7  -1 1746.36   67.19
   3  -7  -1 1892.81   88.48
   3  -7  -1 1932.98  123.23
   3  -7  -1 1695.12   65.17
  -3   7   1 1762.38   91.41
  -3   7   1 1843.46   90.95
   3  -7   015473.65  886.09
   3  -7   016120.47  803.96
   3  -7   015903.97  836.64
  -3   7   016119.13  836.92
  -3   7   016802.46  904.13
   3  -7   1 2175.27  109.60
   3  -7   1 2116.01   72.43
   3  -7   1 1887.46   77.47
  -3   7  -1 2001.64   81.86
  -3   7  -1 2052.09   87.78
  -3   7  -1 2123.57   91.79
   3  -7   2 2429.39  103.83
   3  -7   2 2259.73   74.00
   3  -7   2 2052.75   87.03
  -3   7  -2 2186.30  112.65
  -3   7  -2 2105.26   82.36
  -3   7  -2 2120.45   82.61
   3  -7   3 2109.41   92.32
   3  -7   3 2334.50   96.28
   3  -7   3 2125.92   73.04
  -3   7  -3 2296.31   84.22
  -3   7  -3 2165.40   75.96
  -3   7  -3 2385.74  102.25
   3  -7   4 1309.73   49.71
   3  -7   4 1335.82   66.64
   3  -7   4 1323.70   68.85
  -3   7  -4 1372.36   48.19
  -3   7  -4 1355.54   56.48
  -3   7  -4 1356.77   74.20
   3  -7   5 6102.09  229.35
   3  -7   5 6185.48  232.37
   3  -7   5 6312.90  274.68
  -3   7  -5 6084.95  207.75
  -3   7  -5 6115.73  236.28
   3  -7   6 2499.33  121.44
   3  -7   6 2522.13   91.72
   3  -7   6 2302.11   76.08
   3  -7   6 2344.93   76.03
  -3   7  -6 2330.61   61.74
  -3   7  -6 2466.42  106.30
   3  -7   7 7246.12  277.21
   3  -7   7 7659.93  340.45
   3  -7   7 7326.50  360.42
  -3   7  -7 7604.53  327.28
   3  -7   8 1294.25   48.42
   3  -7   8 1363.22   90.44
   3  -7   8 1303.15   66.59
  -3   7  -8 1452.49   63.45
   3  -7   9 2797.80  178.10
   3  -7   9 2649.05  126.72
  -3   7  -9 2710.05  114.07
   3  -7  10 1834.21  125.32
  -3   7 -10 1820.35   86.50
   3  -7  11   75.87   52.07
  -3   7 -11  127.75   33.01
   3  -7  12  823.31  122.25
  -3   7 -12  881.46   78.36
   3  -7  13 2000.68  193.07
  -3   7 -13 1877.70  133.94
   3  -7  14  138.70   98.36
  -3   7 -14  240.29   63.30
   3  -7  15   82.27   70.27
  -3   7 -15   77.03   46.99
   3  -6 -11   56.49   63.58
   3  -6 -11   14.65   26.51
  -3   6  11   -4.80   43.31
   3  -6 -10 -130.76   69.19
   3  -6 -10    7.44   22.31
  -3   6  10   -1.30   37.19
   3  -6  -9    8.95   18.78
   3  -6  -9   -9.77   52.53
  -3   6   9   12.55   34.33
   3  -6  -8   49.00   19.36
   3  -6  -8   18.31   51.45
  -3   6   8    6.80   29.21
  -3   6   8   79.69   35.38
   3  -6  -7 3476.33  256.56
   3  -6  -7 3467.85  124.70
  -3   6   7 3320.95  142.23
  -3   6   7 3191.62  159.87
   3  -6  -6 1415.65  109.40
   3  -6  -6 1274.28   51.47
  -3   6   6 1288.84   77.78
  -3   6   6 1316.78   68.48
   3  -6  -5  438.02   53.15
   3  -6  -5  398.35   39.43
   3  -6  -5  443.87   29.11
   3  -6  -5  464.46   61.62
  -3   6   5  500.50   38.46
  -3   6   5  461.90   44.27
   3  -6  -4  251.72   49.27
   3  -6  -4  213.31   22.05
   3  -6  -4  324.90   29.31
   3  -6  -4  230.63   37.86
  -3   6   4  285.64   34.65
  -3   6   4  304.77   30.78
   3  -6  -3  349.84   25.28
   3  -6  -3  372.27   50.64
   3  -6  -3  403.56   51.57
   3  -6  -3  353.99   30.56
  -3   6   3  330.89   34.88
  -3   6   3  284.18   31.45
   3  -6  -2 1341.65   78.75
   3  -6  -2 1204.74   50.03
   3  -6  -2 1320.72   53.10
   3  -6  -2 1282.06   64.49
  -3   6   2 1159.04   56.75
  -3   6   2 1309.81   61.50
   3  -6  -1  167.08   36.09
   3  -6  -1  268.37   26.83
   3  -6  -1  156.80   35.61
   3  -6  -1  155.78   19.20
  -3   6   1  140.77   31.09
  -3   6   1  202.33   23.25
   3  -6   022176.51 1295.59
   3  -6   020587.63 1140.12
   3  -6   020666.59 1123.67
  -3   6   020661.70 1196.27
  -3   6   021063.80 1195.91
   3  -6   1  501.51   37.86
   3  -6   1  344.47   23.42
   3  -6   1  402.50   29.97
  -3   6  -1  379.99   28.66
  -3   6  -1  431.98   30.57
  -3   6  -1  422.18   32.78
   3  -6   2 1138.44   52.29
   3  -6   2 1225.01   56.19
   3  -6   2 1161.41   40.34
  -3   6  -2 1126.75   45.88
  -3   6  -2 1110.98   45.54
  -3   6  -2 1110.03   53.71
   3  -6   3 1177.11   57.83
   3  -6   3 1197.65   57.57
   3  -6   3 1127.30   39.71
  -3   6  -3 1318.29   63.89
  -3   6  -3 1226.18   46.66
  -3   6  -3 1161.30   45.09
   3  -6   4  163.51   18.35
   3  -6   4  108.08   24.57
   3  -6   4  225.11   29.97
  -3   6  -4  239.61   31.33
  -3   6  -4  197.70   19.80
  -3   6  -4  131.19   13.83
   3  -6   513239.55  587.84
   3  -6   512690.60  652.50
   3  -6   513553.36  634.56
  -3   6  -513319.94  614.35
   3  -6   6 8385.51  316.06
   3  -6   6 8698.14  349.75
   3  -6   6 8071.37  394.35
  -3   6  -6 8516.70  345.98
   3  -6   7   16.72   11.70
   3  -6   7  -11.28   17.84
   3  -6   7   -9.71   38.05
  -3   6  -7   -4.18   16.52
   3  -6   8   24.16   22.37
   3  -6   8    2.34   41.27
   3  -6   8   15.52   12.64
  -3   6  -8   45.41   24.20
   3  -6   9  729.15   40.50
   3  -6   9  793.89   73.09
   3  -6   9  782.83   56.27
  -3   6  -9  700.45   44.07
   3  -6  10  441.61   67.03
  -3   6 -10  435.37   50.19
   3  -6  11 6454.13  346.93
  -3   6 -11 5361.67  245.60
   3  -6  12    2.32   47.07
  -3   6 -12   -9.87   27.97
   3  -6  13   -6.68   52.25
  -3   6 -13  -38.72   42.08
   3  -6  14    8.26  100.31
  -3   6 -14  217.57   45.33
   3  -6  15  147.96  136.28
  -3   6 -15  495.69   65.05
   3  -5 -12  429.56   44.93
   3  -5 -12  494.04  107.83
  -3   5  12  517.39   74.04
   3  -5 -11   45.38   24.53
   3  -5 -11   16.25   60.74
  -3   5  11   85.47   44.27
   3  -5 -10  179.21   27.52
   3  -5 -10   73.81   91.86
  -3   5  10  250.30   59.09
  -3   5  10  238.16   49.48
   3  -5  -9  120.73   76.25
   3  -5  -9  142.09   22.34
  -3   5   9  199.02   40.78
  -3   5   9  140.12   34.88
   3  -5  -8   97.76   18.15
   3  -5  -8  221.26   54.96
  -3   5   8  120.85   26.35
  -3   5   8  105.44   37.74
   3  -5  -7 2439.95   85.26
   3  -5  -7 2233.79  150.15
  -3   5   7 2440.91   95.53
  -3   5   7 2330.40  140.33
   3  -5  -6 3917.05  211.56
   3  -5  -6 3818.64  127.18
   3  -5  -6 3713.38  174.47
  -3   5   6 3869.90  170.76
  -3   5   6 3803.33  231.84
  -3   5   6 3725.61  137.88
   3  -5  -5  285.10   48.41
   3  -5  -5  319.18   20.58
   3  -5  -5  309.90   36.60
  -3   5   5  154.54   44.32
  -3   5   5  287.56   27.88
  -3   5   5  235.87   34.44
   3  -5  -4  557.62   41.37
   3  -5  -4  488.04   52.21
   3  -5  -4  480.58   24.83
  -3   5   4  503.14   47.82
  -3   5   4  523.75   33.34
   3  -5  -3  501.35   31.40
   3  -5  -3  576.80   49.21
   3  -5  -3  513.92   25.71
   3  -5  -3  457.22   37.42
  -3   5   3  495.49   30.27
  -3   5   3  450.31   35.17
   3  -5  -2 6204.66  290.63
   3  -5  -2 6624.36  237.51
   3  -5  -2 6520.50  261.11
   3  -5  -2 6495.64  243.59
  -3   5   2 6772.33  255.10
  -3   5   2 6622.04  257.19
   3  -5  -1 7081.41  317.94
   3  -5  -1 7270.91  262.66
   3  -5  -1 7264.46  269.80
   3  -5  -1 7142.17  284.49
  -3   5   1 7523.01  299.85
  -3   5   1 7432.67  287.08
   3  -5   0  182.75   24.16
   3  -5   0  135.59   16.93
   3  -5   0  184.85   26.90
  -3   5   0  129.23   26.56
  -3   5   0  192.43   20.70
  -3   5   0  149.45   24.23
   3  -5   1 2575.36   91.12
   3  -5   1 2488.98   73.76
   3  -5   1 2427.15   94.98
  -3   5  -1 2454.31   84.62
  -3   5  -1 2822.80   97.34
  -3   5  -1 2596.72   83.42
   3  -5   2 1085.40   47.90
   3  -5   2 1193.60   51.09
   3  -5   2 1127.07   36.04
  -3   5  -2 1212.38   54.09
  -3   5  -2 1131.40   38.43
  -3   5  -2 1114.57   41.63
   3  -5   3 2578.83   78.35
   3  -5   3 2721.80  118.22
   3  -5   3 2570.32   85.90
  -3   5  -3 2528.84   82.10
  -3   5  -3 2691.85  102.61
  -3   5  -3 2612.57   70.92
   3  -5   421817.10 1298.81
  -3   5  -422407.87 1232.31
   3  -5   5  372.61   29.99
   3  -5   5  443.22   42.09
   3  -5   5  349.04   18.71
  -3   5  -5  472.94   26.42
   3  -5   6 4906.95  177.12
   3  -5   6 4934.29  159.45
   3  -5   6 5234.06  230.08
  -3   5  -6 5130.97  179.24
   3  -5   7  630.76   24.51
   3  -5   7  606.40   50.86
   3  -5   7  531.42   43.80
  -3   5  -7  501.73   32.47
   3  -5   8  482.79   24.58
   3  -5   8  678.89   56.51
   3  -5   8  529.94   36.38
  -3   5  -8  575.93   42.02
   3  -5   9  465.09   25.69
   3  -5   9  522.15   60.07
   3  -5   9  485.25   58.56
  -3   5  -9  493.64   36.71
   3  -5  10  519.07   82.95
   3  -5  10  471.30   64.66
  -3   5 -10  471.49   48.53
   3  -5  11 4784.28  276.42
  -3   5 -11 4572.54  200.71
   3  -5  12  672.17   96.65
  -3   5 -12  829.62   75.79
   3  -5  13  -73.53   69.65
  -3   5 -13  -27.81   32.00
   3  -5  14  -76.11   72.08
  -3   5 -14    9.22   35.24
   3  -5  15   88.26   89.75
  -3   5 -15   -2.29   57.27
   3  -4 -13  516.94   50.83
   3  -4 -13  719.77  110.51
  -3   4  13  450.02   79.23
   3  -4 -12  275.54  114.89
   3  -4 -12  464.98   39.60
  -3   4  12  410.49   68.02
   3  -4 -11   20.53   21.12
   3  -4 -11   17.11   69.81
  -3   4  11   25.79   48.28
  -3   4  11   87.34   31.62
   3  -4 -10  327.47   27.11
   3  -4 -10  314.91   70.92
  -3   4  10  271.50   49.99
  -3   4  10  380.21   39.60
   3  -4  -9  301.51   24.06
   3  -4  -9  287.86   75.68
  -3   4   9  292.85   42.36
  -3   4   9  308.56   30.46
   3  -4  -8 1095.84   42.68
   3  -4  -8 1166.57  116.57
  -3   4   8 1001.60   48.23
  -3   4   8 1032.74   66.94
   3  -4  -7  459.58   24.61
   3  -4  -7  473.84   48.50
   3  -4  -7  498.52   78.42
  -3   4   7  443.20   61.16
  -3   4   7  356.74   31.27
  -3   4   7  435.49   44.20
   3  -4  -6 2866.97  153.94
   3  -4  -6 2892.35  125.23
   3  -4  -6 2931.19   87.22
  -3   4   6 2935.69  145.61
  -3   4   6 2795.41   95.10
  -3   4   6 2951.97  120.67
   3  -4  -5   46.83   29.81
   3  -4  -5   11.97   10.24
   3  -4  -5   15.29   20.68
  -3   4   5   20.97   25.70
  -3   4   5    9.70   13.21
  -3   4   5   -0.22   18.97
   3  -4  -4 1225.09   37.43
   3  -4  -4 1145.74   73.62
   3  -4  -4 1264.86   59.43
  -3   4   4 1298.07   45.03
  -3   4   4 1311.42   82.75
  -3   4   4 1200.27   57.08
   3  -4  -3  538.98   23.17
   3  -4  -3  514.57   47.30
   3  -4  -3  570.95   34.48
  -3   4   3  556.46   33.76
  -3   4   3  546.11   41.95
  -3   4   3  518.06   26.52
   3  -4  -2 1418.52   70.42
   3  -4  -2 1286.27   47.53
   3  -4  -2 1330.73   45.28
   3  -4  -2 1254.82   58.27
  -3   4   2 1216.19   50.19
  -3   4   2 1268.86   47.55
   3  -4   0  700.83   27.22
   3  -4   0  849.80   40.67
   3  -4   0  880.11   37.55
  -3   4   0  797.32   34.52
  -3   4   0  766.54   41.13
  -3   4   0  843.76   36.82
   3  -4   1  927.82   39.19
   3  -4   1  933.38   36.30
   3  -4   1  892.36   29.50
  -3   4  -1  953.75   48.88
  -3   4  -1  990.64   32.89
  -3   4  -1  946.21   34.99
   3  -4   2 1419.32   44.78
   3  -4   2 1447.67   57.46
   3  -4   2 1397.29   40.34
  -3   4  -2 1408.47   58.58
  -3   4  -2 1408.93   40.30
  -3   4  -2 1438.29   45.65
   3  -4   3  222.60   13.56
   3  -4   3  282.89   18.45
   3  -4   3  321.26   20.95
  -3   4  -3  290.24   17.75
  -3   4  -3  261.08   12.47
   3  -4   417771.58  962.42
   3  -4   514902.32  667.42
   3  -4   515227.74  706.55
   3  -4   514635.63  766.03
  -3   4  -515165.91  700.23
   3  -4   6  678.07   24.63
   3  -4   6  721.08   34.04
  -3   4  -6  615.32   31.39
   3  -4   7 2401.37   69.41
   3  -4   7 2366.62   85.94
  -3   4  -7 2383.32   80.13
  -3   4  -7 2307.73   92.82
   3  -4   8  442.21   22.46
   3  -4   8  515.46   43.17
  -3   4  -8  444.44   37.38
  -3   4  -8  443.06   35.75
   3  -4   9 5386.88  193.64
   3  -4   9 5665.76  240.94
  -3   4  -9 5287.15  228.37
  -3   4  -9 5160.95  164.43
  -3   4  -9 5351.37  203.25
  -3   4  -9 5198.28  167.96
   3  -4  10 4192.44  200.71
  -3   4 -10 4167.13  136.14
  -3   4 -10 4039.21  172.29
  -3   4 -10 4139.14  191.47
  -3   4 -10 4055.27  138.38
  -3   4 -11   14.23   18.93
  -3   4 -11   15.13   32.30
  -3   4 -11   34.79   20.75
  -3   4 -11   -7.31   23.32
  -3   4 -12 1088.96   59.69
  -3   4 -12 1064.15   69.54
  -3   4 -12 1053.40   73.84
  -3   4 -13   53.71   28.29
  -3   4 -13   34.24   29.09
  -3   4 -13  114.21   35.10
  -3   4 -14  157.53   36.92
  -3   4 -14  147.91   60.90
  -3   4 -15 1134.46  103.45
   3  -3 -13  192.70   34.51
   3  -3 -13  178.43   73.51
  -3   3  13  234.29   56.58
   3  -3 -12  381.16   99.48
   3  -3 -12  342.53   33.55
  -3   3  12  375.37   72.63
   3  -3 -11   17.74   17.24
   3  -3 -11  -31.05   44.48
  -3   3  11   -1.40   27.23
  -3   3  11   16.17   30.82
   3  -3 -10    8.15   15.78
   3  -3 -10   -5.59   43.68
  -3   3  10   50.62   30.06
  -3   3  10   35.13   19.51
   3  -3  -9 1056.23   39.94
   3  -3  -9 1170.38   96.26
  -3   3   9 1120.40   47.90
  -3   3   9 1156.76   69.69
   3  -3  -8 3377.27  157.99
   3  -3  -8 3301.79  104.60
   3  -3  -8 3283.90  189.37
  -3   3   8 3066.82  185.18
  -3   3   8 3379.68  149.76
  -3   3   8 3285.47  110.62
   3  -3  -7   63.01   13.70
   3  -3  -7   68.52   42.12
   3  -3  -7   84.01   27.00
  -3   3   7   58.22   40.04
  -3   3   7  128.29   15.40
  -3   3   7   84.42   27.14
   3  -3  -6  924.63   48.20
   3  -3  -6  798.83   25.76
   3  -3  -6  858.37   61.81
  -3   3   6  780.91   61.24
  -3   3   6  784.13   28.90
  -3   3   6  810.15   46.53
   3  -3  -5   -3.82   19.21
   3  -3  -5   28.44    8.74
   3  -3  -5   46.88   29.90
  -3   3   5   36.66   26.88
  -3   3   5   19.56   10.58
  -3   3   5   -0.64   19.39
   3  -3  -4  794.64   54.13
   3  -3  -4  727.31   21.37
   3  -3  -4  827.85   36.97
  -3   3   4  733.22   48.47
  -3   3   4  759.92   25.22
  -3   3   4  683.29   38.70
   3  -3  -3 4692.51  192.26
   3  -3  -3 4430.23  156.62
   3  -3  -3 4692.90  132.46
  -3   3   3 4350.86  172.12
  -3   3   3 4527.27  137.89
  -3   3   3 4545.72  157.42
   3  -3  -218839.41 1059.34
  -3   3   219829.02 1068.42
   3  -3  -111987.99  557.41
   3  -3  -112711.14  528.23
   3  -3   0   20.16   12.80
   3  -3   0   38.88   13.02
   3  -3   0   43.26   17.51
  -3   3   0   35.85   12.96
  -3   3   0   59.22   16.34
  -3   3   0    1.42   16.31
   3  -3   1  263.07   21.07
   3  -3   1  187.73   13.76
   3  -3   1  197.60   15.84
  -3   3  -1  194.75   12.98
  -3   3  -1  218.69   14.59
  -3   3  -1  223.44   20.51
   3  -3   2  502.26   32.98
   3  -3   2  464.89   16.45
   3  -3   2  447.00   22.01
   3  -3   2  521.81   18.53
  -3   3  -2  478.75   18.38
  -3   3  -2  468.86   16.66
   3  -3   3 3582.70  106.17
   3  -3   3 3304.28   76.43
   3  -3   3 3241.78   86.38
   3  -3   3 3018.22  121.66
   3  -3   3 3442.61   81.54
  -3   3  -3 3542.20  107.74
   3  -3   4   71.25   16.83
   3  -3   4   76.56   13.06
  -3   3  -4   84.28   13.11
  -3   3  -4   95.53   12.53
   3  -3   515029.13  665.55
   3  -3   515234.38  722.81
   3  -3   6   43.47    9.10
   3  -3   6   84.14   20.13
  -3   3  -6   53.60    6.28
  -3   3  -6   18.48   13.16
  -3   3  -6    0.72    6.25
  -3   3  -6   64.95   17.84
   3  -3   7 1797.60   77.70
   3  -3   7 1537.13   44.05
   3  -3   7 1592.99   38.36
  -3   3  -7 1598.84   55.04
  -3   3  -7 1562.32   56.02
  -3   3  -7 1465.44   47.01
  -3   3  -7 1456.27   46.62
   3  -3   8  540.91   22.45
   3  -3   8  516.64   21.10
   3  -3   8  685.93   51.49
  -3   3  -8  618.86   31.47
  -3   3  -8  552.86   29.81
  -3   3  -8  551.55   42.98
   3  -3   9  161.23   18.51
   3  -3   9  241.88   17.92
   3  -3   9  155.65   36.02
  -3   3  -9  137.00   23.74
  -3   3  -9  223.87   25.99
  -3   3  -9  188.63   27.02
   3  -3  10 6137.46  223.88
   3  -3  10 6108.54  329.85
  -3   3 -10 6330.59  292.46
  -3   3 -10 5901.52  239.01
  -3   3 -10 6365.68  248.59
   3  -3  11 1144.31   50.59
  -3   3 -11 1182.72   58.23
  -3   3 -11 1149.61   83.99
   3  -3  12   43.43   22.62
  -3   3 -12   33.44   25.20
  -3   3 -12    8.28   38.34
  -3   3 -12   50.43   38.70
   3  -3  13   40.72   26.87
  -3   3 -13   54.79   43.87
  -3   3 -13   59.79   27.90
  -3   3 -14   36.91   41.27
  -3   3 -14   36.78   38.02
  -3   3 -15  163.87   76.54
  -3   3 -15  215.23   61.45
   3  -2 -14   12.05   25.95
   3  -2 -14  -19.72   54.18
  -3   2  14    5.97   53.24
   3  -2 -13    6.06   22.13
   3  -2 -13   -2.21   51.54
  -3   2  13  -76.23   36.20
   3  -2 -12   92.61   21.26
   3  -2 -12   90.79   63.22
  -3   2  12   95.43   50.35
  -3   2  12   -6.71   32.14
   3  -2 -11   41.00   16.96
   3  -2 -11   10.18   44.59
  -3   2  11   24.96   31.87
  -3   2  11   33.40   20.80
   3  -2 -10   22.08   13.23
   3  -2 -10    5.27   37.87
  -3   2  10   48.01   25.30
  -3   2  10    6.84   15.27
   3  -2  -9  590.21   26.49
   3  -2  -9  604.25   55.31
   3  -2  -9  566.14   84.58
  -3   2   9  668.54   48.74
  -3   2   9  595.39   72.35
  -3   2   9  608.70   28.75
   3  -2  -8 2454.87   69.47
   3  -2  -8 2393.71  111.01
   3  -2  -8 2713.98  143.12
  -3   2   8 2311.53  104.69
  -3   2   8 2407.70   79.85
  -3   2   8 2417.16  137.67
   3  -2  -7 2074.45   54.71
   3  -2  -7 2041.21   83.67
   3  -2  -7 2085.23  110.94
  -3   2   7 2220.94  132.16
  -3   2   7 2041.05   87.79
  -3   2   7 1993.47   56.29
   3  -2  -6  290.76   15.21
   3  -2  -6  305.05   34.43
   3  -2  -6  276.00   43.14
  -3   2   6  277.02   49.51
  -3   2   6  302.04   28.12
  -3   2   6  296.53   14.40
   3  -2  -5 1550.69   59.13
   3  -2  -5 1611.58   39.09
   3  -2  -5 1531.52   82.40
  -3   2   5 1503.72   38.80
  -3   2   5 1631.59   80.22
  -3   2   5 1552.28   61.10
   3  -2  -4 2016.06  109.49
   3  -2  -4 2085.48   71.28
   3  -2  -4 1982.14   48.24
  -3   2   4 2082.27   70.93
  -3   2   4 2171.77   90.63
  -3   2   4 2157.48   55.27
   3  -2  -3 4375.44  169.36
   3  -2  -3 3957.51  105.63
   3  -2  -3 4191.30  135.05
  -3   2   3 4307.25  160.65
  -3   2   3 4307.80  141.56
  -3   2   3 4386.77  124.09
   3  -2  -1 5470.15  170.53
   3  -2  -1 5235.05  191.41
   3  -2  -1 5681.59  171.74
   3  -2  -1 5534.76  173.35
  -3   2   1 5445.18  170.80
  -3   2   1 5867.63  181.73
   3  -2   0 1025.05   28.38
   3  -2   0 1017.81   42.61
   3  -2   0 1004.77   31.00
  -3   2   0  994.47   29.71
  -3   2   0 1007.80   32.09
   3  -2   1 5558.38  160.14
   3  -2   1 5453.08  151.87
   3  -2   1 5561.60  166.91
   3  -2   1 5532.88  201.66
  -3   2  -1 5457.99  168.51
   3  -2   2  147.43    9.16
   3  -2   2  197.48   12.72
   3  -2   2  166.89    8.92
   3  -2   2  180.27   13.97
  -3   2  -2  150.53   11.51
   3  -2   4 6725.67  212.96
   3  -2   4 6836.50  240.16
  -3   2  -4 7031.17  240.95
  -3   2  -4 6770.34  233.69
   3  -2   5  590.20   32.40
   3  -2   5  564.70   18.18
   3  -2   5  558.54   18.81
  -3   2  -5  532.92   21.88
  -3   2  -5  612.14   27.79
  -3   2  -5  500.92   21.48
   3  -2   6   27.02    8.93
   3  -2   6   15.36   20.25
   3  -2   6   20.59    9.68
  -3   2  -6   23.93   12.16
  -3   2  -6   27.10   15.54
  -3   2  -6   19.47   16.95
   3  -2   7 1985.39   55.82
   3  -2   7 1991.42   59.62
   3  -2   7 2088.56   93.28
  -3   2  -7 2150.54   79.89
  -3   2  -7 2080.16   64.38
  -3   2  -7 2032.20   80.48
   3  -2   8   47.01   14.27
   3  -2   8   33.15   11.59
   3  -2   8   40.36   32.78
  -3   2  -8   56.34   15.93
  -3   2  -8   44.88   24.60
  -3   2  -8   60.99   20.65
   3  -2   912371.91  541.66
   3  -2   912084.38  660.85
   3  -2   912140.11  542.61
  -3   2  -912519.76  586.42
  -3   2  -911723.73  560.79
  -3   2  -912083.52  596.03
   3  -2  10  566.15   34.68
   3  -2  10  544.62   78.82
  -3   2 -10  472.55   55.70
  -3   2 -10  554.32   47.05
  -3   2 -10  598.66   45.10
   3  -2  11  117.58   27.18
  -3   2 -11  117.73   39.83
  -3   2 -11   90.84   37.67
  -3   2 -11   80.77   24.99
   3  -2  12  264.11   37.46
  -3   2 -12  323.70   41.48
  -3   2 -12  297.47   52.63
   3  -2  13   69.41   37.00
  -3   2 -13  120.20   40.12
  -3   2 -13   75.46   50.81
  -3   2 -14   39.02   30.68
  -3   2 -14  -10.64   50.46
   3  -1 -14  553.22   45.06
   3  -1 -14  354.26  115.49
  -3   1  14  396.47   66.80
   3  -1 -13   57.21   22.17
   3  -1 -13   84.42   65.52
  -3   1  13   27.38   37.73
   3  -1 -12 1012.97   47.00
   3  -1 -12 1104.12   96.50
  -3   1  12 1034.10   93.10
   3  -1 -11  284.50   24.46
   3  -1 -11  329.15   57.33
  -3   1  11  242.97   23.59
  -3   1  11  321.68   37.75
   3  -1 -10 1065.63   40.45
   3  -1 -10 1109.33   83.95
   3  -1 -10 1378.72   89.43
  -3   1  10  978.41   38.68
  -3   1  10 1092.85   61.59
   3  -1  -9 2096.15  118.12
   3  -1  -9 2028.28   61.61
   3  -1  -9 1939.64  120.23
  -3   1   9 2054.25  133.74
  -3   1   9 2103.23   64.65
  -3   1   9 2148.26   94.85
   3  -1  -8 1836.13   52.15
   3  -1  -8 1679.22   75.95
   3  -1  -8 1617.99  100.27
  -3   1   8 1643.18   74.47
  -3   1   8 1666.39   99.83
  -3   1   8 1617.62   45.06
   3  -1  -7 3697.78   97.18
   3  -1  -7 3703.53  133.30
   3  -1  -7 3661.33  167.68
  -3   1   7 3641.51  166.92
  -3   1   7 3632.59  150.00
  -3   1   7 3588.80   99.80
   3  -1  -6 9520.43  390.34
   3  -1  -6 9181.95  433.60
  -3   1   610841.71  521.29
  -3   1   6 9344.19  387.67
  -3   1   6 9339.95  329.17
   3  -1  -5 6344.19  223.92
   3  -1  -5 6188.76  261.41
  -3   1   5 5994.71  250.27
  -3   1   5 5975.78  173.93
  -3   1   5 6168.76  220.98
   3  -1  -3 7904.93  327.01
   3  -1  -3 8101.52  292.70
  -3   1   3 7903.25  291.57
  -3   1   3 8209.09  325.62
   3  -1  -2 8358.03  345.37
  -3   1   2 8359.98  313.41
  -3   1   2 8456.21  323.53
   3  -1  -1 8060.18  311.83
  -3   1   1 8372.88  315.51
   3  -1   0  272.28    8.81
   3  -1   0  307.19   20.47
   3  -1   0  246.35   12.90
   3  -1   0  256.72   13.50
  -3   1   0  238.52   11.23
   3  -1   1 1595.75   36.21
   3  -1   1 1618.80   37.05
   3  -1   1 1687.52   51.18
  -3   1  -1 1581.59   40.10
  -3   1  -1 1621.66   49.74
  -3   1  -1 1661.20   42.39
   3  -1   3 7042.81  219.16
   3  -1   3 6943.89  243.86
   3  -1   3 6887.02  228.35
  -3   1  -3 7251.12  231.07
  -3   1  -3 6959.81  222.45
  -3   1  -3 6960.28  248.70
   3  -1   419351.62  987.44
   3  -1   5  304.78   18.45
   3  -1   5  198.25   11.92
   3  -1   5  217.29   23.24
  -3   1  -5  281.62   20.82
  -3   1  -5  217.54   14.36
  -3   1  -5  246.37   23.99
   3  -1   6  497.40   33.54
   3  -1   6  408.55   17.26
   3  -1   6  451.45   24.07
  -3   1  -6  397.56   25.14
  -3   1  -6  454.90   33.77
  -3   1  -6  475.43   29.87
   3  -1   7   71.98   18.08
   3  -1   7   88.95   27.11
   3  -1   7   39.58   10.75
  -3   1  -7   59.72   20.90
  -3   1  -7   45.19   14.51
  -3   1  -7   76.46   24.51
   3  -1   8  744.76   40.46
   3  -1   8  703.30   28.37
   3  -1   8  726.81   62.01
  -3   1  -8  683.89   33.26
  -3   1  -8  730.44   48.97
  -3   1  -8  736.32   47.50
   3  -1   9 7021.64  270.02
   3  -1   9 6833.94  251.89
   3  -1   9 7016.81  363.03
  -3   1  -9 6916.40  267.52
  -3   1  -9 6668.11  300.84
  -3   1  -9 6729.91  302.15
   3  -1  10  993.25   57.13
   3  -1  10 1007.53   96.65
  -3   1 -10  830.89   59.99
  -3   1 -10  898.55   68.19
  -3   1 -10  948.97   45.47
   3  -1  11   35.58   25.43
  -3   1 -11   29.85   36.61
  -3   1 -11   53.82   34.38
  -3   1 -11   41.46   21.09
   3  -1  12  314.90   43.68
  -3   1 -12  258.06   54.07
  -3   1 -12  244.00   33.75
   3  -1  13   10.53   29.57
  -3   1 -13   -0.95   31.22
  -3   1 -13    8.53   40.38
  -3   1 -14 2017.17  135.10
  -3   1 -14 2108.52  170.38
   3   0 -15  134.99   33.88
   3   0 -15   90.55   80.06
  -3   0  15  -51.06   67.51
   3   0 -14   42.02   65.84
   3   0 -14  277.00   34.65
  -3   0  14  303.15   51.73
   3   0 -13    2.20   18.86
   3   0 -13   57.26   57.78
  -3   0  13   19.07   22.21
  -3   0  13    1.31   39.38
   3   0 -12  150.56   23.15
   3   0 -12  221.25   53.85
  -3   0  12  189.15   50.07
  -3   0  12  231.80   22.72
   3   0 -11   55.44   16.42
   3   0 -11    5.50   31.42
   3   0 -11   31.44   38.37
  -3   0  11   28.54   37.74
  -3   0  11   61.41   15.33
   3   0 -10 1372.86   46.07
   3   0 -10 1506.69   77.51
   3   0 -10 1286.87   90.63
  -3   0  10 1470.20   46.32
  -3   0  10 1272.83   84.36
  -3   0  10 1101.46  110.34
   3   0  -9 7870.41  277.24
   3   0  -9 7806.64  365.98
   3   0  -9 7807.00  432.99
  -3   0   9 7850.52  271.53
  -3   0   9 7928.12  362.77
  -3   0   9 7872.11  401.57
   3   0  -8 2601.87  113.24
   3   0  -8 2747.55   76.42
   3   0  -8 2718.55  152.93
  -3   0   8 2975.38  140.30
  -3   0   8 2866.55   73.11
  -3   0   8 2700.66  106.54
   3   0  -7  617.45   51.22
   3   0  -7  658.54   20.31
   3   0  -7  527.36   30.86
  -3   0   7  757.74   52.58
  -3   0   7  677.76   19.30
  -3   0   7  625.68   34.59
   3   0  -6  151.57    8.76
   3   0  -6   99.65   17.69
  -3   0   6  101.00   27.55
  -3   0   6  191.22    8.36
  -3   0   6  166.68   19.77
   3   0  -5   29.00    5.48
   3   0  -5   26.27   13.21
   3   0  -5   22.03   26.51
  -3   0   5   51.73   23.00
  -3   0   5   40.21    5.82
  -3   0   5   34.08   14.09
   3   0  -4 4226.99  130.18
   3   0  -4 4070.13  153.88
  -3   0   4 4123.67  150.38
  -3   0   4 3906.15  124.86
   3   0  -2  152.18   12.76
   3   0  -2   98.78    3.84
   3   0  -2  168.26   22.86
  -3   0   2  108.17   16.59
   3   0   0  901.12   18.91
   3   0   0  959.44   31.29
   3   0   0  939.45   21.78
   3   0   0  965.29   44.60
  -3   0   0  908.02   40.16
  -3   0   0  940.96   21.84
   3   0   1  985.56   21.94
   3   0   1 1030.47   23.78
   3   0   1  948.54   45.90
  -3   0  -1 1005.50   23.01
  -3   0  -1 1074.98   22.83
  -3   0  -1 1063.68   42.49
   3   0   3 8565.61  326.90
   3   0   3 8273.99  276.09
   3   0   3 8161.75  296.81
  -3   0  -3 8350.41  325.48
  -3   0  -3 8590.62  297.52
   3   0   4 3395.27   88.77
   3   0   4 3203.49  105.78
   3   0   4 3409.84  110.78
  -3   0  -4 3216.46  114.56
  -3   0  -4 3359.70   93.91
  -3   0  -4 3300.62   98.24
   3   0   5 2666.61   70.31
   3   0   5 2694.90   90.36
   3   0   5 2846.82  100.43
  -3   0  -5 2663.37   75.11
  -3   0  -5 2559.21   84.97
  -3   0  -5 2596.87  111.87
   3   0   6  843.23   27.35
   3   0   6  841.98   40.62
   3   0   6  971.99   53.44
  -3   0  -6  929.69   31.09
  -3   0  -6  961.80   44.41
  -3   0  -6  992.70   56.48
   3   0   7 4990.37  156.97
   3   0   7 5042.93  183.70
   3   0   7 4809.50  215.18
  -3   0  -7 4750.28  196.01
  -3   0  -7 4673.10  157.82
  -3   0  -7 4735.99  189.56
   3   0   8  981.68   51.22
   3   0   8 1043.96   37.82
   3   0   8 1157.19   77.52
  -3   0  -8  976.88   62.14
  -3   0  -8  899.99   61.29
  -3   0  -8  959.43   50.10
   3   0   9  329.18   36.35
   3   0   9  285.42   30.91
   3   0   9  402.90   61.95
  -3   0  -9  276.89   47.15
  -3   0  -9  370.86   26.43
  -3   0  -9  444.25   42.40
   3   0  10 1581.03  137.71
   3   0  10 1719.50   83.49
  -3   0 -10 1664.68   96.14
  -3   0 -10 1486.39   74.61
  -3   0 -10 1646.95  110.31
   3   0  11  563.57   51.22
  -3   0 -11  410.78   68.29
  -3   0 -11  678.60   49.53
  -3   0 -11  632.33   65.79
   3   0  12  300.68   46.40
  -3   0 -12  358.50   36.36
  -3   0 -12  347.66   65.84
   3   0  13  535.17   61.89
  -3   0 -13  494.27   81.53
  -3   0 -13  291.19   56.08
  -3   0 -14  219.44   46.19
  -3   0 -14  245.94   78.01
   3   1 -15   43.07   52.90
   3   1 -15   31.51   29.21
  -3  -1  15   28.19   57.36
   3   1 -14  325.28   35.74
   3   1 -14   69.16   68.22
  -3  -1  14  301.10   60.04
   3   1 -13    8.26   18.72
   3   1 -13  -19.45   38.58
  -3  -1  13    0.75   16.73
  -3  -1  13   30.42   36.75
   3   1 -12  933.72   42.31
   3   1 -12  889.30   80.31
  -3  -1  12  851.06   36.72
  -3  -1  12  820.02   73.26
   3   1 -11  938.59   39.36
   3   1 -11 1005.39   72.59
   3   1 -11 1025.81   76.82
  -3  -1  11  923.17   33.85
  -3  -1  11  901.68   59.59
   3   1 -1015255.09  723.84
   3   1 -1016401.36  896.68
   3   1 -1015655.53  959.08
  -3  -1  1015121.39  925.82
  -3  -1  1015701.84  715.90
  -3  -1  1015456.30  846.60
   3   1  -9 1608.27   92.73
   3   1  -9 1654.05   81.19
   3   1  -9 1615.49   46.88
  -3  -1   9 1627.09   97.37
  -3  -1   9 1657.76   42.09
  -3  -1   9 1538.10   82.93
   3   1  -8    2.68   15.54
   3   1  -8    9.31    9.37
   3   1  -8    0.74   31.85
  -3  -1   8    7.30    7.63
  -3  -1   8   11.73   25.96
  -3  -1   8    5.78   16.35
   3   1  -7  712.74   21.32
   3   1  -7  568.41   43.24
   3   1  -7  668.29   39.19
  -3  -1   7  688.87   17.45
  -3  -1   7  634.49   34.41
  -3  -1   7  733.84   47.47
   3   1  -6  856.43   23.32
   3   1  -6  885.47   34.30
   3   1  -6  938.11   49.53
  -3  -1   6  860.74   18.70
  -3  -1   6  945.01   48.98
  -3  -1   6  827.25   42.82
   3   1  -5 4637.43  146.53
   3   1  -5 4509.32  167.58
  -3  -1   5 4492.58  170.65
  -3  -1   5 4705.79  158.53
  -3  -1   5 4563.89  111.02
  -3  -1   5 4613.05  138.61
   3   1  -4 3705.09  113.01
   3   1  -4 3834.53  145.94
  -3  -1   4 3726.51   95.77
  -3  -1   4 3720.89  146.21
   3   1  -2  537.64   34.25
   3   1  -2  617.36   27.89
   3   1  -2  616.28   14.74
  -3  -1   2  624.01   13.58
  -3  -1   2  619.18   35.54
  -3  -1   2  644.42   27.24
   3   1  -1 1974.72   40.65
   3   1  -1 1852.66   49.90
   3   1  -1 1956.82   74.82
  -3  -1   1 1862.10   64.25
  -3  -1   1 1860.87   55.53
  -3  -1   1 1931.61   40.53
   3   1   0  112.04    6.42
   3   1   0  138.70   22.95
  -3  -1   0  133.01    9.27
  -3  -1   0  100.75   19.67
   3   1   1 1422.77   69.42
   3   1   1 1371.68   31.47
   3   1   1 1430.98   32.85
  -3  -1  -1 1405.39   33.14
  -3  -1  -1 1518.81   28.36
  -3  -1  -1 1408.21   54.18
  -3  -1  -218816.79 1009.37
   3   1   312115.19  536.95
   3   1   311256.98  474.89
  -3  -1  -311746.40  537.06
   3   1   4   35.59   20.91
   3   1   4   39.15   21.94
   3   1   4   35.02    8.90
  -3  -1  -4   15.31   23.36
  -3  -1  -4   56.90    9.80
  -3  -1  -4   61.31   15.34
   3   1   5  826.10   46.80
   3   1   5  861.85   30.25
   3   1   5  825.32   45.26
  -3  -1  -5  879.79   54.33
  -3  -1  -5  786.46   28.38
  -3  -1  -5  766.13   37.80
   3   1   6  253.87   35.67
   3   1   6  362.27   32.11
   3   1   6  278.42   16.19
  -3  -1  -6  335.58   40.80
  -3  -1  -6  279.77   18.03
  -3  -1  -6  305.41   28.81
   3   1   7  462.29   22.60
   3   1   7  459.60   53.92
   3   1   7  386.18   41.53
  -3  -1  -7  570.87   27.33
  -3  -1  -7  537.58   51.53
  -3  -1  -7  540.60   40.74
   3   1   813304.83  763.96
   3   1   813937.61  703.86
   3   1   813712.60  632.51
  -3  -1  -813702.53  644.99
  -3  -1  -813462.94  755.23
  -3  -1  -814201.93  735.64
   3   1   9  438.82   47.46
   3   1   9  447.50   72.44
  -3  -1  -9  445.85   63.02
  -3  -1  -9  467.52   29.75
  -3  -1  -9  579.62   49.39
   3   1  10   38.24   30.77
   3   1  10    5.10   58.19
  -3  -1 -10   32.92   19.72
  -3  -1 -10   -7.42   33.52
  -3  -1 -10  -20.02   44.65
   3   1  11   11.01   32.75
  -3  -1 -11   25.69   25.87
  -3  -1 -11   -7.58   65.12
  -3  -1 -11   39.13   39.60
   3   1  12  223.23   48.58
  -3  -1 -12  147.79   39.78
  -3  -1 -12  122.36   52.78
   3   1  13   73.52   41.05
  -3  -1 -13   -8.59   34.20
  -3  -1 -13  -69.22   52.31
   3   2 -16 -159.90   87.40
   3   2 -15  499.12   81.91
  -3  -2  15  530.67   86.42
   3   2 -14 -109.49   43.17
  -3  -2  14   18.36   41.43
  -3  -2  14   -5.89   44.60
   3   2 -13   90.57   48.60
  -3  -2  13    5.93   15.28
  -3  -2  13   24.39   34.50
   3   2 -12  270.31   52.27
   3   2 -12  332.04   50.99
  -3  -2  12  339.08   21.39
  -3  -2  12  322.31   49.46
   3   2 -11  730.34   58.41
   3   2 -11  677.33   35.68
   3   2 -11  704.71   77.56
  -3  -2  11  647.22   58.05
  -3  -2  11  738.60   32.16
   3   2 -10 2101.31   95.98
   3   2 -10 1690.94  105.35
  -3  -2  10 1868.15  104.20
  -3  -2  10 1999.25   54.93
  -3  -2  10 2061.43  125.95
   3   2  -9 3321.81  148.48
   3   2  -9 3347.06  134.20
  -3  -2   9 3136.13  161.64
  -3  -2   9 3449.51   94.47
  -3  -2   9 3206.11  140.20
   3   2  -8  157.67   18.68
   3   2  -8  140.04   31.04
  -3  -2   8  129.37   21.40
  -3  -2   8  174.52   10.58
  -3  -2   8  119.63   25.79
  -3  -2   8  129.06   32.67
   3   2  -7 7022.46  268.55
   3   2  -7 7366.20  306.02
  -3  -2   7 7066.49  216.53
  -3  -2   7 7087.34  302.63
  -3  -2   7 7044.74  269.30
   3   2  -6 2702.79   81.88
   3   2  -6 2538.07  106.46
   3   2  -6 2753.71   99.44
  -3  -2   6 2537.31   57.22
  -3  -2   6 2523.66   80.03
  -3  -2   6 2589.94  101.16
   3   2  -5 9754.17  437.08
   3   2  -5 9628.60  387.47
   3   2  -510016.93  433.04
  -3  -2   5 9578.37  401.39
   3   2  -3 1046.23   37.68
   3   2  -3 1005.12   47.59
   3   2  -3 1059.86   30.57
  -3  -2   3 1145.99   44.27
  -3  -2   3 1086.82   27.01
  -3  -2   3 1006.14   38.42
   3   2  -2 1206.71   36.70
   3   2  -2 1175.21   28.79
   3   2  -2 1095.19   52.62
  -3  -2   2 1192.64   47.49
  -3  -2   2 1142.06   26.74
  -3  -2   2 1183.54   35.86
   3   2  -1 7315.58  306.96
  -3  -2   1 7856.92  308.09
   3   2   0 2650.30   68.57
   3   2   0 2637.92  101.12
  -3  -2   0 2698.35   70.63
  -3  -2   0 2819.83   57.72
  -3  -2   0 2666.91  102.80
   3   2   2   12.71   14.58
   3   2   2   12.56    7.90
   3   2   2   26.71   19.55
  -3  -2  -2   21.07    8.64
  -3  -2  -2   19.77   24.21
  -3  -2  -2   32.02   13.83
   3   2   3 3888.26  136.79
   3   2   3 4211.18  170.76
   3   2   3 4285.08  122.68
  -3  -2  -3 4115.29  157.96
  -3  -2  -3 4201.32  120.49
  -3  -2  -3 4111.91  136.32
   3   2   4  213.48   31.10
   3   2   4  274.92   29.15
   3   2   4  213.42   13.43
  -3  -2  -4  169.97   35.75
  -3  -2  -4  186.34   14.65
  -3  -2  -4  228.73   24.95
   3   2   5  183.49   29.75
   3   2   5  202.51   14.25
   3   2   5  146.29   32.04
  -3  -2  -5  238.08   15.73
  -3  -2  -5  109.99   35.85
  -3  -2  -5  199.66   25.10
   3   2   6 2878.10  126.79
   3   2   6 2820.18   86.39
   3   2   6 2936.02  129.09
  -3  -2  -6 2751.82   87.57
  -3  -2  -6 3213.54  147.97
  -3  -2  -6 2880.35  117.64
   3   2   7 2572.94  128.43
   3   2   7 2431.85   81.16
   3   2   7 2486.21  118.94
  -3  -2  -7 2484.43   83.50
  -3  -2  -7 2504.75  139.54
  -3  -2  -7 2489.23  114.49
   3   2   8 4857.33  265.01
   3   2   8 4795.15  231.57
   3   2   8 5103.43  184.88
  -3  -2  -8 5074.50  270.59
  -3  -2  -8 4997.71  184.22
  -3  -2  -8 5263.06  235.61
   3   2   9  457.49   55.07
   3   2   9  446.61   80.64
  -3  -2  -9  518.70   40.70
  -3  -2  -9  488.14   73.48
  -3  -2  -9  469.88   56.18
   3   2  10  116.54   41.38
   3   2  10  149.20   68.11
  -3  -2 -10  105.94   24.41
  -3  -2 -10   79.54   68.79
  -3  -2 -10  123.12   44.46
   3   2  11   30.67   36.82
  -3  -2 -11   17.29   20.35
  -3  -2 -11   -1.91   40.70
   3   2  12    9.57   40.15
  -3  -2 -12    7.25   32.31
  -3  -2 -12    2.05   49.31
   3   2  13   85.22   55.20
  -3  -2 -13  154.05   63.80
  -3  -2 -13   47.24   32.81
   3   3 -16 1102.28  168.95
   3   3 -16 1276.86  125.51
  -3  -3  16 1376.29  143.70
   3   3 -15  531.42   78.09
   3   3 -15  486.20  108.49
  -3  -3  15  544.91   88.75
   3   3 -14  839.85   90.97
   3   3 -14  542.12   76.65
  -3  -3  14  821.43   84.09
   3   3 -13  458.93   62.04
   3   3 -13  258.25   59.26
   3   3 -13  263.50   68.88
  -3  -3  13  330.28   24.63
  -3  -3  13  412.77   57.02
   3   3 -12 1036.43   89.87
   3   3 -12  922.24   72.38
   3   3 -12  822.98   71.99
  -3  -3  12  893.83   72.72
  -3  -3  12  953.78   35.05
   3   3 -11 1290.13   72.35
   3   3 -11 1103.45   84.80
   3   3 -11  992.03   77.57
  -3  -3  11 1170.50   38.70
  -3  -3  11 1297.05   75.78
   3   3 -10  -27.94   30.96
   3   3 -10   13.36   26.65
   3   3 -10   14.35   23.83
  -3  -3  10    7.53    8.90
  -3  -3  10    7.13   34.87
  -3  -3  10   25.50   30.49
   3   3  -9 2069.83   82.18
   3   3  -9 2166.29  113.03
   3   3  -9 1980.80   94.09
  -3  -3   9 2016.29   51.46
  -3  -3   9 2097.81   85.66
  -3  -3   9 2037.77  102.47
   3   3  -8 1239.56   44.12
   3   3  -8 1230.12   61.56
   3   3  -8 1364.92   75.13
  -3  -3   8 1135.83   57.82
  -3  -3   8 1213.35   29.90
  -3  -3   8 1245.66   65.27
   3   3  -7 2027.59   81.00
   3   3  -7 1853.69   70.05
   3   3  -7 1833.65   87.51
  -3  -3   7 1871.36   45.89
  -3  -3   7 1928.68   71.67
  -3  -3   7 1999.48   82.23
   3   3  -6 7269.94  315.27
   3   3  -6 6761.75  258.82
   3   3  -6 6612.58  250.76
  -3  -3   6 6814.33  245.56
  -3  -3   6 6875.41  213.91
  -3  -3   6 7050.22  270.67
   3   3  -5  131.20   27.50
   3   3  -5  123.28   21.23
   3   3  -5  176.35   24.74
  -3  -3   5  154.88   24.17
  -3  -3   5  156.70   17.96
  -3  -3   420927.60 1155.13
   3   3  -3 1006.58   32.86
   3   3  -3  957.52   32.61
   3   3  -3 1060.06   57.20
  -3  -3   3  969.61   45.92
  -3  -3   3 1007.74   28.92
  -3  -3   3  979.12   34.98
   3   3  -2  926.67   25.86
   3   3  -2 1002.10   56.42
   3   3  -2  952.29   28.65
  -3  -3   2  905.19   28.49
  -3  -3   2  947.43   28.32
  -3  -3   2  895.53   48.40
   3   3  -1    9.11    7.20
   3   3  -1    9.44   22.64
   3   3  -1    6.68   10.41
  -3  -3   1   11.57    7.59
  -3  -3   1    2.31   10.03
  -3  -3   1   20.89   20.08
   3   3   0   21.45    9.34
   3   3   0   40.87    8.68
   3   3   0   41.10   24.95
  -3  -3   0   30.14    8.60
  -3  -3   0   22.16    7.47
  -3  -3   0   62.47   22.25
   3   3   112730.95  620.91
  -3  -3  -112355.46  591.60
   3   3   216497.73  885.71
  -3  -3  -217286.94  954.91
   3   3   3  599.43   36.95
   3   3   3  523.38   20.56
   3   3   3  581.10   44.47
  -3  -3  -3  617.92   43.14
  -3  -3  -3  559.29   23.00
  -3  -3  -3  592.18   38.47
   3   3   4 1739.26   50.75
   3   3   4 1777.16   79.72
   3   3   4 1521.83   85.78
  -3  -3  -4 1703.44   51.70
  -3  -3  -4 1781.33  100.21
  -3  -3  -4 1716.47   72.20
   3   3   5  355.49   36.08
   3   3   5  309.19   19.16
   3   3   5  414.47   32.88
  -3  -3  -5  288.46   19.76
  -3  -3  -5  218.95   40.46
  -3  -3  -5  208.23   34.25
   3   3   6 1538.76   83.21
   3   3   6 1395.59   86.82
   3   3   6 1401.75   50.71
  -3  -3  -6 1390.01   50.39
  -3  -3  -6 1576.77   76.03
  -3  -3  -6 1373.76  102.37
   3   3   7 4356.54  228.66
   3   3   7 4502.49  162.63
   3   3   7 4782.27  226.49
  -3  -3  -7 4681.04  211.70
  -3  -3  -7 4570.18  160.60
  -3  -3  -7 4603.54  254.87
   3   3   8 1019.15   90.26
  -3  -3  -8 1051.61   54.16
  -3  -3  -8 1119.33  105.22
  -3  -3  -8 1146.50   77.39
   3   3   9  -38.10   50.89
   3   3   9   -6.78   34.87
  -3  -3  -9    7.41   16.62
  -3  -3  -9  -25.00   54.25
  -3  -3  -9   14.33   36.69
   3   3  10  349.64   64.35
  -3  -3 -10  392.46   64.98
  -3  -3 -10  456.97   35.76
   3   3  11   48.42   40.01
  -3  -3 -11    8.68   22.60
  -3  -3 -11  -25.11   43.79
   3   3  12 1598.26  139.73
  -3  -3 -12 1534.43   84.50
  -3  -3 -12 1413.53  149.26
   3   4 -16   -3.81   70.16
   3   4 -16   47.06   49.83
  -3  -4  16   36.31   58.43
   3   4 -15   56.19   70.17
   3   4 -15  138.43   51.63
  -3  -4  15  101.22   58.59
   3   4 -14   -5.17   51.33
   3   4 -14   42.41   34.55
  -3  -4  14   -2.86   22.90
  -3  -4  14  135.01   42.23
   3   4 -13   77.34   41.11
   3   4 -13   44.80   51.46
   3   4 -13   60.66   36.25
  -3  -4  13   74.43   17.46
  -3  -4  13   21.62   39.78
   3   4 -12    2.83   26.80
   3   4 -12    4.19   29.21
   3   4 -12  -37.80   41.64
  -3  -4  12   -2.38   12.36
  -3  -4  12    6.28   30.72
   3   4 -11 4271.58  207.09
   3   4 -11 4533.09  247.28
   3   4 -11 4594.70  193.96
  -3  -4  11 4835.33  152.49
  -3  -4  11 4443.84  206.05
   3   4 -10 1484.34   96.89
   3   4 -10 1332.51   65.06
   3   4 -10 1211.65   75.69
  -3  -4  10 1304.42   70.00
  -3  -4  10 1371.82   40.32
  -3  -4  10 1237.90   90.66
   3   4  -9  824.79   71.26
   3   4  -9  845.39   46.93
   3   4  -9  904.16   65.41
  -3  -4   9  888.09   27.18
  -3  -4   9  910.99   58.31
  -3  -4   9  813.07   48.07
   3   4  -8  241.53   25.83
   3   4  -8  253.25   33.10
   3   4  -8  217.81   38.24
  -3  -4   8  221.05   13.64
  -3  -4   8  244.53   30.37
  -3  -4   8  249.58   27.19
   3   4  -7  484.47   31.52
   3   4  -7  478.22   32.75
   3   4  -7  540.33   39.91
  -3  -4   7  515.00   17.98
  -3  -4   7  538.80   30.42
   3   4  -6 2249.65   81.45
   3   4  -6 2155.38   87.67
   3   4  -6 2117.71   91.12
  -3  -4   6 2315.28   92.07
  -3  -4   6 2096.45   69.98
  -3  -4   6 2117.02   78.51
   3   4  -525655.44 1665.56
   3   4  -4 1577.71   52.94
   3   4  -4 1732.32   82.35
   3   4  -4 1534.62   53.86
  -3  -4   4 1607.56   64.75
  -3  -4   4 1525.32   48.86
  -3  -4   4 1522.46   53.32
   3   4  -3 2722.46   78.61
   3   4  -3 2753.20   85.31
   3   4  -3 2717.68  141.60
  -3  -4   3 2604.88   77.85
  -3  -4   3 2731.56   79.43
  -3  -4   3 2623.48  103.69
   3   4  -2  166.78   33.33
   3   4  -2  157.45   12.68
   3   4  -2  149.33   16.14
  -3  -4   2  107.28   10.77
  -3  -4   2  218.23   12.76
  -3  -4   2  146.70   27.28
   3   4  -1 5282.07  153.54
   3   4  -1 5272.67  162.72
   3   4  -1 5233.83  226.00
  -3  -4   1 5190.36  212.18
  -3  -4   1 5214.86  158.67
  -3  -4   1 5317.89  151.19
   3   4   030176.16 2061.20
  -3  -4   029109.04 1981.75
   3   4   1  762.01   27.98
   3   4   1  827.86   56.14
  -3  -4  -1  746.58   24.66
  -3  -4  -1  862.36   42.53
  -3  -4  -1  800.21   28.64
  -3  -4  -1  847.95   51.87
   3   4   212703.96  642.39
   3   4   212685.46  535.27
  -3  -4  -212199.09  570.90
  -3  -4  -212451.32  510.19
  -3  -4  -212011.13  650.00
   3   4   3 1228.70   73.09
   3   4   3 1460.43   46.06
  -3  -4  -3 1357.06   43.98
  -3  -4  -3 1429.97   93.79
  -3  -4  -3 1344.38   43.77
  -3  -4  -3 1554.23   65.38
   3   4   4 1097.56   38.68
   3   4   4 1246.76   59.17
   3   4   4 1100.01   80.77
  -3  -4  -4 1190.83   91.45
  -3  -4  -4 1238.86   41.79
  -3  -4  -4 1126.25   60.98
   3   4   5 1624.75   55.54
   3   4   5 1746.38   87.58
   3   4   5 1607.07   85.51
  -3  -4  -5 1677.82   56.79
  -3  -4  -5 1784.60  105.82
  -3  -4  -5 1806.45   89.00
   3   4   6  632.40   65.24
   3   4   6  646.08   63.72
   3   4   6  637.91   33.26
  -3  -4  -6  554.25   86.55
  -3  -4  -6  567.05   31.34
  -3  -4  -6  650.70   53.75
   3   4   7 2134.54  135.96
   3   4   7 2510.10  143.30
  -3  -4  -7 2122.50   77.52
  -3  -4  -7 2033.02  169.61
  -3  -4  -7 2245.43  121.93
   3   4   8  759.08   93.69
   3   4   8  811.93   87.58
  -3  -4  -8  815.11   41.87
  -3  -4  -8  866.08   73.36
   3   4   9  131.94   64.52
   3   4   9   17.48   45.95
  -3  -4  -9   71.40   44.84
  -3  -4  -9   51.90   20.78
   3   4  10    2.84   44.12
  -3  -4 -10   21.81   27.51
  -3  -4 -10   14.84   44.31
   3   4  11   -6.79   53.77
  -3  -4 -11   36.31   24.38
  -3  -4 -11   -6.04   56.29
  -3  -4 -12  108.84   74.06
   3   5 -16  -19.80   70.88
   3   5 -16  109.01   48.14
  -3  -5  16   19.30   59.99
   3   5 -15   11.12   61.31
   3   5 -15   31.34   41.61
  -3  -5  15   76.43   52.34
   3   5 -14   64.63   51.75
   3   5 -14   32.89   45.47
   3   5 -14   74.75   38.28
  -3  -5  14   69.84   42.96
  -3  -5  14    5.06   23.50
   3   5 -13   -6.56   31.48
   3   5 -13   -8.75   44.19
   3   5 -13   -0.26   32.02
  -3  -5  13    9.06   14.46
  -3  -5  13   -9.01   33.08
   3   5 -12 1941.15  148.57
   3   5 -12 1997.69  136.18
   3   5 -12 2275.79  107.56
  -3  -5  12 2114.49   69.80
  -3  -5  12 1991.03  114.31
   3   5 -11 1041.73   86.44
   3   5 -11  833.70   65.42
   3   5 -11 1028.15   59.36
  -3  -5  11  990.34   37.35
  -3  -5  11 1178.33   69.86
   3   5 -10 1055.47   81.83
   3   5 -10  960.83   55.44
   3   5 -10 1025.57   62.08
  -3  -5  10 1011.74   33.60
  -3  -5  10 1030.40   59.62
  -3  -5  10  936.88   90.12
   3   5  -9    5.15   19.62
   3   5  -9    1.09   20.68
   3   5  -9  -22.40   32.04
  -3  -5   9   -5.90    9.58
  -3  -5   9    2.73   20.59
  -3  -5   9  -19.09   23.65
   3   5  -8  169.74   24.85
   3   5  -8  138.82   23.70
   3   5  -8  144.68   42.65
  -3  -5   8  144.89   13.81
  -3  -5   8  142.47   23.43
  -3  -5   8  109.99   27.00
   3   5  -7 2759.28   99.26
   3   5  -7 2942.95  123.76
   3   5  -7 2993.38  151.78
  -3  -5   7 2976.97  110.65
  -3  -5   7 2859.73  102.53
  -3  -5   7 2885.70  109.85
   3   5  -6  618.04   40.18
   3   5  -6  599.93   32.03
   3   5  -6  703.50   51.60
  -3  -5   6  590.33   33.93
  -3  -5   6  607.62   40.66
  -3  -5   6  623.78   33.34
   3   5  -514169.23  663.09
   3   5  -514804.33  769.66
   3   5  -514565.74  696.34
  -3  -5   513819.15  722.71
  -3  -5   513531.24  627.54
  -3  -5   514276.60  660.83
   3   5  -4  871.69   40.71
   3   5  -4  794.91   56.31
   3   5  -4  802.83   28.67
  -3  -5   4  822.49   34.97
  -3  -5   4  833.60   34.98
  -3  -5   4  760.45   45.65
   3   5  -3  480.93   22.98
   3   5  -3  496.73   46.97
   3   5  -3  454.25   24.53
  -3  -5   3  504.13   26.34
  -3  -5   3  449.73   23.22
  -3  -5   3  469.80   41.85
   3   5  -2 2141.32   61.70
   3   5  -2 2136.14   73.23
   3   5  -2 2228.15  107.08
  -3  -5   2 2186.64   62.54
  -3  -5   2 2112.56   57.53
  -3  -5   2 2260.34   96.87
   3   5  -1 2452.30   70.31
   3   5  -1 2611.74  123.08
   3   5  -1 2536.50   88.24
  -3  -5   1 2595.23   76.52
  -3  -5   1 2489.78   67.22
  -3  -5   1 2619.95  117.45
   3   5   013826.23  733.99
   3   5   013867.13  635.17
  -3  -5   013664.69  716.37
   3   5   1 9313.26  465.97
   3   5   1 9859.91  390.06
  -3  -5  -110263.72  493.62
  -3  -5  -1 9935.24  428.22
  -3  -5  -1 9841.84  364.39
  -3  -5  -1 9370.97  367.84
   3   5   2   28.85   37.72
   3   5   2    4.92   12.42
  -3  -5  -2  -16.78   20.69
  -3  -5  -2   25.45   11.00
  -3  -5  -2   20.20   12.37
  -3  -5  -2  -19.37   28.35
   3   5   3   85.39   30.73
   3   5   3   90.02   15.66
  -3  -5  -3   39.83   27.99
  -3  -5  -3  148.41   37.33
  -3  -5  -3   87.86   15.49
  -3  -5  -3   47.75   13.83
   3   5   4 3092.12  107.50
   3   5   4 2987.25  142.20
  -3  -5  -4 3110.82  104.62
  -3  -5  -4 2758.85  158.23
  -3  -5  -4 3001.53   99.76
  -3  -5  -4 3104.05  140.13
   3   5   5  143.04   23.35
   3   5   5  209.54   50.92
  -3  -5  -5  279.31   21.13
  -3  -5  -5  104.08   51.24
  -3  -5  -5   90.46   39.61
   3   5   6 7254.49  369.40
   3   5   6 7334.11  364.36
  -3  -5  -6 7323.88  291.85
  -3  -5  -6 8126.05  395.77
  -3  -5  -6 7433.32  474.64
   3   5   7  381.56   65.34
   3   5   7  409.27   73.94
  -3  -5  -7  482.64   32.89
  -3  -5  -7  444.28   65.85
   3   5   8  -10.74   50.96
   3   5   8  -10.77   33.99
  -3  -5  -8    7.16   17.94
  -3  -5  -8    7.60   38.93
   3   5   9   20.36   45.69
  -3  -5  -9   13.52   20.57
  -3  -5  -9   -0.49   43.48
   3   5  10   91.83   45.23
  -3  -5 -10   43.38   27.58
  -3  -5 -10  150.11   58.43
   3   5  11  259.89   67.90
  -3  -5 -11  345.71   42.01
  -3  -5 -11  260.61   94.62
   3   6 -16   29.03   43.80
   3   6 -16  -21.39   65.83
  -3  -6  16   26.24   53.44
   3   6 -15   65.50   44.59
   3   6 -15   78.71   63.60
  -3  -6  15   14.20   51.22
   3   6 -14   68.33   47.99
   3   6 -14  293.05   55.10
   3   6 -14  383.48   60.84
  -3  -6  14   -4.48   24.11
  -3  -6  14  110.74   50.95
   3   6 -13  334.77   43.11
   3   6 -13  242.17   43.65
   3   6 -13  268.03   67.76
  -3  -6  13  160.27   24.53
  -3  -6  13  262.26   50.51
   3   6 -12 4121.27  193.62
   3   6 -12 4080.53  179.49
   3   6 -12 3588.85  238.11
  -3  -6  12 3868.40  136.46
  -3  -6  12 4020.83  196.38
   3   6 -11 1295.95   65.60
   3   6 -11 1147.59   69.20
   3   6 -11 1291.07   99.30
  -3  -6  11 1099.41   43.96
  -3  -6  11 1106.90   76.42
   3   6 -10  527.76   38.19
   3   6 -10  455.06   39.68
   3   6 -10  341.49   62.49
  -3  -6  10  371.09   23.09
  -3  -6  10  420.98   40.37
  -3  -6  10  339.82   61.91
   3   6  -9 1852.68   78.35
   3   6  -9 1649.69   75.63
   3   6  -9 1740.13  114.19
  -3  -6   9 1646.47   81.02
  -3  -6   9 1668.78   56.67
  -3  -6   9 1823.26  105.68
   3   6  -8 2427.00   95.89
   3   6  -8 2391.33  117.87
   3   6  -8 2275.71  137.30
  -3  -6   8 2320.77   95.24
  -3  -6   8 2417.13  104.25
   3   6  -713713.96  701.07
   3   6  -713822.03  666.69
   3   6  -714435.13  767.46
  -3  -6   713493.01  704.55
  -3  -6   714108.15  684.62
  -3  -6   713424.77  645.67
   3   6  -6 4528.46  232.94
   3   6  -6 4306.58  164.15
   3   6  -6 4311.97  177.60
  -3  -6   6 4395.26  200.43
  -3  -6   6 4545.85  177.21
  -3  -6   6 4426.53  163.27
   3   6  -5 1341.20   84.88
   3   6  -5 1343.22   47.46
   3   6  -5 1487.20   66.20
  -3  -6   5 1320.86   56.02
  -3  -6   5 1457.09   70.70
  -3  -6   5 1394.92   48.48
   3   6  -4   98.79   17.96
   3   6  -4   66.43   34.65
   3   6  -4  103.76   24.10
  -3  -6   4   71.96   16.83
  -3  -6   4   88.68   19.78
  -3  -6   4   72.84   27.91
   3   6  -3 3006.22   95.95
   3   6  -3 2948.01  142.22
   3   6  -3 3050.00  114.25
  -3  -6   3 2926.46   90.57
  -3  -6   3 3047.53   93.61
  -3  -6   3 2933.94  132.42
   3   6  -2 2827.23   90.84
   3   6  -2 2812.05   94.72
   3   6  -2 3130.04  151.51
  -3  -6   2 2782.39   97.43
  -3  -6   2 2845.68  133.25
  -3  -6   2 2951.00   87.39
   3   6  -118319.24 1100.47
   3   6  -119437.05  995.66
  -3  -6   117203.33 1029.14
   3   6   0  715.73   64.47
   3   6   0  837.68   36.27
  -3  -6   0  849.82   48.59
  -3  -6   0  809.90   30.21
  -3  -6   0  804.67   80.20
  -3  -6   0  853.51   33.87
   3   6   1 3101.27  156.23
   3   6   1 3290.87  110.93
  -3  -6  -1 3262.43   98.56
  -3  -6  -1 3247.93  114.22
  -3  -6  -1 3425.62  141.58
  -3  -6  -1 3229.30  163.31
   3   6   2    9.56   30.46
   3   6   2    5.62   14.40
  -3  -6  -2   22.27   26.47
  -3  -6  -2    9.58   14.18
  -3  -6  -2   39.39   42.34
  -3  -6  -2   20.88   13.75
   3   6   3  199.25   37.45
   3   6   3  116.06   19.82
  -3  -6  -3  167.83   37.00
  -3  -6  -3   86.60   18.73
  -3  -6  -3  141.28   44.32
  -3  -6  -3   93.31   22.93
   3   6   4  158.35   30.38
   3   6   4   98.52   40.92
  -3  -6  -4  149.39   39.25
  -3  -6  -4  123.68   22.60
  -3  -6  -4  151.88   25.57
  -3  -6  -4  111.28   49.26
   3   6   5  148.96   53.24
  -3  -6  -5  176.04   27.69
  -3  -6  -5  133.36   21.90
  -3  -6  -5  187.10   46.25
   3   6   6 2892.62  189.33
  -3  -6  -6 2927.51  126.47
  -3  -6  -6 2565.88   99.96
  -3  -6  -6 3103.79  180.35
   3   6   7  509.87   71.49
  -3  -6  -7  682.17   61.99
  -3  -6  -7  728.87   41.59
  -3  -6  -7  817.54   87.25
   3   6   8  -29.91   52.16
  -3  -6  -8  -22.87   26.58
  -3  -6  -8  -29.04   48.42
   3   6   9   48.29   61.36
  -3  -6  -9   51.30   32.73
  -3  -6  -9   67.47   58.04
   3   6  10   -3.29   56.56
  -3  -6 -10  -11.41   32.13
  -3  -6 -10   13.49   58.61
   3   7 -16   23.20   71.28
   3   7 -16   49.25   46.40
  -3  -7  16   12.70   53.48
   3   7 -15    4.63   37.57
   3   7 -15   36.52   61.72
  -3  -7  15   14.42   46.96
   3   7 -14   17.43   46.20
   3   7 -14   81.69   43.83
   3   7 -14  372.03   66.85
  -3  -7  14  185.42   53.30
   3   7 -13  818.76   64.23
   3   7 -13  694.59   66.10
   3   7 -13  804.98   97.03
  -3  -7  13  677.04   43.38
  -3  -7  13  783.83   74.02
   3   7 -12 1330.23   84.96
   3   7 -12 1374.30   77.78
   3   7 -12 1210.85  121.24
  -3  -7  12 1185.60   51.85
  -3  -7  12 1306.85   88.56
   3   7 -11  545.97   45.03
   3   7 -11  340.68   57.85
   3   7 -11  420.53   84.11
  -3  -7  11  589.65   31.88
  -3  -7  11  578.95   53.24
   3   7 -10   -6.48   21.69
   3   7 -10   64.24   39.63
   3   7 -10    0.00   21.71
  -3  -7  10   -2.45   15.83
  -3  -7  10   35.10   25.70
  -3  -7  10  -14.76   37.93
   3   7  -9  181.20   29.68
   3   7  -9  265.95   53.27
   3   7  -9  228.88   30.32
  -3  -7   9  211.74   35.12
  -3  -7   9  162.82   22.06
  -3  -7   9  222.67   35.79
   3   7  -8  213.41   44.95
   3   7  -8  287.52   36.77
   3   7  -8  234.40   57.23
  -3  -7   8  188.66   44.44
  -3  -7   8  264.57   31.45
  -3  -7   8  253.13   32.52
   3   7  -7   58.35   24.65
   3   7  -7   14.60   43.19
   3   7  -7   30.17   33.76
  -3  -7   7   58.02   35.08
  -3  -7   7   27.45   21.63
  -3  -7   7   71.20   23.60
   3   7  -610664.17  607.87
   3   7  -6 9259.46  482.72
   3   7  -610462.20  454.89
  -3  -7   611394.05  502.65
  -3  -7   611594.23  497.36
  -3  -7   610794.52  552.50
   3   7  -5   65.55   37.70
   3   7  -5   58.52   16.11
   3   7  -5   67.89   28.98
  -3  -7   5   75.83   17.26
  -3  -7   5   61.13   19.53
  -3  -7   5   88.17   30.33
   3   7  -4  787.07   38.64
   3   7  -4  869.19   84.41
   3   7  -4  747.06   51.18
  -3  -7   4  803.55   32.38
  -3  -7   4  739.11   33.31
  -3  -7   4  790.46   58.78
   3   7  -3  358.81   35.16
   3   7  -3  301.77   25.13
   3   7  -3  366.87   59.43
  -3  -7   3  315.54   21.84
  -3  -7   3  311.69   22.58
  -3  -7   3  250.42   43.51
   3   7  -2 5012.50  177.48
   3   7  -2 4733.06  267.27
   3   7  -2 4979.76  187.05
  -3  -7   2 5140.26  179.29
  -3  -7   2 5051.65  171.01
  -3  -7   2 5024.73  271.40
   3   7  -1 2998.17  155.61
   3   7  -1 3229.81  117.04
   3   7  -1 3093.06  110.56
  -3  -7   1 2971.12  156.64
  -3  -7   1 3074.81   99.02
  -3  -7   1 3113.97  117.67
   3   7   0 9220.35  394.91
   3   7   0 9932.53  546.32
  -3  -7   0 9635.62  445.80
  -3  -7   0 9022.94  359.95
  -3  -7   0 9217.97  485.62
  -3  -7   0 9399.15  398.82
   3   7   1 1380.93  110.26
   3   7   1 1388.11   56.94
  -3  -7  -1 1362.84   52.72
  -3  -7  -1 1470.29   82.42
  -3  -7  -1 1319.41   96.71
  -3  -7  -1 1354.89   48.06
   3   7   2  936.64   74.33
   3   7   2  914.47   44.13
  -3  -7  -2  819.27   68.34
  -3  -7  -2  940.54   48.95
  -3  -7  -2  852.50   39.42
  -3  -7  -2  792.81   86.49
   3   7   3  937.13   90.73
  -3  -7  -3  929.82   74.16
  -3  -7  -3  750.86   90.66
  -3  -7  -3  941.07   43.52
  -3  -7  -3  865.87   39.91
   3   7   4 5165.00  311.49
  -3  -7  -4 5359.85  285.17
  -3  -7  -4 5800.87  226.93
  -3  -7  -4 5169.31  198.41
   3   7   5  954.94   81.34
  -3  -7  -5 1106.79   63.10
  -3  -7  -5  970.43   51.07
  -3  -7  -5 1068.04   93.53
   3   7   6   25.83   52.79
  -3  -7  -6   31.15   34.51
  -3  -7  -6   56.94   21.04
  -3  -7  -6   35.95   49.61
   3   7   7  229.11   71.51
  -3  -7  -7   10.75   51.50
  -3  -7  -7  273.04   29.88
  -3  -7  -7  197.96   64.12
   3   7   8  284.76   81.18
  -3  -7  -8  205.07   76.63
  -3  -7  -8  228.13   40.67
   3   7   9   53.71   49.51
  -3  -7  -9   -3.06   24.54
  -3  -7  -9   24.75   60.47
  -3  -8  16   50.42   57.25
   3   8 -15   23.93   47.61
   3   8 -15   13.90   58.16
  -3  -8  15  -25.15   46.23
   3   8 -14  -13.68   33.79
   3   8 -14   16.14   59.36
  -3  -8  14   49.24   43.16
   3   8 -13 2410.77  168.41
   3   8 -13 2566.67  201.00
  -3  -8  13 2678.62  153.72
   3   8 -12   27.29   35.52
   3   8 -12   17.41   51.11
   3   8 -12   -7.88   27.85
  -3  -8  12    3.02   19.68
  -3  -8  12   -2.16   32.65
   3   8 -11  388.90   43.16
   3   8 -11  399.35   41.84
   3   8 -11  304.22   78.15
  -3  -8  11  365.47   30.52
  -3  -8  11  450.49   49.90
   3   8 -10  235.05   35.19
   3   8 -10  256.49   31.60
   3   8 -10  153.19   62.39
  -3  -8  10  196.43   40.77
  -3  -8  10  152.61   26.88
   3   8  -9   62.95   22.34
   3   8  -9   -5.78   48.30
   3   8  -9   31.01   41.14
  -3  -8   9   25.29   28.09
  -3  -8   9   15.21   33.94
  -3  -8   9   -9.77   29.43
   3   8  -8  819.02   94.21
   3   8  -8  773.71   73.21
   3   8  -8  756.99   45.95
  -3  -8   8  794.80   59.17
  -3  -8   8  723.60   51.49
  -3  -8   8  882.05   53.84
   3   8  -7 6150.33  348.47
   3   8  -7 5804.28  231.46
   3   8  -7 6085.28  297.45
  -3  -8   7 6051.40  311.98
  -3  -8   7 5908.82  239.56
  -3  -8   7 5664.27  225.95
   3   8  -6 2520.36  103.87
   3   8  -6 2636.93  117.69
   3   8  -6 2426.46  164.49
  -3  -8   6 2516.27   92.03
  -3  -8   6 2561.16   93.14
  -3  -8   6 2207.64  139.06
   3   8  -5  352.91   31.76
   3   8  -5  429.19   70.79
   3   8  -5  372.75   49.70
  -3  -8   5  354.55   28.06
  -3  -8   5  295.09   30.94
  -3  -8   5  362.93   48.03
   3   8  -4   67.97   38.76
   3   8  -4   30.55   22.69
   3   8  -4   25.32   20.50
  -3  -8   4   45.83   17.95
  -3  -8   4   56.37   19.86
  -3  -8   4   72.29   36.94
   3   8  -3  331.14   67.13
   3   8  -3  248.13   32.26
   3   8  -3  324.99   29.27
  -3  -8   3  405.26   31.67
  -3  -8   3  254.25   24.81
  -3  -8   3  288.16   47.44
   3   8  -2 1780.84   72.74
   3   8  -2 1810.81  110.23
   3   8  -2 1715.59   73.17
  -3  -8   2 1775.52   67.49
  -3  -8   2 1805.13   66.48
  -3  -8   2 1643.63  106.60
   3   8  -1  806.39   45.20
   3   8  -1  719.54   49.22
   3   8  -1  878.02   79.48
  -3  -8   1  752.34   48.82
  -3  -8   1  763.79   37.37
  -3  -8   1  863.63   81.40
   3   8   0 4371.10  270.51
   3   8   0 4230.02  173.30
  -3  -8   0 4595.88  214.61
  -3  -8   0 4598.52  161.01
  -3  -8   0 4383.52  176.62
  -3  -8   0 4378.23  256.19
   3   8   1    3.44   43.33
   3   8   1   16.23   19.32
  -3  -8  -1   26.37   32.29
  -3  -8  -1   -5.98   38.03
  -3  -8  -1   -3.77   15.64
  -3  -8  -1   -3.91   15.82
   3   8   2   39.96   35.90
  -3  -8  -2   10.74   38.56
  -3  -8  -2   31.25   22.73
  -3  -8  -2   22.88   19.60
   3   8   3  126.02   57.86
  -3  -8  -3   94.80   51.04
  -3  -8  -3  129.19   21.57
  -3  -8  -3  126.38   26.02
   3   8   4   14.49   40.68
  -3  -8  -4   10.86   23.11
  -3  -8  -4   12.28   18.24
  -3  -8  -4   24.08   45.76
   3   8   5 2248.76  158.46
  -3  -8  -5 2557.01  128.24
  -3  -8  -5 2655.97  105.58
  -3  -8  -5 2666.85  184.67
   3   8   6   91.26   62.09
  -3  -8  -6   10.85   36.18
  -3  -8  -6   31.91   24.23
  -3  -8  -6   64.21   54.60
   3   8   7   -2.32   48.56
  -3  -8  -7   53.32   25.46
  -3  -8  -7   28.16   62.96
   3   8   8   36.75   46.90
  -3  -8  -8  -13.79   31.31
  -3  -8  -8   -1.43   56.48
   3   9 -15   62.09   45.97
   3   9 -15   13.98   80.12
  -3  -9  15  277.38   63.43
   3   9 -14   50.37   42.90
   3   9 -14  -16.36   65.29
  -3  -9  14  143.86   50.27
   3   9 -13  701.58   61.88
   3   9 -13  435.63   99.43
  -3  -9  13  515.48   72.04
   3   9 -12  493.61   56.65
   3   9 -12  428.65   50.52
   3   9 -12  451.26   88.19
  -3  -9  12  514.85   61.88
   3   9 -11   14.00   28.79
   3   9 -11   12.57   32.09
   3   9 -11   67.88   55.75
  -3  -9  11   73.53   32.11
  -3  -9  11    9.25   26.09
   3   9 -10  482.66   57.27
   3   9 -10  452.62   86.21
  -3  -9  10  513.40   63.37
  -3  -9  10  548.81   54.65
   3   9  -9 1105.37   75.23
   3   9  -9 1416.81  125.55
   3   9  -9 1333.19   93.39
  -3  -9   9 1295.61   99.90
  -3  -9   9 1329.55   81.28
   3   9  -8 3835.97  256.48
   3   9  -8 3801.23  155.64
   3   9  -8 4093.42  202.52
  -3  -9   8 4036.72  182.17
  -3  -9   8 3903.46  220.24
  -3  -9   8 3927.77  168.17
   3   9  -7 2962.17  118.53
   3   9  -7 3100.93  203.46
   3   9  -7 3187.94  180.02
  -3  -9   7 2944.83  137.76
  -3  -9   7 3074.14  184.67
  -3  -9   7 3021.43  133.88
   3   9  -6  599.61   70.09
   3   9  -6  557.31   35.30
   3   9  -6  546.98   64.21
  -3  -9   6  566.27   36.81
  -3  -9   6  452.06   81.82
  -3  -9   6  601.12   45.96
   3   9  -5  310.11   33.50
   3   9  -5  347.95   43.52
   3   9  -5  441.80   76.54
  -3  -9   5  393.10   30.73
  -3  -9   5  329.77   36.67
  -3  -9   5  388.27   55.02
   3   9  -4   61.29   29.08
   3   9  -4  120.33   54.17
   3   9  -4   44.02   24.05
  -3  -9   4   37.31   22.11
  -3  -9   4   69.52   26.48
  -3  -9   4   81.36   55.32
   3   9  -3  607.86   51.78
   3   9  -3  737.89   49.84
   3   9  -3  759.76   73.96
  -3  -9   3  705.07   40.77
  -3  -9   3  652.73   40.51
  -3  -9   3  671.80   75.63
   3   9  -221089.68 1501.34
   3   9  -220496.80 1229.87
   3   9  -221258.58 1330.81
  -3  -9   221622.70 1244.14
  -3  -9   221474.38 1223.39
  -3  -9   220727.78 1432.41
   3   9  -1   37.78   42.92
   3   9  -1   54.85   19.80
   3   9  -1   32.51   23.82
  -3  -9   1    5.86   19.24
  -3  -9   1   -3.68   19.73
  -3  -9   1  -15.79   44.51
   3   9   0  826.40   80.24
  -3  -9   0  596.41   72.63
  -3  -9   0  759.06   50.03
  -3  -9   0  714.32   42.05
   3   9   1    2.98   45.65
  -3  -9  -1   15.24   47.07
  -3  -9  -1   44.23   25.97
  -3  -9  -1   58.37   22.11
   3   9   2   37.14   41.75
  -3  -9  -2   12.00   48.66
  -3  -9  -2   53.64   20.50
  -3  -9  -2   43.45   23.56
   3   9   3   92.36   51.67
  -3  -9  -3  147.76   31.36
  -3  -9  -3  121.40   24.59
  -3  -9  -3   96.75   60.19
   3   9   4 1286.27  124.45
  -3  -9  -4 1670.22  139.29
  -3  -9  -4 1598.75   88.55
  -3  -9  -4 1550.95   71.55
   3   9   5  511.24   73.32
  -3  -9  -5  306.65   36.19
  -3  -9  -5  420.33   89.92
   3   9   6   11.31   49.87
  -3  -9  -6  -15.49   24.47
  -3  -9  -6    4.96   57.41
   3   9   7 -144.30   67.76
  -3  -9  -7   -7.83   35.43
  -3  -9  -7   32.84   72.15
   3  10 -15  233.54   73.35
   3  10 -15  238.60   94.82
  -3 -10  15  255.07   76.30
   3  10 -14  868.82  113.16
   3  10 -14  342.48   87.85
  -3 -10  14  577.82   91.61
   3  10 -13   47.03   64.37
   3  10 -13   43.10   36.73
  -3 -10  13   24.40   44.99
   3  10 -12    0.36   33.81
   3  10 -12  202.74   64.32
   3  10 -12    3.50   41.53
  -3 -10  12  123.23   42.14
   3  10 -11   57.26   41.94
   3  10 -11   35.62   64.96
   3  10 -11   73.05   31.33
  -3 -10  11   91.05   38.31
   3  10 -10   91.47   63.31
   3  10 -10   51.15   29.90
  -3 -10  10   58.00   49.94
  -3 -10  10   53.94   35.56
   3  10  -9 1978.30  174.54
   3  10  -9 1885.70   92.35
  -3 -10   9 1936.65  144.28
  -3 -10   9 2015.92  109.58
   3  10  -8   14.68   26.32
   3  10  -8  116.65   58.35
   3  10  -8   76.26   43.14
  -3 -10   8   44.12   49.88
  -3 -10   8   62.57   31.82
   3  10  -7 1232.67  128.89
   3  10  -7 1262.48   78.85
   3  10  -7 1334.53   93.99
  -3 -10   7 1254.02   79.08
  -3 -10   7 1337.87   85.02
  -3 -10   7 1282.25  124.38
   3  10  -6   94.06   38.08
   3  10  -6   78.97   61.20
   3  10  -6   92.65   24.71
  -3 -10   6   64.03   30.41
  -3 -10   6   54.71   31.69
  -3 -10   6   53.07   59.52
   3  10  -5    6.54   51.43
   3  10  -5  -12.84   32.25
   3  10  -5  -16.35   25.92
  -3 -10   5  -14.25   20.62
  -3 -10   5    1.70   24.78
  -3 -10   5    0.82   51.28
   3  10  -4  385.54   65.80
   3  10  -4  552.08   43.22
  -3 -10   4  451.27   41.09
  -3 -10   4  429.65   96.38
  -3 -10   4  448.20   37.34
   3  10  -3  600.39   98.36
   3  10  -3  708.10   54.63
  -3 -10   3  620.16   53.85
  -3 -10   3  685.55   48.01
   3  10  -2 1209.84  113.38
   3  10  -2 1396.93   80.01
  -3 -10   2 1481.36   69.91
  -3 -10   2 1278.35   73.05
   3  10  -1 1779.13  130.69
  -3 -10   1 1801.39  129.33
  -3 -10   1 1665.15   74.31
  -3 -10   1 1932.16   83.28
   3  10   0   31.62   44.23
  -3 -10   0   42.69   21.71
  -3 -10   0   26.70   50.07
  -3 -10   0   13.99   25.57
   3  10   1  104.21   69.91
  -3 -10  -1  119.32   61.10
  -3 -10  -1  189.28   35.61
  -3 -10  -1  109.41   32.43
   3  10   2   91.88   47.05
  -3 -10  -2   99.05   34.11
  -3 -10  -2  108.14   24.62
  -3 -10  -2   97.66   61.46
   3  10   3  247.60   68.56
  -3 -10  -3  349.39   83.58
  -3 -10  -3  368.65   36.03
  -3 -10  -3  289.70   55.04
   3  10   4  683.39   91.16
  -3 -10  -4  522.60  116.39
  -3 -10  -4  691.26   48.08
   3  10   5  170.73   77.73
  -3 -10  -5  397.62   41.14
  -3 -10  -5  383.38   98.87
   3  10   6   59.97   58.32
  -3 -10  -6   48.26   39.97
  -3 -10  -6   67.77   79.02
  -3 -11  15  115.36   66.25
   3  11 -14  325.23   90.56
   3  11 -14  873.53  121.57
  -3 -11  14  753.89   95.59
   3  11 -13  214.72   88.04
   3  11 -13  121.99   59.14
  -3 -11  13  235.79   57.65
   3  11 -12  -71.06   65.97
   3  11 -12  -26.19   31.70
  -3 -11  12   32.27   38.10
   3  11 -11    9.65   29.83
   3  11 -11   13.30   65.97
  -3 -11  11  -12.40   56.82
  -3 -11  11   46.97   37.45
   3  11 -10    6.95   62.46
   3  11 -10   53.34   38.89
  -3 -11  10   29.89   58.66
  -3 -11  10   18.51   28.89
   3  11  -9  315.44   84.72
   3  11  -9  246.99   49.43
  -3 -11   9  376.51   81.34
  -3 -11   9  276.23   38.09
   3  11  -8 5361.03  367.10
   3  11  -8 5251.19  263.42
  -3 -11   8 5177.28  251.17
  -3 -11   8 4813.96  326.97
   3  11  -7  337.60   90.36
   3  11  -7  376.15   45.17
  -3 -11   7  303.58   37.24
   3  11  -6  638.75  111.82
   3  11  -6  694.01   47.73
  -3 -11   6  722.17   48.58
   3  11  -5  216.01   38.26
   3  11  -5  169.86   63.70
  -3 -11   5  238.14   29.57
  -3 -11   5  222.86   31.70
   3  11  -4   87.03   35.82
   3  11  -4  102.31   48.62
  -3 -11   4   62.52   33.00
  -3 -11   4   73.47   26.53
   3  11  -3 1986.16  171.76
   3  11  -3 1746.44  101.26
  -3 -11   3 1652.19   82.50
  -3 -11   3 1712.49   87.04
   3  11  -2  861.41   91.71
   3  11  -2  742.77   69.24
  -3 -11   2  912.88   65.60
  -3 -11   2  796.51   65.57
  -3 -11   1  745.86   60.18
  -3 -11   1  811.51   91.31
  -3 -11   1  612.88   43.61
   3  11   0  151.19   65.21
  -3 -11   0  186.80   70.05
  -3 -11   0  242.61   31.06
  -3 -11   0  203.97   40.97
   3  11   1  107.91   48.98
  -3 -11  -1   31.53   60.83
  -3 -11  -1    4.19   25.01
   3  11   2  253.18   90.51
  -3 -11  -2  196.28   83.13
  -3 -11  -2  290.23   37.98
   3  11   3  193.45   73.54
  -3 -11  -3  293.05   37.46
  -3 -11  -3  208.11   95.66
   3  11   4   42.71   56.36
  -3 -11  -4   -2.31   73.87
  -3 -11  -4   49.64   36.41
  -3 -11  -5   38.48   30.18
  -3 -11  -5   22.37   83.00
   3  12 -14   36.56   62.14
  -3 -12  14  207.40   67.77
   3  12 -13   35.15   40.38
   3  12 -13   35.12   75.71
  -3 -12  13   90.64   55.69
   3  12 -12   12.45   70.15
   3  12 -12   31.17   35.68
  -3 -12  12    0.35   40.88
   3  12 -11  -23.78   65.99
   3  12 -11  -13.33   30.04
  -3 -12  11   20.82   28.97
   3  12 -10  676.81   61.59
   3  12 -10  791.41  119.29
  -3 -12  10  697.04   75.61
   3  12  -9   86.95   62.81
   3  12  -9   -9.63   30.59
  -3 -12   9   27.22   29.02
   3  12  -8  877.37   61.51
   3  12  -8  851.14  129.53
  -3 -12   8  903.23   64.69
   3  12  -7   55.32   29.58
   3  12  -7   58.43   67.41
  -3 -12   7   51.44   28.11
   3  12  -6    4.48   45.62
   3  12  -6    7.77   32.65
  -3 -12   6   -3.55   24.92
   3  12  -5   19.95   58.64
   3  12  -5   15.53   32.26
  -3 -12   5  -16.05   23.75
   3  12  -4  420.42   97.76
   3  12  -4  502.00   56.94
  -3 -12   4  295.94   53.02
   3  12  -3 1187.48  125.40
   3  12  -3 1347.64   96.76
  -3 -12   3 1292.52   73.39
   3  12  -2  624.55   87.84
  -3 -12   2  638.60   97.50
  -3 -12   2  551.48   44.09
   3  12  -1   -4.09   48.33
  -3 -12   1   14.18   29.79
  -3 -12   1  -24.48   53.61
   3  12   0    1.37   64.52
  -3 -12   0   23.96   57.35
  -3 -12   0  -10.42   23.39
   3  12   1  105.82   56.92
  -3 -12  -1   29.34   28.57
  -3 -12  -1  149.26   73.87
   3  12   2   19.23   56.97
  -3 -12  -2   33.77   78.23
  -3 -12  -2   62.49   38.90
   3  12   3 1143.41  175.33
  -3 -12  -3 1372.37  187.26
  -3 -12  -3 1323.38   80.43
   3  13 -13   -9.90   76.23
   3  13 -13  -10.93   37.38
  -3 -13  13    2.30   52.17
   3  13 -12   65.21   89.04
   3  13 -12   84.90   57.75
  -3 -13  12  147.56   57.63
   3  13 -11   98.49  104.58
   3  13 -11  218.00   60.20
  -3 -13  11  201.00   47.24
   3  13 -10  717.01  140.72
   3  13 -10  842.70   72.71
  -3 -13  10  849.56   69.57
   3  13  -9  292.19   49.97
   3  13  -9  418.34  107.08
  -3 -13   9  331.44   61.14
   3  13  -8  -10.05   65.54
   3  13  -8   13.47   31.40
  -3 -13   8   21.78   28.63
   3  13  -7  145.18   88.04
   3  13  -7  102.30   49.62
  -3 -13   7  113.59   45.64
   3  13  -6   50.47   40.86
   3  13  -6   -0.85   73.46
  -3 -13   6   50.15   29.43
   3  13  -5   44.11   79.23
   3  13  -5   55.96   46.24
  -3 -13   5   52.37   29.98
   3  13  -4 1200.45  101.69
  -3 -13   4 1196.22   75.54
   3  13  -3  -13.41   74.93
   3  13  -3   36.38   42.79
  -3 -13   3   28.56   27.86
   3  13  -2  131.49   71.41
  -3 -13   2  204.24   35.89
  -3 -13   2  232.75   86.23
   3  13  -1   16.36   57.59
  -3 -13   1  135.92   72.89
  -3 -13   1   21.20   37.71
   3  13   0   11.83   56.43
  -3 -13   0  105.77   82.17
  -3 -13   0   18.94   28.61
   3  13   1   85.79   63.67
  -3 -13  -1  130.58   82.60
  -3 -13  -1   35.46   33.53
   3  14 -11  138.65  102.94
   3  14 -11   84.03   45.09
  -3 -14  11  146.60   63.30
   3  14 -10  -14.47   85.36
   3  14 -10   70.72   49.48
  -3 -14  10    6.68   48.70
   3  14  -9  756.58  146.04
   3  14  -9  645.12   84.32
  -3 -14   9  511.32   75.29
   3  14  -8    6.37   90.23
   3  14  -8  107.03   51.47
  -3 -14   8   23.67   33.94
   3  14  -7   77.37   80.84
   3  14  -7   36.97   38.31
  -3 -14   7   41.65   31.39
   3  14  -6   46.02   92.53
   3  14  -6   51.36   52.39
  -3 -14   6  108.03   37.30
   3  14  -5  132.63   67.96
   3  14  -5  119.54   61.82
  -3 -14   5  126.27   46.90
   3  14  -4  830.82  118.67
   3  14  -4  852.73  107.17
  -3 -14   4  849.17   67.03
   3  14  -3  429.08   90.93
  -3 -14   3  620.86  122.48
  -3 -14   3  407.29   53.32
   3  14  -2   48.42   83.14
  -3 -14   2   54.77   34.52
  -3 -14   2   93.07   87.37
   3  14  -1  -54.16   67.01
  -3 -14   1   -8.46   91.04
   3  15  -8 -120.12   88.01
   3  15  -8  -11.50   56.93
  -3 -15   8   62.75   48.56
   3  15  -7   11.57   88.33
   3  15  -7   -0.68   58.99
  -3 -15   7   31.18   34.55
   3  15  -6  114.94   98.93
   3  15  -6  105.34   66.80
  -3 -15   6   48.83   37.03
   3  15  -5  366.47  100.96
   3  15  -5  239.93   89.88
  -4  15  -4  244.33   74.61
  -4  15  -5  163.56   59.59
   4 -14   0   39.12   93.48
   4 -14   0  164.91   53.83
  -4  14   0   97.94   77.65
   4 -14   1  211.95   78.58
   4 -14   1   98.30   51.14
  -4  14  -1   20.91   68.06
   4 -14   2  139.24   73.29
   4 -14   2   62.46   39.99
  -4  14  -2   71.22   61.81
   4 -14   3    4.44   37.02
  -4  14  -3   25.98   50.43
   4 -14   4 2085.98  155.16
  -4  14  -4 1804.79  138.33
  -4  14  -4 1734.53  140.87
   4 -14   5   -7.56   47.67
  -4  14  -5   15.89   53.07
  -4  14  -5   23.27   36.99
   4 -14   6   -6.58   40.23
  -4  14  -6  -18.14   31.86
  -4  14  -6  -28.87   39.75
   4 -14   7   78.92   63.27
  -4  14  -7  120.62   48.07
   4 -14   8   52.63   45.64
  -4  14  -8   30.54   44.53
   4 -14   9   87.64   59.04
  -4  14  -9  176.44   50.43
   4 -13  -3  122.23   95.74
   4 -13  -3  173.32   45.37
  -4  13   3  168.91   64.28
   4 -13  -2   27.93   81.96
   4 -13  -2   84.44   48.19
  -4  13   2   87.49   55.25
   4 -13  -1  248.87   41.31
   4 -13  -1  136.29   86.83
  -4  13   1  180.69   61.22
   4 -13   0   24.30   68.52
   4 -13   0   73.51   44.21
  -4  13   0   66.87   58.04
   4 -13   1  -59.46   52.96
   4 -13   1   34.34   40.57
  -4  13  -1   14.29   46.46
   4 -13   2  226.23   67.53
   4 -13   2  134.48   51.27
  -4  13  -2  101.44   53.49
   4 -13   3   15.99   32.66
  -4  13  -3    4.32   37.99
  -4  13  -3  -10.76   38.31
   4 -13   4  282.04   49.68
  -4  13  -4  289.70   66.88
  -4  13  -4  209.64   48.94
   4 -13   5  734.38   97.53
  -4  13  -5  948.86   76.53
  -4  13  -5  838.78   69.82
   4 -13   6   41.84   46.60
  -4  13  -6  -38.25   32.81
  -4  13  -6    7.20   25.56
   4 -13   7   13.29   43.28
  -4  13  -7   82.45   30.18
  -4  13  -7  112.11   51.77
   4 -13   8  152.90   50.45
  -4  13  -8  163.86   48.54
   4 -13   9  649.47   84.27
  -4  13  -9  701.15   73.78
   4 -13  10  870.58   96.93
  -4  13 -10  740.45  103.77
   4 -13  11   86.01   59.35
  -4  13 -11  109.03   47.29
   4 -12  -4   -9.61   97.39
   4 -12  -4   26.02   39.67
  -4  12   4   48.79   46.50
   4 -12  -3  -17.12   85.49
   4 -12  -3   28.36   28.88
  -4  12   3   27.01   58.39
   4 -12  -2 1795.02  184.18
   4 -12  -2 1951.34  120.31
   4 -12  -2 1750.24  184.65
  -4  12   2 1775.95  158.91
   4 -12  -1  -47.17   68.39
   4 -12  -1  107.23   42.75
  -4  12   1  111.36   55.35
   4 -12   0  292.87   77.23
   4 -12   0  360.25   52.20
  -4  12   0  276.44   65.65
   4 -12   1   45.00   31.03
   4 -12   1  108.05   55.52
  -4  12  -1   21.79   45.09
   4 -12   2  456.92   61.51
  -4  12  -2  377.82   62.81
   4 -12   3  844.54  142.40
   4 -12   3  830.53   69.48
  -4  12  -3  970.69   90.19
  -4  12  -3  897.08   74.92
   4 -12   4  361.39   91.15
   4 -12   4  335.60   50.18
  -4  12  -4  420.66   50.15
  -4  12  -4  397.61   49.09
   4 -12   5  194.13   69.61
   4 -12   5  135.21   47.05
  -4  12  -5  259.25   36.12
  -4  12  -5  198.17   45.91
   4 -12   6   36.39   32.99
   4 -12   6    6.53   48.37
  -4  12  -6   11.90   23.72
  -4  12  -6   21.16   22.92
  -4  12  -6   33.64   32.25
   4 -12   7  -11.27   34.05
  -4  12  -7   -1.99   21.00
  -4  12  -7   -4.75   27.93
   4 -12   8 1434.98  103.10
  -4  12  -8 1445.08   62.24
  -4  12  -8 1441.79   88.73
   4 -12   9   79.06   53.14
  -4  12  -9  219.43   43.84
   4 -12  10  907.68   97.23
  -4  12 -10  755.91   90.82
   4 -12  11  104.94   53.98
  -4  12 -11   60.21   41.30
   4 -12  12   25.86   56.87
  -4  12 -12   44.18   53.49
   4 -11  -6 -138.46  100.96
   4 -11  -6   42.00   35.57
  -4  11   6   30.63   46.56
   4 -11  -5  -20.73   30.79
   4 -11  -5   49.13   65.77
  -4  11   5   41.79   51.64
   4 -11  -4  516.81  134.10
   4 -11  -4  455.55   41.96
  -4  11   4  351.48   71.22
   4 -11  -3   46.61   68.85
   4 -11  -3   92.76   27.83
  -4  11   3   77.77   58.79
   4 -11  -2  384.42   92.64
   4 -11  -2  493.40   43.62
  -4  11   2  275.69   76.84
   4 -11  -1   99.46   77.96
   4 -11  -1   97.78   28.79
  -4  11   1   56.37   47.89
   4 -11   0   -4.98   60.17
   4 -11   0    2.77   25.80
  -4  11   0   79.28   40.54
   4 -11   1   64.66   61.20
   4 -11   1    8.02   26.31
  -4  11  -1   19.76   35.84
   4 -11   2  378.40  101.81
   4 -11   2  378.02   59.87
  -4  11  -2  580.06   56.27
  -4  11  -2  447.89   58.35
   4 -11   3 4949.57  324.83
   4 -11   3 4930.92  237.64
  -4  11  -3 5210.23  243.20
  -4  11  -3 4951.59  234.07
   4 -11   4  639.16   53.69
   4 -11   4  583.06   84.65
  -4  11  -4  629.30   53.08
  -4  11  -4  451.14   49.40
   4 -11   5  141.93   50.14
   4 -11   5  188.93   37.41
  -4  11  -5  144.79   33.62
  -4  11  -5   60.49   30.94
   4 -11   6   78.92   38.38
   4 -11   6   25.07   32.08
  -4  11  -6   10.46   17.90
  -4  11  -6  -36.21   34.70
   4 -11   7   11.72   33.10
   4 -11   7   14.58   31.70
  -4  11  -7   10.14   17.28
  -4  11  -7   -0.96   28.79
   4 -11   8 1188.15   66.80
   4 -11   8 1301.82   91.94
  -4  11  -8 1184.16   47.35
  -4  11  -8 1149.26   77.69
   4 -11   9 2269.41  148.67
  -4  11  -9 2369.80  147.28
   4 -11  10   27.04   43.76
  -4  11 -10   11.49   32.67
   4 -11  11  -14.70   43.48
  -4  11 -11   41.10   46.28
   4 -11  12   -9.39   53.60
  -4  11 -12  -18.67   46.20
   4 -11  13  263.48   85.70
  -4  11 -13  202.48   57.34
   4 -10  -7  186.63  102.98
   4 -10  -7   58.29   37.19
  -4  10   7   88.02   52.20
   4 -10  -6  419.31  107.57
   4 -10  -6  501.04   53.94
  -4  10   6  460.00   70.78
   4 -10  -5   99.53   90.39
   4 -10  -5   69.76   33.82
  -4  10   5   88.48   44.19
   4 -10  -4  929.20  129.10
   4 -10  -4 1046.76   66.41
  -4  10   4 1006.42  109.18
   4 -10  -3  146.69   65.05
   4 -10  -3  236.81   29.59
  -4  10   3   84.77   46.08
   4 -10  -2  294.07   71.39
   4 -10  -2  274.77   34.27
  -4  10   2  253.60   44.65
   4 -10  -1   20.41   22.50
   4 -10  -1  -54.85   56.40
  -4  10   1   16.61   28.19
   4 -10   0  103.61   51.59
   4 -10   0   67.19   32.41
   4 -10   0   37.04   57.33
  -4  10   0   77.07   38.03
   4 -10   1  230.82   52.47
   4 -10   1  217.11   35.26
  -4  10  -1  305.42   46.88
   4 -10   2 5663.99  319.18
   4 -10   2 5395.89  237.73
  -4  10  -2 5066.56  233.97
  -4  10  -2 5406.41  246.52
   4 -10   3  304.61   38.68
   4 -10   3  401.99   63.07
  -4  10  -3  299.44   49.40
  -4  10  -3  242.45   34.87
   4 -10   4  286.98   54.10
   4 -10   4  219.55   54.84
  -4  10  -4  346.49   45.49
  -4  10  -4  250.08   29.93
   4 -10   5   18.46   31.47
   4 -10   5   18.11   28.24
  -4  10  -5   33.01   25.99
  -4  10  -5  -15.83   15.94
   4 -10   6   42.85   33.83
   4 -10   6   31.66   32.72
  -4  10  -6   31.48   18.88
  -4  10  -6   35.35   26.50
   4 -10   7 2661.46  169.16
   4 -10   7 2744.19  121.86
  -4  10  -7 2444.08   84.76
  -4  10  -7 2686.11  125.74
   4 -10   8   -0.03   14.72
   4 -10   8  -28.09   35.53
  -4  10  -8   34.51   27.19
  -4  10  -8  -17.43    9.87
   4 -10   9 1371.77   99.67
  -4  10  -9 1333.51   80.70
   4 -10  10  214.34   76.32
  -4  10 -10  147.57   48.12
   4 -10  11  -25.70   44.83
  -4  10 -11  -10.60   32.18
   4 -10  12   29.95   69.82
  -4  10 -12   51.51   36.13
   4 -10  13  173.36   73.69
  -4  10 -13  140.58   47.87
   4  -9  -8   96.97   67.98
   4  -9  -8   25.58   29.11
  -4   9   8  -31.66   43.70
   4  -9  -7   43.23   82.42
   4  -9  -7   27.85   28.24
  -4   9   7   53.67   44.03
   4  -9  -6  561.02  112.27
   4  -9  -6  288.14   36.42
  -4   9   6  211.19   53.44
   4  -9  -5  130.57   30.98
   4  -9  -5  140.54   68.97
  -4   9   5  116.71   44.74
   4  -9  -4  136.12   61.01
   4  -9  -4   76.34   27.62
  -4   9   4  120.27   40.09
   4  -9  -3 2001.28   81.71
   4  -9  -3 2108.72  161.68
  -4   9   3 2138.16  135.61
  -4   9   3 2072.75  137.26
   4  -9  -2   31.83   39.28
   4  -9  -2   -3.67   18.53
  -4   9   2   -4.05   24.58
  -4   9   2   -2.59   34.91
   4  -9  -1  859.28   77.24
   4  -9  -1  826.79   45.38
   4  -9  -1  865.72   83.37
  -4   9   1  825.40   68.68
  -4   9   1  984.61   84.60
   4  -9   0 1189.07   94.02
   4  -9   0 1119.69  111.04
   4  -9   0 1287.42   61.75
  -4   9   0 1267.68   77.23
  -4   9   0 1208.93   80.06
   4  -9   1  316.87   36.89
   4  -9   1  398.65   63.40
   4  -9   1  322.08   33.09
  -4   9  -1  392.67   42.57
  -4   9  -1  296.74   38.98
  -4   9  -1  399.67   60.07
   4  -9   2 3431.04  178.48
   4  -9   2 3092.55  121.68
   4  -9   2 3268.43  139.98
  -4   9  -2 3505.99  196.47
  -4   9  -2 3293.63  138.52
  -4   9  -2 3080.31  140.72
   4  -9   3 3812.01  184.36
   4  -9   3 3552.42  140.42
   4  -9   3 3594.86  159.45
  -4   9  -3 3626.08  152.36
  -4   9  -3 3633.70  182.98
  -4   9  -3 3512.07  136.67
   4  -9   4   42.61   28.11
   4  -9   4   33.85   21.69
   4  -9   4   13.66   30.84
  -4   9  -4   42.70   33.87
  -4   9  -4   16.01   23.46
  -4   9  -4   25.50   17.88
   4  -9   5  970.32   51.03
   4  -9   5 1163.63   75.16
   4  -9   5 1130.03   71.08
  -4   9  -5 1017.79   90.57
  -4   9  -5 1085.29   45.16
  -4   9  -5 1212.25   60.22
   4  -9   6  207.66   41.26
   4  -9   6  231.49   32.79
  -4   9  -6  167.39   18.51
  -4   9  -6  163.72   29.35
   4  -9   7 4477.64  147.47
   4  -9   7 4312.68  248.32
  -4   9  -7 4457.16  205.05
  -4   9  -7 4405.36  128.00
   4  -9   8 2435.93  142.29
  -4   9  -8 2364.93  106.20
   4  -9   9  100.07   46.42
  -4   9  -9   85.51   30.94
   4  -9  10   -5.81   43.47
  -4   9 -10   19.25   33.47
   4  -9  11   65.33   55.31
  -4   9 -11   87.99   31.87
   4  -9  12  -14.67   53.10
  -4   9 -12   44.82   41.12
   4  -9  13 2794.75  225.98
  -4   9 -13 2755.55  155.21
   4  -9  14   39.43   64.63
  -4   9 -14   26.44   40.06
   4  -8 -10  252.68   41.46
   4  -8 -10  144.21  131.74
   4  -8  -9    7.93   25.69
   4  -8  -9  -30.63   68.21
  -4   8   9 -127.60   43.18
   4  -8  -8  257.68   33.86
   4  -8  -8  271.23   83.61
  -4   8   8  253.16   53.98
   4  -8  -7  -55.30   50.81
   4  -8  -7    1.42   19.87
  -4   8   7    9.32   31.31
   4  -8  -6  163.03   73.50
   4  -8  -6  237.18   29.92
  -4   8   6  159.19   52.07
  -4   8   6  162.97   47.55
   4  -8  -5  564.33   87.14
   4  -8  -5  653.30   46.21
  -4   8   5  666.09   61.58
  -4   8   5  743.24   68.70
   4  -8  -4 2493.98  172.12
   4  -8  -4 2744.46  114.87
  -4   8   4 2430.16  125.01
  -4   8   4 2762.64  138.37
   4  -8  -3  178.49   48.10
   4  -8  -3  195.40   57.92
   4  -8  -3   87.18   29.07
  -4   8   3  180.62   42.81
  -4   8   3  222.40   42.28
   4  -8  -2   41.13   44.89
   4  -8  -2   -6.50   52.29
   4  -8  -2   50.29   23.22
   4  -8  -2   23.47   23.62
  -4   8   2   38.59   36.07
  -4   8   2   46.00   34.22
   4  -8  -1   10.06   28.42
   4  -8  -1   41.97   35.15
   4  -8  -1   -7.10   20.68
   4  -8  -1   22.55   22.76
  -4   8   1   -3.07   22.11
  -4   8   1   11.07   33.75
   4  -8   0 1526.99   94.25
   4  -8   0 1370.98  115.43
   4  -8   0 1395.83   59.91
   4  -8   0 1297.47   60.18
  -4   8   0 1392.12   76.15
  -4   8   0 1410.32   63.75
   4  -8   1 5019.91  244.76
   4  -8   1 5122.85  193.79
   4  -8   1 5588.93  242.75
  -4   8  -1 5082.12  216.99
  -4   8  -1 5109.88  213.02
  -4   8  -1 5089.46  234.57
   4  -8   2  638.41   47.36
   4  -8   2  712.03   37.34
   4  -8   2  720.29   61.51
  -4   8  -2  634.34   43.82
  -4   8  -2  680.86   42.25
  -4   8  -2  731.88   67.21
   4  -8   3  151.42   21.91
   4  -8   3  232.43   32.71
   4  -8   3  181.00   33.16
  -4   8  -3  149.86   27.40
  -4   8  -3  164.63   22.77
  -4   8  -3  200.39   39.64
   4  -8   4   13.58   26.05
   4  -8   4   -5.54   31.76
   4  -8   4   -5.83   17.19
  -4   8  -4   -9.11   15.78
  -4   8  -4  -12.00   19.37
  -4   8  -4   16.38   28.07
   4  -8   5   15.46   15.97
   4  -8   5    8.49   23.64
   4  -8   5   12.13   20.08
   4  -8   5   28.64   29.49
  -4   8  -5   57.93   26.98
  -4   8  -5   36.48   14.24
   4  -8   6  931.11   78.24
   4  -8   6 1067.93   51.66
   4  -8   6  907.75   52.20
   4  -8   6 1029.54   45.96
  -4   8  -6 1069.91   54.41
  -4   8  -6  998.89   30.80
   4  -8   7   53.71   26.92
   4  -8   7   78.66   36.40
  -4   8  -7   46.76   25.67
   4  -8   8 9416.80  507.27
  -4   8  -8 9561.45  442.97
   4  -8   9    7.48   36.78
  -4   8  -9    6.81   30.15
   4  -8  10   37.98   43.80
  -4   8 -10   52.40   35.49
   4  -8  11   72.35   54.99
  -4   8 -11  130.26   33.13
   4  -8  12   -4.98   73.73
  -4   8 -12   53.49   32.46
   4  -8  13  252.73  107.73
  -4   8 -13  363.45   64.54
   4  -8  14 1972.39  183.70
  -4   8 -14 1885.40  127.94
   4  -7 -10   -4.03   24.96
   4  -7 -10  113.90   63.50
  -4   7  10  -17.89   55.13
   4  -7  -9   65.21   23.44
   4  -7  -9   30.68   88.74
  -4   7   9   -0.95   40.58
   4  -7  -8   30.25   20.28
   4  -7  -8   51.74   56.93
  -4   7   8   64.39   48.17
  -4   7   8    2.16   36.06
   4  -7  -7   93.10   55.53
   4  -7  -7  114.90   23.64
  -4   7   7  111.23   37.45
  -4   7   7   83.34   36.99
   4  -7  -6 1345.88  126.67
   4  -7  -6 1398.50   62.45
  -4   7   6 1398.44   86.91
  -4   7   6 1260.64  102.87
   4  -7  -5 2018.00  137.50
   4  -7  -5 1774.12   71.96
  -4   7   5 1658.58   95.44
  -4   7   5 1861.76   94.80
   4  -7  -4  598.73   78.28
   4  -7  -4  645.01   41.49
   4  -7  -4  810.99   51.69
   4  -7  -4  626.10   65.95
  -4   7   4  622.50   52.61
  -4   7   4  781.99   56.10
   4  -7  -3 1541.00  109.44
   4  -7  -3 1557.77   72.68
   4  -7  -3 1502.52   63.02
   4  -7  -3 1572.70  109.80
  -4   7   3 1582.13   78.16
  -4   7   3 1678.79   85.41
   4  -7  -2   50.25   32.41
   4  -7  -2    6.59   19.45
   4  -7  -2    2.37   17.78
   4  -7  -2   20.03   34.07
  -4   7   2    5.89   21.13
  -4   7   2   20.88   26.17
   4  -7  -1  572.23   43.06
   4  -7  -1  526.93   58.10
   4  -7  -1  590.67   33.65
   4  -7  -1  571.92   33.52
  -4   7   1  514.12   38.50
  -4   7   1  592.30   40.20
   4  -7   0  306.78   44.32
   4  -7   0  369.70   25.59
   4  -7   0  270.30   28.10
  -4   7   0  317.94   34.83
  -4   7   0  307.73   33.04
   4  -7   119367.56 1085.65
   4  -7   118278.71  990.44
   4  -7   118420.50 1012.05
  -4   7  -117879.43  968.47
  -4   7  -117752.42  979.46
  -4   7  -118703.80 1086.31
   4  -7   2  264.72   22.64
   4  -7   2  244.23   33.50
   4  -7   2  237.54   30.57
  -4   7  -2  290.74   25.84
  -4   7  -2  254.37   27.27
  -4   7  -2  198.84   33.69
   4  -7   3 1798.70   86.56
   4  -7   3 1667.39   71.76
   4  -7   3 1835.74   79.83
  -4   7  -3 1887.14  105.79
  -4   7  -3 1710.75   69.68
  -4   7  -3 1791.92   58.66
   4  -7   4  187.35   30.74
   4  -7   4  264.48   45.19
   4  -7   4  248.27   22.42
  -4   7  -4  317.04   20.04
  -4   7  -4  216.82   25.65
   4  -7   5  168.57   36.59
   4  -7   5  173.49   18.57
   4  -7   5  183.03   29.24
   4  -7   5  138.94   22.51
  -4   7  -5  183.87   30.04
  -4   7  -5  144.29   13.13
   4  -7   6 3246.70  109.18
   4  -7   6 3491.81  127.64
   4  -7   6 3379.47  180.86
  -4   7  -6 3474.97  130.79
   4  -7   716057.20  802.58
   4  -7   715775.25  939.85
   4  -7   716671.92  883.23
  -4   7  -716386.50  880.19
   4  -7   8 3569.99  188.87
   4  -7   8 3535.29  154.43
  -4   7  -8 3480.59  140.34
   4  -7   9  322.96   74.46
  -4   7  -9  351.70   33.12
   4  -7  10   40.04   43.79
  -4   7 -10   15.04   23.68
   4  -7  11  496.21   79.41
  -4   7 -11  521.86   47.02
   4  -7  12 1623.57  178.44
  -4   7 -12 1605.06   91.30
   4  -7  13   35.12   58.64
  -4   7 -13   40.22   36.10
   4  -7  14  503.06  126.33
  -4   7 -14  390.29   60.53
   4  -6 -11   71.50   27.63
   4  -6 -11  189.12   96.50
  -4   6  11   78.31   67.26
   4  -6 -10  157.78   28.37
   4  -6 -10   95.60   74.00
  -4   6  10  218.99   64.80
   4  -6  -9   -0.95   17.30
   4  -6  -9   38.86   49.85
  -4   6   9   82.26   45.93
  -4   6   9  -21.04   35.60
   4  -6  -8    1.81   16.43
   4  -6  -8   43.01   56.66
  -4   6   8   40.77   38.05
  -4   6   8  -48.89   25.96
   4  -6  -7   19.66   58.74
   4  -6  -7  -10.65   16.02
  -4   6   7   25.32   24.81
  -4   6   7   31.12   28.06
   4  -6  -6 4160.34  245.07
   4  -6  -6 4398.73  157.07
  -4   6   6 4487.50  183.67
  -4   6   6 4237.20  200.64
   4  -6  -5  945.08   92.38
   4  -6  -5  918.45   57.30
   4  -6  -5 1052.66   44.79
   4  -6  -5 1037.13   71.75
  -4   6   5  945.49   58.04
  -4   6   5 1053.64   64.40
   4  -6  -4  733.86   71.23
   4  -6  -4  754.99   47.59
   4  -6  -4  700.02   56.06
   4  -6  -4  694.26   36.01
  -4   6   4  743.11   48.35
  -4   6   4  621.84   48.41
   4  -6  -3  868.35   75.54
   4  -6  -3  977.29   46.98
   4  -6  -3  926.83   58.34
   4  -6  -3  885.71   39.68
  -4   6   3  900.04   62.99
  -4   6   3 1091.40   55.31
   4  -6  -2  146.34   20.77
   4  -6  -2   88.75   22.59
   4  -6  -2  152.44   39.70
   4  -6  -2  140.07   25.42
  -4   6   2  131.29   31.20
  -4   6   2  160.93   27.18
   4  -6  -1 2103.74  111.81
   4  -6  -1 2275.33   89.00
   4  -6  -1 2070.59   85.05
   4  -6  -1 2127.52   85.73
  -4   6   1 2120.16   78.35
  -4   6   1 2082.87   80.63
   4  -6   0 2710.06   87.37
   4  -6   0 2451.87  100.48
   4  -6   0 2618.60  109.83
  -4   6   0 2643.02  100.81
  -4   6   0 2175.13   95.84
  -4   6   0 2502.88   94.87
   4  -6   1 1586.80   66.97
   4  -6   1 1606.36   56.17
   4  -6   1 1675.99   72.79
  -4   6  -1 1662.38   62.80
  -4   6  -1 1616.81   70.39
  -4   6  -1 1680.21   64.82
   4  -6   2 6567.75  271.54
   4  -6   2 6977.57  265.20
   4  -6   2 6942.81  248.47
  -4   6  -2 6869.53  287.74
  -4   6  -2 6318.91  227.50
  -4   6  -2 6595.15  251.94
   4  -6   3 1769.04   71.37
   4  -6   3 1681.30   57.38
   4  -6   3 1819.61   82.02
  -4   6  -3 1706.44   70.89
  -4   6  -3 1821.53   85.17
  -4   6  -3 1771.99   53.09
   4  -6   4  275.38   23.45
   4  -6   4  227.60   24.30
   4  -6   4  271.52   20.92
   4  -6   4  267.11   33.31
  -4   6  -4  229.55   21.84
  -4   6  -4  250.00   15.46
   4  -6   5 3707.90  119.50
   4  -6   5 4006.70  135.57
   4  -6   5 3747.93  170.42
   4  -6   5 3602.75   95.62
  -4   6  -5 3664.61  146.19
  -4   6  -5 3875.77   90.57
   4  -6   6 3801.90  125.70
   4  -6   6 3939.13  181.23
   4  -6   6 4078.98  148.16
  -4   6  -6 3965.26  142.95
   4  -6   7 1646.79   54.37
   4  -6   7 1548.09   98.57
   4  -6   7 1599.38   83.07
  -4   6  -7 1598.20   76.51
   4  -6   8 7960.43  465.16
   4  -6   8 8057.50  312.78
   4  -6   8 7874.32  376.88
  -4   6  -8 7752.52  348.35
   4  -6   9  543.05   81.43
   4  -6   9  450.50   46.04
  -4   6  -9  408.42   43.09
   4  -6  10  100.99   49.85
  -4   6 -10   70.31   26.30
   4  -6  11   57.54   51.69
  -4   6 -11   39.95   35.84
   4  -6  12 4848.00  301.15
  -4   6 -12 4483.38  209.83
   4  -6  13  150.11   70.12
  -4   6 -13  121.87   49.67
   4  -6  14  453.39  128.71
  -4   6 -14  373.45   58.50
   4  -5 -12  219.47   33.67
   4  -5 -12   95.59   85.93
  -4   5  12  286.02   79.66
   4  -5 -11  298.74   31.09
   4  -5 -11  287.83   87.28
  -4   5  11  366.57   74.56
   4  -5 -10    6.09   18.24
   4  -5 -10  168.53   55.90
  -4   5  10   66.18   38.07
  -4   5  10   36.53   32.35
   4  -5  -9   47.96   18.39
   4  -5  -9   97.07   53.85
  -4   5   9   75.90   42.95
  -4   5   9   52.68   25.38
   4  -5  -8   34.74   15.79
   4  -5  -8   20.19   45.84
  -4   5   8   63.00   24.45
  -4   5   8   53.84   30.56
   4  -5  -7  176.89   18.41
   4  -5  -7  266.91   54.51
  -4   5   7  174.46   46.58
  -4   5   7  189.24   27.93
   4  -5  -6  461.28   65.10
   4  -5  -6  379.16   24.79
   4  -5  -6  415.06   45.93
  -4   5   6  346.36   62.58
  -4   5   6  459.02   34.12
  -4   5   6  528.90   44.38
   4  -5  -5 5417.65  280.20
   4  -5  -5 5620.73  188.51
   4  -5  -5 5798.35  250.43
  -4   5   5 5526.07  263.05
  -4   5   5 5546.13  208.14
  -4   5   5 5530.37  262.69
   4  -5  -4   80.78   20.29
   4  -5  -4   56.00   24.23
   4  -5  -4   18.04   32.63
   4  -5  -4   34.46   13.34
  -4   5   4   23.73   17.44
  -4   5   4    9.18   21.26
   4  -5  -3 2932.66  129.89
   4  -5  -3 2728.71  135.62
   4  -5  -3 2855.48  103.13
   4  -5  -3 2883.67   88.63
  -4   5   3 2753.10   99.30
  -4   5   3 2845.12  106.83
   4  -5  -2  722.17   33.30
   4  -5  -2  691.86   55.98
   4  -5  -2  731.99   41.19
   4  -5  -2  738.44   34.69
  -4   5   2  805.06   40.89
  -4   5   2  725.68   36.50
   4  -5  -1 4147.58  177.91
   4  -5  -1 4143.28  148.85
   4  -5  -1 4245.23  151.03
   4  -5  -1 4075.42  135.36
  -4   5   1 4313.36  160.42
  -4   5   1 4076.40  153.92
   4  -5   015876.85  763.97
   4  -5   015960.68  783.91
   4  -5   016565.55  824.76
  -4   5   015864.52  821.58
  -4   5   015684.78  791.70
  -4   5   015805.98  769.29
   4  -5   1 8843.58  369.25
   4  -5   1 9327.60  369.95
   4  -5   1 8628.86  334.91
  -4   5  -1 9142.95  386.70
  -4   5  -1 9415.86  398.64
  -4   5  -1 9010.01  347.77
   4  -5   2 3070.13   94.33
   4  -5   2 3045.41  134.15
   4  -5   2 3336.97  111.34
  -4   5  -2 3047.93   99.82
  -4   5  -2 3146.97  120.12
  -4   5  -2 3145.23   94.92
   4  -5   3 7196.51  260.73
   4  -5   3 7270.20  260.52
   4  -5   3 7208.94  304.78
  -4   5  -3 7387.74  242.12
  -4   5  -3 7215.79  264.94
   4  -5   4  103.98   12.77
   4  -5   4   76.35   29.00
   4  -5   4   63.14   12.67
   4  -5   4  108.41   15.22
  -4   5  -4   98.05    9.54
  -4   5  -4  101.71   20.23
   4  -5   513923.22  629.54
   4  -5   515402.05  712.76
   4  -5   514191.56  768.71
  -4   5  -514397.70  689.82
   4  -5   6 3626.98  121.21
   4  -5   6 3626.62  168.68
   4  -5   6 3779.56  142.50
  -4   5  -6 3632.21  138.77
   4  -5   7  933.77   33.35
   4  -5   7  970.50   47.87
   4  -5   7  933.42   74.90
  -4   5  -7  882.02   50.18
   4  -5   8   33.92   14.23
   4  -5   8   33.27   29.01
   4  -5   8    1.12   36.80
  -4   5  -8   26.11   18.35
   4  -5   9    7.28   38.37
   4  -5   9   31.41   34.60
  -4   5  -9   45.30   27.21
   4  -5  10  537.58   71.01
   4  -5  10  477.88   73.01
  -4   5 -10  457.69   44.85
  -4   5 -11 2192.34  104.41
   4  -5  12   77.58   55.30
  -4   5 -12   41.14   31.34
   4  -5  13 1244.95  131.73
  -4   5 -13 1155.51  103.50
   4  -5  14   -2.56   70.20
  -4   5 -14   72.61   41.21
   4  -4 -13   33.09   62.95
  -4   4  13   32.82   48.70
   4  -4 -12  870.08   49.11
   4  -4 -12  655.69  161.99
  -4   4  12  850.20   92.10
   4  -4 -11   -3.82   17.56
   4  -4 -11    7.84   50.61
  -4   4  11   -7.98   36.40
  -4   4  11  -16.12   28.27
   4  -4 -10    2.52   15.19
   4  -4 -10   34.79   58.86
  -4   4  10  -18.40   31.37
  -4   4  10  -19.23   20.96
   4  -4  -9  241.19   19.66
   4  -4  -9  266.76   58.39
  -4   4   9  243.09   27.03
  -4   4   9  221.62   40.87
   4  -4  -8    6.18   12.07
   4  -4  -8    0.46   42.94
  -4   4   8   22.50   25.47
  -4   4   8   19.33   17.45
   4  -4  -7 4563.04  144.50
   4  -4  -7 4657.00  245.08
   4  -4  -7 4125.29  238.39
  -4   4   7 4279.10  240.67
  -4   4   7 4542.33  203.35
  -4   4   7 4415.03  155.79
   4  -4  -6  180.22   47.31
   4  -4  -6  113.78   34.39
   4  -4  -6  185.76   15.23
  -4   4   6  165.58   21.36
  -4   4   6  241.20   33.44
  -4   4   6  289.80   44.43
   4  -4  -5  664.07   62.53
   4  -4  -5  615.55   23.61
   4  -4  -5  669.94   43.65
  -4   4   5  585.47   34.36
  -4   4   5  655.84   40.87
   4  -4  -4  454.01   45.32
   4  -4  -4  347.72   17.84
   4  -4  -4  401.72   31.46
  -4   4   4  409.46   39.60
  -4   4   4  300.10   22.58
  -4   4   4  419.15   29.20
   4  -4  -3  825.97   61.76
   4  -4  -3  803.74   28.63
   4  -4  -3  775.21   40.87
  -4   4   3  895.48   35.99
  -4   4   3  885.87   41.64
   4  -4  -2 1745.45   86.53
   4  -4  -2 1748.02   54.04
   4  -4  -2 1639.37   56.82
   4  -4  -2 1707.65   72.78
  -4   4   2 1828.48   63.20
  -4   4   2 1811.14   62.57
   4  -4  -1 9525.52  448.19
   4  -4  -110335.26  421.22
   4  -4  -110044.82  402.67
   4  -4  -110522.03  444.84
  -4   4   110673.21  448.16
  -4   4   1 9841.44  396.06
   4  -4   017744.70  872.92
  -4   4   017916.94  934.87
   4  -4   1  500.41   26.39
   4  -4   1  527.68   24.78
   4  -4   1  553.08   39.46
  -4   4  -1  495.71   41.19
  -4   4  -1  502.42   23.05
  -4   4  -1  469.75   25.33
   4  -4   2 9377.35  422.15
   4  -4   2 9350.26  347.34
   4  -4   2 9307.39  346.52
   4  -4   2 9083.64  337.26
  -4   4  -2 9688.29  366.46
   4  -4   3  545.68   20.21
   4  -4   3  554.88   27.59
   4  -4   3  615.35   52.22
   4  -4   3  588.87   21.88
  -4   4  -3  529.73   24.59
  -4   4  -3  615.89   19.47
   4  -4   4  441.26   18.35
   4  -4   4  459.41   42.10
   4  -4   4  452.99   26.27
  -4   4  -4  446.06   22.95
   4  -4   5 3372.76   98.27
   4  -4   5 3476.47  111.21
   4  -4   5 3478.03  153.37
  -4   4  -5 3301.89  105.52
   4  -4   621931.49 1181.68
   4  -4   622413.62 1285.14
   4  -4   7  518.04   22.87
   4  -4   7  447.08   39.26
  -4   4  -7  490.50   28.96
  -4   4  -7  478.96   34.97
   4  -4   8 5257.57  179.81
   4  -4   8 5262.45  230.32
  -4   4  -8 5431.57  202.86
  -4   4  -8 5141.16  208.67
   4  -4   9 1405.86   91.74
  -4   4  -9 1440.83   63.58
  -4   4  -9 1290.99   74.29
   4  -4  10  756.74   82.52
  -4   4 -10  670.94   56.27
  -4   4 -10  833.32   48.38
  -4   4 -11 3330.68  102.49
  -4   4 -11 3659.39  148.49
  -4   4 -11 3220.62  167.76
  -4   4 -12 2056.99  118.12
  -4   4 -12 1998.49  121.30
  -4   4 -13  337.99   45.56
  -4   4 -13  265.58   57.78
  -4   4 -14  264.03   47.02
  -4   4 -14  300.93   70.63
   4  -3 -13  260.77   33.03
   4  -3 -13  281.16   78.76
  -4   3  13  210.43   64.47
   4  -3 -12  -16.05   18.70
   4  -3 -12   36.07   65.86
  -4   3  12   20.07   48.41
   4  -3 -11   52.60   16.71
   4  -3 -11   12.57   52.33
  -4   3  11  -10.50   22.16
  -4   3  11   61.20   43.05
   4  -3 -10   47.11   14.27
   4  -3 -10   27.59   47.39
  -4   3  10   55.74   31.06
  -4   3  10   75.96   22.45
   4  -3  -9   10.02   11.50
   4  -3  -9    8.45   38.59
  -4   3   9   36.70   26.04
  -4   3   9   19.14   15.54
   4  -3  -8  670.75   54.49
   4  -3  -8  692.34   25.00
   4  -3  -8  823.26   94.83
  -4   3   8  741.06   76.82
  -4   3   8  725.70   33.66
  -4   3   8  688.52   52.76
   4  -3  -711176.67  443.36
   4  -3  -711161.63  538.74
   4  -3  -710890.52  603.36
  -4   3   710685.49  517.63
  -4   3   710781.35  453.86
  -4   3   711257.66  606.72
   4  -3  -6 1373.26   40.08
   4  -3  -6 1450.60   67.01
   4  -3  -6 1498.19   93.79
  -4   3   6 1376.38   65.61
  -4   3   6 1424.20   86.40
  -4   3   6 1292.44   42.19
   4  -3  -5  994.61   65.23
   4  -3  -5  910.90   27.75
   4  -3  -5  895.50   45.90
  -4   3   5  946.95   62.09
  -4   3   5  860.92   43.25
  -4   3   5  891.96   34.58
   4  -3  -4 1719.65   93.02
   4  -3  -4 2048.77   73.21
   4  -3  -4 2048.11   52.98
  -4   3   4 1893.33   89.14
  -4   3   4 2108.75   85.79
  -4   3   4 1936.00   59.96
   4  -3  -3  674.56   48.46
   4  -3  -3  742.47   41.34
   4  -3  -3  704.81   21.49
  -4   3   3  788.10   46.71
  -4   3   3  635.70   32.68
  -4   3   3  690.11   29.99
   4  -3  -2 2457.17  105.57
   4  -3  -2 2534.96   88.59
   4  -3  -2 2679.24   93.75
   4  -3  -2 2602.80   78.51
  -4   3   2 2549.53   81.24
  -4   3   2 2537.35   77.08
   4  -3   0   86.53   13.96
   4  -3   0   37.19   11.39
   4  -3   0   53.78   19.97
  -4   3   0   63.05   14.57
  -4   3   0   51.64   14.44
   4  -3   1  937.22   29.08
   4  -3   1  938.72   28.48
   4  -3   1  961.67   28.25
   4  -3   1  943.53   48.04
  -4   3  -1  901.78   34.25
  -4   3  -1  960.66   27.76
   4  -3   2 1885.07   48.35
   4  -3   2 1751.96   46.35
   4  -3   2 1604.37   48.40
   4  -3   2 1704.92   42.27
   4  -3   2 1876.91   71.75
  -4   3  -2 1710.48   55.18
   4  -3   3   14.98    7.69
   4  -3   3   29.30   12.44
   4  -3   3    0.95   12.79
   4  -3   3   25.83    7.58
  -4   3  -3   19.64   10.68
  -4   3  -3   22.75   13.39
  -4   3  -415739.14  727.64
   4  -3   5 5126.07  157.54
   4  -3   5 5113.54  184.73
  -4   3  -5 5038.93  166.84
  -4   3  -5 5175.81  176.19
   4  -3   6 2096.76   59.26
   4  -3   6 1976.54   77.87
  -4   3  -6 2218.33   69.92
  -4   3  -6 2084.76   74.02
   4  -3   7  384.85   20.15
   4  -3   7  443.00   12.57
   4  -3   7  463.64   42.02
  -4   3  -7  430.15   25.66
  -4   3  -7  490.06   32.24
   4  -3   8  444.97   27.29
   4  -3   8  418.84   17.95
   4  -3   8  527.95   49.13
  -4   3  -8  465.12   37.10
  -4   3  -8  408.17   28.04
  -4   3  -8  444.98   25.74
   4  -3   9    3.26   10.24
   4  -3   9   -3.67   32.96
  -4   3  -9   -4.04   15.86
  -4   3  -9   15.98   17.19
  -4   3  -9    1.40   24.21
   4  -3  10 1582.87   54.52
   4  -3  10 1663.11  125.10
  -4   3 -10 1554.04   66.05
  -4   3 -10 1620.58   88.27
  -4   3 -10 1550.41   66.83
   4  -3  11 1468.13   58.82
  -4   3 -11 1597.52   75.13
  -4   3 -11 1417.05   92.73
   4  -3  12  335.20   28.89
  -4   3 -12  162.83   37.87
  -4   3 -12  344.24   52.21
  -4   3 -13  145.37   48.34
  -4   3 -13  181.79   51.87
  -4   3 -14  388.51   51.09
  -4   3 -14  327.22   75.48
   4  -2 -14  160.43   67.45
  -4   2  14   23.59   52.79
   4  -2 -13  531.43   37.27
   4  -2 -13  414.36   90.12
  -4   2  13  309.56   86.38
   4  -2 -12   14.40   17.24
   4  -2 -12   14.17   47.98
  -4   2  12    6.42   22.73
  -4   2  12  -12.38   43.58
   4  -2 -11   10.56   14.59
   4  -2 -11   41.23   42.07
  -4   2  11   12.46   16.08
  -4   2  11   25.94   39.10
   4  -2 -10   12.75   11.53
   4  -2 -10   -5.80   36.97
  -4   2  10   31.33   35.91
  -4   2  10    3.74   16.32
   4  -2  -9    9.45   30.42
   4  -2  -9   28.32   12.45
   4  -2  -9    2.96   53.84
  -4   2   9    7.90   26.03
  -4   2   9   58.00   14.95
   4  -2  -8 5387.93  169.19
   4  -2  -8 5479.66  236.06
   4  -2  -8 5681.38  321.07
  -4   2   8 5148.51  268.40
  -4   2   8 5216.04  229.63
  -4   2   8 5117.24  171.77
   4  -2  -7 1935.40   51.69
   4  -2  -7 1886.52   80.45
   4  -2  -7 1692.28  110.13
  -4   2   7 1775.23  105.23
  -4   2   7 1733.98   53.04
  -4   2   7 1942.31   80.97
   4  -2  -6 5340.10  207.28
   4  -2  -6 5459.27  156.54
   4  -2  -6 5148.51  248.03
  -4   2   6 5334.96  243.09
  -4   2   6 5434.39  206.81
  -4   2   6 5487.25  167.66
   4  -2  -5   65.20    7.24
   4  -2  -5   76.74   31.76
   4  -2  -5   35.89   18.13
  -4   2   5   75.25   27.65
  -4   2   5   37.20   18.04
  -4   2   5   65.57    9.96
   4  -2  -4   13.39   25.48
   4  -2  -4   19.70    6.80
   4  -2  -4   21.22   14.57
  -4   2   4   18.28   16.39
  -4   2   4   21.86    9.26
   4  -2  -3   27.05   13.96
   4  -2  -3   66.89   22.51
   4  -2  -3   37.04    7.69
  -4   2   3   13.20   14.90
  -4   2   3   43.84   20.23
  -4   2   3   33.47   10.49
   4  -2  -2    2.68   19.97
   4  -2  -2    7.31   10.13
   4  -2  -2    9.00   11.61
  -4   2   2    4.38   16.13
  -4   2   2   -0.12   12.32
  -4   2   2   -4.32   12.96
   4  -2  -1 6681.27  279.42
   4  -2  -1 6906.66  239.44
   4  -2  -1 6595.36  228.95
   4  -2  -1 7007.05  232.60
  -4   2   1 6805.14  239.33
   4  -2   0 5463.49  155.34
   4  -2   0 5060.45  183.93
   4  -2   0 5499.78  171.95
   4  -2   0 5591.80  173.64
  -4   2   0 5638.70  180.80
   4  -2   1  887.09   24.64
   4  -2   1  921.14   39.40
   4  -2   1  867.54   23.23
   4  -2   1  939.69   28.06
  -4   2  -1  839.05   30.55
  -4   2  -1  821.67   28.14
   4  -2   2 3452.77   89.68
   4  -2   2 3443.70   87.33
   4  -2   2 3344.92   92.77
   4  -2   2 3596.91  109.62
  -4   2  -2 3487.69  101.84
  -4   2  -2 3231.45   92.19
   4  -2   3 7708.75  254.25
   4  -2   3 7872.12  271.51
   4  -2   3 7825.56  283.23
  -4   2  -3 7703.84  274.07
  -4   2  -3 7695.97  262.84
   4  -2   421145.33 1109.01
   4  -2   516368.89  758.71
   4  -2   516532.30  808.34
  -4   2  -516793.94  801.38
   4  -2   6 1175.68   36.00
   4  -2   6 1127.12   34.15
   4  -2   6 1189.97   54.73
  -4   2  -6 1071.78   38.92
  -4   2  -6 1213.72   43.63
  -4   2  -6 1136.74   46.68
   4  -2   7  -17.74   11.59
   4  -2   7   19.03    9.93
   4  -2   7   11.42   20.88
  -4   2  -7    0.38   16.94
  -4   2  -7    4.52   16.94
  -4   2  -7    3.02   17.82
   4  -2   8 1667.12   51.63
   4  -2   8 1624.57   53.13
   4  -2   8 1657.29   88.32
  -4   2  -8 1684.25   60.87
  -4   2  -8 1497.58   67.01
  -4   2  -8 1642.84   72.84
   4  -2   9   -9.56   15.32
   4  -2   9   19.71   32.13
  -4   2  -9    0.39   20.65
  -4   2  -9   -4.79   23.42
  -4   2  -9   -3.01   23.19
   4  -2  10 7460.68  416.17
   4  -2  10 7243.05  280.97
  -4   2 -10 7029.09  307.25
  -4   2 -10 7339.44  337.76
  -4   2 -10 7064.68  331.31
   4  -2  11  336.22   32.22
  -4   2 -11  309.70   34.41
  -4   2 -11  296.56   48.26
   4  -2  12   25.16   25.86
  -4   2 -12   31.39   32.24
  -4   2 -12   55.66   37.43
  -4   2 -13   19.44   35.26
  -4   2 -13   -3.89   43.99
  -4   2 -14   39.19   43.00
  -4   2 -14 -116.65   51.74
   4  -1 -14   40.40   24.11
   4  -1 -14   29.45   71.22
  -4   1  14   11.86   41.93
   4  -1 -13 1695.53   69.79
   4  -1 -13 1834.81  147.05
  -4   1  13 1624.13  136.81
   4  -1 -12   97.97   20.24
   4  -1 -12   38.00   43.30
  -4   1  12   42.74   43.11
  -4   1  12    0.89   22.31
   4  -1 -11  751.02   35.11
   4  -1 -11  698.80   97.39
  -4   1  11  738.13   31.71
  -4   1  11  666.03   69.63
   4  -1 -10    5.86   13.08
   4  -1 -10   14.96   35.05
  -4   1  10   13.70   13.66
  -4   1  10   26.06   24.18
   4  -1  -9  171.88   31.64
   4  -1  -9  112.95   13.59
   4  -1  -9  137.04   42.58
  -4   1   9   81.97   43.95
  -4   1   9  127.98   38.21
  -4   1   9  121.60   14.43
   4  -1  -8 5135.47  154.87
   4  -1  -8 5055.38  211.28
   4  -1  -8 5127.30  253.75
  -4   1   8 5115.10  157.99
  -4   1   8 5014.28  252.04
  -4   1   8 5042.69  212.97
   4  -1  -7 7168.41  334.37
   4  -1  -7 7039.37  284.69
   4  -1  -7 7168.61  227.63
  -4   1   7 6836.20  330.18
  -4   1   7 7168.77  233.57
  -4   1   7 7145.35  295.08
   4  -1  -6   96.16   18.80
   4  -1  -6   70.32    7.24
   4  -1  -6   41.84   28.66
  -4   1   6   67.47   29.62
  -4   1   6   65.27    8.67
  -4   1   6   56.39   24.04
   4  -1  -5 3021.07  145.26
   4  -1  -5 2936.55   63.99
   4  -1  -5 2940.10   95.34
  -4   1   5 3031.30  127.64
  -4   1   5 2949.09   75.03
  -4   1   5 2918.98   99.97
   4  -1  -4    7.45    3.92
   4  -1  -4   10.08   12.40
   4  -1  -4   34.09   20.96
  -4   1   4    0.66   20.29
  -4   1   4   16.36    6.77
  -4   1   4    3.71   13.95
   4  -1  -3 7491.97  322.75
   4  -1  -3 7295.71  259.44
  -4   1   3 7419.49  293.43
  -4   1   3 7452.19  270.81
   4  -1  -1    6.11   16.67
   4  -1  -1   -2.17    9.15
   4  -1  -1   -3.31    3.96
   4  -1   0   12.34   16.96
   4  -1   0   19.25    5.30
   4  -1   0   27.23   12.18
   4  -1   0   23.28    7.93
   4  -1   0    6.06   10.80
  -4   1   0   18.48    7.81
   4  -1   1  266.92   11.68
   4  -1   1  258.03   12.49
  -4   1  -1  271.25   13.43
  -4   1  -1  246.18   13.48
  -4   1  -1  283.31   18.10
   4  -1   2   64.25   21.27
   4  -1   2   61.43    8.59
   4  -1   2   71.53    7.24
  -4   1  -2   43.78   16.55
  -4   1  -2   53.63    9.00
  -4   1  -2   48.24   10.13
   4  -1   310678.19  398.07
   4  -1   310825.42  454.17
   4  -1   311106.54  423.50
  -4   1  -311149.01  413.86
  -4   1  -310439.00  436.87
   4  -1   4 2615.50   86.42
   4  -1   4 2531.51   66.89
   4  -1   4 2469.63   76.80
  -4   1  -4 2595.14   74.73
  -4   1  -4 2511.57   70.54
  -4   1  -4 2630.49   92.67
   4  -1   5 9409.90  346.60
   4  -1   5 9569.54  386.46
   4  -1   5 9615.17  373.58
  -4   1  -5 9549.26  394.70
  -4   1  -5 9510.93  363.48
  -4   1  -5 9384.89  363.12
   4  -1   6  691.68   31.58
   4  -1   6  698.45   35.88
   4  -1   6  685.31   42.16
  -4   1  -6  773.55   35.44
  -4   1  -6  775.13   35.62
  -4   1  -6  770.15   45.32
   4  -1   7  490.69   21.90
   4  -1   7  423.66   31.07
   4  -1   7  576.08   42.68
  -4   1  -7  588.57   43.92
  -4   1  -7  523.65   27.44
  -4   1  -7  560.73   35.05
   4  -1   8 1839.11   73.37
   4  -1   8 1816.88   58.72
   4  -1   8 1781.97  103.74
  -4   1  -8 1746.39   79.62
  -4   1  -8 1738.54   64.69
  -4   1  -8 1870.58   91.28
   4  -1   9  105.44   26.58
   4  -1   9   91.42   45.62
  -4   1  -9  108.73   20.76
  -4   1  -9  117.27   39.77
  -4   1  -9  114.49   28.95
   4  -1  10 1840.07   86.64
   4  -1  10 1774.94  153.69
  -4   1 -10 1826.38   90.63
  -4   1 -10 1813.19   99.99
   4  -1  11 2599.77  122.10
  -4   1 -11 2851.24  115.21
  -4   1 -11 2651.92  134.70
   4  -1  12  -10.72   29.30
  -4   1 -12   -6.21   35.01
  -4   1 -12   -2.87   23.10
  -4   1 -13  293.44   64.07
  -4   1 -13  285.91   42.13
  -4   1 -14  269.55   48.87
  -4   1 -14  434.06   76.90
   4   0 -15  116.83   94.87
  -4   0  15  286.28   62.19
   4   0 -14  270.29   38.49
   4   0 -14  156.60   76.29
  -4   0  14  419.00   73.66
   4   0 -13   61.58   24.44
   4   0 -13   29.80   50.18
  -4   0  13   19.89   49.76
   4   0 -12  506.56   32.17
   4   0 -12  561.28   82.99
  -4   0  12  380.07   67.47
   4   0 -11  169.61   18.95
   4   0 -11  162.28   45.25
  -4   0  11   98.48   35.04
  -4   0  11  152.76   17.93
   4   0 -10  306.45   19.04
   4   0 -10  283.37   46.62
   4   0 -10  188.00   48.82
  -4   0  10  293.87   18.08
  -4   0  10  363.07   44.84
   4   0  -9  600.08   39.58
   4   0  -9  529.04   23.24
   4   0  -9  588.44   60.43
  -4   0   9  460.58   63.06
  -4   0   9  510.24   20.43
  -4   0   9  663.99   44.71
   4   0  -8  479.83   18.04
   4   0  -8  402.55   52.73
   4   0  -8  505.92   35.82
  -4   0   8  448.51   38.13
  -4   0   8  512.45   17.66
  -4   0   8  540.75   53.86
   4   0  -7   20.48    7.21
   4   0  -7   25.06   27.32
   4   0  -7   17.32   16.78
  -4   0   7    1.10   26.84
  -4   0   7    3.70   18.72
  -4   0   7   14.06    6.42
   4   0  -6  585.74   14.56
   4   0  -6  545.07   28.31
   4   0  -6  594.51   45.93
  -4   0   6  589.30   45.65
  -4   0   6  572.93   32.70
  -4   0   6  578.65   13.62
   4   0  -5   71.78   17.14
   4   0  -5  100.24   21.57
  -4   0   5   34.40   21.60
  -4   0   5   -0.72    3.19
  -4   0   5   78.93   14.98
   4   0  -4   22.92   13.20
   4   0  -4   -3.49   26.64
  -4   0   4   29.30   19.11
  -4   0   4   54.97   15.19
   4   0  -3 1252.25   40.84
   4   0  -3 1272.38   62.95
  -4   0   3 1260.09   60.18
  -4   0   3 1161.06   50.66
   4   0  -1 1023.96   42.65
   4   0  -1  934.08   20.51
   4   0  -1  924.62   53.02
  -4   0   1  977.48   36.17
  -4   0   1  976.95   20.55
   4   0   0 1516.91   45.46
   4   0   0 1578.63   36.36
   4   0   0 1482.21   33.16
   4   0   0 1477.01   56.46
  -4   0   0 1630.86   59.47
  -4   0   0 1566.32   35.82
   4   0   1 1283.61   28.70
   4   0   1 1343.24   29.78
   4   0   1 1268.90   59.67
  -4   0  -1 1381.07   30.50
  -4   0  -1 1262.51   30.71
  -4   0  -1 1315.54   51.74
   4   0   2    6.05    6.26
   4   0   2    0.18   18.98
   4   0   2   -2.10    8.61
  -4   0  -2   14.31    7.87
  -4   0  -2   12.90   16.55
  -4   0  -2    2.27    6.86
   4   0   310238.21  374.92
   4   0   310153.01  435.21
   4   0   3 9657.96  372.89
  -4   0  -310344.87  386.27
  -4   0  -310728.22  389.76
  -4   0  -310084.90  438.86
   4   0   5  100.80   11.40
   4   0   5  111.24   25.07
   4   0   5   82.80   19.79
  -4   0  -5  129.37   18.39
  -4   0  -5   90.02   14.09
  -4   0  -5  121.14   24.50
   4   0   6 1770.72   78.71
   4   0   6 1708.13   50.18
   4   0   6 1795.50   80.72
  -4   0  -6 1791.55   63.08
  -4   0  -6 1730.71   79.38
  -4   0  -6 1788.34   57.04
   4   0   7   62.19   13.12
   4   0   7   54.36   21.43
   4   0   7   41.07   31.31
  -4   0  -7  103.89   33.26
  -4   0  -7   90.85   16.12
  -4   0  -7   86.03   22.91
   4   0   8 1769.77   82.23
   4   0   8 1704.30   58.16
   4   0   8 1597.86  103.44
  -4   0  -8 1734.98   63.70
  -4   0  -8 1812.47  100.02
  -4   0  -8 1709.05   76.07
   4   0   9 4725.63  253.00
   4   0   9 4978.27  196.81
  -4   0  -9 3855.00  204.08
  -4   0  -9 4764.45  173.14
  -4   0  -9 4766.16  204.60
   4   0  10  133.87   64.76
   4   0  10  208.59   35.18
  -4   0 -10  233.59   28.59
  -4   0 -10  179.65   51.03
  -4   0 -10  219.36   42.54
   4   0  11   19.67   28.43
  -4   0 -11   33.87   21.82
  -4   0 -11  -11.73   44.13
  -4   0 -11   35.42   34.90
   4   0  12   44.97   32.47
  -4   0 -12   17.62   45.28
  -4   0 -12   39.67   25.88
   4   0  13  106.41   53.13
  -4   0 -13   76.76   32.78
  -4   0 -13   86.07   55.51
   4   1 -15   60.11   62.73
  -4  -1  15  189.28   68.05
   4   1 -14   72.78   51.98
  -4  -1  14   90.50   55.41
   4   1 -13  198.74   29.39
   4   1 -13  221.34   55.86
  -4  -1  13  272.18   56.33
   4   1 -12    9.88   17.55
   4   1 -12   -4.23   35.60
  -4  -1  12  -26.14   31.58
  -4  -1  12   -9.79   14.55
   4   1 -11  385.45   25.24
   4   1 -11  256.50   51.98
   4   1 -11  427.09   51.90
  -4  -1  11  280.40   51.68
  -4  -1  11  386.55   20.24
   4   1 -10   86.14   15.33
   4   1 -10   92.00   25.48
   4   1 -10   44.16   34.18
  -4  -1  10   48.91   39.75
  -4  -1  10   73.00   33.91
  -4  -1  10   70.55   11.40
   4   1  -9 7587.37  323.76
   4   1  -9 7646.19  265.76
   4   1  -9 7688.52  411.05
  -4  -1   9 7962.39  396.31
  -4  -1   9 7459.10  329.08
  -4  -1   9 7764.60  257.92
   4   1  -8 2055.60   90.18
   4   1  -8 2020.50  102.13
  -4  -1   8 2070.79  106.42
  -4  -1   8 2061.37   47.78
  -4  -1   8 2055.03   97.52
   4   1  -7   11.76   14.60
   4   1  -7    4.96   24.19
  -4  -1   7   11.73   23.79
  -4  -1   7    4.17    5.10
  -4  -1   7   19.50   17.65
  -4  -1   7   -9.61   23.71
  -4  -1   7    6.83   13.37
   4   1  -6 2340.43   77.84
   4   1  -6 2269.62   93.22
  -4  -1   6 2365.96   47.48
  -4  -1   6 2286.94   91.94
  -4  -1   6 2496.58   65.41
  -4  -1   6 2352.78  103.96
   4   1  -5  643.78   39.06
   4   1  -5  674.47   45.80
   4   1  -5  651.11   28.23
  -4  -1   5  617.76   12.64
  -4  -1   5  580.57   38.88
   4   1  -4 8099.07  333.30
   4   1  -4 7773.71  289.12
   4   1  -4 8249.69  333.78
  -4  -1   4 8338.27  346.54
   4   1  -321359.56 1143.01
   4   1  -2  766.13   42.03
   4   1  -2  691.33   15.90
   4   1  -2  726.24   30.40
  -4  -1   2  619.57   29.84
  -4  -1   2  720.39   35.39
  -4  -1   2  692.38   15.58
   4   1  -1 1936.08   42.78
   4   1  -1 1897.94   53.30
   4   1  -1 1913.41   77.16
  -4  -1   1 1839.07   69.00
  -4  -1   1 1947.22   59.08
  -4  -1   1 1891.82   41.90
   4   1   0 6007.66  174.89
   4   1   0 6096.32  238.14
  -4  -1   0 5714.34  163.55
  -4  -1   0 6357.39  241.95
   4   1   1   80.04    7.75
   4   1   1   42.55   28.55
  -4  -1  -1   70.18    8.26
  -4  -1  -1   76.97   19.84
   4   1   215156.83  774.71
  -4  -1  -215476.20  779.96
   4   1   3    8.55   14.81
   4   1   3   25.76   23.00
   4   1   3    3.54    8.69
  -4  -1  -3   12.27    9.43
  -4  -1  -3    4.69   21.64
  -4  -1  -3    8.75    9.04
   4   1   4 7836.47  331.44
   4   1   4 7442.72  291.30
   4   1   4 8330.80  283.81
  -4  -1  -4 7588.50  265.22
  -4  -1  -4 7557.52  328.02
  -4  -1  -4 7373.36  267.35
   4   1   5 1064.44   50.63
   4   1   5  962.95   31.49
   4   1   5 1052.52   55.52
  -4  -1  -5 1035.99   62.21
  -4  -1  -5 1094.67   39.25
  -4  -1  -5 1112.37   35.74
   4   1   6   15.10   23.38
   4   1   6   -5.04   13.54
   4   1   6  -14.02   22.00
  -4  -1  -6   19.07   12.73
  -4  -1  -6    2.43   28.35
  -4  -1  -6   19.74   16.83
   4   1   7  659.80   27.94
   4   1   7  625.23   56.96
   4   1   7  691.46   51.54
  -4  -1  -7  719.23   32.95
  -4  -1  -7  691.99   65.34
  -4  -1  -7  670.70   41.53
   4   1   8 2698.72  154.36
   4   1   8 2936.49  138.86
  -4  -1  -8 3020.05  104.43
  -4  -1  -8 2831.63  157.94
  -4  -1  -8 2874.40  127.44
   4   1   9 4432.86  202.20
   4   1   9 4457.55  259.60
  -4  -1  -9 4470.55  165.02
  -4  -1  -9 4362.39  248.97
  -4  -1  -9 4541.60  205.66
   4   1  10  566.83   84.39
   4   1  10  263.21   50.63
  -4  -1 -10  561.12   37.11
  -4  -1 -10  426.45   75.81
  -4  -1 -10  511.28   55.34
   4   1  11  275.20   46.49
  -4  -1 -11  265.18   55.50
  -4  -1 -11  247.79   40.42
  -4  -1 -11   -7.05   84.81
   4   1  12   43.72   37.57
  -4  -1 -12   -2.38   25.20
  -4  -1 -12    9.08   40.30
   4   1  13  251.91   58.27
  -4  -1 -13  189.24   43.03
  -4  -1 -13  255.21   68.97
   4   2 -15   10.82   83.00
   4   2 -15  241.38   62.44
  -4  -2  15  260.06   59.96
   4   2 -14  389.67   93.56
  -4  -2  14  510.85   62.43
   4   2 -13  338.24   60.91
  -4  -2  13  387.68   62.20
   4   2 -12  708.85   64.60
  -4  -2  12  588.46   27.82
  -4  -2  12  640.58   51.73
   4   2 -11 1322.12   70.16
   4   2 -11 1076.67   81.20
  -4  -2  11 1261.98   73.65
  -4  -2  11 1224.45   75.97
  -4  -2  11 1324.26   40.18
   4   2 -10  193.09   53.64
   4   2 -10  305.42   38.08
  -4  -2  10  222.40   33.75
  -4  -2  10  285.22   70.93
  -4  -2  10  251.99   15.39
   4   2  -9   87.55   32.68
   4   2  -9   49.27   28.25
  -4  -2   9   45.75   23.19
  -4  -2   9   62.08    9.73
  -4  -2   9  109.85   33.26
   4   2  -8 9221.97  425.77
   4   2  -8 9015.48  377.06
   4   2  -8 9269.18  433.91
  -4  -2   8 9575.18  322.67
  -4  -2   8 9434.83  372.27
  -4  -2   8 9234.11  447.65
   4   2  -7 1663.38   85.63
   4   2  -7 1741.43   57.35
   4   2  -7 1358.52   65.70
  -4  -2   7 1521.67   49.09
  -4  -2   7 1511.12   32.31
  -4  -2   7 1575.35   74.17
   4   2  -611947.17  567.67
   4   2  -612090.51  526.55
   4   2  -612087.62  553.98
  -4  -2   612304.51  603.03
   4   2  -5 7779.86  333.23
   4   2  -5 7915.00  323.38
  -4  -2   5 8223.13  348.96
   4   2  -4 1643.85   72.56
   4   2  -4 1540.44   55.74
   4   2  -4 1728.46   47.17
   4   2  -4 1734.91   66.60
  -4  -2   4 1678.42   37.25
  -4  -2   4 1544.42   67.26
   4   2  -323162.35 1383.34
   4   2  -2 4671.81  127.20
   4   2  -2 4612.61  134.58
   4   2  -2 4602.91  185.72
  -4  -2   2 4610.52  171.28
  -4  -2   2 4695.52  143.81
   4   2  -1  443.44   13.52
   4   2  -1  453.74   15.98
   4   2  -1  543.02   50.90
  -4  -2   1  455.69   15.27
  -4  -2   1  436.80   33.74
  -4  -2   1  497.28   19.67
   4   2   0 3020.11  148.50
   4   2   0 3162.97   85.02
  -4  -2   0 3144.21   79.41
  -4  -2   0 3131.82  132.90
   4   2   1 1226.50   36.20
   4   2   1 1175.38   60.02
  -4  -2  -1 1264.00   56.99
  -4  -2  -1 1199.09   31.81
   4   2   227618.77 1793.89
   4   2   313881.72  715.39
   4   2   313224.08  594.73
  -4  -2  -313787.32  714.21
  -4  -2  -313835.47  594.32
   4   2   4   37.02   28.29
   4   2   4   39.94   14.01
   4   2   4   57.23   21.00
  -4  -2  -4   51.54   12.54
  -4  -2  -4    5.83   32.10
  -4  -2  -4   50.49   16.07
   4   2   5  529.20   41.35
   4   2   5  384.86   20.23
   4   2   5  516.44   45.36
  -4  -2  -5  449.00   22.14
  -4  -2  -5  597.08   51.56
  -4  -2  -5  459.24   28.88
   4   2   6  279.13   38.11
   4   2   6  322.18   19.75
   4   2   6  257.69   38.94
  -4  -2  -6  259.34   26.91
  -4  -2  -6  375.79   52.33
  -4  -2  -6  333.95   27.60
   4   2   7 1133.61   81.26
   4   2   7 1214.10   46.36
   4   2   7 1203.57   75.23
  -4  -2  -7 1250.86   96.07
  -4  -2  -7 1136.07   45.59
  -4  -2  -7 1161.30   59.37
   4   2   8 2989.87  176.35
   4   2   8 3465.92  168.33
  -4  -2  -8 3403.43  124.48
  -4  -2  -8 3337.62  197.34
  -4  -2  -8 3364.89  150.32
   4   2   9  -36.49   43.63
   4   2   9   -4.05   32.70
  -4  -2  -9   26.61   23.97
  -4  -2  -9   39.15   47.03
  -4  -2  -9  -29.61   29.38
   4   2  10  448.96   87.83
   4   2  10  276.64   54.76
  -4  -2 -10  289.20   82.98
  -4  -2 -10  369.28   52.16
  -4  -2 -10  308.96   32.09
   4   2  11   51.45   43.44
  -4  -2 -11   65.17   45.62
  -4  -2 -11   73.14   26.75
   4   2  12  -20.46   43.72
  -4  -2 -12    5.16   25.08
  -4  -2 -12   22.85   43.29
   4   3 -16   37.45   78.61
   4   3 -15  833.17  138.15
   4   3 -15  814.37   90.04
  -4  -3  15  812.44   88.34
   4   3 -14    5.38   57.21
   4   3 -14  -39.69   42.61
  -4  -3  14  -59.90   38.91
   4   3 -13  335.08   71.41
   4   3 -13  307.54   50.99
  -4  -3  13  241.80   46.79
   4   3 -12   13.38   29.97
   4   3 -12   -2.60   42.32
   4   3 -12   10.49   30.88
  -4  -3  12  -10.46   12.38
  -4  -3  12   -2.58   30.93
   4   3 -11   11.40   31.71
   4   3 -11    2.11   29.54
   4   3 -11    1.56   27.85
  -4  -3  11   18.08   10.88
  -4  -3  11   11.24   22.82
   4   3 -10 9517.33  515.19
   4   3 -10 9488.10  437.73
   4   3 -10 8697.97  441.75
  -4  -3  10 9517.60  346.33
  -4  -3  10 9418.16  420.06
  -4  -3  10 8997.38  483.01
   4   3  -9  244.53   45.51
   4   3  -9  167.26   23.00
   4   3  -9  159.29   34.02
  -4  -3   9  207.88   12.41
  -4  -3   9  132.38   26.69
  -4  -3   9  206.91   50.01
   4   3  -8    1.12   18.83
   4   3  -8   -7.51   24.25
   4   3  -8    0.31   27.48
  -4  -3   8   -4.80    6.70
  -4  -3   8    1.29   13.70
  -4  -3   8   16.81   30.55
   4   3  -7  156.18   19.45
   4   3  -7  128.43   31.44
   4   3  -7  150.19   29.30
  -4  -3   7  152.18    9.35
  -4  -3   7  165.50   17.72
  -4  -3   7  171.53   37.25
   4   3  -6  435.48   37.61
   4   3  -6  390.76   24.97
   4   3  -6  419.67   25.99
  -4  -3   6  365.19   12.75
  -4  -3   6  352.69   17.31
  -4  -3   6  397.44   28.99
   4   3  -5 5809.30  195.58
   4   3  -5 5808.18  216.76
   4   3  -5 5490.88  252.86
  -4  -3   5 5679.26  217.05
  -4  -3   5 5590.10  171.55
  -4  -3   5 5793.92  226.80
   4   3  -413393.50  689.13
  -4  -3   413807.93  666.97
  -4  -3   414493.97  666.85
   4   3  -3 7245.22  239.81
   4   3  -3 6866.27  231.40
   4   3  -3 7369.85  347.38
  -4  -3   3 7093.01  289.16
  -4  -3   3 7172.74  251.28
   4   3  -2    4.61    9.09
   4   3  -2    4.11    8.18
   4   3  -2   -6.41   23.94
  -4  -3   2    2.38    8.13
  -4  -3   2   16.30   10.90
  -4  -3   2   -1.96   19.14
   4   3  -1 2463.30  112.68
   4   3  -1 2659.66   62.03
   4   3  -1 2751.10   75.96
  -4  -3   1 2709.00   73.58
  -4  -3   1 2792.15   70.71
  -4  -3   1 2669.39  109.80
   4   3   0  601.17   48.52
   4   3   0  615.33   23.58
  -4  -3   0  602.88   22.64
  -4  -3   0  614.78   20.23
  -4  -3   0  633.14   15.54
  -4  -3   0  616.40   44.57
   4   3   1 6173.28  200.89
   4   3   1 5745.40  252.49
  -4  -3  -1 6068.76  193.36
  -4  -3  -1 5935.65  247.75
  -4  -3  -1 5762.53  181.98
   4   3   2  507.78   51.80
   4   3   2  454.88   19.95
  -4  -3  -2  512.72   17.92
  -4  -3  -2  485.43   21.28
  -4  -3  -2  484.72   41.14
  -4  -3  -2  452.60   25.11
   4   3   3 9764.12  405.07
   4   3   310529.10  531.66
   4   3   310394.22  406.44
  -4  -3  -310072.05  396.99
  -4  -3  -310300.73  524.17
  -4  -3  -310435.99  419.61
   4   3   4  265.81   34.15
   4   3   4  255.23   17.68
   4   3   4  272.43   30.74
  -4  -3  -4  225.90   51.02
  -4  -3  -4  286.57   19.01
  -4  -3  -4  234.27   26.85
   4   3   5  891.22   41.20
   4   3   5  926.82   62.79
   4   3   5  882.86   68.52
  -4  -3  -5  933.95   36.55
  -4  -3  -5  913.17   81.70
  -4  -3  -5  886.94   49.97
   4   3   6   63.38   32.09
   4   3   6   82.29   18.22
   4   3   6  110.48   27.84
  -4  -3  -6   83.03   16.91
  -4  -3  -6   65.14   49.66
  -4  -3  -6  113.43   26.72
   4   3   7  648.47   75.86
   4   3   7  815.48   72.99
  -4  -3  -7  889.64   40.53
  -4  -3  -7  937.19   60.00
   4   3   8 2659.99  167.88
   4   3   8 2792.22  161.47
  -4  -3  -8 2647.28  102.31
  -4  -3  -8 2638.42  197.16
  -4  -3  -8 2917.76  132.85
   4   3   9 1569.70  139.90
   4   3   9 1566.41  137.32
   4   3   9 1600.33  112.74
  -4  -3  -9 1643.24   71.09
  -4  -3  -9 1654.44  103.00
   4   3  10  325.36   59.83
  -4  -3 -10  329.79   34.90
  -4  -3 -10  248.60   58.18
   4   3  11  310.46   72.40
  -4  -3 -11  277.22   50.54
  -4  -3 -11  397.92   65.46
   4   3  12  101.22   67.59
  -4  -3 -12  141.46   34.63
  -4  -3 -12  105.34   56.54
   4   4 -16   82.00   86.15
   4   4 -16  100.82   56.19
   4   4 -15   29.92   64.58
   4   4 -15  -20.95   41.03
  -4  -4  15   -8.34   40.14
   4   4 -14  724.95  108.35
   4   4 -14  902.06   81.81
  -4  -4  14  872.57   72.45
   4   4 -13   28.55   33.62
   4   4 -13   -3.91   46.71
  -4  -4  13    1.00   14.70
  -4  -4  13   18.73   32.03
   4   4 -12  725.66   86.31
   4   4 -12  613.66   77.53
   4   4 -12  726.06   60.52
  -4  -4  12  740.12   26.73
  -4  -4  12  723.05   64.28
   4   4 -11 7681.84  423.51
   4   4 -11 7724.48  352.51
   4   4 -11 7210.64  354.76
  -4  -4  11 7651.32  330.36
  -4  -4  11 7469.83  257.77
   4   4 -10 6384.44  305.07
   4   4 -10 6614.16  288.19
   4   4 -10 6661.96  334.55
  -4  -4  10 6533.16  210.72
  -4  -4  10 6247.39  253.02
  -4  -4  10 6522.41  325.89
   4   4  -9  193.79   57.56
   4   4  -9  283.58   36.05
   4   4  -9  306.18   33.62
  -4  -4   9  271.57   15.22
  -4  -4   9  305.65   29.16
  -4  -4   9  309.48   41.56
   4   4  -8 1065.36   65.42
   4   4  -8 1063.80   54.94
   4   4  -8 1077.82   44.32
  -4  -4   8 1088.02   30.54
  -4  -4   8 1081.53   46.15
  -4  -4   8  991.99   72.77
   4   4  -7   -0.15   18.13
   4   4  -7   11.79   18.71
   4   4  -7   -5.56   33.60
  -4  -4   7   23.15    9.74
  -4  -4   7   16.86   14.33
  -4  -4   7   16.39   19.66
   4   4  -6  232.57   28.11
   4   4  -6  222.60   25.93
   4   4  -6  270.75   45.25
  -4  -4   6  285.40   16.56
  -4  -4   6  201.55   27.14
  -4  -4   6  201.20   29.48
   4   4  -5 1239.50   51.91
   4   4  -5 1019.25   38.57
   4   4  -5 1071.69   80.51
  -4  -4   5 1152.30   66.29
  -4  -4   5 1027.28   33.75
  -4  -4   5 1060.69   48.28
   4   4  -3  299.30   20.52
   4   4  -3  281.96   15.93
   4   4  -3  250.75   40.47
  -4  -4   3  259.73   16.19
  -4  -4   3  299.10   17.72
  -4  -4   3  309.39   33.53
   4   4  -2  597.95   21.99
   4   4  -2  636.49   52.05
   4   4  -2  634.91   27.68
  -4  -4   2  574.89   19.95
  -4  -4   2  607.19   21.20
  -4  -4   2  581.19   42.75
   4   4  -1   41.62   30.52
   4   4  -1   81.91   13.95
   4   4  -1   64.07    9.52
  -4  -4   1   71.83   13.84
  -4  -4   1   73.86    8.78
  -4  -4   1   74.92   27.08
   4   4   0  442.94   24.19
   4   4   0  494.05   49.39
  -4  -4   0  482.45   27.83
  -4  -4   0  438.75   15.57
  -4  -4   0  414.84   18.59
  -4  -4   0  554.73   41.07
   4   4   116215.99  938.10
   4   4   116263.06  759.99
  -4  -4  -115891.28  876.81
   4   4   2 3793.00  173.98
   4   4   2 4006.87  126.43
  -4  -4  -2 4012.32  147.56
  -4  -4  -2 4023.90  116.50
  -4  -4  -2 4271.07  183.90
  -4  -4  -2 3852.61  121.47
   4   4   3   46.60   30.14
   4   4   3   33.61   12.65
  -4  -4  -3   38.92   12.72
  -4  -4  -3   38.82   13.54
  -4  -4  -3   35.22   30.70
  -4  -4  -3   19.35   22.00
   4   4   4  113.71   43.74
   4   4   4   77.27   21.52
  -4  -4  -4  121.77   16.00
  -4  -4  -4   78.06   45.32
  -4  -4  -4   64.79   23.05
   4   4   5   69.06   34.45
   4   4   5  131.88   18.97
   4   4   5   83.90   43.22
  -4  -4  -5  109.74   17.20
  -4  -4  -5   64.07   54.51
  -4  -4  -5  106.38   31.55
   4   4   6  464.77   46.41
   4   4   6  253.10   64.16
  -4  -4  -6  397.30   26.70
  -4  -4  -6  210.65   83.73
   4   4   7 4414.37  225.22
   4   4   7 4266.27  239.29
  -4  -4  -7 4428.88  291.03
  -4  -4  -7 4505.70  206.34
  -4  -4  -7 4545.72  169.96
   4   4   8  126.97   51.02
   4   4   8   64.04   50.61
  -4  -4  -8  115.54   24.24
  -4  -4  -8  114.89   36.28
   4   4   9   64.16   67.54
   4   4   9   96.72   50.13
  -4  -4  -9  102.57   31.98
  -4  -4  -9   69.47   44.16
   4   4  10   13.59   50.08
  -4  -4 -10   22.14   32.39
  -4  -4 -10   52.17   44.65
   4   4  11  -13.09   50.12
  -4  -4 -11   -2.30   32.11
  -4  -4 -11   14.11   43.61
   4   5 -16  368.43  123.84
   4   5 -16  562.56   79.49
   4   5 -15    7.92   65.74
   4   5 -15    0.28   50.19
  -4  -5  15  -18.21   39.09
   4   5 -14  176.56   66.20
   4   5 -14  166.98   44.37
  -4  -5  14   48.44   39.99
   4   5 -13  -15.43   46.89
   4   5 -13   -0.98   31.85
  -4  -5  13    3.53   14.85
  -4  -5  13    1.90   31.67
   4   5 -12  819.84   93.59
   4   5 -12  714.30   80.50
   4   5 -12  689.64   63.29
  -4  -5  12  734.25   34.39
  -4  -5  12  829.72   67.52
   4   5 -11 1564.44  121.65
   4   5 -11 1555.52   85.14
   4   5 -11 1535.58   85.98
  -4  -5  11 1515.93   46.83
  -4  -5  11 1455.90   75.37
   4   5 -10  693.23   49.64
   4   5 -10  603.67   50.83
   4   5 -10  860.52   73.61
  -4  -5  10  600.35   24.73
  -4  -5  10  597.24   46.80
  -4  -5  10  739.78   76.91
   4   5  -9 1050.35   58.05
   4   5  -9 1073.03   60.70
   4   5  -9 1036.63   96.63
  -4  -5   9 1067.65   36.48
  -4  -5   9 1049.41   48.59
  -4  -5   9 1015.72   67.04
   4   5  -8 2056.27   85.10
   4   5  -8 1883.04   88.60
   4   5  -8 2088.53  105.16
  -4  -5   8 2046.96   56.67
  -4  -5   8 1919.47   67.08
  -4  -5   8 1940.24   87.21
   4   5  -7 1816.06   68.66
   4   5  -7 1690.21   71.87
   4   5  -7 1665.69   89.82
  -4  -5   7 1778.73   74.28
  -4  -5   7 1640.63   58.54
  -4  -5   7 1747.88   72.11
   4   5  -6 5629.28  213.38
   4   5  -6 5599.75  213.85
   4   5  -6 5788.72  264.25
  -4  -5   6 5623.70  244.42
  -4  -5   6 5341.46  183.58
  -4  -5   6 5650.30  221.75
   4   5  -5 4570.67  163.10
   4   5  -5 4874.75  175.48
   4   5  -5 4830.92  227.75
  -4  -5   5 4805.26  218.20
  -4  -5   5 4834.04  159.60
  -4  -5   5 4694.64  175.68
   4   5  -4 1896.84   70.32
   4   5  -4 2016.86  108.40
   4   5  -4 1917.31   62.35
  -4  -5   4 1952.84   61.69
  -4  -5   4 1974.62   91.64
  -4  -5   4 1929.67   64.87
   4   5  -3 1825.68   65.89
   4   5  -3 1776.80   53.47
   4   5  -3 1794.28   99.76
  -4  -5   3 1784.49   51.90
  -4  -5   3 1872.94   54.76
  -4  -5   3 1962.28   89.78
   4   5  -2 1005.87   36.19
   4   5  -2 1066.35   31.54
   4   5  -2  967.91   70.28
  -4  -5   2  934.91   31.36
  -4  -5   2  883.04   58.14
  -4  -5   2  945.91   37.13
   4   5  -1 1544.90   46.24
   4   5  -1 1494.64   54.07
   4   5  -1 1620.89   90.38
  -4  -5   1 1368.28   43.95
  -4  -5   1 1572.28   41.81
  -4  -5   1 1674.11   84.29
   4   5   0 4377.87  213.73
   4   5   0 4164.72  137.46
  -4  -5   0 4738.10  134.80
  -4  -5   0 4801.50  171.66
  -4  -5   0 4261.03  136.09
  -4  -5   0 4705.93  210.76
   4   5   1 5435.90  296.57
   4   5   1 5434.56  190.79
  -4  -5  -1 5677.57  215.49
  -4  -5  -1 5696.31  176.02
  -4  -5  -1 5485.23  183.91
  -4  -5  -1 5364.22  256.91
   4   5   2 8633.59  336.88
   4   5   2 8512.98  424.67
  -4  -5  -2 8200.84  363.37
  -4  -5  -2 8783.95  315.44
  -4  -5  -2 8349.63  424.38
  -4  -5  -2 8455.21  321.68
   4   5   3   12.31   32.15
   4   5   3   60.78   15.60
  -4  -5  -3   45.63   15.90
  -4  -5  -3   53.00   15.10
  -4  -5  -3   47.77   37.67
  -4  -5  -3   36.01   26.41
   4   5   4   -3.54   29.77
   4   5   4   29.86   15.48
  -4  -5  -4    5.09   15.99
  -4  -5  -4   -0.81   46.56
  -4  -5  -4    4.98   14.59
  -4  -5  -4   27.18   26.60
   4   5   5    1.25   30.02
  -4  -5  -5   60.41   49.71
  -4  -5  -5   -3.60   18.91
  -4  -5  -5    6.11   17.40
  -4  -5  -5    5.62   25.12
   4   5   6  -15.42   35.09
  -4  -5  -6   15.80   16.84
  -4  -5  -6   49.49   30.63
   4   5   7 4608.03  259.81
   4   5   7 4724.31  245.53
  -4  -5  -7 4943.33  196.76
  -4  -5  -7 5185.82  248.23
   4   5   8  143.15   67.66
   4   5   8  210.37   64.34
  -4  -5  -8  212.17   36.80
  -4  -5  -8  310.84   49.93
   4   5   9   34.96   47.66
  -4  -5  -9   18.26   22.76
  -4  -5  -9   27.01   41.70
   4   5  10   48.31   56.24
  -4  -5 -10    6.61   33.34
  -4  -5 -10   -0.51   47.79
   4   6 -16  748.28  117.02
   4   6 -16  669.50  144.36
   4   6 -15   99.00   64.13
   4   6 -15  154.31   77.76
  -4  -6  15  141.01   46.63
[truncated: 437,692 more chars]
